# Supplementary material for: Genetic and Genomic Architecture of the Evolution of Resistance to Antifungal Drug Combinations
Source: PLoS Genet. 2013 Apr 4;9(4):e1003390. doi: 10.1371/journal.pgen.1003390 (PMC3617151; doi:10.1371/journal.pgen.1003390)
Supplement: Table S4 — High confidence single nucleotide variants (coding and non-coding) identified in C. albicans. (XLSX) [file pgen.1003390.s006.xlsx]

## Sheet: Ca-F-4
Table S4. High confidence single nucleotide variants (coding and non-coding) identified in C. albicans.
chrom	position	ref_base	var_base	normal_counts_a	normal_counts_b	mutant_counts_a	mutant_counts_b	featureName	geneName	aliases	featureType	description	peptide change	nucleotide change	feature name	#SNVs/gene (including noise)	Genotype
Ca21chr1_C_albicans_SC5314	44841	A	G	88	46	37	76	Tca8-1;orf19.6078	POL93	TCA8;IPF17652.3|Contig4-2396_0002|Contig4-2396_0003|Contig4-2960_0011|orf6.241|orf6.1756|CA0037|CaO19.6078|IPF17652.2	retrotransposon;ORF|Uncharacterized|transposable element gene	Retrotransposon Tca8 on Chromosome 1, about 4 kbp member of the gypsy group with two partial ORFs similar to gag and pol, flanked by 395-bp LTRs (beta elements);Predicted ORF in retrotransposon Tca8 with similarity to the Pol region of retrotransposons encoding reverse transcriptase, protease and integrase; downregulated in response to ciclopirox olamine; induced upon biofilm formation	V346V	A1037G	orf19.6078-P	1	HET
Ca21chr1_C_albicans_SC5314	607835	G	T	59	3	5	6								UPSTREAM:orf19.2978-P	1	HET
Ca21chr1_C_albicans_SC5314	1022741	C	A	93	0	28	17								UPSTREAM:orf19.751-P	1	HET
Ca21chr1_C_albicans_SC5314	1033846	T	C	55	0	4	4								UPSTREAM:orf19.48-P	1	HET
Ca21chr1_C_albicans_SC5314	2006195	G	A	141	0	18	20								UPSTREAM:orf19.4774-P	1	HET
Ca21chr1_C_albicans_SC5314	2779638	A	G	50	0	7	4								UPSTREAM:orf19.6346-P	1	HET
Ca21chr1_C_albicans_SC5314	2790243	T	G	97	0	11	6								UPSTREAM:orf19.6341-P	1	HET
Ca21chr2_C_albicans_SC5314	453981	C	A	105	7	17	12								UPSTREAM:orf19.1543-P	1	HET
Ca21chr2_C_albicans_SC5314	608385	T	A	81	2	4	3								UPSTREAM:orf19.5799-P	1	HET
Ca21chr3_C_albicans_SC5314	407660	G	C	150	0	20	25								UPSTREAM:orf19.1663-P	1	HET
Ca21chr3_C_albicans_SC5314	638871	C	G	96	0	9	6								UPSTREAM:orf19.298-P	1	HET
Ca21chr3_C_albicans_SC5314	667208	T	C	41	2	9	7	orf19.310		orf19.7943|IPF1480.1|IPF1481.1|Contig4-1938_0004|Contig4-1938_0005|orf6.4448|orf6.4450|CA6248|orf19.312|CA6247|ECM181.5f|ECM181.3f	ORF|Uncharacterized	Putative mitochondrial protein with a predicted role in cell wall biogenesis; possibly an essential gene, disruptants not obtained by UAU1 method	R22R	T65C	orf19.310-P	1	HET
Ca21chr7_C_albicans_SC5314	617636	A	G	104	7	18	14								UPSTREAM:orf19.5178-P	1	HET
Ca21chrR_C_albicans_SC5314	416569	T	C	82	41	8	31								UPSTREAM:orf19.2583.1-P	1	HET
Ca21chrR_C_albicans_SC5314	844603	G	T	77	5	9	7								UPSTREAM:orf19.4377-P	1	HET
Ca21chrR_C_albicans_SC5314	1217227	A	G	77	4	5	3								UPSTREAM:orf19.6639-P	1	HET
Ca21chrR_C_albicans_SC5314	1791885	A	G	47	1	7	8	orf19.6390		orf19.13748|orf6.7864|CaO19.6390|CaO19.13748	ORF|Uncharacterized		P55P	A164G	orf19.6390-P	1	HET
Ca21chr1_C_albicans_SC5314	174846	A	C	114	7	50	28	orf19.6017		orf19.13438|IPF21049.1|IPF13839.1|Contig4-2810_0020|orf6.1429|CA0477|MCM1|CaO19.6017|CaO19.13438|IPF13839	ORF|Uncharacterized		P127P	A380C	orf19.6017-P	2	HET
Ca21chr1_C_albicans_SC5314	2225817	C	A	149	0	34	28								UPSTREAM:orf19.4884-P	2	HET
Ca21chr4_C_albicans_SC5314	362020	G	A	77	3	8	5								UPSTREAM:orf19.4609-P	2	HET
Ca21chr4_C_albicans_SC5314	362022	G	A	79	2	9	5								UPSTREAM:orf19.4609-P	2	HET
Ca21chr4_C_albicans_SC5314	622133	C	T	76	36	22	50	orf19.2694	TYS1	orf19.10209|IPF24614.1|IPF5023.2|Contig4-2782_0005|Contig4-2865_0013|orf6.5482|CA3261|CaO19.2694|CaO19.10209	ORF|Uncharacterized	Putative tRNA-Tyr synthetase; genes encoding ribosomal subunits, translation factors, and tRNA synthetases are downregulated upon phagocytosis by murine macrophages; stationary phase enriched protein	D189D	C566T	orf19.2694-P	2	HET
Ca21chrR_C_albicans_SC5314	636702	G	A	72	31	14	43								UPSTREAM:orf19.2836-P	2	HET
Ca21chrR_C_albicans_SC5314	1624525	A	G	117	59	37	85	orf19.6116	GLK4	orf19.13535|IPF8388.2|IPF20985.1|IPF18395.1|Contig4-1499_0003|Contig4-2916_0003|orf6.1017|orf6.5097|orf19.1408|CaO19.13535|CaO19.6116	ORF|Uncharacterized	Putative glucokinase; decreased expression in hyphae compared to yeast-form cells	G327G	A980G	orf19.6116-P	2	HET
Ca21chr1_C_albicans_SC5314	2002264	A	C	79	1	3	8								UPSTREAM:orf19.4772-P	3	HET
Ca21chr1_C_albicans_SC5314	2272894	G	A	108	6	32	22	orf19.4899	GCA1	orf19.12365|MP190|IPF22352.1|IPF8948.2|AMYG1|Contig4-2932_0006|Contig4-2955_0029|orf6.2026|orf6.4236|orf6.5799|orf6.649|CA0855|CaO19.4899	ORF|Verified	Predicted extracellular or plasma membrane-associated glucoamylase; promotes biofilm matrix formation; possible adhesin; gene transcribed during rat oral infection; transcription regulated by carbohydrates, pH, galactose; biofilm-induced	E452E	G1355A	orf19.4899-P	3	HET
Ca21chr7_C_albicans_SC5314	674957	A	G	75	38	13	34								UPSTREAM:orf19.5144-P	3	HET
Ca21chrR_C_albicans_SC5314	804632	G	A	159	10	57	33								UPSTREAM:orf19.4361-P	3	HET
Ca21chrR_C_albicans_SC5314	804635	T	C	168	9	59	33								UPSTREAM:orf19.4361-P	3	HET
Ca21chrR_C_albicans_SC5314	804678	T	C	186	11	61	47								UPSTREAM:orf19.4361-P	3	HET
Ca21chr4_C_albicans_SC5314	847625	T	C	75	6	13	7	orf19.1207;RB2-4a		IPF27537.1|Contig4-2606_0009|orf6.840|CaO19.1207	ORF|Dubious;repeat_region	Repeat sequence RB2 on Chromosome 4 (partial); RB2 units are part of the Major Repeat Sequence (MRS) found on most chromosomes; may serve as recombination hotspots	*111Q	T330C	orf19.1207-P	4	HET
Ca21chr4_C_albicans_SC5314	1441214	C	T	77	18	10	40								UPSTREAM:orf19.2886-P	4	HET
Ca21chr5_C_albicans_SC5314	1190476	C	T	80	3	25	15								UPSTREAM:orf19.4055-P	4	HET
Ca21chr5_C_albicans_SC5314	1190531	A	G	29	1	13	8								UPSTREAM:orf19.4055-P	4	HET
Ca21chr6_C_albicans_SC5314	327892	A	T	32	1	8	8								UPSTREAM:orf19.3428-P	4	HET
Ca21chrR_C_albicans_SC5314	1561392	A	G	68	5	28	26	orf19.733		orf19.8352|IPF26581.1|IPF20141.1|Contig4-2506_0007|orf6.6010|ZSP12|CaO19.8352|CaO19.733	ORF|Uncharacterized		T201T	A602G	orf19.733-P	4	HET
Ca21chr2_C_albicans_SC5314	1770566	T	A	71	5	17	15								UPSTREAM:orf19.3606-P	5	HET
Ca21chr2_C_albicans_SC5314	1770577	T	G	66	5	13	15								UPSTREAM:orf19.3606-P	5	HET
Ca21chr2_C_albicans_SC5314	1827436	A	G	47	2	14	8	orf19.207	PGA55	orf19.7838|IPF15911.3|IPF13437.3|Contig4-2967_0022|orf6.5166|orf6.5940|CA3039|CaO19.207	ORF|Uncharacterized	Putative GPI-anchored protein; adhesin-like protein; filament induced; regulated by Nrg1p, Tup1p; possibly transcriptionally regulated upon hyphal formation; mRNA binds to She3p and is localized to buds of yeast-form cells and hyphal tips	R242R	A725G	orf19.207-P	5	HET
Ca21chr4_C_albicans_SC5314	262878	G	A	56	29	12	35								UPSTREAM:orf19.4657-P	5	HET
Ca21chr4_C_albicans_SC5314	586097	A	G	67	5	9	8	epsilon-4a		epsilon	long_terminal_repeat	Long terminal repeat (LTR); about 480 bp long, 9 copies per genome			UPSTREAM:orf19.2713-P	5	HET
Ca21chr4_C_albicans_SC5314	1165047	G	A	64	29	9	28								UPSTREAM:orf19.1793-P	5	HET
Ca21chrR_C_albicans_SC5314	1609043	A	G	58	31	13	34								UPSTREAM:orf19.6126-P	5	HET
Ca21chr1_C_albicans_SC5314	3187300	A	G	104	7	41	24	gamma-1c		gamma	long_terminal_repeat	Solo copy of the long terminal repeat (LTR) associated with the transposon Tca2; about 280 bp long, 5-10 copies per genome			UPSTREAM:orf19.7276.1-P	6	HET
Ca21chr4_C_albicans_SC5314	1179215	C	T	56	28	12	42								UPSTREAM:orf19.1797-P	6	HET
Ca21chrR_C_albicans_SC5314	1066027	A	T	57	25	7	32								UPSTREAM:orf19.1805-P	6	HET
Ca21chr4_C_albicans_SC5314	897718	G	A	101	8	13	14	orf19.5290;orf19.1430		orf19.12748|orf6.3944|IPF21848.1|IPF17022.3|CaO19.5290|CaO19.12748;orf19.12773|orf19.9006|IPF25911.1|IPF9379.3|IPF19810.1|IPF28064.1|Contig4-2598_0008|Contig4-2598_0009|orf6.6399|orf6.8302|CA3969|CA5481|orf19.5313|IPF9379.5eoc|IPF9379|IPF9379.2	ORF|Uncharacterized;ORF|Uncharacterized	Hap43p-induced gene; transcription is negatively regulated by Sfu1p	S676N;S275N	G2026A;G823A	orf19.1430-P;orf19.5290-P	7	HET
Ca21chr4_C_albicans_SC5314	1104104	A	C	55	1	3	3								UPSTREAM:orf19.740-P	7	HET
Ca21chr1_C_albicans_SC5314	45894	A	T	77	6	26	36	Tca8-1;beta-1c		TCA8;beta	retrotransposon;long_terminal_repeat	Retrotransposon Tca8 on Chromosome 1, about 4 kbp member of the gypsy group with two partial ORFs similar to gag and pol, flanked by 395-bp LTRs (beta elements);Long terminal repeat (LTR) associated with the transposon Tca8; about 395 bp long, 6-8 copies per genome			UPSTREAM:orf19.6077-P	8	HET
Ca21chr4_C_albicans_SC5314	167769	T	G	88	36	15	41								UPSTREAM:orf19.4702-P	8	HET
Ca21chr4_C_albicans_SC5314	1548533	G	A	81	40	8	28								UPSTREAM:orf19.3110-P	8	HET
Ca21chrR_C_albicans_SC5314	353046	A	C	51	1	11	6	orf19.2539		orf19.10073|IPF24810.1|IPF29071.1|orf6.2348|CaO19.2539|CaO19.10073	ORF|Uncharacterized	Predicted ORF in Assemblies 19, 20 and 21; transcription detected in high-resolution tiling array experiments	L77F	A230C	orf19.2539-P	8	HET
Ca21chrR_C_albicans_SC5314	840022	C	T	82	32	8	25								UPSTREAM:orf19.4374-P	8	HET
Ca21chrR_C_albicans_SC5314	1884144	A	T	80	0	27	16								UPSTREAM:orf19.6447-P	8	HET
Ca21chr1_C_albicans_SC5314	1294186	C	T	137	10	32	21								UPSTREAM:orf19.2662-P	9	HET
Ca21chr1_C_albicans_SC5314	8265	A	G	15	0	1	3								UPSTREAM:orf19.6112-P	10	HET
Ca21chr4_C_albicans_SC5314	671612	T	A	71	23	12	42	orf19.2671		orf19.10186|orf6.154|IPF24612.1|IPF10564.2|Contig4-2584_0001|orf6.5563|CA3328|CaO19.2671|CaO19.10186|IPF10564	ORF|Uncharacterized	Predicted ORF in Assemblies 19, 20 and 21; Plc1p-regulated; possibly an essential gene, disruptants not obtained by UAU1 method	S77T	T228A	orf19.2671-P	10	HET
Ca21chr4_C_albicans_SC5314	671806	C	T	85	7	39	28	orf19.2671		orf19.10186|orf6.154|IPF24612.1|IPF10564.2|Contig4-2584_0001|orf6.5563|CA3328|CaO19.2671|CaO19.10186|IPF10564	ORF|Uncharacterized	Predicted ORF in Assemblies 19, 20 and 21; Plc1p-regulated; possibly an essential gene, disruptants not obtained by UAU1 method	L141L	C422T	orf19.2671-P	10	HET
Ca21chrR_C_albicans_SC5314	1209659	A	T	90	44	21	46	orf19.6643	MCT1	orf19.13964|IPF20516.1|IPF5013.1|Contig4-3035_0008|Contig4-3035_0009|orf6.6540|CA4087|CaO19.6643|CaO19.13964|IPF5013	ORF|Uncharacterized	Putative malonyl-CoA acyl carrier protein acyltransferase	A54A	A161T	orf19.6643-P	10	HET
Ca21chrR_C_albicans_SC5314	1209663	T	A	87	42	20	44	orf19.6643	MCT1	orf19.13964|IPF20516.1|IPF5013.1|Contig4-3035_0008|Contig4-3035_0009|orf6.6540|CA4087|CaO19.6643|CaO19.13964|IPF5013	ORF|Uncharacterized	Putative malonyl-CoA acyl carrier protein acyltransferase	L56M	T165A	orf19.6643-P	10	HET
Ca21chrR_C_albicans_SC5314	1209668	T	C	88	40	15	44	orf19.6643	MCT1	orf19.13964|IPF20516.1|IPF5013.1|Contig4-3035_0008|Contig4-3035_0009|orf6.6540|CA4087|CaO19.6643|CaO19.13964|IPF5013	ORF|Uncharacterized	Putative malonyl-CoA acyl carrier protein acyltransferase	N57N	T170C	orf19.6643-P	10	HET
Ca21chrR_C_albicans_SC5314	1209669	T	G	86	43	16	44	orf19.6643	MCT1	orf19.13964|IPF20516.1|IPF5013.1|Contig4-3035_0008|Contig4-3035_0009|orf6.6540|CA4087|CaO19.6643|CaO19.13964|IPF5013	ORF|Uncharacterized	Putative malonyl-CoA acyl carrier protein acyltransferase	C58G	T171G	orf19.6643-P	10	HET
Ca21chrR_C_albicans_SC5314	1209670	G	A	85	42	14	44	orf19.6643	MCT1	orf19.13964|IPF20516.1|IPF5013.1|Contig4-3035_0008|Contig4-3035_0009|orf6.6540|CA4087|CaO19.6643|CaO19.13964|IPF5013	ORF|Uncharacterized	Putative malonyl-CoA acyl carrier protein acyltransferase	C58Y	G172A	orf19.6643-P	10	HET
Ca21chrR_C_albicans_SC5314	1209671	C	A	87	40	14	44	orf19.6643	MCT1	orf19.13964|IPF20516.1|IPF5013.1|Contig4-3035_0008|Contig4-3035_0009|orf6.6540|CA4087|CaO19.6643|CaO19.13964|IPF5013	ORF|Uncharacterized	Putative malonyl-CoA acyl carrier protein acyltransferase	C58*	C173A	orf19.6643-P	10	HET
Ca21chrR_C_albicans_SC5314	1337489	C	A	68	3	20	12								UPSTREAM:orf19.3884-P	11	HET
Ca21chr1_C_albicans_SC5314	2802656	A	G	64	34	18	45	orf19.4917		orf19.12383|IPF22284.1|IPF12669.2|Contig4-1725_0008|orf6.3296|CA6217|CaO19.4917|CaO19.12383|IPF12669.5f	ORF|Uncharacterized		L163L	A488G	orf19.4917-P	12	HET
Ca21chr1_C_albicans_SC5314	2802659	G	A	66	33	20	45	orf19.4917		orf19.12383|IPF22284.1|IPF12669.2|Contig4-1725_0008|orf6.3296|CA6217|CaO19.4917|CaO19.12383|IPF12669.5f	ORF|Uncharacterized		T162T	G485A	orf19.4917-P	12	HET
Ca21chr4_C_albicans_SC5314	1406913	T	C	30	1	6	6								UPSTREAM:orf19.2903-P	12	HET
Ca21chr6_C_albicans_SC5314	864338	G	A	72	4	16	10	RB2-6;MRS-6;orf19.5775		orf19.13197|IPF21457.1|IPF20146.1|Contig4-2914_0008|orf6.6183|CA3817|CaO19.5775|CaO19.13197|IFV7	repeat_region;repeat_region;ORF|Uncharacterized	Repeat sequence of about 6 kb, part of the Major Repeat Sequence (MRS) on Chromosome 6; MRS units are found on most chromosomes; may serve as recombination hotspots;Major Repeat Sequence (MRS) on Chromosome 6; MRS units are composed of variable numbers of RPS units flanked by HOK and RB2 sequences; found on most chromosomes; may serve as recombination hot spot;Predicted ORF in Assemblies 19, 20 a…	V148I	G441A	orf19.5775-P	12	HET
Ca21chrR_C_albicans_SC5314	1422862	G	A	72	27	13	50								UPSTREAM:orf19.700-P	12	HET
Ca21chrR_C_albicans_SC5314	1422865	G	A	66	35	11	51								UPSTREAM:orf19.700-P	12	HET
Ca21chr6_C_albicans_SC5314	190204	A	G	74	37	13	37								UPSTREAM:orf19.97-P	13	HET
Ca21chr6_C_albicans_SC5314	190207	A	G	70	37	14	37								UPSTREAM:orf19.97-P	13	HET
Ca21chrR_C_albicans_SC5314	1067826	G	T	55	3	10	7								UPSTREAM:orf19.1806-P	13	HET
Ca21chrR_C_albicans_SC5314	1647582	T	C	68	28	14	46								UPSTREAM:orf19.728-P	13	HET
Ca21chrR_C_albicans_SC5314	1647583	A	G	67	28	14	46								UPSTREAM:orf19.728-P	13	HET
Ca21chrR_C_albicans_SC5314	1647586	C	T	66	29	14	46								UPSTREAM:orf19.728-P	13	HET
Ca21chrR_C_albicans_SC5314	1647738	T	A	84	41	17	42								UPSTREAM:orf19.728-P	13	HET
Ca21chrR_C_albicans_SC5314	1647837	A	G	56	24	4	22								UPSTREAM:orf19.728-P	13	HET
Ca21chr4_C_albicans_SC5314	532493	T	C	30	1	8	15	orf19.2743		orf19.10257|IPF19520.2|IPF15357.2|Contig4-1974_0001|Contig4-2458_0009|RPH1|CaO19.2743	ORF|Uncharacterized		S383S	T1148C	orf19.2743-P	14	HET
Ca21chr4_C_albicans_SC5314	532496	G	A	28	1	7	15	orf19.2743		orf19.10257|IPF19520.2|IPF15357.2|Contig4-1974_0001|Contig4-2458_0009|RPH1|CaO19.2743	ORF|Uncharacterized		G382G	G1145A	orf19.2743-P	14	HET
Ca21chr4_C_albicans_SC5314	532502	C	A	25	1	9	15	orf19.2743		orf19.10257|IPF19520.2|IPF15357.2|Contig4-1974_0001|Contig4-2458_0009|RPH1|CaO19.2743	ORF|Uncharacterized		S380S	C1139A	orf19.2743-P	14	HET
Ca21chr4_C_albicans_SC5314	532589	A	G	36	11	6	24	orf19.2743		orf19.10257|IPF19520.2|IPF15357.2|Contig4-1974_0001|Contig4-2458_0009|RPH1|CaO19.2743	ORF|Uncharacterized		I351M	A1052G	orf19.2743-P	14	HET
Ca21chr4_C_albicans_SC5314	532595	G	T	38	11	6	25	orf19.2743		orf19.10257|IPF19520.2|IPF15357.2|Contig4-1974_0001|Contig4-2458_0009|RPH1|CaO19.2743	ORF|Uncharacterized		M349I	G1046T	orf19.2743-P	14	HET
Ca21chr4_C_albicans_SC5314	772243	G	T	72	25	14	40								UPSTREAM:orf19.1314-P	14	HET
Ca21chr4_C_albicans_SC5314	847680	G	C	61	4	10	9	RB2-4a			repeat_region	Repeat sequence RB2 on Chromosome 4 (partial); RB2 units are part of the Major Repeat Sequence (MRS) found on most chromosomes; may serve as recombination hotspots			UPSTREAM:orf19.787-P	14	HET
Ca21chr4_C_albicans_SC5314	847729	G	A	59	2	5	11	RB2-4a			repeat_region	Repeat sequence RB2 on Chromosome 4 (partial); RB2 units are part of the Major Repeat Sequence (MRS) found on most chromosomes; may serve as recombination hotspots			UPSTREAM:orf19.787-P	14	HET
Ca21chr4_C_albicans_SC5314	847740	A	G	57	1	11	6	RB2-4a			repeat_region	Repeat sequence RB2 on Chromosome 4 (partial); RB2 units are part of the Major Repeat Sequence (MRS) found on most chromosomes; may serve as recombination hotspots			UPSTREAM:orf19.787-P	14	HET
Ca21chrR_C_albicans_SC5314	1684620	T	C	69	0	2	4								UPSTREAM:orf19.3706-P	14	HET
Ca21chrR_C_albicans_SC5314	1696	G	A	64	0	1	3								UPSTREAM:orf19.7544-P	15	HET
Ca21chrR_C_albicans_SC5314	1697	A	G	66	0	1	3								UPSTREAM:orf19.7544-P	15	HET
Ca21chr4_C_albicans_SC5314	209234	A	G	65	34	18	49	orf19.4683	MLP1	orf19.12152|IPF22637.1|IPF10559.2|Contig4-1629_0001|orf6.5453|orf6.68|CA3240|CaO19.4683|IPF10559	ORF|Uncharacterized	Ortholog of S. cerevisiae MLP1	T41A	A120G	orf19.4683-P	16	HET
Ca21chrR_C_albicans_SC5314	1095078	A	C	81	41	16	38								UPSTREAM:orf19.646-P	16	HET
Ca21chr2_C_albicans_SC5314	2154215	T	G	79	6	7	8	MRS-2;RB2-2			repeat_region;repeat_region	Major Repeat Sequence (MRS) on Chromosome 2; MRS units are composed of variable numbers of RPS units flanked by HOK and RB2 sequences; found on most chromosomes; may serve as recombination hot spot;Repeat sequence of about 6 kb, part of the Major Repeat Sequence (MRS) on Chromosome 2; MRS units are found on most chromosomes; may serve as recombination hotspots			UPSTREAM:orf19.5320-P	17	HET
Ca21chrR_C_albicans_SC5314	1578522	A	G	76	2	12	9								UPSTREAM:orf19.6146-P	18	HET
Ca21chrR_C_albicans_SC5314	1579205	T	C	58	28	17	44								UPSTREAM:orf19.6146-P	18	HET
Ca21chrR_C_albicans_SC5314	1579209	A	C	58	29	18	45								UPSTREAM:orf19.6146-P	18	HET
Ca21chrR_C_albicans_SC5314	1579211	C	G	56	29	21	45								UPSTREAM:orf19.6146-P	18	HET
Ca21chr4_C_albicans_SC5314	1598284	G	A	74	0	27	20								UPSTREAM:orf19.3074-P	19	HET
Ca21chr4_C_albicans_SC5314	1599840	G	A	84	31	12	45								UPSTREAM:orf19.3074-P	19	HET
Ca21chr4_C_albicans_SC5314	1599841	A	T	79	31	16	45								UPSTREAM:orf19.3074-P	19	HET
Ca21chr4_C_albicans_SC5314	1599848	C	T	83	35	13	45								UPSTREAM:orf19.3074-P	19	HET
Ca21chr4_C_albicans_SC5314	1599849	A	C	85	34	13	45								UPSTREAM:orf19.3074-P	19	HET
Ca21chr4_C_albicans_SC5314	1600286	A	G	58	4	9	5								UPSTREAM:orf19.3074-P	19	HET
Ca21chrR_C_albicans_SC5314	1557838	A	G	89	7	22	20	orf19.11		orf19.7684|orf6.1705|IPF27233.1|IPF11566.1|Contig4-2506_0003|CA0650|CaO19.11|CaO19.7684|IPF11566	ORF|Uncharacterized	Gene transcription regulated by Mig1p and Tup1p	K145K	A434G	orf19.11-P	20	HET
Ca21chrR_C_albicans_SC5314	1557842	C	T	90	3	23	19	orf19.11		orf19.7684|orf6.1705|IPF27233.1|IPF11566.1|Contig4-2506_0003|CA0650|CaO19.11|CaO19.7684|IPF11566	ORF|Uncharacterized	Gene transcription regulated by Mig1p and Tup1p	T144I	C430T	orf19.11-P	20	HET
Ca21chrR_C_albicans_SC5314	1557850	T	C	97	4	21	23	orf19.11		orf19.7684|orf6.1705|IPF27233.1|IPF11566.1|Contig4-2506_0003|CA0650|CaO19.11|CaO19.7684|IPF11566	ORF|Uncharacterized	Gene transcription regulated by Mig1p and Tup1p	G141G	T422C	orf19.11-P	20	HET
Ca21chrR_C_albicans_SC5314	1557874	C	T	92	21	19	52	orf19.11		orf19.7684|orf6.1705|IPF27233.1|IPF11566.1|Contig4-2506_0003|CA0650|CaO19.11|CaO19.7684|IPF11566	ORF|Uncharacterized	Gene transcription regulated by Mig1p and Tup1p	P133P	C398T	orf19.11-P	20	HET
Ca21chrR_C_albicans_SC5314	1557945	C	T	108	35	18	51	orf19.11		orf19.7684|orf6.1705|IPF27233.1|IPF11566.1|Contig4-2506_0003|CA0650|CaO19.11|CaO19.7684|IPF11566	ORF|Uncharacterized	Gene transcription regulated by Mig1p and Tup1p	L110F	C327T	orf19.11-P	20	HET
Ca21chrR_C_albicans_SC5314	1557992	G	C	58	3	10	12	orf19.11		orf19.7684|orf6.1705|IPF27233.1|IPF11566.1|Contig4-2506_0003|CA0650|CaO19.11|CaO19.7684|IPF11566	ORF|Uncharacterized	Gene transcription regulated by Mig1p and Tup1p	R94P	G280C	orf19.11-P	20	HET
Ca21chrR_C_albicans_SC5314	1557993	G	T	59	3	10	12	orf19.11		orf19.7684|orf6.1705|IPF27233.1|IPF11566.1|Contig4-2506_0003|CA0650|CaO19.11|CaO19.7684|IPF11566	ORF|Uncharacterized	Gene transcription regulated by Mig1p and Tup1p	A94S	G279T	orf19.11-P	20	HET
Ca21chrR_C_albicans_SC5314	1557994	C	T	60	3	9	12	orf19.11		orf19.7684|orf6.1705|IPF27233.1|IPF11566.1|Contig4-2506_0003|CA0650|CaO19.11|CaO19.7684|IPF11566	ORF|Uncharacterized	Gene transcription regulated by Mig1p and Tup1p	N93N	C278T	orf19.11-P	20	HET
Ca21chrR_C_albicans_SC5314	1558005	T	G	56	2	10	9	orf19.11		orf19.7684|orf6.1705|IPF27233.1|IPF11566.1|Contig4-2506_0003|CA0650|CaO19.11|CaO19.7684|IPF11566	ORF|Uncharacterized	Gene transcription regulated by Mig1p and Tup1p	*90E	T267G	orf19.11-P	20	HET
Ca21chrR_C_albicans_SC5314	1558006	G	A	54	2	10	9	orf19.11		orf19.7684|orf6.1705|IPF27233.1|IPF11566.1|Contig4-2506_0003|CA0650|CaO19.11|CaO19.7684|IPF11566	ORF|Uncharacterized	Gene transcription regulated by Mig1p and Tup1p	R89R	G266A	orf19.11-P	20	HET
Ca21chrR_C_albicans_SC5314	1558007	C	T	54	2	10	9	orf19.11		orf19.7684|orf6.1705|IPF27233.1|IPF11566.1|Contig4-2506_0003|CA0650|CaO19.11|CaO19.7684|IPF11566	ORF|Uncharacterized	Gene transcription regulated by Mig1p and Tup1p	T89I	C265T	orf19.11-P	20	HET
Ca21chrR_C_albicans_SC5314	1558016	C	T	52	3	10	12	orf19.11		orf19.7684|orf6.1705|IPF27233.1|IPF11566.1|Contig4-2506_0003|CA0650|CaO19.11|CaO19.7684|IPF11566	ORF|Uncharacterized	Gene transcription regulated by Mig1p and Tup1p	T86I	C256T	orf19.11-P	20	HET
Ca21chr1_C_albicans_SC5314	1681409	G	A	50	0	16	9	HOK-1;MRS-1			repeat_region;repeat_region	Repeat sequence of about 8 kb, part of the Major Repeat Sequence (MRS) on Chromosome 1; MRS units are found on most chromosomes; may serve as recombination hotspots;Major Repeat Sequence (MRS) on Chromosome 1; MRS units are composed of variable numbers of RPS units flanked by HOK and RB2 sequences; found on most chromosomes; may serve as recombination hot spot			UPSTREAM:orf19.1233-P	22	HET
Ca21chr2_C_albicans_SC5314	216	A	G	101	16	19	43								UPSTREAM:orf19.1925-P	22	HET
Ca21chrR_C_albicans_SC5314	549505	C	T	78	38	7	23								UPSTREAM:orf19.176-P	22	HET
Ca21chrR_C_albicans_SC5314	549852	C	T	89	42	20	48								UPSTREAM:orf19.176-P	22	HET
Ca21chr4_C_albicans_SC5314	554750	T	C	29	14	8	44	orf19.2730		orf19.10244|IPF24597.1|IPF20076.1|Contig4-2458_0008|Contig4-2458_0009|orf6.2522|orf6.4699|orf6.885|CA1163|RPH2|CaO19.2730|CaO19.10244|IPF15357	ORF|Uncharacterized		F271F	T812C	orf19.2730-P	23	HET
Ca21chr4_C_albicans_SC5314	554765	G	A	36	10	9	41	orf19.2730		orf19.10244|IPF24597.1|IPF20076.1|Contig4-2458_0008|Contig4-2458_0009|orf6.2522|orf6.4699|orf6.885|CA1163|RPH2|CaO19.2730|CaO19.10244|IPF15357	ORF|Uncharacterized		T276T	G827A	orf19.2730-P	23	HET
Ca21chr4_C_albicans_SC5314	1201394	A	G	466	202	139	396	MRS-4;RPS-4			repeat_region;repeat_region	Major Repeat Sequence (MRS) on Chromosome 4; MRS units are composed of variable numbers of RPS units flanked by HOK and RB2 sequences; found on most chromosomes; may serve as recombination hot spot;Repeat sequence of about 2 kb on Chromosome 4, about 60 copies are found in tandem repeats on most chromosomes; RPS units flanked by conserved HOK and RB2 sequences form Major Repeat Sequence (MRS); ma…			UPSTREAM:orf19.1234-P	25	HET
Ca21chrR_C_albicans_SC5314	664586	G	T	114	60	15	50								UPSTREAM:orf19.2848-P	25	HET
Ca21chrR_C_albicans_SC5314	733273	A	G	88	44	18	40								UPSTREAM:orf19.2397-P	27	HET
Ca21chrR_C_albicans_SC5314	726708	C	T	86	38	13	39	orf19.2399		orf19.9935|orf6.229|IPF14284.2|IPF15229.2|Contig4-2658_0008|orf6.3674|CA1961|CaO19.2399|JJJ1|IPF14284	ORF|Uncharacterized	Putative transcription factor with zinc finger DNA-binding motif; similar to bacterial DnaJ; transcriptionally regulated by iron; expression greater in low iron	N492N	C1475T	orf19.2399-P	28	HET
Ca21chrR_C_albicans_SC5314	726714	C	T	78	28	14	36	orf19.2399		orf19.9935|orf6.229|IPF14284.2|IPF15229.2|Contig4-2658_0008|orf6.3674|CA1961|CaO19.2399|JJJ1|IPF14284	ORF|Uncharacterized	Putative transcription factor with zinc finger DNA-binding motif; similar to bacterial DnaJ; transcriptionally regulated by iron; expression greater in low iron	S490S	C1469T	orf19.2399-P	28	HET
Ca21chr5_C_albicans_SC5314	722533	G	A	122	6	20	12								UPSTREAM:orf19.4349-P	35	HET
Ca21chr5_C_albicans_SC5314	722536	A	G	121	7	20	12								UPSTREAM:orf19.4349-P	35	HET
Ca21chr5_C_albicans_SC5314	722537	G	T	119	6	20	12								UPSTREAM:orf19.4349-P	35	HET
Ca21chr5_C_albicans_SC5314	722540	C	T	121	6	21	12								UPSTREAM:orf19.4349-P	35	HET
Ca21chr6_C_albicans_SC5314	870415	T	C	74	5	27	15	MRS-6;HOK-6			repeat_region;repeat_region	Major Repeat Sequence (MRS) on Chromosome 6; MRS units are composed of variable numbers of RPS units flanked by HOK and RB2 sequences; found on most chromosomes; may serve as recombination hot spot;Repeat sequence of about 8 kb, part of the Major Repeat Sequence (MRS) on Chromosome 6; MRS units are found on most chromosomes; may serve as recombination hotspots			UPSTREAM:orf19.5775-P	36	HET
Ca21chr4_C_albicans_SC5314	1207372	T	G	70	5	9	7	MRS-4;RB2-4			repeat_region;repeat_region	Major Repeat Sequence (MRS) on Chromosome 4; MRS units are composed of variable numbers of RPS units flanked by HOK and RB2 sequences; found on most chromosomes; may serve as recombination hot spot;Repeat sequence of about 6 kb, part of the Major Repeat Sequence (MRS) on Chromosome 4; MRS units are found on most chromosomes; may serve as recombination hotspots			UPSTREAM:orf19.1235-P	39	HET
Ca21chrR_C_albicans_SC5314	1286156	A	T	69	37	4	22								UPSTREAM:orf19.3852-P	42	HET
Ca21chr2_C_albicans_SC5314	2148296	A	G	204	14	34	25	MRS-2;RPS-2			repeat_region;repeat_region	Major Repeat Sequence (MRS) on Chromosome 2; MRS units are composed of variable numbers of RPS units flanked by HOK and RB2 sequences; found on most chromosomes; may serve as recombination hot spot;Repeat sequence of about 2 kb on Chromosome 2, about 60 copies are found in tandem repeats on most chromosomes; RPS units flanked by conserved HOK and RB2 sequences form Major Repeat Sequence (MRS); ma…			UPSTREAM:orf19.3490-P	45	HET
Ca21chr2_C_albicans_SC5314	2151255	G	A	58	3	5	3	MRS-2;RB2-2			repeat_region;repeat_region	Major Repeat Sequence (MRS) on Chromosome 2; MRS units are composed of variable numbers of RPS units flanked by HOK and RB2 sequences; found on most chromosomes; may serve as recombination hot spot;Repeat sequence of about 6 kb, part of the Major Repeat Sequence (MRS) on Chromosome 2; MRS units are found on most chromosomes; may serve as recombination hotspots			UPSTREAM:orf19.3490-P	45	HET
Ca21chrR_C_albicans_SC5314	1787877	G	A	88	33	24	50								UPSTREAM:orf19.6385-P	46	HET
Ca21chr2_C_albicans_SC5314	925791	A	G	158	14	51	29	orf19.4510	IFA4	orf19.11986|IPF22740.1|IPF11199.2|Contig4-2894_0009|orf6.5001|CA2916|CaO19.11986|LPF29|CaO19.4510	ORF|Uncharacterized	Predicted ORF in Assemblies 19, 20 and 21; oxidative stress-induced via Cap1p	K46R	A136G	orf19.4510-P	47	HET
Ca21chr4_C_albicans_SC5314	833465	A	T	80	31	14	37	orf19.1596	FGR28	orf19.9164|IPF17205.1|IPF15031.1|Contig4-1965_0001|Contig4-1965_0002|orf6.1082|orf6.426|CA0296|CaO19.1596|LPF17|IFA11|CA0075|IFA24.3	ORF|Verified	Protein lacking an ortholog in S. cerevisiae; transposon mutation affects filamentous growth; possibly an essential gene, disruptants not obtained by UAU1 method	K239M	A715T	orf19.1596-P	47	HET
Ca21chrR_C_albicans_SC5314	1526442	A	G	82	43	14	48								UPSTREAM:orf19.2356-P	50	HET
Ca21chr4_C_albicans_SC5314	736185	G	A	77	41	11	43								UPSTREAM:orf19.3378-P	51	HET
Ca21chr4_C_albicans_SC5314	736186	A	T	80	42	11	43								UPSTREAM:orf19.3378-P	51	HET
Ca21chr4_C_albicans_SC5314	736187	C	T	81	42	10	43								UPSTREAM:orf19.3378-P	51	HET
Ca21chrR_C_albicans_SC5314	1743454	C	G	78	40	14	62	CENR			centromere	Centromere region of Chromosome R; each centromere mediates a single kinetochore attachment although it binds multiple (four) Cse4p-containing nucleosomes			UPSTREAM:orf19.599-P	55	HET
Ca21chrR_C_albicans_SC5314	1743806	C	G	83	39	37	74	CENR			centromere	Centromere region of Chromosome R; each centromere mediates a single kinetochore attachment although it binds multiple (four) Cse4p-containing nucleosomes			UPSTREAM:orf19.599-P	55	HET
Ca21chr7_C_albicans_SC5314	581671	C	T	57	14	35	85	MRS-7b;RPS-7b			repeat_region;repeat_region	Major Repeat Sequence (MRS) on Chromosome 7; MRS units are composed of variable numbers of RPS units flanked by HOK and RB2 sequences; found on most chromosomes; may serve as recombination hot spot;Repeat sequence of about 2 kb on Chromosome 7, about 60 copies are found in tandem repeats on most chromosomes; RPS units flanked by conserved HOK and RB2 sequences form Major Repeat Sequence (MRS); ma…			UPSTREAM:orf19.5191-P	57	HET
Ca21chr7_C_albicans_SC5314	581811	A	G	82	6	86	48	MRS-7b;RPS-7b			repeat_region;repeat_region	Major Repeat Sequence (MRS) on Chromosome 7; MRS units are composed of variable numbers of RPS units flanked by HOK and RB2 sequences; found on most chromosomes; may serve as recombination hot spot;Repeat sequence of about 2 kb on Chromosome 7, about 60 copies are found in tandem repeats on most chromosomes; RPS units flanked by conserved HOK and RB2 sequences form Major Repeat Sequence (MRS); ma…			UPSTREAM:orf19.5191-P	57	HET
Ca21chrR_C_albicans_SC5314	1351816	T	A	91	2	18	12	RB2-R;MRS-R			repeat_region;repeat_region	Repeat sequence of about 6 kb, part of the Major Repeat Sequence (MRS) on Chromosome R; MRS units are found on most chromosomes; may serve as recombination hotspots;Major Repeat Sequence (MRS) on Chromosome R; MRS units are composed of variable numbers of RPS units flanked by HOK and RB2 sequences; found on most chromosomes; may serve as recombination hot spot			UPSTREAM:orf19.727-P	98	HET
Ca21chrR_C_albicans_SC5314	1355082	G	A	77	32	16	40	MRS-R;HOK-R			repeat_region;repeat_region	Major Repeat Sequence (MRS) on Chromosome R; MRS units are composed of variable numbers of RPS units flanked by HOK and RB2 sequences; found on most chromosomes; may serve as recombination hot spot;Repeat sequence of about 8 kb, part of the Major Repeat Sequence (MRS) on Chromosome R; MRS units are found on most chromosomes; may serve as recombination hotspots			UPSTREAM:orf19.727-P	98	HET
Ca21chrR_C_albicans_SC5314	1355091	T	C	81	37	13	49	MRS-R;HOK-R			repeat_region;repeat_region	Major Repeat Sequence (MRS) on Chromosome R; MRS units are composed of variable numbers of RPS units flanked by HOK and RB2 sequences; found on most chromosomes; may serve as recombination hot spot;Repeat sequence of about 8 kb, part of the Major Repeat Sequence (MRS) on Chromosome R; MRS units are found on most chromosomes; may serve as recombination hotspots			UPSTREAM:orf19.727-P	98	HET
Ca21chrR_C_albicans_SC5314	1355095	C	T	79	38	11	52	MRS-R;HOK-R			repeat_region;repeat_region	Major Repeat Sequence (MRS) on Chromosome R; MRS units are composed of variable numbers of RPS units flanked by HOK and RB2 sequences; found on most chromosomes; may serve as recombination hot spot;Repeat sequence of about 8 kb, part of the Major Repeat Sequence (MRS) on Chromosome R; MRS units are found on most chromosomes; may serve as recombination hotspots			UPSTREAM:orf19.727-P	98	HET
Ca21chrR_C_albicans_SC5314	1355194	C	T	82	26	16	42	MRS-R;HOK-R			repeat_region;repeat_region	Major Repeat Sequence (MRS) on Chromosome R; MRS units are composed of variable numbers of RPS units flanked by HOK and RB2 sequences; found on most chromosomes; may serve as recombination hot spot;Repeat sequence of about 8 kb, part of the Major Repeat Sequence (MRS) on Chromosome R; MRS units are found on most chromosomes; may serve as recombination hotspots			UPSTREAM:orf19.727-P	98	HET
Ca21chrR_C_albicans_SC5314	1355198	T	C	82	30	15	44	MRS-R;HOK-R			repeat_region;repeat_region	Major Repeat Sequence (MRS) on Chromosome R; MRS units are composed of variable numbers of RPS units flanked by HOK and RB2 sequences; found on most chromosomes; may serve as recombination hot spot;Repeat sequence of about 8 kb, part of the Major Repeat Sequence (MRS) on Chromosome R; MRS units are found on most chromosomes; may serve as recombination hotspots			UPSTREAM:orf19.727-P	98	HET
Ca21chrR_C_albicans_SC5314	1357172	G	T	100	8	11	11	MRS-R;HOK-R;Ca3-R		CA3	repeat_region;repeat_region;repeat_region	Major Repeat Sequence (MRS) on Chromosome R; MRS units are composed of variable numbers of RPS units flanked by HOK and RB2 sequences; found on most chromosomes; may serve as recombination hot spot;Repeat sequence of about 8 kb, part of the Major Repeat Sequence (MRS) on Chromosome R; MRS units are found on most chromosomes; may serve as recombination hotspots;Ca3 region on Chromosome R; Ca3 is a…			UPSTREAM:orf19.727-P	98	HET
Ca21chr4_C_albicans_SC5314	527660	G	A	45	22	2	34	orf19.2746		orf19.10260|IPF14444.3|IPF28996.1|Contig4-3001_0019|orf6.4702|CA2702|EMP70|CaO19.2746|IPF14444.2	ORF|Uncharacterized	S. cerevisiae ortholog EMP70 has role in invasive growth in response to glucose limitation, cellular copper ion homeostasis, pseudohyphal growth and localizes to endosome, fungal-type vacuole membrane	L576L	G1727A	orf19.2746-P	2	HOM
Ca21chr4_C_albicans_SC5314	495269	G	A	19	5	1	14								UPSTREAM:orf19.2758-P	3	HOM
Ca21chr4_C_albicans_SC5314	495272	A	T	19	4	1	14								UPSTREAM:orf19.2758-P	3	HOM
Ca21chrR_C_albicans_SC5314	1412337	A	G	5	2	0	22								UPSTREAM:orf19.695-P	6	HOM
Ca21chrR_C_albicans_SC5314	1412509	G	T	25	11	1	27								UPSTREAM:orf19.695-P	6	HOM
Ca21chr4_C_albicans_SC5314	481493	A	G	52	26	4	27								UPSTREAM:orf19.2760-P	10	HOM
Ca21chr4_C_albicans_SC5314	338147	A	G	34	17	1	15								UPSTREAM:orf19.4623.3-P	13	HOM
Ca21chrR_C_albicans_SC5314	980155	A	C	57	27	4	24								UPSTREAM:orf19.532-P	16	HOM
Ca21chr1_C_albicans_SC5314	1683584	C	T	20	1	0	5	HOK-1;MRS-1;Ca3-1		CA3	repeat_region;repeat_region;repeat_region	Repeat sequence of about 8 kb, part of the Major Repeat Sequence (MRS) on Chromosome 1; MRS units are found on most chromosomes; may serve as recombination hotspots;Major Repeat Sequence (MRS) on Chromosome 1; MRS units are composed of variable numbers of RPS units flanked by HOK and RB2 sequences; found on most chromosomes; may serve as recombination hot spot;Ca3 region on Chromosome 1; Ca3 is a…			UPSTREAM:orf19.1233-P	22	HOM
Ca21chrR_C_albicans_SC5314	1787883	G	T	61	32	0	44								UPSTREAM:orf19.6385-P	46	HOM
Ca21chrR_C_albicans_SC5314	1787884	T	C	60	32	0	45								UPSTREAM:orf19.6385-P	46	HOM
Ca21chrR_C_albicans_SC5314	1788779	G	A	56	29	0	37								UPSTREAM:orf19.6385-P	46	HOM
Ca21chrR_C_albicans_SC5314	1788890	C	T	50	20	1	18								UPSTREAM:orf19.6385-P	46	HOM
Ca21chrR_C_albicans_SC5314	1788896	C	T	53	15	0	21								UPSTREAM:orf19.6385-P	46	HOM
Ca21chrR_C_albicans_SC5314	1788913	T	C	62	30	0	25								UPSTREAM:orf19.6385-P	46	HOM
Ca21chr1_C_albicans_SC5314	4061	G	C	123	133	30	61	orf19.6115		orf19.13534|IPF21113.1|IPF27828.1|CaO19.11880|CaO19.4402|CaO19.6115|CaO19.13534	ORF|Dubious		M1I	G2C	orf19.6115-P	1	NOISE
Ca21chr1_C_albicans_SC5314	11050	A	G	121	10	82	9	orf19.6112	CTA2	orf19.13531|IPF21081.1|IPF10779.1|orf6.6229|CA3851|CTA21|TLO3|CTA210|CaO19.6112|CaO19.13531	ORF|Verified	Putative transcriptional activator, activates transcription in 1-hybrid assay in S. cerevisiae; downregulated by Efg1p; member of a family of telomere-proximal genes; transcription is positively regulated by Tbf1p	E111E	A332G	orf19.6112-P	1	NOISE
Ca21chr1_C_albicans_SC5314	15603	T	G	79	3	38	6	orf19.6102;orf19.6103		orf19.13521|IPF21080.1|IPF4649.1|Contig4-2342_0004|orf6.6239|CA3854|CaO19.6102|CST6|CaO19.13521|IPF4649;orf19.13522|IPF21098.1|IPF4645.1|Contig4-2342_0005|orf6.6238|CA3855|CaO19.6103|CaO19.13522|IPF4645	ORF|Verified;ORF|Uncharacterized	Putative bZIP domain-containing protein of the ATF/CREB family; null mutant is viable but slow-growing and displays abnormal colony morphology and invasive growth;S. cerevisiae ortholog SPO73 has role in ascospore wall assembly and localizes to cytosol	G3G;F53L	T8G;T158G	orf19.6103-P;orf19.6102-P	1	NOISE
Ca21chr1_C_albicans_SC5314	21287	A	G	132	0	60	8	orf19.6094		orf19.13513|IPF21026.1|IPF4632.2|Contig4-2998_0005|orf6.6247|CA3859|VPS53|CaO19.6094|CaO19.13513|IPF4632	ORF|Uncharacterized	S. cerevisiae ortholog VPS53 has role in retrograde transport, endosome to Golgi, Golgi to vacuole transport and localizes to GARP complex	Y143C	A427G	orf19.6094-P	1	NOISE
Ca21chr1_C_albicans_SC5314	47865	T	G	90	3	41	7	orf19.6077		orf19.13498|IPF8369.2|IPF27822.1|Contig4-2396_0004|orf6.7621|CA4936|CaO19.13498|CaO19.6077|IPF8369	ORF|Uncharacterized	Putative protein of unknown function; shows colony morphology-related gene regulation by Ssn6p	G354G	T1061G	orf19.6077-P	1	NOISE
Ca21chr1_C_albicans_SC5314	75074	T	G	143	0	50	8	orf19.6061		orf19.13482|IPF21059.1|IPF1416.1|Contig4-2977_0004|orf6.7605|CA4921|FMP30|CaO19.13482|CaO19.6061|IPF1416	ORF|Uncharacterized	S. cerevisiae ortholog FMP30 has role in N-acylethanolamine metabolic process, N-acylphosphatidylethanolamine metabolic process and localizes to mitochondrion	P103P	T308G	orf19.6061-P	1	NOISE
Ca21chr1_C_albicans_SC5314	137271	A	T	55	3	27	6								UPSTREAM:orf19.6029-P	1	NOISE
Ca21chr1_C_albicans_SC5314	150810	G	A	175	6	64	9	orf19.6027		orf19.13448|IPF18867.2|IPF7903.2|Contig4-2833_0014|orf6.1968|orf6.3931|CA2155|CaO19.6027|IPF7903	ORF|Uncharacterized		G66D	G196A	orf19.6027-P	1	NOISE
Ca21chr1_C_albicans_SC5314	158517	A	T	131	0	11	4								UPSTREAM:orf19.6023-P	1	NOISE
Ca21chr1_C_albicans_SC5314	162204	T	G	103	8	29	6	orf19.6022		orf19.13443|IPF21044.1|IPF19940.1|Contig4-2810_0001|Contig4-2810_0002|Contig4-2833_0019|orf6.3926|CA2150|CaO19.13443|CaO19.6022|IPF19940	ORF|Uncharacterized	Predicted ORF in Assemblies 19, 20 and 21; downregulated during core stress response	I158S	T472G	orf19.6022-P	1	NOISE
Ca21chr1_C_albicans_SC5314	247033	T	G	149	0	72	8	orf19.3310		orf19.10820|IPF23950.1|IPF5756.1|Contig4-2978_0006|orf6.7205|CA4619|CaO19.3310|CaO19.10820|IPF5756	ORF|Uncharacterized	Hap43p-repressed gene	P130P	T389G	orf19.3310-P	1	NOISE
Ca21chr1_C_albicans_SC5314	249458	T	C	142	0	47	7	orf19.3311	IFD3	orf19.10821|IPF23944.1|IPF5754.1|Contig4-2978_0008|orf6.7206|CA4620|CaO19.3311|CaO19.10821	ORF|Uncharacterized	Transcription is regulated by Mig1p	Y212H	T633C	orf19.3311-P	1	NOISE
Ca21chr1_C_albicans_SC5314	272301	T	G	103	0	25	5								UPSTREAM:orf19.3327-P	1	NOISE
Ca21chr1_C_albicans_SC5314	289137	C	T	74	81	37	74	orf19.3333		orf19.10844|IPF23938.1|IPF14410.1|Contig4-2144_0005|orf6.3340|CA1714|CaO19.10844|NAB2|CaO19.3333	ORF|Uncharacterized	S. cerevisiae ortholog NAB2 has poly(A) RNA binding, has role in regulation of mRNA stability, mRNA polyadenylation, poly(A)+ mRNA export from nucleus and localizes to cytoplasm, nucleus	V364V	C1091T	orf19.3333-P	1	NOISE
Ca21chr1_C_albicans_SC5314	294845	A	C	128	0	34	11								UPSTREAM:orf19.3336-P	1	NOISE
Ca21chr1_C_albicans_SC5314	300211	G	A	70	76	24	55	orf19.3337		orf19.10847|IPF17935.2|orf6.188|CA6275|CaO19.3337|IPF7374.5f	ORF|Uncharacterized	Late-stage biofilm-induced gene	S195S	G584A	orf19.3337-P	1	NOISE
Ca21chr1_C_albicans_SC5314	342506	T	G	156	1	31	6								UPSTREAM:orf19.3357-P	1	NOISE
Ca21chr1_C_albicans_SC5314	359586	T	C	26	43	2	18								UPSTREAM:orf19.4550-P	1	NOISE
Ca21chr1_C_albicans_SC5314	428798	C	T	49	58	10	33	orf19.3664	HSP31	orf19.11148|IPF12039.2|IPF11340.3|Contig4-1615_0002|Contig4-1615_0004|orf6.6475|CA4034|CaO19.3664	ORF|Uncharacterized	Putative 30 kda heat shock protein; repressed during the mating process	T311T	C932T	orf19.3664-P	1	NOISE
Ca21chr1_C_albicans_SC5314	433200	T	G	183	2	47	7	orf19.3667		orf19.11151|IPF23592.1|IPF12044.2|Contig4-3059_0005|orf6.6478|CA4037|CaO19.3667|KIP99|CaO19.11151|KIP31	ORF|Uncharacterized		V318G	T952G	orf19.3667-P	1	NOISE
Ca21chr1_C_albicans_SC5314	434675	T	G	125	0	63	8	orf19.3668	HGT2	orf19.11152|RGT2|IPF23590.1|IPF5315.2|Contig4-3059_0006|orf6.6479|CA4038|CaO19.3668|CaO19.11152|HGT12	ORF|Verified	Putative glucose transporter of the major facilitator superfamily; the C. albicans glucose transporter family comprises 20 members; 12 probable membrane-spanning segments; expressed in rich medium with 2% glucose	V466V	T1397G	orf19.3668-P	1	NOISE
Ca21chr1_C_albicans_SC5314	514107	T	G	103	2	35	7								UPSTREAM:orf19.2929-P	1	NOISE
Ca21chr1_C_albicans_SC5314	592289	T	G	154	6	43	8	orf19.2970	LYS2	orf19.10487|IPF17598.2|IPF19710.1|Contig4-1985_0002|orf6.2119|orf6.240|orf6.5719|CA0916|CaO19.2970	ORF|Verified	Large subunit of heterodimeric alpha-aminoadipate reductase; enzyme of lysine biosynthesis; contains predicted binding sites for AMP and alpha-aminoadipate; feedback inhibited by lysine or thialysine; regulated by Gcn2p and Gcn4p	G1110G	T3329G	orf19.2970-P	1	NOISE
Ca21chr1_C_albicans_SC5314	608920	T	C	85	64	17	42	orf19.2980		orf19.10497|IPF24259.1|IPF11323.2|Contig4-2816_0011|orf6.5709|CA3444|CaO19.10497|TIP39|CaO19.2980|IPF11323	ORF|Uncharacterized		I376T	T1126C	orf19.2980-P	1	NOISE
Ca21chr1_C_albicans_SC5314	622463	T	G	112	0	57	9	orf19.2990	XOG1	orf19.10507|EXG|EXG1|IPF24307.1|IPF14073.2|Contig4-2184_0004|orf6.1982|CA0822|CaO19.2990	ORF|Verified	Exo-1,3-beta-glucanase; member of a 5 glycosyl hydrolase family; affects sensitivity to inhibitors of chitin and glucan synthesis; not required for yeast-to-hyphal transition or for virulence in mouse systemic infection; Hap43p-induced gene	S379A	T1134G	orf19.2990-P	1	NOISE
Ca21chr1_C_albicans_SC5314	658522	A	C	162	2	45	7	orf19.3008	COQ4	orf19.10526|IPF24323.1|IPF5361.2|Contig4-3096_0016|orf6.5281|CA3118|CaO19.3008|CaO19.10526	ORF|Uncharacterized	Protein with a putative role in coenzyme Q biosynthesis; transcriptionally induced by interaction with macrophage; Hap43p-repressed gene	G29G	A86C	orf19.3008-P	1	NOISE
Ca21chr1_C_albicans_SC5314	673655	A	C	128	0	38	7	orf19.3013	CDC12	orf19.10531|IPF24312.1|IPF3714.2|Contig4-3096_0035|orf6.7750|CA5049|IPF3714	ORF|Verified	Septin; essential for viability; gene has predicted splice sites; forms ring at sites of cell division and also forms filaments in mature chlamydospore; filamentous growth induced; regulated by Nrg1p, Tup1p, tyrosol and cell density	G31G	A92C	orf19.3013-P	1	NOISE
Ca21chr1_C_albicans_SC5314	705315	A	C	115	0	72	15	orf19.3035		orf19.10553|IPF24378.1|IPF8489.2|Contig4-3098_0051|orf6.7772|CA5064|CaO19.10553|CHD1|CaO19.3035	ORF|Uncharacterized	S. cerevisiae ortholog CHD1 has role in RNA elongation from RNA polymerase II promoter, chromatin remodeling, positive regulation of transcription from RNA polymerase II promoter, nucleosome positioning	N1177T	A3529C	orf19.3035-P	1	NOISE
Ca21chr1_C_albicans_SC5314	751797	A	G	70	57	10	31	orf19.3061.1		orf19.3061.2|CA5086|RPS22B|CA5085|RPS22.exon2|IPF9280.2	ORF|Uncharacterized	Ortholog of S. cerevisiae Rps22Ap and Rps22Bp; gene contains 5' UTR intron	Intronic	Intronic	orf19.3061.1-P	1	NOISE
Ca21chr1_C_albicans_SC5314	773850	A	G	71	76	14	34								UPSTREAM:orf19.1133-P	1	NOISE
Ca21chr1_C_albicans_SC5314	798223	C	T	81	86	12	31								UPSTREAM:orf19.1030-P	1	NOISE
Ca21chr1_C_albicans_SC5314	819448	T	A	122	9	46	6								UPSTREAM:orf19.4459-P	1	NOISE
Ca21chr1_C_albicans_SC5314	821286	T	A	56	39	5	22	orf19.4461		orf19.11941|IPF22784.1|IPF28385.1|orf6.2028|CaO19.4461|CaO19.11941	ORF|Uncharacterized		F19L	T56A	orf19.4461-P	1	NOISE
Ca21chr1_C_albicans_SC5314	822226	T	C	62	54	20	47								UPSTREAM:orf19.4461-P	1	NOISE
Ca21chr1_C_albicans_SC5314	837763	A	T	62	77	11	35	orf19.4472		orf19.11952|IPF22785.1|IPF28386.1|orf6.4315|CaO19.4472|CaO19.11952	ORF|Dubious		I82F	A243T	orf19.4472-P	1	NOISE
Ca21chr1_C_albicans_SC5314	853687	T	C	43	43	12	31								UPSTREAM:orf19.4482-P	1	NOISE
Ca21chr1_C_albicans_SC5314	856151	A	G	66	69	11	29	orf19.1039		orf19.8641|IPF17890.1|IPF29595.1|Contig4-2664_0010|orf6.2318|CA1034|BET4.3f|BET4.exon2	ORF|Uncharacterized	S. cerevisiae ortholog BET4 has Rab geranylgeranyltransferase activity and has role in protein geranylgeranylation, protein targeting to membrane, ER to Golgi vesicle-mediated transport	K296K	A887G	orf19.1039-P	1	NOISE
Ca21chr1_C_albicans_SC5314	920715	T	G	120	7	40	6	orf19.6840		orf19.14130|IPF20288.1|IPF3535.2|Contig4-3051_0005|orf6.6989|CA4443|CaO19.14130|CaO19.6840|IPF3535	ORF|Uncharacterized	Early-stage biofilm-induced gene; transcription is induced in response to alpha pheromone in SpiderM medium; transcription detected in high-resolution tiling array experiments	P13P	T38G	orf19.6840-P	1	NOISE
Ca21chr1_C_albicans_SC5314	921323	C	A	161	0	47	8								UPSTREAM:orf19.6840-P	1	NOISE
Ca21chr1_C_albicans_SC5314	963240	T	G	130	0	41	8	orf19.781		orf19.8403|IPF26516.1|IPF10804.2|Contig4-2404_0008|orf6.4115|DUR3|CA2279|CaO19.8403|DUR31|CaO19.781	ORF|Verified	Major urea transporter; expression is induced by urea; fungal-specific (no human or murine homolog); not required for virulence in a mouse intravenous model	F414V	T1239G	orf19.781-P	1	NOISE
Ca21chr1_C_albicans_SC5314	970776	T	G	117	0	32	6								UPSTREAM:orf19.779-P	1	NOISE
Ca21chr1_C_albicans_SC5314	1049863	T	G	137	0	42	6	orf19.54	RHD1	orf19.7715|IPF27198.1|IPF13148.2|Contig4-2469_0001|orf6.4552|CA2597|BMT2|WRY7|CaO19.7715|CaO19.54|IFQ3	ORF|Verified	Putative beta-mannosyltransferase, required for the addition of beta-mannose to the acid-labile fraction of cell wall phosphopeptidomannan; member of a 9-gene family; transcriptionally regulated on yeast-hyphal and white-opaque switches	C498W	T1493G	orf19.54-P	1	NOISE
Ca21chr1_C_albicans_SC5314	1077976	T	G	140	0	47	9								UPSTREAM:orf19.4056-P	1	NOISE
Ca21chr1_C_albicans_SC5314	1089552	T	G	139	0	43	7								UPSTREAM:orf19.450-P	1	NOISE
Ca21chr1_C_albicans_SC5314	1099903	G	A	120	7	58	9	orf19.446		orf19.8076|IPF26878.1|IPF5922.2|Contig4-2840_0009|orf6.6515|CA4068|CaO19.446|CaO19.8076|IPF5922	ORF|Uncharacterized	Predicted ORF in Assemblies 19, 20 and 21; constitutive expression independent of MTL or white-opaque status; greater mRNA abundance observed in a cyr1 homozygous null mutant than in wild type	Q99Q	G296A	orf19.446-P	1	NOISE
Ca21chr1_C_albicans_SC5314	1110984	C	T	53	72	10	29								UPSTREAM:orf19.437-P	1	NOISE
Ca21chr1_C_albicans_SC5314	1158215	G	A	59	0	17	4								UPSTREAM:orf19.413-P	1	NOISE
Ca21chr1_C_albicans_SC5314	1183881	T	C	90	74	12	31	orf19.2485		orf19.10021|IPF24880.1|IPF9224.2|Contig4-2966_0010|Contig4-2966_0011|orf6.6166|CA3806|CaO19.2485|NUP170|CaO19.10021|IPF9224	ORF|Uncharacterized	S. cerevisiae ortholog NUP170 has role in protein import into nucleus, docking, protein targeting to membrane, nuclear pore complex assembly, chromosome segregation and localizes to karyopherin docking complex	Y1256H	T3765C	orf19.2485-P	1	NOISE
Ca21chr1_C_albicans_SC5314	1229237	A	C	131	0	30	8	orf19.2459		orf19.9996|IPF24817.1|IPF6700.2|Contig4-2709_0005|orf6.3561|CA1872|CaO19.2459|CaO19.9996|IPF6700	ORF|Uncharacterized	Protein of unknown function; mRNA binds to She3p; Hap43p-repressed gene	K834N	A2501C	orf19.2459-P	1	NOISE
Ca21chr1_C_albicans_SC5314	1242809	G	A	84	4	38	9								UPSTREAM:orf19.2455-P	1	NOISE
Ca21chr1_C_albicans_SC5314	1244661	C	G	102	0	28	6								UPSTREAM:orf19.2454-P	1	NOISE
Ca21chr1_C_albicans_SC5314	1250906	T	C	151	6	45	6								UPSTREAM:orf19.2451-P	1	NOISE
Ca21chr1_C_albicans_SC5314	1293498	A	G	28	40	23	56	orf19.2661;orf19.2662	TLO34	IPF11534.1|IPF17380.2|Contig4-1945_0002|Contig4-2584_0004|Contig4-2753_0010|Contig4-2898_0012|Contig4-2956_0007|orf6.334|orf6.434|orf6.1466|CA0498|CA0078|orf19.631|orf19.381|CaO19.2661|CTA218|CTA211.3f;IPF11536.1|orf6.1467|CaO19.2662|ATC218	ORF|Uncharacterized;ORF|Uncharacterized	Non-telomeric member of a family of telomere-proximal genes of unknown function; predicted N-terminus is extended, relative to that of other family members; overlaps orf19.2662;Predicted ORF in Assemblies 19, 20 and 21; overlaps TLO34/orf19.2661	A60A;K210K	A179G;A629G	orf19.2662-P;orf19.2661-P	1	NOISE
Ca21chr1_C_albicans_SC5314	1293711	A	C	75	0	29	5	orf19.2661	TLO34	IPF11534.1|IPF17380.2|Contig4-1945_0002|Contig4-2584_0004|Contig4-2753_0010|Contig4-2898_0012|Contig4-2956_0007|orf6.334|orf6.434|orf6.1466|CA0498|CA0078|orf19.631|orf19.381|CaO19.2661|CTA218|CTA211.3f	ORF|Uncharacterized	Non-telomeric member of a family of telomere-proximal genes of unknown function; predicted N-terminus is extended, relative to that of other family members; overlaps orf19.2662	V281V	A842C	orf19.2661-P	1	NOISE
Ca21chr1_C_albicans_SC5314	1341757	T	G	128	3	44	8								UPSTREAM:orf19.6277-P	1	NOISE
Ca21chr1_C_albicans_SC5314	1349435	A	T	155	3	49	7								UPSTREAM:orf19.6276-P	1	NOISE
Ca21chr1_C_albicans_SC5314	1358810	C	A	90	7	33	10								UPSTREAM:orf19.6272-P	1	NOISE
Ca21chr1_C_albicans_SC5314	1384685	A	C	132	4	23	6	orf19.6261	BPH1	orf19.13640|IPF20927.1|IPF19723.1|Contig4-2747_0021|orf6.111|orf6.2456|orf6.301|CA1123|CaO19.6261|IPF19723	ORF|Uncharacterized	Protein not essential for viability; similar to S. cerevisiae Bph1p, which is a putative ortholog of human Chediak-Higashi syndrome protein and murine beige gene implicated in disease syndromes involving defective lysosomal trafficking	G1678G	A5033C	orf19.6261-P	1	NOISE
Ca21chr1_C_albicans_SC5314	1394919	A	G	50	67	11	32								UPSTREAM:orf19.6260-P	1	NOISE
Ca21chr1_C_albicans_SC5314	1397780	T	C	67	4	11	4								UPSTREAM:orf19.6257-P	1	NOISE
Ca21chr1_C_albicans_SC5314	1422932	T	C	127	3	26	5								UPSTREAM:orf19.6245-P	1	NOISE
Ca21chr1_C_albicans_SC5314	1426967	C	G	112	5	49	7	orf19.6244		orf19.13622|IPF9146.2|IPF18817.2|Contig4-2635_0006|orf6.2196|orf6.672|orf6.984|CA0251|IFH1|CaO19.6244|IPF9146	ORF|Uncharacterized		G524G	C1571G	orf19.6244-P	1	NOISE
Ca21chr1_C_albicans_SC5314	1429341	C	T	71	66	12	31	orf19.6243	VPS34	orf19.13621|IPF17928.3|IPF17276.2|Contig4-2635_0002|Contig4-2635_0003|orf6.5115|orf6.673|orf6.983|CA0149|CaO19.6243	ORF|Verified	Autophosphorylated class III phosphatidylinositol 3-kinase, required for normal vesicle transport, hyphal growth, fibroblast adherence, virulence in mouse systemic infection; growth-regulated; caspofungin and hydrogen peroxide sensitivity	S458S	C1373T	orf19.6243-P	1	NOISE
Ca21chr1_C_albicans_SC5314	1432987	G	T	28	103	0	41								UPSTREAM:orf19.6240-P	1	NOISE
Ca21chr1_C_albicans_SC5314	1439914	A	G	61	52	7	24								UPSTREAM:orf19.6237-P	1	NOISE
Ca21chr1_C_albicans_SC5314	1453732	T	C	59	57	22	54	orf19.6229	CAT1	orf19.13609|CCT1|CCT|orf6.5127|CTA1|IPF20907.1|IPF20124.1|Contig4-1984_0001|Contig4-2906_0020|CA3011|CaO19.13609|CaO19.6229	ORF|Verified	Catalase; resistance to oxidative stress, neutrophils, peroxide; role in virulence; regulated by iron, ciclopirox, fluconazole, carbon source, pH, Rim101p, Ssn6p, Hog1p, Hap43p, farnesol, core stress response; stationary phase-enriched	D106D	T317C	orf19.6229-P	1	NOISE
Ca21chr1_C_albicans_SC5314	1481105	T	G	183	0	75	10	orf19.6214	ATC1	orf19.13595|IPF19760|ATH1|IPF20966.1|IPF19760.1|Contig4-1596_0001|Contig4-2632_0007|orf6.4526|CA2574|CaO19.6214|CaO19.13595	ORF|Verified	Cell wall acid trehalase; catalyzes hydrolysis of the disaccharide trehalose; similar to S. cerevisiae vacuolar acid trehalase (Ath1p); Hap43p-repressed gene	S649A	T1944G	orf19.6214-P	1	NOISE
Ca21chr1_C_albicans_SC5314	1529507	G	T	117	0	56	9	orf19.4455		orf19.11935|IPF22807.1|IPF6542.1|Contig4-1998_0002|orf6.7268|CA4666|CaO19.4455|CaO19.11935|IPF6542	ORF|Uncharacterized		R440S	G1319T	orf19.4455-P	1	NOISE
Ca21chr1_C_albicans_SC5314	1615096	C	T	49	109	14	38								UPSTREAM:orf19.4426-P	1	NOISE
Ca21chr1_C_albicans_SC5314	1633019	A	G	68	5	73	21	orf19.2791	BBC1	orf19.10309|IPF7255.2|IPF11796.1|Contig4-2483_0003|Contig4-2693_0010|orf6.3608|orf6.3610|orf6.3720|CA2000|CaO19.2791|IPF11796	ORF|Uncharacterized	Putative SH3-domain-containing protein	T582A	A1743G	orf19.2791-P	1	NOISE
Ca21chr1_C_albicans_SC5314	1645559	T	A	82	54	15	37								UPSTREAM:orf19.2785-P	1	NOISE
Ca21chr1_C_albicans_SC5314	1662846	A	C	101	4	16	4								UPSTREAM:orf19.1227-P	1	NOISE
Ca21chr1_C_albicans_SC5314	1669311	T	C	122	9	33	5								UPSTREAM:orf19.2781-P	1	NOISE
Ca21chr1_C_albicans_SC5314	1730158	A	T	179	14	74	9	orf19.5066		orf19.12532|IPF22148.1|IPF15607.1|Contig4-2050_0001|orf6.1521|CA0534|CaO19.12532|CaO19.5066|IPF15607	ORF|Uncharacterized	Putative pre-60S pre-ribosomal particle subunit; essential gene; S. cerevisiae ortholog RRP17 is essential; Hap43p-induced	E115D	A344T	orf19.5066-P	1	NOISE
Ca21chr1_C_albicans_SC5314	1747300	C	T	145	0	34	6								UPSTREAM:orf19.5071-P	1	NOISE
Ca21chr1_C_albicans_SC5314	1781297	A	C	131	0	51	8	orf19.5094	BUL1	orf19.12560|IPF22119.1|IPF12963.2|Contig4-2641_0004|Contig4-2641_0005|orf6.6282|CA3886|BUL5|CaO19.12560|CaO19.5094|IPF12963	ORF|Uncharacterized	Protein not essential for viability; macrophage/pseudohyphal-induced; similar to S. cerevisiae Bul1p, which may be involved in selection of substrates for ubiquitination	D556A	A1666C	orf19.5094-P	1	NOISE
Ca21chr1_C_albicans_SC5314	1793003	C	G	134	0	72	8	orf19.5097	CAT8	orf19.12563|IPF9674.2|IPF28167.1|Contig4-2662_0002|Contig4-2662_0003|orf6.4032|CaO19.5097|CaO19.12563|CA2219	ORF|Verified	Predicted zinc-cluster protein; null mutant shows a defect in transcription of JEN1 lactate permease gene; flucytosine repressed; similar to S. cerevisiae Cat8p but mutant phenotype suggests that it has a different set of target genes	P202A	C603G	orf19.5097-P	1	NOISE
Ca21chr1_C_albicans_SC5314	1803569	A	G	99	67	23	64	orf19.5101	CCR4	orf19.12567|IPF22115.1|IPF13962.2|Contig4-2297_0004|orf6.4036|CA2222|CaO19.12567|CaO19.5101	ORF|Verified	Component of the Ccr4-Pop2 mRNA deadenylase; transposon mutation affects filamentous growth	L617L	A1850G	orf19.5101-P	1	NOISE
Ca21chr1_C_albicans_SC5314	1842707	T	C	84	6	15	4	orf19.382	TEF2	orf19.8012|IPF26916.1|IPF6365.2|Contig4-3000_0020|orf6.339|TEF2-1|CaO19.382|CaO19.8012	ORF|Uncharacterized	Translation elongation factor 1-alpha; genes encoding ribosomal subunits, translation factors, and tRNA synthetases are downregulated upon phagocytosis by murine macrophage	I34I	T101C	orf19.382-P	1	NOISE
Ca21chr1_C_albicans_SC5314	1846198	A	G	109	6	40	6								UPSTREAM:orf19.384-P	1	NOISE
Ca21chr1_C_albicans_SC5314	1911544	T	A	83	73	17	40								UPSTREAM:orf19.4736-P	1	NOISE
Ca21chr1_C_albicans_SC5314	1928071	T	G	181	0	52	9	orf19.4744		orf19.12206|IPF14021.2|IPF18510.2|orf6.3656|orf6.4015|CA1949|CaO19.4744|IPF14021	ORF|Uncharacterized	Putative phosphatidylinositol 3-phosphate (PI3P) phosphatase; transcription is repressed in response to alpha pheromone in SpiderM medium	I182S	T544G	orf19.4744-P	1	NOISE
Ca21chr1_C_albicans_SC5314	1935814	T	G	84	0	14	4								UPSTREAM:orf19.4748-P	1	NOISE
Ca21chr1_C_albicans_SC5314	1940845	T	G	147	2	43	10	orf19.4752	MSN4	orf19.12215|IPF22377.1|IPF9939.2|Contig4-1898_0007|Contig4-2609_0002|orf6.4022|CA2214|CaO19.12215|CaO19.4752|IPF9939	ORF|Uncharacterized	Zinc finger transcription factor; similar to S. cerevisiae Msn4p, but not a significant stress response regulator in C. albicans; partly complements STRE-activation defect of S. cerevisiae msn2 msn4 double mutant; biofilm-induced gene	S650A	T1947G	orf19.4752-P	1	NOISE
Ca21chr1_C_albicans_SC5314	1945617	G	T	28	135	4	64								UPSTREAM:orf19.4753-P	1	NOISE
Ca21chr1_C_albicans_SC5314	1964782	C	T	111	0	20	10								UPSTREAM:orf19.4758-P	1	NOISE
Ca21chr1_C_albicans_SC5314	1976348	T	C	49	81	6	23	orf19.4764		orf19.12228|IPF22512.1|IPF10918.2|Contig4-2669_0005|orf6.4591|CA2626|PAN2|CaO19.4764|CaO19.12228	ORF|Uncharacterized	S. cerevisiae ortholog PAN2 has poly(A)-specific ribonuclease activity, has role in postreplication repair, mRNA 3'-end processing and localizes to PAN complex	Y852H	T2553C	orf19.4764-P	1	NOISE
Ca21chr1_C_albicans_SC5314	1997470	T	A	176	11	48	10	orf19.4771		orf19.12234|IPF22382.1|IPF11667.2|orf6.3982|CA2187|MNN47|CaO19.4771|CaO19.12234|IPF11667	ORF|Uncharacterized		Y245N	T732A	orf19.4771-P	1	NOISE
Ca21chr1_C_albicans_SC5314	2072300	C	T	143	0	37	6	orf19.4802	FTH1	orf19.12265|orf6.3061-1|orf6.3061-2|IPF6122.3|IPF11034.2|Contig4-3040_0016|Contig4-3040_0017|orf6.3061|orf6.5208|CA1521|CaO19.4802	ORF|Uncharacterized	Protein not essential for viability; similar to S. cerevisiae Fth1p (putative high affinity iron transporter for intravacuolar stores of iron); repressed by Sfu1p, amphotericin B, caspofungin; induced by alkaline pH, ciclopirox olamine	N390N	C1169T	orf19.4802-P	1	NOISE
Ca21chr1_C_albicans_SC5314	2100847	C	A	68	67	9	28								UPSTREAM:orf19.4818-P	1	NOISE
Ca21chr1_C_albicans_SC5314	2115390	A	G	127	0	65	10	orf19.4823	LIP6	orf19.12286|IPF22433.1|IPF11788.2|Contig4-2746_0007|orf6.7388|CA4756|CaO19.4823|CaO19.12286	ORF|Verified	Secreted lipase, member of family of lipase genes expressed differentially in response to carbon source and during infection; may have a role in nutrition and/or in creating an acidic microenvironment; induced on adherence to polystyrene	S76S	A227G	orf19.4823-P	1	NOISE
Ca21chr1_C_albicans_SC5314	2164306	T	C	99	0	73	14	tS(CGA)1		tS(CGA)1.2	tRNA|Uncharacterized	tRNA-Ser predicted by tRNAscan-SE			UPSTREAM:orf19.4855-P	1	NOISE
Ca21chr1_C_albicans_SC5314	2174243	C	A	21	109	2	40	orf19.4862		orf19.12326|IPF12255.2|IPF16153.2|Contig4-1868_0003|orf6.689|orf6.7349|CaO19.4862|CA4726|IPF12255	ORF|Uncharacterized	S. cerevisiae ortholog TVP23 has role in vesicle-mediated transport and localizes to integral to Golgi membrane	A189E	C565A	orf19.4862-P	1	NOISE
Ca21chr1_C_albicans_SC5314	2186504	A	C	146	1	56	7								UPSTREAM:orf19.4866-P	1	NOISE
Ca21chr1_C_albicans_SC5314	2205167	A	T	93	7	30	9								UPSTREAM:orf19.4873-P	1	NOISE
Ca21chr1_C_albicans_SC5314	2236080	T	A	56	4	21	5								UPSTREAM:orf19.4885-P	1	NOISE
Ca21chr1_C_albicans_SC5314	2260687	A	C	146	0	22	6	orf19.4893		orf19.12358|IPF12282|IPF22500.1|IPF12282.2|Contig4-2955_0011|Contig4-2955_0014|orf6.4229|CA2356|CaO19.12358|CaO19.4893	ORF|Uncharacterized	Protein not essential for viability	R1010R	A3029C	orf19.4893-P	1	NOISE
Ca21chr1_C_albicans_SC5314	2281051	T	G	79	71	8	27	orf19.4901		orf19.12367|IPF18850.1|Contig4-2409_0004|orf6.2024|orf6.2023|orf6.1621|CA0595|CA6292|orf19.4902|CaO19.4901|IPF8856.5f|IPF8856|IPF8856.2	ORF|Uncharacterized		L314V	T939G	orf19.4901-P	1	NOISE
Ca21chr1_C_albicans_SC5314	2314094	T	C	148	6	36	6								UPSTREAM:orf19.986-P	1	NOISE
Ca21chr1_C_albicans_SC5314	2318945	T	G	113	1	23	5	orf19.989		orf19.8604|IPF9936.2|IPF6773.2|IPF20059.1|Contig4-2262_0002|orf6.5809|orf6.1598|CA6251|CA3526|orf19.990.1|MRPS5|MRPS5.5f|MRPS5.3f	ORF|Uncharacterized	S. cerevisiae ortholog MRPS5 has structural constituent of ribosome and localizes to mitochondrial small ribosomal subunit	G203G	T608G	orf19.989-P	1	NOISE
Ca21chr1_C_albicans_SC5314	2335105	A	G	181	13	88	11	orf19.999	GCA2	IPF16527.3|IPF16526.2|Contig4-2932_0004|orf6.5798|orf6.5799|CA3518|GCA1|AMYG2.5f|AMYG2|IPF6791.2	ORF|Verified	Predicted extracellular glucoamylase, promotes biofilm matrix formation; transcript induced by ketoconazole; possibly an essential gene, disruptants not obtained by UAU1 method	E226E	A677G	orf19.999-P	1	NOISE
Ca21chr1_C_albicans_SC5314	2389079	T	G	130	0	34	6	orf19.2342	SFT2	orf19.9878|IPF25003.1|IPF8674.2|Contig4-3011_0009|orf6.4210|CA2344|SFT22|SFT21|CaO19.2342|CaO19.9878	ORF|Uncharacterized	Putative membrane protein; transcription is regulated by Mig1p	V182G	T544G	orf19.2342-P	1	NOISE
Ca21chr1_C_albicans_SC5314	2402702	G	C	145	0	33	5								UPSTREAM:orf19.2332-P	1	NOISE
Ca21chr1_C_albicans_SC5314	2422232	T	G	104	1	19	5								UPSTREAM:orf19.2317-P	1	NOISE
Ca21chr1_C_albicans_SC5314	2433840	T	G	128	0	38	6								UPSTREAM:orf19.2310.1-P	1	NOISE
Ca21chr1_C_albicans_SC5314	2462123	T	G	111	2	63	9	orf19.2296		orf19.8300|orf19.9831|IPF25023.1|IPF14282.3|IPF7715.3|IPF29744.1|Contig4-2776_0014|orf6.1793|orf6.3697|orf6.1373|CA0446|CA0706|orf19.682|CaO19.2296|IPF14282.5eoc|IPF14282|IPF14282.2	ORF|Uncharacterized	Protein with similarity to mucins; ketoconazole-induced; fluconazole-downregulated; mRNA abundance increased in a cyr1 mutant than in wild type; colony morphology-related gene regulation by Ssn6p; late-stage biofilm-induced	G1663G	T4988G	orf19.2296-P	1	NOISE
Ca21chr1_C_albicans_SC5314	2489507	T	C	107	64	17	40	orf19.669	PRM1	orf19.8286|IPF26621.1|IPF20157.1|Contig4-2322_0003|Contig4-2322_0006|orf6.6562|CA4104|CaO19.8286|CaO19.669|IPF20157	ORF|Uncharacterized	Putative membrane protein with a predicted role in membrane fusion during mating; Hap43p-repressed gene; protein induced during the mating process	G511G	T1532C	orf19.669-P	1	NOISE
Ca21chr1_C_albicans_SC5314	2504162	A	C	85	4	27	5								UPSTREAM:orf19.661-P	1	NOISE
Ca21chr1_C_albicans_SC5314	2512977	T	C	76	5	46	7								UPSTREAM:orf19.658-P	1	NOISE
Ca21chr1_C_albicans_SC5314	2530810	C	T	125	4	34	9								UPSTREAM:orf19.1169-P	1	NOISE
Ca21chr1_C_albicans_SC5314	2536892	G	T	80	6	43	7	orf19.1166	CTA3	orf19.8759|IPF26181.1|IPF7623.2|Contig4-2394_0005|Contig4-2394_0006|orf6.3443|CA1788|EDE1|USO1.3	ORF|Verified	Protein similar to S. cerevisiae Ede1p, which is involved in endocytosis; activates transcription in 1-hybrid assay in S. cerevisiae	R403L	G1207T	orf19.1166-P	1	NOISE
Ca21chr1_C_albicans_SC5314	2549214	A	C	123	0	57	7	orf19.1159		orf19.8751|IPF26162.1|IPF7616.2|Contig4-2834_0012|orf6.3134|CA1569|CYS1|CaO19.8751|CaO19.1159|IPF7616	ORF|Uncharacterized	Protein similar to A. nidulans CYSA serine O-trans-acetylase, suggesting that C. albicans uses an O-acetyl-serine (OAS) pathway of sulfur assimilation; induced upon biofilm formation	*262C	A785C	orf19.1159-P	1	NOISE
Ca21chr1_C_albicans_SC5314	2553439	A	C	114	1	46	9	orf19.1155	DPP2	orf19.8747|IPF26170.1|IPF7611.1|Contig4-2834_0007|orf6.3130|CA1566|CaO19.8747|DPP1|CaO19.1155	ORF|Uncharacterized	Protein similar to S. cerevisiae pyrophosphate phosphatase Lpp1p; possible role in farnesol biosynthesis	I49L	A144C	orf19.1155-P	1	NOISE
Ca21chr1_C_albicans_SC5314	2553715	A	C	136	0	24	7								UPSTREAM:orf19.1155-P	1	NOISE
Ca21chr1_C_albicans_SC5314	2556330	T	C	68	62	21	46	orf19.1153	GAD1	orf19.8745|IPF11712.3|IPF7609.1|Contig4-2834_0001|orf6.2779|orf6.3128|CA1564|CaO19.1153	ORF|Uncharacterized	Putative glutamate decarboxylase; alkaline, macrophage-downregulated gene; amphotericin B induced; transcriptionally activated by Mnl1p under weak acid stress; stationary phase enriched protein	I150I	T449C	orf19.1153-P	1	NOISE
Ca21chr1_C_albicans_SC5314	2649725	A	C	173	0	57	8	orf19.5253		orf19.12718|IPF21932.1|IPF2032.1|Contig4-3067_0003|orf6.7689|CA4995|CaO19.5253|CaO19.12718|IPF2032|YAK1	ORF|Uncharacterized		K342N	A1025C	orf19.5253-P	1	NOISE
Ca21chr1_C_albicans_SC5314	2670142	A	G	113	8	93	11	orf19.5241	SNT1	orf19.12706|IPF12584|IPF2015.3|IPF12584.2|Contig4-3067_0022|orf6.768|orf6.7701|CA5006|CaO19.5241	ORF|Verified	Protein similar to S. cerevisiae Snt1p, which is an NAD-independent histone deacetylase; not essential for viability; transposon mutation affects filamentous growth	S157S	A470G	orf19.5241-P	1	NOISE
Ca21chr1_C_albicans_SC5314	2676600	A	G	137	0	28	8								UPSTREAM:orf19.5238-P	1	NOISE
Ca21chr1_C_albicans_SC5314	2717767	T	G	140	1	35	6								UPSTREAM:orf19.5219-P	1	NOISE
Ca21chr1_C_albicans_SC5314	2746043	G	A	70	68	22	60	orf19.3758		orf19.11242|IPF23507.1|IPF8901.2|Contig4-2804_0004|Contig4-2804_0006|orf6.2264|CA1004|CaO19.11242|CaO19.3758|IPF8901	ORF|Uncharacterized	S. cerevisiae ortholog TMS1 localizes to vacuolar membrane	A345T	G1032A	orf19.3758-P	1	NOISE
Ca21chr1_C_albicans_SC5314	2759342	C	G	119	0	24	6								UPSTREAM:orf19.6358-P	1	NOISE
Ca21chr1_C_albicans_SC5314	2779412	A	T	49	34	13	33	orf19.6348		orf19.13704|IPF14485|IPF19117.2|IPF14485.2|Contig4-2232_0003|Contig4-2232_0005|orf6.5777|orf6.876|CA3502|CaO19.6348	ORF|Uncharacterized	Protein not essential for viability	N890I	A2668T	orf19.6348-P	1	NOISE
Ca21chr1_C_albicans_SC5314	2785910	C	G	113	8	56	12	orf19.6344	RBK1	orf19.13700|IPF20801.1|IPF15253.2|Contig4-2421_0007|orf6.5773|CA3498|CaO19.6344	ORF|Uncharacterized	S. cerevisiae ortholog RBK1 localizes to cytoplasm, nucleus	T66S	C196G	orf19.6344-P	1	NOISE
Ca21chr1_C_albicans_SC5314	2792701	A	T	12	42	0	12								UPSTREAM:orf19.6340-P	1	NOISE
Ca21chr1_C_albicans_SC5314	2798857	A	G	66	41	6	24								UPSTREAM:orf19.4914.1-P	1	NOISE
Ca21chr1_C_albicans_SC5314	2801359	C	T	109	0	46	6	orf19.4916		orf19.12382|IPF22260.1|IPF19926.1|Contig4-2257_0013|Contig4-2257_0014|Contig4-2257_0016|orf6.3295|CA6216|YFW2|CaO19.12382|CaO19.4916|IPF12669.3f	ORF|Uncharacterized	Predicted ORF in Assemblies 19, 20 and 21; transcription is induced in response to alpha pheromone in SpiderM medium	P361L	C1081T	orf19.4916-P	1	NOISE
Ca21chr1_C_albicans_SC5314	2854712	T	C	34	67	5	25								UPSTREAM:orf19.4936.1-P	1	NOISE
Ca21chr1_C_albicans_SC5314	2875165	A	C	167	0	41	6	orf19.4943	PSA2	orf19.12409|PSA1|IPF22264.1|IPF5668.1|Contig4-2994_0010|orf6.6047|CA3706|CaO19.12409|CaO19.4943	ORF|Uncharacterized	Mannose-1-phosphate guanyltransferas; macrophage-downregulated gene; stationary phase enriched protein; Hap43p-repressed gene	K296N	A887C	orf19.4943-P	1	NOISE
Ca21chr1_C_albicans_SC5314	2886820	T	G	115	2	36	6								UPSTREAM:orf19.4950-P	1	NOISE
Ca21chr1_C_albicans_SC5314	2911919	A	T	147	13	51	9	orf19.4961	STP2	orf19.12426|IPF22239.1|IPF15844.2|Contig4-1523_0002|orf6.2844|CA1372|CaO19.4961|CaO19.12426|IPF15844	ORF|Verified	Transcription factor; activates transcription of genes encoding amino acid permeases; activated via amino-acid-induced proteolytic processing (Ssy1p, Csh3p dependent); also amino-acid-regulated; required for alkalinization of growth medium	N63I	A187T	orf19.4961-P	1	NOISE
Ca21chr1_C_albicans_SC5314	2916325	C	T	6	23	0	18	orf19.4963		orf19.12428|IPF22271.1|IPF15966.2|Contig4-1682_0003|orf6.2842|CA1370|CaO19.4963|TCI1|CaO19.12428	ORF|Uncharacterized	S. cerevisiae ortholog YDR161W has role in ER-associated protein catabolic process and localizes to cytoplasm, nucleus	L395F	C1182T	orf19.4963-P	1	NOISE
Ca21chr1_C_albicans_SC5314	2916431	A	T	9	47	0	13								UPSTREAM:orf19.4964-P	1	NOISE
Ca21chr1_C_albicans_SC5314	2955761	T	C	112	0	33	6								UPSTREAM:orf19.4980-P	1	NOISE
Ca21chr1_C_albicans_SC5314	3038851	A	T	79	0	16	4								UPSTREAM:orf19.5020-P	1	NOISE
Ca21chr1_C_albicans_SC5314	3068083	T	G	125	1	44	6	orf19.5031	SSK1	orf19.12498|orf6.7978|IPF22230.1|IPF3012.2|CA5233|CaO19.12498|CaO19.5031	ORF|Verified	Response regulator of two-component system; role in oxidative stress response, cell wall biosynthesis, virulence, hyphal growth on solid media; expressed in hyphae and yeast-form cells; putative peroxisomal targeting sequence (PTS1)	Y162D	T483G	orf19.5031-P	1	NOISE
Ca21chr1_C_albicans_SC5314	3175128	T	G	103	1	99	17	orf19.7264		IPF5231.1|Contig4-2986_0017|orf6.8164|CA5378|CaO19.7264|RPN11|MPR1	ORF|Uncharacterized	S. cerevisiae ortholog RPN11 has ubiquitin-specific protease activity and has role in protein deubiquitination, peroxisome fission, mitochondrial fission, proteasomal ubiquitin-dependent protein catabolic process	V145G	T433G	orf19.7264-P	1	NOISE
Ca21chr2_C_albicans_SC5314	8609	T	G	83	0	83	13	orf19.1917		orf19.9473|IPF25402.1|IPF16243.2|orf6.1962|CA0812|CaO19.1917|AES6|CaO19.9473|IPF3348	ORF|Uncharacterized		P227P	T680G	orf19.1917-P	1	NOISE
Ca21chr2_C_albicans_SC5314	13553	G	C	74	0	24	5	orf19.1911	PGA52	orf19.9467|IPF15442.1|IPF14463.2|Contig4-2107_0004|Contig4-2832_0018|orf6.1967|orf6.799|CA0188|CaO19.1911|IPF15442	ORF|Verified	GPI-anchored cell surface protein of unknown function; Hap43p-repressed gene; fluconazole-induced; possibly an essential gene, disruptants not obtained by UAU1 method	G288A	G862C	orf19.1911-P	1	NOISE
Ca21chr2_C_albicans_SC5314	20322	A	C	73	3	49	7	orf19.2119	NDT80	orf19.9667|IPF25251.1|IPF10318.1|Contig4-2832_0009|orf6.4742|CA2727|NDT801|CaO19.2119|CaO19.9667|IPF10318	ORF|Verified	Activator of CDR1 induction by antifungal drugs; required for wild-type drug resistance; transcriptionally induced upon antifungal drug treatment; similar to S. cerevisiae Ndt80p, which is a meiosis-specific transcriptional regulator	H211P	A631C	orf19.2119-P	1	NOISE
Ca21chr2_C_albicans_SC5314	22042	T	G	81	2	27	5	orf19.2117	LEU5	orf19.9665|IPF10322.1|IPF29217.1|Contig4-2832_0008|orf6.4744|CA2728|CaO19.2117|CaO19.9665|IPF10322	ORF|Uncharacterized	Putative mitochondrial carrier protein; Hap43p-repressed gene; transcription is upregulated in both intermediate and mature biofilms	S168A	T501G	orf19.2117-P	1	NOISE
Ca21chr2_C_albicans_SC5314	27378	T	G	105	0	61	8	orf19.2113		orf19.9661|IPF25263.1|IPF10327.2|Contig4-2832_0003|orf6.4748|CA2732|CaO19.2113|PEX30|CaO19.9661|IPF10327	ORF|Verified	Putative integral peroxisomal membrane protein; Hap43p-repressed gene	S17A	T48G	orf19.2113-P	1	NOISE
Ca21chr2_C_albicans_SC5314	44107	C	T	25	81	20	49								UPSTREAM:orf19.2097-P	1	NOISE
Ca21chr2_C_albicans_SC5314	44797	T	A	41	90	7	55	orf19.2097		orf19.9644|IPF25340.1|IPF1153.2|Contig4-2564_0004|Contig4-2564_0005|Contig4-2564_0006|orf6.7458|CA4805|RAD5|CaO19.9644|CaO19.2097	ORF|Uncharacterized	S. cerevisiae ortholog RAD5 has role in postreplication repair, double-strand break repair, free ubiquitin chain polymerization, protein polyubiquitination	V170V	T509A	orf19.2097-P	1	NOISE
Ca21chr2_C_albicans_SC5314	79192	T	G	163	1	60	11	orf19.2077	ZCF9	orf19.9624|IPF25229.1|IPF1196.2|Contig4-3072_0028|orf6.7478|CA4820|CaO19.9624|CaO19.2077|IPF1196	ORF|Verified	Putative transcription factor with zinc cluster DNA-binding motif; hypersensitive to toxic ergosterol analog ECC69 and/or ECC1384	G355G	T1064G	orf19.2077-P	1	NOISE
Ca21chr2_C_albicans_SC5314	83622	T	G	128	5	63	11	orf19.2075	DFG5	orf19.9622|IPF25260.1|IPF1199.1|Contig4-3072_0022|orf6.7480|CA4822|CaO19.2075|CaO19.9622	ORF|Verified	N-linked mannoprotein of cell wall and membrane; possible signal transducer; role in hyphal growth and HWP1 induction in alkaline pH; GPI modification predicted; dfg5 dcw1 double mutant is inviable; caspofungin-induced, fungal-specific	G262G	T785G	orf19.2075-P	1	NOISE
Ca21chr2_C_albicans_SC5314	87389	T	C	122	0	44	7								UPSTREAM:orf19.2072-P	1	NOISE
Ca21chr2_C_albicans_SC5314	123915	T	G	135	0	71	9	orf19.2051		orf19.9599|IPF25219.1|IPF29223.1|IPF7466.3|Contig4-3065_0015|orf6.431|orf6.5990|CA3659|orf19.2053|IPF7466|CA0077|IPF1239|IPF1239.1	ORF|Uncharacterized		P897P	T2690G	orf19.2051-P	1	NOISE
Ca21chr2_C_albicans_SC5314	135317	A	G	174	0	33	5	orf19.2045		orf19.9593|IPF25276.1|IPF7452.1|Contig4-3065_0027|orf6.5984|CA3654|CaO19.9593|CaO19.2045|IPF7452	ORF|Uncharacterized	S. cerevisiae ortholog DGK1 has diacylglycerol kinase activity, has role in phosphatidic acid biosynthetic process and localizes to integral to endoplasmic reticulum membrane	T111A	A330G	orf19.2045-P	1	NOISE
Ca21chr2_C_albicans_SC5314	141937	C	G	111	0	26	7	orf19.2041		orf19.9589|IPF25241.1|IPF4134.2|Contig4-2863_0027|orf6.5980|CA3650|RSC4|CaO19.2041|CaO19.9589|IPF4134	ORF|Uncharacterized		P154A	C459G	orf19.2041-P	1	NOISE
Ca21chr2_C_albicans_SC5314	163144	G	T	19	52	4	29	orf19.2024		IPF25333.1|IPF29228.1|orf6.2375|orf6.1212	ORF|Dubious		V10L	G27T	orf19.2024-P	1	NOISE
Ca21chr2_C_albicans_SC5314	203189	A	G	11	54	0	22								UPSTREAM:orf19.2003-P	1	NOISE
Ca21chr2_C_albicans_SC5314	215608	A	C	131	0	44	6	orf19.1996	CHA1	orf19.9548|orf6.6363|19.9548|CHA2|IPF4749.2|IPF8165.3|IPF29220.1|Contig4-2876_0008|orf6.766|CA3945|CA6267|orf19.1997|CHA12.3f|CHA12	ORF|Verified	Similar to catabolic serine/threonine dehydratases; negatively regulated by Rim101p; expression greater in low iron; regulated on white-opaque switching; filament induced; transposon mutation affects filamentous growth; biofilm-induced	S14S	A41C	orf19.1996-P	1	NOISE
Ca21chr2_C_albicans_SC5314	237634	T	G	169	0	49	7	orf19.1441		orf19.9016|IPF25761.1|IPF14657.2|Contig4-2134_0003|orf6.1060|CA0284|CaO19.9016|CaO19.1441|IPF14657	ORF|Uncharacterized		D490E	T1469G	orf19.1441-P	1	NOISE
Ca21chr2_C_albicans_SC5314	271594	T	G	99	7	48	12								UPSTREAM:orf19.1458-P	1	NOISE
Ca21chr2_C_albicans_SC5314	277182	A	C	111	2	37	7	orf19.1462	SMP2	orf19.9037|IPF25747.1|IPF6259.2|Contig4-2555_0003|orf6.7111|CA4540|CaO19.1462|CaO19.9037	ORF|Uncharacterized	Putative Mg2+-dependent phosphatidate phosphatase; transcription is regulated by Nrg1p	N19T	A55C	orf19.1462-P	1	NOISE
Ca21chr2_C_albicans_SC5314	325917	C	G	142	13	52	8								UPSTREAM:orf19.1490-P	1	NOISE
Ca21chr2_C_albicans_SC5314	349524	T	G	114	7	45	8								UPSTREAM:orf19.1499-P	1	NOISE
Ca21chr2_C_albicans_SC5314	351469	T	C	138	0	66	13	orf19.1499	CTF1	orf19.9075|IPF25868.1|IPF15240.2|Contig4-2582_0009|orf6.3543|CA6190|CaO19.9075|CaO19.1499|IPF15240	ORF|Verified	Putative zinc-finger transcription factor, similar to A. nidulans FarA and FarB; activates genes required for fatty acid degradation; induced by oleate; null mutant displays carbon source utilization defects and slightly reduced virulence	S247P	T738C	orf19.1499-P	1	NOISE
Ca21chr2_C_albicans_SC5314	363642	A	C	99	0	32	9								UPSTREAM:orf19.1505-P	1	NOISE
Ca21chr2_C_albicans_SC5314	367155	T	G	126	6	34	6								UPSTREAM:orf19.1507-P	1	NOISE
Ca21chr2_C_albicans_SC5314	367352	G	A	15	83	6	34	orf19.1508		IPF29448.1|orf6.1306|CaO19.1508	ORF|Uncharacterized	Predicted ORF in Assemblies 19, 20 and 21; transcription detected in high-resolution tiling array experiments	P78P	G233A	orf19.1508-P	1	NOISE
Ca21chr2_C_albicans_SC5314	390762	T	G	131	7	31	5	orf19.1516		orf19.9091|IPF17697.2|IPF8246.2|Contig4-2807_0008|orf6.3397|orf6.3967|CA1752|UBP14|CaO19.1516	ORF|Uncharacterized	S. cerevisiae ortholog UBP14 has ubiquitin-specific protease activity and has role in negative regulation of gluconeogenesis, proteasomal ubiquitin-dependent protein catabolic process	Y371D	T1110G	orf19.1516-P	1	NOISE
Ca21chr2_C_albicans_SC5314	425521	A	C	160	0	40	6	orf19.1533		orf19.9108|IPF15116.1|IPF17419.2|Contig4-1607_0002|orf6.839|CA0201|CaO19.1533|IPF17419|IPF15116	ORF|Uncharacterized	Hap43p-induced gene; S. cerevisiae ortholog YKL077W localizes to fungal-type vacuole	T151P	A450C	orf19.1533-P	1	NOISE
Ca21chr2_C_albicans_SC5314	459934	T	C	32	0	9	4								UPSTREAM:orf19.1549-P	1	NOISE
Ca21chr2_C_albicans_SC5314	513522	T	C	25	112	19	66	orf19.1578		orf19.9151|IPF25824.1|IPF9638.2|Contig4-3005_0028|Contig4-3005_0029|orf6.5342|CA3165|CaO19.1578|RRP5|CaO19.9151|FMI1	ORF|Uncharacterized	Hap43p-induced gene	D1357D	T4070C	orf19.1578-P	1	NOISE
Ca21chr2_C_albicans_SC5314	525606	A	G	136	0	45	6	orf19.1586	FGR22	orf19.9159|IPF25798.1|IPF13130.2|PLC3|PLC2|Contig4-3005_0005|orf6.5334|CA3159|PLC22|CaO19.9159|CaO19.1586	ORF|Verified	Putative phosphatidylinositol-specific phospholipase C (PI-PLC); predicted type 2 membrane protein; no S. cerevisiae ortholog; role in, and regulated by, filamentation, Hap43p; almost identical to orf19.5797	L295L	A884G	orf19.1586-P	1	NOISE
Ca21chr2_C_albicans_SC5314	532070	G	A	135	2	48	11								UPSTREAM:orf19.1587-P	1	NOISE
Ca21chr2_C_albicans_SC5314	542077	C	A	119	0	34	7								UPSTREAM:orf19.5835-P	1	NOISE
Ca21chr2_C_albicans_SC5314	570081	A	C	119	2	28	5								UPSTREAM:orf19.5820-P	1	NOISE
Ca21chr2_C_albicans_SC5314	614476	A	G	143	2	73	9	orf19.5797	PLC2	orf19.13219|IPF21406.1|IPF17332.2|Contig4-3045_0004|orf6.6631|CA4152|CA6227|PLC2.5f|CaO19.5797|PLC21|CaO19.13219|PLC2.3f|PI-PLC	ORF|Verified	Phosphatidylinositol (PtdIns)-specific phospholipase C (PI-PLC); predicted type 2 membrane protein; role in, and regulated by, filamentation, Nrg1p and Tup1p; no mouse systemic virulence role; orf19.5797 and orf19.1586 are almost identical	P138P	A413G	orf19.5797-P	1	NOISE
Ca21chr2_C_albicans_SC5314	693373	A	T	130	6	38	6	orf19.894		orf19.8513|IPF26401.1|IPF3670.2|Contig4-3099_0008|Contig4-3099_0010|orf6.7283|CA4678|RGP1|CaO19.8513|CaO19.894|IPF3670	ORF|Uncharacterized		I100F	A297T	orf19.894-P	1	NOISE
Ca21chr2_C_albicans_SC5314	711100	A	C	142	0	49	8	orf19.881	DFG16	orf19.8500|IPF9013|IPF18185.2|IPF9013.2|Contig4-2772_0008|orf6.7296|CA4685|CaO19.8500|CaO19.881	ORF|Verified	Rim101p pathway protein that regulates filamentation in response to alkaline pH; required for host tissue invasion during infection; similar to S. cerevisiae Dfg16p that acts in Rim101p processing; late-stage biofilm-induced	D298A	A892C	orf19.881-P	1	NOISE
Ca21chr2_C_albicans_SC5314	713065	G	C	108	5	49	14	orf19.880		orf19.8499|IPF26508.1|IPF9015.2|Contig4-2772_0004|Contig4-2772_0005|orf6.7297|CA4686|CaO19.880|SFB3|CaO19.8499|IPF9015	ORF|Uncharacterized	S. cerevisiae ortholog SFB3 has role in cargo loading into COPII-coated vesicle and localizes to COPII vesicle coat, mating projection tip	S98S	G293C	orf19.880-P	1	NOISE
Ca21chr2_C_albicans_SC5314	722293	A	G	144	0	42	7	orf19.874		orf19.8493|IPF26430.1|IPF3958.1|Contig4-2937_0005|orf6.7303|CA4691|CaO19.874|CaO19.8493|IPF3958	ORF|Uncharacterized	Hap43p-repressed gene	T301A	A900G	orf19.874-P	1	NOISE
Ca21chr2_C_albicans_SC5314	779941	C	T	96	8	25	6								UPSTREAM:orf19.851-P	1	NOISE
Ca21chr2_C_albicans_SC5314	784240	C	A	31	104	11	32								UPSTREAM:orf19.849-P	1	NOISE
Ca21chr2_C_albicans_SC5314	798396	T	G	18	98	3	49								UPSTREAM:orf19.844-P	1	NOISE
Ca21chr2_C_albicans_SC5314	831094	T	G	129	1	46	6	orf19.828		orf19.8448|IPF26441.1|IPF8752.2|Contig4-2913_0009|orf6.6719|CA4226|MRPL24|CaO19.8448|CaO19.828|IPF8752	ORF|Uncharacterized	Putative ribosomal protein, large subunit, mitochondrial precursor; decreased expression in response to prostaglandins	G193G	T578G	orf19.828-P	1	NOISE
Ca21chr2_C_albicans_SC5314	856425	T	C	101	1	52	15	orf19.814	SSY1	orf19.8434|CSY1|IPF5802.2|IPF29641.1|IPF29694.1|Contig4-2714_0007|orf6.6705|SSY1.5|CA4215|orf19.814.3|CaO19.814	ORF|Verified	Amino acid sensor, required for wild-type hyphal growth on solid serum or Lees media, not for hyphal growth under all conditions; 12 predicted membrane spanning regions; Hap43p-repressed gene	G335G	T1004C	orf19.814-P	1	NOISE
Ca21chr2_C_albicans_SC5314	863944	A	T	210	1	54	8								UPSTREAM:orf19.810-P	1	NOISE
Ca21chr2_C_albicans_SC5314	877399	G	C	100	0	25	12	orf19.804		orf19.8422|IPF26439.1|IPF5064.2|Contig4-2544_0004|orf6.2547|CA1179|CaO19.804|CaO19.8422|IPF5064	ORF|Uncharacterized	S. cerevisiae ortholog YPR011C localizes to mitochondrion	G268G	G803C	orf19.804-P	1	NOISE
Ca21chr2_C_albicans_SC5314	884303	T	C	16	73	1	27								UPSTREAM:orf19.799-P	1	NOISE
Ca21chr2_C_albicans_SC5314	917105	T	G	167	2	67	9	orf19.4516		orf19.11991|IPF11207.3|IPF11419.2|Contig4-2521_0008|orf6.391|orf6.4995|CA2911|MET7|CaO19.4516	ORF|Uncharacterized	S. cerevisiae ortholog MET7 has tetrahydrofolylpolyglutamate synthase activity, has role in one-carbon metabolic process and localizes to mitochondrion	N201K	T602G	orf19.4516-P	1	NOISE
Ca21chr2_C_albicans_SC5314	940730	A	C	132	0	30	6								UPSTREAM:orf19.4502-P	1	NOISE
Ca21chr2_C_albicans_SC5314	969558	G	C	123	0	14	4	iota-2a		iota	long_terminal_repeat	Long terminal repeat (LTR); about 251 bp long, 13 copies per genome			UPSTREAM:orf19.4490-P	1	NOISE
Ca21chr2_C_albicans_SC5314	977310	T	C	68	5	22	5	orf19.147	YAK1	orf19.7787|orf19.7788|IPF27150.1|IPF16042.2|IPF16043.2|IPF19456.2|orf6.1179|orf6.63|orf6.1180|CA0353|CA0354|orf19.148|YAK1.3f	ORF|Verified	Predicted serine-threonine protein kinase involved in hyphal growth regulation and biofilm formation; biofilm-induced; induced in core caspofungin response	Y675H	T2022C	orf19.147-P	1	NOISE
Ca21chr2_C_albicans_SC5314	1022480	C	G	151	0	60	8								UPSTREAM:orf19.4123-P	1	NOISE
Ca21chr2_C_albicans_SC5314	1040959	G	A	159	3	32	14	orf19.3531		orf19.11015|IPF23736.1|IPF4466.2|Contig4-2446_0002|orf6.1499|CA0520|CaO19.3531|CaO19.11015|IPF4466	ORF|Uncharacterized		K254K	G761A	orf19.3531-P	1	NOISE
Ca21chr2_C_albicans_SC5314	1120968	T	G	132	3	42	7	orf19.3577	COQ5	orf19.11061|IPF23735.1|IPF3222.1|Contig4-3023_0001|orf6.5752|CA3482|CaO19.3577|CaO19.11061	ORF|Verified	Putative methyltransferase of ubiquinone biosynthesis; regulated by Gcn4p; repressed in response to amino acid starvation (3-AT); Hap43p-repressed; induced upon adherence to polystyrene	G117G	T350G	orf19.3577-P	1	NOISE
Ca21chr2_C_albicans_SC5314	1127937	G	A	25	146	12	83	orf19.6866		orf19.14156|IPF8044|IPF20238.1|IPF8044.2|Contig4-3086_0001|orf6.7130|CA4556|U1-70K	ORF|Uncharacterized	Putative U1-70K component of the U1 snRNP, involved in splicing; ortholog of S. cerevisiae SNP1; downregulated upon adherence to polystyrene	Q260Q	G779A	orf19.6866-P	1	NOISE
Ca21chr2_C_albicans_SC5314	1133031	T	G	144	0	53	7								UPSTREAM:orf19.6869-P	1	NOISE
Ca21chr2_C_albicans_SC5314	1158412	A	G	8	25	6	49	orf19.6877	PNG2	orf19.14166|IPF20218.1|IPF19801.1|Contig4-3086_0035|orf6.7141|CA4566|CaO19.14166|CaO19.6877|IPF19801	ORF|Verified	Putative peptide:N-glycanase; gene contains variable numbers of 12-bp repeats; transcription upregulated by treatment with caspofungin, ciclopirox olamine, ketoconazole or hypoxia; gene of core caspofungin response; Hap43p-induced gene	K434E	A1299G	orf19.6877-P	1	NOISE
Ca21chr2_C_albicans_SC5314	1211702	A	G	119	1	18	4								UPSTREAM:orf19.5213.1-P	1	NOISE
Ca21chr2_C_albicans_SC5314	1254640	A	C	105	4	33	5	orf19.4102	RPN10	orf19.11583|IPF23155.1|IPF2104.2|Contig4-2950_0011|orf6.6834|CA4319|CaO19.11583|CaO19.4102	ORF|Uncharacterized	Putative 19S regulatory particle of the 26S proteasome; macrophage/pseudohyphal-repressed; regulated by Gcn2p and Gcn4p	G75G	A224C	orf19.4102-P	1	NOISE
Ca21chr2_C_albicans_SC5314	1270706	T	G	130	0	58	9	orf19.5486		orf19.12941|IPF21656.1|IPF10981.1|Contig4-2604_0006|orf6.4180|CA2322|CaO19.12941|YSH1|CaO19.5486	ORF|Verified	Putative endoribonuclease; heterozygous null mutant exhibits hypersensitivity to parnafungin and cordycepin in the C. albicans fitness test	V437G	T1309G	orf19.5486-P	1	NOISE
Ca21chr2_C_albicans_SC5314	1305704	T	G	150	0	42	6	orf19.20	RTS1	orf19.7691|IPF27207.1|IPF3870.2|Contig4-3047_0003|orf6.2653|CA1247|CaO19.7691|CaO19.20|IPF3870	ORF|Uncharacterized	Putative serine/threonine-protein phosphatase B-type regulatory subunit; transcription is regulated upon yeast-hyphal switch	H840Q	T2519G	orf19.20-P	1	NOISE
Ca21chr2_C_albicans_SC5314	1311902	G	A	103	0	37	6								UPSTREAM:orf19.22-P	1	NOISE
Ca21chr2_C_albicans_SC5314	1315420	A	G	155	1	44	7	orf19.23	RTA3	orf19.7694|YOR49|Contig4-3047_0020|IPF27215.1|IPF3859.1|orf6.5917|CA3606|CaO19.7694|RSB13|CaO19.23	ORF|Uncharacterized	Similar to S. cerevisiae Rta1p (role in 7-aminocholesterol resistance) and Rsb1p (flippase); putative membrane protein; putative drug-responsive regulatory site; induced by fluphenazine, estradiol, ketoconazole, caspofungin	I198V	A591G	orf19.23-P	1	NOISE
Ca21chr2_C_albicans_SC5314	1317803	T	G	131	3	48	7	orf19.24	RTA2	orf19.7695|IPF27216.1|IPF3858.1|Contig4-3047_0022|orf6.5918|CA3607|CaO19.24|RSB11|CaO19.7695	ORF|Verified	Putative flippase required for sphingolipid long chain base release; mediates calcineurin-dependent resistance to azoles; stress-associated protein; Ca2+, calcineurin-regulated; ketoconazole, caspofungin induced; Plc1p-regulated	G192G	T575G	orf19.24-P	1	NOISE
Ca21chr2_C_albicans_SC5314	1356512	T	G	70	3	14	5								UPSTREAM:orf19.81-P	1	NOISE
Ca21chr2_C_albicans_SC5314	1369697	C	A	19	43	3	35								UPSTREAM:orf19.1225-P	1	NOISE
Ca21chr2_C_albicans_SC5314	1383092	T	C	130	9	33	5								UPSTREAM:orf19.3148-P	1	NOISE
Ca21chr2_C_albicans_SC5314	1397377	A	C	118	7	27	5	orf19.2233	PRE2	orf19.9775|IPF25065.1|IPF9042.1|Contig4-2838_0012|orf6.1889|CA0764|CaO19.2233|CaO19.9775	ORF|Uncharacterized	Putative proteasome beta-5 subunit; macrophage-induced protein	G120G	A359C	orf19.2233-P	1	NOISE
Ca21chr2_C_albicans_SC5314	1447857	A	C	141	1	48	7	orf19.2265		orf19.9805|IPF25054.1|IPF11108.2|Contig4-2843_0011|orf6.5881|CA3575|CaO19.9805|SNF12|CaO19.2265|IPF11108	ORF|Uncharacterized	S. cerevisiae ortholog SNF12 has role in nucleosome mobilization and localizes to SWI/SNF complex	P14P	A41C	orf19.2265-P	1	NOISE
Ca21chr2_C_albicans_SC5314	1470447	T	A	132	9	56	13	orf19.2277	TPK2	orf19.9817|IPF25055.1|IPF10304.1|Contig4-3049_0025|Contig4-3049_0027|orf6.3564|CA1874|CaO19.2277|CaO19.9817	ORF|Verified	Catalytic subunit of cAMP-dependent protein kinase (PKA), isoform of Tpk1p; required for wild-type epithelial cell damage and engulfment and oral (not systemic) virulence in mouse; involved in control of morphogenesis and stress response	L43H	T127A	orf19.2277-P	1	NOISE
Ca21chr2_C_albicans_SC5314	1521782	T	G	74	79	19	42	orf19.1886	RCL1	orf19.9442|IPF25440.1|IPF9148.2|Contig4-2743_0006|orf6.190|orf6.7034|CA0027|CaO19.1886	ORF|Uncharacterized	Putative U3-containing 90S preribosome processome complex subunit; Hap43p-induced gene; essential; downregulated during core stress response; S. cerevisiae ortholog is essential	F314V	T939G	orf19.1886-P	1	NOISE
Ca21chr2_C_albicans_SC5314	1539148	A	C	155	2	50	9	orf19.1872		orf19.9428|IPF4045.1|IPF17566.1|Contig4-3010_0010|orf6.283|orf6.7048|CA4490|CaO19.1872|IPF4045	ORF|Verified	Plasma membrane protein; repressed by nitric oxide	K143N	A428C	orf19.1872-P	1	NOISE
Ca21chr2_C_albicans_SC5314	1557539	A	C	126	6	33	5								UPSTREAM:orf19.1862-P	1	NOISE
Ca21chr2_C_albicans_SC5314	1561798	G	T	84	3	31	8								UPSTREAM:orf19.1860.1-P	1	NOISE
Ca21chr2_C_albicans_SC5314	1576154	T	G	113	0	41	7								UPSTREAM:orf19.2209-P	1	NOISE
Ca21chr2_C_albicans_SC5314	1579032	T	G	173	0	68	9	orf19.2209	YVC1	orf19.9754|IPF25104.1|IPF5479.2|Contig4-3058_0005|orf6.3575|CA1883|CaO19.2209|CaO19.9754|IPF5479	ORF|Uncharacterized	Protein similar to S. cerevisiae Yvc1p; transcription is repressed in response to alpha pheromone in SpiderM medium	F513V	T1536G	orf19.2209-P	1	NOISE
Ca21chr2_C_albicans_SC5314	1594598	T	G	126	0	36	6								UPSTREAM:orf19.2199-P	1	NOISE
Ca21chr2_C_albicans_SC5314	1617491	A	C	94	0	32	6								UPSTREAM:orf19.2186-P	1	NOISE
Ca21chr2_C_albicans_SC5314	1644579	T	G	114	1	38	16	orf19.2174	RAD57	orf19.9720|IPF25120.1|IPF10144.2|Contig4-3057_0023|orf6.6089|CA3744|CaO19.9720|CaO19.2174	ORF|Uncharacterized	Putative DNA recombination and repair protein; transcriptionally induced by interaction with macrophage; transcription is regulated by Nrg1p, Mig1p, and Tup1p; essential protein; S. cerevisiae ortholog is essential	C114W	T341G	orf19.2174-P	1	NOISE
Ca21chr2_C_albicans_SC5314	1679272	C	A	19	84	0	13	orf19.1351		orf19.8931|IPF19017.1|IPF19081.2|orf6.1215|orf6.978|CA0366|CaO19.1351|IPF19017	ORF|Uncharacterized		I223I	C668A	orf19.1351-P	1	NOISE
Ca21chr2_C_albicans_SC5314	1689151	A	G	83	67	13	33								UPSTREAM:orf19.5121-P	1	NOISE
Ca21chr2_C_albicans_SC5314	1693224	T	C	57	63	13	33	orf19.1434		orf19.9008|IPF9733.2|IPF17695.2|Contig4-2267_0004|orf6.1038|orf6.1203|CA0272|CaO19.1434|DPB11	ORF|Uncharacterized	S. cerevisiae ortholog DPB11 has role in mitotic cell cycle G2/M transition DNA damage checkpoint, DNA replication checkpoint, double-strand break repair via break-induced replication, positive regulation of protein phosphorylation	A422A	T1265C	orf19.1434-P	1	NOISE
Ca21chr2_C_albicans_SC5314	1730347	T	G	154	2	20	8	orf19.3624		orf19.11107|IPF11991.3|IPF28720.1|Contig4-2568_0003|orf6.1481|orf6.1516|CA0508|CaO19.3624|MSU1|IPF11991|IPF11991.2	ORF|Uncharacterized	S. cerevisiae ortholog DSS1 has exoribonuclease II activity, has role in RNA catabolic process and localizes to mitochondrial matrix	N499K	T1496G	orf19.3624-P	1	NOISE
Ca21chr2_C_albicans_SC5314	1736149	G	A	100	7	33	5								UPSTREAM:orf19.3622-P	1	NOISE
Ca21chr2_C_albicans_SC5314	1751746	A	G	119	8	40	6								UPSTREAM:orf19.3616-P	1	NOISE
Ca21chr2_C_albicans_SC5314	1772820	A	C	155	1	45	7	orf19.3604		orf19.11087|IPF18810.1|IPF17166.2|orf6.2460|orf6.2223|CA0977|CaO19.3604|IPF18810	ORF|Uncharacterized		K183N	A548C	orf19.3604-P	1	NOISE
Ca21chr2_C_albicans_SC5314	1776504	G	A	133	0	72	8	orf19.3603		orf19.11086|IPF23655.1|IPF16222.2|Contig4-1896_0001|Contig4-1896_0002|orf6.2224|CA0978|CaO19.11086|CaO19.3603|IPF16222	ORF|Uncharacterized		Q638Q	G1913A	orf19.3603-P	1	NOISE
Ca21chr2_C_albicans_SC5314	1780340	A	T	108	6	45	7	orf19.3599	TIF4631	orf19.11082|IPF19840.2|IPF17394.3|eIF4G|Contig4-2333_0003|orf6.315|orf6.705|orf6.2228|CA0048|TIF46|CaO19.3599|IPF17394.2	ORF|Uncharacterized	Putative translation initiation factor eIF4G; overexpression causes hyperfilamentation; hyphal- and macrophage-induced; genes encoding some translation factors are downregulated upon phagocytosis by murine macrophage	G990G	A2969T	orf19.3599-P	1	NOISE
Ca21chr2_C_albicans_SC5314	1784696	A	G	70	51	15	36	orf19.3593	RPT6	orf19.11075|IPF13102.2|IPF18846.2|Contig4-2320_0007|Contig4-2333_0001|orf6.2051|orf6.700|CA0155|CaO19.3593	ORF|Uncharacterized	Putative ATPase of the 19S regulatory particle of the 26S proteasome; transcription is regulated by Mig1p; regulated by Gcn2p and Gcn4p	K59R	A175G	orf19.3593-P	1	NOISE
Ca21chr2_C_albicans_SC5314	1844137	A	C	112	0	65	8	orf19.203	STB3	orf19.7833|IPF27108.1|IPF9063.2|Contig4-2485_0005|Contig4-2485_0007|orf6.5935|CA3620|CaO19.7833|CaO19.203|IPF9063	ORF|Uncharacterized	Putative SIN3-binding protein 3 homolog; caspofungin induced; macrophage/pseudohyphal-repressed	S392S	A1175C	orf19.203-P	1	NOISE
Ca21chr2_C_albicans_SC5314	1866220	A	T	72	5	67	23	orf19.4072	IFF6	orf19.11553|HYR1-12|IPF19647.2|IPF28532.1|orf6.2490|orf6.3209|CA1621|HYR10|CaO19.4072|IPF19647.1	ORF|Uncharacterized	Putative GPI-anchored adhesin-like protein; opaque-specific transcription; macrophage-induced gene; Hap43p-repressed gene	S995S	A2984T	orf19.4072-P	1	NOISE
Ca21chr2_C_albicans_SC5314	1872427	T	C	73	78	15	38								UPSTREAM:orf19.4072-P	1	NOISE
Ca21chr2_C_albicans_SC5314	1887187	C	A	121	5	50	11	alpha-2a		alpha	long_terminal_repeat	Long terminal repeat (LTR) associated with the transposon Tca1; about 388 bp long, 5-10 copies per genome			UPSTREAM:orf19.4081-P	1	NOISE
Ca21chr2_C_albicans_SC5314	1914194	G	A	165	1	59	9	orf19.1598	ERG24	orf19.9166|IPF25723.1|IPF3764.2|Contig4-3095_0045|orf6.1086|orf6.1911|CA0300|CaO19.9166|CaO19.1598	ORF|Verified	C-14 sterol reductase, has a role in ergosterol biosynthesis; mutation confers increased sensitivity to dyclonine	V167I	G498A	orf19.1598-P	1	NOISE
Ca21chr2_C_albicans_SC5314	1917499	A	C	130	0	44	10								UPSTREAM:orf19.1599-P	1	NOISE
Ca21chr2_C_albicans_SC5314	1919583	A	C	133	1	69	9	orf19.1600		orf19.9168|IPF25722.1|IPF19700.1|Contig4-3095_0049|Contig4-3095_0051|orf6.1649|CA0614|CaO19.9168|CaO19.1600|IPF19700	ORF|Uncharacterized		L101F	A302C	orf19.1600-P	1	NOISE
Ca21chr2_C_albicans_SC5314	1966238	A	G	173	1	53	7	orf19.1394		orf19.8972|IPF11063.2|IPF29472.1|orf6.2246|orf6.5347|YCR090|CA0992|CaO19.1394|IPF11063	ORF|Uncharacterized	Putative protein of unknown function; protein not essential for viability; protein level decreases in stationary phase cultures	T100A	A297G	orf19.1394-P	1	NOISE
Ca21chr2_C_albicans_SC5314	1972339	G	C	62	0	19	4								UPSTREAM:orf19.1390-P	1	NOISE
Ca21chr2_C_albicans_SC5314	1987271	C	A	147	0	68	8	orf19.1378	SUP35	orf19.8958|IPF25930.1|IPF19754.1|Contig4-2434_0007|orf6.4164|CA2313|CaO19.8958|CaO19.1378|ERF3	ORF|Verified	Translation factor eRF3; shows prion-like aggregation in some, not all, studies; partially complements S. cerevisiae sup35 mutant translation defect; species barrier with S. cerevisiae Sup35p prion; gene not regulated by yeast-hyphal switch	T518N	C1552A	orf19.1378-P	1	NOISE
Ca21chr2_C_albicans_SC5314	2004494	T	C	70	73	8	27								UPSTREAM:orf19.1369-P	1	NOISE
Ca21chr2_C_albicans_SC5314	2062495	T	C	48	54	7	23	orf19.1776		orf19.9343|IPF25566.1|IPF9030.2|Contig4-2728_0006|orf6.2664|CA1255|CaO19.1776|CaO19.9343|IPF9030	ORF|Uncharacterized	S. cerevisiae ortholog CAB4 has role in coenzyme A biosynthetic process and localizes to cytoplasm, nucleus	F297L	T888C	orf19.1776-P	1	NOISE
Ca21chr2_C_albicans_SC5314	2064287	A	C	180	1	31	6								UPSTREAM:orf19.1774-P	1	NOISE
Ca21chr2_C_albicans_SC5314	2083228	C	T	99	2	83	12								UPSTREAM:orf19.1766-P	1	NOISE
Ca21chr2_C_albicans_SC5314	2095101	T	C	135	8	44	7	orf19.1762	OCA1	orf19.9331|IPF25568.1|IPF6845.2|Contig4-1964_0001|orf6.4087|CA2259|CaO19.1762|IPF6845	ORF|Verified	Putative protein phosphatase of the PTP family (tyrosine-specific), similar to S. cerevisiae Oca1p; mutant shows virulence defect; not essential for viability	H124H	T371C	orf19.1762-P	1	NOISE
Ca21chr2_C_albicans_SC5314	2117578	G	C	108	9	41	7	orf19.1751	SPT23	orf19.9320|IPF25551.1|IPF10741.2|orf6.1080|orf6.1828|CA0726|MGA2|CaO19.1751|IPF10741	ORF|Verified	Protein involved in regulation of unsaturated fatty acid biosynthesis; controls the expression of the Ole1p delta-9-fatty acid desaturase	A572P	G1713C	orf19.1751-P	1	NOISE
Ca21chr2_C_albicans_SC5314	2129728	A	T	84	74	18	40	orf19.1745		orf19.9312|IPF16671.1|IPF15008.3|Contig4-2199_0006|orf6.2017|orf6.70|CA0850|LDG1|CaO19.1745|IPF16671	ORF|Uncharacterized	Hap43p-repressed gene	E57D	A170T	orf19.1745-P	1	NOISE
Ca21chr2_C_albicans_SC5314	2132292	A	G	105	0	34	6	orf19.1743	ACS1	orf19.9310|IPF25554.1|IPF15005.2|Contig4-2199_0001|orf6.2015|CA0848|CaO19.9310|CaO19.1743	ORF|Uncharacterized	Putative acetyl-CoA synthetase; upregulated by human neutrophils; fluconazole-downregulated; regulated by Nrg1p and Mig1p; shows colony morphology-related gene regulation by Ssn6p; only detected in stationary phase cultures; biofilm-induced	K659K	A1976G	orf19.1743-P	1	NOISE
Ca21chr3_C_albicans_SC5314	4249	C	T	144	267	162	468	orf19.5474;orf19.5475		orf19.12929|IPF21741.1|IPF2681.1|orf6.8710|CaO19.5474|CaO19.12929;IPF21738.1|IPF2680.1|orf6.6377|orf6.8711	ORF|Uncharacterized;ORF|Dubious	Predicted ORF in Assemblies 19, 20 and 21; transcriptionally activated by Mnl1p under weak acid stress; transcription detected in high-resolution tiling array experiments	P211S;P84S	C631T;C250T	orf19.5474-P;orf19.5475-P	1	NOISE
Ca21chr3_C_albicans_SC5314	13831	G	A	138	9	60	14	orf19.5467	TLO7	orf19.12922|IPF21767.1|IPF4141.1|orf6.8703|CA5808|TLO7b|CaO19.5467|CTA225|CaO19.12922|CTA20.5f	ORF|Uncharacterized	Member of a family of telomere-proximal genes of unknown function; may be spliced in vivo	V26I	G75A	orf19.5467-P	1	NOISE
Ca21chr3_C_albicans_SC5314	77787	T	G	123	0	49	10	orf19.5409		orf19.12864|IPF21748.1|IPF1098.1|Contig4-2289_0004|orf6.8645|CA5767|IST1|CaO19.12864|CaO19.5409|IPF1098	ORF|Uncharacterized	S. cerevisiae ortholog IST1 has role in late endosome to vacuole transport via multivesicular body sorting pathway and localizes to endosome	S35A	T102G	orf19.5409-P	1	NOISE
Ca21chr3_C_albicans_SC5314	107332	A	G	93	0	19	4								UPSTREAM:orf19.5392-P	1	NOISE
Ca21chr3_C_albicans_SC5314	112290	C	A	127	4	30	10	orf19.5391		orf19.12846|IPF21794.1|IPF1063.2|Contig4-3071_0027|Contig4-3071_0028|orf6.8627|CA5755|SAP130|CaO19.5391|CaO19.12846|IPF1063	ORF|Uncharacterized	Hap43p-induced gene	T1069K	C3205A	orf19.5391-P	1	NOISE
Ca21chr3_C_albicans_SC5314	115129	G	T	100	7	41	7	orf19.5389	FKH2	orf19.12844|orf6.8625|IPF21713.1|IPF1059.2|IPF1060.2|Contig4-3071_0032|orf6.8626|CA5753|CaO19.12844|CaO19.5389|CA5754|IPF1060|FKH1	ORF|Verified	Forkhead transcription factor; morphogenesis regulator; required for wild-type hyphal transcription, cell separation, and for virulence in cell culture; mutant lacks true hyphae, is constitutively pseudohyphal; upregulated in RHE model	M57I	G170T	orf19.5389-P	1	NOISE
Ca21chr3_C_albicans_SC5314	117404	T	C	87	78	21	57	orf19.5388	SWD1	orf19.12843|IPF21735.1|IPF1055.2|Contig4-2666_0002|orf6.8624|CA5752|CaO19.5388|CaO19.12843|IPF1055	ORF|Uncharacterized	S. cerevisiae ortholog SWD1 has histone methyltransferase activity (H3-K4 specific), has role in telomere maintenance, histone H3-K4 methylation, chromatin silencing at telomere and localizes to Set1C/COMPASS complex	H296H	T887C	orf19.5388-P	1	NOISE
Ca21chr3_C_albicans_SC5314	152291	A	C	150	0	47	7								UPSTREAM:orf19.3071-P	1	NOISE
Ca21chr3_C_albicans_SC5314	168890	T	C	81	56	10	29						N817N	T2450C	orf19.6160-P	1	NOISE
Ca21chr3_C_albicans_SC5314	180966	T	G	104	1	27	7								UPSTREAM:orf19.6166-P	1	NOISE
Ca21chr3_C_albicans_SC5314	195355	T	G	163	2	37	6	orf19.2500		orf19.10036|IPF24848.1|IPF4017.2|Contig4-2453_0012|orf6.6181|CA3816|CaO19.10036|CaO19.2500|IPF4017	ORF|Uncharacterized		Y340D	T1017G	orf19.2500-P	1	NOISE
Ca21chr3_C_albicans_SC5314	216278	C	T	10	50	5	20								UPSTREAM:orf19.2509.1-P	1	NOISE
Ca21chr3_C_albicans_SC5314	229305	G	T	94	7	39	7	orf19.2515		orf19.10051|IPF24819.1|IPF12799.2|orf6.3920|CA2146|CaO19.10051|CaO19.2515|IPF12799	ORF|Uncharacterized		K260N	G779T	orf19.2515-P	1	NOISE
Ca21chr3_C_albicans_SC5314	230591	C	T	46	3	14	4								UPSTREAM:orf19.2515-P	1	NOISE
Ca21chr3_C_albicans_SC5314	236226	T	C	133	10	18	4								UPSTREAM:orf19.3153-P	1	NOISE
Ca21chr3_C_albicans_SC5314	294818	T	G	127	1	46	6	orf19.1714	PGA44	orf19.9282|IPF25662.1|IPF14081.2|orf6.3113|orf6.4847|orf6.4846|CA1553|CaO19.1714|IPF14081	ORF|Uncharacterized	Putative GPI-anchored protein	N186K	T557G	orf19.1714-P	1	NOISE
Ca21chr3_C_albicans_SC5314	304564	C	T	83	0	41	8								UPSTREAM:orf19.1710-P	1	NOISE
Ca21chr3_C_albicans_SC5314	313521	A	T	102	8	22	6								UPSTREAM:orf19.1704-P	1	NOISE
Ca21chr3_C_albicans_SC5314	326941	T	G	119	1	36	6	orf19.1693	CAS4	orf19.9261|IPF25646.1|IPF29342.1|IPF6521.3|Contig4-2861_0008|Contig4-2861_0009|Contig4-2861_0010|Contig4-2869_0015|orf6.3035|orf6.4146|CA2301|CA6262|orf19.1694|TAO3|PAG1|TAO3.5f	ORF|Verified	Protein of RAM cell wall integrity signaling network; role in cell separation, azole sensitivity; required for hyphal growth; insertion mutation near 3' end of gene causes increase in caspofungin sensitivity; pheromone/hyphal induced	S1943A	T5826G	orf19.1693-P	1	NOISE
Ca21chr3_C_albicans_SC5314	345829	G	T	82	90	19	46	orf19.1686		orf19.9254|IPF25619.1|IPF6511.1|Contig4-2909_0002|orf6.4153|CA2305|MPA43|CaO19.9254|CaO19.1686	ORF|Uncharacterized		G133W	G396T	orf19.1686-P	1	NOISE
Ca21chr3_C_albicans_SC5314	352413	T	C	160	0	58	9	orf19.1683	PPH21	orf19.9252|IPF11679.2|IPF11680.3|Contig4-2363_0004|orf6.1330|orf6.890|CA0425|CaO19.1683	ORF|Uncharacterized	Putative protein phosphatase of the Type 2A-related family (serine/threonine-specific), similar to S. cerevisiae Pph21p; caspofungin repressed; possibly an essential gene, disruptants not obtained by UAU1 method	I190T	T568C	orf19.1683-P	1	NOISE
Ca21chr3_C_albicans_SC5314	355684	G	C	64	54	11	31								UPSTREAM:orf19.1680-P	1	NOISE
Ca21chr3_C_albicans_SC5314	379580	G	A	156	1	22	6								UPSTREAM:orf19.1671-P	1	NOISE
Ca21chr3_C_albicans_SC5314	381599	A	C	71	4	19	4								UPSTREAM:orf19.1671.1-P	1	NOISE
Ca21chr3_C_albicans_SC5314	527208	T	C	144	13	46	7	orf19.229		orf19.7859|IPF27020.1|IPF15248.2|Contig4-2074_0003|orf6.217|CA0032|CaO19.229|CaO19.7859|IPF15248	ORF|Uncharacterized		L411S	T1230C	orf19.229-P	1	NOISE
Ca21chr3_C_albicans_SC5314	536077	A	C	80	2	13	5								UPSTREAM:orf19.232-P	1	NOISE
Ca21chr3_C_albicans_SC5314	548715	A	G	161	0	86	10	orf19.242	SAP8	orf19.7872|IPF27022.1|IPF10508.1|Contig4-2868_0016|orf6.2688|CA1266|CaO19.7872|CaO19.242	ORF|Verified	Secreted aspartyl proteinase; regulated by growth phase, temperature, and white-opaque switch; highly expressed in opaque cells; expressed upon deep epidermal invasion; greater expression during vaginal infection than oral infection	*246W	A736G	orf19.242-P	1	NOISE
Ca21chr3_C_albicans_SC5314	565972	A	G	50	52	11	31								UPSTREAM:orf19.251-P	1	NOISE
Ca21chr3_C_albicans_SC5314	580719	C	T	63	61	16	37								UPSTREAM:orf19.260-P	1	NOISE
Ca21chr3_C_albicans_SC5314	604084	C	T	64	57	13	35								UPSTREAM:orf19.271-P	1	NOISE
Ca21chr3_C_albicans_SC5314	614588	A	C	72	70	15	38	orf19.274	TFC4	orf19.7906|IPF27095.1|IPF10122.3|Contig4-2667_0008|Contig4-2667_0010|orf6.3175|orf6.4803|CA2774|CaO19.274|IPF10122.2	ORF|Uncharacterized	Putative RNA polymerase III transcription initiation factor complex (TFIIIC) subunit; transcriptionally activated by Mnl1p under weak acid stress; possibly an essential gene, disruptants not obtained by UAU1 method	*818S	A2452C	orf19.274-P	1	NOISE
Ca21chr3_C_albicans_SC5314	670326	G	A	175	7	71	8								UPSTREAM:orf19.314-P	1	NOISE
Ca21chr3_C_albicans_SC5314	697346	A	T	56	4	48	8	orf19.329		orf19.7961|IPF27016.1|IPF8351.2|Contig4-2705_0010|Contig4-2705_0011|orf6.5629|CA3380|CaO19.329|MSL5|CaO19.7961	ORF|Uncharacterized	S. cerevisiae ortholog MSL5 has pre-mRNA branch point binding, has role in nuclear mRNA splicing, via spliceosome and localizes to commitment complex	H340L	A1018T	orf19.329-P	1	NOISE
Ca21chr3_C_albicans_SC5314	709958	C	T	102	2	28	9								UPSTREAM:orf19.334-P	1	NOISE
Ca21chr3_C_albicans_SC5314	735640	T	G	168	0	60	14								UPSTREAM:orf19.344-P	1	NOISE
Ca21chr3_C_albicans_SC5314	769668	T	G	204	2	75	13	orf19.6956	DAL9	orf19.14218|IPF20188.1|IPF8658.2|Contig4-3085_0033|orf6.7342|CA4719|DAL51|CaO19.6956|DAL52|CaO19.14218	ORF|Uncharacterized	Putative allantoate permease; fungal-specific (no human or murine homolog)	F405V	T1212G	orf19.6956-P	1	NOISE
Ca21chr3_C_albicans_SC5314	803454	A	G	58	89	11	29								UPSTREAM:orf19.6934-P	1	NOISE
Ca21chr3_C_albicans_SC5314	812671	C	T	66	84	24	62	orf19.6927	PEP8	orf19.14189|IPF20195.1|IPF4220.1|Contig4-2390_0008|orf6.7313|CA4699|CaO19.14189|CaO19.6927|IPF4220	ORF|Verified	Protein similar to S. cerevisiae Pep8p, which is involved in retrograde transport; transposon mutation affects filamentous growth	P102L	C304T	orf19.6927-P	1	NOISE
Ca21chr3_C_albicans_SC5314	882170	A	G	19	58	7	24								UPSTREAM:orf19.5866-P	1	NOISE
Ca21chr3_C_albicans_SC5314	882604	A	G	110	1	15	4								UPSTREAM:orf19.5867-P	1	NOISE
Ca21chr3_C_albicans_SC5314	967643	A	C	121	1	60	8	orf19.5915		orf19.13336|orf19.13337|IPF21222.1|IPF21257.1|IPF4364.1|IPF4365.1|Contig4-3037_0006|Contig4-3037_0007|orf6.9122|orf6.9121|CA6133|CA6132|orf19.5916|DUR35.3f	ORF|Uncharacterized	Putative urea transporter	G91G	A272C	orf19.5915-P	1	NOISE
Ca21chr3_C_albicans_SC5314	995771	T	C	103	3	38	7	orf19.5930		orf19.13351|IPF21232.1|IPF132.1|Contig4-2867_0006|Contig4-2867_0007|orf6.9107|CA6120|CaO19.13351|NUP42|CaO19.5930|IPF132	ORF|Uncharacterized		I314T	T940C	orf19.5930-P	1	NOISE
Ca21chr3_C_albicans_SC5314	996257	C	A	133	4	30	5	orf19.5931		orf19.13352|IPF21244.1|IPF128.1|Contig4-2867_0004|orf6.9106|CA6119|CaO19.13352|ARV1|CaO19.5931	ORF|Uncharacterized	S. cerevisiae ortholog ARV1 has role in intracellular sterol transport, sphingolipid metabolic process and localizes to endoplasmic reticulum, Golgi apparatus	T56K	C166A	orf19.5931-P	1	NOISE
Ca21chr3_C_albicans_SC5314	1031331	T	G	162	1	61	8	orf19.5949	FAS2	orf19.13370|orf19.13372|IPF21167.1|IPF21281.1|IPF21154.1|IPF76.2|IPF77.2|IPF80.2|Contig4-3087_0034|Contig4-3087_0035|Contig4-3087_0037|orf6.9086|orf6.9089|CA6107|CA6105|orf19.5951|FAS2.3f	ORF|Verified	Alpha subunit of fatty-acid synthase; required for virulence in mouse systemic infection and rat oropharyngeal infection models; regulated by Efg1p; fluconazole-induced; amphotericin B repressed	S1686R	T5057G	orf19.5949-P	1	NOISE
Ca21chr3_C_albicans_SC5314	1090396	A	C	173	0	54	9	orf19.5976		orf19.13397|IPF21218.1|IPF26.1|IPF26|Contig4-3042_0027|orf6.9061|CA6083|CaO19.5976|CaO19.13397	ORF|Uncharacterized	Predicted ORF in Assemblies 19, 20 and 21; decreased transcription is observed upon fluphenazine treatment, in azole-resistant strains that overexpress CDR1 and CDR2 or MDR1	T132P	A393C	orf19.5976-P	1	NOISE
Ca21chr3_C_albicans_SC5314	1115557	A	G	114	3	17	6								UPSTREAM:orf19.5992-P	1	NOISE
Ca21chr3_C_albicans_SC5314	1151388	T	C	168	0	55	7								UPSTREAM:orf19.6001-P	1	NOISE
Ca21chr3_C_albicans_SC5314	1153834	T	C	141	0	33	8	orf19.6002	RPL8B	orf19.13423|RPL81|IPF21253.1|IPF8312.2|RPL8B-1|Contig4-1997_0002|orf6.9035|CA6064|CaO19.6002|CaO19.13423	ORF|Uncharacterized	Predicted ribosomal protein; transcription is regulated upon yeast-hyphal switch; genes encoding cytoplasmic ribosomal subunits, translation factors, and tRNA synthetases are downregulated upon phagocytosis by murine macrophage	L70S	T208C	orf19.6002-P	1	NOISE
Ca21chr3_C_albicans_SC5314	1159162	A	C	144	0	48	8	orf19.6005	HGT5	orf19.13426|IPF21176.1|IPF8307.1|Contig4-2656_0009|orf6.9032|CA6062|CaO19.13426|STL98|CaO19.6005|IPF8307	ORF|Uncharacterized	Putative glucose transporter of the major facilitator superfamily; the C. albicans glucose transporter family comprises 20 members; 12 probable membrane-spanning segments, extended N terminus; expressed in rich medium; Hap43p-repressed	N553H	A1656C	orf19.6005-P	1	NOISE
Ca21chr3_C_albicans_SC5314	1175281	A	C	157	0	37	6								UPSTREAM:orf19.6968-P	1	NOISE
Ca21chr3_C_albicans_SC5314	1221157	C	A	67	0	11	4								UPSTREAM:orf19.6983-P	1	NOISE
Ca21chr3_C_albicans_SC5314	1340351	T	A	113	5	32	5								UPSTREAM:orf19.7377-P	1	NOISE
Ca21chr3_C_albicans_SC5314	1344688	T	G	124	0	48	9	orf19.7378		IPF1276.1|Contig4-3093_0019|orf6.8538|CA5675|SIS2|CaO19.7378	ORF|Uncharacterized		P123P	T368G	orf19.7378-P	1	NOISE
Ca21chr3_C_albicans_SC5314	1388112	A	C	77	6	31	5	orf19.7392		IPF3320.1|Contig4-3036_0007|orf6.8552|CA5691|DED1|CaO19.7392	ORF|Uncharacterized	S. cerevisiae ortholog DED1 has ATP-dependent RNA helicase activity, RNA strand annealing activity and has role in translational initiation	E630A	A1888C	orf19.7392-P	1	NOISE
Ca21chr3_C_albicans_SC5314	1394774	A	C	168	1	41	7	orf19.7394	GDA1	IPF3313.1|Contig4-3036_0003|orf6.8554|CA5693|CaO19.7394	ORF|Verified	Golgi membrane GDPase, required for wild-type O-mannosylation, not N-glycosylation; required for wild-type hyphal induction, cell wall, and cell surface charge; not required for HeLa cell adherence; functional homolog of S. cerevisiae Gda1p	E283A	A847C	orf19.7394-P	1	NOISE
Ca21chr3_C_albicans_SC5314	1434574	A	C	154	0	38	6	orf19.7402	DOT1	IPF2639.1|Contig4-3029_0012|orf6.8562|CA5702|CaO19.7402|PCH1	ORF|Uncharacterized	Putative modulator of white-opaque switching	T95P	A282C	orf19.7402-P	1	NOISE
Ca21chr3_C_albicans_SC5314	1465442	A	C	92	1	54	11	orf19.7433		IPF19817.1|Contig4-3080_0015|Contig4-3080_0017|Contig4-3080_0018|orf6.8593|CA5724|NUP116|CaO19.7433	ORF|Uncharacterized	S. cerevisiae ortholog NUP116 has role in mRNA export from nucleus, tRNA export from nucleus, protein import into nucleus, tRNA splicing, via endonucleolytic cleavage and ligation and localizes to Nup82 complex	T601P	A1800C	orf19.7433-P	1	NOISE
Ca21chr3_C_albicans_SC5314	1477978	T	G	105	1	83	9	orf19.7436	AAF1	CAD1|IPF2468.1|Contig4-3080_0008|Contig4-3080_0010|orf6.8596|CA5726|CaO19.7436	ORF|Verified	Possible regulatory protein; putative adhesin-like protein; Glu-rich domain; production in S. cerevisiae increases endothelial cell adherence and flocculence; detected in yeast and hyphal cells; biofilm, alkaline or caspofungin upregulated	W225G	T672G	orf19.7436-P	1	NOISE
Ca21chr3_C_albicans_SC5314	1495026	A	C	139	0	35	9								UPSTREAM:orf19.7444-P	1	NOISE
Ca21chr3_C_albicans_SC5314	1497705	T	G	156	0	55	7	orf19.7445		IPF2878.1|Contig4-2403_0005|orf6.8605|CA5735|VID24|CaO19.7445|IPF2878	ORF|Uncharacterized	Ortholog of S. cerevisiae VID24	F433V	T1296G	orf19.7445-P	1	NOISE
Ca21chr3_C_albicans_SC5314	1533264	C	A	26	97	0	43	orf19.6832		orf19.14124|orf19.14125|IPF20332.1|IPF12080.1|IPF20329.1|IPF12082.2|Contig4-2530_0001|Contig4-2530_0005|Contig4-2530_0007|Contig4-2530_0013|orf6.8799|orf6.8798|CA5877|CA5876|orf19.6833|CaO19.6832|CaO19.14124|IPF12082.3f	ORF|Uncharacterized		P39H	C115A	orf19.6832-P	1	NOISE
Ca21chr3_C_albicans_SC5314	1573143	G	T	115	3	50	9	orf19.6816		orf19.14108|IPF20400.1|IPF2400.1|Contig4-3076_0009|orf6.8815|CA5891|CaO19.6816|CaO19.14108|IPF2400	ORF|Uncharacterized	S. cerevisiae ortholog YJR096W has aldehyde reductase activity, has role in arabinose catabolic process, D-xylose catabolic process, cellular response to oxidative stress and localizes to cytoplasm, nucleus	K92N	G275T	orf19.6816-P	1	NOISE
Ca21chr3_C_albicans_SC5314	1655841	A	C	156	0	29	5	orf19.6778		orf19.14070|IPF20448.1|IPF2816.1|Contig4-2943_0017|orf6.8853|CA5927|CaO19.14070|DRS2|CaO19.6778|DRS22	ORF|Uncharacterized	S. cerevisiae ortholog DRS2 has role in post-Golgi vesicle-mediated transport, ribosomal small subunit assembly, intracellular protein transport, endocytosis, phospholipid translocation	T170P	A507C	orf19.6778-P	1	NOISE
Ca21chr3_C_albicans_SC5314	1670519	A	C	99	3	21	8	orf19.6770		orf19.14062|IPF20386.1|IPF2804.1|Contig4-3030_0008|orf6.8861|CA5933|ENT4|CaO19.6770|CaO19.14062|IPF2804	ORF|Uncharacterized		E284A	A850C	orf19.6770-P	1	NOISE
Ca21chr3_C_albicans_SC5314	1684258	T	G	142	2	63	8	orf19.6760	MDS3	orf19.14051|orf19.14052|IPF20325.1|IPF3482.2|IPF20324.1|IPF2784.2|Contig4-2141_0007|Contig4-3030_0020|orf6.8872|orf6.8871|CA5938|CA5937|CaO19.14052|CaO19.6760|CaO19.6759|CaO19.14051|IPF2784|IPF3481|orf19.6759	ORF|Verified	Component of the TOR signaling pathway, required for growth and hyphal formation at pH 9 and for full virulence in a mouse model of systemic infection; has a role in chlamydospore formation	S396A	T1185G	orf19.6760-P	1	NOISE
Ca21chr3_C_albicans_SC5314	1693573	T	C	79	0	12	6								UPSTREAM:orf19.6754-P	1	NOISE
Ca21chr3_C_albicans_SC5314	1750174	A	C	122	1	71	9	orf19.6719		orf19.14011|IPF20425.1|IPF3633.1|Contig4-2901_0003|Contig4-2901_0006|orf6.6868|CA4345|CaO19.14011|HIR3|CaO19.6719|IPF3633.3f|IPF3633.3	ORF|Verified	Putative nucleosome assembly protein; homozygous transposon insertion causes decreased colony wrinkling under filamentous growth-inducing conditions, but does not block true hyphal formation in liquid media	T308P	A921C	orf19.6719-P	1	NOISE
Ca21chr4_C_albicans_SC5314	5183	T	C	44	52	27	95	orf19.367	CNH1	orf19.8001|IPF10959.2|IPF29854.1|Contig4-2956_0001|orf6.2060|orf6.2059|CA0877|CaO19.367|CA0878|CNH1.3f|IPF18845.1|CNH1.5f	ORF|Verified	Na+/H+ antiporter; required for wild-type growth, cell morphology, and virulence in a mouse model of systemic infection; not transcriptionally regulated by NaCl; fungal-specific (no human or murine homolog)	L51L	T150C	orf19.367-P	1	NOISE
Ca21chr4_C_albicans_SC5314	11327	T	G	101	2	51	7								UPSTREAM:orf19.374-P	1	NOISE
Ca21chr4_C_albicans_SC5314	12749	G	A	74	60	17	55								UPSTREAM:orf19.377-P	1	NOISE
Ca21chr4_C_albicans_SC5314	25833	T	C	70	58	16	50								UPSTREAM:orf19.5640-P	1	NOISE
Ca21chr4_C_albicans_SC5314	28128	A	C	84	2	45	8								UPSTREAM:orf19.5643-P	1	NOISE
Ca21chr4_C_albicans_SC5314	31962	T	A	61	52	7	46	orf19.5645	MET15	orf19.13090|MET25|IPF21534.1|IPF12125.2|orf6.4514|CA2565|CaO19.13090|CaO19.5645	ORF|Verified	O-acetylhomoserine O-acetylserine sulfhydrylase; involved in sulfur amino acid biosynthesis; immunogenic; Hog1p, biofilm, possibly adherence-induced; brown colony color of homozygous mutant in Pb(2+) medium is visual selection marker	T7T	T20A	orf19.5645-P	1	NOISE
Ca21chr4_C_albicans_SC5314	32561	T	C	84	72	19	73								UPSTREAM:orf19.5646-P	1	NOISE
Ca21chr4_C_albicans_SC5314	42720	A	G	103	77	19	80	orf19.5654	STE24	orf19.13099|IPF21528.1|IPF5265.1|Contig4-3054_0024|orf6.6894|CaO19.13099|CaO19.5654|CA4363	ORF|Verified	Prenyl-dependent protease	T339T	A1016G	orf19.5654-P	1	NOISE
Ca21chr4_C_albicans_SC5314	49404	T	C	68	64	8	30								UPSTREAM:orf19.5658-P	1	NOISE
Ca21chr4_C_albicans_SC5314	57057	A	G	82	77	11	57	orf19.5664	HOF1	orf19.13109|IPF21517.1|IPF5287.2|Contig4-3054_0008|orf6.6904|CA4373|CaO19.13109|CaO19.5664|IPF5287	ORF|Uncharacterized	Protein not essential for viability; similar to S. cerevisiae Hof1p, which is a protein localized to the bud neck and required for cytokinesis; periodic mRNA expression, peak at cell-cycle G2/M phase	K158K	A473G	orf19.5664-P	1	NOISE
Ca21chr4_C_albicans_SC5314	59468	G	C	69	81	20	64	orf19.5665		orf19.13110|IPF21538.1|IPF5288.2|Contig4-3054_0007|orf6.6905|CA4374|CaO19.5665|CaO19.13110|IPF5288	ORF|Uncharacterized	S. cerevisiae ortholog ARA2 has D-arabinose 1-dehydrogenase [NAD(P)+] activity and has role in dehydro-D-arabinono-1,4-lactone biosynthetic process	W294S	G880C	orf19.5665-P	1	NOISE
Ca21chr4_C_albicans_SC5314	59698	C	T	71	59	13	60								UPSTREAM:orf19.5666-P	1	NOISE
Ca21chr4_C_albicans_SC5314	59992	T	C	66	67	18	53	orf19.5666		orf19.13111|IPF21552.1|IPF11309.2|Contig4-3054_0006|orf6.6906|CA4375|CaO19.13111|CaO19.5666|IPF11309	ORF|Uncharacterized		D92D	T275C	orf19.5666-P	1	NOISE
Ca21chr4_C_albicans_SC5314	61294	A	G	72	57	21	79	orf19.5667	MNR2	orf19.13112|IPF21510.1|IPF11307.2|Contig4-3054_0004|orf6.6907|CA4376|CaO19.5667|CaO19.13112|IPF11307	ORF|Uncharacterized	Putative ion transporter; fungal-specific (no human or murine homolog)	A116A	A347G	orf19.5667-P	1	NOISE
Ca21chr4_C_albicans_SC5314	65943	G	A	47	58	17	56	orf19.5671		orf19.13116|IPF21511.1|IPF11299.2|Contig4-3054_0001|orf6.6911|CA4378|CaO19.5671|CaO19.13116|IPF11299	ORF|Uncharacterized	S. cerevisiae ortholog SYP1 has role in actin cortical patch assembly, septin cytoskeleton organization and localizes to cellular bud neck, mating projection base, mating projection tip, cellular bud tip	W255*	G763A	orf19.5671-P	1	NOISE
Ca21chr4_C_albicans_SC5314	72148	G	A	78	77	17	65								UPSTREAM:orf19.5673-P	1	NOISE
Ca21chr4_C_albicans_SC5314	88845	G	T	19	123	1	53	orf19.4191.1		IPF23078.1|IPF7996.1|Contig4-2846_0013|CA1942|HCT5.3eoc	ORF|Uncharacterized	S. cerevisiae ortholog HUL5 has ubiquitin-ubiquitin ligase activity, has role in ER-associated protein catabolic process, protein polyubiquitination and localizes to cytoplasm, nucleus, proteasome complex	K843N	G2528T	orf19.4191.1-P	1	NOISE
Ca21chr4_C_albicans_SC5314	91354	C	T	85	77	12	32								UPSTREAM:orf19.4191-P	1	NOISE
Ca21chr4_C_albicans_SC5314	98904	G	A	88	66	23	53								UPSTREAM:orf19.4187-P	1	NOISE
Ca21chr4_C_albicans_SC5314	100653	A	G	53	56	9	26								UPSTREAM:orf19.4186-P	1	NOISE
Ca21chr4_C_albicans_SC5314	110081	T	C	69	41	17	41								UPSTREAM:orf19.4180-P	1	NOISE
Ca21chr4_C_albicans_SC5314	110873	T	C	78	57	9	51	orf19.4179		orf19.11655|IPF23104.1|IPF11901.2|Contig4-2567_0001|orf6.6073|CA3729|CaO19.11655|CaO19.4179|IPF11901	ORF|Uncharacterized	Putative adhesin-like protein	S162S	T485C	orf19.4179-P	1	NOISE
Ca21chr4_C_albicans_SC5314	110960	C	A	80	79	8	39								UPSTREAM:orf19.4177-P	1	NOISE
Ca21chr4_C_albicans_SC5314	111458	A	T	77	81	23	55	orf19.4177	HIS5	orf19.11653|IPF23080.1|IPF23095.1|IPF11902.2|IPF6173.2|Contig4-2228_0011|orf6.6071|CA3727|HIS5.3f|orf19.4177.1	ORF|Uncharacterized	Putative histidinol-phosphate aminotransferase; Gcn4p-regulated; protein present in exponential and stationary growth phase yeast cultures	P58P	A173T	orf19.4177-P	1	NOISE
Ca21chr4_C_albicans_SC5314	116545	T	C	66	70	29	58	orf19.4174		orf19.11650|IPF23089.1|IPF6181.2|Contig4-2228_0008|orf6.6068|CA3724|CaO19.4174|CaO19.11650|IPF6181	ORF|Uncharacterized	S. cerevisiae ortholog FUN26 has nucleoside transmembrane transporter activity, has role in transmembrane transport, nucleoside transport and localizes to intracellular, membrane	V107A	T319C	orf19.4174-P	1	NOISE
Ca21chr4_C_albicans_SC5314	125717	G	A	71	78	9	42								UPSTREAM:orf19.4169-P	1	NOISE
Ca21chr4_C_albicans_SC5314	144120	C	T	85	59	15	42								UPSTREAM:orf19.4162-P	1	NOISE
Ca21chr4_C_albicans_SC5314	152200	A	G	83	86	19	61								UPSTREAM:orf19.4705-P	1	NOISE
Ca21chr4_C_albicans_SC5314	153084	A	T	79	82	26	92	orf19.4707		orf19.12178|orf6.3514|IPF22562.1|IPF4440.2|Contig4-2960_0019|CA1840|ASM1|CaO19.4707|CaO19.12178|IFP3	ORF|Uncharacterized	Putative secreted acid sphingomyelin phosphodiesterase; possible Kex2p substrate	P509P	A1526T	orf19.4707-P	1	NOISE
Ca21chr4_C_albicans_SC5314	156130	C	T	77	77	26	94	orf19.4706		orf19.12177|IPF4443.2|IPF19339.2|Contig4-2960_0017|orf6.328|orf6.3515|CA0051|CaO19.4706|IPF4443	ORF|Uncharacterized	Planktonic growth-induced gene; greater mRNA upregulated in a cyr1 or ras1 homozygous mutant than in wild type; fluconazole-induced; transcription is induced in response to alpha pheromone in SpiderM medium	A78A	C233T	orf19.4706-P	1	NOISE
Ca21chr4_C_albicans_SC5314	166787	T	C	63	55	14	41	orf19.4703;orf19.4702		IPF14519.1|IPF16379.2|Contig4-2960_0009|Contig4-2960_0010|orf6.3518|orf6.1755|CA6288|CaO19.4703|IPF14519.3f;orf19.12172|IPF14519.1|IPF16377.2|Contig4-2960_0008|orf6.3519|orf6.1755|CA0683|CaO19.4702|IPF14519.5f|IPF14519	ORF|Uncharacterized;ORF|Uncharacterized	Protein with similarity to mutator-like element (MULE) transposase;Biofilm-induced gene; expression regulated during planktonic growth; similarity to mutator-like element (MULE) transposase	S16P;V274A	T45C;T820C	orf19.4703-P;orf19.4702-P	1	NOISE
Ca21chr4_C_albicans_SC5314	195786	T	G	134	5	49	7	orf19.4690		orf19.12159|IPF17437.2|IPF14122.2|Contig4-2733_0001|orf6.1056|orf6.1770|orf6.460|CA0087|SMF11|SMF12|CaO19.4690	ORF|Uncharacterized	Biofilm-induced gene; induced by nitric oxide independent of Yhb1p	V193G	T577G	orf19.4690-P	1	NOISE
Ca21chr4_C_albicans_SC5314	200093	A	G	74	73	26	61	orf19.4688	DAG7	orf19.12157|IPF14119.1|IPF28307.1|Contig4-2733_0007|orf6.1768|CA0689|CaO19.4688|CaO19.12157|IPF14119	ORF|Verified	Alpha-factor induced gene; mutation confers hypersensitivity to toxic ergosterol analog; a-specific transcription; planktonic growth-induced; fluconazole-repressed	A47A	A140G	orf19.4688-P	1	NOISE
Ca21chr4_C_albicans_SC5314	217162	C	T	49	58	10	31	orf19.4682	HGT17	orf19.12151|IPF22574.1|IPF7493.1|Contig4-2949_0011|orf6.5454|CA3241|QUP3|CaO19.4682|CaO19.12151|IPF7493	ORF|Uncharacterized	Putative glucose transporter of the major facilitator superfamily; the C. albicans glucose transporter family comprises 20 members; 12 probable membrane-spanning segments; induced at low (0.2%, compared to 2%) glucose in rich media	T5I	C13T	orf19.4682-P	1	NOISE
Ca21chr4_C_albicans_SC5314	228015	G	T	83	59	19	50	orf19.4678		orf19.12147|IPF22612.1|IPF19980.1|Contig4-2949_0004|orf6.5458|CA3245|CaO19.4678|IPF19980	ORF|Uncharacterized	Ortholog of S. cerevisiae YJR107W	R330S	G989T	orf19.4678-P	1	NOISE
Ca21chr4_C_albicans_SC5314	237932	A	G	79	70	15	48								UPSTREAM:orf19.4673-P	1	NOISE
Ca21chr4_C_albicans_SC5314	241302	G	T	69	71	7	35								UPSTREAM:orf19.4670-P	1	NOISE
Ca21chr4_C_albicans_SC5314	243943	A	C	63	61	11	37								UPSTREAM:orf19.4664-P	1	NOISE
Ca21chr4_C_albicans_SC5314	248313	A	G	74	61	14	51								UPSTREAM:orf19.4668-P	1	NOISE
Ca21chr4_C_albicans_SC5314	250757	A	T	67	53	8	31								UPSTREAM:orf19.4665-P	1	NOISE
Ca21chr4_C_albicans_SC5314	252068	T	A	61	48	13	36								UPSTREAM:orf19.4662-P	1	NOISE
Ca21chr4_C_albicans_SC5314	258896	C	G	64	49	20	50								UPSTREAM:orf19.4658-P	1	NOISE
Ca21chr4_C_albicans_SC5314	271789	A	G	80	57	21	49								UPSTREAM:orf19.4654-P	1	NOISE
Ca21chr4_C_albicans_SC5314	280604	C	T	90	82	12	56	orf19.4650	ILV6	orf19.12119|IPF9306.1|IPF15583.2|Contig4-2275_0003|orf6.304|orf6.3347|CA1719|CaO19.4650	ORF|Uncharacterized	Putative regulatory subunit of acetolacetate synthase ; fungal-specific (no human or murine homolog); alkaline upregulated; regulated by Gcn2p and Gcn4p; protein present in exponential and stationary growth phase yeast cultures	T13I	C37T	orf19.4650-P	1	NOISE
Ca21chr4_C_albicans_SC5314	284757	A	G	95	98	19	43	orf19.4649	ZCF27	orf19.12118|IPF22676.1|IPF9312.1|Contig4-3006_0019|orf6.3346|CA1718|CaO19.12118|CaO19.4649|IPF9312	ORF|Uncharacterized	Putative transcription factor with zinc cluster DNA-binding motif	N505D	A1512G	orf19.4649-P	1	NOISE
Ca21chr4_C_albicans_SC5314	303240	C	A	87	74	19	49	orf19.4642		orf19.12112|IPF22602.1|IPF14165.2|Contig4-2596_0004|orf6.2366|CA1062|CaO19.4642|CaO19.12112|IPF14165	ORF|Uncharacterized	Hap43p-induced gene	P36P	C107A	orf19.4642-P	1	NOISE
Ca21chr4_C_albicans_SC5314	303627	T	C	83	67	16	40								UPSTREAM:orf19.4641-P	1	NOISE
Ca21chr4_C_albicans_SC5314	305101	C	T	13	30	6	23								UPSTREAM:orf19.4640-P	1	NOISE
Ca21chr4_C_albicans_SC5314	309817	C	T	2	2	2	21	orf19.4636		IPF18777.2|IPF9000.3|Contig4-2825_0006|orf6.1838|orf6.2372|CA0732|CaO19.4636|IPF9000|IPF9000.2	ORF|Dubious	Predicted ORF in Assemblies 19, 20 and 21; overlaps orf19.4636	A30V	C88T	orf19.4636-P	1	NOISE
Ca21chr4_C_albicans_SC5314	315518	C	A	68	83	15	38								UPSTREAM:orf19.4636-P	1	NOISE
Ca21chr4_C_albicans_SC5314	316596	C	T	64	57	7	33								UPSTREAM:orf19.4632-P	1	NOISE
Ca21chr4_C_albicans_SC5314	320674	T	A	81	65	11	40	orf19.4630	CPA1	orf19.12100|IPF11885.2|IPF18128.2|Contig4-2886_0008|orf6.2053|CA0874|CaO19.4630	ORF|Uncharacterized	Putative carbamoyl-phosphate synthase subunit; alkaline downregulated; transcription is upregulated in both intermediate and mature biofilms	T285T	T854A	orf19.4630-P	1	NOISE
Ca21chr4_C_albicans_SC5314	329113	T	A	97	77	12	46	orf19.4628		orf19.12098|IPF22582.1|IPF10155.2|Contig4-2945_0027|orf6.7927|CA5190|CaO19.4628|CaO19.12098|IPF10155	ORF|Verified	Putative cleavage and polyadenylation factor; heterozygous null mutant exhibits hypersensitivity to parnafungin and cordycepin in the C. albicans fitness test; possibly an essential gene, disruptants not obtained by UAU1 method	L36I	T105A	orf19.4628-P	1	NOISE
Ca21chr4_C_albicans_SC5314	329365	A	G	59	65	13	39								UPSTREAM:orf19.4628-P	1	NOISE
Ca21chr4_C_albicans_SC5314	333751	A	G	54	45	2	18	orf19.4626		orf19.12096|IPF22598.1|IPF10159.2|Contig4-2945_0024|orf6.7925|CA5188|TAP42|CaO19.12096|CaO19.4626	ORF|Uncharacterized	S. cerevisiae ortholog TAP42 has role in TOR signaling cascade, positive regulation of transcription from RNA polymerase I promoter and localizes to soluble fraction, peripheral to membrane of membrane fraction	*129*	A386G	orf19.4626-P	1	NOISE
Ca21chr4_C_albicans_SC5314	334658	G	A	81	63	15	40	orf19.4625	TOA2	orf19.12095|IPF22646.1|IPF10160.1|Contig4-2945_0022|orf6.7924|CA5187|CaO19.12095|CaO19.4625	ORF|Uncharacterized	Putative TFIIA small subunit; protein abundance decreased in CAI4 strain compared to the SC5314 strain, abundance not affected by reintegration of URA3 in CAI4; flucytosine induced; possibly an essential gene (UAU1 method)	Q33Q	G98A	orf19.4625-P	1	NOISE
Ca21chr4_C_albicans_SC5314	336556	G	T	82	72	15	55								UPSTREAM:orf19.4624-P	1	NOISE
Ca21chr4_C_albicans_SC5314	346122	C	T	48	52	24	58	orf19.4618	FBA1	orf19.12088|ALF|IPF22611.1|IPF11096.2|Contig4-2945_0004|orf6.7917|CA5180|CaO19.12088|CaO19.4618	ORF|Verified	Putative fructose-bisphosphate aldolase, enzyme of glycolysis; antigenic in murine/human infection; regulated by yeast-hyphal switch; induced by Efg1p, Gcn4p, Hog1p, biofilm, planktonic growth, or fluconazole; phagocytosis-repressed	N326N	C977T	orf19.4618-P	1	NOISE
Ca21chr4_C_albicans_SC5314	348217	C	T	58	80	17	47	orf19.4617		orf19.12087|IPF22631.1|IPF11098.1|Contig4-1340_0001|Contig4-2945_0002|orf6.7916|CA5179|MAK3|CaO19.4617	ORF|Uncharacterized	S. cerevisiae ortholog MAK3 has peptide alpha-N-acetyltransferase activity, has role in N-terminal protein amino acid acetylation and localizes to NatC complex	I7I	C20T	orf19.4617-P	1	NOISE
Ca21chr4_C_albicans_SC5314	361962	T	C	68	60	11	31	orf19.4609		orf19.12079|IPF22624.1|IPF6037.1|Contig4-2931_0007|orf6.7908|CA5171|CaO19.12079|CaO19.4609|IPF6037	ORF|Uncharacterized	Putative dienelactone hydrolase; protein abundance is affected by URA3 expression in the CAI-4 strain background; protein present in exponential and stationary growth phase yeast cultures	I4T	T10C	orf19.4609-P	1	NOISE
Ca21chr4_C_albicans_SC5314	384100	C	T	87	77	29	93	orf19.4596		orf19.12065|IPF22594.1|IPF992.1|Contig4-3104_0062|orf6.7895|CA5158|CaO19.12065|CaO19.4596|IPF992	ORF|Uncharacterized		H145Y	C432T	orf19.4596-P	1	NOISE
Ca21chr4_C_albicans_SC5314	407284	G	A	62	51	17	50	orf19.4590	RFX2	orf19.12059|IPF22684.1|IPF1009.1|Contig4-3104_0040|Contig4-3104_0041|Contig4-3104_0043|orf6.7889|CA5151|CaO19.4590|CaO19.12059|IPF1009	ORF|Verified	Transcriptional repressor; regulator of filamentation, response to DNA damage, adhesion, virulence in murine mucosal, systemic infections; RFX domain; regulated by Nrg1p, UV-induced; partially complements S. cerevisiae rfx1 mutant defects	R712Q	G2134A	orf19.4590-P	1	NOISE
Ca21chr4_C_albicans_SC5314	427633	A	G	80	78	26	72								UPSTREAM:orf19.4577-P	1	NOISE
Ca21chr4_C_albicans_SC5314	431472	A	G	72	77	8	40	orf19.4574		orf19.12043|IPF18767.2|IPF1032.2|Contig4-3104_0015|orf6.2402|orf6.7873|CA5137|CaO19.4574|CaO19.12043|IPF1032	ORF|Uncharacterized	S. cerevisiae ortholog YOR059C localizes to lipid particle	A135A	A404G	orf19.4574-P	1	NOISE
Ca21chr4_C_albicans_SC5314	437328	C	T	91	80	18	47	orf19.4570		orf19.12039|IPF22643.1|IPF1038.2|Contig4-3104_0012|orf6.2406|CA1085|CaO19.12039|CaO19.4570|IPF1038	ORF|Uncharacterized		A122V	C364T	orf19.4570-P	1	NOISE
Ca21chr4_C_albicans_SC5314	438282	G	C	71	70	23	69	orf19.4569		orf19.12038|IPF1039.2|IPF28306.1|Contig4-3104_0011|orf6.2407|CA1086|CaO19.4569|CaO19.12038|IPF1039	ORF|Uncharacterized		S101S	G302C	orf19.4569-P	1	NOISE
Ca21chr4_C_albicans_SC5314	439105	T	G	150	3	38	10	orf19.4568	ZCF25	orf19.12037|IPF22554.1|IPF1040.3|Contig4-3104_0010|orf6.2408|orf6.3100|CA1544|CaO19.4568|IPF1040|IPF1040.2	ORF|Uncharacterized	Putative transcription factor with zinc cluster DNA-binding motif	I715S	T2143G	orf19.4568-P	1	NOISE
Ca21chr4_C_albicans_SC5314	441784	C	A	63	56	10	49								UPSTREAM:orf19.4568-P	1	NOISE
Ca21chr4_C_albicans_SC5314	449317	G	A	62	56	23	55								UPSTREAM:orf19.4560-P	1	NOISE
Ca21chr4_C_albicans_SC5314	461401	G	A	84	69	23	71	orf19.2770.1	SOD1	orf19.10286.2|IPF24645.1|IPF7082.2|CA4120|SOD1.3	ORF|Verified	Cytosolic copper- and zinc-containing superoxide dismutase, involved in protection from oxidative stress and required for full virulence; alkaline upregulated by Rim101p; upregulated in the presence of human blood	S32S	G95A	orf19.2770.1-P	1	NOISE
Ca21chr4_C_albicans_SC5314	465111	G	A	71	67	21	52	orf19.2768	AMS1	orf19.10284|IPF24664.1|IPF7076.2|Contig4-2513_0006|orf6.6584|CA4123|CaO19.2768|CaO19.10284	ORF|Uncharacterized	Putative alpha-mannosidase; transcription is regulated by Nrg1p; induced during cell wall regeneration; biofilm- and planktonic growth-induced gene	E48E	G143A	orf19.2768-P	1	NOISE
Ca21chr4_C_albicans_SC5314	485526	C	T	143	1	55	13	orf19.2763		orf19.10279|IPF6631|IPF24580.1|IPF6631.1|Contig4-2938_0022|orf6.6589|CA4126|CaO19.10279|CaO19.2763	ORF|Uncharacterized	Protein not essential for viability; orf19.10279 possibly transcriptionally regulated upon hyphal formation	T39I	C115T	orf19.2763-P	1	NOISE
Ca21chr4_C_albicans_SC5314	496595	A	G	86	65	9	38	orf19.2757		orf19.10271|IPF12002.2|IPF29008.1|Contig4-1891_0003|orf6.3589|CA1897|CaO19.2757|CaO19.10271|IPF12002	ORF|Uncharacterized		Q110R	A328G	orf19.2757-P	1	NOISE
Ca21chr4_C_albicans_SC5314	506015	T	G	99	85	7	45	orf19.2752	ADR1	orf19.10266|IPF24651.1|IPF10196.2|Contig4-2786_0008|orf6.3584|CA1891|CaO19.2752|CaO19.10266|IPF10196	ORF|Verified	Putative transcription factor with zinc finger DNA-binding motif; similar to S. cerevisiae Adr1p but mutant phenotype suggests that it has a different set of target genes; transposon mutation affects filamentous growth	Y955D	T2862G	orf19.2752-P	1	NOISE
Ca21chr4_C_albicans_SC5314	514235	A	T	70	80	22	67	orf19.2749		orf19.10263|IPF24610.1|IPF13268.1|Contig4-2217_0003|orf6.2535|CA1170|CaO19.10263|CaO19.2749|IPF13268	ORF|Uncharacterized	Biofilm-induced gene; transcriptionally activated by Mnl1p under weak acid stress	V462V	A1385T	orf19.2749-P	1	NOISE
Ca21chr4_C_albicans_SC5314	533900	A	G	87	97	27	56								UPSTREAM:orf19.2742-P	1	NOISE
Ca21chr4_C_albicans_SC5314	534518	T	C	106	79	25	72	orf19.2740		orf19.10255|IPF17364.2|IPF14414.3|Contig4-1912_0001|Contig4-1912_0002|Contig4-2105_0004|orf6.4696|orf6.634|orf6.4697|CA2700|CaO19.2740|IPF1441|CA2701|IPF14414.exon2|IPF15360.2|IPF14414.exon1	ORF|Uncharacterized		Y728H	T2181C	orf19.2740-P	1	NOISE
Ca21chr4_C_albicans_SC5314	540539	G	A	72	76	27	86	orf19.2738	SUL2	orf19.10252|orf6.4694|SUL1|IPF14417.2|IPF28993.1|Contig4-2105_0001|CA2698	ORF|Uncharacterized	Putative sulfate transporter; transcription is negatively regulated by Sfu1p; induced upon biofilm formation; amphotericin B induced	V354V	G1061A	orf19.2738-P	1	NOISE
Ca21chr4_C_albicans_SC5314	549238	C	T	45	49	3	23								UPSTREAM:orf19.2735-P	1	NOISE
Ca21chr4_C_albicans_SC5314	558226	A	G	72	47	9	51	orf19.2727	GRX3	orf19.10241|IPF24624.1|IPF10259.2|Contig4-2458_0002|orf6.2519|CA1161|CaO19.10241|CaO19.2727	ORF|Uncharacterized	Putative glutaredoxin; flucytosine induced; regulated by Gcn4p; repressed in response to amino acid starvation (3-aminotriazole treatment)	I127M	A380G	orf19.2727-P	1	NOISE
Ca21chr4_C_albicans_SC5314	559342	C	T	80	82	17	68	orf19.2726		orf19.10240|IPF24621.1|IPF10262.2|orf6.2518|CA1160|CaO19.2726|CaO19.10240|IPF10262	ORF|Uncharacterized	Putative plasma membrane protein; Plc1p-regulated	H186Y	C555T	orf19.2726-P	1	NOISE
Ca21chr4_C_albicans_SC5314	568411	C	T	61	77	11	36								UPSTREAM:orf19.2725-P	1	NOISE
Ca21chr4_C_albicans_SC5314	578311	G	A	69	63	15	48	orf19.2722	CGR1	orf19.10237|IPF6403.2|IPF18718.1|Contig4-1801_0004|orf6.2697|orf6.677|CA1272|CaO19.2722	ORF|Verified	Negative regulator of yeast-form growth; HSP70 family member; induced by growth cessation at yeast-hyphal transition or in planktonic growth; physically interacts with Msi3p; similar to rat anti-aging gene, SMP30, stationary phase enriched	R309K	G925A	orf19.2722-P	1	NOISE
Ca21chr4_C_albicans_SC5314	592289	C	T	98	85	33	71								UPSTREAM:orf19.2711.1-P	1	NOISE
Ca21chr4_C_albicans_SC5314	609136	G	T	66	61	11	38								UPSTREAM:orf19.2698-P	1	NOISE
Ca21chr4_C_albicans_SC5314	654599	A	C	79	61	12	45								UPSTREAM:orf19.2677-P	1	NOISE
Ca21chr4_C_albicans_SC5314	690347	G	T	65	81	18	44	orf19.1440.2			ORF|Uncharacterized		G39V	G115T	orf19.1440.2-P	1	NOISE
Ca21chr4_C_albicans_SC5314	692401	G	A	72	68	9	76	orf19.1440.1			ORF|Uncharacterized		E65E	G194A	orf19.1440.1-P	1	NOISE
Ca21chr4_C_albicans_SC5314	699494	G	T	47	51	4	19								UPSTREAM:orf19.1439-P	1	NOISE
Ca21chr4_C_albicans_SC5314	787281	T	C	27	53	3	33								UPSTREAM:orf19.1310-P	1	NOISE
Ca21chr4_C_albicans_SC5314	790726	T	C	59	52	20	62	orf19.1307		orf19.8887|IPF26015.1|IPF6678.2|Contig4-2324_0002|orf6.2773|CA1325|CaO19.1307|CaO19.8887|IPF6678	ORF|Uncharacterized		C434R	T1299C	orf19.1307-P	1	NOISE
Ca21chr4_C_albicans_SC5314	794749	T	C	71	69	10	43	orf19.1305		orf19.8885|IPF26017.1|IPF6680.2|Contig4-1569_0002|Contig4-2781_0001|orf6.2775|CA1327|CaO19.1305|CaO19.8885|IPF6680	ORF|Uncharacterized	S. cerevisiae ortholog TRM5 has tRNA (guanine) methyltransferase activity, has role in tRNA methylation and localizes to mitochondrial matrix, nucleus	G234G	T701C	orf19.1305-P	1	NOISE
Ca21chr4_C_albicans_SC5314	800550	A	G	62	71	13	44	orf19.1301		orf19.8881|IPF13554.1|IPF18704.2|Contig4-2781_0016|orf6.1386|CA0452|CaO19.1301|IPF13554	ORF|Uncharacterized		K112E	A333G	orf19.1301-P	1	NOISE
Ca21chr4_C_albicans_SC5314	818063	A	G	74	47	29	67	orf19.5040		orf19.12507|IPF22186.1|IPF12310.2|Contig4-2272_0003|orf6.3317|CA1696|ASM4|CaO19.12507|CaO19.5040	ORF|Uncharacterized		R6G	A15G	orf19.5040-P	1	NOISE
Ca21chr4_C_albicans_SC5314	836570	A	C	64	58	12	31	orf19.1595		orf19.9163|IPF25734.1|IPF15033.2|Contig4-1965_0005|orf6.1081|CA0295|IPF15033.5eoc|IPF15033	ORF|Uncharacterized	S. cerevisiae ortholog UBX3 localizes to cytoplasm	E463D	A1388C	orf19.1595-P	1	NOISE
Ca21chr4_C_albicans_SC5314	850789	G	A	117	8	58	11	RB2-4a;orf19.1208		IPF19849.1|Contig4-3026_0002|orf6.841	repeat_region;ORF|Uncharacterized	Repeat sequence RB2 on Chromosome 4 (partial); RB2 units are part of the Major Repeat Sequence (MRS) found on most chromosomes; may serve as recombination hotspots;Predicted ORF in Assemblies 19, 20 and 21; member of a family encoded by FGR6-related genes in the RB2 repeat sequence	T15T	G44A	orf19.1208-P	1	NOISE
Ca21chr4_C_albicans_SC5314	869195	G	A	61	75	8	49								UPSTREAM:orf19.5304-P	1	NOISE
Ca21chr4_C_albicans_SC5314	869634	G	A	90	77	18	84								UPSTREAM:orf19.5305-P	1	NOISE
Ca21chr4_C_albicans_SC5314	883781	A	G	87	6	28	5								UPSTREAM:orf19.5295-P	1	NOISE
Ca21chr4_C_albicans_SC5314	885432	C	G	56	67	13	41								UPSTREAM:orf19.5297-P	1	NOISE
Ca21chr4_C_albicans_SC5314	915994	A	G	86	77	15	50	orf19.1418	SEC15	orf19.8994|orf19.8995|IPF25910.1|IPF11238.2|Contig4-2563_0007|Contig4-2563_0009|orf6.6387|orf6.6388|CA3959|CA3960|orf19.1419|CaO19.8994|CaO19.1418|IPF11236.3f	ORF|Verified	Predicted exocyst subunit; cellular bud tip-associated protein; ortholog of S. cerevisiae SEC15	E164E	A491G	orf19.1418-P	1	NOISE
Ca21chr4_C_albicans_SC5314	927533	A	G	81	78	18	58	orf19.1413	YFH1	orf19.8989|orf6.6382|IPF25917.1|IPF6713.2|Contig4-2963_0011|CA3954|CaO19.1413|CaO19.8989	ORF|Verified	Frataxin; may be required for iron storage or delivery; role in oxidative stress resistance; transcription regulated by Nrg1p, repressed if iron absent, induced by macrophage interaction; Hap43p-repressed gene	G142G	A425G	orf19.1413-P	1	NOISE
Ca21chr4_C_albicans_SC5314	937945	G	C	68	73	5	29								UPSTREAM:orf19.1409.2-P	1	NOISE
Ca21chr4_C_albicans_SC5314	940405	T	C	79	81	13	58	orf19.1409.3			ORF|Uncharacterized		F86F	T257C	orf19.1409.3-P	1	NOISE
Ca21chr4_C_albicans_SC5314	943733	C	T	103	74	19	56								UPSTREAM:orf19.1409.3-P	1	NOISE
Ca21chr4_C_albicans_SC5314	946735	G	A	87	83	24	56								UPSTREAM:orf19.3846-P	1	NOISE
Ca21chr4_C_albicans_SC5314	953376	G	A	54	45	16	69	orf19.3841		orf19.11322|IPF4085|IPF23437.1|IPF4085.1|Contig4-3060_0026|orf6.7536|CA4865|CaO19.3841|ATG1|CaO19.11322	ORF|Uncharacterized	S. cerevisiae ortholog ATG1 has protein serine/threonine kinase activity and has role in mitochondrion degradation, autophagic vacuole assembly, piecemeal microautophagy of nucleus, CVT pathway, protein phosphorylation	G166S	G495A	orf19.3841-P	1	NOISE
Ca21chr4_C_albicans_SC5314	957116	T	C	62	81	19	82	orf19.3840		orf19.11321|IPF23489.1|IPF4087.1|Contig4-3060_0022|orf6.7535|CA4864|CaO19.11321|CaO19.3840|IPF4087	ORF|Uncharacterized	Predicted ORF in Assemblies 19, 20 and 21; possibly an essential gene, disruptants not obtained by UAU1 method	F633F	T1898C	orf19.3840-P	1	NOISE
Ca21chr4_C_albicans_SC5314	962042	A	T	85	80	38	78	orf19.3839	SAP10	orf19.11320|orf6.7534|IPF23460.1|IPF4089.1|Contig4-3060_0016|CA4863|YPS3|CaO19.11320|CaO19.3839|IPF4089	ORF|Verified	Secreted aspartyl proteinase; roles in adhesion, virulence (RHE model), cell surface integrity; distinct specificity from Sap9p; at cell membrane and wall; GPI-anchored; N-glycosylated; expression greater in low iron; Tbf1p-activated	I343I	A1028T	orf19.3839-P	1	NOISE
Ca21chr4_C_albicans_SC5314	980760	C	G	104	91	20	71								UPSTREAM:orf19.3823-P	1	NOISE
Ca21chr4_C_albicans_SC5314	988788	G	T	117	8	75	16	orf19.3822	SCS7	orf19.11303|orf6.7517|IPF23462.1|IPF5819.1|Contig4-2989_0014|CA4852|CaO19.3822|CaO19.11303	ORF|Verified	Putative ceramide hydroxylase; transcription is regulated by Nrg1p; transcriptionally regulated by iron; expression greater in high iron; fluconazole-induced; Hap43p-repressed	C307F	G919T	orf19.3822-P	1	NOISE
Ca21chr4_C_albicans_SC5314	1010422	A	G	72	60	17	67	orf19.3811	GYP1	orf19.11292|IPF23453.1|IPF6940.2|Contig4-2979_0016|orf6.7506|CA4843|CaO19.11292|CaO19.3811	ORF|Uncharacterized	Putative Cis-golgi GTPase-activating protein; transcription is regulated by Nrg1p, Mig1p, and Tup1p	P264P	A791G	orf19.3811-P	1	NOISE
Ca21chr4_C_albicans_SC5314	1024135	T	A	72	64	28	61	orf19.3802	PMT6	orf19.11283|PMT3|IPF10365.3|IPF9088.2|Contig4-2789_0009|orf6.1474|orf6.1865|CA0503|CaO19.3802	ORF|Verified	Protein mannosyltransferase, required for virulence in mice and for adhesion to endothelium; role in hyphal growth signaling and hygromycin B sensitivity; not a major contributor to overall cellular PMT activity; Hap43p-repressed gene	T482T	T1445A	orf19.3802-P	1	NOISE
Ca21chr4_C_albicans_SC5314	1041153	T	C	43	61	16	59	orf19.3795	AGP3	orf19.11275|IPF23454.1|IPF6906.1|Contig4-2569_0006|orf6.3068|CA1525|CaO19.3795	ORF|Uncharacterized	Putative serine transporter with possible role in assimilation of sulfur; induced upon early biofilm formation; fungal-specific (no human or murine homolog)	F8F	T23C	orf19.3795-P	1	NOISE
Ca21chr4_C_albicans_SC5314	1043779	G	A	86	61	18	71	orf19.3794	CSR1	orf19.11274|SUR1|ZAP1|IPF23443.1|IPF6909.2|Contig4-2569_0008|orf6.3067|CA1524|CaO19.3794|CaO19.11274	ORF|Verified	Putative zinc-finger transcription factor involved in zinc homeostasis; involved in negative regulation of biofilm matrix; similar to S. cerevisiae Zap1p; mutation affects filamentous growth; suppresses S. cerevisiae rok1 mutant inviability	A116T	G345A	orf19.3794-P	1	NOISE
Ca21chr4_C_albicans_SC5314	1056426	T	A	79	70	12	42	orf19.3788	SPC34	orf19.11268|IPF23477.1|IPF6922.2|Contig4-2732_0015|orf6.152|orf6.2559|CA0023|CaO19.3788|IPF6922	ORF|Uncharacterized	Subunit of the Dam1 (DASH) complex, which acts in chromosome segregation by coupling kinetochores to spindle microtubules	I135N	T403A	orf19.3788-P	1	NOISE
Ca21chr4_C_albicans_SC5314	1061132	A	G	105	81	16	46	lambda-4a		lambda	long_terminal_repeat	Long terminal repeat (LTR) associated with the transposon Tca14; about 512 bp long, 4 copies per genome			UPSTREAM:orf19.3785-P	1	NOISE
Ca21chr4_C_albicans_SC5314	1071439	A	C	69	60	8	36	orf19.3777		orf19.11258|IPF13432.2|IPF15216.2|orf6.1134|orf6.2593|CA0329|CaO19.3777|IMG2	ORF|Uncharacterized	S. cerevisiae ortholog IMG2 has structural constituent of ribosome and localizes to mitochondrial large ribosomal subunit	L19F	A56C	orf19.3777-P	1	NOISE
Ca21chr4_C_albicans_SC5314	1073734	A	G	71	67	20	87	orf19.3775	SSK2	orf19.11257|IPF13431.2|IPF28626.1|IPF19716.1|Contig4-2648_0009|orf6.2292|orf6.2594|CA6281|CA1205|orf19.3776|SSK2.5f	ORF|Verified	Protein similar to MAP kinase kinase kinases (MAPKKK); transcription is downregulated in response to treatment with ciclopirox olamine	T894T	A2681G	orf19.3775-P	1	NOISE
Ca21chr4_C_albicans_SC5314	1092101	C	G	49	57	10	64								UPSTREAM:orf19.736-P	1	NOISE
Ca21chr4_C_albicans_SC5314	1105684	C	T	80	79	10	77	orf19.742	ALD6	orf19.8361|IPF26552.1|IPF16300.2|Contig4-2969_0013|orf6.4131|CA2290|CaO19.8361|CaO19.742|IPF16300	ORF|Uncharacterized	Putative aldehyde dehydrogenase; stationary phase enriched protein; expression regulated upon white-opaque switch; transcription is upregulated in both intermediate and mature biofilms	F275F	C824T	orf19.742-P	1	NOISE
Ca21chr4_C_albicans_SC5314	1114887	C	T	57	45	10	41								UPSTREAM:orf19.745-P	1	NOISE
Ca21chr4_C_albicans_SC5314	1117827	T	C	63	62	9	34	orf19.746		orf19.8365|IPF26553.1|IPF9748.2|Contig4-2360_0002|Contig4-2360_0003|orf6.4135|CA2293|CaO19.746|CaO19.8365|IPF9748	ORF|Uncharacterized	Ortholog of S. cerevisiae YJL049W	Y408H	T1221C	orf19.746-P	1	NOISE
Ca21chr4_C_albicans_SC5314	1120769	G	A	53	53	11	29								UPSTREAM:orf19.747-P	1	NOISE
Ca21chr4_C_albicans_SC5314	1125735	C	T	104	89	26	71	orf19.6858		orf19.14148|IPF8470|IPF20272.1|IPF8470.2|Contig4-2307_0005|orf6.7007|CA4461|CaO19.6858	ORF|Uncharacterized	S. cerevisiae ortholog EDC3 has role in deadenylation-independent decapping of nuclear-transcribed mRNA, cytoplasmic mRNA processing body assembly and localizes to cytoplasmic mRNA processing body	F340F	C1019T	orf19.6858-P	1	NOISE
Ca21chr4_C_albicans_SC5314	1129565	G	A	68	63	9	44								UPSTREAM:orf19.6859-P	1	NOISE
Ca21chr4_C_albicans_SC5314	1161090	C	G	63	65	10	31	orf19.1791		orf19.9357|IPF25533.1|IPF8738.2|Contig4-1853_0004|orf6.4370|CA2461|MAK11	ORF|Uncharacterized	Putative protein with a predicted role in 60S ribosomal subunit biogenesis; Hap43p-induced gene; ortholog of S. cerevisiae MAK11	S238V	C711G	orf19.1791-P	1	NOISE
Ca21chr4_C_albicans_SC5314	1164463	C	T	81	6	68	10								UPSTREAM:orf19.1791-P	1	NOISE
Ca21chr4_C_albicans_SC5314	1174042	G	A	35	29	3	23								UPSTREAM:orf19.1796-P	1	NOISE
Ca21chr4_C_albicans_SC5314	1237322	G	T	66	63	18	49								UPSTREAM:orf19.1246-P	1	NOISE
Ca21chr4_C_albicans_SC5314	1238040	T	C	63	59	16	43								UPSTREAM:orf19.1247-P	1	NOISE
Ca21chr4_C_albicans_SC5314	1238130	C	A	73	78	27	63								UPSTREAM:orf19.1248-P	1	NOISE
Ca21chr4_C_albicans_SC5314	1238380	T	C	66	64	18	55	orf19.1248		orf19.8832|IPF15576.2|IPF18722.2|Contig4-1942_0004|orf6.3011|CA1481|CaO19.8832|RPB3|CaO19.1248	ORF|Verified	Putative RNA polymerase II subunit B44; heterozygous null mutant exhibits resistance to parnafungin in the C. albicans fitness test	S67S	T200C	orf19.1248-P	1	NOISE
Ca21chr4_C_albicans_SC5314	1253891	T	C	86	73	23	86	orf19.1254	SEC23	orf19.8839|IPF26061.1|IPF10536.2|Contig4-2799_0002|orf6.5721|CA3453|CaO19.8839|sec231|CaO19.1254	ORF|Uncharacterized	Putative GTPase-activating protein; transcription is regulated upon yeast-hyphal switch	I613I	T1838C	orf19.1254-P	1	NOISE
Ca21chr4_C_albicans_SC5314	1272183	A	G	76	75	10	36								UPSTREAM:orf19.1260-P	1	NOISE
Ca21chr4_C_albicans_SC5314	1289823	G	A	83	79	26	55	orf19.1267		orf19.8853|IPF10278.2|IPF29519.1|Contig4-2192_0011|orf6.2159|CA0945|CaO19.1267|DJP2|CaO19.8853|IPF10278	ORF|Uncharacterized	Ortholog of S. cerevisiae CAJ1	E446E	G1337A	orf19.1267-P	1	NOISE
Ca21chr4_C_albicans_SC5314	1290405	A	G	70	73	18	52	orf19.1267.1		IPF26052.1|IPF10277.2|Contig4-2192_0002|CA0946|IPF10277	ORF|Uncharacterized	S. cerevisiae ortholog ISD11 has role in iron-sulfur cluster assembly and localizes to extrinsic to mitochondrial inner membrane, mitochondrial matrix	L61L	A182G	orf19.1267.1-P	1	NOISE
Ca21chr4_C_albicans_SC5314	1291032	C	A	73	84	14	65	orf19.1268		orf19.8854|IPF26094.1|IPF29526.1|Contig4-2192_0003|Contig4-2192_0004|orf6.2160|CaO19.1268|CaO19.8854	ORF|Uncharacterized	Predicted ORF in Assemblies 19, 20 and 21; transcription detected in high-resolution tiling array experiments	L111I	C330A	orf19.1268-P	1	NOISE
Ca21chr4_C_albicans_SC5314	1294976	T	C	76	57	20	52	orf19.1272		orf19.8858|IPF26080.1|IPF10270.2|Contig4-2192_0009|orf6.2164|CA0948|CaO19.8858|CaO19.1272|IPF10270	ORF|Uncharacterized	S. cerevisiae ortholog YGR111W has role in regulation of cell size and localizes to cytoplasm, nucleus	S38P	T111C	orf19.1272-P	1	NOISE
Ca21chr4_C_albicans_SC5314	1295973	C	T	79	79	18	54	orf19.1273		orf19.8859|IPF10269.1|IPF29523.1|Contig4-2799_0007|orf6.2165|CA0949|CaO19.1273|GIM3|CaO19.8859|IPF10269	ORF|Uncharacterized	S. cerevisiae ortholog GIM3 has tubulin binding, has role in tubulin complex assembly and localizes to prefoldin complex	L21L	C60T	orf19.1273-P	1	NOISE
Ca21chr4_C_albicans_SC5314	1328971	G	T	64	58	24	56	orf19.4407		orf19.11885|IPF11835.3|IPF28414.1|orf6.2975|orf6.401|CA0065|CaO19.4407|IPF11835|CA1456|IPF11835.3eoc|IPF15083.2	ORF|Uncharacterized	Hap43p-repressed gene	S653S	G1958T	orf19.4407-P	1	NOISE
Ca21chr4_C_albicans_SC5314	1338175	G	A	69	57	7	41								UPSTREAM:orf19.4413-P	1	NOISE
Ca21chr4_C_albicans_SC5314	1355977	T	G	137	2	56	8	orf19.4719	CWH41	orf19.11899|GLS1|PRB1|IPF22852.1|IPF15907.2|IPF8229.2|Contig4-2812_0012|orf6.4218|orf6.3155|CA2350|CA1581|orf19.4421|CaO19.4719|CWH41.3eoc	ORF|Verified	Processing alpha glucosidase I, involved in N-linked protein glycosylation and assembly of cell wall beta 1,6 glucan	G169G	T506G	orf19.4719-P	1	NOISE
Ca21chr4_C_albicans_SC5314	1358049	T	G	80	5	26	5								UPSTREAM:orf19.4420-P	1	NOISE
Ca21chr4_C_albicans_SC5314	1359632	G	A	72	63	13	43	orf19.4718	TRP5	IPF8232.2|Contig4-2812_0008|Contig4-2812_0010|orf6.3154|CA1580|CaO19.4718	ORF|Verified	Predicted tryptophan synthase; identified in detergent-resistant membrane fraction (possible lipid raft component); predicted N-terminal acetylation; Gcn4p-regulated; S. cerevisiae ortholog is Gcn4p regulated; upregulated in biofilm;	M194I	G581A	orf19.4718-P	1	NOISE
Ca21chr4_C_albicans_SC5314	1362495	A	T	83	86	7	45								UPSTREAM:orf19.4716-P	1	NOISE
Ca21chr4_C_albicans_SC5314	1363874	C	T	70	70	18	58	orf19.4716	GDH3	IPF8236.1|Contig4-2812_0004|orf6.3152|CA1579|CaO19.4716|GDH1	ORF|Uncharacterized	NADP-glutamate dehydrogenase; hyphal downregulated; regulated by Nrg1p, Plc1p; Efg1p-downregulated; upregulated by Rim101p at pH 8; ciclopirox, ketoconazole induced; repressed by hypoxia; protein present in exponential and stationary phases	A437A	C1310T	orf19.4716-P	1	NOISE
Ca21chr4_C_albicans_SC5314	1377088	G	A	80	58	27	60	orf19.2923		orf19.10440|IPF24433.1|IPF11448.2|Contig4-2802_0001|orf6.3455|CA1798|CaO19.10440|CaO19.2923|IPF11448	ORF|Uncharacterized	Predicted membrane transporter, member of the drug:proton antiporter (14 spanner) (DHA2) family, major facilitator superfamily (MFS); transcription is induced in response to alpha pheromone in SpiderM medium	A217T	G648A	orf19.2923-P	1	NOISE
Ca21chr4_C_albicans_SC5314	1396289	G	T	77	71	14	42								UPSTREAM:orf19.2910-P	1	NOISE
Ca21chr4_C_albicans_SC5314	1410749	A	C	79	66	11	45	orf19.2901	NUP60	orf19.10419|IPF24425.1|IPF13471.2|Contig4-2946_0006|Contig4-2946_0007|orf6.6121|CA3767|CaO19.2901|CaO19.10419	ORF|Uncharacterized	Protein not essential for viability; similar to S. cerevisiae Nup60p, which is a subunit of the nuclear pore complex	T466P	A1395C	orf19.2901-P	1	NOISE
Ca21chr4_C_albicans_SC5314	1414748	C	T	79	80	17	58	orf19.2898		orf19.10416|IPF24429.1|IPF13465.2|Contig4-2946_0001|orf6.6124|CA3769|CaO19.2898|CaO19.10416|IPF13465	ORF|Uncharacterized	S. cerevisiae ortholog BOR1 has boron binding, anion transmembrane transporter activity, boron transmembrane transporter activity and has role in boron transport, protein targeting to vacuole	N168N	C503T	orf19.2898-P	1	NOISE
Ca21chr4_C_albicans_SC5314	1416186	C	T	74	65	12	38								UPSTREAM:orf19.2898-P	1	NOISE
Ca21chr4_C_albicans_SC5314	1418015	G	A	67	65	26	59	orf19.2897	SOU2	orf19.10415|IPF24440.1|IPF13462.2|Contig4-2677_0002|Contig4-2677_0004|orf6.6125|CA3770|CaO19.2897|CaO19.10415	ORF|Uncharacterized	Protein similar to Sou1p; not required for utilization of L-sorbose	V280I	G837A	orf19.2897-P	1	NOISE
Ca21chr4_C_albicans_SC5314	1418227	G	C	61	68	14	50								UPSTREAM:orf19.2896-P	1	NOISE
Ca21chr4_C_albicans_SC5314	1419493	A	G	94	93	21	74	orf19.2896	SOU1	orf19.10414|IPF24438.1|IPF11150.2|Contig4-2677_0008|orf6.6126|CA3771|CaO19.2896|CaO19.10414	ORF|Verified	Enzyme involved in utilization of L-sorbose; has sorbitol dehydrogenase, fructose reductase, and sorbose reductase activities; NAD-binding site motif; transcriptional regulation affected by chromosome 5 copy number; Hap43p-induced gene	L202L	A605G	orf19.2896-P	1	NOISE
Ca21chr4_C_albicans_SC5314	1432796	G	A	67	63	10	37	orf19.2890		orf19.10408|IPF24434.1|IPF10435.2|Contig4-2827_0007|orf6.6132|CA3776|CaO19.2890|CaO19.10408|IPF10435	ORF|Uncharacterized		K198K	G593A	orf19.2890-P	1	NOISE
Ca21chr4_C_albicans_SC5314	1438891	A	T	110	6	71	9	orf19.2886	CEK1	orf19.10404|ERK1|IPF14791.2|IPF28947.1|Contig4-2827_0013|orf6.1819|CA0722|CaO19.2886	ORF|Verified	ERK-family protein kinase, required for wild-type yeast-hyphal switching, mating efficiency, and virulence in a mouse model; Cst20p-Hst7p-Cek1p-Cph1p MAPK pathway regulates mating, and invasive hyphal growth under some conditions	T56S	A165T	orf19.2886-P	1	NOISE
Ca21chr4_C_albicans_SC5314	1442979	T	G	70	54	3	26	orf19.2885	PRI2	orf19.10403|IPF24426.1|IPF14788.3|Contig4-2827_0021|orf6.1820|CA0723|CaO19.10403|CaO19.2885|IPF14788.2	ORF|Uncharacterized	Putative DNA primase; gene adjacent to and divergently transcribed with CDC68; Hap43p-induced gene	*293G	T876G	orf19.2885-P	1	NOISE
Ca21chr4_C_albicans_SC5314	1450674	A	G	95	61	18	64	orf19.2882	XUT1	orf19.10400|IPF24424.1|IPF10516.2|Contig4-2689_0006|orf6.2894|CA1407|CaO19.10400|UAP2|CaO19.2882|UAPC	ORF|Uncharacterized	Putative high-affinity, high-capacity xanthine-uric acid/H+ symporter; similar to A. nidulans UapA; member of the Nucleobase-Ascorbate Transporter/Nucleobase-Cation Symporter (NAT/NCS2) family	G420G	A1259G	orf19.2882-P	1	NOISE
Ca21chr4_C_albicans_SC5314	1455926	T	G	148	1	57	11								UPSTREAM:orf19.2881-P	1	NOISE
Ca21chr4_C_albicans_SC5314	1471276	A	G	73	72	14	45	orf19.2876	CBF1	orf19.10394|IPF24445.1|IPF3238.1|Contig4-2826_0005|orf6.4385|CA2473|CaO19.10394|CaO19.2876	ORF|Verified	Transcription factor that binds upstream of ribosomal protein genes and the rDNA locus, with Tbf1p; also regulates sulfur starvation-response, respiratory, and glycolytic genes; does not bind to centromeres as does S. cerevisiae Cbf1p	Intronic	Intronic	orf19.2876-P	1	NOISE
Ca21chr4_C_albicans_SC5314	1478594	G	A	94	55	26	60	orf19.2871	SDH12	orf19.10389|IPF3247.1|IPF28944.1|Contig4-3009_0023|orf6.4380|CA2470|SDHA|SDH3|SDH1|CaO19.2871|CaO19.10389	ORF|Verified	Succinate dehydrogenase; soluble protein in hyphae; macrophage-downregulated protein level; downregulated by Efg1p; repressed by nitric oxide; protein present in exponential and stationary growth phase yeast cultures; Hap43p-repressed gene	K564K	G1691A	orf19.2871-P	1	NOISE
Ca21chr4_C_albicans_SC5314	1489450	C	G	64	46	2	15								UPSTREAM:orf19.3142-P	1	NOISE
Ca21chr4_C_albicans_SC5314	1500913	C	T	145	8	72	8	orf19.3135		orf19.10647|IPF24165.1|IPF7802.2|Contig4-2579_0009|Contig4-3009_0026|orf6.5872|CA3568|CaO19.10647|CaO19.3135|IPF7804.3f	ORF|Uncharacterized	S. cerevisiae ortholog UBX2 has protein binding, bridging and has role in protein secretion, ER-associated protein catabolic process	D589D	C1766T	orf19.3135-P	1	NOISE
Ca21chr4_C_albicans_SC5314	1507200	A	T	68	63	8	49								UPSTREAM:orf19.3133-P	1	NOISE
Ca21chr4_C_albicans_SC5314	1507291	G	A	76	61	14	78	orf19.3133	GUT2	orf19.10645|IPF24162.1|IPF7812.2|Contig4-2291_0005|orf6.5870|CA3566|CaO19.3133|CaO19.10645	ORF|Verified	Glycerol-3-phosphate dehydrogenase; Plc1p-regulated; transcription is upregulated in both intermediate and mature biofilms	R6K	G16A	orf19.3133-P	1	NOISE
Ca21chr4_C_albicans_SC5314	1512302	C	T	64	65	21	45	orf19.3131	OYE32	orf19.10643|IPF7817|IPF24176.1|IPF7817.2|Contig4-2291_0001|orf6.5868|CA3564|OYE99|CaO19.3131|CaO19.10643	ORF|Verified	NAD(P)H oxidoreductase family protein; induced by nitric oxide, amphotericin B, oxidative stress (via Cap1p); increased transcription associated with MDR1 overexpression or benomyl treatment; macrophage-downregulated protein abundance	T255I	C763T	orf19.3131-P	1	NOISE
Ca21chr4_C_albicans_SC5314	1513472	C	A	60	46	17	54								UPSTREAM:orf19.3131-P	1	NOISE
Ca21chr4_C_albicans_SC5314	1519078	C	A	83	70	17	45								UPSTREAM:orf19.3128-P	1	NOISE
Ca21chr4_C_albicans_SC5314	1529668	A	G	66	74	10	36								UPSTREAM:orf19.3126-P	1	NOISE
Ca21chr4_C_albicans_SC5314	1537033	A	T	84	63	15	47	orf19.3121	GST1	orf19.10633|IPF24190.1|IPF12303.2|Contig4-2438_0010|orf6.6924|CA4392|CaO19.10633|CaO19.3121|IPF12303	ORF|Uncharacterized	Putative glutathione S-transferase; upregulated in the presence of human neutrophils; expression is regulated upon white-opaque switching; increased transcription is observed upon benomyl treatment	K9*	A24T	orf19.3121-P	1	NOISE
Ca21chr4_C_albicans_SC5314	1547280	A	G	71	59	15	51								UPSTREAM:orf19.3111-P	1	NOISE
Ca21chr4_C_albicans_SC5314	1551555	C	T	72	61	22	54	orf19.3109		orf19.10621|IPF24194.1|IPF8780.1|Contig4-2940_0014|orf6.6936|CA4401|CaO19.10621|CaO19.3109|IPF8780	ORF|Uncharacterized		S188S	C563T	orf19.3109-P	1	NOISE
Ca21chr4_C_albicans_SC5314	1552402	A	G	86	86	23	75								UPSTREAM:orf19.3108-P	1	NOISE
Ca21chr4_C_albicans_SC5314	1552842	G	A	88	80	16	69	orf19.3107		orf19.10619|IPF24210.1|IPF8777.2|orf6.6938|CA4403|CaO19.10619|CaO19.3107|IPF8777	ORF|Uncharacterized		V99I	G294A	orf19.3107-P	1	NOISE
Ca21chr4_C_albicans_SC5314	1557207	T	A	81	76	21	62	orf19.3104	YDC1	orf19.10616|IPF24187.1|IPF8772.2|Contig4-2940_0005|orf6.6941|CA4406|CaO19.3104|CaO19.10616	ORF|Uncharacterized	Protein with Mob2p-dependent hyphal regulation; transcription is regulated by Nrg1p and Mig1p; Hap43p-repressed gene	I161I	T482A	orf19.3104-P	1	NOISE
Ca21chr4_C_albicans_SC5314	1557731	G	A	88	77	26	65								UPSTREAM:orf19.3103-P	1	NOISE
Ca21chr4_C_albicans_SC5314	1579418	G	A	75	71	10	64	orf19.3091		orf19.10602|orf19.10603|IPF24217.1|IPF1742.3|Contig4-2877_0008|Contig4-2877_0009|Contig4-2877_0011|Contig4-2877_0013|orf6.3731|orf6.3730|orf6.6954|CA4414|orf19.3090|CaO19.3091|IPF1742|CA2008|IPF1742.3f.eoc|IPF1740.2	ORF|Uncharacterized	Predicted ORF in Assemblies 19, 20 and 21; downregulated during core stress response	A265T	G792A	orf19.3091-P	1	NOISE
Ca21chr4_C_albicans_SC5314	1589060	A	G	67	55	25	82	orf19.3083		orf19.10595|IPF24179.1|IPF1720.2|Contig4-2594_0010|orf6.3738|CA2013|CDC1|CaO19.3083|CaO19.10595	ORF|Uncharacterized	S. cerevisiae ortholog CDC1 has role in actin cytoskeleton organization, DNA repair, dephosphorylation, cellular manganese ion homeostasis and localizes to endoplasmic reticulum	D253G	A757G	orf19.3083-P	1	NOISE
Ca21chr4_C_albicans_SC5314	1596955	G	A	52	64	17	42	orf19.3076		orf19.10588|IPF24209.1|IPF1709.2|orf6.1633|CA0603|CaO19.10588|CaO19.3076|IPF1709	ORF|Uncharacterized	S. cerevisiae ortholog TVP15 has role in vesicle-mediated transport and localizes to integral to Golgi membrane, COPI-coated vesicle	V74I	G219A	orf19.3076-P	1	NOISE
Ca21chr5_C_albicans_SC5314	2118	G	A	102	4	28	6	orf19.5700	TLO11	IPF5443.2|orf6.4578|CA2615|TLO11b|CaO19.5700|CTA224|CTA241.5f|CTA241.exon1	ORF|Uncharacterized	Member of a family of telomere-proximal genes of unknown function; may be spliced in vivo	T67T	G200A	orf19.5700-P	1	NOISE
Ca21chr5_C_albicans_SC5314	4743	A	C	90	0	61	8	orf19.5698		IPF5446.1|Contig4-2278_0006|orf6.4576|CA2613|CaO19.5698|MRPL1|IPF5446	ORF|Uncharacterized	Putative mitochondrial ribosomal protein of the large subunit; transcription is upregulated in clinical isolates from HIV+ patients with oral candidiasis	T249P	A744C	orf19.5698-P	1	NOISE
Ca21chr5_C_albicans_SC5314	27838	A	C	141	0	60	9	orf19.979	FAS1	orf19.8594|Contig4-3103_0003|Contig4-3103_0006|Contig4-3103_0007|Contig4-3103_0008|IPF1611.2|orf6.8228|CA5426|CaO19.8594|CaO19.979	ORF|Verified	Beta subunit of fatty-acid synthase; multifunctional enzyme; fluconazole-induced; Hap43p-induced; amphotericin B, caspofungin repressed; macrophage/pseudohyphal-induced; fungal-specific (no human or murine homolog)	G608G	A1823C	orf19.979-P	1	NOISE
Ca21chr5_C_albicans_SC5314	39125	A	C	163	0	61	8	orf19.974	ROT2	orf19.8589|GLS2|IPF26310.1|IPF1591.1|Contig4-3103_0013|orf6.8223|CA5423|CaO19.974|CaO19.8589	ORF|Verified	Alpha-glucosidase II, catalytic subunit, required for N-linked protein glycosylation and normal cell wall synthesis; alkaline downregulated	T824P	A2469C	orf19.974-P	1	NOISE
Ca21chr5_C_albicans_SC5314	138135	G	A	122	0	33	6	orf19.929		orf19.8544|IPF26332.1|IPF8420.2|Contig4-2136_0001|orf6.2859|CA1381|CaO19.929|CaO19.8544|IPF8420	ORF|Uncharacterized		*257*	G769A	orf19.929-P	1	NOISE
Ca21chr5_C_albicans_SC5314	147798	T	C	73	72	7	26								UPSTREAM:orf19.923-P	1	NOISE
Ca21chr5_C_albicans_SC5314	169786	A	C	62	70	8	26								UPSTREAM:orf19.575-P	1	NOISE
Ca21chr5_C_albicans_SC5314	184128	T	C	74	78	14	35	orf19.579	FOL1	orf19.8210|IPF6397.3|IPF7349.2|Contig4-2857_0009|orf6.1108|orf6.466|orf6.4729|CA0088|CaO19.579|IPF7349	ORF|Uncharacterized	Putative dihydroneopterin aldolase (dihydro-6-hydroxymethylpterin pyrophosphokinase); fungal-specific (no human or murine homolog)	F52S	T154C	orf19.579-P	1	NOISE
Ca21chr5_C_albicans_SC5314	187583	C	T	71	4	40	6	orf19.581		orf19.8214|IPF19045.1|IPF6394.1|Contig4-2778_0002|orf6.1110|orf6.1112|orf6.5699|CA3436|CaO19.581|NRD1	ORF|Uncharacterized	Putative RNA-binding protein; transcription is upregulated in an RHE model of oral candidiasis	T220I	C658T	orf19.581-P	1	NOISE
Ca21chr5_C_albicans_SC5314	196667	A	G	120	8	30	7								UPSTREAM:orf19.586-P	1	NOISE
Ca21chr5_C_albicans_SC5314	197794	T	G	130	0	68	13	orf19.587		orf19.8219|orf19.9539|IPF25380.1|IPF18752.2|IPF26708.1|IPF6382.1|Contig4-2633_0004|orf6.5693|orf6.2477|CA3430|orf19.1983|CaO19.587|CaO19.8219|IPF6382	ORF|Uncharacterized	S. cerevisiae ortholog TEX1 localizes to transcription export complex	S357R	T1070G	orf19.587-P	1	NOISE
Ca21chr5_C_albicans_SC5314	229959	T	G	146	0	40	8	orf19.1963	GDS1	orf19.9519|IPF25364.1|IPF6301.2|Contig4-2813_0004|orf6.5041|CA2948|CaO19.9519|CaO19.1963	ORF|Uncharacterized	Putative mitochondrial protein; Hap43p-repressed gene	S372A	T1113G	orf19.1963-P	1	NOISE
Ca21chr5_C_albicans_SC5314	234178	T	C	79	71	16	38								UPSTREAM:orf19.1963-P	1	NOISE
Ca21chr5_C_albicans_SC5314	261193	A	C	34	0	19	4								UPSTREAM:orf19.1957-P	1	NOISE
Ca21chr5_C_albicans_SC5314	275691	C	A	72	60	19	42								UPSTREAM:orf19.1946-P	1	NOISE
Ca21chr5_C_albicans_SC5314	297065	T	A	86	7	18	4	orf19.1935		IPF9572.1|Contig4-2985_0002|orf6.831|CaO19.1935	ORF|Dubious		I115N	T343A	orf19.1935-P	1	NOISE
Ca21chr5_C_albicans_SC5314	311681	T	G	124	1	40	8	orf19.1927	SNM1	orf19.9483|IPF19001.2|IPF15109.2|Contig4-2699_0002|orf6.1278|CA0396|CaO19.1927|CaO19.9483	ORF|Uncharacterized	Protein similar to RNase MRP RNA binding protein; ciclopirox olamine induced	S22A	T63G	orf19.1927-P	1	NOISE
Ca21chr5_C_albicans_SC5314	326561	A	G	66	79	11	30	orf19.4136	YBL053	orf19.11613|IPF9818.2|IPF14987.3|Contig4-2911_0009|Contig4-2911_0010|orf6.2611|orf6.5242|orf6.5240|CA3093|CA6319|orf19.4138|orf19.4139|TOF1|TOF1.5f	ORF|Uncharacterized	S. cerevisiae ortholog TOF1 has role in mitotic sister chromatid cohesion, DNA replication checkpoint, maintenance of DNA repeat elements, replication fork protection, replication fork arrest, DNA repair	E708E	A2123G	orf19.4136-P	1	NOISE
Ca21chr5_C_albicans_SC5314	331632	C	T	86	85	20	46	orf19.4144		orf19.11620|IPF9825.2|IPF19173.1|Contig4-2911_0005|orf6.5235|orf6.719|CA3089|CaO19.4144|IPF9825	ORF|Uncharacterized	Predicted ORF in Assemblies 19, 20 and 21; clade-associated gene expression	Q398*	C1191T	orf19.4144-P	1	NOISE
Ca21chr5_C_albicans_SC5314	338426	C	T	79	68	13	43	orf19.4146	SMD3	orf19.11622|IPF14903.1|IPF19380.1|Contig4-2294_0001|orf6.235|orf6.5233|CA3087|CaO19.4146	ORF|Uncharacterized	Putative core snRNP protein; induced upon adherence to polystyrene	L43L	C126T	orf19.4146-P	1	NOISE
Ca21chr5_C_albicans_SC5314	363177	A	G	86	84	14	37	orf19.6294	MYO1	orf19.13673|IPF20864.1|IPF10851.2|Contig4-2045_0002|orf6.5444|CA3233|CaO19.6294|CaO19.13673	ORF|Verified	Component of actomyosin ring at neck of newly-emerged bud	R1787R	A5360G	orf19.6294-P	1	NOISE
Ca21chr5_C_albicans_SC5314	399484	T	C	66	5	26	6	orf19.3198	OBPA	IPF9854.2|IPF11167.1|Contig4-1502_0001|Contig4-1611_0001|Contig4-2559_0010|orf6.1881|CA0759|CaO19.3198|OBPa|IPF11167	ORF|Uncharacterized	Similar to oxysterol binding protein; gene is located within the MTLa mating-type-like locus; Plc1p-regulated	D207D	T620C	orf19.3198-P	1	NOISE
Ca21chr5_C_albicans_SC5314	406140	T	C	122	5	60	10								UPSTREAM:orf19.3195-P	1	NOISE
Ca21chr5_C_albicans_SC5314	420251	A	G	85	6	25	5								UPSTREAM:orf19.3188-P	1	NOISE
Ca21chr5_C_albicans_SC5314	431421	A	G	89	68	23	49	orf19.3180		orf19.10690|IPF24125.1|IPF12790.2|Contig4-1727_0007|Contig4-2248_0003|orf6.4477|CA2533|INP54|CaO19.3180|CaO19.10690|IPF12790	ORF|Uncharacterized	S. cerevisiae ortholog INP54 has phosphatidylinositol-4,5-bisphosphate 5-phosphatase activity, has role in phosphoinositide dephosphorylation and localizes to endoplasmic reticulum	*275*	A824G	orf19.3180-P	1	NOISE
Ca21chr5_C_albicans_SC5314	438131	T	C	68	81	15	42								UPSTREAM:orf19.3176-P	1	NOISE
Ca21chr5_C_albicans_SC5314	439421	A	G	146	0	44	7	orf19.3175		orf19.10685|IPF16916.2|IPF16824.3|Contig4-2507_0007|Contig4-2507_0008|orf6.1483|orf6.4472|YOR256W|CA0510|CaO19.3175|ETF1	ORF|Uncharacterized	Predicted ORF in Assemblies 19, 20 and 21; alkaline downregulated; repressed by nitric oxide; virulence-group-correlated expression	T210A	A627G	orf19.3175-P	1	NOISE
Ca21chr5_C_albicans_SC5314	454145	A	G	94	78	17	39	orf19.3169		orf19.10678|IPF18725.1|IPF3177.2|Contig4-2939_0002|orf6.1235|orf6.2669|CA1257|CaO19.3169|IPF18725	ORF|Uncharacterized	S. cerevisiae ortholog YOR262W has role in establishment of mitotic sister chromatid cohesion and localizes to cytoplasm	V253V	A758G	orf19.3169-P	1	NOISE
Ca21chr5_C_albicans_SC5314	524733	G	T	12	53	1	17								UPSTREAM:orf19.4243-P	1	NOISE
Ca21chr5_C_albicans_SC5314	534338	A	G	60	54	16	40	orf19.4250		orf19.11725|IPF6876.1|IPF17588.1|Contig4-1624_0004|Contig4-2928_0009|orf6.3974|orf6.6595|CA4128|CaO19.4250|IPF6876	ORF|Uncharacterized		*138*	A413G	orf19.4250-P	1	NOISE
Ca21chr5_C_albicans_SC5314	540520	T	G	135	4	53	12	orf19.4253		orf19.11728|IPF22943.1|IPF6871.1|Contig4-2928_0013|Contig4-2928_0014|orf6.3971|CA2182|CaO19.11728|CaO19.4253|IPF6871	ORF|Uncharacterized		G537G	T1610G	orf19.4253-P	1	NOISE
Ca21chr5_C_albicans_SC5314	552123	C	T	152	14	66	12	orf19.4257	INT1	orf19.11733|BUD4|orf6.3968|IPF19580.2|IPF28466.1|Contig4-2319_0007|orf6.1732|orf6.358|CA0665|CaO19.4257|IPF19580.1	ORF|Verified	Integrin-like protein; role in morphogenesis, adhesion, and mouse cecal colonization and systemic virulence; similar to S. cerevisiae Bud4p; structurally similar to alpha-subunit of human leukocyte integrins; Hap43p-induced gene	H1338Y	C4011T	orf19.4257-P	1	NOISE
Ca21chr5_C_albicans_SC5314	559438	T	G	152	0	56	8	orf19.4263		orf19.11739|IPF22980.1|IPF15189.2|orf6.1032|CA0269|CaO19.4263|CaO19.11739|PUF2.5f|PUF2.exon1	ORF|Uncharacterized		H354Q	T1061G	orf19.4263-P	1	NOISE
Ca21chr5_C_albicans_SC5314	565683	G	A	60	66	10	28	orf19.4265	UAP1	orf19.11741|YDL103|IPF22969.1|IPF9521.2|Contig4-2550_0010|orf6.3492|CA1826|QRI1|CaO19.11741|CaO19.4265	ORF|Verified	UDP-N-acetylglucosamine pyrophosphorylase, catalyzes biosynthesis of UDP-N-acetylglucosamine from UTP and N-acetylglucosamine 1-phosphate; functional homolog of S. cerevisiae Qri1p; alkaline upregulated	L202L	G605A	orf19.4265-P	1	NOISE
Ca21chr5_C_albicans_SC5314	566884	A	G	80	73	15	37	orf19.4266	SPR28	orf19.11742|orf19.11743|IPF23010.1|IPF22929.1|IPF23006.1|IPF9524.1|IPF9523.1|IPF9522.1|Contig4-2550_0005|Contig4-2550_0008|Contig4-2550_0009|orf6.3491|orf6.3490|CA1823|orf19.4267|CA1824|IPF9522.53f	ORF|Uncharacterized	Septin; similar to S. cerevisiae meiotic/sporulation septin; mutant has no obvious phenotype; two introns with noncanonical branch site and 5' splice site, respectively; splicing inhibited upon exposure to alpha-factor	D324G	A970G	orf19.4266-P	1	NOISE
Ca21chr5_C_albicans_SC5314	648910	T	G	98	78	11	30	orf19.4316		orf19.11791|IPF14663.2|IPF19388.2|Contig4-2700_0002|orf6.222|orf6.3168|CA1591|BBH2|CaO19.4316|IPF14663	ORF|Verified	Trimethyllysine dioxygenase, the first enzyme in the carnitine biosynthesis pathway; hyphal-induced expression, regulated by Cyr1p, Ras1p, Efg1p	D120E	T359G	orf19.4316-P	1	NOISE
Ca21chr5_C_albicans_SC5314	654935	G	A	90	65	11	29								UPSTREAM:orf19.4320-P	1	NOISE
Ca21chr5_C_albicans_SC5314	655495	T	C	39	45	10	33								UPSTREAM:orf19.4321-P	1	NOISE
Ca21chr5_C_albicans_SC5314	660346	A	G	135	11	39	6								UPSTREAM:orf19.4324-P	1	NOISE
Ca21chr5_C_albicans_SC5314	671833	C	T	153	2	36	10								UPSTREAM:orf19.4330-P	1	NOISE
Ca21chr5_C_albicans_SC5314	684226	T	C	70	82	14	34	orf19.4337		orf19.11813|IPF11698.1|IPF11341.2|IPF18701.2|Contig4-2570_0014|Contig4-2570_0016|orf6.1674|orf6.2794|orf6.2795|CA6284|CA0631|orf19.4338|IPF11698.3f	ORF|Uncharacterized	Predicted membrane transporter, member of the monocarboxylate porter (MCP) family, major facilitator superfamily (MFS)	H618H	T1853C	orf19.4337-P	1	NOISE
Ca21chr5_C_albicans_SC5314	755437	G	C	84	78	17	54	orf19.2647	ZCF14	orf19.10170|IPF18551.2|IPF13021.1|Contig4-2669_0003|orf6.3356|orf6.3816|orf6.1256|CA1726|CaO19.2647|IPF13021	ORF|Uncharacterized	Putative transcription factor with zinc cluster DNA-binding motif; caspofungin induced	E112Q	G333C	orf19.2647-P	1	NOISE
Ca21chr5_C_albicans_SC5314	772758	C	T	72	73	10	32	orf19.2638		orf19.10161|IPF6967.2|IPF18967.2|Contig4-2912_0019|orf6.1459|orf6.3825|CA2073|CaO19.2638|IPF6967	ORF|Uncharacterized		L240L	C717T	orf19.2638-P	1	NOISE
Ca21chr5_C_albicans_SC5314	781019	A	C	112	4	56	11	orf19.6656	DUR3	IPF2277.1|Contig4-3038_0003|orf6.6765|CA4263|CaO19.6656|IPF2277	ORF|Uncharacterized	Putative urea transporter; transcription is upregulated in clinical isolates from HIV+ patients with oral candidiasis; alkaline downregulated; amphotericin B induced; shows colony morphology-related gene regulation by Ssn6p	G412G	A1235C	orf19.6656-P	1	NOISE
Ca21chr5_C_albicans_SC5314	801317	A	C	116	2	82	10	orf19.6671	LAP4	IPF2303.2|Contig4-3038_0025|orf6.6780|CA4274|LAP5|CaO19.6671|LAP42	ORF|Verified	Protein similar to aminopeptidase I; mutation confers hypersensitivity to amphotericin B; transcriptionally regulated during macrophage response; biofilm-induced	I69I	A206C	orf19.6671-P	1	NOISE
Ca21chr5_C_albicans_SC5314	826448	A	C	81	77	12	42								UPSTREAM:orf19.1123-P	1	NOISE
Ca21chr5_C_albicans_SC5314	831100	C	T	74	75	26	56	orf19.1119	MTR10	orf19.8717|IPF13881.3|IPF6321.2|orf6.3471|orf6.487|orf6.488|CA1811|CaO19.1119	ORF|Uncharacterized	Putative importin, member of a family of fungal-specific nuclear importins; transcription is regulated by Mig1p	S816S	C2447T	orf19.1119-P	1	NOISE
Ca21chr5_C_albicans_SC5314	837776	A	T	66	85	22	53	orf19.1115	GUK1	orf19.8712|IPF26196.1|IPF6326.2|Contig4-2766_0012|orf6.3467|CA1808|CaO19.8712|CaO19.1115	ORF|Uncharacterized	Putative guanylate kinase; identified in extracts from biofilm and planktonic cells; protein level decrease in stationary phase cultures; Hap43p-induced gene	P31P	A92T	orf19.1115-P	1	NOISE
Ca21chr5_C_albicans_SC5314	844452	C	T	78	81	22	47	orf19.1110		orf19.8707|IPF6335.2|IPF6334.3|Contig4-2815_0022|Contig4-2815_0023|orf6.2986|CA1462|THI80|CaO19.1110	ORF|Verified	Thiamine pyrophosphokinase, phosphorylates thiamine to produce the coenzyme thiamine pyrophosphate (thiamine diphosphate); active as a homodimer	N100N	C299T	orf19.1110-P	1	NOISE
Ca21chr5_C_albicans_SC5314	855049	A	T	44	51	15	37								UPSTREAM:orf19.1105.2-P	1	NOISE
Ca21chr5_C_albicans_SC5314	856957	C	G	55	44	4	20								UPSTREAM:orf19.1105.3-P	1	NOISE
Ca21chr5_C_albicans_SC5314	864310	G	A	79	69	18	41	orf19.3218		orf19.10729|IPF14540|IPF24097.1|IPF14540.2|Contig4-2205_0008|orf6.3199|CA1615|CaO19.3218|CaO19.10729	ORF|Uncharacterized	Putative multidrug resistance protein; upregulated by Efg1p	*294*	G881A	orf19.3218-P	1	NOISE
Ca21chr5_C_albicans_SC5314	869267	C	G	144	13	67	11	orf19.3216		orf19.10728|orf6.243|IPF18645.1|IPF12592.3|Contig4-2220_0003|orf6.3198|CA1614|CaO19.3216|IPF18645	ORF|Uncharacterized	Similar to Rab GTPase activators; Hap43p-induced gene	P185A	C552G	orf19.3216-P	1	NOISE
Ca21chr5_C_albicans_SC5314	872035	T	C	76	67	20	47								UPSTREAM:orf19.3215-P	1	NOISE
Ca21chr5_C_albicans_SC5314	873470	C	T	67	47	29	59								UPSTREAM:orf19.3214-P	1	NOISE
Ca21chr5_C_albicans_SC5314	877058	G	A	113	9	36	12	orf19.3213		orf19.10725|IPF24092.1|IPF12819.3|Contig4-2443_0003|orf6.3195|orf6.495|orf6.847|CA0094|CaO19.3213|IPF12819|IPF12819.2	ORF|Uncharacterized		G179S	G534A	orf19.3213-P	1	NOISE
Ca21chr5_C_albicans_SC5314	889806	G	A	64	65	12	31								UPSTREAM:orf19.3209-P	1	NOISE
Ca21chr5_C_albicans_SC5314	916521	T	C	82	88	22	50								UPSTREAM:orf19.3893-P	1	NOISE
Ca21chr5_C_albicans_SC5314	917514	A	C	126	2	96	11	orf19.3893	SCW11	orf19.11374|orf6.2346|IPF23274.1|IPF15862.2|CA1053|SCW11.3eoc	ORF|Verified	Cell wall protein; transcription decreased in mutant lacking ACE2; downregulated in core caspofungin response; expression greater in high iron; possibly an essential gene, disruptants not obtained by UAU1 method; planktonic growth-induced	S210S	A629C	orf19.3893-P	1	NOISE
Ca21chr5_C_albicans_SC5314	925108	G	A	75	96	23	49	orf19.3897		orf19.11378|IPF23260.1|IPF19897.1|Contig4-2263_0011|orf6.2342|CA1050|CaO19.11378|CaO19.3897|IPF19897	ORF|Uncharacterized	Protein of unknown function; decreased transcription is observed upon fluphenazine treatment or in an azole-resistant strain that overexpresses CDR1 and CDR2; transcription is repressed in response to alpha pheromone in SpiderM medium	R141K	G421A	orf19.3897-P	1	NOISE
Ca21chr5_C_albicans_SC5314	926244	T	C	91	77	20	53								UPSTREAM:orf19.3899-P	1	NOISE
Ca21chr5_C_albicans_SC5314	928804	T	C	79	82	40	80	orf19.3900		orf19.11381|IPF20126.1|IPF20071.1|Contig4-2263_0006|orf6.2339|orf6.5148|CA3027|UGO1|CaO19.3900|IPF20126	ORF|Uncharacterized	S. cerevisiae ortholog UGO1 has role in mitochondrial genome maintenance, filamentous growth, mitochondrial fusion and localizes to mitochondrial outer membrane	R179R	T536C	orf19.3900-P	1	NOISE
Ca21chr5_C_albicans_SC5314	940526	T	C	68	66	16	40								UPSTREAM:orf19.3906-P	1	NOISE
Ca21chr5_C_albicans_SC5314	941284	G	A	74	83	22	55	orf19.3906		orf19.11387|IPF23302.1|IPF17640.2|orf6.5142|CA3021|CaO19.11387|CaO19.3906|IPF17640	ORF|Uncharacterized	Protein not essential for viability	S195N	G583A	orf19.3906-P	1	NOISE
Ca21chr5_C_albicans_SC5314	963332	A	G	80	75	25	54								UPSTREAM:orf19.3921-P	1	NOISE
Ca21chr5_C_albicans_SC5314	972200	A	C	151	1	64	11	orf19.3926	RNY11	orf19.11408|IPF23264.1|IPF10934.2|Contig4-2817_0009|orf6.4050|CA2231|CaO19.3926|CaO19.11408|IPF10934	ORF|Uncharacterized	S. cerevisiae ortholog RNY1 has endoribonuclease activity, has role in apoptosis, cell morphogenesis, RNA catabolic process and localizes to vacuole, extracellular region, cytosol	K186N	A557C	orf19.3926-P	1	NOISE
Ca21chr5_C_albicans_SC5314	978622	A	G	56	55	17	42								UPSTREAM:orf19.3931-P	1	NOISE
Ca21chr5_C_albicans_SC5314	981161	A	G	77	77	13	44								UPSTREAM:orf19.3932-P	1	NOISE
Ca21chr5_C_albicans_SC5314	984811	A	G	96	68	35	67	orf19.3936		orf19.11418|IPF23353.1|IPF10184.2|Contig4-2929_0005|Contig4-2929_0006|orf6.2299|CA1025|CaO19.3936|IPF10184	ORF|Verified	Putative glycerophosphocholine phosphodiesterase; mutation confers hypersensitivity to 5-fluorouracil (5-FU); induced upon biofilm formation	P210P	A629G	orf19.3936-P	1	NOISE
Ca21chr5_C_albicans_SC5314	990142	C	A	73	81	26	55								UPSTREAM:orf19.3939-P	1	NOISE
Ca21chr5_C_albicans_SC5314	997730	T	A	96	77	30	60	orf19.3942.1	RPL43A	IPF23373.1|IPF20087.1|Contig4-2929_0019|CA1637|RPL43A.3	ORF|Uncharacterized	Putative ribosomal protein, large subunit; downregulated in the presence of human whole blood or polymorphonuclear (PMN) cells; shows colony morphology-related gene regulation by Ssn6p	Intronic	Intronic	orf19.3942.1-P	1	NOISE
Ca21chr5_C_albicans_SC5314	1004650	A	G	123	1	40	6								UPSTREAM:orf19.3946-P	1	NOISE
Ca21chr5_C_albicans_SC5314	1022020	G	A	82	73	16	41	orf19.3955	MES1	orf19.11437|IPF15550.2|IPF28546.1|Contig4-1832_0002|orf6.182|orf6.2278|CA1014|CaO19.3955	ORF|Uncharacterized	Cytoplasmic methionyl-tRNA synthetase; zinc-binding motif; ribosomal subunits, translation factors, tRNA synthetases are downregulated upon phagocytosis by murine macrophage; protein present in exponential and stationary phase yeast	T143T	G428A	orf19.3955-P	1	NOISE
Ca21chr5_C_albicans_SC5314	1028828	G	T	71	69	38	83	orf19.3959	SSD1	orf19.11441|IPF18942.2|IPF5791.2|Contig4-3081_0004|orf6.1117|orf6.1554|CA0317|CaO19.3959	ORF|Verified	Protein with role in resistance to host antimicrobial peptides; virulence role in murine infection; functional homolog of S. cerevisiae Ssd1p, which suppresses various mutant phenotypes; constitutively expressed and not cell-cycle regulated	P230P	G689T	orf19.3959-P	1	NOISE
Ca21chr5_C_albicans_SC5314	1038117	C	T	77	77	28	70	orf19.3965		orf19.11447|IPF18603.2|IPF5773.2|Contig4-3081_0013|orf6.3506|CA1836|CaO19.11447|CaO19.3965|IPF5773	ORF|Uncharacterized		F206F	C617T	orf19.3965-P	1	NOISE
Ca21chr5_C_albicans_SC5314	1061230	C	T	34	45	22	48	orf19.3973		orf19.11456|IPF23285.1|IPF13621.2|Contig4-3081_0047|orf6.5649|CA3398|CaO19.11456|CaO19.3973|IPF13621	ORF|Uncharacterized	Late-stage biofilm-induced gene	S32L	C94T	orf19.3973-P	1	NOISE
Ca21chr5_C_albicans_SC5314	1064787	G	A	57	73	15	48	orf19.3976		orf19.11459|IPF23268.1|IPF13623.2|Contig4-3081_0052|orf6.5652|CA3400|JNM1|CaO19.3976|CaO19.11459	ORF|Uncharacterized		*202*	G604A	orf19.3976-P	1	NOISE
Ca21chr5_C_albicans_SC5314	1067497	C	A	56	80	12	38	orf19.3978		orf19.11461|IPF23296.1|IPF8651.2|Contig4-1327_0001|orf6.5654|CA3402|CaO19.3978|CaO19.11461|IPF8651	ORF|Uncharacterized	S. cerevisiae ortholog EFG1 has role in maturation of SSU-rRNA from tricistronic rRNA transcript (SSU-rRNA, 5.8S rRNA, LSU-rRNA), G1 phase of mitotic cell cycle and localizes to nucleolus	R174R	C521A	orf19.3978-P	1	NOISE
Ca21chr5_C_albicans_SC5314	1068301	T	C	93	83	23	57	orf19.3980		orf19.11463|IPF23311.1|IPF8650.2|Contig4-1327_0003|orf6.5656|CA3403|CaO19.11463|SLH1|CaO19.3980|IPF8650	ORF|Uncharacterized	S. cerevisiae ortholog SLH1 has role in regulation of translation and localizes to cytoplasm	C1807R	T5418C	orf19.3980-P	1	NOISE
Ca21chr5_C_albicans_SC5314	1087180	T	C	114	10	55	10								UPSTREAM:orf19.3984-P	1	NOISE
Ca21chr5_C_albicans_SC5314	1089000	T	C	83	59	23	49	orf19.3984		orf19.11467|IPF19142.1|IPF18339.2|orf6.5660|orf6.7397|orf6.794|CA0184|IPF19142	ORF|Uncharacterized	Protein of unknown function; induced in core caspofungin response; expression upregulated in an ssr1 null mutant; induced by nitric oxide independent of Yhb1p	N147N	T440C	orf19.3984-P	1	NOISE
Ca21chr5_C_albicans_SC5314	1096880	T	G	88	82	35	69	orf19.3988		orf19.11471|IPF23230.1|IPF9655.1|Contig4-2740_0007|orf6.7401|CA4759|CaO19.11471|CaO19.3988|IPF9655	ORF|Uncharacterized	Putative adhesin-like protein; transcriptionally activated by Mnl1p under weak acid stress	P393P	T1178G	orf19.3988-P	1	NOISE
Ca21chr5_C_albicans_SC5314	1101617	G	A	65	76	21	52	orf19.3994		orf19.11477|IPF23265.1|IPF9647.2|Contig4-2740_0015|Contig4-2740_0016|Contig4-2740_0017|orf6.7407|CA4762|OST3|CaO19.3994|CaO19.11477|IPF9647	ORF|Uncharacterized	S. cerevisiae ortholog OST3 has dolichyl-diphosphooligosaccharide-protein glycotransferase activity and has role in protein N-linked glycosylation, protein complex assembly	R287R	G860A	orf19.3994-P	1	NOISE
Ca21chr5_C_albicans_SC5314	1107167	A	C	72	113	26	56								UPSTREAM:orf19.3997-P	1	NOISE
Ca21chr5_C_albicans_SC5314	1114712	T	G	121	2	32	11								UPSTREAM:orf19.4000-P	1	NOISE
Ca21chr5_C_albicans_SC5314	1155865	A	G	130	0	82	12	orf19.4029		orf19.11512|IPF23256.1|IPF3377.1|Contig4-3094_0019|orf6.7442|CA4794|CaO19.4029|SQT1|CaO19.11512	ORF|Uncharacterized	S. cerevisiae ortholog SQT1 has role in ribosomal large subunit assembly and localizes to cytosolic ribosome, cytosol	E24G	A70G	orf19.4029-P	1	NOISE
Ca21chr6_C_albicans_SC5314	16518	A	C	103	2	52	7	orf19.6323	HPA2	IPF14291.1|Contig4-2795_0013|orf6.5516|CA3289|CaO19.6323|HPA3	ORF|Uncharacterized	S. cerevisiae ortholog HPA3 has D-amino-acid N-acetyltransferase activity, has role in D-amino acid metabolic process and localizes to cytoplasm, nucleus	N26H	A75C	orf19.6323-P	1	NOISE
Ca21chr6_C_albicans_SC5314	17853	A	G	77	68	52	97	orf19.6322	ARD	ARDH|ARD8|IPF14294.1|Contig4-2795_0014|orf6.5515|CA3288|ARD1|CaO19.6322	ORF|Verified	D-arabitol dehydrogenase, NAD-dependent (ArDH); enzyme of D-arabitol and D-arabinose catabolism; D-arabitol is a marker for active infection in humans; has conserved YXXXK motif of short-chain alcohol-polyol-sugar dehydrogenases	T189A	A564G	orf19.6322-P	1	NOISE
Ca21chr6_C_albicans_SC5314	23104	G	A	59	63	25	61	orf19.1179		orf6.819|IPF19608.1|IPF19609.1|orf6.1745|CA0674|CaO19.1179|IPF19608	ORF|Uncharacterized	Transcriptionally regulated by iron; expression greater in high iron; possibly subject to Kex2p processing; Hap43p-repressed gene	T46T	G137A	orf19.1179-P	1	NOISE
Ca21chr6_C_albicans_SC5314	55047	A	G	72	78	43	87	orf19.1193	GNP1	orf19.8784|AGP1|IPF7152.2|IPF29546.1|Contig4-3055_0022|orf6.2846|orf6.4630|GNP2|CA1373|CaO19.1193	ORF|Uncharacterized	Protein similar to asparagine and glutamine permease; fluconazole or caspofungin induced; transcription is regulated by Nrg1p, Mig1p, Tup1p, Gcn2p, Gcn4p, and alkaline regulated by Rim101p; biofilm-induced; fungal-specific	V360V	A1079G	orf19.1193-P	1	NOISE
Ca21chr6_C_albicans_SC5314	59821	A	G	88	64	20	53	orf19.1195		orf19.8786|IPF26128.1|IPF7154.2|Contig4-3055_0020|orf6.2848|CA1374|CaO19.1195|OCT1|MIP1|CaO19.8786	ORF|Uncharacterized	S. cerevisiae ortholog OCT1 has metalloendopeptidase activity, has role in protein processing involved in protein targeting to mitochondrion, cellular iron ion homeostasis and localizes to mitochondrion	T63T	A188G	orf19.1195-P	1	NOISE
Ca21chr6_C_albicans_SC5314	64653	A	G	72	62	15	69	orf19.1199	NOP5	orf19.8790|IPF18691.2|IPF7161.1|NOP58|Contig4-3055_0011|Contig4-3055_0012|orf6.2852|orf6.2946|CA1438|CaO19.1199	ORF|Verified	Protein similar to S. cerevisiae Nop5p protein of small nucleolar ribonucleoprotein complex; transposon mutation affects filamentous growth; macrophage/pseudohyphal-induced; physically interacts with TAP-tagged Nop1p	S461S	A1382G	orf19.1199-P	1	NOISE
Ca21chr6_C_albicans_SC5314	66176	T	C	76	93	25	53								UPSTREAM:orf19.1199-P	1	NOISE
Ca21chr6_C_albicans_SC5314	68963	T	C	66	66	24	63	orf19.1201		orf19.8792|IPF26135.1|IPF7165.1|Contig4-3055_0008|orf6.2944|CA1436|CaO19.1201|DIA4|IPF7165	ORF|Uncharacterized	S. cerevisiae ortholog DIA4 has serine-tRNA ligase activity, has role in invasive growth in response to glucose limitation, pseudohyphal growth, mitochondrial seryl-tRNA aminoacylation and localizes to mitochondrion	N471N	T1412C	orf19.1201-P	1	NOISE
Ca21chr6_C_albicans_SC5314	70876	T	C	55	60	38	74	orf19.1203	SRO77	orf19.8794|IPF26148.1|IPF12463.2|Contig4-3055_0006|orf6.2942|CA1434|CaO19.1203|CaO19.8794|SNI2	ORF|Uncharacterized	Protein with a predicted role in docking and fusion of post-Golgi vesicles with the plasma membrane; filament induced; fungal-specific (no human or murine homolog)	C1003R	T3006C	orf19.1203-P	1	NOISE
Ca21chr6_C_albicans_SC5314	76130	A	G	91	76	22	65	orf19.1204		orf19.8795|IPF26134.1|IPF12465.2|Contig4-3055_0002|orf6.2941|CA1432|CaO19.8795|APM3|CaO19.1204	ORF|Uncharacterized	Phosphorylated protein of unknown function, transcription is upregulated clinical isolates from HIV positive patients with oral candidiasis	*16*	A47G	orf19.1204-P	1	NOISE
Ca21chr6_C_albicans_SC5314	77919	T	C	92	83	34	74	orf19.4215	FET34	orf19.11691|orf19.8797|orf6.5006|orf6.2939|IPF26138.1|IPF12467.2|IPF23068.1|IPF17039.1|FET5|FET34.3eoc|CA1431|CA2920|orf19.1206|FET35|FET5.5eoc	ORF|Uncharacterized	Putative multicopper ferroxidase; expression greater in low iron and reduced in a fluconazole-resistant isolate; downregulated by Sfu1p, Hog1p; alkaline upregulated by Rim101p; ciclopirox olamine, ketoconazole and hypoxia induced	F223F	T668C	orf19.4215-P	1	NOISE
Ca21chr6_C_albicans_SC5314	80256	G	A	65	72	43	82	orf19.4213	FET31	FET33|IPF17035.2|IPF11903.2|orf6.789|CA2922|CaO19.4213|orf6.5008	ORF|Uncharacterized	Putative iron transport multicopper oxidase precursor; flucytosine induced; caspofungin repressed	*617*	G1849A	orf19.4213-P	1	NOISE
Ca21chr6_C_albicans_SC5314	83638	A	G	135	0	56	8								UPSTREAM:orf19.4213-P	1	NOISE
Ca21chr6_C_albicans_SC5314	95459	C	T	63	65	17	58								UPSTREAM:orf19.4209-P	1	NOISE
Ca21chr6_C_albicans_SC5314	98755	A	C	170	0	89	13	orf19.4206		orf19.11682|IPF23059.1|IPF7838.1|Contig4-2854_0012|orf6.5015|CA2929|CaO19.11682|MUS81|CaO19.4206|IPF7838	ORF|Uncharacterized	S. cerevisiae ortholog MUS81 has crossover junction endodeoxyribonuclease activity and has role in DNA repair, DNA topological change, resolution of meiotic recombination intermediates	T64P	A189C	orf19.4206-P	1	NOISE
Ca21chr6_C_albicans_SC5314	115194	T	A	71	69	26	54	orf19.4193.1	RPS13	IPF23071.1|IPF13509.2|Contig4-2373_0006|CA1304|RPS13.3	ORF|Uncharacterized	Putative ribosomal protein of the small subunit	Intronic	Intronic	orf19.4193.1-P	1	NOISE
Ca21chr6_C_albicans_SC5314	119361	G	T	85	61	31	61								UPSTREAM:orf19.4192.1-P	1	NOISE
Ca21chr6_C_albicans_SC5314	125319	T	C	65	60	11	40	orf19.3656	COX15	orf19.11140|IPF23635.1|IPF13028.2|Contig4-2704_0006|orf6.3305|CA1688|CaO19.3656|CaO19.11140	ORF|Verified	Cytochrome oxidase assembly protein; transcription is regulated by Nrg1p and Tup1p; alkaline downregulated; Hap43p-repressed gene; early-stage biofilm-induced gene	F230F	T689C	orf19.3656-P	1	NOISE
Ca21chr6_C_albicans_SC5314	133426	A	G	73	44	19	47								UPSTREAM:orf19.3651-P	1	NOISE
Ca21chr6_C_albicans_SC5314	166438	T	C	77	74	29	58								UPSTREAM:orf19.86-P	1	NOISE
Ca21chr6_C_albicans_SC5314	171647	A	C	51	60	23	49								UPSTREAM:orf19.88-P	1	NOISE
Ca21chr6_C_albicans_SC5314	172267	T	C	81	65	28	56								UPSTREAM:orf19.89-P	1	NOISE
Ca21chr6_C_albicans_SC5314	183914	C	T	165	2	69	17	orf19.94		orf19.7740|IPF17606.2|IPF19749.1|orf6.3706|CA1988|CaO19.94|CaO19.7740|IPF19749	ORF|Uncharacterized		Q76*	C225T	orf19.94-P	1	NOISE
Ca21chr6_C_albicans_SC5314	192865	A	T	70	60	9	28								UPSTREAM:orf19.101-P	1	NOISE
Ca21chr6_C_albicans_SC5314	219614	T	G	85	0	41	6								UPSTREAM:orf19.120-P	1	NOISE
Ca21chr6_C_albicans_SC5314	229204	C	G	69	66	12	33	orf19.124	CIC1	orf19.7771|IPF27169.1|IPF7046.2|Contig4-2900_0027|orf6.137|orf6.2607|CA0020|CaO19.124|IPF7046	ORF|Uncharacterized	Putative proteasome-interacting protein; transcription is upregulated in both intermediate and mature biofilms	S362S	C1085G	orf19.124-P	1	NOISE
Ca21chr6_C_albicans_SC5314	249891	C	G	47	49	28	65	orf19.136		orf19.7780|IPF16599.3|IPF7020.2|Contig4-2900_0029|orf6.3478|orf6.459|CA1816|QDR3|CaO19.136|IPF7020	ORF|Uncharacterized	Predicted membrane transporter, member of the drug:proton antiporter (12 spanner) (DHA1) family, major facilitator superfamily (MFS); Hap43p-repressed gene	L71S	C212G	orf19.136-P	1	NOISE
Ca21chr6_C_albicans_SC5314	253155	C	T	64	64	17	49								UPSTREAM:orf19.138-P	1	NOISE
Ca21chr6_C_albicans_SC5314	275794	T	C	84	90	14	41	orf19.3446		orf19.10950|IPF23844.1|IPF5327.2|Contig4-2814_0004|orf6.6459|CA4018|MOG1|CaO19.3446|CaO19.10950	ORF|Uncharacterized	S. cerevisiae ortholog MOG1 has Ran GTPase binding, has role in protein import into nucleus and localizes to nucleus	F142F	T425C	orf19.3446-P	1	NOISE
Ca21chr6_C_albicans_SC5314	290079	G	A	60	73	21	50	orf19.3439		orf19.10943|IPF23841.1|IPF7182.2|Contig4-2644_0006|orf6.6466|CA4024|CaO19.10943|CaO19.3439|IPF7182	ORF|Uncharacterized	Predicted ORF in Assemblies 19, 20 and 21; greater mRNA abundance observed in a cyr1 homozygous null mutant than in wild type	K124K	G371A	orf19.3439-P	1	NOISE
Ca21chr6_C_albicans_SC5314	293069	A	C	81	83	25	68	orf19.3438		orf19.10942|IPF23837.1|IPF7178.2|Contig4-2644_0011|orf6.6467|CA4025|CaO19.10942|SCJ1|CaO19.3438	ORF|Uncharacterized	S. cerevisiae ortholog SCJ1 has chaperone binding, has role in ER-associated protein catabolic process, protein folding, response to unfolded protein and localizes to endoplasmic reticulum lumen	S298S	A893C	orf19.3438-P	1	NOISE
Ca21chr6_C_albicans_SC5314	296562	C	T	69	73	17	42								UPSTREAM:orf19.3436-P	1	NOISE
Ca21chr6_C_albicans_SC5314	307249	G	A	67	65	23	49	orf19.3432		orf19.10936|IPF23823.1|IPF11077.2|Contig4-2589_0012|orf6.6473|CA4031|CaO19.10936|CaO19.3432|IPF11077	ORF|Uncharacterized	Predicted membrane transporter, member of the drug:proton antiporter (12 spanner) (DHA1) family, major facilitator superfamily (MFS); induced by nitric oxide	P164P	G491A	orf19.3432-P	1	NOISE
Ca21chr6_C_albicans_SC5314	319737	A	T	58	44	5	31								UPSTREAM:orf19.3430-P	1	NOISE
Ca21chr6_C_albicans_SC5314	321523	A	G	55	53	20	47								UPSTREAM:orf19.3431-P	1	NOISE
Ca21chr6_C_albicans_SC5314	329966	C	T	124	11	117	17	orf19.3428		orf19.10932|IPF23827.1|IPF7377.1|Contig4-2308_0006|orf6.6097|CA3750|CaO19.3428|CaO19.10932|IPF7377	ORF|Uncharacterized	Putative protein of unknown function; late-stage biofilm-induced gene	T482T	C1445T	orf19.3428-P	1	NOISE
Ca21chr6_C_albicans_SC5314	330709	T	C	64	0	41	9								UPSTREAM:orf19.3426-P	1	NOISE
Ca21chr6_C_albicans_SC5314	338347	T	C	77	65	29	59	orf19.3423	TIF3	orf19.10927|IPF23831.1|IPF16643.2|Contig4-2520_0017|orf6.6102|CA3754|CaO19.3423|CaO19.10927	ORF|Uncharacterized	Putative translation initiation factor; genes encoding ribosomal subunits, translation factors, and tRNA synthetases are downregulated upon phagocytosis by murine macrophage	G353G	T1058C	orf19.3423-P	1	NOISE
Ca21chr6_C_albicans_SC5314	340355	C	T	72	70	20	47								UPSTREAM:orf19.3419-P	1	NOISE
Ca21chr6_C_albicans_SC5314	348838	C	T	82	66	27	71	orf19.3420		orf19.10924|IPF23862.1|IPF28763.1|Contig4-2903_0003|orf6.6105|CaO19.10924|CaO19.3420	ORF|Dubious	Predicted ORF in Assemblies 19, 20 and 21; decreased expression in hyphae compared to yeast-form cells	N14N	C41T	orf19.3420-P	1	NOISE
Ca21chr6_C_albicans_SC5314	364696	A	G	77	74	29	91	orf19.3414	SUR7	orf19.10917|IPF12442.1|IPF12038.2|Contig4-2923_0010|orf6.360|CA0055|CaO19.10917|CaO19.3414|IPF12442	ORF|Verified	Protein required for normal cell wall, plasma membrane, cytoskeletal organization, endocytosis; localizes to eisosome subdomains of plasma membrane; four transmembrane motifs; mutant shows ectopic, chitin-rich cell wall; fluconazole-induced	E127E	A380G	orf19.3414-P	1	NOISE
Ca21chr6_C_albicans_SC5314	367822	A	G	75	84	24	51	orf19.3412	ATG15	orf19.10915|IPF23816.1|IPF12033.2|Contig4-2923_0017|orf6.2101|CA0901|CaO19.3412|CaO19.10915|IPF12033	ORF|Uncharacterized	Putative lipase; fungal-specific (no human or murine homolog); Hap43p-repressed gene	Q159R	A475G	orf19.3412-P	1	NOISE
Ca21chr6_C_albicans_SC5314	368431	C	T	118	0	47	7								UPSTREAM:orf19.3412-P	1	NOISE
Ca21chr6_C_albicans_SC5314	373745	T	C	77	66	34	101	orf19.3407		orf19.10910|IPF23836.1|IPF9901.1|Contig4-2923_0023|orf6.4324|CA2426|CaO19.3407|RAD18|CaO19.10910|IPF9901	ORF|Uncharacterized	Putative transcription factor with zinc finger DNA-binding motif; Hap43p-repressed gene	Y321Y	T962C	orf19.3407-P	1	NOISE
Ca21chr6_C_albicans_SC5314	373930	T	C	61	59	22	59								UPSTREAM:orf19.3411-P	1	NOISE
Ca21chr6_C_albicans_SC5314	378968	C	T	70	86	17	48								UPSTREAM:orf19.3404-P	1	NOISE
Ca21chr6_C_albicans_SC5314	380551	T	C	84	90	32	74								UPSTREAM:orf19.3401-P	1	NOISE
Ca21chr6_C_albicans_SC5314	380565	A	C	76	84	32	69	orf19.3402	FPG1	orf19.10905|IPF23838.1|IPF12950.2|Contig4-2230_0006|Contig4-2399_0005|orf6.4329|CA2430|FDG1|CaO19.3402|CaO19.10905|IPF12950	ORF|Verified	Formamidopyrimidine DNA glycosylase, involved in repair of gamma-irradiated DNA; Hap43p-repressed gene	K373Q	A1116C	orf19.3402-P	1	NOISE
Ca21chr6_C_albicans_SC5314	381824	A	G	84	62	22	51								UPSTREAM:orf19.3402-P	1	NOISE
Ca21chr6_C_albicans_SC5314	386615	A	G	75	92	32	67	orf19.3396	HCH1	orf19.10899|IPF23860.1|IPF9484.2|Contig4-2516_0001|orf6.4335|CA2434|IPF9484	ORF|Uncharacterized	Protein not essential for viability; regulated by Gcn4p; induced in response to amino acid starvation (3-aminotriazole treatment); similar to S. cerevisiae Hch1p, which is a regulator of heat shock protein Hsp90p	Intronic	Intronic	orf19.3396-P	1	NOISE
Ca21chr6_C_albicans_SC5314	388196	A	G	73	51	37	82	orf19.3395		orf19.10898|IPF9483.2|IPF9481.3|Contig4-2516_0002|orf6.4336|CA2435|CaO19.3395|IPF9483	ORF|Uncharacterized	Predicted membrane transporter, member of the drug:proton antiporter (12 spanner) (DHA1) family, major facilitator superfamily; induced by nitric oxide, oxidative stress, alpha pheromone; fungal-specific; Hap43p-repressed	*71W	A212G	orf19.3395-P	1	NOISE
Ca21chr6_C_albicans_SC5314	389288	G	A	77	51	22	63								UPSTREAM:orf19.3394-P	1	NOISE
Ca21chr6_C_albicans_SC5314	389759	G	A	56	71	14	54	orf19.3394		orf19.10897|IPF18467.2|IPF9480.1|Contig4-2516_0006|orf6.1807|orf6.4337|CA0714|CaO19.3394|CaO19.10897|IPF9480	ORF|Uncharacterized	Predicted ORF in Assemblies 19, 20 and 21; transcription is induced in response to alpha pheromone in SpiderM medium	G134G	G401A	orf19.3394-P	1	NOISE
Ca21chr6_C_albicans_SC5314	392795	A	G	74	70	28	74	orf19.3392	DOG1	orf19.10895|IPF23846.1|IPF9474.2|DOG2|Contig4-1966_0001|Contig4-2516_0009|orf6.1809|CA0716|CaO19.3392|CaO19.10895	ORF|Uncharacterized	Putative 2-deoxyglucose-6-phosphatase; haloacid dehalogenase hydrolase/phosphatase superfamily; similar to S. cerevisiae Dog1p, Dog2p, Hor1p, and Rhr2p; regulated by Nrg1p, Tup1p	I4M	A11G	orf19.3392-P	1	NOISE
Ca21chr6_C_albicans_SC5314	393366	G	A	72	66	12	34								UPSTREAM:orf19.3391-P	1	NOISE
Ca21chr6_C_albicans_SC5314	396164	G	A	77	63	23	48	orf19.684		orf19.8302|orf19.10893|IPF23861.1|IPF16687.2|IPF26627.1|IPF9470.2|Contig4-2154_0003|orf6.3695|orf6.1811|CA1981|orf19.3390|CaO19.8302|PCF11|CaO19.684|IPF9470	ORF|Verified	Putative transcription factor with zinc finger DNA-binding motif; heterozygous null mutant exhibits hypersensitivity to parnafungin and cordycepin in the C. albicans fitness test	V41V	G122A	orf19.684-P	1	NOISE
Ca21chr6_C_albicans_SC5314	396564	T	C	68	62	20	49								UPSTREAM:orf19.684-P	1	NOISE
Ca21chr6_C_albicans_SC5314	398843	C	A	63	62	30	66	orf19.685.1			ORF|Uncharacterized		I33I	C98A	orf19.685.1-P	1	NOISE
Ca21chr6_C_albicans_SC5314	404711	A	G	73	68	28	58								UPSTREAM:orf19.688-P	1	NOISE
Ca21chr6_C_albicans_SC5314	405755	C	T	54	54	25	70								UPSTREAM:orf19.689-P	1	NOISE
Ca21chr6_C_albicans_SC5314	410241	A	G	83	56	29	61	orf19.690	PLB2	orf19.8309|IPF11981.1|IPF29741.1|Contig4-2418_0004|orf6.1985|CA0825|CaO19.8309|CaO19.690	ORF|Uncharacterized	Putative phospholipase B; conserved catalytic region; 6 putative N-glycosylation motifs; predicted secretion signal; no GPI anchor predicted; fungal-specific (no human or murine homolog)	S273S	A818G	orf19.690-P	1	NOISE
Ca21chr6_C_albicans_SC5314	446034	A	G	73	62	10	34	orf19.3453		orf19.10957|IPF23775.1|IPF9785.2|Contig4-2892_0004|orf6.1812|CA0717|CaO19.10957|CaO19.3453|IPF9785	ORF|Uncharacterized		N454D	A1359G	orf19.3453-P	1	NOISE
Ca21chr6_C_albicans_SC5314	451030	A	G	72	76	28	64	orf19.3456		orf19.10960|IPF23784.1|IPF9779.2|Contig4-2892_0008|Contig4-2892_0009|orf6.1815|CA0719|CaO19.3456|IPF9779.5	ORF|Uncharacterized	Predicted ORF in Assemblies 19, 20 and 21; possibly an essential gene, disruptants not obtained by UAU1 method	H480R	A1438G	orf19.3456-P	1	NOISE
Ca21chr6_C_albicans_SC5314	453524	T	G	106	5	27	6	orf19.3458		orf19.10962|IPF9777.2|IPF17934.2|Contig4-2892_0013|orf6.1817|orf6.3761|CA2026|CaO19.3458|IPF9777	ORF|Uncharacterized	S. cerevisiae ortholog VPS68 has role in late endosome to vacuole transport via multivesicular body sorting pathway, protein targeting to vacuole and localizes to Vps55/Vps68 complex, fungal-type vacuole membrane, mitochondrion	G122G	T365G	orf19.3458-P	1	NOISE
Ca21chr6_C_albicans_SC5314	455330	G	C	77	69	33	72	orf19.3459		orf19.10963|IPF9776.2|IPF28754.1|Contig4-2892_0016|orf6.3762|CA2027|MCK1|CaO19.3459|CaO19.10963	ORF|Uncharacterized	Putative serine/threonine/tyrosine (dual-specificity) kinase; possibly an essential gene, disruptants not obtained by UAU1 method	L70F	G209C	orf19.3459-P	1	NOISE
Ca21chr6_C_albicans_SC5314	460303	T	C	125	1	96	11	orf19.3461		orf19.10965|IPF23797.1|IPF14968.2|Contig4-2623_0003|orf6.3764|orf6.995|CA0254|CaO19.3461|IPF14968	ORF|Uncharacterized	Predicted ORF in Assemblies 19, 20 and 21; oxidative stress-induced via Cap1p; transcription is induced in response to alpha pheromone in SpiderM medium	S39S	T116C	orf19.3461-P	1	NOISE
Ca21chr6_C_albicans_SC5314	473784	G	A	98	6	44	7								UPSTREAM:orf19.3469-P	1	NOISE
Ca21chr6_C_albicans_SC5314	479405	A	G	73	56	16	45								UPSTREAM:orf19.3473-P	1	NOISE
Ca21chr6_C_albicans_SC5314	492308	T	C	78	84	15	55	orf19.3477		orf19.10981|orf19.10983|IPF23776.1|IPF23791.1|IPF11731.2|IPF11730.2|IPF23798.1|IPF11732.2|Contig4-2835_0002|Contig4-2835_0006|orf6.4982|orf6.4980|CA2901|CaO19.10983|PUS1|CaO19.3479|orf19.3479	ORF|Uncharacterized	S. cerevisiae ortholog PUS1 has pseudouridine synthase activity, has role in snRNA pseudouridine synthesis, tRNA pseudouridine synthesis and localizes to nucleus	F355L	T1062C	orf19.3477-P	1	NOISE
Ca21chr6_C_albicans_SC5314	497855	G	A	53	65	30	60								UPSTREAM:orf19.3482-P	1	NOISE
Ca21chr6_C_albicans_SC5314	499853	C	T	93	52	17	40	orf19.3482		orf19.10986|IPF23790.1|IPF14979.2|Contig4-2065_0003|orf6.4977|CA2897|CaO19.10986|NPY1|CaO19.3482|IPF14979	ORF|Uncharacterized	S. cerevisiae ortholog NPY1 has NAD+ diphosphatase activity, has role in NADH metabolic process and localizes to peroxisome	I195I	C584T	orf19.3482-P	1	NOISE
Ca21chr6_C_albicans_SC5314	501605	T	C	69	75	9	38								UPSTREAM:orf19.3483-P	1	NOISE
Ca21chr6_C_albicans_SC5314	515555	C	T	81	69	7	33								UPSTREAM:orf19.5515-P	1	NOISE
Ca21chr6_C_albicans_SC5314	516025	G	A	94	68	24	56	orf19.5518		orf19.12964|IPF16093.2|IPF4317.1|Contig4-1777_0004|Contig4-2188_0004|orf6.4460|orf6.745|CA2521|CaO19.5518|IPF4317	ORF|Uncharacterized		G174D	G520A	orf19.5518-P	1	NOISE
Ca21chr6_C_albicans_SC5314	523072	A	G	82	91	31	69	orf19.5523		orf19.12969|IPF4325.2|IPF27987.1|Contig4-2118_0003|Contig4-2690_0008|orf6.4465|orf6.873|CA0212|CaO19.5523|IPF4325	ORF|Uncharacterized		I121V	A360G	orf19.5523-P	1	NOISE
Ca21chr6_C_albicans_SC5314	535502	A	G	85	72	32	74	orf19.5533		orf19.12979|IPF21578.1|IPF4343.2|orf6.1548|CA0552|CaO19.5533|VPS9|CaO19.12979|IPF4343	ORF|Uncharacterized	S. cerevisiae ortholog VPS9 has guanyl-nucleotide exchange factor activity, ubiquitin binding, has role in vacuole inheritance, protein targeting to vacuole and localizes to cytosol	K645R	A1933G	orf19.5533-P	1	NOISE
Ca21chr6_C_albicans_SC5314	546641	C	A	99	3	42	6								UPSTREAM:orf19.5536-P	1	NOISE
Ca21chr6_C_albicans_SC5314	550264	G	C	81	58	24	55								UPSTREAM:orf19.5537-P	1	NOISE
Ca21chr6_C_albicans_SC5314	555585	A	G	61	60	35	84	orf19.5541		orf19.12987|IPF9132.2|IPF27973.1|Contig4-2737_0003|orf6.2205|orf6.3625|YPL184|CA0969|CaO19.5541|IPF9132	ORF|Uncharacterized	Protein with similarity to S. pombe Nrd1p; transcription induced upon induction of hyphal growth; regulated by Cph1p, Efg1p, Cph2p; low-level expression; alkaline upregulated; fungal-specific (no human or murine homolog)	A152A	A455G	orf19.5541-P	1	NOISE
Ca21chr6_C_albicans_SC5314	564397	C	T	63	57	17	39								UPSTREAM:orf19.5544-P	1	NOISE
Ca21chr6_C_albicans_SC5314	570155	C	A	75	77	31	67								UPSTREAM:orf19.5550-P	1	NOISE
Ca21chr6_C_albicans_SC5314	576376	C	T	78	79	19	52								UPSTREAM:orf19.5553-P	1	NOISE
Ca21chr6_C_albicans_SC5314	582068	T	C	66	73	23	67								UPSTREAM:orf19.5556-P	1	NOISE
Ca21chr6_C_albicans_SC5314	592776	A	G	83	91	29	82	orf19.5561	RAV2	orf19.13007|IPF21644.1|IPF5385.2|Contig4-3002_0010|orf6.3250|CA1653|CaO19.5561|STE23|CaO19.13007	ORF|Verified	Protein similar to S. cerevisiae Rav2p, which is involved in acidification of the vacuole; transposon mutation affects filamentous growth	L766L	A2297G	orf19.5561-P	1	NOISE
Ca21chr6_C_albicans_SC5314	598526	G	A	77	75	29	74	orf19.5565		orf19.13011|IPF19317.2|IPF5389.2|Contig4-3002_0004|orf6.3246|orf6.377|CA1650|CaO19.5565|IPF5389	ORF|Uncharacterized	Putative 3-hydroxyisobutyrate dehydrogenase	W78*	G232A	orf19.5565-P	1	NOISE
Ca21chr6_C_albicans_SC5314	601522	T	C	85	61	25	66	orf19.5567	POP4	orf19.13013|IPF21607.1|IPF16662.2|Contig4-3002_0001|orf6.3244|CA1648|CaO19.5567|CaO19.13013|IPF16662	ORF|Uncharacterized	Protein similar to S. cerevisiae Pop4p, which is a subunit of both RNase MRP and nuclear RNase P; filament induced; regulated by Nrg1p, Tup1p; likely to be essential for growth, based on an insertional mutagenesis strategy	L14L	T41C	orf19.5567-P	1	NOISE
Ca21chr6_C_albicans_SC5314	604120	A	C	130	2	48	13	orf19.5569		orf19.13015|orf19.13017|IPF12473|IPF12478.1|IPF16667.3|Contig4-2518_0001|Contig4-2518_0002|orf6.1358|orf6.1360|orf6.3242|CA0439|orf19.5571|SCRC1|CA0440|IPF12473.2|IPF12478	ORF|Uncharacterized|Alternatively spliced	S. cerevisiae ortholog SRC1 has role in mitotic sister chromatid segregation, maintenance of rDNA and localizes to nuclear envelope	K156N	A467C	orf19.5569-P	1	NOISE
Ca21chr6_C_albicans_SC5314	606570	T	G	83	81	13	46								UPSTREAM:orf19.5568-P	1	NOISE
Ca21chr6_C_albicans_SC5314	610178	A	C	78	69	35	67								UPSTREAM:orf19.5573-P	1	NOISE
Ca21chr6_C_albicans_SC5314	619815	A	G	74	84	23	48								UPSTREAM:orf19.5580-P	1	NOISE
Ca21chr6_C_albicans_SC5314	620723	G	T	75	70	33	72	orf19.5579		orf19.13025|IPF21608.1|IPF17545.2|Contig4-2246_0001|Contig4-2246_0002|orf6.1646|CA0612|CaO19.5579|CaO19.13025|IPF17545	ORF|Uncharacterized	Hap43p-repressed gene	G119V	G355T	orf19.5579-P	1	NOISE
Ca21chr6_C_albicans_SC5314	635371	T	C	182	0	84	10	orf19.5585	SAP5	orf19.13032|IPF21596.1|IPF6816.1|Contig4-2830_0009|orf6.4427|CA2499|CaO19.5585|CaO19.13032	ORF|Verified	Secreted aspartyl proteinase; sap4 sap5 sap6 triple mutant is defective in utilization of protein as N source; assessment of virulence role complicated by URA3 effects; expressed during infection; mRNA is localized to hyphal tip via She3p	F12F	T35C	orf19.5585-P	1	NOISE
Ca21chr6_C_albicans_SC5314	665898	T	A	61	60	19	55								UPSTREAM:orf19.5602-P	1	NOISE
Ca21chr6_C_albicans_SC5314	670355	T	G	94	2	89	13	orf19.5605		orf19.13048|IPF21655.1|IPF12513.2|orf6.5067|CA2967|CaO19.5605|CaO19.13048|IPF12513	ORF|Uncharacterized		P695P	T2084G	orf19.5605-P	1	NOISE
Ca21chr6_C_albicans_SC5314	688400	G	A	84	81	23	53								UPSTREAM:orf19.5616-P	1	NOISE
Ca21chr6_C_albicans_SC5314	688814	T	C	75	86	40	79	orf19.5616		orf19.13061|IPF16804.1|IPF19168.1|Contig4-1981_0003|orf6.4775|orf6.724|CA0162|CaO19.5616|IPF19168	ORF|Uncharacterized		I132I	T395C	orf19.5616-P	1	NOISE
Ca21chr6_C_albicans_SC5314	689693	C	T	88	90	37	89	orf19.5617		orf19.13062|IPF16806.1|IPF19169.2|Contig4-1981_0001|orf6.4776|orf6.723|CA2753|CaO19.5617|IPF16806	ORF|Uncharacterized	S. cerevisiae ortholog CTI6 has role in positive regulation of transcription, regulation of DNA-dependent DNA replication initiation, histone deacetylation	S72F	C214T	orf19.5617-P	1	NOISE
Ca21chr6_C_albicans_SC5314	693353	G	A	86	71	18	40								UPSTREAM:orf19.5618-P	1	NOISE
Ca21chr6_C_albicans_SC5314	705000	A	G	58	43	16	40								UPSTREAM:orf19.5623-P	1	NOISE
Ca21chr6_C_albicans_SC5314	716499	T	A	77	56	17	39								UPSTREAM:orf19.5629-P	1	NOISE
Ca21chr6_C_albicans_SC5314	727931	G	A	93	75	16	55								UPSTREAM:orf19.5702-P	1	NOISE
Ca21chr6_C_albicans_SC5314	767583	A	T	71	51	6	32								UPSTREAM:orf19.5729-P	1	NOISE
Ca21chr6_C_albicans_SC5314	773130	T	C	84	85	22	68	orf19.5732	NOG2	orf19.13154|orf19.13155|IPF21470.1|IPF10785.2|Contig4-3044_0008|Contig4-3044_0009|orf6.4911|orf6.4912|CA2847|orf19.5733|CA2848|IPF10785.exon2|IPF10786.2|IPF10785.exon1	ORF|Uncharacterized	Putative nucleolar GTPase; Hap43p-induced gene; decreased expression in response to prostaglandins	A47A	T140C	orf19.5732-P	1	NOISE
Ca21chr6_C_albicans_SC5314	776536	C	T	78	62	45	94	orf19.5734	POP2	orf19.13156|IPF21459.1|IPF10787.2|Contig4-3044_0007|orf6.4913|CA2849|CaO19.13156|CaO19.5734	ORF|Verified	Component of the Ccr4-Pop2 mRNA deadenylase; heterozygous null mutant exhibits resistance to parnafungin and cordycepin in the C. albicans fitness test	T78T	C233T	orf19.5734-P	1	NOISE
Ca21chr6_C_albicans_SC5314	780661	G	A	67	240	30	87	orf19.5735.3;omega-6a		IPF19628.1|CA2851|Tca5c;omega	ORF|Dubious;long_terminal_repeat	Long terminal repeat (LTR) associated with the transposon Tca5; about 685 bp long, up to 5 copies per genome	T24T	G71A	orf19.5735.3-P	1	NOISE
Ca21chr6_C_albicans_SC5314	803697	A	G	84	54	23	53								UPSTREAM:orf19.5746-P	1	NOISE
Ca21chr6_C_albicans_SC5314	810331	A	G	57	58	19	42								UPSTREAM:orf19.5749-P	1	NOISE
Ca21chr6_C_albicans_SC5314	812789	C	T	80	3	78	9								UPSTREAM:orf19.5750-P	1	NOISE
Ca21chr6_C_albicans_SC5314	824897	A	G	45	42	11	32								UPSTREAM:orf19.5754-P	1	NOISE
Ca21chr6_C_albicans_SC5314	828213	G	A	95	80	14	40								UPSTREAM:orf19.5758-P	1	NOISE
Ca21chr6_C_albicans_SC5314	830601	A	C	119	0	75	10	orf19.5758	SAL6	orf19.13181|IPF15064.3|IPF13917.1|Contig4-2302_0009|orf6.1305|orf6.6200|CA3829|CaO19.5758|PPQ1|CaO19.13181	ORF|Uncharacterized	Putative protein phosphatase of the Type 1 family (serine/threonine-specific), similar to S. cerevisiae Ppq1p; mutant shows virulence defect	T104P	A309C	orf19.5758-P	1	NOISE
Ca21chr6_C_albicans_SC5314	834482	C	T	79	70	45	89	orf19.5759	SNQ2	orf19.13182|IPF21486.1|IPF13913.2|Contig4-3087_0024|orf6.6199|CA3828|CaO19.5759|CaO19.13182	ORF|Verified	Protein similar to S. cerevisiae Snq2p transporter; member of PDR subfamily of ABC family; transposon mutation affects filamentation; benomyl-induced transcription; detected at yeast-form cell plasma membrane by mass spec	N827N	C2480T	orf19.5759-P	1	NOISE
Ca21chr6_C_albicans_SC5314	843366	G	A	44	69	18	56								UPSTREAM:orf19.5762-P	1	NOISE
Ca21chr6_C_albicans_SC5314	886384	A	G	93	79	22	57								UPSTREAM:orf19.1214-P	1	NOISE
Ca21chr6_C_albicans_SC5314	911870	A	G	32	52	8	26								UPSTREAM:orf19.77.1-P	1	NOISE
Ca21chr6_C_albicans_SC5314	913585	A	G	69	42	12	33								UPSTREAM:orf19.4553-P	1	NOISE
Ca21chr6_C_albicans_SC5314	918606	T	G	94	62	15	42	orf19.74	SEC5	orf19.7725|orf19.7726|IPF17429.2|IPF19821.2|IPF27187.1|IPF16249.2|orf6.1371|orf6.80|orf6.1370|CA0445|CA0444|orf19.75|CaO19.74|CaO19.7725|IPF17429.5f	ORF|Uncharacterized	Predicted exocyst component; ortholog of S. cerevisiae Sec5p; merged with orf19.75 in Assembly 21	W297G	T888G	orf19.74-P	1	NOISE
Ca21chr6_C_albicans_SC5314	924447	C	T	55	44	17	40	orf19.1075		IPF18831.2|IPF19160.1|Contig4-1626_0009|orf6.735|CA0167|CaO19.1075|IPF19160	ORF|Uncharacterized		A184A	C551T	orf19.1075-P	1	NOISE
Ca21chr6_C_albicans_SC5314	927185	C	T	16	21	19	49	orf19.1075.1			pseudogene	Pseudogene; added to Assembly 21 based on comparative genome analysis	S51L	C151T	orf19.1075.1-P	1	NOISE
Ca21chr6_C_albicans_SC5314	929073	A	C	78	83	21	60	orf19.1077	ATM1	orf19.8678|orf19.8676|orf6.2145|orf6.736|IPF14199.2|IPF19157.2|Contig4-2068_0003|orf6.2147|CA0933|CaO19.1077	ORF|Uncharacterized	Member of MDR subfamily of ABC family; similar to S. cerevisiae ABC transporter, Atm1p; transcriptionally regulated by iron; expression greater in low iron; induced by nitric oxide independent of Yhb1p	K483N	A1448C	orf19.1077-P	1	NOISE
Ca21chr6_C_albicans_SC5314	939597	A	G	66	90	30	62								UPSTREAM:orf19.1084-P	1	NOISE
Ca21chr6_C_albicans_SC5314	957599	A	G	79	57	37	71								UPSTREAM:orf19.1092-P	1	NOISE
Ca21chr6_C_albicans_SC5314	961109	A	G	68	58	58	104	orf19.1093	FLO8	orf19.8695|IPF26221.1|IPF10214.2|orf6.3004|CA1476|CaO19.1093|IPF10214	ORF|Verified	Transcription factor; required for wild-type hyphal formation; regulates hyphal gene expression; required for virulence in mouse systemic infection; binds Efg1p; binds Mss11p via LisH motif; has LUFS domain; ortholog of S. cerevisiae Flo8p	K359K	A1076G	orf19.1093-P	1	NOISE
Ca21chr6_C_albicans_SC5314	984346	G	T	67	69	30	74								UPSTREAM:orf19.2125-P	1	NOISE
Ca21chr6_C_albicans_SC5314	993551	G	C	78	71	38	99	orf19.2131		orf19.9678|IPF25179.1|IPF12244.2|Contig4-2687_0002|orf6.5365|CA3180|CaO19.9678|CaO19.2131|IPF12244	ORF|Uncharacterized	S. cerevisiae ortholog TUL1 has ubiquitin-protein ligase activity, has role in protein ubiquitination, ubiquitin-dependent protein catabolic process via the multivesicular body sorting pathway and localizes to Golgi apparatus	A631P	G1890C	orf19.2131-P	1	NOISE
Ca21chr6_C_albicans_SC5314	1013416	T	G	81	1	55	13								UPSTREAM:orf19.2146-P	1	NOISE
Ca21chr6_C_albicans_SC5314	1015770	A	C	123	0	71	8								UPSTREAM:orf19.2149-P	1	NOISE
Ca21chr6_C_albicans_SC5314	1022081	T	G	88	4	68	8								UPSTREAM:orf19.2156-P	1	NOISE
Ca21chr6_C_albicans_SC5314	1028608	G	A	149	5	70	12	kappa-6a		kappa	long_terminal_repeat	Long terminal repeat (LTR) associated with the transposon Tca6; about 280 bp long, 10-15 copies per genome			UPSTREAM:orf19.2163-P	1	NOISE
Ca21chr6_C_albicans_SC5314	1030267	C	A	96	3	108	16	orf19.2163		orf19.9709|IPF25178.1|IPF2702.1|orf6.2476|CA1134|CaO19.2163|CaO19.9709|IPF2702	ORF|Uncharacterized	Ortholog of S. cerevisiae YBR074W	Q484K	C1449A	orf19.2163-P	1	NOISE
Ca21chr7_C_albicans_SC5314	62511	T	G	129	1	52	10	orf19.7081	SPL1	orf6.8472|NFS1|IPF518.1|Contig4-3106_0046|CA5617|CaJ7.0052|CaO19_7081|CaJ7_0052|CaO19.7081	ORF|Uncharacterized	Protein similar to S. cerevisiae Spl1p, which is involved in tRNA splicing; member of pyridoxal-phosphate-dependent aminotransferase protein family; predicted to be essential	L12V	T33G	orf19.7081-P	1	NOISE
Ca21chr7_C_albicans_SC5314	65734	A	G	106	0	75	10	orf19.7079		IPF514.1|Contig4-3106_0049|orf6.8474|CA5619|CaJ7.0054|BUD3|CaO19.7079|CaJ7_0054|CaO19_7079|IPF514	ORF|Uncharacterized		T1005A	A3012G	orf19.7079-P	1	NOISE
Ca21chr7_C_albicans_SC5314	118688	T	C	48	0	34	7								UPSTREAM:orf19.7051-P	1	NOISE
Ca21chr7_C_albicans_SC5314	148082	C	T	72	4	27	7								UPSTREAM:orf19.7041-P	1	NOISE
Ca21chr7_C_albicans_SC5314	149841	G	T	142	0	60	9	orf19.7041		IPF3079.2|Contig4-1858_0007|orf6.7967|CA5222|CaJ7.0091|CaO19.7041|PTA1|CaJ7_0091|CaO19_7041|IPF3079	ORF|Verified	Putative pre-tRNA processing protein; heterozygous null mutant exhibits hypersensitivity to parnafungin and cordycepin in the C. albicans fitness test	V551L	G1650T	orf19.7041-P	1	NOISE
Ca21chr7_C_albicans_SC5314	192793	C	G	133	0	50	8								UPSTREAM:orf19.7022-P	1	NOISE
Ca21chr7_C_albicans_SC5314	225606	T	G	113	0	90	13	orf19.7006		IPF11756.2|orf6.7932|CA5194|CaJ7.0126|CaO19_7006|CaJ7_0126|IPF11756	ORF|Uncharacterized		N325K	T974G	orf19.7006-P	1	NOISE
Ca21chr7_C_albicans_SC5314	382959	T	G	115	8	41	8	orf19.6544	LPI9	orf19.13897|IPF20671.1|IPF15433.2|Contig4-2763_0002|orf6.5271|CA3110|CaJ7.0205|CaJ7_0205|CaO19_6544|CaO19.6544|CaO19.13897	ORF|Uncharacterized	S. cerevisiae ortholog GIP3 has protein phosphatase type 1 regulator activity, protein phosphatase 1 binding and has role in regulation of phosphoprotein phosphatase activity, chromosome segregation	C906G	T2715G	orf19.6544-P	1	NOISE
Ca21chr7_C_albicans_SC5314	400037	C	T	162	1	70	23	orf19.6534.2		orf19.13888|IPF20667.1|IPF5159.1|Contig4-3024_0017|Contig4-3024_0018|Contig4-3024_0019|orf6.7625|CA4942|CA4940|CaJ7.0212|orf19.6535|CRN1.5f	ORF|Uncharacterized	S. cerevisiae ortholog CRN1 has role in actin filament organization, microtubule-based process, negative regulation of Arp2/3 complex-mediated actin nucleation, actin cortical patch localization	N518N	C1553T	orf19.6534.2-P	1	NOISE
Ca21chr7_C_albicans_SC5314	405833	A	C	149	3	53	8	orf19.6531.1	TOM71	IPF20562.1|IPF5151.1|Contig4-3024_0026|CA4946|CaJ7.s008|CaJ7_s008	ORF|Uncharacterized	Putative componenet of the TOM (translocase of outer membrane) complex; flucytosine induced	G3G	A8C	orf19.6531.1-P	1	NOISE
Ca21chr7_C_albicans_SC5314	406448	G	C	106	0	39	6								UPSTREAM:orf19.6531-P	1	NOISE
Ca21chr7_C_albicans_SC5314	418687	C	A	146	0	82	9	orf19.6526		orf19.13879|IPF20625.1|IPF13609.2|Contig4-2478_0002|Contig4-3089_0053|orf6.7634|CA4952|CaJ7.0222|CaO19.6526|RBD2|CaO19.13879|CaJ7_0222|CaO19_6526|IPF13609	ORF|Uncharacterized	S. cerevisiae ortholog RBD2 localizes to COPI-coated vesicle, Golgi apparatus	T82N	C244A	orf19.6526-P	1	NOISE
Ca21chr7_C_albicans_SC5314	431958	A	T	80	54	25	59								UPSTREAM:orf19.6522-P	1	NOISE
Ca21chr7_C_albicans_SC5314	457376	T	G	153	4	79	9								UPSTREAM:orf19.6512-P	1	NOISE
Ca21chr7_C_albicans_SC5314	458339	A	G	73	74	20	47	orf19.6511	LIG1	orf19.13864|IPF20541.1|IPF3918.2|Contig4-3089_0004|Contig4-3089_0005|orf6.7649|CA4962|TRL1|CaJ7.0238|CaO19_6511|CaJ7_0238|CaO19.13864|CaO19.6511	ORF|Verified	tRNA ligase; functional homolog of S. cerevisiae Trl1p; fungal-specific (no human or murine homolog)	Q38Q	A113G	orf19.6511-P	1	NOISE
Ca21chr7_C_albicans_SC5314	476354	T	G	182	0	69	10	orf19.6498		orf19.13851|IPF20606.1|IPF8439.1|Contig4-2822_0006|orf6.3363|CA1730|CaJ7.0252|CaO19.6498|CaJ7_0252|CaO19_6498|CaO19.13851|IPF8439	ORF|Uncharacterized	S. cerevisiae ortholog IWR1 has role in general transcription from RNA polymerase II promoter, gene-specific transcription from RNA polymerase II promoter, chromatin remodeling	I193S	T577G	orf19.6498-P	1	NOISE
Ca21chr7_C_albicans_SC5314	481065	A	T	46	48	41	80	orf19.6494	WHI3	orf19.13847|IPF20559.1|IPF8447.2|Contig4-2822_0002|orf6.3359|CA1728|CaJ7.0255|CaO19_6494|CaJ7_0255|CaO19.13847|WHI4|CaO19.6494	ORF|Uncharacterized	Putative RNA binding protein; induced during infection of murine kidney, compared to growth in vitro; has murine homolog	Q231H	A692T	orf19.6494-P	1	NOISE
Ca21chr7_C_albicans_SC5314	486864	A	G	70	73	18	54	orf19.6491		orf19.13844|IPF20673.1|IPF27698.1|Contig4-1746_0005|orf6.1076|CaJ7.0259|CaO19.13844|CaO19.6491|CaO19_6491|CaJ7_0259	ORF|Dubious		K116E	A345G	orf19.6491-P	1	NOISE
Ca21chr7_C_albicans_SC5314	486890	C	T	74	70	20	52								UPSTREAM:orf19.6489-P	1	NOISE
Ca21chr7_C_albicans_SC5314	489152	A	C	160	1	72	8								UPSTREAM:orf19.6488-P	1	NOISE
Ca21chr7_C_albicans_SC5314	510590	T	C	81	78	14	43	orf19.6477		orf19.13831|IPF20597.1|IPF6605.2|Contig4-2536_0006|orf6.3717|CA1998|CaJ7.0274|CaO19.13831|CaO19.6477|CaO19_6477|CaJ7_0274|IPF6605	ORF|Uncharacterized	S. cerevisiae ortholog TRM82 has tRNA (guanine-N7-)-methyltransferase activity, has role in tRNA methylation and localizes to nucleus	S345P	T1032C	orf19.6477-P	1	NOISE
Ca21chr7_C_albicans_SC5314	518186	C	T	41	43	24	51								UPSTREAM:orf19.6470-P	1	NOISE
Ca21chr7_C_albicans_SC5314	519167	T	C	78	69	26	68	orf19.6472	CYP1	orf19.13826|IPF20652.1|IPF17713.2|Contig4-1392_0002|Contig4-2430_0002|orf6.2216|CA0972|CaJ7.0279|CPR1|CaO19.13826|CaO19.6472|CaJ7_0279|CaO19_6472	ORF|Verified	Peptidyl-prolyl cis-trans isomerase; cyclosporin A sensitive activity; soluble in hyphae; biofilm induced, macrophage-induced protein; downregulated upon treatment of biofilm with farnesol; present in exponential and stationary phase cells	N153N	T458C	orf19.6472-P	1	NOISE
Ca21chr7_C_albicans_SC5314	521074	A	T	67	50	18	50	orf19.6470	AHP2	orf19.13824|IPF20642.1|IPF11428.2|Contig4-2613_0012|orf6.2214|CA0971|CaJ7.0281|AHP13|CaO19.6470|CaO19_6470|CaJ7_0281|CaO19.13824|IPF11428	ORF|Uncharacterized	Putative thiol-specific peroxiredoxin; macrophage-downregulated gene	V173V	A518T	orf19.6470-P	1	NOISE
Ca21chr7_C_albicans_SC5314	548123	C	T	77	67	37	70	orf19.6455		orf19.13813|IPF20636.1|IPF13667.2|Contig4-2374_0007|orf6.6004|CA3673|CaJ7.0296|CaO19.6455|CaO19_6455|CaJ7_0296|CaO19.13813|IPF13667	ORF|Uncharacterized	Putative protein of unknown function, transcription is upregulated in clinical isolates from HIV+ patients with oral candidiasis	F72F	C215T	orf19.6455-P	1	NOISE
Ca21chr7_C_albicans_SC5314	548421	A	G	80	51	24	51								UPSTREAM:orf19.6455-P	1	NOISE
Ca21chr7_C_albicans_SC5314	553138	A	G	116	1	46	7								UPSTREAM:orf19.6452-P	1	NOISE
Ca21chr7_C_albicans_SC5314	571919	C	T	36	40	12	37	orf19.3695		orf19.11179|IPF23573.1|IPF8065.2|Contig4-1953_0003|Contig4-1953_0004|orf6.2143|orf6.2882|CA0932|CaJ7.0310|CaO19.3695|EPT1|CaO19_3695|CaJ7_0310	ORF|Uncharacterized	S. cerevisiae ortholog EPT1 has diacylglycerol cholinephosphotransferase activity, ethanolaminephosphotransferase activity and has role in phosphatidylcholine biosynthetic process, phosphatidylethanolamine biosynthetic process	N400N	C1199T	orf19.3695-P	1	NOISE
Ca21chr7_C_albicans_SC5314	592325	A	G	90	86	15	63								UPSTREAM:orf19.5188-P	1	NOISE
Ca21chr7_C_albicans_SC5314	596776	A	G	64	73	31	67	orf19.5184		orf19.12651|orf19.12652|IPF22062.1|IPF22072.1|IPF17178.1|IPF17177.2|Contig4-2406_0001|Contig4-2406_0002|orf6.3495|orf6.3496|CA1829|CA1830|CaJ7.0317|orf19.5185|CaO19_5184|CaJ7_0317|IPF17177.3f	ORF|Uncharacterized	S. cerevisiae ortholog SRM1 has signal transducer activity, has role in rRNA export from nucleus, ribosomal subunit export from nucleus and localizes to nuclear chromatin	L106L	A317G	orf19.5184-P	1	NOISE
Ca21chr7_C_albicans_SC5314	604586	G	A	92	68	38	83	orf19.5181	NIK1	orf19.12648|COS1|COS-1|IPF22104.1|IPF19235.2|orf6.547|orf6.6955|CA0108|CaJ7.0320|HIK1|CA4415|HIK1.3eoc|IPF11890.1|HIK1.5eoc|IPF19235.1	ORF|Verified	Histidine kinase involved in a two-component signaling pathway that regulates cell wall biosynthesis; required for wild-type virulence in mouse systemic infection but not for wild-type growth or drug sensitivity/resistance	R1013R	G3038A	orf19.5181-P	1	NOISE
Ca21chr7_C_albicans_SC5314	625730	G	A	76	79	28	99	orf19.5171	PMT1	orf19.12638|IPF22034.1|IPF5408.1|Contig4-3092_0043|orf6.6965|CA4424|CaJ7.0330|CaO19.12638|CaO19.5171|CaO19_5171|CaJ7_0330	ORF|Verified	Protein mannosyltransferase (PMT), required for virulence in mouse systemic infection and for adhesion to epithelial cells; role in hyphal growth and drug sensitivity; Als1p, Sec20p, Kre9p, Pir1p are substrates; one of 5 PMT family members	K530K	G1589A	orf19.5171-P	1	NOISE
Ca21chr7_C_albicans_SC5314	630572	C	T	99	70	36	80	orf19.5170.1;orf19.5170	ENA21	orf19.12637|IPF22107.1|IPF5411.2|ENA21.3|Contig4-3092_0037|orf6.6966|CA4425|CaJ7.0331|CaO19.5170|ENA2|CaO19.12637|CaJ7_0331|CaO19_5170|ENA21.3f	blocked_reading_frame;ORF|Uncharacterized	Region annotated in Assembly 21 as a blocked reading frame, based on comparative genome analysis; overlaps orf19.5170, which is an open reading frame;Predicted ORF similar to S. cerevisiae sodium transporters Ena1p and Ena5p; Gcn4p-regulated; flucytosine, amphotericin B, or ketoconazole-induced; osmotic stress-induced; overlaps orf19.5170.1, which is annotated as a blocked reading frame	I254I	C761T	orf19.5170-P	1	NOISE
Ca21chr7_C_albicans_SC5314	632879	G	A	62	70	14	34								UPSTREAM:orf19.5169-P	1	NOISE
Ca21chr7_C_albicans_SC5314	635565	A	G	62	62	37	70	orf19.5168		orf19.12635|IPF22056.1|IPF5584.1|Contig4-3092_0033|orf6.6968|CA4427|CaJ7.0333|CaO19.5168|CaO19_5168|CaJ7_0333|CaO19.12635|IPF5584	ORF|Uncharacterized	S. cerevisiae ortholog TSR4 has role in maturation of SSU-rRNA and localizes to cytoplasm	A341A	A1022G	orf19.5168-P	1	NOISE
Ca21chr7_C_albicans_SC5314	641514	C	G	75	80	34	74	orf19.5165		orf19.12632|IPF22060.1|IPF5577.2|Contig4-3092_0029|orf6.6971|CA4430|CaJ7.0337|CaO19.12632|CaO19_5165|CaJ7_0337|CaO19.5165|IPF5577	ORF|Uncharacterized	S. cerevisiae ortholog YNR029C localizes to cytoplasm	F307L	C920G	orf19.5165-P	1	NOISE
Ca21chr7_C_albicans_SC5314	652103	T	C	31	65	9	30								UPSTREAM:orf19.5160-P	1	NOISE
Ca21chr7_C_albicans_SC5314	656857	A	G	60	76	23	69	orf19.5159		orf19.12626|IPF22061.1|IPF13868.2|Contig4-3092_0015|orf6.6977|YNL191|CA4436|CaJ7.0343|CaO19.5159|CaO19.12626|IPF13868	ORF|Uncharacterized	S. cerevisiae ortholog DUG3 has omega peptidase activity, has role in glutathione catabolic process and localizes to cytoplasm	T196T	A587G	orf19.5159-P	1	NOISE
Ca21chr7_C_albicans_SC5314	660601	G	A	83	78	37	81	orf19.5155	CHS6	orf19.12622|IPF22047.1|IPF13864.2|Contig4-3092_0010|orf6.5943|orf6.6981|CA4440|CaJ7.0348|CaO19.5155|CaJ7_0348|CaO19_5155|IPF13864|IPF13864.1	ORF|Uncharacterized	Protein with tetratricopeptide repeats (TPRs); similar to S. cerevisiae Chs6p, which has role in localizing chitin synthase; decreased mRNA abundance in cyr1 mutant hyphae; possibly an essential gene, disruptants not obtained by UAU1 method	D609N	G1824A	orf19.5155-P	1	NOISE
Ca21chr7_C_albicans_SC5314	673851	T	A	76	49	12	33								UPSTREAM:orf19.5145-P	1	NOISE
Ca21chr7_C_albicans_SC5314	678012	A	G	66	73	23	52	orf19.5143		orf19.12608|IPF8130.2|IPF19344.2|orf6.312|orf6.5955|CA3631|CaJ7.0359|CaJ7_0359|CaO19_5143|CaO19.5143|TIM54	ORF|Uncharacterized	S. cerevisiae ortholog TIM54 has protein channel activity, has role in protein import into mitochondrial inner membrane and localizes to mitochondrial inner membrane protein insertion complex	S394S	A1181G	orf19.5143-P	1	NOISE
Ca21chr7_C_albicans_SC5314	678093	C	A	81	71	21	49								UPSTREAM:orf19.5141-P	1	NOISE
Ca21chr7_C_albicans_SC5314	678120	T	C	79	74	22	49	orf19.5142	DFR1	orf19.12607|IPF22076.1|IPF8131.1|Contig4-2489_0001|orf6.5956|CA3632|DHFR|CaJ7.0360|CaO19.5142|CaO19.12607|CaJ7_0360|CaO19_5142	ORF|Verified	Trimethoprim resistant dihydrofolate reductase (DHFR), reduces 7,8-dihydrofolate to 5,4,7,8-tetrahydrofolate; binds NADPH; target of drugs that selectively inhibit the fungal enzyme rather than the human enzyme	T187T	T560C	orf19.5142-P	1	NOISE
Ca21chr7_C_albicans_SC5314	683043	G	C	64	67	21	46	orf19.5140		orf19.12605|IPF22042.1|IPF8138.2|Contig4-2489_0004|orf6.5958|CA3634|CaJ7.0362|LPF34|CaO19.5140|CaJ7_0362|CaO19_5140|CaO19.12605|IFA25	ORF|Uncharacterized		V237S	G708C	orf19.5140-P	1	NOISE
Ca21chr7_C_albicans_SC5314	689971	T	C	78	67	36	80	orf19.5138	IFA21	orf19.12603|IPF16529.2|IPF28124.1|Contig4-2447_0019|orf6.5960|CA3636|CaJ7.0365|CaJ7_0365|CaO19_5138|CaO19.5138|LPF32	ORF|Uncharacterized	Protein not essential for viability	V672A	T2014C	orf19.5138-P	1	NOISE
Ca21chr7_C_albicans_SC5314	693252	G	A	81	59	15	53								UPSTREAM:orf19.5137-P	1	NOISE
Ca21chr7_C_albicans_SC5314	694135	A	G	56	65	32	80	orf19.5136		orf19.12601|IPF22064.1|IPF9255.2|Contig4-2447_0008|orf6.5962|CA3637|CaJ7.0368|CaO19_5136|CaJ7_0368|CaO19.12601|CaO19.5136|IPF9255	ORF|Uncharacterized	Putative pyridoxamine 5'-phosphate oxidase; early-stage biofilm- and planktonic growth-induced gene	Q8R	A22G	orf19.5136-P	1	NOISE
Ca21chr7_C_albicans_SC5314	694160	C	T	64	66	41	83								UPSTREAM:orf19.5136-P	1	NOISE
Ca21chr7_C_albicans_SC5314	701026	G	C	76	74	28	62								UPSTREAM:orf19.5132-P	1	NOISE
Ca21chr7_C_albicans_SC5314	710583	A	T	110	3	30	7								UPSTREAM:orf19.5126-P	1	NOISE
Ca21chr7_C_albicans_SC5314	711500	T	C	79	84	27	55	orf19.5126		orf19.12591|orf19.12593|IPF22069.1|IPF14561.3|IPF14556.2|IPF14559.1|Contig4-1627_0002|Contig4-1627_0005|orf6.37|orf6.3405|orf6.3403|CA1758|CA1757|CaJ7.0377|CaJ7.0378|orf19.5128|IPF14559.3f	ORF|Uncharacterized	Putative adhesin-like protein	F261S	T781C	orf19.5126-P	1	NOISE
Ca21chr7_C_albicans_SC5314	727951	G	A	67	66	32	63	orf19.1345	LIP8	orf19.8925|orf6.2643|IPF7914.2|IPF29487.1|Contig4-3068_0044|CA1241|CaJ7.0382|CaO19_1345|CaJ7_0382|CaO19.1345	ORF|Verified	Secreted lipase, member of a differentially expressed lipase gene family with possible roles in nutrition and/or in creating an acidic microenvironment; LIP5 and LIP8 are expressed at all stages of both mucosal and systemic infection	A312T	G933A	orf19.1345-P	1	NOISE
Ca21chr7_C_albicans_SC5314	734335	A	G	89	68	20	45	orf19.1343		orf19.8923|IPF7922.2|IPF17576.2|Contig4-3068_0036|orf6.1345|orf6.2645|CA1243|CaJ7.0384|CaJ7_0384|CaO19_1343|SIN4|CaO19.1343|IPF7922	ORF|Uncharacterized	Putative RNA polymerase II mediator complex subunit; induced by nitric oxide	*495*	A1483G	orf19.1343-P	1	NOISE
Ca21chr7_C_albicans_SC5314	736004	T	C	58	58	12	43								UPSTREAM:orf19.1343-P	1	NOISE
Ca21chr7_C_albicans_SC5314	736859	A	G	70	74	27	72	orf19.1342	SHM1	orf19.8922|orf6.1344|IPF19725.2|IPF7924.2|Contig4-3068_0034|orf6.2646|CA0433|CaJ7.0385|CaJ7_0385|CaO19_1342|CaO19.1342	ORF|Uncharacterized	Mitochondrial serine hydroxymethyltransferase; complements the glycine auxotrophy of an S. cerevisiae shm1 null shm2 null gly1-1 triple mutant; protein present in exponential and stationary growth phase yeast cultures	*237*	A710G	orf19.1342-P	1	NOISE
Ca21chr7_C_albicans_SC5314	737781	A	C	65	71	21	52								UPSTREAM:orf19.1342-P	1	NOISE
Ca21chr7_C_albicans_SC5314	739461	G	T	81	76	11	64	orf19.1340		orf19.8920|IPF18538.2|IPF7927.1|Contig4-3068_0030|orf6.1342|CA0431|CaJ7.0387|CaO19_1340|CaJ7_0387|CaO19.1340|IPF7927	ORF|Uncharacterized	Putative aldose reductase; protein level decreases in stationary phase cultures	T137T	G410T	orf19.1340-P	1	NOISE
Ca21chr7_C_albicans_SC5314	740164	T	C	76	73	20	55								UPSTREAM:orf19.1340-P	1	NOISE
Ca21chr7_C_albicans_SC5314	742373	C	T	65	69	14	50								UPSTREAM:orf19.1336.2-P	1	NOISE
Ca21chr7_C_albicans_SC5314	771305	G	A	75	71	28	71	orf19.6705		orf19.13997|IPF20496.1|IPF6654.2|Contig4-2413_0004|orf6.6814|YBL60|CA4305|CaJ7.0399|CaO19.13997|CaO19_6705|CaJ7_0399|CaO19.6705|IPF6654	ORF|Verified	Putative guanyl nucleotide exchange factor with Sec7 domain, required for normal filamentous growth; transcriptionally regulated upon yeast-hyphal switch; filament induced; regulated by Nrg1p, Tup1p, Mob2p, Hap43p; mRNA binds to She3p	D87N	G258A	orf19.6705-P	1	NOISE
Ca21chr7_C_albicans_SC5314	776413	T	G	72	70	29	65	orf19.6706	GYP7	orf19.13998|IPF20471.1|IPF6656.2|Contig4-2413_0003|orf6.6815|CA4306|CaJ7.0400|CaO19.6706|CaO19_6706|CaJ7_0400|CaO19.13998	ORF|Uncharacterized	Protein similar to S. cerevisiae Gyp7p (GTPase-activating protein for Ypt1p); caspofungin-induced	V491G	T1471G	orf19.6706-P	1	NOISE
Ca21chr7_C_albicans_SC5314	779672	A	C	149	0	79	13								UPSTREAM:orf19.6684-P	1	NOISE
Ca21chr7_C_albicans_SC5314	803075	A	C	54	0	25	6	orf19.6693		orf19.13985|IPF20494.1|IPF2605.1|Contig4-3088_0028|orf6.6802|CA4296|CaJ7.0411|CaO19.13985|CaJ7_0411|CaO19_6693|CaO19.6693|IPF2605	ORF|Uncharacterized	S. cerevisiae ortholog YOL098C localizes to cytoplasm	I1103L	A3306C	orf19.6693-P	1	NOISE
Ca21chr7_C_albicans_SC5314	898484	A	C	131	0	94	11	orf19.7158		IPF1954.1|Contig4-3083_0001|orf6.8058|CA5295|CaJ7.0481|CaO19_7158|CaJ7_0481|CaO19.7158|IPF1954	ORF|Uncharacterized	Protein of allantoate permease family; fungal-specific (no human or murine homolog); Hap43p-repressed gene	G436G	A1307C	orf19.7158-P	1	NOISE
Ca21chr7_C_albicans_SC5314	919240	T	C	128	0	96	13	orf19.7150	NRG1	IPF1932.1|Contig4-3083_0019|orf6.8050|CA5289|CaJ7.0489|CaO19_7150|CaJ7_0489|CaO19.7150	ORF|Verified	Transcriptional repressor; regulates chlamydospore development, hyphal gene induction, virulence genes, and genes involved in rescue/stress responses; effects both Tup1p-dependent (major) and -independent (minor) regulation; biofilm-induced	P131P	T392C	orf19.7150-P	1	NOISE
Ca21chr7_C_albicans_SC5314	928536	T	G	125	0	50	7								UPSTREAM:orf19.7148-P	1	NOISE
Ca21chr7_C_albicans_SC5314	933778	A	C	109	2	46	13	orf19.7140		IPF1912.1|Contig4-2757_0011|orf6.8040|CA5283|CaJ7.0501|CaO19_7140|CaJ7_0501|CMT1|CaO19.7140|IPF1912	ORF|Uncharacterized	Putative catechol o-methyltransferase; stationary phase enriched protein; transcription upregulated in clinical isolates from HIV+ patients with oral candidiasis	R217R	A648C	orf19.7140-P	1	NOISE
Ca21chrR_C_albicans_SC5314	25526	A	C	113	3	76	10	orf19.7529	EPL1	IPF355.1|Contig4-3048_0022|orf6.8781|CA5867|CaO19.7529	ORF|Verified	Subunit of the NuA4 histone acetyltransferase complex	D672A	A2014C	orf19.7529-P	1	NOISE
Ca21chrR_C_albicans_SC5314	36736	T	G	69	1	35	7								UPSTREAM:orf19.7521-P	1	NOISE
Ca21chrR_C_albicans_SC5314	49099	A	C	78	0	41	7								UPSTREAM:orf19.7514-P	1	NOISE
Ca21chrR_C_albicans_SC5314	68283	T	C	135	2	64	10	orf19.7506		IPF404.1|Contig4-3107_0051|orf6.8758|CA5849|CaO19.7506|IPF404.5f	ORF|Uncharacterized		I245T	T733C	orf19.7506-P	1	NOISE
Ca21chrR_C_albicans_SC5314	81707	C	G	138	0	78	9								UPSTREAM:orf19.7502-P	1	NOISE
Ca21chrR_C_albicans_SC5314	134137	A	C	156	0	68	10	orf19.7478		IPF2493.1|Contig4-2988_0006|orf6.8730|CA5823|COQ1|CaO19.7478	ORF|Uncharacterized	S. cerevisiae ortholog COQ1 has trans-hexaprenyltranstransferase activity, has role in ubiquinone biosynthetic process and localizes to mitochondrion	T31P	A90C	orf19.7478-P	1	NOISE
Ca21chrR_C_albicans_SC5314	137875	C	T	63	66	4	36	orf19.7475	PHO81	IPF2499.1|Contig4-2988_0003|orf6.8727|CA5821|CaO19.7475	ORF|Verified	Protein involved in regulation of hyphal development; required for response to farnesoic acid; possibly adherence-induced	T162I	C484T	orf19.7475-P	1	NOISE
Ca21chrR_C_albicans_SC5314	144550	T	G	119	1	45	6								UPSTREAM:orf19.7472-P	1	NOISE
Ca21chrR_C_albicans_SC5314	178436	A	C	138	2	68	11	orf19.3279;orf19.3280	HYR4	orf19.10789|IFF7|IPF24076.1|IPF296.1|Contig4-2791_0017|orf6.8279|CA5468|HYR8|CaO19.10789|CaO19.3279;IPF24069.1|IPF28834.1|orf6.8280	ORF|Uncharacterized;ORF|Dubious	Putative GPI-anchored adhesin-like protein; transcription is negatively regulated by Rim101p; constitutive expression independent of MTL or white-opaque status	T94P;G1014G	A279C;A3041C	orf19.3280-P;orf19.3279-P	1	NOISE
Ca21chrR_C_albicans_SC5314	197723	A	C	131	2	53	7								UPSTREAM:orf19.3269-P	1	NOISE
Ca21chrR_C_albicans_SC5314	215626	C	T	152	3	26	7	Tca9-R;psi-Ra		TCA9;psi	retrotransposon;long_terminal_repeat	Retrotransposon Tca9 on Chromosome R, about 5.1 kbp member of the gypsy group, flanked by 470-bp LTRs (psi elements);Long terminal repeat (LTR) associated with the transposon Tca9; about 470 bp long, 30 copies per genome			UPSTREAM:orf19.3261-P	1	NOISE
Ca21chrR_C_albicans_SC5314	268819	T	G	171	1	59	7								UPSTREAM:orf19.3238-P	1	NOISE
Ca21chrR_C_albicans_SC5314	279034	T	G	115	4	66	19	orf19.3233	HSE1	orf19.10743|IPF24033.1|IPF195.1|Contig4-2645_0003|orf6.8233|CA5431|CaO19.10743|CaO19.3233|IPF195	ORF|Uncharacterized	Putative SH3-domain-containing protein	P462P	T1385G	orf19.3233-P	1	NOISE
Ca21chrR_C_albicans_SC5314	318247	A	T	54	56	7	24								UPSTREAM:orf19.3221-P	1	NOISE
Ca21chrR_C_albicans_SC5314	324876	A	T	71	77	17	84	orf19.2518		orf19.10054|IPF24764.1|IPF4971.1|Contig4-2537_0005|orf6.1399|CA0460|CaO19.2518|SEC17|CaO19.10054	ORF|Uncharacterized	S. cerevisiae ortholog SEC17 has soluble NSF attachment protein activity, ATPase activator activity and has role in vesicle fusion with Golgi apparatus, vacuole fusion, non-autophagic, SNARE complex disassembly, autophagy	A169A	A506T	orf19.2518-P	1	NOISE
Ca21chrR_C_albicans_SC5314	326574	G	A	73	88	16	43	orf19.2520		orf19.10056|IPF18612.2|IPF4973.1|Contig4-2537_0001|orf6.1401|orf6.3376|CA0462|CaO19.2520|MRPS28	ORF|Uncharacterized	S. cerevisiae ortholog MRPS28 has structural constituent of ribosome and localizes to mitochondrial small ribosomal subunit	P242P	G725A	orf19.2520-P	1	NOISE
Ca21chrR_C_albicans_SC5314	340731	T	C	55	44	9	35	orf19.2530		orf19.10065|orf6.2389|CaO19.10065|CaO19.2530	ORF|Dubious		I45I	T134C	orf19.2530-P	1	NOISE
Ca21chrR_C_albicans_SC5314	368192	G	A	61	46	12	33								UPSTREAM:orf19.2549-P	1	NOISE
Ca21chrR_C_albicans_SC5314	375984	T	C	82	69	19	50								UPSTREAM:orf19.2553-P	1	NOISE
Ca21chrR_C_albicans_SC5314	380424	G	A	78	58	18	57	orf19.2558		orf19.10090|IPF24748.1|IPF7848.1|Contig4-3016_0024|orf6.3807|CA2058|CaO19.10090|CaO19.2558|IPF7848	ORF|Uncharacterized		D384N	G1149A	orf19.2558-P	1	NOISE
Ca21chrR_C_albicans_SC5314	381358	A	G	106	90	29	72	orf19.2559	CDC4	orf19.10091|IPF24734.1|IPF7849.2|Contig4-3016_0022|orf6.3808|CA2059|CaO19.10091|CaO19.2559	ORF|Verified	F-box subunit of SCF(CDC4) ubiquitin ligase; functional homolog of S. cerevisiae Cdc4p; mutation or depletion causes hyperfilamentation; nonessential; Sol1p is a substrate of SCF-Cdc4p	E594E	A1781G	orf19.2559-P	1	NOISE
Ca21chrR_C_albicans_SC5314	397154	A	C	79	63	6	37								UPSTREAM:orf19.2563-P	1	NOISE
Ca21chrR_C_albicans_SC5314	404508	T	G	48	59	17	64								UPSTREAM:orf19.2575-P	1	NOISE
Ca21chrR_C_albicans_SC5314	408033	G	T	70	67	12	33								UPSTREAM:orf19.2579-P	1	NOISE
Ca21chrR_C_albicans_SC5314	422973	T	C	66	49	17	62	orf19.2590		orf19.10121|IPF24778.1|IPF2776.2|Contig4-2970_0024|orf6.4108|CA2275|CaO19.10121|BIO4|CaO19.2590	ORF|Uncharacterized	Putative dethiobiotin synthetase; transcription is upregulated in clinical isolates from HIV+ patients with oral candidiasis; Hap43p-repressed gene	*50Q	T147C	orf19.2590-P	1	NOISE
Ca21chrR_C_albicans_SC5314	430548	C	T	107	7	44	13	orf19.2598	VMA4	orf19.10129|IPF24776.1|IPF2763.1|Contig4-2821_0009|orf6.4100|CA2270	ORF|Uncharacterized	H+ transporting ATPase E chain; transcription is regulated by Mig1p; caspofungin repressed; protein level decreases in stationary phase cultures	Q146*	C435T	orf19.2598-P	1	NOISE
Ca21chrR_C_albicans_SC5314	435220	C	A	86	68	31	81	orf19.2600	SPC98	orf19.10131|IPF24726.1|IPF24736.1|IPF18497.1|IPF2757.2|Contig4-2821_0016|orf6.4098|CA2267|IFU1.5f	ORF|Uncharacterized	Putative component of the microtubule-nucleating Tub4p (gamma-tubulin) complex; periodic mRNA expression, peak at cell-cycle S/G2 phase	L123I	C366A	orf19.2600-P	1	NOISE
Ca21chrR_C_albicans_SC5314	446299	A	G	67	67	19	63	orf19.2604		orf19.10135|IPF24750.1|IPF14135.2|Contig4-1720_0004|orf6.3595|CA1901|CaO19.10135|CaO19.2604|IPF14135	ORF|Uncharacterized	S. cerevisiae ortholog YNL022C localizes to nucleus	E137E	A410G	orf19.2604-P	1	NOISE
Ca21chrR_C_albicans_SC5314	454650	G	A	68	69	24	59	orf19.2608	ADH5	orf19.10139|IPF24761.1|IPF15671.2|Contig4-2025_0002|orf6.4277|CA2391|CaO19.10139|SAD1|CaO19.2608	ORF|Verified	Putative alcohol dehydrogenase; regulated by white-opaque switching; fluconazole-induced; antigenic in murine infection; regulated by Nrg1p, Tup1p; Hap43p-repressed, macrophage-downregulated protein; biofilm- and planktonic growth-induced	L128L	G383A	orf19.2608-P	1	NOISE
Ca21chrR_C_albicans_SC5314	459619	G	T	66	5	15	4								UPSTREAM:orf19.2611-P	1	NOISE
Ca21chrR_C_albicans_SC5314	463534	T	C	57	75	19	51								UPSTREAM:orf19.2613-P	1	NOISE
Ca21chrR_C_albicans_SC5314	464803	C	T	65	76	19	53								UPSTREAM:orf19.2614-P	1	NOISE
Ca21chrR_C_albicans_SC5314	466041	G	A	122	1	74	10	orf19.2614	RSR1	orf19.10145|IPF24771.1|IPF8507.2|Contig4-2859_0002|orf6.4271|CA2385|RSR1.3	ORF|Verified	RAS-related protein; GTP/GDP cycling required for wild-type polar bud site selection, hyphal growth guidance; role in systemic virulence in mouse; geranylgeranylation predicted; suppresses S. cerevisiae cdc24-4 mutant heat sensitivity	E169K	G504A	orf19.2614-P	1	NOISE
Ca21chrR_C_albicans_SC5314	466622	C	A	62	70	23	55								UPSTREAM:orf19.2615-P	1	NOISE
Ca21chrR_C_albicans_SC5314	519450	C	A	146	0	92	16	orf19.3735		orf19.11220|IPF4716.2|IPF19050.1|Contig4-3070_0017|orf6.1097|orf6.5465|CA3250|CaO19.3735|IPF4716	ORF|Uncharacterized	Predicted ORF in Assemblies 19, 20 and 21; transcription is induced in response to alpha pheromone in SpiderM medium	T375K	C1123A	orf19.3735-P	1	NOISE
Ca21chrR_C_albicans_SC5314	535295	T	A	74	72	17	45								UPSTREAM:orf19.3726-P	1	NOISE
Ca21chrR_C_albicans_SC5314	539626	C	T	66	76	10	31								UPSTREAM:orf19.3721-P	1	NOISE
Ca21chrR_C_albicans_SC5314	544070	G	A	61	65	7	28	iota-Ra		iota	long_terminal_repeat	Long terminal repeat (LTR); about 251 bp long, 13 copies per genome			UPSTREAM:orf19.3720-P	1	NOISE
Ca21chrR_C_albicans_SC5314	575629	G	T	82	66	12	56	orf19.164		orf19.7798|IPF14116.2|IPF10909.2|Contig4-2571_0002|orf6.1403|orf6.157|CA0464|CaO19.164|IPF14116	ORF|Uncharacterized	S. cerevisiae ortholog LPX1 has lipase activity and localizes to peroxisomal matrix	S101S	G302T	orf19.164-P	1	NOISE
Ca21chrR_C_albicans_SC5314	582032	G	A	70	76	8	31								UPSTREAM:orf19.2818-P	1	NOISE
Ca21chrR_C_albicans_SC5314	583196	T	G	71	65	22	55	orf19.2820		orf19.10338|IPF24485.1|IPF10900.2|Contig4-2405_0005|Contig4-2405_0006|orf6.1528|orf6.2208|CA0539|CaO19.2820|NUP57	ORF|Uncharacterized	S. cerevisiae ortholog NUP57 has role in mRNA export from nucleus, protein import into nucleus and localizes to Nic96 complex	T197T	T590G	orf19.2820-P	1	NOISE
Ca21chrR_C_albicans_SC5314	615157	C	T	82	75	11	39								UPSTREAM:orf19.2826-P	1	NOISE
Ca21chrR_C_albicans_SC5314	617143	T	C	61	65	12	40	orf19.2827		orf19.10345|IPF10963.2|IPF28963.1|Contig4-1774_0003|orf6.1901|CA0770|CaO19.10345|TID3|CaO19.2827|IPF10963	ORF|Uncharacterized		I419I	T1256C	orf19.2827-P	1	NOISE
Ca21chrR_C_albicans_SC5314	645399	T	G	72	75	25	64	orf19.2841	PGM2	orf19.10359|IPF15073.2|IPF28967.1|Contig4-2083_0003|orf6.1775|CA0692|CaO19.2841	ORF|Uncharacterized	Phosphoglucomutase; protein present in exponential and stationary growth phase yeast cultures; biofilm-induced gene	V324V	T971G	orf19.2841-P	1	NOISE
Ca21chrR_C_albicans_SC5314	680592	T	C	136	1	50	7								UPSTREAM:orf19.2851-P	1	NOISE
Ca21chrR_C_albicans_SC5314	695718	A	G	57	52	21	49								UPSTREAM:orf19.2425-P	1	NOISE
Ca21chrR_C_albicans_SC5314	709532	T	A	84	77	15	62								UPSTREAM:orf19.2412-P	1	NOISE
Ca21chrR_C_albicans_SC5314	723794	T	C	71	70	20	50	orf19.2401		orf19.9938|IPF14934.1|IPF29112.1|Contig4-1536_0003|Contig4-1537_0003|orf6.561|CA0113|CaO19.2401|ATG4|AUT2	ORF|Uncharacterized	Ortholog of S. cerevisiae ATG4	F48L	T141C	orf19.2401-P	1	NOISE
Ca21chrR_C_albicans_SC5314	751281	A	C	74	74	22	62	orf19.2384		orf19.9920|IPF24916.1|IPF9364.2|Contig4-2991_0013|orf6.3864|CA2101|CaO19.9920|CaO19.2384|IPF9364	ORF|Uncharacterized	S. cerevisiae ortholog MTG1 has role in mitochondrial translation and localizes to mitochondrial inner membrane	R325R	A972C	orf19.2384-P	1	NOISE
Ca21chrR_C_albicans_SC5314	781232	A	G	90	74	31	82	orf19.4394		orf19.11872|IPF22876.1|IPF3301.2|Contig4-3077_0008|orf6.6313|CA3908|CaO19.11872|CaO19.4394|IPF3301	ORF|Uncharacterized	Predicted ORF in Assemblies 19, 20 and 21; transcription is induced in response to alpha pheromone in SpiderM medium	L301L	A902G	orf19.4394-P	1	NOISE
Ca21chrR_C_albicans_SC5314	787579	T	C	82	73	11	37								UPSTREAM:orf19.4399-P	1	NOISE
Ca21chrR_C_albicans_SC5314	830510	T	G	72	63	10	37	orf19.4370		orf19.11848|IPF22892.1|IPF9450.2|Contig4-2376_0005|orf6.4535|CA2581|CaO19.4370|IPF9450	ORF|Uncharacterized	Predicted ORF in Assemblies 19, 20 and 21; induced by nitric oxide; oxidative stress-induced via Cap1p; fungal-specific (no human or murine homolog)	L7V	T18G	orf19.4370-P	1	NOISE
Ca21chrR_C_albicans_SC5314	830696	G	A	59	58	13	49								UPSTREAM:orf19.4370-P	1	NOISE
Ca21chrR_C_albicans_SC5314	831279	A	T	56	85	17	52								UPSTREAM:orf19.4371-P	1	NOISE
Ca21chrR_C_albicans_SC5314	832396	C	G	52	77	18	84	orf19.4371	TAL1	orf19.11849|IPF22891.1|IPF9448.2|Contig4-2376_0009|orf6.4536|CA2582|CaO19.11849|CaO19.4371	ORF|Verified	Putative transaldolase; protein present in exponential and stationary growth phase yeast cultures; biofilm induced; oxidative stress-induced via Cap1p; induced by nitric oxide independent of Yhb1p; sumoylation target	S179S	C536G	orf19.4371-P	1	NOISE
Ca21chrR_C_albicans_SC5314	853639	T	G	118	8	45	17								UPSTREAM:orf19.4353-P	1	NOISE
Ca21chrR_C_albicans_SC5314	885923	G	A	92	78	19	47								UPSTREAM:orf19.475-P	1	NOISE
Ca21chrR_C_albicans_SC5314	893227	C	A	80	51	26	90	orf19.474		orf19.8105|IPF11144.1|IPF29797.1|Contig4-2241_0003|orf6.2284|CA1017|CaO19.8105|CaO19.474|IPF11144	ORF|Uncharacterized	S. cerevisiae ortholog BRL1 has role in mRNA export from nucleus, protein export from nucleus, nuclear envelope organization and localizes to endoplasmic reticulum, nuclear envelope	H337Q	C1010A	orf19.474-P	1	NOISE
Ca21chrR_C_albicans_SC5314	898960	T	G	64	56	10	47								UPSTREAM:orf19.478-P	1	NOISE
Ca21chrR_C_albicans_SC5314	899187	T	C	75	60	14	39	orf19.479.2		IPF26812.1|IPF7098.2|Contig4-2441_0008|CA4525|SEC22	ORF|Uncharacterized	S. cerevisiae ortholog SEC22 has SNAP receptor activity and has role in retrograde vesicle-mediated transport, Golgi to ER, vesicle fusion with Golgi apparatus, ER to Golgi vesicle-mediated transport	N173N	T518C	orf19.479.2-P	1	NOISE
Ca21chrR_C_albicans_SC5314	900141	G	A	76	84	9	27								UPSTREAM:orf19.480-P	1	NOISE
Ca21chrR_C_albicans_SC5314	905943	G	T	147	1	56	7	orf19.485		orf19.8115|IPF26809.1|IPF7089.1|Contig4-2779_0007|orf6.7086|CA4520|CDC31	ORF|Uncharacterized	S. cerevisiae ortholog CDC31 has structural constituent of cytoskeleton and has role in spindle pole body duplication in nuclear envelope, microtubule nucleation, proteasomal ubiquitin-dependent protein catabolic process	E176*	G525T	orf19.485-P	1	NOISE
Ca21chrR_C_albicans_SC5314	910827	G	T	60	61	18	49								UPSTREAM:orf19.487-P	1	NOISE
Ca21chrR_C_albicans_SC5314	913333	T	C	67	85	24	62								UPSTREAM:orf19.488-P	1	NOISE
Ca21chrR_C_albicans_SC5314	913485	A	G	75	83	22	73	orf19.489	DAP1	orf19.8119|IPF26817.1|IPF18207.1|orf6.7082|CA4516|CaO19.8119|CaO19.489|IPF18207	ORF|Uncharacterized	Similar to mammalian membrane-associated progesterone receptors involved in DNA damage response; induced in core stress response; Hog1p regulated; clade-associated expression; Hap43p-repressed; planktonic growth-induced gene	G130G	A389G	orf19.489-P	1	NOISE
Ca21chrR_C_albicans_SC5314	913926	T	G	76	63	21	45								UPSTREAM:orf19.489-P	1	NOISE
Ca21chrR_C_albicans_SC5314	920059	A	G	79	76	12	51								UPSTREAM:orf19.492-P	1	NOISE
Ca21chrR_C_albicans_SC5314	934651	G	A	55	68	10	55	orf19.504		orf19.8134|IPF26762.1|IPF10388.2|Contig4-2663_0005|orf6.7067|CA4504|ARP5|CaO19.8134|CaO19.504	ORF|Uncharacterized	S. cerevisiae ortholog ARP5 has ATP-dependent 3'-5' DNA helicase activity, has role in nucleosome mobilization and localizes to Ino80 complex	*759*	G2276A	orf19.504-P	1	NOISE
Ca21chrR_C_albicans_SC5314	938887	A	T	76	66	21	55								UPSTREAM:orf19.506-P	1	NOISE
Ca21chrR_C_albicans_SC5314	940097	T	G	131	6	60	10	orf19.506	YDJ1	orf19.8136|IPF10391.1|IPF29798.1|Contig4-2663_0001|orf6.7065|CA4502|CaO19.506|IPF10391	ORF|Uncharacterized	Putative type I HSP40 co-chaperone; heavy metal (cadmium) stress-induced	G275G	T824G	orf19.506-P	1	NOISE
Ca21chrR_C_albicans_SC5314	952948	T	A	76	59	21	90	orf19.513		orf19.8144|IPF26785.1|IPF12481.2|Contig4-3063_0015|orf6.6725|CA4230|CaO19.513|NDT802|CaO19.8144|IPF12481	ORF|Uncharacterized	Protein with a DNA-binding domain, similar to S. cerevisiae meiosis-specific transcription factor Ndt80p	T302T	T905A	orf19.513-P	1	NOISE
Ca21chrR_C_albicans_SC5314	953753	A	G	80	79	18	53								UPSTREAM:orf19.514-P	1	NOISE
Ca21chrR_C_albicans_SC5314	954257	C	T	59	64	18	57								UPSTREAM:orf19.512-P	1	NOISE
Ca21chrR_C_albicans_SC5314	954338	T	C	96	73	21	73	orf19.515		orf19.8146|IPF26823.1|IPF12484.2|Contig4-3063_0017|orf6.6727|CA4232|CaO19.515|CaO19.8146|IPF12484	ORF|Uncharacterized		L141P	T421C	orf19.515-P	1	NOISE
Ca21chrR_C_albicans_SC5314	957567	A	G	75	64	10	70								UPSTREAM:orf19.517-P	1	NOISE
Ca21chrR_C_albicans_SC5314	960788	C	T	97	79	31	94	orf19.519		orf19.8150|IPF8168.2|IPF8166.2|Contig4-3063_0022|orf6.399|orf6.6731|CA4236|CaO19.519|CaO19.8150|IPF8166	ORF|Uncharacterized		P171P	C512T	orf19.519-P	1	NOISE
Ca21chrR_C_albicans_SC5314	969288	A	C	62	66	10	46								UPSTREAM:orf19.526-P	1	NOISE
Ca21chrR_C_albicans_SC5314	970000	T	C	90	80	8	56	orf19.527		orf19.8160|IPF26804.1|IPF8177.1|Contig4-3063_0032|orf6.6739|CA4241|CaO19.527|CaO19.8160|IPF8177	ORF|Uncharacterized	Late-stage biofilm-induced gene	Y187Y	T560C	orf19.527-P	1	NOISE
Ca21chrR_C_albicans_SC5314	976831	A	G	70	73	13	61								UPSTREAM:orf19.529.1-P	1	NOISE
Ca21chrR_C_albicans_SC5314	977467	C	T	88	92	32	62								UPSTREAM:orf19.530-P	1	NOISE
Ca21chrR_C_albicans_SC5314	978420	T	C	87	84	12	44	orf19.530		orf19.8163|IPF4305|IPF26784.1|IPF4305.2|Contig4-2736_0014|orf6.6742|CA4244|CaO19.530|CaO19.8163	ORF|Uncharacterized	Protein not essential for viability; Hap43p-induced gene	I295T	T883C	orf19.530-P	1	NOISE
Ca21chrR_C_albicans_SC5314	979714	T	A	73	57	13	45	orf19.532	RBR2	orf19.8165|orf6.6744|PGA21|IPF26816.1|IPF4303.2|Contig4-2736_0002|CA4245|CaO19.532|IPF4303	ORF|Uncharacterized	Cell wall protein; expression is repressed by Rim101p; expression is regulated upon white-opaque switching; transcription is repressed in response to alpha pheromone in SpiderM medium; macrophage-induced gene	D21E	T62A	orf19.532-P	1	NOISE
Ca21chrR_C_albicans_SC5314	987052	T	C	66	75	13	42	orf19.537		orf19.8170|IPF26803.1|IPF4294.2|Contig4-2736_0012|orf6.6749|CA4248|CaO19.8170|CaO19.537|IPF4294	ORF|Uncharacterized		N203N	T608C	orf19.537-P	1	NOISE
Ca21chrR_C_albicans_SC5314	989735	T	C	99	73	30	85	orf19.539	LAP3	orf19.8172|orf6.6751|IPF26781.1|IPF4292.2|CA4250|CaO19.8172|CaO19.539|IPF4292	ORF|Uncharacterized	Putative aminopeptidase; transcription positively regulated by Sfu1p; transcription repressed by alpha pheromone in SpiderM medium; clade-associated gene expression; virulence-group-correlated expression; Hap43p-induced; biofilm-induced	S232S	T695C	orf19.539-P	1	NOISE
Ca21chrR_C_albicans_SC5314	991043	A	G	64	78	15	49	orf19.540		orf19.8173|IPF26799.1|IPF4291.2|orf6.6752|CA4251|PPT2|CaO19.540|CaO19.8173|IPF4291	ORF|Uncharacterized		T240T	A719G	orf19.540-P	1	NOISE
Ca21chrR_C_albicans_SC5314	992598	T	C	57	47	17	57	orf19.541		orf19.8174|IPF26796.1|IPF4290.1|Contig4-1913_0001|orf6.6753|CA4252|CaO19.8174|CaO19.541|IPF4290	ORF|Uncharacterized		V211A	T631C	orf19.541-P	1	NOISE
Ca21chrR_C_albicans_SC5314	1001953	A	T	69	54	13	52								UPSTREAM:orf19.547-P	1	NOISE
Ca21chrR_C_albicans_SC5314	1004111	T	G	71	69	32	83	orf19.549		orf19.8184|IPF26811.1|IPF4276.2|Contig4-2070_0001|Contig4-2649_0003|orf6.6761|CA4260|MRPL32|CaO19.8184|CaO19.549|IPF4276	ORF|Uncharacterized	S. cerevisiae ortholog MRPL32 has structural constituent of ribosome and localizes to mitochondrial inner membrane, mitochondrial large ribosomal subunit	A16A	T47G	orf19.549-P	1	NOISE
Ca21chrR_C_albicans_SC5314	1005141	T	C	60	64	17	66	orf19.550	PDX3	orf19.8185|IPF15643.2|IPF4274.2|Contig4-2070_0006|Contig4-2649_0004|orf6.6762|CA4261|CaO19.550	ORF|Uncharacterized	Pyridoxamine-phosphate oxidase; transcription regulated by yeast-hyphal switch and by Nrg1p, Mig1p, Tup1p; caspofungin repressed; present in exponential and stationary phase yeast cultures; Hap43p-repressed; planktonic growth-induced	S171S	T512C	orf19.550-P	1	NOISE
Ca21chrR_C_albicans_SC5314	1013234	A	G	13	69	2	15								UPSTREAM:orf19.554-P	1	NOISE
Ca21chrR_C_albicans_SC5314	1026472	T	C	74	61	8	40								UPSTREAM:orf19.6318-P	1	NOISE
Ca21chrR_C_albicans_SC5314	1031815	C	T	112	8	31	7								UPSTREAM:orf19.6317-P	1	NOISE
Ca21chrR_C_albicans_SC5314	1035415	A	G	95	79	12	32	orf19.6315		orf19.13692|IPF20834.1|IPF6272.2|Contig4-3056_0010|orf6.5508|CA3282|CaO19.6315|CaO19.13692|IPF6272	ORF|Uncharacterized		L36S	A107G	orf19.6315-P	1	NOISE
Ca21chrR_C_albicans_SC5314	1035743	C	T	72	80	10	41								UPSTREAM:orf19.6315-P	1	NOISE
Ca21chrR_C_albicans_SC5314	1036430	A	G	97	76	23	68	orf19.6314	RPB8	orf19.13691|IPF20837.1|IPF6271.2|Contig4-3056_0012|orf6.5507|CA3281|CaO19.13691|CaO19.6314	ORF|Verified	Putative subunit of RNA polymerases I, II, and III; regulated by Gcn4p; repressed in response to amino acid starvation (3-aminotriazole treatment); heterozygous null mutant exhibits resistance to parnafungin	R122R	A365G	orf19.6314-P	1	NOISE
Ca21chrR_C_albicans_SC5314	1047136	G	A	53	51	6	23								UPSTREAM:orf19.6310-P	1	NOISE
Ca21chrR_C_albicans_SC5314	1054681	C	T	75	69	20	74	orf19.6306		orf19.13683|IPF20826.1|IPF12224.2|Contig4-3056_0038|orf6.5499|CA3272|CaO19.6306|ALD4|CaO19.13683	ORF|Verified	Trimethylaminobutyraldehyde dehydrogenase, the third enzyme of the carnitine biosynthesis pathway	H437Y	C1308T	orf19.6306-P	1	NOISE
Ca21chrR_C_albicans_SC5314	1058029	A	G	51	82	6	29	orf19.6305		orf19.13682|IPF20831.1|IPF12223.2|Contig4-3056_0040|orf6.5498|CA3271|CaO19.13682|GLY12|CaO19.6305|GLY2	ORF|Verified	Hydroxytrimethyllysine aldolase, the second enzyme in the carnitine biosynthesis pathway	V346V	A1037G	orf19.6305-P	1	NOISE
Ca21chrR_C_albicans_SC5314	1058106	G	A	46	78	11	30								UPSTREAM:orf19.6304-P	1	NOISE
Ca21chrR_C_albicans_SC5314	1060441	C	A	68	61	27	58	orf19.6302	PGA39	orf19.13679|IPF20832.1|IPF12221.2|Contig4-3056_0043|orf6.5495|CA3269|CaO19.6302|CaO19.13679|IPF12221	ORF|Uncharacterized	Putative GPI-anchored protein	L129I	C384A	orf19.6302-P	1	NOISE
Ca21chrR_C_albicans_SC5314	1063008	T	C	72	62	9	37	orf19.1803	CDC43	orf19.9369|IPF14866.2|IPF19031.1|Contig4-2476_0003|orf6.1162|orf6.1576|CA0571|CaO19.1803	ORF|Verified	Beta subunit of heterodimeric protein geranylgeranyltransferase type I; GGTase I enzyme binds zinc, is Mg-dependent; Cdc42p is GGTase I substrate	I6I	T17C	orf19.1803-P	1	NOISE
Ca21chrR_C_albicans_SC5314	1073856	A	G	75	5	15	6								UPSTREAM:orf19.652-P	1	NOISE
Ca21chrR_C_albicans_SC5314	1079912	G	C	18	42	1	14								UPSTREAM:orf19.635-P	1	NOISE
Ca21chrR_C_albicans_SC5314	1103026	A	G	68	52	25	73	orf19.644	HGT9	orf19.8258|orf19.8259|HXT4|IPF26668.1|IPF10171.1|Contig4-2707_0003|Contig4-2707_0004|Contig4-2707_0005|orf6.2714|orf6.2715|CA1281|orf19.645|orf19.644.1|IPF10171|CA1282|IPF10171.exon2|IPF10173.2|CA1283|IPF10171.exon1|IPF10171.exon3|IPF10174.2	ORF|Uncharacterized	Putative glucose transporter of the major facilitator superfamily; the C. albicans glucose transporter family comprises 20 members; 12 probable membrane-spanning segments; induced at low (0.2%, compared to 2%) glucose in rich media; intron	V125V	A374G	orf19.644-P	1	NOISE
Ca21chrR_C_albicans_SC5314	1109454	A	G	75	61	15	38	mu-Ra		mu	long_terminal_repeat	Long terminal repeat (LTR); about 780 bp long, 4 copies per genome			UPSTREAM:orf19.642-P	1	NOISE
Ca21chrR_C_albicans_SC5314	1113991	T	C	72	64	13	36	orf19.641		orf19.8255|IPF26669.1|IPF14630.2|Contig4-2852_0017|orf6.3528|CA1850|CaO19.8255|ERJ5|CaO19.641|IPF14630	ORF|Uncharacterized	S. cerevisiae ortholog ERJ5 has role in protein folding and localizes to endoplasmic reticulum	*89Q	T264C	orf19.641-P	1	NOISE
Ca21chrR_C_albicans_SC5314	1121879	C	T	50	47	11	30								UPSTREAM:orf19.555-P	1	NOISE
Ca21chrR_C_albicans_SC5314	1122444	C	T	77	0	27	8	orf19.555		orf19.8190|orf19.8250|orf6.362|IPF26750.1|IPF20036.1|IPF29759.1|IPF26680.1|IPF19931.2|Contig4-2448_0010|Contig4-2852_0008|orf6.3523|orf6.765|CA0177|orf19.635.1|orf19.636|CIS304|CaO19.8190|CaO19.555|IFL2|IPF20048.1	ORF|Uncharacterized	Protein similar to S. cerevisiae Cis3p, which has a role cell-wall-related processes; predicted Kex2p substrate; possibly an essential gene, disruptants not obtained by UAU1 method	Y83Y	C248T	orf19.555-P	1	NOISE
Ca21chrR_C_albicans_SC5314	1137620	T	C	89	61	16	54								UPSTREAM:orf19.1010-P	1	NOISE
Ca21chrR_C_albicans_SC5314	1146839	A	G	49	35	3	22								UPSTREAM:orf19.5289-P	1	NOISE
Ca21chrR_C_albicans_SC5314	1147709	G	A	55	60	15	41	orf19.5288.1			ORF|Uncharacterized		R23K	G67A	orf19.5288.1-P	1	NOISE
Ca21chrR_C_albicans_SC5314	1152224	A	G	65	70	16	54	orf19.5287		IPF3733.2|Contig4-3028_0003|orf6.3826|CA2074|CaO19.5287|IPF3733	ORF|Uncharacterized		T381A	A1140G	orf19.5287-P	1	NOISE
Ca21chrR_C_albicans_SC5314	1160421	A	G	91	91	23	51								UPSTREAM:orf19.3512-P	1	NOISE
Ca21chrR_C_albicans_SC5314	1173416	T	C	80	80	17	81	orf19.5851	STE13	orf19.13273|orf6.4953|IPF21356.1|IPF3786.1|Contig4-2975_0004|CA2882|CaO19.5851|CaO19.13273	ORF|Verified	Protein similar to S. cerevisiae Ste13p, which is a pheromone-processing dipeptidyl aminopeptidase; possible Kex2p substrate; transposon mutation affects filamentous growth; induced by low nitrogen, germ tube formation	N519N	T1556C	orf19.5851-P	1	NOISE
Ca21chrR_C_albicans_SC5314	1185883	A	G	96	69	20	75	orf19.5846		orf19.13268|IPF21363.1|IPF3776.1|Contig4-2975_0016|orf6.4948|CA2877|TFB2|CaO19.13268|CaO19.5846	ORF|Uncharacterized	Putative TFIIH and nucleotide excision repair factor 3 complex subunit; possibly an essential gene, disruptants not obtained by UAU1 method	T111T	A332G	orf19.5846-P	1	NOISE
Ca21chrR_C_albicans_SC5314	1194774	G	A	76	83	19	69	orf19.5843		orf19.13265|IPF21364.1|IPF4999.2|Contig4-3035_0022|orf6.4945|CA2874|CaO19.5843|IPF4999	ORF|Uncharacterized	Late-stage biofilm-induced gene; Plc1p-regulated; greater mRNA abundance observed in a cyr1 homozygous null mutant than in wild type	S44N	G130A	orf19.5843-P	1	NOISE
Ca21chrR_C_albicans_SC5314	1198997	A	G	86	65	18	86	orf19.6653		orf19.13974|IPF20507.1|IPF5002.2|Contig4-3035_0017|orf6.6550|CA4093|CaO19.6653|CaO19.13974|IPF5002	ORF|Uncharacterized	S. cerevisiae ortholog MTG2 has ribosome binding, has role in translation and localizes to mitochondrial inner membrane, extrinsic to membrane	Q513Q	A1538G	orf19.6653-P	1	NOISE
Ca21chrR_C_albicans_SC5314	1204003	G	T	58	67	25	58	orf19.6649	BRF1	orf19.13970|IPF20505.1|IPF5007.2|Contig4-3035_0013|orf6.6546|CA4090|CaO19.6649|CaO19.13970	ORF|Uncharacterized	Component of the general transcription factor for RNA polymerase III (TFIIIB); possibly an essential gene, disruptants not obtained by UAU1 method	A232S	G693T	orf19.6649-P	1	NOISE
Ca21chrR_C_albicans_SC5314	1213742	A	G	77	63	18	42	orf19.6640	TPS1	orf19.13961|IPF20512.1|IPF5016.2|Contig4-3035_0004|Contig4-3035_0005|orf6.6537|CA4084|CaO19.6640|CaO19.13961	ORF|Verified	Trehalose-6-phosphate synthase; role in hyphal growth and virulence in mouse systemic infection; upregulated in presence of human neutrophils; macrophage/pseudohyphal-repressed after 16h; stationary phase enriched protein; Hap43p-repressed	V8V	A23G	orf19.6640-P	1	NOISE
Ca21chrR_C_albicans_SC5314	1218563	T	G	176	0	78	9	orf19.6638	PTC4	orf19.13959|IPF20517.1|IPF15571.2|Contig4-2856_0010|orf6.6535|CA4082|CaO19.13959|CaO19.6638	ORF|Verified	Type PP2C serine/threonine phosphatase; localized to mitochondria; mutation causes sensitivity to sodium, potassium and azole drugs; decreased expression in hyphae compared to yeast-form cells	S127A	T378G	orf19.6638-P	1	NOISE
Ca21chrR_C_albicans_SC5314	1228395	G	A	74	61	11	34								UPSTREAM:orf19.6632-P	1	NOISE
Ca21chrR_C_albicans_SC5314	1231080	A	C	74	62	22	62	orf19.6629	ISC1	orf19.13950|IPF2542|IPF18948.2|IPF2542.2|Contig4-2480_0005|orf6.1512|orf6.6526|CA4076|CaO19.6629	ORF|Uncharacterized	Putative phospholipase C, possible neutral sphingomyelinase; not essential for viability	S344S	A1031C	orf19.6629-P	1	NOISE
Ca21chrR_C_albicans_SC5314	1237383	A	G	81	54	20	79	orf19.6624		orf19.13945|IPF20508.1|IPF2561.2|Contig4-2675_0004|orf6.6521|CA4071|CaO19.6624|GYP6|CaO19.13945|IPF2561	ORF|Uncharacterized		S143G	A426G	orf19.6624-P	1	NOISE
Ca21chrR_C_albicans_SC5314	1243493	A	C	68	0	48	8								UPSTREAM:orf19.6621-P	1	NOISE
Ca21chrR_C_albicans_SC5314	1245544	G	C	56	49	14	50	orf19.460	CEK2	orf19.8091|FUS3|IPF26875.1|IPF2568.2|ERK2|Contig4-2547_0006|orf6.2854|CA1378|CaO19.8091|CaO19.460	ORF|Verified	MAP kinase required for wild-type efficiency of mating; component of the signal transduction pathway that regulates mating; ortholog of S. cerevisiae Fus3p; induced by Cph1p, pheromone; transposon mutation affects filamentous growth	E321D	G962C	orf19.460-P	1	NOISE
Ca21chrR_C_albicans_SC5314	1251520	C	A	90	86	15	50								UPSTREAM:orf19.457-P	1	NOISE
Ca21chrR_C_albicans_SC5314	1297771	A	T	59	57	16	53	orf19.3861	SIS1	orf19.11342|IPF23398.1|IPF6598.2|Contig4-3046_0007|orf6.5251|CA3098|CaO19.3861|CaO19.11342	ORF|Uncharacterized	Putative Type II HSP40 co-chaperone; macrophage/pseudohyphal-repressed; heavy metal (cadmium) stress-induced; heterozygous null mutant displays sensitivity to virgineone	A72A	A215T	orf19.3861-P	1	NOISE
Ca21chrR_C_albicans_SC5314	1316005	T	C	63	48	17	39	orf19.3868		IPF28618.1|Contig4-1686_0002|orf6.1003|CaO19.3868	ORF|Dubious		F77F	T230C	orf19.3868-P	1	NOISE
Ca21chrR_C_albicans_SC5314	1334400	T	C	147	0	82	11	orf19.3879;orf19.3879.1		orf19.11360|IPF23388.1|IPF23406.1|IPF7771.2|IPF19992.1|Contig4-2958_0008|orf6.5850	ORF|Uncharacterized;blocked_reading_frame	Predicted ORF in Assemblies 19, 20 and 21; overlaps orf19.3879.1, which is a region annotated as blocked reading frame;Region annotated in Assembly 21 as a blocked reading frame, based on comparative genome analysis; overlaps orf19.3879, which is an open reading frame	N108N	T323C	orf19.3879-P	1	NOISE
Ca21chrR_C_albicans_SC5314	1341642	A	C	143	0	45	8								UPSTREAM:orf19.3886-P	1	NOISE
Ca21chrR_C_albicans_SC5314	1380873	A	G	62	63	12	58	orf19.720	GST3	orf19.8339|IPF17507.2|IPF19366.2|Contig4-1601_0003|orf6.1092|orf6.271|CA0303|CaO19.720|IPF17507	ORF|Uncharacterized	Putative glutathione S-transferase; expression is regulated upon white-opaque switching; upregulated in the presence of human neutrophils; peroxide-induced; induced in response to alpha pheromone in SpiderM medium	N24S	A70G	orf19.720-P	1	NOISE
Ca21chrR_C_albicans_SC5314	1400498	T	C	73	67	9	59	orf19.916		IPF19231.1|orf6.569|CA0117|CaO19.916|IPF19231	ORF|Uncharacterized	S. cerevisiae ortholog YNL305C localizes to fungal-type vacuole	C139R	T414C	orf19.916-P	1	NOISE
Ca21chrR_C_albicans_SC5314	1419879	C	T	80	62	25	72	orf19.696	STE2	orf19.8315|orf6.4012|orf 6.4012|IPF26602.1|IPF17255.2|CA2208|CaO19.8315|CaO19.696|IPF17255	ORF|Verified	Receptor for alpha factor mating pheromone, MFalpha; required for a-type cells to respond to alpha factor, for opaque a-form mating and white a-form response; possible Kex2p substrate; a-specific, alpha-factor induced, A1p-Alpha2p repressed	S388F	C1162T	orf19.696-P	1	NOISE
Ca21chrR_C_albicans_SC5314	1426784	T	G	55	74	6	50								UPSTREAM:orf19.698-P	1	NOISE
Ca21chrR_C_albicans_SC5314	1429604	C	T	77	56	19	82	orf19.700	SEO1	orf19.8319|orf6.3324|IPF12176.1|IPF29733.1|SEO2|Contig4-3021_0009|orf6.4008|CA2205	ORF|Uncharacterized	Protein with similarity to permeases; transcription is negatively regulated by Sfu1p; flucytosine induced; transcriptionally activated by Mnl1p under weak acid stress	A43A	C128T	orf19.700-P	1	NOISE
Ca21chrR_C_albicans_SC5314	1437837	T	C	71	59	5	55	orf19.702		orf19.8321|IPF26613.1|IPF7990.1|Contig4-2984_0007|orf6.3326|CA1702|CaO19.702|ECM32|CaO19.8321|HEL1	ORF|Uncharacterized	S. cerevisiae ortholog ECM32 has DNA helicase activity, has role in regulation of translational termination and localizes to polysome	C613R	T1836C	orf19.702-P	1	NOISE
Ca21chrR_C_albicans_SC5314	1450735	G	A	76	64	28	86	orf19.709	PUP2	orf19.8328|IPF26606.1|IPF12205.1|Contig4-2984_0023|Contig4-2984_0024|orf6.1729|CA0663|CaO19.709|CaO19.8328	ORF|Verified	Alpha5 subunit of the 20S proteasome; macrophage/pseudohyphal-repressed; regulated by Gcn2p and Gcn4p; protein present in exponential and stationary growth phase yeast cultures	G128G	G383A	orf19.709-P	1	NOISE
Ca21chrR_C_albicans_SC5314	1463186	G	C	54	48	28	68	orf19.1852		orf19.9410|IPF25475.1|IPF4674.2|Contig4-3021_0019|Contig4-3021_0020|orf6.5619|CA3370|CaO19.1852|CaO19.9410|IPF4674	ORF|Uncharacterized		V87L	G258C	orf19.1852-P	1	NOISE
Ca21chrR_C_albicans_SC5314	1465681	T	C	87	69	28	98	orf19.1849		orf19.9407|IPF25468.1|IPF4671.2|Contig4-3021_0024|Contig4-3021_0025|orf6.5616|CA3368|CaO19.1849|CaO19.9407|IPF4671	ORF|Uncharacterized	S. cerevisiae ortholog YIL091C has rRNA binding, U3 snoRNA binding and has role in maturation of SSU-rRNA from tricistronic rRNA transcript (SSU-rRNA, 5.8S rRNA, LSU-rRNA), ribosomal small subunit biogenesis	Y239Y	T716C	orf19.1849-P	1	NOISE
Ca21chrR_C_albicans_SC5314	1469260	A	G	91	73	26	89	orf19.1847	ARO10	orf19.9405|IPF4667.1|IPF29286.1|Contig4-3021_0028|orf6.5614|CA3367|CaO19.1847|CaO19.9405|IPF4667	ORF|Uncharacterized	Aromatic decarboxylase of the Ehrlich fusel oil pathway of aromatic alcohol biosynthesis; pH-regulated (alkaline downregulated); protein abundance is affected by URA3 expression in the CAI-4 strain background	G103G	A308G	orf19.1847-P	1	NOISE
Ca21chrR_C_albicans_SC5314	1485944	G	A	63	67	7	64								UPSTREAM:orf19.178-P	1	NOISE
Ca21chrR_C_albicans_SC5314	1486870	T	C	91	57	9	30	orf19.178		IPF17945.1|orf6.120|orf6.160|CA0025|CaO19.178|IPF17945	ORF|Uncharacterized		T231T	T692C	orf19.178-P	1	NOISE
Ca21chrR_C_albicans_SC5314	1507786	T	C	71	70	24	107	orf19.2364	MIS11	orf19.9900|IPF24960.1|IPF12851.2|Contig4-2886_0001|Contig4-2886_0002|orf6.4076|CA2250|CaO19.2364|ADE3|CaO19.9900	ORF|Uncharacterized	Similar to precursor of mitochondrial C1-tetrahydrofolate synthase; putative protein of glycine catabolism; downregulated by Efg1p; fluconazole-induced; stationary phase enriched protein	V211V	T632C	orf19.2364-P	1	NOISE
Ca21chrR_C_albicans_SC5314	1510502	T	C	63	46	9	39								UPSTREAM:orf19.2363-P	1	NOISE
Ca21chrR_C_albicans_SC5314	1512713	A	G	55	55	9	42								UPSTREAM:orf19.2361-P	1	NOISE
Ca21chrR_C_albicans_SC5314	1556961	C	G	64	57	16	64								UPSTREAM:orf19.10-P	1	NOISE
Ca21chrR_C_albicans_SC5314	1559510	G	A	68	75	24	96	orf19.734	GLK1	orf19.7686|orf19.8353|IPF27232.1|IPF11564.1|IPF26579.1|IPF16544.2|Contig4-1499_0002|Contig4-2506_0004|orf6.1703|orf6.6009|CA0263|orf19.13|CaO19.734|CaO19.8353	ORF|Uncharacterized	Putative glucokinase; transcription is regulated upon yeast-hyphal switch; transcriptionally regulated by Efg1p; fluconazole-induced; induced in core stress response; shows colony morphology-related gene regulation by Ssn6p	A136A	G407A	orf19.734-P	1	NOISE
Ca21chrR_C_albicans_SC5314	1563648	G	C	81	77	35	102	orf19.732		orf19.8351|IPF26584.1|IPF8391.2|Contig4-2668_0006|orf6.6011|CA3677|SOU3|CaO19.732|CaO19.8351	ORF|Uncharacterized	Transcription upregulated in both intermediate and mature biofilms	E106Q	G315C	orf19.732-P	1	NOISE
Ca21chrR_C_albicans_SC5314	1564301	C	T	42	50	11	37								UPSTREAM:orf19.731-P	1	NOISE
Ca21chrR_C_albicans_SC5314	1584729	T	C	47	65	15	46								UPSTREAM:orf19.6141-P	1	NOISE
Ca21chrR_C_albicans_SC5314	1586355	A	C	72	64	33	96	orf19.6140	FRE30	orf19.13559|FRE30.53|orf6.5674|CA3415|FRE30.53f|IPF17765.2	ORF|Uncharacterized	Protein with similarity to ferric reductases; downregulated in response to amphotericin B, estradiol, or ciclopirox olamine, and upregulated by interaction with macrophage; un-merged from orf19.6139 in a revision of Assembly 21	N16H	A45C	orf19.6140-P	1	NOISE
Ca21chrR_C_albicans_SC5314	1589698	T	C	61	57	30	87	orf19.6138		orf19.13557|IPF20976.1|IPF12773.2|CFL93|FRE6|FRE41|Contig4-2158_0004|orf6.5676|CA3417|CFL6|CaO19.6138|CaO19.13557	ORF|Uncharacterized	Protein similar to ferric reductase Fre10p; possibly an essential gene, disruptants not obtained by UAU1 method	V21A	T61C	orf19.6138-P	1	NOISE
Ca21chrR_C_albicans_SC5314	1592209	A	C	80	81	15	70								UPSTREAM:orf19.6137-P	1	NOISE
Ca21chrR_C_albicans_SC5314	1594335	A	G	65	76	31	108	orf19.6136		orf19.13555|IPF20986.1|IPF12778.1|Contig4-2201_0003|orf6.5678|CA3419|CaO19.6136|MRPL4|CaO19.13555|IPF12778	ORF|Uncharacterized	Predicted ORF in Assemblies 19, 20 and 21; repressed by nitric oxide	D260G	A778G	orf19.6136-P	1	NOISE
Ca21chrR_C_albicans_SC5314	1613128	T	C	63	80	26	95	orf19.6124	ACE2	orf19.13543|IPF20973.1|IPF9108.2|Contig4-2916_0014|orf6.5105|CA2996|CaO19.6124|CaO19.13543|IPF9108	ORF|Verified	Putative transcription factor involved in regulation of morphogenesis; required for wild-type cell separation, adherence, biofilm formation, and virulence in mouse; mutant is hyperfilamentous; similar to S. cerevisiae Ace2p and Swi5p	N427N	T1280C	orf19.6124-P	1	NOISE
Ca21chrR_C_albicans_SC5314	1624374	T	C	78	5	56	7								UPSTREAM:orf19.2620-P	1	NOISE
Ca21chrR_C_albicans_SC5314	1626964	C	A	106	7	94	25	orf19.2620		orf19.10151|IPF24715.1|IPF19693.1|orf6.1411|CaO19.2620|CaO19.10151	ORF|Uncharacterized		H210Q	C629A	orf19.2620-P	1	NOISE
Ca21chrR_C_albicans_SC5314	1638119	G	C	65	58	20	58	orf19.2625		orf19.10156|IPF24719.1|IPF29046.1|Contig4-2829_0006|orf6.2649|CaO19.10156|CaO19.2625	ORF|Dubious		E30Q	G87C	orf19.2625-P	1	NOISE
Ca21chrR_C_albicans_SC5314	1638734	T	C	57	60	13	62								UPSTREAM:orf19.2625-P	1	NOISE
Ca21chrR_C_albicans_SC5314	1664982	T	A	79	71	12	40								UPSTREAM:orf19.6284-P	1	NOISE
Ca21chrR_C_albicans_SC5314	1676528	C	A	68	74	16	78								UPSTREAM:orf19.1988-P	1	NOISE
Ca21chrR_C_albicans_SC5314	1678654	C	A	77	73	21	90	orf19.2633	HGT14	IPF8610.1|Contig4-2549_0002|orf6.1438|CA0480|QUP1|CaO19.2633|IPF8610	ORF|Uncharacterized	Putative glucose transporter of the major facilitator superfamily; 20 member C. albicans glucose transporter family; 12 probable membrane-spanning segments; expressed in rich medium with 2% glucose; late-stage biofilm-induced	S408S	C1223A	orf19.2633-P	1	NOISE
Ca21chrR_C_albicans_SC5314	1693000	A	T	88	73	25	111	orf19.3708	SAP2	orf19.11193|PRA|CAP|PRA11|SAP2x|PEP|PEP11|IPF23558.1|IPF9220.2|Contig4-2800_0001|orf6.5306|CA3138|CaO19.3708|CaO19.11193	ORF|Verified	Major secreted aspartyl proteinase, involved in utilization of protein as nitrogen source; assessment of virulence role complicated by URA3 effects; immunoprotective; regulated by growth, albumin, drugs, white cell-type; biofilm-induced	S92S	A275T	orf19.3708-P	1	NOISE
Ca21chrR_C_albicans_SC5314	1700670	A	C	130	1	64	21	orf19.3711		orf19.11196|IPF23551.1|IPF9214.2|Contig4-2800_0007|orf6.5309|CA3140|CaO19.11196|PHH2|CaO19.3711|IPF9214	ORF|Uncharacterized	Biofilm-induced gene	K207N	A620C	orf19.3711-P	1	NOISE
Ca21chrR_C_albicans_SC5314	1702368	G	A	69	58	9	45								UPSTREAM:orf19.3714-P	1	NOISE
Ca21chrR_C_albicans_SC5314	1705472	A	C	123	2	41	9								UPSTREAM:orf19.3713-P	1	NOISE
Ca21chrR_C_albicans_SC5314	1708492	G	A	86	64	18	74	orf19.3714		orf19.11199|IPF23552.1|IPF8295.2|Contig4-2908_0005|orf6.5312|CA3143|CaO19.3714|CaO19.11199|IPF8295	ORF|Uncharacterized		E513E	G1538A	orf19.3714-P	1	NOISE
Ca21chrR_C_albicans_SC5314	1739734	T	C	77	70	38	169	orf19.600	TRK1	orf19.8233|orf19.8235|IPF3557.2|IPF19076.2|Contig4-2930_0014|Contig4-2930_0017|orf6.4829|orf6.4831|orf6.993|CA2793|CA2792|orf19.602|TRK1.5f	ORF|Verified	Potassium transporter; mediates K+ and Cl- influx; role in sensitivity to cationic antimicrobial peptides, not by direct uptake, possibly related to membrane permeability; fungal-specific (no human or murine homolog); contains 5' UTR intron	G467G	T1400C	orf19.600-P	1	NOISE
Ca21chrR_C_albicans_SC5314	1743096	G	A	86	79	37	96	orf19.599		orf19.8232|IPF26728.1|IPF3553.2|Contig4-2930_0019|orf6.4832|orf6.992|CaO19.599	ORF|Dubious		R66Q	G196A	orf19.599-P	1	NOISE
Ca21chrR_C_albicans_SC5314	1749230	C	T	74	92	25	93								UPSTREAM:orf19.598-P	1	NOISE
Ca21chrR_C_albicans_SC5314	1756949	C	T	64	72	26	87	orf19.592		orf19.8224|IPF26710.1|IPF11869.2|Contig4-2431_0001|orf6.5688|CA3426|CaO19.8224|CaO19.592|IPF11869	ORF|Uncharacterized	Ortholog of S. cerevisiae YNL092W; Hap43p-repressed gene	G380G	C1139T	orf19.592-P	1	NOISE
Ca21chrR_C_albicans_SC5314	1757458	G	A	63	68	29	82	orf19.590		orf19.8222|IPF26715.1|IPF11865.1|orf6.5690|CA3427|CaO19.8222|CaO19.590|IPF11865	ORF|Uncharacterized	Putative thiamine biosynthesis enzyme; decreased expression in an ssr1 null mutant; protein present in exponential and stationary growth phase yeast cultures	*171*	G512A	orf19.590-P	1	NOISE
Ca21chrR_C_albicans_SC5314	1759725	C	T	51	58	18	74								UPSTREAM:orf19.6365-P	1	NOISE
Ca21chrR_C_albicans_SC5314	1765856	A	C	68	74	15	89	orf19.6369	RIO2	orf19.13726|IPF20732.1|IPF13458.2|orf6.5821|CA3535|CaO19.6369|CaO19.13726|IPF13458	ORF|Uncharacterized	Putative serine kinase with a predicted role in the processing of the 20S pre-rRNA into mature 18S rRNA; null mutants are hypersensitive to caspofungin	S39S	A116C	orf19.6369-P	1	NOISE
Ca21chrR_C_albicans_SC5314	1784670	A	G	60	71	0	137	orf19.6385	ACO1	orf19.13742|orf6.7870|ACON|IPF18134.2|IPF12652.2|Contig4-2922_0012|orf6.5837|CA3546|CaO19.13742|CaO19.6385	ORF|Verified	Aconitase; expression greater in high iron; 2 upstream CCAAT motifs; amino acid starvation (3-AT), amphotericin B, phagocytosis, farnesol induced; fluconazole-downregulated; Gcn4p-, Hap43p-regulated; Hap43p-repressed; antigenic in infection	S408S	A1223G	orf19.6385-P	1	NOISE
Ca21chrR_C_albicans_SC5314	1792586	T	G	60	70	0	55	orf19.6391		orf19.13749|IPF20748.1|IPF5131.1|IPF5131|Contig4-2922_0006|orf6.7863|CA5134|CaO19.13749|CaO19.6391	ORF|Uncharacterized	Increased transcription is observed in an azole-resistant strain that overexpresses MDR1	F49L	T146G	orf19.6391-P	1	NOISE
Ca21chrR_C_albicans_SC5314	1806079	A	T	70	85	0	85	orf19.6402	CYS3	orf19.13760|IPF20738.1|IPF5115.2|Contig4-2839_0007|orf6.7852|CA5127|CaO19.13760|CaO19.6402	ORF|Uncharacterized	Cystathionine gamma-lyase; upregulated by alkaline, biofilm, amphotericin B, heavy metal (cadmium) stress, oxidative stress (via Cap1p); possibly adherence-induced; Hog1p regulated; levels decrease in stationary phase yeast cells	T110T	A329T	orf19.6402-P	1	NOISE
Ca21chrR_C_albicans_SC5314	1811856	T	C	59	67	0	53								UPSTREAM:orf19.6403.1-P	1	NOISE
Ca21chrR_C_albicans_SC5314	1813466	T	C	56	65	0	52								UPSTREAM:orf19.6405-P	1	NOISE
Ca21chrR_C_albicans_SC5314	1814967	T	G	84	0	47	8	orf19.6407		orf19.13765|IPF20731.1|IPF1310.2|Contig4-3073_0027|Contig4-3073_0028|orf6.7847|CA5121|CaO19.13765|CaO19.6407|IPF1310	ORF|Uncharacterized	S. cerevisiae ortholog REH1 has role in ribosomal large subunit biogenesis and localizes to cytosolic large ribosomal subunit, cytoplasm, preribosome, large subunit precursor	V194G	T580G	orf19.6407-P	1	NOISE
Ca21chrR_C_albicans_SC5314	1901947	T	C	119	2	31	6								UPSTREAM:orf19.7281-P	1	NOISE
Ca21chrR_C_albicans_SC5314	1968322	T	C	104	6	42	7	pi-Rb		pi	long_terminal_repeat	Long terminal repeat (LTR); about 280 bp long, 17 copies per genome			UPSTREAM:orf19.7322-P	1	NOISE
Ca21chrR_C_albicans_SC5314	1982681	A	G	144	0	42	6	orf19.7330		IPF1983.1|Contig4-3033_0015|orf6.8411|CA5566|CaO19.7330|PET18	ORF|Uncharacterized	S. cerevisiae ortholog PET18 localizes to cytosol	T69A	A204G	orf19.7330-P	1	NOISE
Ca21chrR_C_albicans_SC5314	1996356	T	C	67	0	9	4								UPSTREAM:orf19.7336-P	1	NOISE
Ca21chrR_C_albicans_SC5314	1996358	A	G	70	0	10	4								UPSTREAM:orf19.7337-P	1	NOISE
Ca21chrR_C_albicans_SC5314	2006007	C	T	107	4	30	5								UPSTREAM:orf19.7339-P	1	NOISE
Ca21chrR_C_albicans_SC5314	2106830	T	G	153	0	53	8	orf19.7561	DEF1	IPF946.1|EDT1|Contig4-2780_0003|Contig4-3105_0026|Contig4-3105_0028|orf6.8909|CA5968|EED1|CaO19.7561|IPF946	ORF|Verified	Regulator of RNA polymerase II; required for filamentous growth and epithelial cell escape, dissemination in RHE model; induced by fluconazole, high cell density; Efg1p/hyphally regulated; role in adhesion and hyphal growth on solid surface	L206V	T615G	orf19.7561-P	1	NOISE
Ca21chrR_C_albicans_SC5314	2148750	A	C	133	2	58	7	orf19.7579	FGR34	IPF913.1|Contig4-3105_0067|orf6.8927|CA5983|CaO19.7579|IPF913	ORF|Verified	Protein lacking an ortholog in S. cerevisiae; transposon mutation affects filamentous growth	K225N	A674C	orf19.7579-P	1	NOISE
Ca21chrR_C_albicans_SC5314	2185119	A	C	164	0	55	12	orf19.7599	UTP5	IPF668.2|Contig4-3108_0035|orf6.8947|CA5999|CaO19.7599|IPF668	ORF|Verified	Putative U3 snoRNA-associated protein; Hap43p-induced gene; mutation confers resistance to 5-fluorocytosine (5-FC), 5-fluorouracil (5-FU), and tubercidin (7-deazaadenosine); physically interacts with TAP-tagged Nop1p	T216P	A645C	orf19.7599-P	1	NOISE
Ca21chrR_C_albicans_SC5314	2196998	C	A	150	1	29	8								UPSTREAM:orf19.7606-P	1	NOISE
Ca21chrR_C_albicans_SC5314	2215302	A	G	151	1	40	6	orf19.7614		IPF635|IPF635.1|Contig4-3108_0073|orf6.8962|CA6013|CaO19.7614	ORF|Uncharacterized	Hap43p-induced gene; not essential for viability	P320P	A959G	orf19.7614-P	1	NOISE
Ca21chrR_C_albicans_SC5314	2235555	T	G	126	0	56	8	orf19.7631	SLD5	IPF610.1|Contig4-3108_0098|orf6.8979|CA6026|CaO19.7631|IPF610	ORF|Uncharacterized	Putative GINS complex subunit; cell-cycle regulated periodic mRNA expression	V184G	T550G	orf19.7631-P	1	NOISE
Ca21chr1_C_albicans_SC5314	143471	C	A	36	66	0	36								UPSTREAM:orf19.6028-P	2	NOISE
Ca21chr1_C_albicans_SC5314	143472	T	C	36	69	1	35								UPSTREAM:orf19.6028-P	2	NOISE
Ca21chr1_C_albicans_SC5314	149045	T	G	115	0	39	6								UPSTREAM:orf19.6027-P	2	NOISE
Ca21chr1_C_albicans_SC5314	149786	T	A	66	66	7	24								UPSTREAM:orf19.6027-P	2	NOISE
Ca21chr1_C_albicans_SC5314	175371	T	G	92	85	17	43	orf19.6017		orf19.13438|IPF21049.1|IPF13839.1|Contig4-2810_0020|orf6.1429|CA0477|MCM1|CaO19.6017|CaO19.13438|IPF13839	ORF|Uncharacterized		A302A	T905G	orf19.6017-P	2	NOISE
Ca21chr1_C_albicans_SC5314	330195	A	T	69	68	10	40								UPSTREAM:orf19.3353-P	2	NOISE
Ca21chr1_C_albicans_SC5314	330230	T	C	64	63	17	47								UPSTREAM:orf19.3353-P	2	NOISE
Ca21chr1_C_albicans_SC5314	407260	C	T	124	0	70	10	orf19.4527	HGT1	orf19.12002|HGT11|IPF7518.2|IPF9983.2|Contig4-2702_0004|orf6.3044|orf6.6673|CA1506|CaO19.4527	ORF|Verified	High-affinity glucose transporter, member of major facilitator superfamily; transcription induced by progesterone and by drugs including chloramphenicol and benomyl; likely essential for growth, based on an insertional mutagenesis strategy	F190F	C569T	orf19.4527-P	2	NOISE
Ca21chr1_C_albicans_SC5314	407269	T	A	128	0	70	9	orf19.4527	HGT1	orf19.12002|HGT11|IPF7518.2|IPF9983.2|Contig4-2702_0004|orf6.3044|orf6.6673|CA1506|CaO19.4527	ORF|Verified	High-affinity glucose transporter, member of major facilitator superfamily; transcription induced by progesterone and by drugs including chloramphenicol and benomyl; likely essential for growth, based on an insertional mutagenesis strategy	A193A	T578A	orf19.4527-P	2	NOISE
Ca21chr1_C_albicans_SC5314	468145	T	A	73	2	10	4								UPSTREAM:orf19.3681-P	2	NOISE
Ca21chr1_C_albicans_SC5314	468165	T	A	100	0	14	5								UPSTREAM:orf19.3681-P	2	NOISE
Ca21chr1_C_albicans_SC5314	743389	A	C	171	0	57	8	orf19.3055		orf19.10573|IPF24291.1|IPF9268.2|Contig4-3098_0012|orf6.7792|CA5080|SRB4|IPF9268.3	ORF|Uncharacterized	Putative RNA polymerase II mediator complex subunit; possibly an essential gene, disruptants not obtained by UAU1 method	I343I	A1028C	orf19.3055-P	2	NOISE
Ca21chr1_C_albicans_SC5314	743393	G	T	158	0	58	8	orf19.3055		orf19.10573|IPF24291.1|IPF9268.2|Contig4-3098_0012|orf6.7792|CA5080|SRB4|IPF9268.3	ORF|Uncharacterized	Putative RNA polymerase II mediator complex subunit; possibly an essential gene, disruptants not obtained by UAU1 method	E345*	G1032T	orf19.3055-P	2	NOISE
Ca21chr1_C_albicans_SC5314	840647	C	T	120	0	31	5	orf19.4475	KTR4	orf19.11955|MNT4|IPF22771.1|IPF14377.2|Contig4-2993_0007|orf6.4312|CA2418|CaO19.11955|CaO19.4475	ORF|Verified	Mannosyltransferase; induced during cell wall regeneration; fungal-specific (no human or murine homolog)	L411L	C1230T	orf19.4475-P	2	NOISE
Ca21chr1_C_albicans_SC5314	840651	T	A	114	0	30	6	orf19.4475	KTR4	orf19.11955|MNT4|IPF22771.1|IPF14377.2|Contig4-2993_0007|orf6.4312|CA2418|CaO19.11955|CaO19.4475	ORF|Verified	Mannosyltransferase; induced during cell wall regeneration; fungal-specific (no human or murine homolog)	A409A	T1226A	orf19.4475-P	2	NOISE
Ca21chr1_C_albicans_SC5314	1006716	C	T	73	65	24	50	orf19.759		orf19.8379|IPF26509.1|IPF3905.2|Contig4-2890_0011|orf6.3638|CA1931|SEC21|CaO19.759|CaO19.8379|IPF3905	ORF|Uncharacterized	S. cerevisiae ortholog SEC21 has role in retrograde vesicle-mediated transport, Golgi to ER, ER to Golgi vesicle-mediated transport and localizes to COPI vesicle coat, endosome	N727N	C2180T	orf19.759-P	2	NOISE
Ca21chr1_C_albicans_SC5314	1006731	C	T	82	62	25	51	orf19.759		orf19.8379|IPF26509.1|IPF3905.2|Contig4-2890_0011|orf6.3638|CA1931|SEC21|CaO19.759|CaO19.8379|IPF3905	ORF|Uncharacterized	S. cerevisiae ortholog SEC21 has role in retrograde vesicle-mediated transport, Golgi to ER, ER to Golgi vesicle-mediated transport and localizes to COPI vesicle coat, endosome	H732H	C2195T	orf19.759-P	2	NOISE
Ca21chr1_C_albicans_SC5314	1083900	C	A	104	8	44	10	orf19.4056	BRG1	orf19.11538|IPF23188.1|IPF7666.2|Contig4-2593_0012|orf6.2451|CA1120|CaO19.11538|CaO19.4056|IPF7666|GAT2	ORF|Verified	Putative DNA-binding transcription factor; similar to S. cerevisiae Gat2p; transposon mutation affects filamentous growth; Hap43p-repressed gene; late-stage biofilm-induced	P408Q	C1222A	orf19.4056-P	2	NOISE
Ca21chr1_C_albicans_SC5314	1083903	C	A	106	9	41	12	orf19.4056	BRG1	orf19.11538|IPF23188.1|IPF7666.2|Contig4-2593_0012|orf6.2451|CA1120|CaO19.11538|CaO19.4056|IPF7666|GAT2	ORF|Verified	Putative DNA-binding transcription factor; similar to S. cerevisiae Gat2p; transposon mutation affects filamentous growth; Hap43p-repressed gene; late-stage biofilm-induced	P409Q	C1225A	orf19.4056-P	2	NOISE
Ca21chr1_C_albicans_SC5314	1100668	T	G	56	1	19	4								UPSTREAM:orf19.446-P	2	NOISE
Ca21chr1_C_albicans_SC5314	1100724	C	T	60	53	8	35								UPSTREAM:orf19.446-P	2	NOISE
Ca21chr1_C_albicans_SC5314	1138491	G	A	122	6	41	6	orf19.422	SPT20	orf19.8052|IPF18537.2|IPF10486.2|orf6.3893|orf6.6491|orf6.772|CA0180|CaO19.422	ORF|Uncharacterized	Putative transcription factor; downregulated upon adherence to polystyrene; flucytosine repressed	Q54Q	G161A	orf19.422-P	2	NOISE
Ca21chr1_C_albicans_SC5314	1138494	G	A	127	4	44	6	orf19.422	SPT20	orf19.8052|IPF18537.2|IPF10486.2|orf6.3893|orf6.6491|orf6.772|CA0180|CaO19.422	ORF|Uncharacterized	Putative transcription factor; downregulated upon adherence to polystyrene; flucytosine repressed	Q55Q	G164A	orf19.422-P	2	NOISE
Ca21chr1_C_albicans_SC5314	1141854	C	T	89	87	19	42	orf19.419		orf19.8049|IPF10490.2|IPF29828.1|Contig4-2233_0002|orf6.3896|CA2124|CaO19.419|IPF10490	ORF|Uncharacterized	Biofilm-induced gene	L343L	C1026T	orf19.419-P	2	NOISE
Ca21chr1_C_albicans_SC5314	1141898	A	G	86	80	22	47	orf19.419		orf19.8049|IPF10490.2|IPF29828.1|Contig4-2233_0002|orf6.3896|CA2124|CaO19.419|IPF10490	ORF|Uncharacterized	Biofilm-induced gene	H328R	A982G	orf19.419-P	2	NOISE
Ca21chr1_C_albicans_SC5314	1190076	G	T	129	4	31	6								UPSTREAM:orf19.2483-P	2	NOISE
Ca21chr1_C_albicans_SC5314	1190087	G	T	133	2	31	6								UPSTREAM:orf19.2483-P	2	NOISE
Ca21chr1_C_albicans_SC5314	1271641	A	G	90	78	5	23	orf19.2439.1		IPF24823.1|IPF16566.2|CA1916|IPF16566.3	ORF|Uncharacterized	S. cerevisiae ortholog QCR10 has ubiquinol-cytochrome-c reductase activity, has role in aerobic respiration, mitochondrial electron transport, ubiquinol to cytochrome c and localizes to mitochondrial respiratory chain complex III	Intronic	Intronic	orf19.2439.1-P	2	NOISE
Ca21chr1_C_albicans_SC5314	1271668	G	A	93	102	4	19	orf19.2439.1		IPF24823.1|IPF16566.2|CA1916|IPF16566.3	ORF|Uncharacterized	S. cerevisiae ortholog QCR10 has ubiquinol-cytochrome-c reductase activity, has role in aerobic respiration, mitochondrial electron transport, ubiquinol to cytochrome c and localizes to mitochondrial respiratory chain complex III	Intronic	Intronic	orf19.2439.1-P	2	NOISE
Ca21chr1_C_albicans_SC5314	1272824	C	T	37	109	8	32								UPSTREAM:orf19.2438-P	2	NOISE
Ca21chr1_C_albicans_SC5314	1272825	T	C	17	103	4	30								UPSTREAM:orf19.2438-P	2	NOISE
Ca21chr1_C_albicans_SC5314	1290706	T	A	167	0	44	6	orf19.2429		orf19.9965|IPF24841.1|IPF19572.1|IPF19573.1|Contig4-2898_0011|orf6.333|orf6.1392|CA0053|orf19.380|CaO19.9965|LPF18|CaO19.2429	ORF|Uncharacterized	Predicted ORF in Assemblies 19, 20 and 21; transcription is induced in response to alpha pheromone in SpiderM medium	F330Y	T988A	orf19.2429-P	2	NOISE
Ca21chr1_C_albicans_SC5314	1290710	G	A	161	1	45	7	orf19.2429		orf19.9965|IPF24841.1|IPF19572.1|IPF19573.1|Contig4-2898_0011|orf6.333|orf6.1392|CA0053|orf19.380|CaO19.9965|LPF18|CaO19.2429	ORF|Uncharacterized	Predicted ORF in Assemblies 19, 20 and 21; transcription is induced in response to alpha pheromone in SpiderM medium	E331E	G992A	orf19.2429-P	2	NOISE
Ca21chr1_C_albicans_SC5314	1309923	A	T	129	4	85	9	orf19.1824	PGA50	orf19.9383|IPF25501.1|IPF14706.2|Contig4-2618_0008|orf6.3431|CA1777|CaO19.9383|CaO19.1824|IPF14706	ORF|Uncharacterized	Putative GPI-anchored protein; adhesin-like protein	Q122S	A364T	orf19.1824-P	2	NOISE
Ca21chr1_C_albicans_SC5314	1309928	G	A	134	4	82	9	orf19.1824	PGA50	orf19.9383|IPF25501.1|IPF14706.2|Contig4-2618_0008|orf6.3431|CA1777|CaO19.9383|CaO19.1824|IPF14706	ORF|Uncharacterized	Putative GPI-anchored protein; adhesin-like protein	G124S	G369A	orf19.1824-P	2	NOISE
Ca21chr1_C_albicans_SC5314	1318847	T	G	108	2	21	5								UPSTREAM:orf19.1822-P	2	NOISE
Ca21chr1_C_albicans_SC5314	1319789	G	A	118	0	24	6								UPSTREAM:orf19.1822-P	2	NOISE
Ca21chr1_C_albicans_SC5314	1498264	A	G	26	98	3	87	orf19.6202	RBT4	orf19.13583|orf6.537|YJL79|PRY4|IPF8153.3|IPF27769.1|Contig4-2876_0017|orf6.5422|CA0104|IPF8153.2	ORF|Verified	Protein similar to plant pathogenesis-related proteins; required for virulence in mouse systemic and rabbit corneal infections; not required for filamentation; mRNA binds to She3p and is localized to hyphal tips; Hap43p-induced gene	T264T	A791G	orf19.6202-P	2	NOISE
Ca21chr1_C_albicans_SC5314	1498265	G	T	26	95	3	87	orf19.6202	RBT4	orf19.13583|orf6.537|YJL79|PRY4|IPF8153.3|IPF27769.1|Contig4-2876_0017|orf6.5422|CA0104|IPF8153.2	ORF|Verified	Protein similar to plant pathogenesis-related proteins; required for virulence in mouse systemic and rabbit corneal infections; not required for filamentation; mRNA binds to She3p and is localized to hyphal tips; Hap43p-induced gene	S264I	G790T	orf19.6202-P	2	NOISE
Ca21chr1_C_albicans_SC5314	1659658	C	T	97	0	41	6								UPSTREAM:orf19.2778-P	2	NOISE
Ca21chr1_C_albicans_SC5314	1659660	T	C	100	0	41	6								UPSTREAM:orf19.2778-P	2	NOISE
Ca21chr1_C_albicans_SC5314	1867816	T	C	72	61	18	41								UPSTREAM:orf19.398-P	2	NOISE
Ca21chr1_C_albicans_SC5314	1867825	G	A	74	51	17	39								UPSTREAM:orf19.398-P	2	NOISE
Ca21chr1_C_albicans_SC5314	1995679	A	G	127	7	51	7								UPSTREAM:orf19.4771-P	2	NOISE
Ca21chr1_C_albicans_SC5314	1996309	G	A	95	8	29	5								UPSTREAM:orf19.4771-P	2	NOISE
Ca21chr1_C_albicans_SC5314	2000062	T	C	72	82	18	41	orf19.4772	SSU81	orf19.12235|IPF19613.2|IPF19612.1|Contig4-1937_0004|orf6.3983|orf6.920|SHO1|CA2188|CaO19.4772	ORF|Verified	Predicted adaptor protein involved in activation of MAP kinase-dependent signaling pathways; links response to oxidative stress to morphogenesis and cell wall biosynthesis; caspofungin repressed	V227A	T679C	orf19.4772-P	2	NOISE
Ca21chr1_C_albicans_SC5314	2000088	A	G	74	75	17	42	orf19.4772	SSU81	orf19.12235|IPF19613.2|IPF19612.1|Contig4-1937_0004|orf6.3983|orf6.920|SHO1|CA2188|CaO19.4772	ORF|Verified	Predicted adaptor protein involved in activation of MAP kinase-dependent signaling pathways; links response to oxidative stress to morphogenesis and cell wall biosynthesis; caspofungin repressed	K218K	A653G	orf19.4772-P	2	NOISE
Ca21chr1_C_albicans_SC5314	2036240	A	C	66	69	13	35								UPSTREAM:orf19.4785-P	2	NOISE
Ca21chr1_C_albicans_SC5314	2036243	T	G	57	72	14	34								UPSTREAM:orf19.4785-P	2	NOISE
Ca21chr1_C_albicans_SC5314	2225198	T	C	12	50	2	24								UPSTREAM:orf19.4883-P	2	NOISE
Ca21chr1_C_albicans_SC5314	2225235	G	A	27	55	4	22								UPSTREAM:orf19.4883-P	2	NOISE
Ca21chr1_C_albicans_SC5314	2228270	T	G	90	7	17	4								UPSTREAM:orf19.4884-P	2	NOISE
Ca21chr1_C_albicans_SC5314	2408363	C	T	75	88	18	41	orf19.2330		orf19.9866|IPF24986.1|IPF13361.2|orf6.5578|YOR205C|CA3342|CaO19.9866|UTP6|CaO19.2330|IPF13361	ORF|Verified	Putative U3 snoRNA-associated protein; Hap43p-induced gene; transposon mutation affects filamentous growth; decreased expression in response to prostaglandins	F169F	C506T	orf19.2330-P	2	NOISE
Ca21chr1_C_albicans_SC5314	2408386	C	T	74	78	14	37	orf19.2330		orf19.9866|IPF24986.1|IPF13361.2|orf6.5578|YOR205C|CA3342|CaO19.9866|UTP6|CaO19.2330|IPF13361	ORF|Verified	Putative U3 snoRNA-associated protein; Hap43p-induced gene; transposon mutation affects filamentous growth; decreased expression in response to prostaglandins	S177L	C529T	orf19.2330-P	2	NOISE
Ca21chr1_C_albicans_SC5314	2520201	G	A	75	6	21	5								UPSTREAM:orf19.656-P	2	NOISE
Ca21chr1_C_albicans_SC5314	2524496	A	T	75	66	18	44								UPSTREAM:orf19.656-P	2	NOISE
Ca21chr1_C_albicans_SC5314	2700253	A	G	39	121	8	50								UPSTREAM:orf19.5225-P	2	NOISE
Ca21chr1_C_albicans_SC5314	2700254	G	T	39	119	7	50								UPSTREAM:orf19.5225-P	2	NOISE
Ca21chr1_C_albicans_SC5314	2790703	T	C	71	76	19	42	orf19.6341		orf19.13697|IPF20803.1|IPF17066.2|Contig4-1616_0004|orf6.5770|CA3495|CaO19.13697|RIB7|CaO19.6341	ORF|Uncharacterized	S. cerevisiae ortholog RIB7 has 5-amino-6-(5-phosphoribosylamino)uracil reductase activity and has role in riboflavin biosynthetic process	Y119H	T354C	orf19.6341-P	2	NOISE
Ca21chr1_C_albicans_SC5314	2790825	A	C	107	4	24	7	orf19.6341		orf19.13697|IPF20803.1|IPF17066.2|Contig4-1616_0004|orf6.5770|CA3495|CaO19.13697|RIB7|CaO19.6341	ORF|Uncharacterized	S. cerevisiae ortholog RIB7 has 5-amino-6-(5-phosphoribosylamino)uracil reductase activity and has role in riboflavin biosynthetic process	V159V	A476C	orf19.6341-P	2	NOISE
Ca21chr1_C_albicans_SC5314	2920340	T	C	109	6	43	8	orf19.4966		orf19.12431|IPF16755|IPF22217.1|IPF16755.2|Contig4-2421_0001|orf6.2839|YPR021C|CA1367|AGC1|CaO19.4966|CaO19.12431	ORF|Verified	Putative mitochondrial carrier protein; transcription is alkaline upregulated	S681S	T2042C	orf19.4966-P	2	NOISE
Ca21chr1_C_albicans_SC5314	2920345	A	T	107	6	42	8	orf19.4966		orf19.12431|IPF16755|IPF22217.1|IPF16755.2|Contig4-2421_0001|orf6.2839|YPR021C|CA1367|AGC1|CaO19.4966|CaO19.12431	ORF|Verified	Putative mitochondrial carrier protein; transcription is alkaline upregulated	T680S	A2037T	orf19.4966-P	2	NOISE
Ca21chr1_C_albicans_SC5314	2922495	A	C	62	67	9	30								UPSTREAM:orf19.4966-P	2	NOISE
Ca21chr1_C_albicans_SC5314	2922515	C	A	56	59	10	28								UPSTREAM:orf19.4966-P	2	NOISE
Ca21chr1_C_albicans_SC5314	3114487	A	G	132	1	46	6	orf19.7219	FTR1	orf6.8119|IPF868.1|Contig4-3043_0004|CA5345|CaO19.7219	ORF|Verified	High-affinity iron permease; required for mouse virulence, low-iron growth; iron, amphotericin B, caspofungin, ciclopirox, Hog1p regulated; complements S. cerevisiae ftr1 iron transport; Hap43p-repressed gene	I228V	A681G	orf19.7219-P	2	NOISE
Ca21chr1_C_albicans_SC5314	3114489	T	C	139	0	45	6	orf19.7219	FTR1	orf6.8119|IPF868.1|Contig4-3043_0004|CA5345|CaO19.7219	ORF|Verified	High-affinity iron permease; required for mouse virulence, low-iron growth; iron, amphotericin B, caspofungin, ciclopirox, Hog1p regulated; complements S. cerevisiae ftr1 iron transport; Hap43p-repressed gene	I228I	T683C	orf19.7219-P	2	NOISE
Ca21chr1_C_albicans_SC5314	3128903	C	G	156	0	54	9	orf19.7229	IML2	IPF855.1|Contig4-3043_0019|orf6.8129|CA5353|CaO19.7229	ORF|Uncharacterized	Hap43p-repressed gene; early-stage biofilm-induced	P855A	C2562G	orf19.7229-P	2	NOISE
Ca21chr1_C_albicans_SC5314	3130260	T	G	175	2	82	10	orf19.7229	IML2	IPF855.1|Contig4-3043_0019|orf6.8129|CA5353|CaO19.7229	ORF|Uncharacterized	Hap43p-repressed gene; early-stage biofilm-induced	P402P	T1205G	orf19.7229-P	2	NOISE
Ca21chr2_C_albicans_SC5314	5317	G	C	140	9	47	18								UPSTREAM:orf19.1923-P	2	NOISE
Ca21chr2_C_albicans_SC5314	5341	A	G	126	10	44	21								UPSTREAM:orf19.1923-P	2	NOISE
Ca21chr2_C_albicans_SC5314	128881	A	G	19	107	5	36								UPSTREAM:orf19.2050-P	2	NOISE
Ca21chr2_C_albicans_SC5314	128883	A	T	19	109	5	37								UPSTREAM:orf19.2050-P	2	NOISE
Ca21chr2_C_albicans_SC5314	221844	T	C	19	105	5	35								UPSTREAM:orf19.1995-P	2	NOISE
Ca21chr2_C_albicans_SC5314	221846	C	G	19	105	5	35								UPSTREAM:orf19.1995-P	2	NOISE
Ca21chr2_C_albicans_SC5314	299456	A	G	147	1	43	6	orf19.1478	STT3	orf19.9053|IPF25749.1|IPF4396.1|Contig4-3015_0004|Contig4-3015_0005|orf6.7095|CA4528|CaO19.1478|CaO19.9053	ORF|Verified	Putative oligosaccharyltransferase complex component	N685S	A2053G	orf19.1478-P	2	NOISE
Ca21chr2_C_albicans_SC5314	300994	A	C	150	2	28	5	orf19.1478	STT3	orf19.9053|IPF25749.1|IPF4396.1|Contig4-3015_0004|Contig4-3015_0005|orf6.7095|CA4528|CaO19.1478|CaO19.9053	ORF|Verified	Putative oligosaccharyltransferase complex component	G172G	A515C	orf19.1478-P	2	NOISE
Ca21chr2_C_albicans_SC5314	375257	T	A	138	8	70	10	orf19.1510	SDF1	orf19.9085|IPF9282|IPF25762.1|IPF9282.2|Contig4-1782_0005|orf6.3961|CA2178|CaO19.9085|CaO19.1510	ORF|Uncharacterized	Protein not essential for viability	D401E	T1202A	orf19.1510-P	2	NOISE
Ca21chr2_C_albicans_SC5314	375730	T	G	160	0	55	7	orf19.1510	SDF1	orf19.9085|IPF9282|IPF25762.1|IPF9282.2|Contig4-1782_0005|orf6.3961|CA2178|CaO19.9085|CaO19.1510	ORF|Uncharacterized	Protein not essential for viability	S244A	T729G	orf19.1510-P	2	NOISE
Ca21chr2_C_albicans_SC5314	707978	C	T	15	74	1	56	orf19.882	HSP78	orf19.8501|orf19.8503|IPF26442.1|IPF26425.1|IPF9007.2|IPF9010.2|Contig4-2772_0009|Contig4-2772_0010|orf6.7293|orf6.7295|CA4684|CA4683|orf19.884|HSP78.5f	ORF|Uncharacterized	Putative heat-shock protein; transcriptionally regulated by macrophage response; transcription is regulated by Nrg1p, Mig1p, Gcn2p, Gcn4p, Mnl1p; heavy metal (cadmium) stress-induced; stationary phase enriched protein	F547F	C1640T	orf19.882-P	2	NOISE
Ca21chr2_C_albicans_SC5314	707984	A	T	16	62	1	51	orf19.882	HSP78	orf19.8501|orf19.8503|IPF26442.1|IPF26425.1|IPF9007.2|IPF9010.2|Contig4-2772_0009|Contig4-2772_0010|orf6.7293|orf6.7295|CA4684|CA4683|orf19.884|HSP78.5f	ORF|Uncharacterized	Putative heat-shock protein; transcriptionally regulated by macrophage response; transcription is regulated by Nrg1p, Mig1p, Gcn2p, Gcn4p, Mnl1p; heavy metal (cadmium) stress-induced; stationary phase enriched protein	K545N	A1634T	orf19.882-P	2	NOISE
Ca21chr2_C_albicans_SC5314	934651	T	C	118	0	45	6								UPSTREAM:orf19.4505-P	2	NOISE
Ca21chr2_C_albicans_SC5314	934661	G	A	110	0	46	6								UPSTREAM:orf19.4505-P	2	NOISE
Ca21chr2_C_albicans_SC5314	982069	T	A	89	5	17	4								UPSTREAM:orf19.147-P	2	NOISE
Ca21chr2_C_albicans_SC5314	982133	T	G	25	62	3	18								UPSTREAM:orf19.147-P	2	NOISE
Ca21chr2_C_albicans_SC5314	982711	C	T	25	131	19	65	orf19.151	TPO5	orf19.7792|IPF19097.2|IPF17861.2|IPF19195.1|orf6.662|orf6.76|orf6.660|CA0144|CA0143|orf19.153|CaO19.151|IPF19195.3f	ORF|Verified	Putative polyamine transporter; mutation confers hypersensitivity to toxic ergosterol analog; hyphal induced; macrophage induced	A583V	C1747T	orf19.151-P	2	NOISE
Ca21chr2_C_albicans_SC5314	983305	C	A	109	7	26	9	orf19.151	TPO5	orf19.7792|IPF19097.2|IPF17861.2|IPF19195.1|orf6.662|orf6.76|orf6.660|CA0144|CA0143|orf19.153|CaO19.151|IPF19195.3f	ORF|Verified	Putative polyamine transporter; mutation confers hypersensitivity to toxic ergosterol analog; hyphal induced; macrophage induced	S385Y	C1153A	orf19.151-P	2	NOISE
Ca21chr2_C_albicans_SC5314	990393	A	C	91	112	23	49								UPSTREAM:orf19.156-P	2	NOISE
Ca21chr2_C_albicans_SC5314	990557	T	G	119	6	59	7								UPSTREAM:orf19.156-P	2	NOISE
Ca21chr2_C_albicans_SC5314	1301984	A	G	7	34	1	15								UPSTREAM:orf19.17-P	2	NOISE
Ca21chr2_C_albicans_SC5314	1301986	C	T	7	36	1	15								UPSTREAM:orf19.17-P	2	NOISE
Ca21chr2_C_albicans_SC5314	1333005	T	G	107	3	29	6								UPSTREAM:orf19.33-P	2	NOISE
Ca21chr2_C_albicans_SC5314	1333438	A	C	147	0	60	8	tara-2a		tara	long_terminal_repeat	Long terminal repeat (LTR); about 285 bp long, 9 copies per genome			UPSTREAM:orf19.33-P	2	NOISE
Ca21chr2_C_albicans_SC5314	1354557	C	T	83	2	30	5								UPSTREAM:orf19.1295-P	2	NOISE
Ca21chr2_C_albicans_SC5314	1354562	A	T	60	1	22	5								UPSTREAM:orf19.1295-P	2	NOISE
Ca21chr2_C_albicans_SC5314	1365308	A	C	101	6	42	6	orf19.1224	FRP3	orf19.8810|IPF13846.3|IPF16160.1|Contig4-2326_0009|orf6.1315|orf6.361|CA0415|AFF1|CaO19.1224|ATO3	ORF|Verified	Putative ammonium transporter; upregulated in the presence of human neutrophils; fluconazole-downregulated; repressed by nitric oxide	N31H	A90C	orf19.1224-P	2	NOISE
Ca21chr2_C_albicans_SC5314	1365311	A	C	91	7	39	6	orf19.1224	FRP3	orf19.8810|IPF13846.3|IPF16160.1|Contig4-2326_0009|orf6.1315|orf6.361|CA0415|AFF1|CaO19.1224|ATO3	ORF|Verified	Putative ammonium transporter; upregulated in the presence of human neutrophils; fluconazole-downregulated; repressed by nitric oxide	N32H	A93C	orf19.1224-P	2	NOISE
Ca21chr2_C_albicans_SC5314	1502261	A	T	78	67	16	39	orf19.1901	MCM3	orf19.9457|IPF25419.1|IPF9716.2|Contig4-2752_0015|orf6.7019|CA4471|CaO19.9457|CaO19.1901	ORF|Uncharacterized	Putative DNA replication protein; periodic mRNA expression, peak at cell-cycle M/G1 phase	G540G	A1619T	orf19.1901-P	2	NOISE
Ca21chr2_C_albicans_SC5314	1502264	G	A	77	75	14	39	orf19.1901	MCM3	orf19.9457|IPF25419.1|IPF9716.2|Contig4-2752_0015|orf6.7019|CA4471|CaO19.9457|CaO19.1901	ORF|Uncharacterized	Putative DNA replication protein; periodic mRNA expression, peak at cell-cycle M/G1 phase	E541E	G1622A	orf19.1901-P	2	NOISE
Ca21chr2_C_albicans_SC5314	1666355	C	A	69	127	43	103	Tca3-2;orf19.2219	ORF298	TCA3;orf19.9710|orf19.9764|IPF25169.1|IPF4068.2|IPF25165.1|IPF29182.1|Contig4-2502_0009|Contig4-2502_0010|orf6.1312|orf6.4264|POL|CA0414|orf19.2164|POL94|CaO19.9764|CaO19.2219	retrotransposon;ORF|Uncharacterized|transposable element gene	Retrotransposon Tca3 on Chromosome 2, about 6.1 kbp member of the gypsy group with an ORF similar to Gag and Pol, flanked by 300-bp LTRs (nu elements);Predicted ORF in retrotransposon Tca3 with similarity to Gag-Pol, which encodes nucleocapsid-like protein, reverse transcriptase, protease, and integrase; transcription is a-specific, alpha-factor induced; mRNA binds to She3p	P181T	C540A	orf19.2219-P	2	NOISE
Ca21chr2_C_albicans_SC5314	1668670	C	T	82	127	47	113	Tca3-2;orf19.2219	ORF298	TCA3;orf19.9710|orf19.9764|IPF25169.1|IPF4068.2|IPF25165.1|IPF29182.1|Contig4-2502_0009|Contig4-2502_0010|orf6.1312|orf6.4264|POL|CA0414|orf19.2164|POL94|CaO19.9764|CaO19.2219	retrotransposon;ORF|Uncharacterized|transposable element gene	Retrotransposon Tca3 on Chromosome 2, about 6.1 kbp member of the gypsy group with an ORF similar to Gag and Pol, flanked by 300-bp LTRs (nu elements);Predicted ORF in retrotransposon Tca3 with similarity to Gag-Pol, which encodes nucleocapsid-like protein, reverse transcriptase, protease, and integrase; transcription is a-specific, alpha-factor induced; mRNA binds to She3p	T952T	C2855T	orf19.2219-P	2	NOISE
Ca21chr2_C_albicans_SC5314	1741344	T	C	66	54	7	24								UPSTREAM:orf19.3618-P	2	NOISE
Ca21chr2_C_albicans_SC5314	1746668	T	C	120	10	39	6								UPSTREAM:orf19.3618-P	2	NOISE
Ca21chr2_C_albicans_SC5314	1789431	C	T	73	58	16	37	orf19.3591	APE3	orf19.11073|IPF17873.2|IPF16625.2|Contig4-2320_0004|Contig4-2320_0005|orf6.2049|orf6.806|CA0871|CaO19.3591	ORF|Uncharacterized	Putative vacuolar aminopeptidase Y,; regulated by Gcn2p and Gcn4p	P123P	C368T	orf19.3591-P	2	NOISE
Ca21chr2_C_albicans_SC5314	1789440	G	A	73	62	15	37	orf19.3591	APE3	orf19.11073|IPF17873.2|IPF16625.2|Contig4-2320_0004|Contig4-2320_0005|orf6.2049|orf6.806|CA0871|CaO19.3591	ORF|Uncharacterized	Putative vacuolar aminopeptidase Y,; regulated by Gcn2p and Gcn4p	M120I	G359A	orf19.3591-P	2	NOISE
Ca21chr2_C_albicans_SC5314	1929752	A	T	148	12	41	6	CEN2;epsilon-2a		epsilon	centromere;long_terminal_repeat	Centromere region of Chromosome 2; each centromere mediates a single kinetochore attachment although it binds multiple (four) Cse4p-containing nucleosomes;Long terminal repeat (LTR); about 480 bp long, 9 copies per genome			UPSTREAM:orf19.1406-P	2	NOISE
Ca21chr2_C_albicans_SC5314	1929759	A	T	148	13	43	6	CEN2;epsilon-2a		epsilon	centromere;long_terminal_repeat	Centromere region of Chromosome 2; each centromere mediates a single kinetochore attachment although it binds multiple (four) Cse4p-containing nucleosomes;Long terminal repeat (LTR); about 480 bp long, 9 copies per genome			UPSTREAM:orf19.1406-P	2	NOISE
Ca21chr2_C_albicans_SC5314	1965089	A	T	156	0	27	6								UPSTREAM:orf19.1395-P	2	NOISE
Ca21chr2_C_albicans_SC5314	1965092	A	T	155	0	27	6								UPSTREAM:orf19.1395-P	2	NOISE
Ca21chr2_C_albicans_SC5314	2045885	C	T	105	8	44	7	orf19.1783	YOR1	orf19.9349|orf19.9350|IPF16207.2|IPF25550.1|IPF13015.2|IPF13016.2|Contig4-2624_0003|Contig4-2624_0004|orf6.2530|orf6.2531|orf6.531|CA6193|CA6194|orf19.1784|YOR1.5f	ORF|Uncharacterized	Protein similar to S. cerevisiae Yor1p, which is a plasma membrane transporter of the ATP-binding cassette (ABC) family involved in resistance to aureobasidin A; transcription is specific to white cell type	A509V	C1525T	orf19.1783-P	2	NOISE
Ca21chr2_C_albicans_SC5314	2045897	C	A	166	5	54	9	orf19.1783	YOR1	orf19.9349|orf19.9350|IPF16207.2|IPF25550.1|IPF13015.2|IPF13016.2|Contig4-2624_0003|Contig4-2624_0004|orf6.2530|orf6.2531|orf6.531|CA6193|CA6194|orf19.1784|YOR1.5f	ORF|Uncharacterized	Protein similar to S. cerevisiae Yor1p, which is a plasma membrane transporter of the ATP-binding cassette (ABC) family involved in resistance to aureobasidin A; transcription is specific to white cell type	A505D	C1513A	orf19.1783-P	2	NOISE
Ca21chr2_C_albicans_SC5314	2098162	C	T	111	5	33	6								UPSTREAM:orf19.1760-P	2	NOISE
Ca21chr2_C_albicans_SC5314	2098164	A	G	106	5	31	7								UPSTREAM:orf19.1760-P	2	NOISE
Ca21chr3_C_albicans_SC5314	236851	C	A	144	13	52	14	orf19.3153	MSS4	orf19.10663|IPF24141.1|IPF15141.2|Contig4-2116_0004|orf6.1660|CA0623|CaO19.3153|MSS4.3f|MSS4.3	ORF|Verified	Phosphatidylinositol-4-phosphate 5-kinase; activity induced by phosphatidic acid (Pld1p product); macrophage/pseudohyphal-repressed; mRNA binds to She3p and is localized to yeast cell buds and hyphal tips; Hap43p-induced gene	H92Q	C275A	orf19.3153-P	2	NOISE
Ca21chr3_C_albicans_SC5314	236854	A	C	153	10	63	9	orf19.3153	MSS4	orf19.10663|IPF24141.1|IPF15141.2|Contig4-2116_0004|orf6.1660|CA0623|CaO19.3153|MSS4.3f|MSS4.3	ORF|Verified	Phosphatidylinositol-4-phosphate 5-kinase; activity induced by phosphatidic acid (Pld1p product); macrophage/pseudohyphal-repressed; mRNA binds to She3p and is localized to yeast cell buds and hyphal tips; Hap43p-induced gene	Q93H	A278C	orf19.3153-P	2	NOISE
Ca21chr3_C_albicans_SC5314	518996	C	T	152	0	43	6	orf19.1607	ALR1	orf19.9175|IPF13562.2|IPF14418.3|Contig4-2034_0002|Contig4-2034_0003|Contig4-2034_0004|Contig4-2260_0010|orf6.1088|orf6.1933|CA0796|CaO19.1607	ORF|Uncharacterized	Putative transporter of divalent cations; hyphal-induced expression; fungal-specific (no human or murine homolog)	L507L	C1520T	orf19.1607-P	2	NOISE
Ca21chr3_C_albicans_SC5314	519020	C	T	131	0	48	7	orf19.1607	ALR1	orf19.9175|IPF13562.2|IPF14418.3|Contig4-2034_0002|Contig4-2034_0003|Contig4-2034_0004|Contig4-2260_0010|orf6.1088|orf6.1933|CA0796|CaO19.1607	ORF|Uncharacterized	Putative transporter of divalent cations; hyphal-induced expression; fungal-specific (no human or murine homolog)	N499N	C1496T	orf19.1607-P	2	NOISE
Ca21chr3_C_albicans_SC5314	523539	T	C	21	33	7	32								UPSTREAM:orf19.1606-P	2	NOISE
Ca21chr3_C_albicans_SC5314	523544	G	A	21	32	5	29								UPSTREAM:orf19.1606-P	2	NOISE
Ca21chr3_C_albicans_SC5314	589921	T	A	82	56	16	37								UPSTREAM:orf19.264-P	2	NOISE
Ca21chr3_C_albicans_SC5314	589927	T	C	75	60	15	37								UPSTREAM:orf19.264-P	2	NOISE
Ca21chr3_C_albicans_SC5314	822717	T	C	68	120	26	66	zeta-3a			long_terminal_repeat	Long terminal repeat (LTR) associated with the transposon Tca7; degenerated copy near Chromosome 3 centromere			UPSTREAM:orf19.2813-P	2	NOISE
Ca21chr3_C_albicans_SC5314	822883	C	T	82	193	52	107								UPSTREAM:orf19.2813-P	2	NOISE
Ca21chr3_C_albicans_SC5314	1013932	T	G	105	2	40	9	orf19.5938	SEN1	orf19.13359|IPF21262.1|IPF110.1|Contig4-3022_0012|Contig4-3022_0013|Contig4-3022_0015|orf6.9099|CA6114|CaO19.13359|CaO19.5938	ORF|Uncharacterized	Putative helicase; decreased expression in response to prostaglandins	L355R	T1063G	orf19.5938-P	2	NOISE
Ca21chr3_C_albicans_SC5314	1014876	T	G	142	1	49	10	orf19.5938	SEN1	orf19.13359|IPF21262.1|IPF110.1|Contig4-3022_0012|Contig4-3022_0013|Contig4-3022_0015|orf6.9099|CA6114|CaO19.13359|CaO19.5938	ORF|Uncharacterized	Putative helicase; decreased expression in response to prostaglandins	N40K	T119G	orf19.5938-P	2	NOISE
Ca21chr3_C_albicans_SC5314	1152758	T	C	165	0	67	8	orf19.6001	SAP3	orf19.13422|IPF21229.1|IPF8313.1|Contig4-1997_0001|orf6.9036|CA6065|CaO19.6001|CaO19.13422	ORF|Verified	Secreted aspartyl proteinase, acts in utilization of protein as nitrogen source; assessment of virulence role complicated by URA3 effects; regulated by growth phase; produced by opaque phase cells; alpha-pheromone repressed	*334R	T999C	orf19.6001-P	2	NOISE
Ca21chr3_C_albicans_SC5314	1152765	A	G	164	0	68	8	orf19.6001	SAP3	orf19.13422|IPF21229.1|IPF8313.1|Contig4-1997_0001|orf6.9036|CA6065|CaO19.6001|CaO19.13422	ORF|Verified	Secreted aspartyl proteinase, acts in utilization of protein as nitrogen source; assessment of virulence role complicated by URA3 effects; regulated by growth phase; produced by opaque phase cells; alpha-pheromone repressed	Y336C	A1006G	orf19.6001-P	2	NOISE
Ca21chr3_C_albicans_SC5314	1202124	T	G	124	4	31	6	orf19.6979		IPF3003.1|Contig4-2646_0008|Contig4-2646_0009|orf6.7725|CA5025|CaO19.6979|AMI3	ORF|Uncharacterized	S. cerevisiae ortholog MAM3 has role in mitochondrion organization, cellular manganese ion homeostasis and localizes to fungal-type vacuole membrane	W92G	T273G	orf19.6979-P	2	NOISE
Ca21chr3_C_albicans_SC5314	1202129	T	G	116	3	27	5	orf19.6979		IPF3003.1|Contig4-2646_0008|Contig4-2646_0009|orf6.7725|CA5025|CaO19.6979|AMI3	ORF|Uncharacterized	S. cerevisiae ortholog MAM3 has role in mitochondrion organization, cellular manganese ion homeostasis and localizes to fungal-type vacuole membrane	G93G	T278G	orf19.6979-P	2	NOISE
Ca21chr3_C_albicans_SC5314	1301071	T	C	156	0	48	8	orf19.7362	SKN1	orf6.8522|IPF1245.1|SKN1.3|Contig4-2926_0022|Contig4-2926_0023|CA5660|SKN1.3f	ORF|Uncharacterized	Protein with predicted role in beta-1,6-glucan synthesis; probable N-glycosylated type II membrane protein; transcription and change in mRNA length induced by yeast-hyphal transition; transcription induced by Rim101p or caspofungin	L506L	T1515C	orf19.7362-P	2	NOISE
Ca21chr3_C_albicans_SC5314	1301433	A	G	164	0	65	8	orf19.7362	SKN1	orf6.8522|IPF1245.1|SKN1.3|Contig4-2926_0022|Contig4-2926_0023|CA5660|SKN1.3f	ORF|Uncharacterized	Protein with predicted role in beta-1,6-glucan synthesis; probable N-glycosylated type II membrane protein; transcription and change in mRNA length induced by yeast-hyphal transition; transcription induced by Rim101p or caspofungin	K385R	A1153G	orf19.7362-P	2	NOISE
Ca21chr3_C_albicans_SC5314	1469672	A	G	68	0	36	7	tH(GUG)3			tRNA|Uncharacterized	tRNA-His predicted by tRNAscan-SE			UPSTREAM:orf19.7436-P	2	NOISE
Ca21chr3_C_albicans_SC5314	1469717	A	C	103	0	45	6								UPSTREAM:orf19.7436-P	2	NOISE
Ca21chr3_C_albicans_SC5314	1742360	C	T	125	6	50	7	orf19.6724	FUM12	orf19.14016|orf19.14017|orf6.6873|FUM12.3|IPF20395.1|IPF3640.2|IPF20327.1|IPF18225.1|IPF20416.1|IPF3641.2|orf6.6874|CA4349|CA4350|CA4351|orf19.6724.1|orf19.6725|FUM1|CaO19.14016|CaO19.6724|FUM12.5f	ORF|Uncharacterized	Putative fumarate hydratase, enzyme of citric acid cycle; fluconazole-downregulated; downregulated by Efg1p; transcriptionally regulated by iron; expression greater in high iron; protein present in exponential and stationary growth phase	F306F	C917T	orf19.6724-P	2	NOISE
Ca21chr3_C_albicans_SC5314	1742361	A	C	125	7	50	7	orf19.6724	FUM12	orf19.14016|orf19.14017|orf6.6873|FUM12.3|IPF20395.1|IPF3640.2|IPF20327.1|IPF18225.1|IPF20416.1|IPF3641.2|orf6.6874|CA4349|CA4350|CA4351|orf19.6724.1|orf19.6725|FUM1|CaO19.14016|CaO19.6724|FUM12.5f	ORF|Uncharacterized	Putative fumarate hydratase, enzyme of citric acid cycle; fluconazole-downregulated; downregulated by Efg1p; transcriptionally regulated by iron; expression greater in high iron; protein present in exponential and stationary growth phase	*306S	A916C	orf19.6724-P	2	NOISE
Ca21chr3_C_albicans_SC5314	1795967	A	G	225	17	156	47	orf19.6192		IPF19977.1|Contig4-2081_0001|orf6.5413|CA3211|CaO19.6192|IPF19977	ORF|Dubious	Predicted ORF in Assemblies 19, 20 and 21; Plc1p-regulated; transcription detected in high-resolution tiling array experiments	I118V	A351G	orf19.6192-P	2	NOISE
Ca21chr3_C_albicans_SC5314	1795969	C	T	225	19	157	47	orf19.6192		IPF19977.1|Contig4-2081_0001|orf6.5413|CA3211|CaO19.6192|IPF19977	ORF|Dubious	Predicted ORF in Assemblies 19, 20 and 21; Plc1p-regulated; transcription detected in high-resolution tiling array experiments	P117S	C349T	orf19.6192-P	2	NOISE
Ca21chr4_C_albicans_SC5314	23290	A	G	80	79	20	83	orf19.5639	HIS4	orf19.13084|IPF21508.1|IPF12359.2|Contig4-2558_0003|orf6.4508|CA2559|CaO19.13084|CaO19.5639	ORF|Verified	Multifunctional enzyme that catalyzes three steps of histidine biosynthesis, with phosphoribosyl-AMP cyclohydrolase, phosphoribosyl-ATP diphosphatase, and histidinol dehydrogenase activities; required for wild-type adhesion to human calls	*135*	A404G	orf19.5639-P	2	NOISE
Ca21chr4_C_albicans_SC5314	23429	A	G	70	66	23	76	orf19.5639	HIS4	orf19.13084|IPF21508.1|IPF12359.2|Contig4-2558_0003|orf6.4508|CA2559|CaO19.13084|CaO19.5639	ORF|Verified	Multifunctional enzyme that catalyzes three steps of histidine biosynthesis, with phosphoribosyl-AMP cyclohydrolase, phosphoribosyl-ATP diphosphatase, and histidinol dehydrogenase activities; required for wild-type adhesion to human calls	*89*	A265G	orf19.5639-P	2	NOISE
Ca21chr4_C_albicans_SC5314	26301	G	A	66	58	34	83	orf19.5641	CAR2	orf19.13086|IPF21531.1|IPF12355.2|Contig4-2558_0006|orf6.4510|CaO19.5641|CaO19.13086|CA2561	ORF|Verified	Ornithine aminotransferase; role in arginine metabolism; alkaline upregulated; mutation confers hypersensitivity to toxic ergosterol analog and to amphotericin B; present in exponential and stationary phase yeast cultures; biofilm-induced	V296M	G885A	orf19.5641-P	2	NOISE
Ca21chr4_C_albicans_SC5314	26310	C	G	68	53	37	93	orf19.5641	CAR2	orf19.13086|IPF21531.1|IPF12355.2|Contig4-2558_0006|orf6.4510|CaO19.5641|CaO19.13086|CA2561	ORF|Verified	Ornithine aminotransferase; role in arginine metabolism; alkaline upregulated; mutation confers hypersensitivity to toxic ergosterol analog and to amphotericin B; present in exponential and stationary phase yeast cultures; biofilm-induced	Q293E	C876G	orf19.5641-P	2	NOISE
Ca21chr4_C_albicans_SC5314	41565	C	T	50	47	8	25								UPSTREAM:orf19.5654-P	2	NOISE
Ca21chr4_C_albicans_SC5314	41600	G	A	58	48	7	30								UPSTREAM:orf19.5654-P	2	NOISE
Ca21chr4_C_albicans_SC5314	48140	C	G	84	55	20	53								UPSTREAM:orf19.5657-P	2	NOISE
Ca21chr4_C_albicans_SC5314	48284	A	G	69	48	9	28								UPSTREAM:orf19.5657-P	2	NOISE
Ca21chr4_C_albicans_SC5314	66988	C	T	71	81	25	63								UPSTREAM:orf19.5671-P	2	NOISE
Ca21chr4_C_albicans_SC5314	69494	G	A	61	48	8	30								UPSTREAM:orf19.5671-P	2	NOISE
Ca21chr4_C_albicans_SC5314	69852	G	A	72	79	26	79	orf19.5673	OPT7	orf19.13118|IPF21514.1|IPF12736.2|Contig4-2948_0004|orf6.6913|OPT3|CA4380|CaO19.5673|CaO19.13118|IPF12736	ORF|Uncharacterized	Putative oligopeptide transporter; possibly transports GSH or related compounds; induced by biofilm formation; Hog1p-induced; expression of OPT6, -7, or -8 does not suppress defect of mutant lacking OPT1-3; fungal-specific; Hap43p-repressed	R633Q	G1897A	orf19.5673-P	2	NOISE
Ca21chr4_C_albicans_SC5314	69941	A	G	74	76	28	77	orf19.5673	OPT7	orf19.13118|IPF21514.1|IPF12736.2|Contig4-2948_0004|orf6.6913|OPT3|CA4380|CaO19.5673|CaO19.13118|IPF12736	ORF|Uncharacterized	Putative oligopeptide transporter; possibly transports GSH or related compounds; induced by biofilm formation; Hog1p-induced; expression of OPT6, -7, or -8 does not suppress defect of mutant lacking OPT1-3; fungal-specific; Hap43p-repressed	K603K	A1808G	orf19.5673-P	2	NOISE
Ca21chr4_C_albicans_SC5314	91709	T	A	86	79	6	34	orf19.4189		orf19.11666|IPF23094.1|IPF8000.2|Contig4-2846_0004|orf6.3646|CA1939|CaO19.4189|CaO19.11666|IPF8000	ORF|Uncharacterized		S259S	T776A	orf19.4189-P	2	NOISE
Ca21chr4_C_albicans_SC5314	91973	C	T	78	96	15	62	orf19.4189		orf19.11666|IPF23094.1|IPF8000.2|Contig4-2846_0004|orf6.3646|CA1939|CaO19.4189|CaO19.11666|IPF8000	ORF|Uncharacterized		F171F	C512T	orf19.4189-P	2	NOISE
Ca21chr4_C_albicans_SC5314	94630	C	A	127	8	26	6	orf19.4188	NMD5	orf19.11665|IPF23113.1|IPF8002.2|Contig4-2846_0007|orf6.3645|CA1938|CaO19.4188|CaO19.11665	ORF|Uncharacterized	Protein not essential for viability; similar to S. cerevisiae Nmd5p, which is involved in protein-nucleus import; downregulated during core stress response; Hap43p-induced gene	S718Y	C2152A	orf19.4188-P	2	NOISE
Ca21chr4_C_albicans_SC5314	95754	T	C	78	68	19	46	orf19.4188	NMD5	orf19.11665|IPF23113.1|IPF8002.2|Contig4-2846_0007|orf6.3645|CA1938|CaO19.4188|CaO19.11665	ORF|Uncharacterized	Protein not essential for viability; similar to S. cerevisiae Nmd5p, which is involved in protein-nucleus import; downregulated during core stress response; Hap43p-induced gene	S343S	T1028C	orf19.4188-P	2	NOISE
Ca21chr4_C_albicans_SC5314	97612	C	T	80	70	8	75	orf19.4187		orf19.11664|IPF23092.1|IPF8006.2|Contig4-2846_0008|orf6.3644|CA1937|MMM1|CaO19.4187|CaO19.11664	ORF|Uncharacterized	S. cerevisiae ortholog MMM1 has role in phospholipid transport, mitochondrial genome maintenance, protein import into mitochondrial outer membrane and localizes to integral to endoplasmic reticulum membrane, ERMES complex	L428F	C1281T	orf19.4187-P	2	NOISE
Ca21chr4_C_albicans_SC5314	98129	C	T	61	75	24	59	orf19.4187		orf19.11664|IPF23092.1|IPF8006.2|Contig4-2846_0008|orf6.3644|CA1937|MMM1|CaO19.4187|CaO19.11664	ORF|Uncharacterized	S. cerevisiae ortholog MMM1 has role in phospholipid transport, mitochondrial genome maintenance, protein import into mitochondrial outer membrane and localizes to integral to endoplasmic reticulum membrane, ERMES complex	F255F	C764T	orf19.4187-P	2	NOISE
Ca21chr4_C_albicans_SC5314	99791	G	A	79	80	25	57	orf19.4186	PCT1	orf19.11663|IPF23090.1|IPF8007.2|Contig4-2846_0009|orf6.3643|CA1936|CaO19.4186|CaO19.11663	ORF|Verified	Putative choline-phosphate cytidylyl transferase, antigenic during human oral infection	T238T	G713A	orf19.4186-P	2	NOISE
Ca21chr4_C_albicans_SC5314	100073	T	C	82	87	23	82	orf19.4186	PCT1	orf19.11663|IPF23090.1|IPF8007.2|Contig4-2846_0009|orf6.3643|CA1936|CaO19.4186|CaO19.11663	ORF|Verified	Putative choline-phosphate cytidylyl transferase, antigenic during human oral infection	N144N	T431C	orf19.4186-P	2	NOISE
Ca21chr4_C_albicans_SC5314	108935	G	A	86	61	12	64								UPSTREAM:orf19.4181-P	2	NOISE
Ca21chr4_C_albicans_SC5314	108952	T	G	86	57	13	65								UPSTREAM:orf19.4181-P	2	NOISE
Ca21chr4_C_albicans_SC5314	118403	T	A	97	4	37	7	orf19.4173		orf19.11649|IPF16546.1|IPF23088.1|IPF6183.2|Contig4-2948_0015|orf6.814|orf6.6067|CA3723|orf19.1174|CaO19.11649|DPH2|CaO19.4173	ORF|Uncharacterized	S. cerevisiae ortholog DPH2 has role in peptidyl-diphthamide biosynthetic process from peptidyl-histidine and localizes to cytoplasm	I257I	T770A	orf19.4173-P	2	NOISE
Ca21chr4_C_albicans_SC5314	118423	C	T	107	1	41	9	orf19.4173		orf19.11649|IPF16546.1|IPF23088.1|IPF6183.2|Contig4-2948_0015|orf6.814|orf6.6067|CA3723|orf19.1174|CaO19.11649|DPH2|CaO19.4173	ORF|Uncharacterized	S. cerevisiae ortholog DPH2 has role in peptidyl-diphthamide biosynthetic process from peptidyl-histidine and localizes to cytoplasm	Q251*	C750T	orf19.4173-P	2	NOISE
Ca21chr4_C_albicans_SC5314	132017	G	A	71	71	35	84	orf19.4166	ZCF21	orf19.11642|IPF6203.2|IPF28502.1|Contig4-2878_0017|orf6.6060|CA3716|CaO19.11642|CaO19.4166|IPF6203	ORF|Uncharacterized	Predicted zinc-finger protein; possibly an essential gene, disruptants not obtained by UAU1 method	P25P	G74A	orf19.4166-P	2	NOISE
Ca21chr4_C_albicans_SC5314	132619	C	T	74	63	24	80	orf19.4166	ZCF21	orf19.11642|IPF6203.2|IPF28502.1|Contig4-2878_0017|orf6.6060|CA3716|CaO19.11642|CaO19.4166|IPF6203	ORF|Uncharacterized	Predicted zinc-finger protein; possibly an essential gene, disruptants not obtained by UAU1 method	T226I	C676T	orf19.4166-P	2	NOISE
Ca21chr4_C_albicans_SC5314	158922	T	C	58	65	18	57								UPSTREAM:orf19.4704-P	2	NOISE
Ca21chr4_C_albicans_SC5314	159127	T	C	53	52	13	35								UPSTREAM:orf19.4704-P	2	NOISE
Ca21chr4_C_albicans_SC5314	192198	T	G	74	67	12	42	orf19.4691		orf19.12160|IPF17417.2|IPF11193.2|Contig4-2496_0004|orf6.1057|orf6.1708|CA0282|CaO19.4691|IPF17417	ORF|Uncharacterized		F199V	T594G	orf19.4691-P	2	NOISE
Ca21chr4_C_albicans_SC5314	192463	G	A	73	74	23	66	orf19.4691		orf19.12160|IPF17417.2|IPF11193.2|Contig4-2496_0004|orf6.1057|orf6.1708|CA0282|CaO19.4691|IPF17417	ORF|Uncharacterized		R110R	G329A	orf19.4691-P	2	NOISE
Ca21chr4_C_albicans_SC5314	208808	G	A	63	70	25	71								UPSTREAM:orf19.4684.2-P	2	NOISE
Ca21chr4_C_albicans_SC5314	208835	A	G	77	62	23	65								UPSTREAM:orf19.4684.2-P	2	NOISE
Ca21chr4_C_albicans_SC5314	221131	A	G	90	88	27	66	orf19.4681	RAT1	orf19.12150|IPF22542.1|IPF7491.1|Contig4-2949_0009|Contig4-2949_0010|orf6.5455|CA3242|CaO19.12150|CaO19.4681	ORF|Verified	5'-->3' exoribonuclease; similar to S. cerevisiae nuclear exoribonuclease Rat1p; suppresses S. cerevisiae kem1 mutant slow growth, mating defect, and haploid invasive growth defect	Y557C	A1669G	orf19.4681-P	2	NOISE
Ca21chr4_C_albicans_SC5314	221979	C	T	75	79	23	64	orf19.4681	RAT1	orf19.12150|IPF22542.1|IPF7491.1|Contig4-2949_0009|Contig4-2949_0010|orf6.5455|CA3242|CaO19.12150|CaO19.4681	ORF|Verified	5'-->3' exoribonuclease; similar to S. cerevisiae nuclear exoribonuclease Rat1p; suppresses S. cerevisiae kem1 mutant slow growth, mating defect, and haploid invasive growth defect	L840L	C2517T	orf19.4681-P	2	NOISE
Ca21chr4_C_albicans_SC5314	222642	C	T	88	83	11	36	orf19.4680		orf19.12149|IPF22604.1|IPF7489.2|Contig4-2949_0008|orf6.5456|CA3243|DGK1|CaO19.12149|CaO19.4680|IPF7489	ORF|Verified	Possile protease; mutation confers hypersensitivity to toxic ergosterol analog	N306N	C917T	orf19.4680-P	2	NOISE
Ca21chr4_C_albicans_SC5314	223140	C	A	77	87	20	65	orf19.4680		orf19.12149|IPF22604.1|IPF7489.2|Contig4-2949_0008|orf6.5456|CA3243|DGK1|CaO19.12149|CaO19.4680|IPF7489	ORF|Verified	Possile protease; mutation confers hypersensitivity to toxic ergosterol analog	P140P	C419A	orf19.4680-P	2	NOISE
Ca21chr4_C_albicans_SC5314	223584	G	A	79	59	9	32								UPSTREAM:orf19.4680-P	2	NOISE
Ca21chr4_C_albicans_SC5314	223634	A	G	66	56	8	28								UPSTREAM:orf19.4680-P	2	NOISE
Ca21chr4_C_albicans_SC5314	227748	G	A	67	58	10	38								UPSTREAM:orf19.4679-P	2	NOISE
Ca21chr4_C_albicans_SC5314	227811	T	C	77	54	19	48	tD(GUC)6		tD(GUC)6.2	tRNA|Uncharacterized	tRNA-Asp predicted by tRNAscan-SE			UPSTREAM:orf19.4679-P	2	NOISE
Ca21chr4_C_albicans_SC5314	241572	C	T	80	80	27	88	orf19.4670	CAS5	orf19.12140|IPF22550.1|IPF7414.1|Contig4-2599_0003|orf6.4066|CA2243|CaO19.12140|CaO19.4670|IPF7414	ORF|Verified	Putative zinc finger transcription factor; cell wall damage response; required for wild-type transcriptional response to caspofungin; mutant caspofungin hypersensitive; downregulated in core stress response; avirulent, reduced CFU in mice	A56A	C167T	orf19.4670-P	2	NOISE
Ca21chr4_C_albicans_SC5314	243750	T	C	77	64	12	57	orf19.4670	CAS5	orf19.12140|IPF22550.1|IPF7414.1|Contig4-2599_0003|orf6.4066|CA2243|CaO19.12140|CaO19.4670|IPF7414	ORF|Verified	Putative zinc finger transcription factor; cell wall damage response; required for wild-type transcriptional response to caspofungin; mutant caspofungin hypersensitive; downregulated in core stress response; avirulent, reduced CFU in mice	N782N	T2345C	orf19.4670-P	2	NOISE
Ca21chr4_C_albicans_SC5314	251069	C	T	66	70	14	34	orf19.4664	NAT4	orf19.12134|IPF22668.1|IPF7403.2|Contig4-2819_0011|orf6.4072|orf6.4715|CA2710|CaO19.4664|IPF7403	ORF|Verified	Putative histone acetyltransferase, involved in regulation of white-opaque switching; early-stage biofilm-induced gene	F40F	C119T	orf19.4664-P	2	NOISE
Ca21chr4_C_albicans_SC5314	251312	T	C	65	79	16	58	orf19.4664	NAT4	orf19.12134|IPF22668.1|IPF7403.2|Contig4-2819_0011|orf6.4072|orf6.4715|CA2710|CaO19.4664|IPF7403	ORF|Verified	Putative histone acetyltransferase, involved in regulation of white-opaque switching; early-stage biofilm-induced gene	Y121Y	T362C	orf19.4664-P	2	NOISE
Ca21chr4_C_albicans_SC5314	265801	T	A	73	85	18	81								UPSTREAM:orf19.4656-P	2	NOISE
Ca21chr4_C_albicans_SC5314	265970	C	T	76	46	19	60								UPSTREAM:orf19.4656-P	2	NOISE
Ca21chr4_C_albicans_SC5314	273398	G	A	101	67	21	69	orf19.4653		orf19.12123|orf4.4704|IPF22681.1|IPF12189.1|Contig4-2565_0007|orf6.4704|CaO19.4653|CaO19.12123	ORF|Uncharacterized	Transcriptionally regulated by iron; expression greater in low iron; similar to GPI-linked cell-wall proteins	A35T	G102A	orf19.4653-P	2	NOISE
Ca21chr4_C_albicans_SC5314	273498	C	T	78	58	35	94	orf19.4653		orf19.12123|orf4.4704|IPF22681.1|IPF12189.1|Contig4-2565_0007|orf6.4704|CaO19.4653|CaO19.12123	ORF|Uncharacterized	Transcriptionally regulated by iron; expression greater in low iron; similar to GPI-linked cell-wall proteins	S68F	C202T	orf19.4653-P	2	NOISE
Ca21chr4_C_albicans_SC5314	274771	C	A	133	0	46	6	orf19.4652		orf19.12122|IPF12187.2|IPF28322.1|Contig4-2565_0008|orf6.4703|orf6.77|CaO19.4652	ORF|Dubious		T16N	C46A	orf19.4652-P	2	NOISE
Ca21chr4_C_albicans_SC5314	275033	A	G	43	36	16	43	orf19.4652		orf19.12122|IPF12187.2|IPF28322.1|Contig4-2565_0008|orf6.4703|orf6.77|CaO19.4652	ORF|Dubious		L103L	A308G	orf19.4652-P	2	NOISE
Ca21chr4_C_albicans_SC5314	278332	G	A	78	75	29	66	orf19.4651	PGA53	orf19.12120|IPF15581.2|IPF9303.2|Contig4-2275_0007|orf6.305|orf6.3348|CA1720|CaO19.4651|IPF15581	ORF|Verified	GPI-anchored cell surface protein of unknown function; greater mRNA abundance observed in a cyr1 homozygous null mutant than in wild type	L20L	G59A	orf19.4651-P	2	NOISE
Ca21chr4_C_albicans_SC5314	278561	T	C	65	52	20	70	orf19.4651	PGA53	orf19.12120|IPF15581.2|IPF9303.2|Contig4-2275_0007|orf6.305|orf6.3348|CA1720|CaO19.4651|IPF15581	ORF|Verified	GPI-anchored cell surface protein of unknown function; greater mRNA abundance observed in a cyr1 homozygous null mutant than in wild type	S97P	T288C	orf19.4651-P	2	NOISE
Ca21chr4_C_albicans_SC5314	308051	T	A	57	77	9	43								UPSTREAM:orf19.4639-P	2	NOISE
Ca21chr4_C_albicans_SC5314	308070	C	A	55	72	11	42								UPSTREAM:orf19.4639-P	2	NOISE
Ca21chr4_C_albicans_SC5314	313716	G	A	66	70	20	71	orf19.4634		orf19.12104|IPF22600.1|IPF8996.2|Contig4-2825_0012|orf6.1840|CA0734|CaO19.4634|CaO19.12104|IPF8996	ORF|Uncharacterized	S. cerevisiae ortholog NCS6 has role in protein urmylation, tRNA wobble position uridine thiolation and localizes to mitochondrion	S223S	G668A	orf19.4634-P	2	NOISE
Ca21chr4_C_albicans_SC5314	314048	A	G	76	65	19	55	orf19.4634		orf19.12104|IPF22600.1|IPF8996.2|Contig4-2825_0012|orf6.1840|CA0734|CaO19.4634|CaO19.12104|IPF8996	ORF|Uncharacterized	S. cerevisiae ortholog NCS6 has role in protein urmylation, tRNA wobble position uridine thiolation and localizes to mitochondrion	Q334R	A1000G	orf19.4634-P	2	NOISE
Ca21chr4_C_albicans_SC5314	334360	A	G	69	76	15	56								UPSTREAM:orf19.4625-P	2	NOISE
Ca21chr4_C_albicans_SC5314	334425	T	C	70	60	11	39								UPSTREAM:orf19.4625-P	2	NOISE
Ca21chr4_C_albicans_SC5314	345200	T	G	69	53	7	46								UPSTREAM:orf19.4621-P	2	NOISE
Ca21chr4_C_albicans_SC5314	345236	G	A	51	45	8	40								UPSTREAM:orf19.4621-P	2	NOISE
Ca21chr4_C_albicans_SC5314	349252	G	A	62	75	12	53	orf19.4616	POL30	orf19.12086|IPF22623.1|IPF20027.1|orf6.7915|CA5178|CaO19.4616	ORF|Uncharacterized	Similar to proliferating cell nuclear antigen (PCNA); RNA abundance regulated by tyrosol and cell density; transcriptionally induced by interaction with macrophages; flucytosine induced; stationary phase enriched protein	E32E	G95A	orf19.4616-P	2	NOISE
Ca21chr4_C_albicans_SC5314	349654	T	C	65	71	19	70	orf19.4616	POL30	orf19.12086|IPF22623.1|IPF20027.1|orf6.7915|CA5178|CaO19.4616	ORF|Uncharacterized	Similar to proliferating cell nuclear antigen (PCNA); RNA abundance regulated by tyrosol and cell density; transcriptionally induced by interaction with macrophages; flucytosine induced; stationary phase enriched protein	S166S	T497C	orf19.4616-P	2	NOISE
Ca21chr4_C_albicans_SC5314	411956	T	G	126	5	43	12	orf19.4585	TFG1	orf19.12054|IPF22571.1|IPF1015.1|Contig4-3104_0035|Contig4-3104_0037|orf6.7884|CA5148|CaO19.12054|CaO19.4585	ORF|Verified	Protein similar to S. cerevisiae Tfg1p, which is part of transcription factor TFIIF; transposon mutation affects filamentous growth; possibly an essential gene, disruptants not obtained by UAU1 method	V563G	T1687G	orf19.4585-P	2	NOISE
Ca21chr4_C_albicans_SC5314	413353	T	C	70	63	19	58	orf19.4585	TFG1	orf19.12054|IPF22571.1|IPF1015.1|Contig4-3104_0035|Contig4-3104_0037|orf6.7884|CA5148|CaO19.12054|CaO19.4585	ORF|Verified	Protein similar to S. cerevisiae Tfg1p, which is part of transcription factor TFIIF; transposon mutation affects filamentous growth; possibly an essential gene, disruptants not obtained by UAU1 method	H97H	T290C	orf19.4585-P	2	NOISE
Ca21chr4_C_albicans_SC5314	437094	G	A	79	72	13	38								UPSTREAM:orf19.4571-P	2	NOISE
Ca21chr4_C_albicans_SC5314	437095	C	T	77	72	13	38								UPSTREAM:orf19.4571-P	2	NOISE
Ca21chr4_C_albicans_SC5314	437774	T	A	69	64	22	61								UPSTREAM:orf19.4570-P	2	NOISE
Ca21chr4_C_albicans_SC5314	437808	A	G	75	73	20	79								UPSTREAM:orf19.4570-P	2	NOISE
Ca21chr4_C_albicans_SC5314	469312	G	A	74	64	6	44								UPSTREAM:orf19.2770-P	2	NOISE
Ca21chr4_C_albicans_SC5314	469315	C	T	76	63	7	44								UPSTREAM:orf19.2770-P	2	NOISE
Ca21chr4_C_albicans_SC5314	480046	G	A	49	48	4	24								UPSTREAM:orf19.2765-P	2	NOISE
Ca21chr4_C_albicans_SC5314	480350	T	C	68	56	11	38								UPSTREAM:orf19.2765-P	2	NOISE
Ca21chr4_C_albicans_SC5314	528740	T	C	93	79	21	48	orf19.2746		orf19.10260|IPF14444.3|IPF28996.1|Contig4-3001_0019|orf6.4702|CA2702|EMP70|CaO19.2746|IPF14444.2	ORF|Uncharacterized	S. cerevisiae ortholog EMP70 has role in invasive growth in response to glucose limitation, cellular copper ion homeostasis, pseudohyphal growth and localizes to endosome, fungal-type vacuole membrane	G216G	T647C	orf19.2746-P	2	NOISE
Ca21chr4_C_albicans_SC5314	533736	C	T	49	69	11	43								UPSTREAM:orf19.2743-P	2	NOISE
Ca21chr4_C_albicans_SC5314	534352	A	G	87	72	17	56								UPSTREAM:orf19.2743-P	2	NOISE
Ca21chr4_C_albicans_SC5314	552819	A	C	28	41	1	33	orf19.2733		orf19.10246|orf19.10247|IPF9173.2|IPF29004.1|orf6.4688|orf6.4689|CA2692|CA2693|orf19.2732|IPF9173.5f	ORF|Uncharacterized	Putative subunit of phosphatidylinositol 3-kinase complexes I and II; transcription is activated in the presence of elevated CO2	T395P	A1182C	orf19.2733-P	2	NOISE
Ca21chr4_C_albicans_SC5314	553174	A	G	62	51	14	40	orf19.2733		orf19.10246|orf19.10247|IPF9173.2|IPF29004.1|orf6.4688|orf6.4689|CA2692|CA2693|orf19.2732|IPF9173.5f	ORF|Uncharacterized	Putative subunit of phosphatidylinositol 3-kinase complexes I and II; transcription is activated in the presence of elevated CO2	N513S	A1537G	orf19.2733-P	2	NOISE
Ca21chr4_C_albicans_SC5314	584230	A	G	70	65	10	32								UPSTREAM:orf19.2717-P	2	NOISE
Ca21chr4_C_albicans_SC5314	584241	C	T	65	59	10	32								UPSTREAM:orf19.2717-P	2	NOISE
Ca21chr4_C_albicans_SC5314	597588	T	C	66	55	9	50	orf19.2708		orf19.10223|IPF24626.1|IPF14356.2|Contig4-1779_0002|orf6.1233|CA0377|CaO19.2708|IPF14356	ORF|Uncharacterized	S. cerevisiae ortholog SDO1 has role in ribosomal large subunit biogenesis, ribosomal subunit export from nucleus, rRNA processing and localizes to nucleus, preribosome, large subunit precursor, cytoplasm, polysome	N254N	T761C	orf19.2708-P	2	NOISE
Ca21chr4_C_albicans_SC5314	597705	C	A	104	63	17	50	orf19.2708		orf19.10223|IPF24626.1|IPF14356.2|Contig4-1779_0002|orf6.1233|CA0377|CaO19.2708|IPF14356	ORF|Uncharacterized	S. cerevisiae ortholog SDO1 has role in ribosomal large subunit biogenesis, ribosomal subunit export from nucleus, rRNA processing and localizes to nucleus, preribosome, large subunit precursor, cytoplasm, polysome	G215G	C644A	orf19.2708-P	2	NOISE
Ca21chr4_C_albicans_SC5314	609964	C	T	89	64	24	108	orf19.2697		orf19.10212|IPF24635.1|IPF19781.1|Contig4-2782_0001|Contig4-2809_0001|orf6.5485|CA3263|UBR2|CaO19.10212|CaO19.2697|UBR12	ORF|Uncharacterized		D164D	C491T	orf19.2697-P	2	NOISE
Ca21chr4_C_albicans_SC5314	610102	C	T	72	60	19	69	orf19.2697		orf19.10212|IPF24635.1|IPF19781.1|Contig4-2782_0001|Contig4-2809_0001|orf6.5485|CA3263|UBR2|CaO19.10212|CaO19.2697|UBR12	ORF|Uncharacterized		I210I	C629T	orf19.2697-P	2	NOISE
Ca21chr4_C_albicans_SC5314	621404	C	T	86	68	12	39								UPSTREAM:orf19.2694-P	2	NOISE
Ca21chr4_C_albicans_SC5314	621423	T	C	164	9	39	6								UPSTREAM:orf19.2694-P	2	NOISE
Ca21chr4_C_albicans_SC5314	622253	G	T	60	36	19	62	orf19.2694	TYS1	orf19.10209|IPF24614.1|IPF5023.2|Contig4-2782_0005|Contig4-2865_0013|orf6.5482|CA3261|CaO19.2694|CaO19.10209	ORF|Uncharacterized	Putative tRNA-Tyr synthetase; genes encoding ribosomal subunits, translation factors, and tRNA synthetases are downregulated upon phagocytosis by murine macrophages; stationary phase enriched protein	S229S	G686T	orf19.2694-P	2	NOISE
Ca21chr4_C_albicans_SC5314	626178	A	G	87	77	18	66								UPSTREAM:orf19.2691-P	2	NOISE
Ca21chr4_C_albicans_SC5314	626389	C	T	78	63	12	32								UPSTREAM:orf19.2691-P	2	NOISE
Ca21chr4_C_albicans_SC5314	641042	C	T	91	65	9	30								UPSTREAM:orf19.2684-P	2	NOISE
Ca21chr4_C_albicans_SC5314	641704	G	A	62	34	10	44								UPSTREAM:orf19.2684-P	2	NOISE
Ca21chr4_C_albicans_SC5314	664471	A	G	77	65	20	56	orf19.2674		orf19.10189|IPF24618.1|IPF6890.2|orf6.5560|CA3325|CaO19.2674|CaO19.10189|IPF6890	ORF|Uncharacterized	Putative transcription factor with zinc finger DNA-binding motif; Hap43p-repressed gene	K223K	A668G	orf19.2674-P	2	NOISE
Ca21chr4_C_albicans_SC5314	664651	T	C	46	57	12	63	orf19.2674		orf19.10189|IPF24618.1|IPF6890.2|orf6.5560|CA3325|CaO19.2674|CaO19.10189|IPF6890	ORF|Uncharacterized	Putative transcription factor with zinc finger DNA-binding motif; Hap43p-repressed gene	P163P	T488C	orf19.2674-P	2	NOISE
Ca21chr4_C_albicans_SC5314	678838	T	C	13	58	0	47	Tca4-4;orf19.2668.1		TCA4;IPF12159.2|CA3331|POL21.53f|POL.3	retrotransposon;blocked_reading_frame|transposable element gene	Retrotransposon Tca4 on Chromosome 4, about 6.9 kbp member of the copia group with two ORFs similar to gag and pol, flanked by 381-bp LTRs (san elements);Region in retrotransposon Tca4 annotated in Assembly 21 as a blocked reading frame, based on comparative genome analysis; overlaps orf19.2668, which is an open reading frame similar to Gag proteins of retrotransposons			UPSTREAM:orf19.2669-P	2	NOISE
Ca21chr4_C_albicans_SC5314	678840	A	T	13	57	0	47	Tca4-4;orf19.2668.1		TCA4;IPF12159.2|CA3331|POL21.53f|POL.3	retrotransposon;blocked_reading_frame|transposable element gene	Retrotransposon Tca4 on Chromosome 4, about 6.9 kbp member of the copia group with two ORFs similar to gag and pol, flanked by 381-bp LTRs (san elements);Region in retrotransposon Tca4 annotated in Assembly 21 as a blocked reading frame, based on comparative genome analysis; overlaps orf19.2668, which is an open reading frame similar to Gag proteins of retrotransposons			UPSTREAM:orf19.2669-P	2	NOISE
Ca21chr4_C_albicans_SC5314	683292	G	A	104	78	23	64	orf19.2665	MSN5	orf19.10182|orf19.10183|IPF18929.1|IPF24579.1|IPF29005.1|IPF12426.2|Contig4-3083_0029|orf6.1628|orf6.1629|CA0601|CA0600|orf19.2666|MSN5.3f	ORF|Uncharacterized	S. cerevisiae ortholog MSN5 has importin-alpha export receptor activity, has role in tRNA re-export from nucleus, protein export from nucleus and localizes to nucleus	E231E	G692A	orf19.2665-P	2	NOISE
Ca21chr4_C_albicans_SC5314	683916	T	A	67	76	19	64	orf19.2665	MSN5	orf19.10182|orf19.10183|IPF18929.1|IPF24579.1|IPF29005.1|IPF12426.2|Contig4-3083_0029|orf6.1628|orf6.1629|CA0601|CA0600|orf19.2666|MSN5.3f	ORF|Uncharacterized	S. cerevisiae ortholog MSN5 has importin-alpha export receptor activity, has role in tRNA re-export from nucleus, protein export from nucleus and localizes to nucleus	L439L	T1316A	orf19.2665-P	2	NOISE
Ca21chr4_C_albicans_SC5314	711947	T	C	68	65	23	54	orf19.3366.1		IPF23888.1|IPF10397.2|CA0701|IPF10397	ORF|Uncharacterized	Hap43p-repressed gene	A57A	T170C	orf19.3366.1-P	2	NOISE
Ca21chr4_C_albicans_SC5314	711965	T	A	62	70	25	51	orf19.3366.1		IPF23888.1|IPF10397.2|CA0701|IPF10397	ORF|Uncharacterized	Hap43p-repressed gene	P63P	T188A	orf19.3366.1-P	2	NOISE
Ca21chr4_C_albicans_SC5314	752965	C	G	76	59	25	63								UPSTREAM:orf19.1324-P	2	NOISE
Ca21chr4_C_albicans_SC5314	755354	G	A	83	84	11	31								UPSTREAM:orf19.1324-P	2	NOISE
Ca21chr4_C_albicans_SC5314	778940	A	T	81	81	27	65								UPSTREAM:orf19.1311-P	2	NOISE
Ca21chr4_C_albicans_SC5314	780172	T	C	80	82	20	57								UPSTREAM:orf19.1311-P	2	NOISE
Ca21chr4_C_albicans_SC5314	802167	G	A	83	85	22	76								UPSTREAM:orf19.1300-P	2	NOISE
Ca21chr4_C_albicans_SC5314	802194	T	C	77	66	27	62								UPSTREAM:orf19.1300-P	2	NOISE
Ca21chr4_C_albicans_SC5314	809968	G	A	49	71	9	49	orf19.5037	HRQ2	orf19.12504|IPF17054|IPF22188.1|IPF17054.2|orf6.3314|CA1693|CaO19.12504|CaO19.5037	ORF|Uncharacterized	Protein not essential for viability	G332G	G995A	orf19.5037-P	2	NOISE
Ca21chr4_C_albicans_SC5314	810349	C	T	82	68	10	36	orf19.5037	HRQ2	orf19.12504|IPF17054|IPF22188.1|IPF17054.2|orf6.3314|CA1693|CaO19.12504|CaO19.5037	ORF|Uncharacterized	Protein not essential for viability	I205I	C614T	orf19.5037-P	2	NOISE
Ca21chr4_C_albicans_SC5314	822056	T	C	90	67	12	38								UPSTREAM:orf19.5043-P	2	NOISE
Ca21chr4_C_albicans_SC5314	822216	T	C	89	98	20	68								UPSTREAM:orf19.5043-P	2	NOISE
Ca21chr4_C_albicans_SC5314	822334	T	C	94	79	14	59	orf19.5043		orf19.12510|IPF17702.3|IPF16758.1|Contig4-1448_0002|Contig4-2272_0007|Contig4-2272_0008|orf6.3320|orf6.429|CA1697|CaO19.5043|IPF16758	ORF|Uncharacterized		D32D	T95C	orf19.5043-P	2	NOISE
Ca21chr4_C_albicans_SC5314	822502	A	G	88	76	12	61	orf19.5043		orf19.12510|IPF17702.3|IPF16758.1|Contig4-1448_0002|Contig4-2272_0007|Contig4-2272_0008|orf6.3320|orf6.429|CA1697|CaO19.5043|IPF16758	ORF|Uncharacterized		T88T	A263G	orf19.5043-P	2	NOISE
Ca21chr4_C_albicans_SC5314	834808	T	C	73	71	7	46								UPSTREAM:orf19.1595-P	2	NOISE
Ca21chr4_C_albicans_SC5314	834845	A	G	75	66	13	39								UPSTREAM:orf19.1595-P	2	NOISE
Ca21chr4_C_albicans_SC5314	839090	T	G	148	1	45	6	orf19.789	PYC2	orf19.8408|orf6.2989|IPF26382.1|IPF26504.1|IPF15163.2|IPF15167.2|Contig4-3027_0007|CA1464|PYC2.3f|PYC2.exon2	ORF|Uncharacterized	Putative pyruvate carboxylase, binds to biotin cofactor; up-regulated in mutant lacking the Ssk1p response regulator protein, upon benomyl treatment, or in an azole-resistant strain overexpressing MDR1; stationary phase enriched protein	N750K	T2249G	orf19.789-P	2	NOISE
Ca21chr4_C_albicans_SC5314	840760	T	G	69	83	21	61	orf19.789	PYC2	orf19.8408|orf6.2989|IPF26382.1|IPF26504.1|IPF15163.2|IPF15167.2|Contig4-3027_0007|CA1464|PYC2.3f|PYC2.exon2	ORF|Uncharacterized	Putative pyruvate carboxylase, binds to biotin cofactor; up-regulated in mutant lacking the Ssk1p response regulator protein, upon benomyl treatment, or in an azole-resistant strain overexpressing MDR1; stationary phase enriched protein	*194G	T579G	orf19.789-P	2	NOISE
Ca21chr4_C_albicans_SC5314	844858	T	C	56	47	7	47	orf19.787		orf19.8406|IPF26483.1|IPF29675.1|orf6.558|CaO19.787|CaO19.8406	ORF|Uncharacterized		S22P	T63C	orf19.787-P	2	NOISE
Ca21chr4_C_albicans_SC5314	844867	T	C	58	48	9	48	orf19.787		orf19.8406|IPF26483.1|IPF29675.1|orf6.558|CaO19.787|CaO19.8406	ORF|Uncharacterized		S19P	T54C	orf19.787-P	2	NOISE
Ca21chr4_C_albicans_SC5314	849765	A	G	141	4	42	9	RB2-4a			repeat_region	Repeat sequence RB2 on Chromosome 4 (partial); RB2 units are part of the Major Repeat Sequence (MRS) found on most chromosomes; may serve as recombination hotspots			UPSTREAM:orf19.5312-P	2	NOISE
Ca21chr4_C_albicans_SC5314	849769	T	C	135	7	43	8	RB2-4a			repeat_region	Repeat sequence RB2 on Chromosome 4 (partial); RB2 units are part of the Major Repeat Sequence (MRS) found on most chromosomes; may serve as recombination hotspots			UPSTREAM:orf19.5312-P	2	NOISE
Ca21chr4_C_albicans_SC5314	850861	T	C	88	2	46	8	RB2-4a			repeat_region	Repeat sequence RB2 on Chromosome 4 (partial); RB2 units are part of the Major Repeat Sequence (MRS) found on most chromosomes; may serve as recombination hotspots			UPSTREAM:orf19.1208-P	2	NOISE
Ca21chr4_C_albicans_SC5314	850877	T	C	76	3	41	6	RB2-4a			repeat_region	Repeat sequence RB2 on Chromosome 4 (partial); RB2 units are part of the Major Repeat Sequence (MRS) found on most chromosomes; may serve as recombination hotspots			UPSTREAM:orf19.1208-P	2	NOISE
Ca21chr4_C_albicans_SC5314	869278	G	A	65	72	4	53	orf19.5304		orf19.12764|IPF21881.1|IPF8528.1|Contig4-2961_0010|orf6.8293|CaO19.5304|CaO19.12764	ORF|Dubious		S14N	G40A	orf19.5304-P	2	NOISE
Ca21chr4_C_albicans_SC5314	869569	T	C	85	52	17	51	orf19.5304		orf19.12764|IPF21881.1|IPF8528.1|Contig4-2961_0010|orf6.8293|CaO19.5304|CaO19.12764	ORF|Dubious		V111A	T331C	orf19.5304-P	2	NOISE
Ca21chr4_C_albicans_SC5314	905117	A	G	69	56	15	55	orf19.1426		orf19.9002|IPF25901.1|IPF9375.2|orf6.6395|CA3965|CaO19.9002|CaO19.1426|IPF9375	ORF|Uncharacterized		I669M	A2006G	orf19.1426-P	2	NOISE
Ca21chr4_C_albicans_SC5314	906689	C	T	88	68	17	78	orf19.1426		orf19.9002|IPF25901.1|IPF9375.2|orf6.6395|CA3965|CaO19.9002|CaO19.1426|IPF9375	ORF|Uncharacterized		L145L	C434T	orf19.1426-P	2	NOISE
Ca21chr4_C_albicans_SC5314	908006	T	C	80	67	25	51								UPSTREAM:orf19.1426-P	2	NOISE
Ca21chr4_C_albicans_SC5314	908028	T	G	79	61	21	46								UPSTREAM:orf19.1426-P	2	NOISE
Ca21chr4_C_albicans_SC5314	937775	C	A	59	51	13	41	orf19.1409.1			ORF|Uncharacterized	S. cerevisiae ortholog RPL22B has structural constituent of ribosome, has role in translation and localizes to cytosolic large ribosomal subunit	Q91K	C270A	orf19.1409.1-P	2	NOISE
Ca21chr4_C_albicans_SC5314	937825	G	A	69	84	13	68	orf19.1409.1			ORF|Uncharacterized	S. cerevisiae ortholog RPL22B has structural constituent of ribosome, has role in translation and localizes to cytosolic large ribosomal subunit	K107K	G320A	orf19.1409.1-P	2	NOISE
Ca21chr4_C_albicans_SC5314	974773	C	T	65	52	14	73	orf19.3827		orf19.11308|IPF23465.1|IPF15950.2|Contig4-2187_0004|Contig4-2187_0006|orf6.7522|CA4856|CaO19.11308|CaO19.3827|IPF15950	ORF|Uncharacterized	S. cerevisiae ortholog OMA1 has metalloendopeptidase activity, has role in misfolded or incompletely synthesized protein catabolic process and localizes to mitochondrial inner membrane	H269H	C806T	orf19.3827-P	2	NOISE
Ca21chr4_C_albicans_SC5314	975348	C	T	152	1	56	7	orf19.3827		orf19.11308|IPF23465.1|IPF15950.2|Contig4-2187_0004|Contig4-2187_0006|orf6.7522|CA4856|CaO19.11308|CaO19.3827|IPF15950	ORF|Uncharacterized	S. cerevisiae ortholog OMA1 has metalloendopeptidase activity, has role in misfolded or incompletely synthesized protein catabolic process and localizes to mitochondrial inner membrane	Q78*	C231T	orf19.3827-P	2	NOISE
Ca21chr4_C_albicans_SC5314	979597	A	G	78	73	18	99	orf19.3825	RCE1	orf19.11306|IPF23473.1|IPF5825.1|Contig4-2989_0006|orf6.7520|CA4854|CaO19.11306|CaO19.3825	ORF|Uncharacterized	Putative Type II CAAX prenyl protease; induced during the mating process	K67E	A198G	orf19.3825-P	2	NOISE
Ca21chr4_C_albicans_SC5314	979615	A	G	93	74	16	89	orf19.3825	RCE1	orf19.11306|IPF23473.1|IPF5825.1|Contig4-2989_0006|orf6.7520|CA4854|CaO19.11306|CaO19.3825	ORF|Uncharacterized	Putative Type II CAAX prenyl protease; induced during the mating process	I73V	A216G	orf19.3825-P	2	NOISE
Ca21chr4_C_albicans_SC5314	984749	A	C	75	53	32	125	orf19.3823	ZDS1	orf19.11304|CES1|IPF23484.1|IPF5823.2|Contig4-2989_0013|orf6.7518|CA4853|IPF5823	ORF|Uncharacterized	Nonessential protein; similar to S. cerevisiae Zds1p	N816T	A2446C	orf19.3823-P	2	NOISE
Ca21chr4_C_albicans_SC5314	984756	T	C	75	49	30	124	orf19.3823	ZDS1	orf19.11304|CES1|IPF23484.1|IPF5823.2|Contig4-2989_0013|orf6.7518|CA4853|IPF5823	ORF|Uncharacterized	Nonessential protein; similar to S. cerevisiae Zds1p	N818N	T2453C	orf19.3823-P	2	NOISE
Ca21chr4_C_albicans_SC5314	1000836	G	A	90	77	27	71	orf19.3817		orf19.11298|IPF23476.1|IPF6953.1|Contig4-2979_0004|orf6.7512|CA4848|CaO19.11298|RTS2|CaO19.3817	ORF|Uncharacterized	S. cerevisiae ortholog RTS2 localizes to cytoplasm, nucleus	E77K	G228A	orf19.3817-P	2	NOISE
Ca21chr4_C_albicans_SC5314	1001162	A	G	68	59	13	57	orf19.3817		orf19.11298|IPF23476.1|IPF6953.1|Contig4-2979_0004|orf6.7512|CA4848|CaO19.11298|RTS2|CaO19.3817	ORF|Uncharacterized	S. cerevisiae ortholog RTS2 localizes to cytoplasm, nucleus	Q185Q	A554G	orf19.3817-P	2	NOISE
Ca21chr4_C_albicans_SC5314	1012519	T	C	75	54	21	98	orf19.3810		orf19.11291|IPF23466.1|IPF6938.2|Contig4-2979_0018|orf6.7505|CA4842|CaO19.3810|MTD1|CaO19.11291	ORF|Uncharacterized	S. cerevisiae ortholog MTD1 has methylenetetrahydrofolate dehydrogenase (NAD+) activity and has role in one-carbon metabolic process, purine base biosynthetic process, folic acid and derivative biosynthetic process	I246T	T736C	orf19.3810-P	2	NOISE
Ca21chr4_C_albicans_SC5314	1012535	A	G	75	56	23	84	orf19.3810		orf19.11291|IPF23466.1|IPF6938.2|Contig4-2979_0018|orf6.7505|CA4842|CaO19.3810|MTD1|CaO19.11291	ORF|Uncharacterized	S. cerevisiae ortholog MTD1 has methylenetetrahydrofolate dehydrogenase (NAD+) activity and has role in one-carbon metabolic process, purine base biosynthetic process, folic acid and derivative biosynthetic process	E251E	A752G	orf19.3810-P	2	NOISE
Ca21chr4_C_albicans_SC5314	1013240	G	C	81	62	22	90	orf19.3809	BAS1	orf19.11290|IPF23442.1|IPF10355.2|Contig4-2979_0019|orf6.1870|orf6.7504|CA4841|CaO19.11290|CaO19.3809|IPF10355|FIL1	ORF|Verified	Putative transcription factor with Myb-like DNA-binding motif; similar to S. cerevisiae Bas1p, which is a regulator of purine biosynthetic genes; null mutant exhibits adenine auxotrophy and abnormal colony morphology	G40G	G119C	orf19.3809-P	2	NOISE
Ca21chr4_C_albicans_SC5314	1013672	T	C	51	55	28	82	orf19.3809	BAS1	orf19.11290|IPF23442.1|IPF10355.2|Contig4-2979_0019|orf6.1870|orf6.7504|CA4841|CaO19.11290|CaO19.3809|IPF10355|FIL1	ORF|Verified	Putative transcription factor with Myb-like DNA-binding motif; similar to S. cerevisiae Bas1p, which is a regulator of purine biosynthetic genes; null mutant exhibits adenine auxotrophy and abnormal colony morphology	N184N	T551C	orf19.3809-P	2	NOISE
Ca21chr4_C_albicans_SC5314	1019506	T	C	65	61	14	46	orf19.3803	MNN22	orf19.11284|IPF10363.2|IPF10361.3|Contig4-2432_0003|orf6.1866|orf6.264|CA0752|MNN24|CaO19.3803	ORF|Uncharacterized	Putative Golgi alpha-1,2-mannosyltransferase; regulated by Tsa1p, Tsa1Bp in minimal media at 37 deg; Hog1p-induced; induced by nitric oxide; downregulated in core stress response; planktonic growth-induced gene	G385G	T1154C	orf19.3803-P	2	NOISE
Ca21chr4_C_albicans_SC5314	1019536	G	A	68	59	13	41	orf19.3803	MNN22	orf19.11284|IPF10363.2|IPF10361.3|Contig4-2432_0003|orf6.1866|orf6.264|CA0752|MNN24|CaO19.3803	ORF|Uncharacterized	Putative Golgi alpha-1,2-mannosyltransferase; regulated by Tsa1p, Tsa1Bp in minimal media at 37 deg; Hog1p-induced; induced by nitric oxide; downregulated in core stress response; planktonic growth-induced gene	P375P	G1124A	orf19.3803-P	2	NOISE
Ca21chr4_C_albicans_SC5314	1027760	G	A	83	48	27	61	orf19.3801	FAV1	orf19.11282|IPF9090.2|IPF28628.1|Contig4-2789_0005|Contig4-3100_0023|orf6.201|orf6.2919|CA1424|CaO19.3801|IPF9090	ORF|Uncharacterized	Protein with weak similarity to S. cerevisiae Fus2p; induced by alpha pheromone mating factor in MTLa/MTLa opaque cells	G43S	G126A	orf19.3801-P	2	NOISE
Ca21chr4_C_albicans_SC5314	1029340	A	G	80	74	29	59	orf19.3801	FAV1	orf19.11282|IPF9090.2|IPF28628.1|Contig4-2789_0005|Contig4-3100_0023|orf6.201|orf6.2919|CA1424|CaO19.3801|IPF9090	ORF|Uncharacterized	Protein with weak similarity to S. cerevisiae Fus2p; induced by alpha pheromone mating factor in MTLa/MTLa opaque cells	L569L	A1706G	orf19.3801-P	2	NOISE
Ca21chr4_C_albicans_SC5314	1032160	A	C	76	75	23	62								UPSTREAM:orf19.3799-P	2	NOISE
Ca21chr4_C_albicans_SC5314	1032214	C	T	68	69	12	40								UPSTREAM:orf19.3799-P	2	NOISE
Ca21chr4_C_albicans_SC5314	1064995	T	G	80	74	16	74	orf19.3782		orf19.11263|IPF14805.2|IPF28636.1|Contig4-2732_0001|Contig4-2732_0003|orf6.2554|CA1183|CaO19.11263|CaO19.3782|IPF14805	ORF|Uncharacterized	Predicted membrane transporter, member of the peptide-acetyl-coA transporter (PAT) family, major facilitator superfamily (MFS); transcription is induced in response to alpha pheromone in Spider medium	V357V	T1070G	orf19.3782-P	2	NOISE
Ca21chr4_C_albicans_SC5314	1065028	G	A	91	88	22	71	orf19.3782		orf19.11263|IPF14805.2|IPF28636.1|Contig4-2732_0001|Contig4-2732_0003|orf6.2554|CA1183|CaO19.11263|CaO19.3782|IPF14805	ORF|Uncharacterized	Predicted membrane transporter, member of the peptide-acetyl-coA transporter (PAT) family, major facilitator superfamily (MFS); transcription is induced in response to alpha pheromone in Spider medium	G368G	G1103A	orf19.3782-P	2	NOISE
Ca21chr4_C_albicans_SC5314	1067874	A	T	77	75	15	72								UPSTREAM:orf19.3780-P	2	NOISE
Ca21chr4_C_albicans_SC5314	1067991	G	A	54	68	11	54								UPSTREAM:orf19.3780-P	2	NOISE
Ca21chr4_C_albicans_SC5314	1070488	G	A	79	69	23	67	orf19.3778		orf19.11259|orf19.11260|IPF23474.1|IPF23478.1|IPF15219.2|IPF15217.2|Contig4-2648_0005|Contig4-2648_0007|orf6.2592|orf6.1133|orf6.1132|CA0328|CA0327|orf19.3779|IPF15217.3f	ORF|Verified	Hap43p-induced gene; mutation confers hypersensitivity to 5-fluorocytosine (5-FC), 5-fluorouracil (5-FU); downregulated in core stress response; decreased expression in response to prostaglandins	A273T	G816A	orf19.3778-P	2	NOISE
Ca21chr4_C_albicans_SC5314	1070517	C	T	78	78	26	80	orf19.3778		orf19.11259|orf19.11260|IPF23474.1|IPF23478.1|IPF15219.2|IPF15217.2|Contig4-2648_0005|Contig4-2648_0007|orf6.2592|orf6.1133|orf6.1132|CA0328|CA0327|orf19.3779|IPF15217.3f	ORF|Verified	Hap43p-induced gene; mutation confers hypersensitivity to 5-fluorocytosine (5-FC), 5-fluorouracil (5-FU); downregulated in core stress response; decreased expression in response to prostaglandins	A282A	C845T	orf19.3778-P	2	NOISE
Ca21chr4_C_albicans_SC5314	1078485	A	G	75	68	28	57	orf19.3774	PPG1	orf19.11256|IPF18739.1|IPF15402.2|Contig4-2542_0004|Contig4-2542_0005|orf6.2291|orf6.2595|CA1207|CaO19.3774	ORF|Uncharacterized	Putative protein phosphatase of the Type 2A-related family (serine/threonine-specific), similar to S. cerevisiae Ppg1p; possibly an essential gene, disruptants not obtained by UAU1 method	T136T	A407G	orf19.3774-P	2	NOISE
Ca21chr4_C_albicans_SC5314	1078580	G	A	66	78	14	60	orf19.3774	PPG1	orf19.11256|IPF18739.1|IPF15402.2|Contig4-2542_0004|Contig4-2542_0005|orf6.2291|orf6.2595|CA1207|CaO19.3774	ORF|Uncharacterized	Putative protein phosphatase of the Type 2A-related family (serine/threonine-specific), similar to S. cerevisiae Ppg1p; possibly an essential gene, disruptants not obtained by UAU1 method	V105I	G312A	orf19.3774-P	2	NOISE
Ca21chr4_C_albicans_SC5314	1107246	G	T	91	60	15	51								UPSTREAM:orf19.742-P	2	NOISE
Ca21chr4_C_albicans_SC5314	1107354	C	T	48	59	17	53								UPSTREAM:orf19.742-P	2	NOISE
Ca21chr4_C_albicans_SC5314	1134916	A	C	54	47	8	34								UPSTREAM:orf19.6862-P	2	NOISE
Ca21chr4_C_albicans_SC5314	1134924	T	C	60	44	8	34								UPSTREAM:orf19.6862-P	2	NOISE
Ca21chr4_C_albicans_SC5314	1155010	G	A	59	57	26	63	orf19.1290	XKS1	orf19.9354|IPF19103.2|IPF25535.1|IPF25530.1|IPF10471.2|IPF10472.2|Contig4-2660_0006|orf6.909|orf6.1156|CA0341|orf19.1788	ORF|Uncharacterized	Putative xylulokinase; Hap43p-repressed gene; increased expression in response to prostaglandins	K85K	G254A	orf19.1290-P	2	NOISE
Ca21chr4_C_albicans_SC5314	1156315	C	A	55	69	20	56	orf19.1290	XKS1	orf19.9354|IPF19103.2|IPF25535.1|IPF25530.1|IPF10471.2|IPF10472.2|Contig4-2660_0006|orf6.909|orf6.1156|CA0341|orf19.1788	ORF|Uncharacterized	Putative xylulokinase; Hap43p-repressed gene; increased expression in response to prostaglandins	G520G	C1559A	orf19.1290-P	2	NOISE
Ca21chr4_C_albicans_SC5314	1176077	T	C	96	76	13	48								UPSTREAM:orf19.1795.1-P	2	NOISE
Ca21chr4_C_albicans_SC5314	1176127	A	G	84	85	8	57								UPSTREAM:orf19.1795.1-P	2	NOISE
Ca21chr4_C_albicans_SC5314	1218591	G	A	80	73	34	68	orf19.1239		orf19.8824|IPF12540.1|IPF29520.1|Contig4-2139_0003|orf6.5078|CA2974|CaO19.1239|CaO19.8824|IPF12540	ORF|Uncharacterized	Secreted protein; exogenously expressed protein is a substrate for Kex2p processing in vitro; fluconazole-regulated	E152E	G455A	orf19.1239-P	2	NOISE
Ca21chr4_C_albicans_SC5314	1218888	G	A	79	79	35	86	orf19.1239		orf19.8824|IPF12540.1|IPF29520.1|Contig4-2139_0003|orf6.5078|CA2974|CaO19.1239|CaO19.8824|IPF12540	ORF|Uncharacterized	Secreted protein; exogenously expressed protein is a substrate for Kex2p processing in vitro; fluconazole-regulated	A53A	G158A	orf19.1239-P	2	NOISE
Ca21chr4_C_albicans_SC5314	1244258	T	A	78	67	7	50								UPSTREAM:orf19.1251-P	2	NOISE
Ca21chr4_C_albicans_SC5314	1244298	T	C	78	67	15	37								UPSTREAM:orf19.1251-P	2	NOISE
Ca21chr4_C_albicans_SC5314	1264608	C	A	64	72	19	53	orf19.1258		orf19.8843|IPF15051.2|IPF29522.1|Contig4-2968_0001|orf6.402|orf6.5725|CA0066|CaO19.1258|IPF15051	ORF|Uncharacterized	Putative adhesin-like protein; regulated by Tsa1p, Tsa1Bp in minimal media at 37 deg; transcription is induced in response to alpha pheromone in SpiderM medium; clade-associated gene expression; Hap43p-induced gene	A205D	C613A	orf19.1258-P	2	NOISE
Ca21chr4_C_albicans_SC5314	1264691	T	C	68	75	19	54	orf19.1258		orf19.8843|IPF15051.2|IPF29522.1|Contig4-2968_0001|orf6.402|orf6.5725|CA0066|CaO19.1258|IPF15051	ORF|Uncharacterized	Putative adhesin-like protein; regulated by Tsa1p, Tsa1Bp in minimal media at 37 deg; transcription is induced in response to alpha pheromone in SpiderM medium; clade-associated gene expression; Hap43p-induced gene	S233P	T696C	orf19.1258-P	2	NOISE
Ca21chr4_C_albicans_SC5314	1290587	C	T	84	60	11	56								UPSTREAM:orf19.1268-P	2	NOISE
Ca21chr4_C_albicans_SC5314	1290596	T	G	88	58	13	57								UPSTREAM:orf19.1268-P	2	NOISE
Ca21chr4_C_albicans_SC5314	1291193	A	G	77	51	20	53								UPSTREAM:orf19.1270-P	2	NOISE
Ca21chr4_C_albicans_SC5314	1291297	A	T	70	65	8	32								UPSTREAM:orf19.1270-P	2	NOISE
Ca21chr4_C_albicans_SC5314	1305552	C	T	88	87	22	98	orf19.1277		orf19.8864|IPF19348.2|IPF11858.2|Contig4-2741_0002|orf6.2900|orf6.303|CA1411|CaO19.1277|IPF11858	ORF|Uncharacterized	Hap43p-repressed gene; repressed by Rgt1p; late-stage biofilm-induced gene	H301H	C902T	orf19.1277-P	2	NOISE
Ca21chr4_C_albicans_SC5314	1306392	C	T	64	39	8	31	orf19.1277		orf19.8864|IPF19348.2|IPF11858.2|Contig4-2741_0002|orf6.2900|orf6.303|CA1411|CaO19.1277|IPF11858	ORF|Uncharacterized	Hap43p-repressed gene; repressed by Rgt1p; late-stage biofilm-induced gene	P21P	C62T	orf19.1277-P	2	NOISE
Ca21chr4_C_albicans_SC5314	1351280	A	C	51	65	9	42								UPSTREAM:orf19.4418.1-P	2	NOISE
Ca21chr4_C_albicans_SC5314	1351308	T	C	58	69	6	48								UPSTREAM:orf19.4418.1-P	2	NOISE
Ca21chr4_C_albicans_SC5314	1378078	T	G	62	39	10	46								UPSTREAM:orf19.2923-P	2	NOISE
Ca21chr4_C_albicans_SC5314	1378129	A	T	65	54	12	57								UPSTREAM:orf19.2923-P	2	NOISE
Ca21chr4_C_albicans_SC5314	1381308	G	A	81	84	27	68	orf19.2920		orf19.10437|IPF17317.1|IPF11444.1|Contig4-2802_0005|orf6.167|orf6.3458|CA1801|CaO19.2920|IPF11444	ORF|Uncharacterized	S. cerevisiae ortholog TMA20 has role in ribosome biogenesis and localizes to ribosome, cytoplasm	Q76Q	G227A	orf19.2920-P	2	NOISE
Ca21chr4_C_albicans_SC5314	1381350	G	A	84	86	22	73	orf19.2920		orf19.10437|IPF17317.1|IPF11444.1|Contig4-2802_0005|orf6.167|orf6.3458|CA1801|CaO19.2920|IPF11444	ORF|Uncharacterized	S. cerevisiae ortholog TMA20 has role in ribosome biogenesis and localizes to ribosome, cytoplasm	A62A	G185A	orf19.2920-P	2	NOISE
Ca21chr4_C_albicans_SC5314	1386332	T	C	73	63	27	63	orf19.2917.1			ORF|Uncharacterized		L42L	T123C	orf19.2917.1-P	2	NOISE
Ca21chr4_C_albicans_SC5314	1386350	A	G	75	66	26	63	orf19.2917.1			ORF|Uncharacterized		S48G	A141G	orf19.2917.1-P	2	NOISE
Ca21chr4_C_albicans_SC5314	1399905	T	G	83	83	14	61								UPSTREAM:orf19.2908-P	2	NOISE
Ca21chr4_C_albicans_SC5314	1400553	G	C	73	71	23	51								UPSTREAM:orf19.2908-P	2	NOISE
Ca21chr4_C_albicans_SC5314	1402519	A	C	86	79	16	71	orf19.2906	PGA41	orf19.10424|IPF19507.2|IPF13070.2|Contig4-2946_0014|orf6.6116|orf6.259|CA3763|CaO19.2906|IPF13070	ORF|Uncharacterized	Putative GPI-anchored protein; adhesin-like protein	L288F	A863C	orf19.2906-P	2	NOISE
Ca21chr4_C_albicans_SC5314	1402642	A	G	76	60	16	52	orf19.2906	PGA41	orf19.10424|IPF19507.2|IPF13070.2|Contig4-2946_0014|orf6.6116|orf6.259|CA3763|CaO19.2906|IPF13070	ORF|Uncharacterized	Putative GPI-anchored protein; adhesin-like protein	K247K	A740G	orf19.2906-P	2	NOISE
Ca21chr4_C_albicans_SC5314	1420791	G	A	82	75	6	53								UPSTREAM:orf19.2895-P	2	NOISE
Ca21chr4_C_albicans_SC5314	1420801	T	C	95	78	7	48								UPSTREAM:orf19.2895-P	2	NOISE
Ca21chr4_C_albicans_SC5314	1434287	A	G	48	39	15	41	orf19.2888		orf19.10406|IPF24448.1|IPF10431.2|Contig4-2827_0010|orf6.6134|CA3778|CaO19.2888|CaO19.10406|IPF10431	ORF|Uncharacterized		T192T	A575G	orf19.2888-P	2	NOISE
Ca21chr4_C_albicans_SC5314	1434827	A	G	73	87	14	40	orf19.2888		orf19.10406|IPF24448.1|IPF10431.2|Contig4-2827_0010|orf6.6134|CA3778|CaO19.2888|CaO19.10406|IPF10431	ORF|Uncharacterized		K12K	A35G	orf19.2888-P	2	NOISE
Ca21chr4_C_albicans_SC5314	1436415	A	G	65	68	17	47	orf19.2887		orf19.10405|IPF10429.2|IPF28949.1|Contig4-2827_0012|orf6.1818|orf6.6135|CA0721|CaO19.2887|IPF10429	ORF|Uncharacterized	S. cerevisiae ortholog YMR295C localizes to ribosome, cellular bud, mating projection tip	Q15R	A43G	orf19.2887-P	2	NOISE
Ca21chr4_C_albicans_SC5314	1436788	C	T	44	53	17	39	orf19.2887		orf19.10405|IPF10429.2|IPF28949.1|Contig4-2827_0012|orf6.1818|orf6.6135|CA0721|CaO19.2887|IPF10429	ORF|Uncharacterized	S. cerevisiae ortholog YMR295C localizes to ribosome, cellular bud, mating projection tip	P139P	C416T	orf19.2887-P	2	NOISE
Ca21chr4_C_albicans_SC5314	1441962	C	T	66	73	19	60								UPSTREAM:orf19.2884-P	2	NOISE
Ca21chr4_C_albicans_SC5314	1442038	A	T	65	66	14	48								UPSTREAM:orf19.2884-P	2	NOISE
Ca21chr4_C_albicans_SC5314	1485206	C	T	67	64	11	47	orf19.2867		orf19.10385|IPF24421.1|IPF3255.2|Contig4-3009_0013|Contig4-3009_0014|orf6.1535|CA0543|CaO19.2867|VPS5|CaO19.10385|IPF3255	ORF|Uncharacterized	S. cerevisiae ortholog VPS5 has phosphatidylinositol-3-phosphate binding, protein transporter activity and has role in protein retention in Golgi apparatus, retrograde transport, endosome to Golgi	N263N	C788T	orf19.2867-P	2	NOISE
Ca21chr4_C_albicans_SC5314	1485467	T	C	76	71	12	33	orf19.2867		orf19.10385|IPF24421.1|IPF3255.2|Contig4-3009_0013|Contig4-3009_0014|orf6.1535|CA0543|CaO19.2867|VPS5|CaO19.10385|IPF3255	ORF|Uncharacterized	S. cerevisiae ortholog VPS5 has phosphatidylinositol-3-phosphate binding, protein transporter activity and has role in protein retention in Golgi apparatus, retrograde transport, endosome to Golgi	F350F	T1049C	orf19.2867-P	2	NOISE
Ca21chr4_C_albicans_SC5314	1490404	A	G	62	68	18	51	orf19.3142		orf19.10654|IPF24177.1|IPF3259.2|Contig4-3009_0008|orf6.1853|CA0742|CaO19.10654|CaO19.3142|IPF3259	ORF|Uncharacterized		P229P	A686G	orf19.3142-P	2	NOISE
Ca21chr4_C_albicans_SC5314	1490437	C	G	65	69	20	51	orf19.3142		orf19.10654|IPF24177.1|IPF3259.2|Contig4-3009_0008|orf6.1853|CA0742|CaO19.10654|CaO19.3142|IPF3259	ORF|Uncharacterized		S240S	C719G	orf19.3142-P	2	NOISE
Ca21chr4_C_albicans_SC5314	1510514	A	G	90	80	33	75	orf19.3132		orf19.10644|IPF24161.1|IPF7815.2|Contig4-2291_0002|Contig4-2291_0003|Contig4-2291_0004|orf6.5869|CA3565|CaO19.10644|MSC2|CaO19.3132	ORF|Uncharacterized	Predicted ORF in Assemblies 19, 20 and 21; induced by nitric oxide	Q248Q	A743G	orf19.3132-P	2	NOISE
Ca21chr4_C_albicans_SC5314	1510529	T	A	91	78	32	75	orf19.3132		orf19.10644|IPF24161.1|IPF7815.2|Contig4-2291_0002|Contig4-2291_0003|Contig4-2291_0004|orf6.5869|CA3565|CaO19.10644|MSC2|CaO19.3132	ORF|Uncharacterized	Predicted ORF in Assemblies 19, 20 and 21; induced by nitric oxide	S253S	T758A	orf19.3132-P	2	NOISE
Ca21chr4_C_albicans_SC5314	1514139	A	G	67	77	23	50	orf19.3130		orf19.10642|IPF24185.1|IPF7819.2|orf6.5867|CA3563|CaO19.3130|CaO19.10642|IPF7819	ORF|Uncharacterized	Predicted ORF in Assemblies 19, 20 and 21; possibly an essential gene, disruptants not obtained by UAU1 method	E65E	A194G	orf19.3130-P	2	NOISE
Ca21chr4_C_albicans_SC5314	1514331	A	G	62	71	19	54	orf19.3130		orf19.10642|IPF24185.1|IPF7819.2|orf6.5867|CA3563|CaO19.3130|CaO19.10642|IPF7819	ORF|Uncharacterized	Predicted ORF in Assemblies 19, 20 and 21; possibly an essential gene, disruptants not obtained by UAU1 method	L129L	A386G	orf19.3130-P	2	NOISE
Ca21chr4_C_albicans_SC5314	1529888	A	G	69	73	19	46	orf19.3125		orf19.10637|IPF12412|IPF24188.1|IPF12412.2|orf6.6920|CA4386|CaO19.3125|CaO19.10637	ORF|Uncharacterized	Protein not essential for viability	E25G	A73G	orf19.3125-P	2	NOISE
Ca21chr4_C_albicans_SC5314	1530020	T	C	73	73	21	51	orf19.3125		orf19.10637|IPF12412|IPF24188.1|IPF12412.2|orf6.6920|CA4386|CaO19.3125|CaO19.10637	ORF|Uncharacterized	Protein not essential for viability	V69A	T205C	orf19.3125-P	2	NOISE
Ca21chr4_C_albicans_SC5314	1531810	C	A	69	49	10	44								UPSTREAM:orf19.3124-P	2	NOISE
Ca21chr4_C_albicans_SC5314	1531824	C	A	73	49	11	43								UPSTREAM:orf19.3124-P	2	NOISE
Ca21chr4_C_albicans_SC5314	1568020	T	C	75	55	14	37								UPSTREAM:orf19.3099-P	2	NOISE
Ca21chr4_C_albicans_SC5314	1568100	A	T	52	49	5	30								UPSTREAM:orf19.3099-P	2	NOISE
Ca21chr4_C_albicans_SC5314	1576404	T	G	129	2	99	13	orf19.3093	MSH2	orf19.10605|IPF24154.1|IPF1746.1|Contig4-2877_0007|orf6.6952|CA4413|CaO19.10605|CaO19.3093	ORF|Uncharacterized	Putative DNA mismatch repair factor; transcription is regulated by Nrg1p; flucytosine repressed; RNA abundance regulated by tyrosol and cell density	I661M	T1982G	orf19.3093-P	2	NOISE
Ca21chr4_C_albicans_SC5314	1576581	C	T	79	59	27	90	orf19.3093	MSH2	orf19.10605|IPF24154.1|IPF1746.1|Contig4-2877_0007|orf6.6952|CA4413|CaO19.10605|CaO19.3093	ORF|Uncharacterized	Putative DNA mismatch repair factor; transcription is regulated by Nrg1p; flucytosine repressed; RNA abundance regulated by tyrosol and cell density	F602F	C1805T	orf19.3093-P	2	NOISE
Ca21chr4_C_albicans_SC5314	1597148	A	C	50	41	7	52								UPSTREAM:orf19.3077-P	2	NOISE
Ca21chr4_C_albicans_SC5314	1597207	C	G	66	46	13	41								UPSTREAM:orf19.3077-P	2	NOISE
Ca21chr5_C_albicans_SC5314	139585	G	C	69	67	18	41	orf19.928		orf19.8543|IPF26323.1|IPF8421.2|Contig4-2136_0006|orf6.2860|CA1382|CaO19.928|CaO19.8543|IPF8421	ORF|Uncharacterized		R598T	G1792C	orf19.928-P	2	NOISE
Ca21chr5_C_albicans_SC5314	139587	T	C	68	66	18	41	orf19.928		orf19.8543|IPF26323.1|IPF8421.2|Contig4-2136_0006|orf6.2860|CA1382|CaO19.928|CaO19.8543|IPF8421	ORF|Uncharacterized		T597T	T1790C	orf19.928-P	2	NOISE
Ca21chr5_C_albicans_SC5314	146392	A	G	134	12	32	7								UPSTREAM:orf19.925-P	2	NOISE
Ca21chr5_C_albicans_SC5314	146393	A	T	140	11	33	6								UPSTREAM:orf19.925-P	2	NOISE
Ca21chr5_C_albicans_SC5314	150006	C	A	23	53	0	13								UPSTREAM:orf19.922-P	2	NOISE
Ca21chr5_C_albicans_SC5314	150399	A	C	166	0	40	6								UPSTREAM:orf19.922-P	2	NOISE
Ca21chr5_C_albicans_SC5314	343849	G	T	67	71	14	38	orf19.4149		orf19.11625|IPF23121.1|IPF11625.2|Contig4-2850_0005|Contig4-2850_0007|orf6.5230|CA3084|CaO19.4149|CaO19.11625|IPF11625	ORF|Uncharacterized	Predicted ORF in Assemblies 19, 20 and 21; overlaps orf19.4149.1	G19V	G55T	orf19.4149-P	2	NOISE
Ca21chr5_C_albicans_SC5314	343889	G	T	127	5	30	6	orf19.4149		orf19.11625|IPF23121.1|IPF11625.2|Contig4-2850_0005|Contig4-2850_0007|orf6.5230|CA3084|CaO19.4149|CaO19.11625|IPF11625	ORF|Uncharacterized	Predicted ORF in Assemblies 19, 20 and 21; overlaps orf19.4149.1	D6Y	G15T	orf19.4149-P	2	NOISE
Ca21chr5_C_albicans_SC5314	444827	T	C	88	64	12	33								UPSTREAM:orf19.3172-P	2	NOISE
Ca21chr5_C_albicans_SC5314	446052	T	A	72	65	17	40								UPSTREAM:orf19.3172-P	2	NOISE
Ca21chr5_C_albicans_SC5314	603898	T	A	82	67	23	61	orf19.4284	BUR2	orf19.11760|IPF2971|IPF22971.1|IPF2971.2|Contig4-3019_0001|orf6.5202|CA3063|SPX63|CaO19.4284|CaO19.11760	ORF|Uncharacterized	Protein with similarity to S. cerevisiae Bur2p, contains a cyclin domain; not required for wild-type hyphal growth, adherence to buccal epithelial cells, or virulence in mouse systemic infection	V377E	T1129A	orf19.4284-P	2	NOISE
Ca21chr5_C_albicans_SC5314	603905	A	C	75	64	23	58	orf19.4284	BUR2	orf19.11760|IPF2971|IPF22971.1|IPF2971.2|Contig4-3019_0001|orf6.5202|CA3063|SPX63|CaO19.4284|CaO19.11760	ORF|Uncharacterized	Protein with similarity to S. cerevisiae Bur2p, contains a cyclin domain; not required for wild-type hyphal growth, adherence to buccal epithelial cells, or virulence in mouse systemic infection	E379D	A1136C	orf19.4284-P	2	NOISE
Ca21chr5_C_albicans_SC5314	639257	C	T	137	0	42	8	orf19.4309	GRP2	orf19.11785|Contig4-2902_0012|GRE99|IPF18654.2|IPF2918.2|orf6.3162|orf6.4614|CA2644|GRE22|CaO19.4309	ORF|Verified	Methylglyoxal reductase; antigenic in humans; regulation associated with azole resistance; induced in core stress response or by oxidative stress (via Cap1p), fluphenazine, benomyl, or with long term fluconazole treatment; Hap43p-induced	D258D	C773T	orf19.4309-P	2	NOISE
Ca21chr5_C_albicans_SC5314	639263	A	T	145	0	43	8	orf19.4309	GRP2	orf19.11785|Contig4-2902_0012|GRE99|IPF18654.2|IPF2918.2|orf6.3162|orf6.4614|CA2644|GRE22|CaO19.4309	ORF|Verified	Methylglyoxal reductase; antigenic in humans; regulation associated with azole resistance; induced in core stress response or by oxidative stress (via Cap1p), fluphenazine, benomyl, or with long term fluconazole treatment; Hap43p-induced	A256A	A767T	orf19.4309-P	2	NOISE
Ca21chr5_C_albicans_SC5314	740438	A	T	146	8	65	9								UPSTREAM:orf19.2653-P	2	NOISE
Ca21chr5_C_albicans_SC5314	740611	G	C	83	67	25	58								UPSTREAM:orf19.2653-P	2	NOISE
Ca21chr5_C_albicans_SC5314	824598	A	G	84	78	25	52	orf19.1122		orf19.8720|IPF2328.2|IPF13870.2|Contig4-1915_0004|orf6.1197|orf6.3474|CA0360|HWH1|CaO19.1122|IPF2328	ORF|Uncharacterized	Predicted ORF in Assemblies 19, 20 and 21; transcription is induced in response to alpha pheromone in SpiderM medium	N112S	A334G	orf19.1122-P	2	NOISE
Ca21chr5_C_albicans_SC5314	824725	G	A	83	65	31	70	orf19.1122		orf19.8720|IPF2328.2|IPF13870.2|Contig4-1915_0004|orf6.1197|orf6.3474|CA0360|HWH1|CaO19.1122|IPF2328	ORF|Uncharacterized	Predicted ORF in Assemblies 19, 20 and 21; transcription is induced in response to alpha pheromone in SpiderM medium	G154G	G461A	orf19.1122-P	2	NOISE
Ca21chr5_C_albicans_SC5314	901102	C	T	69	68	20	50	orf19.1285		orf19.8872|IPF26042.1|IPF10590.2|orf6.4240|CA2363|CaO19.8872|CaO19.1285|IPF10590	ORF|Verified	Plasma membrane-localized protein of unknown function; Hap43p-repressed gene	S592S	C1775T	orf19.1285-P	2	NOISE
Ca21chr5_C_albicans_SC5314	901733	A	G	84	67	32	62	orf19.1285		orf19.8872|IPF26042.1|IPF10590.2|orf6.4240|CA2363|CaO19.8872|CaO19.1285|IPF10590	ORF|Verified	Plasma membrane-localized protein of unknown function; Hap43p-repressed gene	I803V	A2406G	orf19.1285-P	2	NOISE
Ca21chr5_C_albicans_SC5314	902549	G	A	80	85	27	57	orf19.1283	MEC1	orf19.8870|IPF19757.1|IPF29511.1|Contig4-2808_0008|Contig4-2808_0009|Contig4-2808_0011|orf6.4242|CA2364|CaO19.1283	ORF|Verified	Cell cycle checkpoint protein with a role in genome integrity; RNA abundance regulated by tyrosol and cell density	W2199*	G6596A	orf19.1283-P	2	NOISE
Ca21chr5_C_albicans_SC5314	903451	G	A	57	58	25	51	orf19.1283	MEC1	orf19.8870|IPF19757.1|IPF29511.1|Contig4-2808_0008|Contig4-2808_0009|Contig4-2808_0011|orf6.4242|CA2364|CaO19.1283	ORF|Verified	Cell cycle checkpoint protein with a role in genome integrity; RNA abundance regulated by tyrosol and cell density	V1899I	G5694A	orf19.1283-P	2	NOISE
Ca21chr5_C_albicans_SC5314	930933	T	C	61	74	17	48	orf19.3901		orf19.11382|IPF11499.2|IPF28558.1|Contig4-2263_0001|Contig4-2263_0003|orf6.5147|CA3026|CaO19.3901|SOX2|CaO19.11382|IFZ1|IPF11499.repeat1	ORF|Uncharacterized	Putative benzene desulfurase; induced by nitric oxide independent of Yhb1p	S165S	T494C	orf19.3901-P	2	NOISE
Ca21chr5_C_albicans_SC5314	931140	A	G	61	66	17	54	orf19.3901		orf19.11382|IPF11499.2|IPF28558.1|Contig4-2263_0001|Contig4-2263_0003|orf6.5147|CA3026|CaO19.3901|SOX2|CaO19.11382|IFZ1|IPF11499.repeat1	ORF|Uncharacterized	Putative benzene desulfurase; induced by nitric oxide independent of Yhb1p	L234L	A701G	orf19.3901-P	2	NOISE
Ca21chr5_C_albicans_SC5314	936041	T	C	73	67	33	65								UPSTREAM:orf19.3903-P	2	NOISE
Ca21chr5_C_albicans_SC5314	936045	C	T	72	68	31	65								UPSTREAM:orf19.3903-P	2	NOISE
Ca21chr5_C_albicans_SC5314	943210	G	A	112	0	71	10	orf19.3908		orf19.11389|IPF23305.1|IPF15492.2|Contig4-2027_0003|orf6.5140|CA3020|CaO19.11389|CaO19.3908|IPF15492	ORF|Uncharacterized		V56V	G167A	orf19.3908-P	2	NOISE
Ca21chr5_C_albicans_SC5314	943216	T	A	113	0	66	8	orf19.3908		orf19.11389|IPF23305.1|IPF15492.2|Contig4-2027_0003|orf6.5140|CA3020|CaO19.11389|CaO19.3908|IPF15492	ORF|Uncharacterized		I58I	T173A	orf19.3908-P	2	NOISE
Ca21chr5_C_albicans_SC5314	957587	C	T	75	74	27	57	orf19.3916		orf19.11398|orf19.11399|IPF23300.1|IPF12695.2|Contig4-2398_0001|Contig4-2730_0015|orf6.4060|orf6.4059|CA2238|CA2237|orf19.3917|IPF10032.5f|IPF10032.2	ORF|Uncharacterized		Y405Y	C1214T	orf19.3916-P	2	NOISE
Ca21chr5_C_albicans_SC5314	957602	G	A	62	69	23	51	orf19.3916		orf19.11398|orf19.11399|IPF23300.1|IPF12695.2|Contig4-2398_0001|Contig4-2730_0015|orf6.4060|orf6.4059|CA2238|CA2237|orf19.3917|IPF10032.5f|IPF10032.2	ORF|Uncharacterized		M410I	G1229A	orf19.3916-P	2	NOISE
Ca21chr5_C_albicans_SC5314	999586	T	A	87	57	30	60	orf19.3944	GRR1	orf19.11426|IPF23206.1|IPF14608.2|Contig4-1767_0001|Contig4-1767_0003|Contig4-2929_0020|orf6.3231|CA1638|CaO19.3944|CaO19.11426	ORF|Verified	Protein involved in the negative control of pseudohyphal growth; ortholog of S. cerevisiae Grr1p, which is an F-box protein component of the SCF ubiquitin-ligase complex required for cell cycle progression	P346P	T1037A	orf19.3944-P	2	NOISE
Ca21chr5_C_albicans_SC5314	999629	A	G	91	74	32	65	orf19.3944	GRR1	orf19.11426|IPF23206.1|IPF14608.2|Contig4-1767_0001|Contig4-1767_0003|Contig4-2929_0020|orf6.3231|CA1638|CaO19.3944|CaO19.11426	ORF|Verified	Protein involved in the negative control of pseudohyphal growth; ortholog of S. cerevisiae Grr1p, which is an F-box protein component of the SCF ubiquitin-ligase complex required for cell cycle progression	*332*	A994G	orf19.3944-P	2	NOISE
Ca21chr5_C_albicans_SC5314	1043779	C	A	156	2	66	8	orf19.3967	PFK1	orf19.11449|IPF23197.1|IPF5769.1|Contig4-3081_0016|orf6.3504|CA1834|CaO19.11449|CaO19.3967	ORF|Verified	Phosphofructokinase alpha subinit, Pfk1p-Pfk2p heteromultimer; activated by fructose 2,6-bisphosphate, AMP, inhibited by ATP; activity reduced on hyphal induction; phagocytosis-downregulated; fluconazole-induced; biofilm-induced	Q849K	C2544A	orf19.3967-P	2	NOISE
Ca21chr5_C_albicans_SC5314	1043921	T	G	187	0	77	10	orf19.3967	PFK1	orf19.11449|IPF23197.1|IPF5769.1|Contig4-3081_0016|orf6.3504|CA1834|CaO19.11449|CaO19.3967	ORF|Verified	Phosphofructokinase alpha subinit, Pfk1p-Pfk2p heteromultimer; activated by fructose 2,6-bisphosphate, AMP, inhibited by ATP; activity reduced on hyphal induction; phagocytosis-downregulated; fluconazole-induced; biofilm-induced	V896G	T2686G	orf19.3967-P	2	NOISE
Ca21chr5_C_albicans_SC5314	1052777	A	G	54	49	13	36								UPSTREAM:orf19.3969-P	2	NOISE
Ca21chr5_C_albicans_SC5314	1052780	T	C	58	48	12	35								UPSTREAM:orf19.3969-P	2	NOISE
Ca21chr5_C_albicans_SC5314	1085373	T	C	64	47	11	31								UPSTREAM:orf19.3983-P	2	NOISE
Ca21chr5_C_albicans_SC5314	1085649	C	T	123	8	73	9								UPSTREAM:orf19.3983-P	2	NOISE
Ca21chr5_C_albicans_SC5314	1098147	C	A	127	6	49	8	orf19.3990		orf19.11473|IPF23301.1|IPF9652.2|Contig4-2740_0008|orf6.7403|CA4760|CaO19.11473|CaO19.3990|IPF9652	ORF|Uncharacterized	S. cerevisiae ortholog RPC17 has DNA-directed RNA polymerase activity and has role in tRNA transcription from RNA polymerase III promoter, transcription initiation from RNA polymerase III promoter	A148E	C442A	orf19.3990-P	2	NOISE
Ca21chr5_C_albicans_SC5314	1098150	G	A	97	6	35	8	orf19.3990		orf19.11473|IPF23301.1|IPF9652.2|Contig4-2740_0008|orf6.7403|CA4760|CaO19.11473|CaO19.3990|IPF9652	ORF|Uncharacterized	S. cerevisiae ortholog RPC17 has DNA-directed RNA polymerase activity and has role in tRNA transcription from RNA polymerase III promoter, transcription initiation from RNA polymerase III promoter	G149E	G445A	orf19.3990-P	2	NOISE
Ca21chr5_C_albicans_SC5314	1110124	C	T	80	62	25	52	orf19.3999		orf19.11482|IPF23207.1|IPF13054.2|Contig4-2534_0009|orf6.7412|CA4767|CaO19.11482|CaO19.3999|IPF13054	ORF|Uncharacterized		P80L	C238T	orf19.3999-P	2	NOISE
Ca21chr5_C_albicans_SC5314	1111572	A	G	75	70	25	51	orf19.3999		orf19.11482|IPF23207.1|IPF13054.2|Contig4-2534_0009|orf6.7412|CA4767|CaO19.11482|CaO19.3999|IPF13054	ORF|Uncharacterized		I563V	A1686G	orf19.3999-P	2	NOISE
Ca21chr5_C_albicans_SC5314	1126152	T	C	66	108	33	66	orf19.4003	TIP20	orf19.11486|orf6.7416|IPF23205.1|IPF3336.2|Contig4-2616_0011|CA4771|CaO19.11486|CaO19.4003|IPF3336	ORF|Verified	Protein interacting with Sec20p, possibly involved in retrograde transport between the Golgi and the endoplasmic reticulum; similar to S. cerevisiae Tip20p	N473N	T1418C	orf19.4003-P	2	NOISE
Ca21chr5_C_albicans_SC5314	1126656	C	T	79	92	28	62	orf19.4003	TIP20	orf19.11486|orf6.7416|IPF23205.1|IPF3336.2|Contig4-2616_0011|CA4771|CaO19.11486|CaO19.4003|IPF3336	ORF|Verified	Protein interacting with Sec20p, possibly involved in retrograde transport between the Golgi and the endoplasmic reticulum; similar to S. cerevisiae Tip20p	F305F	C914T	orf19.4003-P	2	NOISE
Ca21chr5_C_albicans_SC5314	1182059	C	T	147	3	50	12								UPSTREAM:orf19.4051-P	2	NOISE
Ca21chr5_C_albicans_SC5314	1182083	G	C	143	6	53	14								UPSTREAM:orf19.4051-P	2	NOISE
Ca21chr5_C_albicans_SC5314	1182303	T	A	130	7	114	21	orf19.4054	CTA24	orf19.11536|IPF23289.1|IPF7233.2|Contig4-2715_0005|orf6.1799|orf6.4420|CA2495|TLO12|CaO19.4054|CTA213|CaO19.11536	ORF|Uncharacterized	Putative transcriptional activator, downregulated by Efg1p; member of a family of telomere-proximal genes; transcription is upregulated in an RHE model of oral candidiasis	F209I	T624A	orf19.4054-P	2	NOISE
Ca21chr5_C_albicans_SC5314	1182727	C	T	134	6	114	14	orf19.4054	CTA24	orf19.11536|IPF23289.1|IPF7233.2|Contig4-2715_0005|orf6.1799|orf6.4420|CA2495|TLO12|CaO19.4054|CTA213|CaO19.11536	ORF|Uncharacterized	Putative transcriptional activator, downregulated by Efg1p; member of a family of telomere-proximal genes; transcription is upregulated in an RHE model of oral candidiasis	T67T	C200T	orf19.4054-P	2	NOISE
Ca21chr6_C_albicans_SC5314	10304	G	T	122	3	60	8	orf19.6329		IPF5723.1|IPF5720.1|Contig4-2795_0003|Contig4-2795_0004|orf6.5522|orf6.5529|CA3295|CaO19.6329|IPF5723|CA3296|IPF5723.exon2|IPF5723.exon1	ORF|Uncharacterized	Predicted ORF in Assemblies 19, 20 and 21; opaque-specific transcription; fluconazole-downregulated; greater mRNA abundance in a cyr1 homozygous null mutant than in wild type	E350*	G1047T	orf19.6329-P	2	NOISE
Ca21chr6_C_albicans_SC5314	10586	A	C	115	2	49	7	orf19.6329		IPF5723.1|IPF5720.1|Contig4-2795_0003|Contig4-2795_0004|orf6.5522|orf6.5529|CA3295|CaO19.6329|IPF5723|CA3296|IPF5723.exon2|IPF5723.exon1	ORF|Uncharacterized	Predicted ORF in Assemblies 19, 20 and 21; opaque-specific transcription; fluconazole-downregulated; greater mRNA abundance in a cyr1 homozygous null mutant than in wild type	I256L	A765C	orf19.6329-P	2	NOISE
Ca21chr6_C_albicans_SC5314	21421	A	G	75	54	44	89	orf19.1178		orf19.8768|IPF18909.2|IPF15133.2|Contig4-2980_0001|orf6.1743|orf6.818|CA6185|CaO19.1178|IPF15133	ORF|Uncharacterized	Putative transcription factor with bZIP DNA-binding motif; Hap43p-repressed gene	S35S	A104G	orf19.1178-P	2	NOISE
Ca21chr6_C_albicans_SC5314	21456	C	G	69	52	47	95	orf19.1178		orf19.8768|IPF18909.2|IPF15133.2|Contig4-2980_0001|orf6.1743|orf6.818|CA6185|CaO19.1178|IPF15133	ORF|Uncharacterized	Putative transcription factor with bZIP DNA-binding motif; Hap43p-repressed gene	Q24E	C69G	orf19.1178-P	2	NOISE
Ca21chr6_C_albicans_SC5314	22476	C	T	70	64	39	80	orf19.1177		orf19.8769|IPF26139.1|IPF15134.2|Contig4-2980_0004|orf6.1744|orf6.817|CA0192|RTT106|CaO19.1177|IPF15134	ORF|Uncharacterized	Ortholog of S. cerevisiae RTT106; Hap43p-repressed gene	H287H	C860T	orf19.1177-P	2	NOISE
Ca21chr6_C_albicans_SC5314	22521	T	C	80	68	32	87	orf19.1177		orf19.8769|IPF26139.1|IPF15134.2|Contig4-2980_0004|orf6.1744|orf6.817|CA0192|RTT106|CaO19.1177|IPF15134	ORF|Uncharacterized	Ortholog of S. cerevisiae RTT106; Hap43p-repressed gene	S302S	T905C	orf19.1177-P	2	NOISE
Ca21chr6_C_albicans_SC5314	60031	A	G	53	49	26	57								UPSTREAM:orf19.1195-P	2	NOISE
Ca21chr6_C_albicans_SC5314	60034	A	G	54	49	25	58								UPSTREAM:orf19.1195-P	2	NOISE
Ca21chr6_C_albicans_SC5314	64348	A	G	49	52	16	43								UPSTREAM:orf19.1198-P	2	NOISE
Ca21chr6_C_albicans_SC5314	64359	G	A	48	51	18	43								UPSTREAM:orf19.1198-P	2	NOISE
Ca21chr6_C_albicans_SC5314	76187	G	A	67	73	27	59								UPSTREAM:orf19.1204-P	2	NOISE
Ca21chr6_C_albicans_SC5314	76679	G	A	55	74	23	58								UPSTREAM:orf19.1204-P	2	NOISE
Ca21chr6_C_albicans_SC5314	95965	T	A	65	78	31	73	orf19.4208	RAD52	orf19.11684|IPF23060.1|IPF7833.2|Contig4-2854_0016|orf6.5013|CA2927|CaO19.4208|CaO19.11684	ORF|Verified	Required for homologous DNA recombination, repair of UV- or MMS-damaged DNA, telomere length, UV-induced LOH; constitutive expression, MMS-induced; weakly complements S. cerevisiae rad52 mutant; slow growth, increased white-to-opaque switch	I486N	T1456A	orf19.4208-P	2	NOISE
Ca21chr6_C_albicans_SC5314	95972	C	A	67	83	31	71	orf19.4208	RAD52	orf19.11684|IPF23060.1|IPF7833.2|Contig4-2854_0016|orf6.5013|CA2927|CaO19.4208|CaO19.11684	ORF|Verified	Required for homologous DNA recombination, repair of UV- or MMS-damaged DNA, telomere length, UV-induced LOH; constitutive expression, MMS-induced; weakly complements S. cerevisiae rad52 mutant; slow growth, increased white-to-opaque switch	R484S	C1449A	orf19.4208-P	2	NOISE
Ca21chr6_C_albicans_SC5314	102776	C	A	76	87	30	86	orf19.4203		orf19.11679|IPF23058.1|IPF7841.2|Contig4-2854_0008|orf6.5018|CA2931|NDC1|CaO19.11679|CaO19.4203|IPF7841	ORF|Uncharacterized	S. cerevisiae ortholog NDC1 has structural constituent of cytoskeleton, has role in spindle pole body duplication in nuclear envelope, nuclear pore organization and localizes to spindle pole body, NDC1 complex	L308L	C923A	orf19.4203-P	2	NOISE
Ca21chr6_C_albicans_SC5314	102968	A	C	79	77	21	54	orf19.4203		orf19.11679|IPF23058.1|IPF7841.2|Contig4-2854_0008|orf6.5018|CA2931|NDC1|CaO19.11679|CaO19.4203|IPF7841	ORF|Uncharacterized	S. cerevisiae ortholog NDC1 has structural constituent of cytoskeleton, has role in spindle pole body duplication in nuclear envelope, nuclear pore organization and localizes to spindle pole body, NDC1 complex	V372V	A1115C	orf19.4203-P	2	NOISE
Ca21chr6_C_albicans_SC5314	121185	C	T	74	58	37	76	orf19.3659		orf19.11143|IPF23639.1|IPF12272.1|Contig4-2704_0009|orf6.3302|CA1686|CaO19.11143|CaO19.3659|IPF12272	ORF|Uncharacterized	S. cerevisiae ortholog RTR1 has CTD phosphatase activity, has role in transcription from RNA polymerase II promoter, dephosphorylation of RNA polymerase II C-terminal domain and localizes to cytoplasm, nucleus	H279Y	C834T	orf19.3659-P	2	NOISE
Ca21chr6_C_albicans_SC5314	121378	T	C	72	62	32	65	orf19.3659		orf19.11143|IPF23639.1|IPF12272.1|Contig4-2704_0009|orf6.3302|CA1686|CaO19.11143|CaO19.3659|IPF12272	ORF|Uncharacterized	S. cerevisiae ortholog RTR1 has CTD phosphatase activity, has role in transcription from RNA polymerase II promoter, dephosphorylation of RNA polymerase II C-terminal domain and localizes to cytoplasm, nucleus	D214D	T641C	orf19.3659-P	2	NOISE
Ca21chr6_C_albicans_SC5314	122949	G	A	71	70	29	62	orf19.3658		orf19.11142|IPF23630.1|IPF12275.2|Contig4-2704_0008|orf6.3303|CA1687|CaO19.11142|CaO19.3658|IPF12275	ORF|Uncharacterized	S. cerevisiae ortholog YER140W has role in protein folding in endoplasmic reticulum and localizes to mitochondrion	G141G	G422A	orf19.3658-P	2	NOISE
Ca21chr6_C_albicans_SC5314	123314	C	T	81	85	38	72	orf19.3658		orf19.11142|IPF23630.1|IPF12275.2|Contig4-2704_0008|orf6.3303|CA1687|CaO19.11142|CaO19.3658|IPF12275	ORF|Uncharacterized	S. cerevisiae ortholog YER140W has role in protein folding in endoplasmic reticulum and localizes to mitochondrion	A263V	C787T	orf19.3658-P	2	NOISE
Ca21chr6_C_albicans_SC5314	131025	C	T	75	76	30	80	orf19.3653	FAT1	orf19.11137|IPF23631.1|IPF13033.1|Contig4-3041_0021|orf6.3308|CA1690|CaO19.3653|CaO19.11137	ORF|Uncharacterized	Predicted enzyme of sphingolipid biosynthesis; upregulated in biofilm	N392N	C1175T	orf19.3653-P	2	NOISE
Ca21chr6_C_albicans_SC5314	131364	A	G	82	59	24	58	orf19.3653	FAT1	orf19.11137|IPF23631.1|IPF13033.1|Contig4-3041_0021|orf6.3308|CA1690|CaO19.3653|CaO19.11137	ORF|Uncharacterized	Predicted enzyme of sphingolipid biosynthesis; upregulated in biofilm	L505L	A1514G	orf19.3653-P	2	NOISE
Ca21chr6_C_albicans_SC5314	138468	G	A	73	77	38	94	orf19.3647	SEC8	orf19.11131|IPF23650.1|IPF9686.1|Contig4-3041_0015|Contig4-3041_0016|orf6.3030|CA1495|CaO19.11131|CaO19.3647|IPF9686	ORF|Verified	Predicted subunit of the exocyst complex, involved in exocytosis; localizes to a crescent on the surface of the hyphal tip	G358S	G1071A	orf19.3647-P	2	NOISE
Ca21chr6_C_albicans_SC5314	139388	T	G	60	78	20	51	orf19.3647	SEC8	orf19.11131|IPF23650.1|IPF9686.1|Contig4-3041_0015|Contig4-3041_0016|orf6.3030|CA1495|CaO19.11131|CaO19.3647|IPF9686	ORF|Verified	Predicted subunit of the exocyst complex, involved in exocytosis; localizes to a crescent on the surface of the hyphal tip	V664V	T1991G	orf19.3647-P	2	NOISE
Ca21chr6_C_albicans_SC5314	161044	C	T	63	60	33	71	orf19.84	CAN3	orf19.11123|orf19.7729|IPF23634.1|IPF19550.1|IPF27172.1|IPF19551.1|IPF14582.1|Contig4-2119_0003|orf6.115|orf6.2072|orf19.3641	ORF|Uncharacterized	Hap43p-repressed gene; expression is regulated upon white-opaque switching	A185A	C554T	orf19.84-P	2	NOISE
Ca21chr6_C_albicans_SC5314	161047	A	T	64	59	34	69	orf19.84	CAN3	orf19.11123|orf19.7729|IPF23634.1|IPF19550.1|IPF27172.1|IPF19551.1|IPF14582.1|Contig4-2119_0003|orf6.115|orf6.2072|orf19.3641	ORF|Uncharacterized	Hap43p-repressed gene; expression is regulated upon white-opaque switching	T184T	A551T	orf19.84-P	2	NOISE
Ca21chr6_C_albicans_SC5314	174876	A	T	79	52	31	65	orf19.90		orf19.7736|IPF9592.2|IPF19136.2|Contig4-2691_0004|Contig4-2691_0007|orf6.3702|orf6.812|CA1984|CaO19.90|IPF9592	ORF|Uncharacterized	Ortholog of S. cerevisiae YFL042C	T70T	A209T	orf19.90-P	2	NOISE
Ca21chr6_C_albicans_SC5314	175197	G	A	75	84	26	78	orf19.90		orf19.7736|IPF9592.2|IPF19136.2|Contig4-2691_0004|Contig4-2691_0007|orf6.3702|orf6.812|CA1984|CaO19.90|IPF9592	ORF|Uncharacterized	Ortholog of S. cerevisiae YFL042C	K177K	G530A	orf19.90-P	2	NOISE
Ca21chr6_C_albicans_SC5314	207021	C	T	122	1	98	10	orf19.111	CAN2	orf19.7758|IPF27165.1|IPF11927.1|Contig4-2501_0008|orf6.2565|CAN1|CaO19.111|CaO19.7758|CA1191|CA1192|IPF11926|IPF11926.1	ORF|Uncharacterized	Basic amino acid permease; arginine metabolism; transcription regulated by Nrg1p, Tup1p; caspofungin and flucytosine induced; shows colony morphology-related regulation by Ssn6p; fungal-specific (no human/murine homolog); Hap43p-repressed	G245G	C734T	orf19.111-P	2	NOISE
Ca21chr6_C_albicans_SC5314	207039	T	C	132	1	89	10	orf19.111	CAN2	orf19.7758|IPF27165.1|IPF11927.1|Contig4-2501_0008|orf6.2565|CAN1|CaO19.111|CaO19.7758|CA1191|CA1192|IPF11926|IPF11926.1	ORF|Uncharacterized	Basic amino acid permease; arginine metabolism; transcription regulated by Nrg1p, Tup1p; caspofungin and flucytosine induced; shows colony morphology-related regulation by Ssn6p; fungal-specific (no human/murine homolog); Hap43p-repressed	G239G	T716C	orf19.111-P	2	NOISE
Ca21chr6_C_albicans_SC5314	220128	A	G	53	47	14	40	orf19.119		orf19.7766|IPF14764.1|IPF29956.1|Contig4-2244_0002|orf6.1442|CA0481|STE14.3f|STE14	ORF|Uncharacterized		T161A	A480G	orf19.119-P	2	NOISE
Ca21chr6_C_albicans_SC5314	220605	T	C	66	65	10	35	orf19.119		orf19.7766|IPF14764.1|IPF29956.1|Contig4-2244_0002|orf6.1442|CA0481|STE14.3f|STE14	ORF|Uncharacterized		S2P	T3C	orf19.119-P	2	NOISE
Ca21chr6_C_albicans_SC5314	226533	T	C	83	65	10	33								UPSTREAM:orf19.123-P	2	NOISE
Ca21chr6_C_albicans_SC5314	226560	C	T	79	65	11	34								UPSTREAM:orf19.123-P	2	NOISE
Ca21chr6_C_albicans_SC5314	227362	G	A	54	47	17	55	orf19.123	RCN1	orf19.7770|IPF13909.1|IPF7047.3|Contig4-2238_0001|Contig4-2900_0028|orf6.138|orf6.2608|CA1217|CaO19.123|IPF13909	ORF|Verified	Protein involved in calcineurin-dependent signaling that controls stress response and virulence; inhibits calcineurin function	G122G	G365A	orf19.123-P	2	NOISE
Ca21chr6_C_albicans_SC5314	227456	G	A	56	67	30	71	orf19.123	RCN1	orf19.7770|IPF13909.1|IPF7047.3|Contig4-2238_0001|Contig4-2900_0028|orf6.138|orf6.2608|CA1217|CaO19.123|IPF13909	ORF|Verified	Protein involved in calcineurin-dependent signaling that controls stress response and virulence; inhibits calcineurin function	V154I	G459A	orf19.123-P	2	NOISE
Ca21chr6_C_albicans_SC5314	237462	G	C	79	58	22	48	orf19.131		orf19.7777|IPF7033.2|IPF29957.1|Contig4-2900_0017|orf6.2601|CA1212|CaO19.131|BRR1|IPF7033	ORF|Uncharacterized		P117P	G350C	orf19.131-P	2	NOISE
Ca21chr6_C_albicans_SC5314	237781	T	G	68	83	28	56	orf19.131		orf19.7777|IPF7033.2|IPF29957.1|Contig4-2900_0017|orf6.2601|CA1212|CaO19.131|BRR1|IPF7033	ORF|Uncharacterized		W224G	T669G	orf19.131-P	2	NOISE
Ca21chr6_C_albicans_SC5314	254197	G	A	89	78	13	36								UPSTREAM:orf19.139-P	2	NOISE
Ca21chr6_C_albicans_SC5314	254501	C	T	74	73	15	48								UPSTREAM:orf19.139-P	2	NOISE
Ca21chr6_C_albicans_SC5314	273767	G	A	71	72	25	59								UPSTREAM:orf19.3447-P	2	NOISE
Ca21chr6_C_albicans_SC5314	273938	A	G	84	69	22	60								UPSTREAM:orf19.3447-P	2	NOISE
Ca21chr6_C_albicans_SC5314	295823	C	T	95	74	24	68	orf19.3437		orf19.10941|IPF23824.1|IPF7175.2|orf6.6468|CA4026|CaO19.10941|CaO19.3437|IPF7175	ORF|Uncharacterized		P376L	C1126T	orf19.3437-P	2	NOISE
Ca21chr6_C_albicans_SC5314	295854	A	T	105	73	26	75	orf19.3437		orf19.10941|IPF23824.1|IPF7175.2|orf6.6468|CA4026|CaO19.10941|CaO19.3437|IPF7175	ORF|Uncharacterized		G386G	A1157T	orf19.3437-P	2	NOISE
Ca21chr6_C_albicans_SC5314	304928	A	G	54	69	13	38	orf19.3433	OYE23	orf19.10937|IPF19549.2|IPF19548.1|orf6.6472|orf6.92|OYE21|EBP4|CA4030|CaO19.3433	ORF|Uncharacterized	Putative NAPDH dehydrogenase; induced by nitric oxide, benomyl; oxidative stress-induced via Cap1p; fungal-specific (no human or murine homolog); Hap43p-repressed gene	P31P	A92G	orf19.3433-P	2	NOISE
Ca21chr6_C_albicans_SC5314	305201	A	G	73	78	35	69	orf19.3433	OYE23	orf19.10937|IPF19549.2|IPF19548.1|orf6.6472|orf6.92|OYE21|EBP4|CA4030|CaO19.3433	ORF|Uncharacterized	Putative NAPDH dehydrogenase; induced by nitric oxide, benomyl; oxidative stress-induced via Cap1p; fungal-specific (no human or murine homolog); Hap43p-repressed gene	S122S	A365G	orf19.3433-P	2	NOISE
Ca21chr6_C_albicans_SC5314	306373	A	G	62	53	21	60								UPSTREAM:orf19.3432-P	2	NOISE
Ca21chr6_C_albicans_SC5314	306518	A	G	82	72	21	51								UPSTREAM:orf19.3432-P	2	NOISE
Ca21chr6_C_albicans_SC5314	315143	C	T	89	68	21	57	orf19.3431		orf19.10935|IPF23872.1|IPF19795.1|Contig4-2589_0001|Contig4-2589_0002|orf6.6474|CA4033|MIP1|CaO19.10935|CaO19.3431|IPF19795	ORF|Uncharacterized	S. cerevisiae ortholog MIP1 has DNA binding, DNA-directed DNA polymerase activity, 3'-5' exonuclease activity, has role in mitochondrial DNA replication and localizes to mitochondrion	T878I	C2632T	orf19.3431-P	2	NOISE
Ca21chr6_C_albicans_SC5314	316433	A	T	78	69	20	61	orf19.3431		orf19.10935|IPF23872.1|IPF19795.1|Contig4-2589_0001|Contig4-2589_0002|orf6.6474|CA4033|MIP1|CaO19.10935|CaO19.3431|IPF19795	ORF|Uncharacterized	S. cerevisiae ortholog MIP1 has DNA binding, DNA-directed DNA polymerase activity, 3'-5' exonuclease activity, has role in mitochondrial DNA replication and localizes to mitochondrion	H448L	A1342T	orf19.3431-P	2	NOISE
Ca21chr6_C_albicans_SC5314	322121	T	A	82	6	45	12	orf19.3429	FGR47	orf19.10933|IPF23804.1|IPF7389.2|Contig4-1688_0001|orf6.6096|CA3749|CaO19.10933|CaO19.3429|IPF7389	ORF|Verified	Protein lacking an ortholog in S. cerevisiae; transposon mutation affects filamentous growth	G781G	T2342A	orf19.3429-P	2	NOISE
Ca21chr6_C_albicans_SC5314	323768	A	T	68	54	26	65	orf19.3429	FGR47	orf19.10933|IPF23804.1|IPF7389.2|Contig4-1688_0001|orf6.6096|CA3749|CaO19.10933|CaO19.3429|IPF7389	ORF|Verified	Protein lacking an ortholog in S. cerevisiae; transposon mutation affects filamentous growth	S232S	A695T	orf19.3429-P	2	NOISE
Ca21chr6_C_albicans_SC5314	348947	G	C	73	57	26	61								UPSTREAM:orf19.3420-P	2	NOISE
Ca21chr6_C_albicans_SC5314	349779	G	A	59	55	20	48								UPSTREAM:orf19.3420-P	2	NOISE
Ca21chr6_C_albicans_SC5314	351461	C	T	82	85	20	60	orf19.3419	MAE1	orf19.10923|IPF23815.1|IPF8888.2|Contig4-2903_0008|orf6.6106|CA3757|CaO19.10923|CaO19.3419	ORF|Uncharacterized	Malic enzyme, mitochondrial; transcription regulated by Mig1p and Tup1p; shows colony morphology-related gene regulation by Ssn6p; Hap43p-repressed gene	D252D	C755T	orf19.3419-P	2	NOISE
Ca21chr6_C_albicans_SC5314	351948	G	A	74	75	46	101	orf19.3419	MAE1	orf19.10923|IPF23815.1|IPF8888.2|Contig4-2903_0008|orf6.6106|CA3757|CaO19.10923|CaO19.3419	ORF|Uncharacterized	Malic enzyme, mitochondrial; transcription regulated by Mig1p and Tup1p; shows colony morphology-related gene regulation by Ssn6p; Hap43p-repressed gene	V415I	G1242A	orf19.3419-P	2	NOISE
Ca21chr6_C_albicans_SC5314	359050	G	A	62	55	30	64	orf19.3415	PTK2	orf19.10918|IPF23808.1|IPF12448.2|Contig4-2923_0004|Contig4-2923_0005|Contig4-2923_0006|orf6.2734|orf6.6110|CA1299|CaO19.3415	ORF|Verified	Putative protein kinase of polyamine import; mutation confers hypersensitivity to high concentrations of tunicamycin; upregulated in biofilm	K521K	G1562A	orf19.3415-P	2	NOISE
Ca21chr6_C_albicans_SC5314	360282	G	A	67	73	28	85	orf19.3415	PTK2	orf19.10918|IPF23808.1|IPF12448.2|Contig4-2923_0004|Contig4-2923_0005|Contig4-2923_0006|orf6.2734|orf6.6110|CA1299|CaO19.3415	ORF|Verified	Putative protein kinase of polyamine import; mutation confers hypersensitivity to high concentrations of tunicamycin; upregulated in biofilm	V111M	G330A	orf19.3415-P	2	NOISE
Ca21chr6_C_albicans_SC5314	372492	A	G	92	89	30	68								UPSTREAM:orf19.3407-P	2	NOISE
Ca21chr6_C_albicans_SC5314	372511	T	C	97	92	26	70								UPSTREAM:orf19.3407-P	2	NOISE
Ca21chr6_C_albicans_SC5314	374492	C	T	56	54	30	66	orf19.3406		orf19.10909|IPF23830.1|IPF9898.2|Contig4-2923_0025|orf6.4325|CA2427|CaO19.3406|CaO19.10909|IPF9898	ORF|Uncharacterized	Predicted ORF in Assemblies 19, 20 and 21; member of conserved Mcm1p regulon	N373N	C1118T	orf19.3406-P	2	NOISE
Ca21chr6_C_albicans_SC5314	375556	T	G	127	1	54	9	orf19.3406		orf19.10909|IPF23830.1|IPF9898.2|Contig4-2923_0025|orf6.4325|CA2427|CaO19.3406|CaO19.10909|IPF9898	ORF|Uncharacterized	Predicted ORF in Assemblies 19, 20 and 21; member of conserved Mcm1p regulon	S19A	T54G	orf19.3406-P	2	NOISE
Ca21chr6_C_albicans_SC5314	380352	G	A	89	71	40	81	orf19.3404		orf19.10907|IPF23828.1|IPF9890.1|IPF9890|Contig4-2230_0003|Contig4-2230_0005|orf6.4327|CA2429|CaO19.10907|CaO19.3404	ORF|Uncharacterized	Decreased transcription is observed upon fluphenazine treatment	A447T	G1338A	orf19.3404-P	2	NOISE
Ca21chr6_C_albicans_SC5314	380417	G	A	89	75	35	78	orf19.3404		orf19.10907|IPF23828.1|IPF9890.1|IPF9890|Contig4-2230_0003|Contig4-2230_0005|orf6.4327|CA2429|CaO19.10907|CaO19.3404	ORF|Uncharacterized	Decreased transcription is observed upon fluphenazine treatment	L468L	G1403A	orf19.3404-P	2	NOISE
Ca21chr6_C_albicans_SC5314	381976	T	C	69	70	27	65	orf19.3401	CTA1	orf19.10904|IPF23849.1|IPF12951.2|Contig4-2399_0004|orf6.4330|CA2431|MOS10|VPS60|CaO19.10904|CaO19.3401|IPF12951	ORF|Verified	Protein similar to S. cerevisiae Mos10p, which affects S. cerevisiae filamentous growth; activates transcription in 1-hybrid assay in S. cerevisiae; protein levels increase under weak acid stress; nonessential	I23I	T68C	orf19.3401-P	2	NOISE
Ca21chr6_C_albicans_SC5314	382015	A	G	70	68	33	74	orf19.3401	CTA1	orf19.10904|IPF23849.1|IPF12951.2|Contig4-2399_0004|orf6.4330|CA2431|MOS10|VPS60|CaO19.10904|CaO19.3401|IPF12951	ORF|Verified	Protein similar to S. cerevisiae Mos10p, which affects S. cerevisiae filamentous growth; activates transcription in 1-hybrid assay in S. cerevisiae; protein levels increase under weak acid stress; nonessential	K36K	A107G	orf19.3401-P	2	NOISE
Ca21chr6_C_albicans_SC5314	391948	C	T	63	65	24	55								UPSTREAM:orf19.3393-P	2	NOISE
Ca21chr6_C_albicans_SC5314	391956	C	A	62	65	28	56								UPSTREAM:orf19.3393-P	2	NOISE
Ca21chr6_C_albicans_SC5314	393906	G	T	59	55	17	44	orf19.3391	ADK1	orf19.8301|orf19.10894|IPF23845.1|IPF20062.1|IPF26639.1|IPF20093.1|Contig4-1966_0003|Contig4-2154_0002|orf6.3696|orf6.1810|CA1982|orf19.683|ADK12|CaO19.10894|CaO19.3391	ORF|Uncharacterized	Putative adenylate kinase; decreased expression in hyphae compared to yeast; macrophage-induced protein; adenylate kinase release used as a marker for cell lysis; possibly an essential gene (UAU1 method); biofilm-induced gene	A44S	G129T	orf19.3391-P	2	NOISE
Ca21chr6_C_albicans_SC5314	394064	T	C	85	72	28	57	orf19.3391	ADK1	orf19.8301|orf19.10894|IPF23845.1|IPF20062.1|IPF26639.1|IPF20093.1|Contig4-1966_0003|Contig4-2154_0002|orf6.3696|orf6.1810|CA1982|orf19.683|ADK12|CaO19.10894|CaO19.3391	ORF|Uncharacterized	Putative adenylate kinase; decreased expression in hyphae compared to yeast; macrophage-induced protein; adenylate kinase release used as a marker for cell lysis; possibly an essential gene (UAU1 method); biofilm-induced gene	I96I	T287C	orf19.3391-P	2	NOISE
Ca21chr6_C_albicans_SC5314	403369	T	A	65	55	32	63	orf19.687.1	RPL25	IPF26650.1|IPF9581.1|Contig4-2607_0004|CA1977|RPL25.3	ORF|Uncharacterized	Putative rRNA-binding ribosomal protein component of the 60S ribosomal subunit; Hap43p-induced gene; shows colony morphology-related gene regulation by Ssn6p	Intronic	Intronic	orf19.687.1-P	2	NOISE
Ca21chr6_C_albicans_SC5314	403524	T	G	92	74	36	73	orf19.687.1	RPL25	IPF26650.1|IPF9581.1|Contig4-2607_0004|CA1977|RPL25.3	ORF|Uncharacterized	Putative rRNA-binding ribosomal protein component of the 60S ribosomal subunit; Hap43p-induced gene; shows colony morphology-related gene regulation by Ssn6p	Intronic	Intronic	orf19.687.1-P	2	NOISE
Ca21chr6_C_albicans_SC5314	412842	T	C	87	83	36	81								UPSTREAM:orf19.691-P	2	NOISE
Ca21chr6_C_albicans_SC5314	414633	C	A	129	0	31	5								UPSTREAM:orf19.691-P	2	NOISE
Ca21chr6_C_albicans_SC5314	433817	T	G	90	88	39	75								UPSTREAM:orf19.3499-P	2	NOISE
Ca21chr6_C_albicans_SC5314	434076	A	G	90	74	31	69								UPSTREAM:orf19.3499-P	2	NOISE
Ca21chr6_C_albicans_SC5314	444610	G	A	84	75	28	66								UPSTREAM:orf19.3453-P	2	NOISE
Ca21chr6_C_albicans_SC5314	444615	T	C	82	79	33	65								UPSTREAM:orf19.3453-P	2	NOISE
Ca21chr6_C_albicans_SC5314	468878	T	C	87	84	17	56	orf19.3467		orf19.10971|IPF16985.2|IPF19248.2|orf6.3770|orf6.498|CA2033|SEC27|CaO19.3467	ORF|Uncharacterized	S. cerevisiae ortholog SEC27 has role in retrograde vesicle-mediated transport, Golgi to ER, ER to Golgi vesicle-mediated transport, late endosome to vacuole transport via multivesicular body sorting pathway	I576T	T1726C	orf19.3467-P	2	NOISE
Ca21chr6_C_albicans_SC5314	469147	G	A	85	57	22	54	orf19.3467		orf19.10971|IPF16985.2|IPF19248.2|orf6.3770|orf6.498|CA2033|SEC27|CaO19.3467	ORF|Uncharacterized	S. cerevisiae ortholog SEC27 has role in retrograde vesicle-mediated transport, Golgi to ER, ER to Golgi vesicle-mediated transport, late endosome to vacuole transport via multivesicular body sorting pathway	T486T	G1457A	orf19.3467-P	2	NOISE
Ca21chr6_C_albicans_SC5314	479532	C	T	53	42	25	53	orf19.3473		orf19.10977|IPF12049.2|IPF12048.3|Contig4-2835_0023|orf6.4986|orf6.965|CA2905|CaO19.3473|IPF12049	ORF|Uncharacterized		A5V	C13T	orf19.3473-P	2	NOISE
Ca21chr6_C_albicans_SC5314	480024	T	C	134	4	98	12	orf19.3473		orf19.10977|IPF12049.2|IPF12048.3|Contig4-2835_0023|orf6.4986|orf6.965|CA2905|CaO19.3473|IPF12049	ORF|Uncharacterized		I169T	T505C	orf19.3473-P	2	NOISE
Ca21chr6_C_albicans_SC5314	496559	A	G	79	61	25	66	orf19.3481		orf19.10985|IPF23785.1|IPF15646.2|Contig4-2024_0003|orf6.4978|CA2898|CaO19.10985|CaO19.3481|IPF15646	ORF|Uncharacterized	Putative mitochondrial ATP-dependent RNA helicase of the DEAD-box family, transcription is activated in the presence of elevated CO2	I147V	A438G	orf19.3481-P	2	NOISE
Ca21chr6_C_albicans_SC5314	496561	A	G	80	61	26	66	orf19.3481		orf19.10985|IPF23785.1|IPF15646.2|Contig4-2024_0003|orf6.4978|CA2898|CaO19.10985|CaO19.3481|IPF15646	ORF|Uncharacterized	Putative mitochondrial ATP-dependent RNA helicase of the DEAD-box family, transcription is activated in the presence of elevated CO2	I147M	A440G	orf19.3481-P	2	NOISE
Ca21chr6_C_albicans_SC5314	532215	T	C	61	65	33	67								UPSTREAM:orf19.5528-P	2	NOISE
Ca21chr6_C_albicans_SC5314	532258	T	G	113	0	65	10								UPSTREAM:orf19.5528-P	2	NOISE
Ca21chr6_C_albicans_SC5314	534673	T	G	75	86	17	46								UPSTREAM:orf19.5532-P	2	NOISE
Ca21chr6_C_albicans_SC5314	535064	G	C	62	65	33	70								UPSTREAM:orf19.5532-P	2	NOISE
Ca21chr6_C_albicans_SC5314	574131	A	G	67	74	36	81	orf19.5552		orf19.12998|IPF21580.1|IPF12629.2|Contig4-2462_0013|orf6.4122|CA2285|CaO19.5552|CaO19.12998|IPF12629	ORF|Uncharacterized	S. cerevisiae ortholog CRT10 has role in regulation of transcription from RNA polymerase II promoter, global	S509S	A1526G	orf19.5552-P	2	NOISE
Ca21chr6_C_albicans_SC5314	574347	C	T	76	69	20	56	orf19.5552		orf19.12998|IPF21580.1|IPF12629.2|Contig4-2462_0013|orf6.4122|CA2285|CaO19.5552|CaO19.12998|IPF12629	ORF|Uncharacterized	S. cerevisiae ortholog CRT10 has role in regulation of transcription from RNA polymerase II promoter, global	G437G	C1310T	orf19.5552-P	2	NOISE
Ca21chr6_C_albicans_SC5314	575884	C	A	80	64	15	36								UPSTREAM:orf19.5552-P	2	NOISE
Ca21chr6_C_albicans_SC5314	575971	T	G	78	65	15	39								UPSTREAM:orf19.5552-P	2	NOISE
Ca21chr6_C_albicans_SC5314	576681	T	G	82	76	16	69	orf19.5553		orf19.12999|IPF21615.1|IPF5369.2|orf6.4123|CA2286|CaO19.5553|CaO19.12999|IPF5369	ORF|Uncharacterized	S. cerevisiae ortholog YKL069W has methionine-R-sulfoxide reductase activity, has role in cellular response to oxidative stress and localizes to cytoplasm, nucleus	G86G	T257G	orf19.5553-P	2	NOISE
Ca21chr6_C_albicans_SC5314	576708	T	C	83	81	17	67	orf19.5553		orf19.12999|IPF21615.1|IPF5369.2|orf6.4123|CA2286|CaO19.5553|CaO19.12999|IPF5369	ORF|Uncharacterized	S. cerevisiae ortholog YKL069W has methionine-R-sulfoxide reductase activity, has role in cellular response to oxidative stress and localizes to cytoplasm, nucleus	F95F	T284C	orf19.5553-P	2	NOISE
Ca21chr6_C_albicans_SC5314	600533	T	C	71	81	26	57	orf19.5566		orf19.13012|IPF21594.1|IPF5392.2|Contig4-3002_0002|Contig4-3002_0003|orf6.3245|CA1649|CaO19.13012|CaO19.5566|LAB1	ORF|Uncharacterized	S. cerevisiae ortholog AIM22 has role in protein lipoylation and localizes to mitochondrion	I267T	T799C	orf19.5566-P	2	NOISE
Ca21chr6_C_albicans_SC5314	600765	C	T	68	72	17	60	orf19.5566		orf19.13012|IPF21594.1|IPF5392.2|Contig4-3002_0002|Contig4-3002_0003|orf6.3245|CA1649|CaO19.13012|CaO19.5566|LAB1	ORF|Uncharacterized	S. cerevisiae ortholog AIM22 has role in protein lipoylation and localizes to mitochondrion	H190Y	C567T	orf19.5566-P	2	NOISE
Ca21chr6_C_albicans_SC5314	610672	T	C	75	77	33	69	orf19.5574		orf19.13020|IPF21600.1|IPF19877.1|Contig4-2518_0008|orf6.1721|CA0657|CaO19.5574|IPF19877	ORF|Uncharacterized	S. cerevisiae ortholog YGR012W localizes to mitochondrial outer membrane	N39N	T116C	orf19.5574-P	2	NOISE
Ca21chr6_C_albicans_SC5314	610679	C	T	80	78	33	66	orf19.5574		orf19.13020|IPF21600.1|IPF19877.1|Contig4-2518_0008|orf6.1721|CA0657|CaO19.5574|IPF19877	ORF|Uncharacterized	S. cerevisiae ortholog YGR012W localizes to mitochondrial outer membrane	L42L	C123T	orf19.5574-P	2	NOISE
Ca21chr6_C_albicans_SC5314	615933	T	C	70	83	33	85	orf19.5576		orf19.13022|orf19.13023|IPF21625.1|IPF16507.2|Contig4-1786_0001|orf6.1723|orf6.1724|YDR531W|CA0659|CA0660|orf19.5577|IPF16189.3f	ORF|Verified	Protein similar to S. cerevisiae Cab1p, a pantothenate kinase; transposon mutation affects filamentous growth; downregulated in core stress response	S93S	T278C	orf19.5576-P	2	NOISE
Ca21chr6_C_albicans_SC5314	615976	A	T	87	93	33	77	orf19.5576		orf19.13022|orf19.13023|IPF21625.1|IPF16507.2|Contig4-1786_0001|orf6.1723|orf6.1724|YDR531W|CA0659|CA0660|orf19.5577|IPF16189.3f	ORF|Verified	Protein similar to S. cerevisiae Cab1p, a pantothenate kinase; transposon mutation affects filamentous growth; downregulated in core stress response	N79I	A235T	orf19.5576-P	2	NOISE
Ca21chr6_C_albicans_SC5314	616750	A	T	47	45	15	39								UPSTREAM:orf19.5576-P	2	NOISE
Ca21chr6_C_albicans_SC5314	616899	G	A	53	51	28	57								UPSTREAM:orf19.5576-P	2	NOISE
Ca21chr6_C_albicans_SC5314	618408	G	A	81	67	25	65	orf19.5578		orf19.13024|IPF17542.3|IPF27975.1|orf6.1645|orf6.1725|CA0611|CaO19.5578|IPF17542|IPF17542.2	ORF|Uncharacterized		S112S	G335A	orf19.5578-P	2	NOISE
Ca21chr6_C_albicans_SC5314	618506	A	G	80	68	33	75	orf19.5578		orf19.13024|IPF17542.3|IPF27975.1|orf6.1645|orf6.1725|CA0611|CaO19.5578|IPF17542|IPF17542.2	ORF|Uncharacterized		E145G	A433G	orf19.5578-P	2	NOISE
Ca21chr6_C_albicans_SC5314	638968	A	G	86	73	25	56	orf19.5586		orf19.13033|IPF21569.1|IPF6814.1|Contig4-2830_0010|orf6.4428|CA2500|FIG4	ORF|Uncharacterized	S. cerevisiae ortholog FIG4 has phosphatidylinositol-3,5-bisphosphate 5-phosphatase activity, has role in phosphoinositide dephosphorylation and localizes to extrinsic to membrane, fungal-type vacuole membrane, PAS complex	E466E	A1397G	orf19.5586-P	2	NOISE
Ca21chr6_C_albicans_SC5314	639937	A	G	105	94	44	84	orf19.5586		orf19.13033|IPF21569.1|IPF6814.1|Contig4-2830_0010|orf6.4428|CA2500|FIG4	ORF|Uncharacterized	S. cerevisiae ortholog FIG4 has phosphatidylinositol-3,5-bisphosphate 5-phosphatase activity, has role in phosphoinositide dephosphorylation and localizes to extrinsic to membrane, fungal-type vacuole membrane, PAS complex	R143R	A428G	orf19.5586-P	2	NOISE
Ca21chr6_C_albicans_SC5314	640817	A	C	151	3	49	10	orf19.5587		orf19.13034|IPF21593.1|IPF6812.2|Contig4-2830_0011|Contig4-2830_0013|orf6.4429|CA2501|CaO19.5587|IPF6812	ORF|Uncharacterized	Putative protein of unknown function, transcription is upregulated in clinical isolates from HIV+ patients with oral candidiasis	I395L	A1182C	orf19.5587-P	2	NOISE
Ca21chr6_C_albicans_SC5314	640932	T	C	76	57	23	48	orf19.5587		orf19.13034|IPF21593.1|IPF6812.2|Contig4-2830_0011|Contig4-2830_0013|orf6.4429|CA2501|CaO19.5587|IPF6812	ORF|Uncharacterized	Putative protein of unknown function, transcription is upregulated in clinical isolates from HIV+ patients with oral candidiasis	D356D	T1067C	orf19.5587-P	2	NOISE
Ca21chr6_C_albicans_SC5314	646717	G	C	70	71	23	52								UPSTREAM:orf19.5589-P	2	NOISE
Ca21chr6_C_albicans_SC5314	646733	C	T	70	69	23	52								UPSTREAM:orf19.5589-P	2	NOISE
Ca21chr6_C_albicans_SC5314	661890	C	T	71	76	37	72								UPSTREAM:orf19.5599-P	2	NOISE
Ca21chr6_C_albicans_SC5314	661901	T	C	74	86	28	73								UPSTREAM:orf19.5599-P	2	NOISE
Ca21chr6_C_albicans_SC5314	679721	C	T	69	73	16	39	orf19.5611		orf19.13054|IPF21597.1|IPF13178.2|Contig4-2392_0005|Contig4-2392_0007|orf6.5061|CA2963|CaO19.13054|GRE21|CaO19.5611|GRP3	ORF|Uncharacterized	S. cerevisiae ortholog GRE2 has methylglyoxal reductase (NADPH-dependent) activity, 3-methylbutanal reductase activity, has role in filamentous growth, ergosterol metabolic process and localizes to cytoplasm, nucleus	N53N	C158T	orf19.5611-P	2	NOISE
Ca21chr6_C_albicans_SC5314	679976	A	G	84	70	27	56	orf19.5611		orf19.13054|IPF21597.1|IPF13178.2|Contig4-2392_0005|Contig4-2392_0007|orf6.5061|CA2963|CaO19.13054|GRE21|CaO19.5611|GRP3	ORF|Uncharacterized	S. cerevisiae ortholog GRE2 has methylglyoxal reductase (NADPH-dependent) activity, 3-methylbutanal reductase activity, has role in filamentous growth, ergosterol metabolic process and localizes to cytoplasm, nucleus	K138K	A413G	orf19.5611-P	2	NOISE
Ca21chr6_C_albicans_SC5314	684203	T	G	93	89	24	52	orf19.5612	BMT4	orf19.13055|IPF15015.2|IPF13180.3|Contig4-2391_0004|orf6.1045|orf6.5060|orf6.728|CA0276|CaO19.5612|WRY1|IPF15015	ORF|Verified	Putative beta-mannosyltransferase, required for elongation of beta-mannose chains on the acid-labile fraction of cell wall phosphopeptidomannan; 9-gene family member; regulated by Tsa1p, Tsa1Bp; biofilm-induced gene	S444S	T1331G	orf19.5612-P	2	NOISE
Ca21chr6_C_albicans_SC5314	684206	C	A	92	91	25	52	orf19.5612	BMT4	orf19.13055|IPF15015.2|IPF13180.3|Contig4-2391_0004|orf6.1045|orf6.5060|orf6.728|CA0276|CaO19.5612|WRY1|IPF15015	ORF|Verified	Putative beta-mannosyltransferase, required for elongation of beta-mannose chains on the acid-labile fraction of cell wall phosphopeptidomannan; 9-gene family member; regulated by Tsa1p, Tsa1Bp; biofilm-induced gene	T445T	C1334A	orf19.5612-P	2	NOISE
Ca21chr6_C_albicans_SC5314	697475	T	C	65	65	17	45	orf19.5621		orf19.13066|IPF19767.1|IPF27969.1|Contig4-2504_0001|Contig4-2504_0002|Contig4-2504_0009|orf6.4780|CA2757|CaO19.5621|CaO19.13066|IPF19767	ORF|Verified	Putative protein of unknown function; mutation confers hypersensitivity to amphotericin B; overlaps orf19.5621	Y857H	T2568C	orf19.5621-P	2	NOISE
Ca21chr6_C_albicans_SC5314	697539	G	A	69	77	18	44	orf19.5621		orf19.13066|IPF19767.1|IPF27969.1|Contig4-2504_0001|Contig4-2504_0002|Contig4-2504_0009|orf6.4780|CA2757|CaO19.5621|CaO19.13066|IPF19767	ORF|Verified	Putative protein of unknown function; mutation confers hypersensitivity to amphotericin B; overlaps orf19.5621	T835T	G2504A	orf19.5621-P	2	NOISE
Ca21chr6_C_albicans_SC5314	755378	G	A	83	79	38	79	orf19.5722		orf19.13145|IPF21455.1|IPF11027.2|Contig4-2277_0001|orf6.3797|CA2052|CaO19.13145|CaO19.5722|IPF11027	ORF|Uncharacterized		G89D	G265A	orf19.5722-P	2	NOISE
Ca21chr6_C_albicans_SC5314	755383	T	A	79	78	41	78	orf19.5722		orf19.13145|IPF21455.1|IPF11027.2|Contig4-2277_0001|orf6.3797|CA2052|CaO19.13145|CaO19.5722|IPF11027	ORF|Uncharacterized		A87A	T260A	orf19.5722-P	2	NOISE
Ca21chr6_C_albicans_SC5314	768296	G	A	92	77	26	62	orf19.5729	FGR17	orf19.13151|IPF21450.1|IPF13158.2|Contig4-3044_0013|orf6.4908|CA2844|YNA2|CaO19.5729|CaO19.13151|IPF13158	ORF|Verified	Putative DNA-binding transcription factor; has zinc cluster DNA-binding motif; lacks an ortholog in S. cerevisiae; transposon mutation affects filamentous growth; Hap43p-repressed gene	K150K	G449A	orf19.5729-P	2	NOISE
Ca21chr6_C_albicans_SC5314	769748	A	G	89	80	33	66	orf19.5729	FGR17	orf19.13151|IPF21450.1|IPF13158.2|Contig4-3044_0013|orf6.4908|CA2844|YNA2|CaO19.5729|CaO19.13151|IPF13158	ORF|Verified	Putative DNA-binding transcription factor; has zinc cluster DNA-binding motif; lacks an ortholog in S. cerevisiae; transposon mutation affects filamentous growth; Hap43p-repressed gene	L634L	A1901G	orf19.5729-P	2	NOISE
Ca21chr6_C_albicans_SC5314	809094	A	G	78	84	25	54	orf19.5748		orf19.13171|IPF15123.1|IPF18840.2|Contig4-2858_0008|orf6.2093|orf6.2927|CA1429|CaO19.5748|IPF15123	ORF|Uncharacterized		L29L	A86G	orf19.5748-P	2	NOISE
Ca21chr6_C_albicans_SC5314	809110	T	C	83	80	20	55	orf19.5748		orf19.13171|IPF15123.1|IPF18840.2|Contig4-2858_0008|orf6.2093|orf6.2927|CA1429|CaO19.5748|IPF15123	ORF|Uncharacterized		L35L	T102C	orf19.5748-P	2	NOISE
Ca21chr6_C_albicans_SC5314	811181	G	A	75	83	29	60	orf19.5750	SHM2	orf19.13173|orf6.2091|SHMII|IPF21460.1|IPF15120.2|Contig4-2858_0010|CA0895|CaO19.5750|CaO19.13173	ORF|Verified	Cytoplasmic serine hydroxymethyltransferase; complements glycine auxotrophy of S. cerevisiae shm1 shm2 gly1-1 triple mutant; antigenic in human; soluble protein in hyphae; farnesol-upregulated in biofilm; stationary-phase enriched protein	E344E	G1031A	orf19.5750-P	2	NOISE
Ca21chr6_C_albicans_SC5314	811313	G	A	87	81	32	92	orf19.5750	SHM2	orf19.13173|orf6.2091|SHMII|IPF21460.1|IPF15120.2|Contig4-2858_0010|CA0895|CaO19.5750|CaO19.13173	ORF|Verified	Cytoplasmic serine hydroxymethyltransferase; complements glycine auxotrophy of S. cerevisiae shm1 shm2 gly1-1 triple mutant; antigenic in human; soluble protein in hyphae; farnesol-upregulated in biofilm; stationary-phase enriched protein	T300T	G899A	orf19.5750-P	2	NOISE
Ca21chr6_C_albicans_SC5314	817328	A	C	43	38	14	40								UPSTREAM:orf19.5752-P	2	NOISE
Ca21chr6_C_albicans_SC5314	817359	A	T	33	37	4	21								UPSTREAM:orf19.5752-P	2	NOISE
Ca21chr6_C_albicans_SC5314	827009	A	T	85	1	41	6	orf19.5755		orf19.13178|IPF21462.1|IPF15067.1|Contig4-2302_0004|orf6.1302|CA0409|CaO19.13178|PHO80|CaO19.5755	ORF|Uncharacterized		Q51H	A152T	orf19.5755-P	2	NOISE
Ca21chr6_C_albicans_SC5314	828062	T	C	90	93	35	72	orf19.5755		orf19.13178|IPF21462.1|IPF15067.1|Contig4-2302_0004|orf6.1302|CA0409|CaO19.13178|PHO80|CaO19.5755	ORF|Uncharacterized		Y402Y	T1205C	orf19.5755-P	2	NOISE
Ca21chr6_C_albicans_SC5314	829085	T	C	78	61	19	45	orf19.5757		orf19.13180|IPF15065.2|IPF27936.1|Contig4-2302_0005|orf6.1304|CA0410|CaO19.5757|CaO19.13180|IPF15065	ORF|Uncharacterized	S. cerevisiae ortholog YMR178W localizes to nucleus, cytoplasm	S62S	T185C	orf19.5757-P	2	NOISE
Ca21chr6_C_albicans_SC5314	829160	G	A	61	49	24	51	orf19.5757		orf19.13180|IPF15065.2|IPF27936.1|Contig4-2302_0005|orf6.1304|CA0410|CaO19.5757|CaO19.13180|IPF15065	ORF|Uncharacterized	S. cerevisiae ortholog YMR178W localizes to nucleus, cytoplasm	G37G	G110A	orf19.5757-P	2	NOISE
Ca21chr6_C_albicans_SC5314	846654	G	A	83	61	22	101	orf19.5765		orf19.13188|IPF6983.2|IPF10651.2|Contig4-3026_0018|orf6.586|orf6.6193|CA3823|CaO19.5765|IPF10651	ORF|Uncharacterized	S. cerevisiae ortholog NUP82 has role in mRNA export from nucleus and localizes to Nup82 complex	V103I	G306A	orf19.5765-P	2	NOISE
Ca21chr6_C_albicans_SC5314	846746	G	A	81	58	32	64	orf19.5765		orf19.13188|IPF6983.2|IPF10651.2|Contig4-3026_0018|orf6.586|orf6.6193|CA3823|CaO19.5765|IPF10651	ORF|Uncharacterized	S. cerevisiae ortholog NUP82 has role in mRNA export from nucleus and localizes to Nup82 complex	K133K	G398A	orf19.5765-P	2	NOISE
Ca21chr6_C_albicans_SC5314	859292	T	C	82	85	27	60	orf19.5773		orf19.13195|IPF21448.1|IPF6995.2|Contig4-3026_0008|orf6.6185|CA3818|CaO19.5773|CaO19.13195|IPF6695	ORF|Uncharacterized	Putative dipeptidyl-peptidase III; protein detected by mass spec in exponential and stationary phase cultures; Hog1p-induced; clade-associated gene expression	A574A	T1721C	orf19.5773-P	2	NOISE
Ca21chr6_C_albicans_SC5314	859376	C	T	85	79	21	61	orf19.5773		orf19.13195|IPF21448.1|IPF6995.2|Contig4-3026_0008|orf6.6185|CA3818|CaO19.5773|CaO19.13195|IPF6695	ORF|Uncharacterized	Putative dipeptidyl-peptidase III; protein detected by mass spec in exponential and stationary phase cultures; Hog1p-induced; clade-associated gene expression	D602D	C1805T	orf19.5773-P	2	NOISE
Ca21chr6_C_albicans_SC5314	884951	G	T	102	4	42	6	orf19.1215		orf19.8803|IPF9510.2|IPF29538.1|Contig4-2370_0003|Contig4-2370_0004|orf6.3082|CA1533|CaO19.8803|CaO19.1215|IPF9510	ORF|Uncharacterized		T230T	G689T	orf19.1215-P	2	NOISE
Ca21chr6_C_albicans_SC5314	885113	C	T	59	67	22	57	orf19.1215		orf19.8803|IPF9510.2|IPF29538.1|Contig4-2370_0003|Contig4-2370_0004|orf6.3082|CA1533|CaO19.8803|CaO19.1215|IPF9510	ORF|Uncharacterized		S176S	C527T	orf19.1215-P	2	NOISE
Ca21chr6_C_albicans_SC5314	914210	A	G	84	82	22	51	orf19.76	SPB1	orf19.7727|IPF19691.1|IPF13820.3|Contig4-2587_0002|orf6.1369|orf6.267|CA0443|CaO19.76	ORF|Uncharacterized	Putative AdoMet-dependent methyltransferase; Hap43p-induced gene; decreased expression in response to prostaglandins; possibly an essential gene, disruptants not obtained by UAU1 method	L705L	A2114G	orf19.76-P	2	NOISE
Ca21chr6_C_albicans_SC5314	915439	C	G	153	14	63	15	orf19.76	SPB1	orf19.7727|IPF19691.1|IPF13820.3|Contig4-2587_0002|orf6.1369|orf6.267|CA0443|CaO19.76	ORF|Uncharacterized	Putative AdoMet-dependent methyltransferase; Hap43p-induced gene; decreased expression in response to prostaglandins; possibly an essential gene, disruptants not obtained by UAU1 method	H296D	C885G	orf19.76-P	2	NOISE
Ca21chr6_C_albicans_SC5314	934219	A	G	114	8	43	7	orf19.1080		orf19.8681|IPF26225.1|IPF16291.2|Contig4-1486_0005|orf6.2150|CA0936|IPF16291	ORF|Uncharacterized		Q29Q	A86G	orf19.1080-P	2	NOISE
Ca21chr6_C_albicans_SC5314	935170	C	T	85	72	26	79	orf19.1080		orf19.8681|IPF26225.1|IPF16291.2|Contig4-1486_0005|orf6.2150|CA0936|IPF16291	ORF|Uncharacterized		G346G	C1037T	orf19.1080-P	2	NOISE
Ca21chr6_C_albicans_SC5314	936365	C	T	86	90	27	64	orf19.1082		orf19.8683|orf6.1531|orf6.2152|CA0937|CaO19.1082|IPF19892|IPF19892.1	ORF|Uncharacterized		A48V	C142T	orf19.1082-P	2	NOISE
Ca21chr6_C_albicans_SC5314	936585	C	T	93	79	26	67	orf19.1082		orf19.8683|orf6.1531|orf6.2152|CA0937|CaO19.1082|IPF19892|IPF19892.1	ORF|Uncharacterized		N121N	C362T	orf19.1082-P	2	NOISE
Ca21chr6_C_albicans_SC5314	936760	G	A	81	85	35	75								UPSTREAM:orf19.1082.1-P	2	NOISE
Ca21chr6_C_albicans_SC5314	936890	A	T	117	5	39	7								UPSTREAM:orf19.1082.1-P	2	NOISE
Ca21chr6_C_albicans_SC5314	946654	T	A	72	54	27	55								UPSTREAM:orf19.1085-P	2	NOISE
Ca21chr6_C_albicans_SC5314	946655	T	C	75	51	25	55								UPSTREAM:orf19.1085-P	2	NOISE
Ca21chr6_C_albicans_SC5314	953366	C	T	26	27	19	50								UPSTREAM:orf19.1089-P	2	NOISE
Ca21chr6_C_albicans_SC5314	953374	T	C	16	19	18	45								UPSTREAM:orf19.1089-P	2	NOISE
Ca21chr6_C_albicans_SC5314	965644	C	T	75	73	27	76	orf19.1095		orf19.8697|IPF26226.1|IPF10209.2|Contig4-2338_0010|orf6.3002|CA1475|CaO19.1095|GLE2|CaO19.8697	ORF|Uncharacterized	Putative nuclear pore complex; possibly an essential gene, disruptants not obtained by UAU1 method	F50F	C149T	orf19.1095-P	2	NOISE
Ca21chr6_C_albicans_SC5314	965754	T	G	118	0	66	8	orf19.1095		orf19.8697|IPF26226.1|IPF10209.2|Contig4-2338_0010|orf6.3002|CA1475|CaO19.1095|GLE2|CaO19.8697	ORF|Uncharacterized	Putative nuclear pore complex; possibly an essential gene, disruptants not obtained by UAU1 method	S14A	T39G	orf19.1095-P	2	NOISE
Ca21chr6_C_albicans_SC5314	968473	G	A	79	84	13	38	orf19.1096		orf19.8698|IPF26218.1|IPF10208.2|Contig4-2338_0007|orf6.3001|CA1474|CaO19.8698|GEF13|CaO19.1096|IPF10208	ORF|Uncharacterized		S798N	G2392A	orf19.1096-P	2	NOISE
Ca21chr6_C_albicans_SC5314	968480	T	A	79	79	15	37	orf19.1096		orf19.8698|IPF26218.1|IPF10208.2|Contig4-2338_0007|orf6.3001|CA1474|CaO19.8698|GEF13|CaO19.1096|IPF10208	ORF|Uncharacterized		I800I	T2399A	orf19.1096-P	2	NOISE
Ca21chr6_C_albicans_SC5314	988225	T	C	71	69	37	73	orf19.2127	CST5	orf19.9674|IPF25189.1|IPF16108.2|Contig4-1925_0003|orf6.5360|orf6.5361|orf19.2126|CaO19.2127	ORF|Verified	Scaffold protein for the mitogen-activated protein (MAP) kinase cascade that regulates mating; required for opaque mating or white biofilm formation in response to mating pheromone; induced in response to pheromone; Hap43p-repressed	S108S	T323C	orf19.2127-P	2	NOISE
Ca21chr6_C_albicans_SC5314	988342	T	C	74	51	36	75	orf19.2127	CST5	orf19.9674|IPF25189.1|IPF16108.2|Contig4-1925_0003|orf6.5360|orf6.5361|orf19.2126|CaO19.2127	ORF|Verified	Scaffold protein for the mitogen-activated protein (MAP) kinase cascade that regulates mating; required for opaque mating or white biofilm formation in response to mating pheromone; induced in response to pheromone; Hap43p-repressed	V147V	T440C	orf19.2127-P	2	NOISE
Ca21chr6_C_albicans_SC5314	991497	C	A	52	59	33	64	orf19.2129		orf19.9676|IPF25177.1|IPF19786.1|Contig4-1925_0002|Contig4-1925_0005|orf6.5363|SPO71|CaO19.9676|CaO19.2129	ORF|Uncharacterized	Predicted ORF in Assemblies 19, 20 and 21; possibly an essential gene, disruptants not obtained by UAU1 method	C14*	C41A	orf19.2129-P	2	NOISE
[truncated: 10,795 more rows]

## Sheet: Ca-F-5
chrom	position	ref_base	var_base	normal_counts_a	normal_counts_b	mutant_counts_a	mutant_counts_b	featureName	geneName	aliases	featureType	description	peptide change	nucleotide change	feature name	#SNVs/gene (including noise)	Genotype
[truncated: 1,228 more rows]

[truncated: 4 more sheets: Ca-F-6, Ca-F-7, Ca-F-8, Ca-F-9]
