# Supplementary material for: Genetic and Genomic Architecture of the Evolution of Resistance to Antifungal Drug Combinations
Source: PLoS Genet. 2013 Apr 4;9(4):e1003390. doi: 10.1371/journal.pgen.1003390 (PMC3617151; doi:10.1371/journal.pgen.1003390)
Supplement: Table S8 — Comparison of two sequence runs of the ancestral C. albicans strain CaLC660. (XLSX) [file pgen.1003390.s010.xlsx]

## Sheet: Calculations
NEW		OLD
Chromosome	SNP coordinate	Chromosome	SNP coordinate	NEW ID	OLD ID				BOTH?			is N/A?
Ca21chr1_C_albicans_SC5314	43483	Ca21chr1_C_albicans_SC5314	43483	Ca21chr1_C_albicans_SC531443483	Ca21chr1_C_albicans_SC531443483				Ca21chr1_C_albicans_SC531443483			FALSE	Total absent	50
Ca21chr1_C_albicans_SC5314	43503	Ca21chr1_C_albicans_SC5314	43503	Ca21chr1_C_albicans_SC531443503	Ca21chr1_C_albicans_SC531443503				Ca21chr1_C_albicans_SC531443503			FALSE	Total SNV	3748
Ca21chr1_C_albicans_SC5314	44018	Ca21chr1_C_albicans_SC5314	44018	Ca21chr1_C_albicans_SC531444018	Ca21chr1_C_albicans_SC531444018				Ca21chr1_C_albicans_SC531444018			FALSE	% identical	99.9867
Ca21chr1_C_albicans_SC5314	44043	Ca21chr1_C_albicans_SC5314	44043	Ca21chr1_C_albicans_SC531444043	Ca21chr1_C_albicans_SC531444043				Ca21chr1_C_albicans_SC531444043			FALSE
Ca21chr1_C_albicans_SC5314	80145	Ca21chr1_C_albicans_SC5314	80145	Ca21chr1_C_albicans_SC531480145	Ca21chr1_C_albicans_SC531480145				Ca21chr1_C_albicans_SC531480145			FALSE
Ca21chr1_C_albicans_SC5314	151586	Ca21chr1_C_albicans_SC5314	151586	Ca21chr1_C_albicans_SC5314151586	Ca21chr1_C_albicans_SC5314151586				Ca21chr1_C_albicans_SC5314151586			FALSE
Ca21chr1_C_albicans_SC5314	151589	Ca21chr1_C_albicans_SC5314	151589	Ca21chr1_C_albicans_SC5314151589	Ca21chr1_C_albicans_SC5314151589				Ca21chr1_C_albicans_SC5314151589			FALSE
Ca21chr1_C_albicans_SC5314	151606	Ca21chr1_C_albicans_SC5314	151606	Ca21chr1_C_albicans_SC5314151606	Ca21chr1_C_albicans_SC5314151606				Ca21chr1_C_albicans_SC5314151606			FALSE
Ca21chr1_C_albicans_SC5314	170771	Ca21chr1_C_albicans_SC5314	170771	Ca21chr1_C_albicans_SC5314170771	Ca21chr1_C_albicans_SC5314170771				Ca21chr1_C_albicans_SC5314170771			FALSE
Ca21chr1_C_albicans_SC5314	170894	Ca21chr1_C_albicans_SC5314	170894	Ca21chr1_C_albicans_SC5314170894	Ca21chr1_C_albicans_SC5314170894				Ca21chr1_C_albicans_SC5314170894			FALSE
Ca21chr1_C_albicans_SC5314	280688	Ca21chr1_C_albicans_SC5314	280688	Ca21chr1_C_albicans_SC5314280688	Ca21chr1_C_albicans_SC5314280688				Ca21chr1_C_albicans_SC5314280688			FALSE
Ca21chr1_C_albicans_SC5314	300374	Ca21chr1_C_albicans_SC5314	300374	Ca21chr1_C_albicans_SC5314300374	Ca21chr1_C_albicans_SC5314300374				Ca21chr1_C_albicans_SC5314300374			FALSE
Ca21chr1_C_albicans_SC5314	300375	Ca21chr1_C_albicans_SC5314	300375	Ca21chr1_C_albicans_SC5314300375	Ca21chr1_C_albicans_SC5314300375				Ca21chr1_C_albicans_SC5314300375			FALSE
Ca21chr1_C_albicans_SC5314	327106	Ca21chr1_C_albicans_SC5314	327106	Ca21chr1_C_albicans_SC5314327106	Ca21chr1_C_albicans_SC5314327106				Ca21chr1_C_albicans_SC5314327106			FALSE
Ca21chr1_C_albicans_SC5314	327107	Ca21chr1_C_albicans_SC5314	327107	Ca21chr1_C_albicans_SC5314327107	Ca21chr1_C_albicans_SC5314327107				Ca21chr1_C_albicans_SC5314327107			FALSE
Ca21chr1_C_albicans_SC5314	327108	Ca21chr1_C_albicans_SC5314	327108	Ca21chr1_C_albicans_SC5314327108	Ca21chr1_C_albicans_SC5314327108				Ca21chr1_C_albicans_SC5314327108			FALSE
Ca21chr1_C_albicans_SC5314	327211	Ca21chr1_C_albicans_SC5314	327211	Ca21chr1_C_albicans_SC5314327211	Ca21chr1_C_albicans_SC5314327211				Ca21chr1_C_albicans_SC5314327211			FALSE
Ca21chr1_C_albicans_SC5314	327224	Ca21chr1_C_albicans_SC5314	327224	Ca21chr1_C_albicans_SC5314327224	Ca21chr1_C_albicans_SC5314327224				Ca21chr1_C_albicans_SC5314327224			FALSE
Ca21chr1_C_albicans_SC5314	327255	Ca21chr1_C_albicans_SC5314	327255	Ca21chr1_C_albicans_SC5314327255	Ca21chr1_C_albicans_SC5314327255				Ca21chr1_C_albicans_SC5314327255			FALSE
Ca21chr1_C_albicans_SC5314	327290	Ca21chr1_C_albicans_SC5314	327290	Ca21chr1_C_albicans_SC5314327290	Ca21chr1_C_albicans_SC5314327290				Ca21chr1_C_albicans_SC5314327290			FALSE
Ca21chr1_C_albicans_SC5314	327321	Ca21chr1_C_albicans_SC5314	327321	Ca21chr1_C_albicans_SC5314327321	Ca21chr1_C_albicans_SC5314327321				Ca21chr1_C_albicans_SC5314327321			FALSE
Ca21chr1_C_albicans_SC5314	337595	Ca21chr1_C_albicans_SC5314	337548	Ca21chr1_C_albicans_SC5314337595	Ca21chr1_C_albicans_SC5314337548				Ca21chr1_C_albicans_SC5314337595			FALSE
Ca21chr1_C_albicans_SC5314	337599	Ca21chr1_C_albicans_SC5314	337595	Ca21chr1_C_albicans_SC5314337599	Ca21chr1_C_albicans_SC5314337595				Ca21chr1_C_albicans_SC5314337599			FALSE
Ca21chr1_C_albicans_SC5314	337601	Ca21chr1_C_albicans_SC5314	337599	Ca21chr1_C_albicans_SC5314337601	Ca21chr1_C_albicans_SC5314337599				Ca21chr1_C_albicans_SC5314337601			FALSE
Ca21chr1_C_albicans_SC5314	337605	Ca21chr1_C_albicans_SC5314	337601	Ca21chr1_C_albicans_SC5314337605	Ca21chr1_C_albicans_SC5314337601				Ca21chr1_C_albicans_SC5314337605			FALSE
Ca21chr1_C_albicans_SC5314	365685	Ca21chr1_C_albicans_SC5314	337605	Ca21chr1_C_albicans_SC5314365685	Ca21chr1_C_albicans_SC5314337605				Ca21chr1_C_albicans_SC5314365685			FALSE
Ca21chr1_C_albicans_SC5314	365703	Ca21chr1_C_albicans_SC5314	365685	Ca21chr1_C_albicans_SC5314365703	Ca21chr1_C_albicans_SC5314365685				Ca21chr1_C_albicans_SC5314365703			FALSE
Ca21chr1_C_albicans_SC5314	365827	Ca21chr1_C_albicans_SC5314	365703	Ca21chr1_C_albicans_SC5314365827	Ca21chr1_C_albicans_SC5314365703				Ca21chr1_C_albicans_SC5314365827			FALSE
Ca21chr1_C_albicans_SC5314	365837	Ca21chr1_C_albicans_SC5314	365827	Ca21chr1_C_albicans_SC5314365837	Ca21chr1_C_albicans_SC5314365827				Ca21chr1_C_albicans_SC5314365837			FALSE
Ca21chr1_C_albicans_SC5314	368392	Ca21chr1_C_albicans_SC5314	365837	Ca21chr1_C_albicans_SC5314368392	Ca21chr1_C_albicans_SC5314365837				Ca21chr1_C_albicans_SC5314368392			FALSE
Ca21chr1_C_albicans_SC5314	373405	Ca21chr1_C_albicans_SC5314	368392	Ca21chr1_C_albicans_SC5314373405	Ca21chr1_C_albicans_SC5314368392				Ca21chr1_C_albicans_SC5314373405			FALSE
Ca21chr1_C_albicans_SC5314	398627	Ca21chr1_C_albicans_SC5314	373405	Ca21chr1_C_albicans_SC5314398627	Ca21chr1_C_albicans_SC5314373405				Ca21chr1_C_albicans_SC5314398627			FALSE
Ca21chr1_C_albicans_SC5314	398734	Ca21chr1_C_albicans_SC5314	398627	Ca21chr1_C_albicans_SC5314398734	Ca21chr1_C_albicans_SC5314398627				Ca21chr1_C_albicans_SC5314398734			FALSE
Ca21chr1_C_albicans_SC5314	477378	Ca21chr1_C_albicans_SC5314	398734	Ca21chr1_C_albicans_SC5314477378	Ca21chr1_C_albicans_SC5314398734				Ca21chr1_C_albicans_SC5314477378			FALSE
Ca21chr1_C_albicans_SC5314	477476	Ca21chr1_C_albicans_SC5314	477378	Ca21chr1_C_albicans_SC5314477476	Ca21chr1_C_albicans_SC5314477378				Ca21chr1_C_albicans_SC5314477476			FALSE
Ca21chr1_C_albicans_SC5314	477519	Ca21chr1_C_albicans_SC5314	477476	Ca21chr1_C_albicans_SC5314477519	Ca21chr1_C_albicans_SC5314477476				Ca21chr1_C_albicans_SC5314477519			FALSE
Ca21chr1_C_albicans_SC5314	483579	Ca21chr1_C_albicans_SC5314	477519	Ca21chr1_C_albicans_SC5314483579	Ca21chr1_C_albicans_SC5314477519				Ca21chr1_C_albicans_SC5314483579			FALSE
Ca21chr1_C_albicans_SC5314	483581	Ca21chr1_C_albicans_SC5314	483579	Ca21chr1_C_albicans_SC5314483581	Ca21chr1_C_albicans_SC5314483579				Ca21chr1_C_albicans_SC5314483581			FALSE
Ca21chr1_C_albicans_SC5314	485450	Ca21chr1_C_albicans_SC5314	483581	Ca21chr1_C_albicans_SC5314485450	Ca21chr1_C_albicans_SC5314483581				Ca21chr1_C_albicans_SC5314485450			FALSE
Ca21chr1_C_albicans_SC5314	485534	Ca21chr1_C_albicans_SC5314	485383	Ca21chr1_C_albicans_SC5314485534	Ca21chr1_C_albicans_SC5314485383				Ca21chr1_C_albicans_SC5314485534			FALSE
Ca21chr1_C_albicans_SC5314	485536	Ca21chr1_C_albicans_SC5314	485450	Ca21chr1_C_albicans_SC5314485536	Ca21chr1_C_albicans_SC5314485450				Ca21chr1_C_albicans_SC5314485536			FALSE
Ca21chr1_C_albicans_SC5314	485537	Ca21chr1_C_albicans_SC5314	485534	Ca21chr1_C_albicans_SC5314485537	Ca21chr1_C_albicans_SC5314485534				Ca21chr1_C_albicans_SC5314485537			FALSE
Ca21chr1_C_albicans_SC5314	485560	Ca21chr1_C_albicans_SC5314	485536	Ca21chr1_C_albicans_SC5314485560	Ca21chr1_C_albicans_SC5314485536				Ca21chr1_C_albicans_SC5314485560			FALSE
Ca21chr1_C_albicans_SC5314	485627	Ca21chr1_C_albicans_SC5314	485537	Ca21chr1_C_albicans_SC5314485627	Ca21chr1_C_albicans_SC5314485537				Ca21chr1_C_albicans_SC5314485627			FALSE
Ca21chr1_C_albicans_SC5314	521734	Ca21chr1_C_albicans_SC5314	485560	Ca21chr1_C_albicans_SC5314521734	Ca21chr1_C_albicans_SC5314485560				Ca21chr1_C_albicans_SC5314521734			FALSE
Ca21chr1_C_albicans_SC5314	533354	Ca21chr1_C_albicans_SC5314	485627	Ca21chr1_C_albicans_SC5314533354	Ca21chr1_C_albicans_SC5314485627				Ca21chr1_C_albicans_SC5314533354			FALSE
Ca21chr1_C_albicans_SC5314	533413	Ca21chr1_C_albicans_SC5314	521734	Ca21chr1_C_albicans_SC5314533413	Ca21chr1_C_albicans_SC5314521734				Ca21chr1_C_albicans_SC5314533413			FALSE
Ca21chr1_C_albicans_SC5314	533432	Ca21chr1_C_albicans_SC5314	533354	Ca21chr1_C_albicans_SC5314533432	Ca21chr1_C_albicans_SC5314533354				Ca21chr1_C_albicans_SC5314533432			FALSE
Ca21chr1_C_albicans_SC5314	584499	Ca21chr1_C_albicans_SC5314	533413	Ca21chr1_C_albicans_SC5314584499	Ca21chr1_C_albicans_SC5314533413				Ca21chr1_C_albicans_SC5314584499			FALSE
Ca21chr1_C_albicans_SC5314	584500	Ca21chr1_C_albicans_SC5314	533432	Ca21chr1_C_albicans_SC5314584500	Ca21chr1_C_albicans_SC5314533432				Ca21chr1_C_albicans_SC5314584500			FALSE
Ca21chr1_C_albicans_SC5314	584516	Ca21chr1_C_albicans_SC5314	584499	Ca21chr1_C_albicans_SC5314584516	Ca21chr1_C_albicans_SC5314584499				Ca21chr1_C_albicans_SC5314584516			FALSE
Ca21chr1_C_albicans_SC5314	584517	Ca21chr1_C_albicans_SC5314	584500	Ca21chr1_C_albicans_SC5314584517	Ca21chr1_C_albicans_SC5314584500				Ca21chr1_C_albicans_SC5314584517			FALSE
Ca21chr1_C_albicans_SC5314	584525	Ca21chr1_C_albicans_SC5314	584516	Ca21chr1_C_albicans_SC5314584525	Ca21chr1_C_albicans_SC5314584516				Ca21chr1_C_albicans_SC5314584525			FALSE
Ca21chr1_C_albicans_SC5314	593911	Ca21chr1_C_albicans_SC5314	584517	Ca21chr1_C_albicans_SC5314593911	Ca21chr1_C_albicans_SC5314584517				Ca21chr1_C_albicans_SC5314593911			FALSE
Ca21chr1_C_albicans_SC5314	609875	Ca21chr1_C_albicans_SC5314	584525	Ca21chr1_C_albicans_SC5314609875	Ca21chr1_C_albicans_SC5314584525				Ca21chr1_C_albicans_SC5314609875			FALSE
Ca21chr1_C_albicans_SC5314	781998	Ca21chr1_C_albicans_SC5314	593911	Ca21chr1_C_albicans_SC5314781998	Ca21chr1_C_albicans_SC5314593911				Ca21chr1_C_albicans_SC5314781998			FALSE
Ca21chr1_C_albicans_SC5314	801810	Ca21chr1_C_albicans_SC5314	609875	Ca21chr1_C_albicans_SC5314801810	Ca21chr1_C_albicans_SC5314609875				Ca21chr1_C_albicans_SC5314801810			FALSE
Ca21chr1_C_albicans_SC5314	801817	Ca21chr1_C_albicans_SC5314	781998	Ca21chr1_C_albicans_SC5314801817	Ca21chr1_C_albicans_SC5314781998				Ca21chr1_C_albicans_SC5314801817			FALSE
Ca21chr1_C_albicans_SC5314	801826	Ca21chr1_C_albicans_SC5314	801810	Ca21chr1_C_albicans_SC5314801826	Ca21chr1_C_albicans_SC5314801810				Ca21chr1_C_albicans_SC5314801826			FALSE
Ca21chr1_C_albicans_SC5314	801829	Ca21chr1_C_albicans_SC5314	801817	Ca21chr1_C_albicans_SC5314801829	Ca21chr1_C_albicans_SC5314801817				Ca21chr1_C_albicans_SC5314801829			FALSE
Ca21chr1_C_albicans_SC5314	801834	Ca21chr1_C_albicans_SC5314	801826	Ca21chr1_C_albicans_SC5314801834	Ca21chr1_C_albicans_SC5314801826				Ca21chr1_C_albicans_SC5314801834			FALSE
Ca21chr1_C_albicans_SC5314	801880	Ca21chr1_C_albicans_SC5314	801829	Ca21chr1_C_albicans_SC5314801880	Ca21chr1_C_albicans_SC5314801829				Ca21chr1_C_albicans_SC5314801880			FALSE
Ca21chr1_C_albicans_SC5314	802007	Ca21chr1_C_albicans_SC5314	801834	Ca21chr1_C_albicans_SC5314802007	Ca21chr1_C_albicans_SC5314801834				Ca21chr1_C_albicans_SC5314802007			FALSE
Ca21chr1_C_albicans_SC5314	830018	Ca21chr1_C_albicans_SC5314	801880	Ca21chr1_C_albicans_SC5314830018	Ca21chr1_C_albicans_SC5314801880				Ca21chr1_C_albicans_SC5314830018			FALSE
Ca21chr1_C_albicans_SC5314	830020	Ca21chr1_C_albicans_SC5314	802007	Ca21chr1_C_albicans_SC5314830020	Ca21chr1_C_albicans_SC5314802007				Ca21chr1_C_albicans_SC5314830020			FALSE
Ca21chr1_C_albicans_SC5314	830021	Ca21chr1_C_albicans_SC5314	830018	Ca21chr1_C_albicans_SC5314830021	Ca21chr1_C_albicans_SC5314830018				Ca21chr1_C_albicans_SC5314830021			FALSE
Ca21chr1_C_albicans_SC5314	830048	Ca21chr1_C_albicans_SC5314	830020	Ca21chr1_C_albicans_SC5314830048	Ca21chr1_C_albicans_SC5314830020				Ca21chr1_C_albicans_SC5314830048			FALSE
Ca21chr1_C_albicans_SC5314	832548	Ca21chr1_C_albicans_SC5314	830021	Ca21chr1_C_albicans_SC5314832548	Ca21chr1_C_albicans_SC5314830021				Ca21chr1_C_albicans_SC5314832548			FALSE
Ca21chr1_C_albicans_SC5314	840234	Ca21chr1_C_albicans_SC5314	830048	Ca21chr1_C_albicans_SC5314840234	Ca21chr1_C_albicans_SC5314830048				Ca21chr1_C_albicans_SC5314840234			FALSE
Ca21chr1_C_albicans_SC5314	850518	Ca21chr1_C_albicans_SC5314	832548	Ca21chr1_C_albicans_SC5314850518	Ca21chr1_C_albicans_SC5314832548				Ca21chr1_C_albicans_SC5314850518			FALSE
Ca21chr1_C_albicans_SC5314	855069	Ca21chr1_C_albicans_SC5314	840234	Ca21chr1_C_albicans_SC5314855069	Ca21chr1_C_albicans_SC5314840234				#N/A			TRUE
Ca21chr1_C_albicans_SC5314	855085	Ca21chr1_C_albicans_SC5314	850518	Ca21chr1_C_albicans_SC5314855085	Ca21chr1_C_albicans_SC5314850518				#N/A			TRUE
Ca21chr1_C_albicans_SC5314	855146	Ca21chr1_C_albicans_SC5314	855146	Ca21chr1_C_albicans_SC5314855146	Ca21chr1_C_albicans_SC5314855146				Ca21chr1_C_albicans_SC5314855146			FALSE
Ca21chr1_C_albicans_SC5314	855147	Ca21chr1_C_albicans_SC5314	855147	Ca21chr1_C_albicans_SC5314855147	Ca21chr1_C_albicans_SC5314855147				Ca21chr1_C_albicans_SC5314855147			FALSE
Ca21chr1_C_albicans_SC5314	855179	Ca21chr1_C_albicans_SC5314	855179	Ca21chr1_C_albicans_SC5314855179	Ca21chr1_C_albicans_SC5314855179				Ca21chr1_C_albicans_SC5314855179			FALSE
Ca21chr1_C_albicans_SC5314	855180	Ca21chr1_C_albicans_SC5314	855180	Ca21chr1_C_albicans_SC5314855180	Ca21chr1_C_albicans_SC5314855180				Ca21chr1_C_albicans_SC5314855180			FALSE
Ca21chr1_C_albicans_SC5314	855181	Ca21chr1_C_albicans_SC5314	855181	Ca21chr1_C_albicans_SC5314855181	Ca21chr1_C_albicans_SC5314855181				Ca21chr1_C_albicans_SC5314855181			FALSE
Ca21chr1_C_albicans_SC5314	855202	Ca21chr1_C_albicans_SC5314	855202	Ca21chr1_C_albicans_SC5314855202	Ca21chr1_C_albicans_SC5314855202				Ca21chr1_C_albicans_SC5314855202			FALSE
Ca21chr1_C_albicans_SC5314	855427	Ca21chr1_C_albicans_SC5314	855992	Ca21chr1_C_albicans_SC5314855427	Ca21chr1_C_albicans_SC5314855992				#N/A			TRUE
Ca21chr1_C_albicans_SC5314	855992	Ca21chr1_C_albicans_SC5314	855993	Ca21chr1_C_albicans_SC5314855992	Ca21chr1_C_albicans_SC5314855993				Ca21chr1_C_albicans_SC5314855992			FALSE
Ca21chr1_C_albicans_SC5314	855993	Ca21chr1_C_albicans_SC5314	862572	Ca21chr1_C_albicans_SC5314855993	Ca21chr1_C_albicans_SC5314862572				Ca21chr1_C_albicans_SC5314855993			FALSE
Ca21chr1_C_albicans_SC5314	862572	Ca21chr1_C_albicans_SC5314	866448	Ca21chr1_C_albicans_SC5314862572	Ca21chr1_C_albicans_SC5314866448				Ca21chr1_C_albicans_SC5314862572			FALSE
Ca21chr1_C_albicans_SC5314	866448	Ca21chr1_C_albicans_SC5314	870104	Ca21chr1_C_albicans_SC5314866448	Ca21chr1_C_albicans_SC5314870104				Ca21chr1_C_albicans_SC5314866448			FALSE
Ca21chr1_C_albicans_SC5314	870104	Ca21chr1_C_albicans_SC5314	870107	Ca21chr1_C_albicans_SC5314870104	Ca21chr1_C_albicans_SC5314870107				Ca21chr1_C_albicans_SC5314870104			FALSE
Ca21chr1_C_albicans_SC5314	870107	Ca21chr1_C_albicans_SC5314	870115	Ca21chr1_C_albicans_SC5314870107	Ca21chr1_C_albicans_SC5314870115				Ca21chr1_C_albicans_SC5314870107			FALSE
Ca21chr1_C_albicans_SC5314	870115	Ca21chr1_C_albicans_SC5314	872699	Ca21chr1_C_albicans_SC5314870115	Ca21chr1_C_albicans_SC5314872699				Ca21chr1_C_albicans_SC5314870115			FALSE
Ca21chr1_C_albicans_SC5314	872699	Ca21chr1_C_albicans_SC5314	872741	Ca21chr1_C_albicans_SC5314872699	Ca21chr1_C_albicans_SC5314872741				Ca21chr1_C_albicans_SC5314872699			FALSE
Ca21chr1_C_albicans_SC5314	872741	Ca21chr1_C_albicans_SC5314	875084	Ca21chr1_C_albicans_SC5314872741	Ca21chr1_C_albicans_SC5314875084				Ca21chr1_C_albicans_SC5314872741			FALSE
Ca21chr1_C_albicans_SC5314	875084	Ca21chr1_C_albicans_SC5314	883224	Ca21chr1_C_albicans_SC5314875084	Ca21chr1_C_albicans_SC5314883224				Ca21chr1_C_albicans_SC5314875084			FALSE
Ca21chr1_C_albicans_SC5314	883224	Ca21chr1_C_albicans_SC5314	956393	Ca21chr1_C_albicans_SC5314883224	Ca21chr1_C_albicans_SC5314956393				Ca21chr1_C_albicans_SC5314883224			FALSE
Ca21chr1_C_albicans_SC5314	956393	Ca21chr1_C_albicans_SC5314	975103	Ca21chr1_C_albicans_SC5314956393	Ca21chr1_C_albicans_SC5314975103				Ca21chr1_C_albicans_SC5314956393			FALSE
Ca21chr1_C_albicans_SC5314	975103	Ca21chr1_C_albicans_SC5314	1008275	Ca21chr1_C_albicans_SC5314975103	Ca21chr1_C_albicans_SC53141008275				Ca21chr1_C_albicans_SC5314975103			FALSE
Ca21chr1_C_albicans_SC5314	1008275	Ca21chr1_C_albicans_SC5314	1083687	Ca21chr1_C_albicans_SC53141008275	Ca21chr1_C_albicans_SC53141083687				Ca21chr1_C_albicans_SC53141008275			FALSE
Ca21chr1_C_albicans_SC5314	1083687	Ca21chr1_C_albicans_SC5314	1097488	Ca21chr1_C_albicans_SC53141083687	Ca21chr1_C_albicans_SC53141097488				Ca21chr1_C_albicans_SC53141083687			FALSE
Ca21chr1_C_albicans_SC5314	1097488	Ca21chr1_C_albicans_SC5314	1149587	Ca21chr1_C_albicans_SC53141097488	Ca21chr1_C_albicans_SC53141149587				Ca21chr1_C_albicans_SC53141097488			FALSE
Ca21chr1_C_albicans_SC5314	1149587	Ca21chr1_C_albicans_SC5314	1149614	Ca21chr1_C_albicans_SC53141149587	Ca21chr1_C_albicans_SC53141149614				Ca21chr1_C_albicans_SC53141149587			FALSE
Ca21chr1_C_albicans_SC5314	1149614	Ca21chr1_C_albicans_SC5314	1149617	Ca21chr1_C_albicans_SC53141149614	Ca21chr1_C_albicans_SC53141149617				Ca21chr1_C_albicans_SC53141149614			FALSE
Ca21chr1_C_albicans_SC5314	1149617	Ca21chr1_C_albicans_SC5314	1149618	Ca21chr1_C_albicans_SC53141149617	Ca21chr1_C_albicans_SC53141149618				Ca21chr1_C_albicans_SC53141149617			FALSE
Ca21chr1_C_albicans_SC5314	1149618	Ca21chr1_C_albicans_SC5314	1159059	Ca21chr1_C_albicans_SC53141149618	Ca21chr1_C_albicans_SC53141159059				Ca21chr1_C_albicans_SC53141149618			FALSE
Ca21chr1_C_albicans_SC5314	1159059	Ca21chr1_C_albicans_SC5314	1166933	Ca21chr1_C_albicans_SC53141159059	Ca21chr1_C_albicans_SC53141166933				Ca21chr1_C_albicans_SC53141159059			FALSE
Ca21chr1_C_albicans_SC5314	1166933	Ca21chr1_C_albicans_SC5314	1166944	Ca21chr1_C_albicans_SC53141166933	Ca21chr1_C_albicans_SC53141166944				Ca21chr1_C_albicans_SC53141166933			FALSE
Ca21chr1_C_albicans_SC5314	1166944	Ca21chr1_C_albicans_SC5314	1167010	Ca21chr1_C_albicans_SC53141166944	Ca21chr1_C_albicans_SC53141167010				Ca21chr1_C_albicans_SC53141166944			FALSE
Ca21chr1_C_albicans_SC5314	1167010	Ca21chr1_C_albicans_SC5314	1191727	Ca21chr1_C_albicans_SC53141167010	Ca21chr1_C_albicans_SC53141191727				Ca21chr1_C_albicans_SC53141167010			FALSE
Ca21chr1_C_albicans_SC5314	1191727	Ca21chr1_C_albicans_SC5314	1195980	Ca21chr1_C_albicans_SC53141191727	Ca21chr1_C_albicans_SC53141195980				Ca21chr1_C_albicans_SC53141191727			FALSE
Ca21chr1_C_albicans_SC5314	1195980	Ca21chr1_C_albicans_SC5314	1198091	Ca21chr1_C_albicans_SC53141195980	Ca21chr1_C_albicans_SC53141198091				Ca21chr1_C_albicans_SC53141195980			FALSE
Ca21chr1_C_albicans_SC5314	1198091	Ca21chr1_C_albicans_SC5314	1198093	Ca21chr1_C_albicans_SC53141198091	Ca21chr1_C_albicans_SC53141198093				Ca21chr1_C_albicans_SC53141198091			FALSE
Ca21chr1_C_albicans_SC5314	1198093	Ca21chr1_C_albicans_SC5314	1198101	Ca21chr1_C_albicans_SC53141198093	Ca21chr1_C_albicans_SC53141198101				Ca21chr1_C_albicans_SC53141198093			FALSE
Ca21chr1_C_albicans_SC5314	1198101	Ca21chr1_C_albicans_SC5314	1198122	Ca21chr1_C_albicans_SC53141198101	Ca21chr1_C_albicans_SC53141198122				Ca21chr1_C_albicans_SC53141198101			FALSE
Ca21chr1_C_albicans_SC5314	1198122	Ca21chr1_C_albicans_SC5314	1198135	Ca21chr1_C_albicans_SC53141198122	Ca21chr1_C_albicans_SC53141198135				Ca21chr1_C_albicans_SC53141198122			FALSE
Ca21chr1_C_albicans_SC5314	1198135	Ca21chr1_C_albicans_SC5314	1206267	Ca21chr1_C_albicans_SC53141198135	Ca21chr1_C_albicans_SC53141206267				Ca21chr1_C_albicans_SC53141198135			FALSE
Ca21chr1_C_albicans_SC5314	1206267	Ca21chr1_C_albicans_SC5314	1208618	Ca21chr1_C_albicans_SC53141206267	Ca21chr1_C_albicans_SC53141208618				Ca21chr1_C_albicans_SC53141206267			FALSE
Ca21chr1_C_albicans_SC5314	1208618	Ca21chr1_C_albicans_SC5314	1237828	Ca21chr1_C_albicans_SC53141208618	Ca21chr1_C_albicans_SC53141237828				Ca21chr1_C_albicans_SC53141208618			FALSE
Ca21chr1_C_albicans_SC5314	1237828	Ca21chr1_C_albicans_SC5314	1237830	Ca21chr1_C_albicans_SC53141237828	Ca21chr1_C_albicans_SC53141237830				Ca21chr1_C_albicans_SC53141237828			FALSE
Ca21chr1_C_albicans_SC5314	1237830	Ca21chr1_C_albicans_SC5314	1254964	Ca21chr1_C_albicans_SC53141237830	Ca21chr1_C_albicans_SC53141254964				Ca21chr1_C_albicans_SC53141237830			FALSE
Ca21chr1_C_albicans_SC5314	1254964	Ca21chr1_C_albicans_SC5314	1270141	Ca21chr1_C_albicans_SC53141254964	Ca21chr1_C_albicans_SC53141270141				Ca21chr1_C_albicans_SC53141254964			FALSE
Ca21chr1_C_albicans_SC5314	1270141	Ca21chr1_C_albicans_SC5314	1277404	Ca21chr1_C_albicans_SC53141270141	Ca21chr1_C_albicans_SC53141277404				Ca21chr1_C_albicans_SC53141270141			FALSE
Ca21chr1_C_albicans_SC5314	1277404	Ca21chr1_C_albicans_SC5314	1277411	Ca21chr1_C_albicans_SC53141277404	Ca21chr1_C_albicans_SC53141277411				Ca21chr1_C_albicans_SC53141277404			FALSE
Ca21chr1_C_albicans_SC5314	1277411	Ca21chr1_C_albicans_SC5314	1277435	Ca21chr1_C_albicans_SC53141277411	Ca21chr1_C_albicans_SC53141277435				Ca21chr1_C_albicans_SC53141277411			FALSE
Ca21chr1_C_albicans_SC5314	1277435	Ca21chr1_C_albicans_SC5314	1293558	Ca21chr1_C_albicans_SC53141277435	Ca21chr1_C_albicans_SC53141293558				Ca21chr1_C_albicans_SC53141277435			FALSE
Ca21chr1_C_albicans_SC5314	1283542	Ca21chr1_C_albicans_SC5314	1293635	Ca21chr1_C_albicans_SC53141283542	Ca21chr1_C_albicans_SC53141293635				#N/A			TRUE
Ca21chr1_C_albicans_SC5314	1293558	Ca21chr1_C_albicans_SC5314	1293651	Ca21chr1_C_albicans_SC53141293558	Ca21chr1_C_albicans_SC53141293651				Ca21chr1_C_albicans_SC53141293558			FALSE
Ca21chr1_C_albicans_SC5314	1293635	Ca21chr1_C_albicans_SC5314	1293656	Ca21chr1_C_albicans_SC53141293635	Ca21chr1_C_albicans_SC53141293656				Ca21chr1_C_albicans_SC53141293635			FALSE
Ca21chr1_C_albicans_SC5314	1293651	Ca21chr1_C_albicans_SC5314	1293662	Ca21chr1_C_albicans_SC53141293651	Ca21chr1_C_albicans_SC53141293662				Ca21chr1_C_albicans_SC53141293651			FALSE
Ca21chr1_C_albicans_SC5314	1293656	Ca21chr1_C_albicans_SC5314	1315307	Ca21chr1_C_albicans_SC53141293656	Ca21chr1_C_albicans_SC53141315307				Ca21chr1_C_albicans_SC53141293656			FALSE
Ca21chr1_C_albicans_SC5314	1293662	Ca21chr1_C_albicans_SC5314	1340656	Ca21chr1_C_albicans_SC53141293662	Ca21chr1_C_albicans_SC53141340656				Ca21chr1_C_albicans_SC53141293662			FALSE
Ca21chr1_C_albicans_SC5314	1315307	Ca21chr1_C_albicans_SC5314	1346366	Ca21chr1_C_albicans_SC53141315307	Ca21chr1_C_albicans_SC53141346366				Ca21chr1_C_albicans_SC53141315307			FALSE
Ca21chr1_C_albicans_SC5314	1340656	Ca21chr1_C_albicans_SC5314	1346384	Ca21chr1_C_albicans_SC53141340656	Ca21chr1_C_albicans_SC53141346384				Ca21chr1_C_albicans_SC53141340656			FALSE
Ca21chr1_C_albicans_SC5314	1346366	Ca21chr1_C_albicans_SC5314	1346389	Ca21chr1_C_albicans_SC53141346366	Ca21chr1_C_albicans_SC53141346389				Ca21chr1_C_albicans_SC53141346366			FALSE
Ca21chr1_C_albicans_SC5314	1346384	Ca21chr1_C_albicans_SC5314	1346405	Ca21chr1_C_albicans_SC53141346384	Ca21chr1_C_albicans_SC53141346405				Ca21chr1_C_albicans_SC53141346384			FALSE
Ca21chr1_C_albicans_SC5314	1346389	Ca21chr1_C_albicans_SC5314	1360279	Ca21chr1_C_albicans_SC53141346389	Ca21chr1_C_albicans_SC53141360279				Ca21chr1_C_albicans_SC53141346389			FALSE
Ca21chr1_C_albicans_SC5314	1346405	Ca21chr1_C_albicans_SC5314	1360304	Ca21chr1_C_albicans_SC53141346405	Ca21chr1_C_albicans_SC53141360304				Ca21chr1_C_albicans_SC53141346405			FALSE
Ca21chr1_C_albicans_SC5314	1360279	Ca21chr1_C_albicans_SC5314	1360305	Ca21chr1_C_albicans_SC53141360279	Ca21chr1_C_albicans_SC53141360305				Ca21chr1_C_albicans_SC53141360279			FALSE
Ca21chr1_C_albicans_SC5314	1360304	Ca21chr1_C_albicans_SC5314	1361764	Ca21chr1_C_albicans_SC53141360304	Ca21chr1_C_albicans_SC53141361764				Ca21chr1_C_albicans_SC53141360304			FALSE
Ca21chr1_C_albicans_SC5314	1360305	Ca21chr1_C_albicans_SC5314	1361765	Ca21chr1_C_albicans_SC53141360305	Ca21chr1_C_albicans_SC53141361765				Ca21chr1_C_albicans_SC53141360305			FALSE
Ca21chr1_C_albicans_SC5314	1361764	Ca21chr1_C_albicans_SC5314	1361775	Ca21chr1_C_albicans_SC53141361764	Ca21chr1_C_albicans_SC53141361775				Ca21chr1_C_albicans_SC53141361764			FALSE
Ca21chr1_C_albicans_SC5314	1361765	Ca21chr1_C_albicans_SC5314	1365390	Ca21chr1_C_albicans_SC53141361765	Ca21chr1_C_albicans_SC53141365390				Ca21chr1_C_albicans_SC53141361765			FALSE
Ca21chr1_C_albicans_SC5314	1361775	Ca21chr1_C_albicans_SC5314	1365393	Ca21chr1_C_albicans_SC53141361775	Ca21chr1_C_albicans_SC53141365393				Ca21chr1_C_albicans_SC53141361775			FALSE
Ca21chr1_C_albicans_SC5314	1365390	Ca21chr1_C_albicans_SC5314	1365440	Ca21chr1_C_albicans_SC53141365390	Ca21chr1_C_albicans_SC53141365440				Ca21chr1_C_albicans_SC53141365390			FALSE
Ca21chr1_C_albicans_SC5314	1365393	Ca21chr1_C_albicans_SC5314	1365486	Ca21chr1_C_albicans_SC53141365393	Ca21chr1_C_albicans_SC53141365486				Ca21chr1_C_albicans_SC53141365393			FALSE
Ca21chr1_C_albicans_SC5314	1365440	Ca21chr1_C_albicans_SC5314	1365494	Ca21chr1_C_albicans_SC53141365440	Ca21chr1_C_albicans_SC53141365494				Ca21chr1_C_albicans_SC53141365440			FALSE
Ca21chr1_C_albicans_SC5314	1365486	Ca21chr1_C_albicans_SC5314	1365529	Ca21chr1_C_albicans_SC53141365486	Ca21chr1_C_albicans_SC53141365529				Ca21chr1_C_albicans_SC53141365486			FALSE
Ca21chr1_C_albicans_SC5314	1365494	Ca21chr1_C_albicans_SC5314	1365597	Ca21chr1_C_albicans_SC53141365494	Ca21chr1_C_albicans_SC53141365597				Ca21chr1_C_albicans_SC53141365494			FALSE
Ca21chr1_C_albicans_SC5314	1365529	Ca21chr1_C_albicans_SC5314	1365601	Ca21chr1_C_albicans_SC53141365529	Ca21chr1_C_albicans_SC53141365601				Ca21chr1_C_albicans_SC53141365529			FALSE
Ca21chr1_C_albicans_SC5314	1365597	Ca21chr1_C_albicans_SC5314	1365607	Ca21chr1_C_albicans_SC53141365597	Ca21chr1_C_albicans_SC53141365607				Ca21chr1_C_albicans_SC53141365597			FALSE
Ca21chr1_C_albicans_SC5314	1365601	Ca21chr1_C_albicans_SC5314	1365623	Ca21chr1_C_albicans_SC53141365601	Ca21chr1_C_albicans_SC53141365623				Ca21chr1_C_albicans_SC53141365601			FALSE
Ca21chr1_C_albicans_SC5314	1365607	Ca21chr1_C_albicans_SC5314	1365630	Ca21chr1_C_albicans_SC53141365607	Ca21chr1_C_albicans_SC53141365630				Ca21chr1_C_albicans_SC53141365607			FALSE
Ca21chr1_C_albicans_SC5314	1365630	Ca21chr1_C_albicans_SC5314	1365636	Ca21chr1_C_albicans_SC53141365630	Ca21chr1_C_albicans_SC53141365636				Ca21chr1_C_albicans_SC53141365630			FALSE
Ca21chr1_C_albicans_SC5314	1365636	Ca21chr1_C_albicans_SC5314	1365640	Ca21chr1_C_albicans_SC53141365636	Ca21chr1_C_albicans_SC53141365640				Ca21chr1_C_albicans_SC53141365636			FALSE
Ca21chr1_C_albicans_SC5314	1365640	Ca21chr1_C_albicans_SC5314	1365703	Ca21chr1_C_albicans_SC53141365640	Ca21chr1_C_albicans_SC53141365703				Ca21chr1_C_albicans_SC53141365640			FALSE
Ca21chr1_C_albicans_SC5314	1365703	Ca21chr1_C_albicans_SC5314	1365707	Ca21chr1_C_albicans_SC53141365703	Ca21chr1_C_albicans_SC53141365707				Ca21chr1_C_albicans_SC53141365703			FALSE
Ca21chr1_C_albicans_SC5314	1365707	Ca21chr1_C_albicans_SC5314	1365710	Ca21chr1_C_albicans_SC53141365707	Ca21chr1_C_albicans_SC53141365710				Ca21chr1_C_albicans_SC53141365707			FALSE
Ca21chr1_C_albicans_SC5314	1365710	Ca21chr1_C_albicans_SC5314	1420518	Ca21chr1_C_albicans_SC53141365710	Ca21chr1_C_albicans_SC53141420518				Ca21chr1_C_albicans_SC53141365710			FALSE
Ca21chr1_C_albicans_SC5314	1420518	Ca21chr1_C_albicans_SC5314	1420520	Ca21chr1_C_albicans_SC53141420518	Ca21chr1_C_albicans_SC53141420520				Ca21chr1_C_albicans_SC53141420518			FALSE
Ca21chr1_C_albicans_SC5314	1420520	Ca21chr1_C_albicans_SC5314	1428617	Ca21chr1_C_albicans_SC53141420520	Ca21chr1_C_albicans_SC53141428617				Ca21chr1_C_albicans_SC53141420520			FALSE
Ca21chr1_C_albicans_SC5314	1428617	Ca21chr1_C_albicans_SC5314	1428675	Ca21chr1_C_albicans_SC53141428617	Ca21chr1_C_albicans_SC53141428675				Ca21chr1_C_albicans_SC53141428617			FALSE
Ca21chr1_C_albicans_SC5314	1428675	Ca21chr1_C_albicans_SC5314	1432318	Ca21chr1_C_albicans_SC53141428675	Ca21chr1_C_albicans_SC53141432318				Ca21chr1_C_albicans_SC53141428675			FALSE
Ca21chr1_C_albicans_SC5314	1432318	Ca21chr1_C_albicans_SC5314	1432870	Ca21chr1_C_albicans_SC53141432318	Ca21chr1_C_albicans_SC53141432870				Ca21chr1_C_albicans_SC53141432318			FALSE
Ca21chr1_C_albicans_SC5314	1432870	Ca21chr1_C_albicans_SC5314	1432899	Ca21chr1_C_albicans_SC53141432870	Ca21chr1_C_albicans_SC53141432899				Ca21chr1_C_albicans_SC53141432870			FALSE
Ca21chr1_C_albicans_SC5314	1432899	Ca21chr1_C_albicans_SC5314	1432906	Ca21chr1_C_albicans_SC53141432899	Ca21chr1_C_albicans_SC53141432906				Ca21chr1_C_albicans_SC53141432899			FALSE
Ca21chr1_C_albicans_SC5314	1432906	Ca21chr1_C_albicans_SC5314	1432907	Ca21chr1_C_albicans_SC53141432906	Ca21chr1_C_albicans_SC53141432907				Ca21chr1_C_albicans_SC53141432906			FALSE
Ca21chr1_C_albicans_SC5314	1432907	Ca21chr1_C_albicans_SC5314	1432953	Ca21chr1_C_albicans_SC53141432907	Ca21chr1_C_albicans_SC53141432953				Ca21chr1_C_albicans_SC53141432907			FALSE
Ca21chr1_C_albicans_SC5314	1432953	Ca21chr1_C_albicans_SC5314	1432956	Ca21chr1_C_albicans_SC53141432953	Ca21chr1_C_albicans_SC53141432956				Ca21chr1_C_albicans_SC53141432953			FALSE
Ca21chr1_C_albicans_SC5314	1432956	Ca21chr1_C_albicans_SC5314	1432958	Ca21chr1_C_albicans_SC53141432956	Ca21chr1_C_albicans_SC53141432958				Ca21chr1_C_albicans_SC53141432956			FALSE
Ca21chr1_C_albicans_SC5314	1432958	Ca21chr1_C_albicans_SC5314	1432960	Ca21chr1_C_albicans_SC53141432958	Ca21chr1_C_albicans_SC53141432960				Ca21chr1_C_albicans_SC53141432958			FALSE
Ca21chr1_C_albicans_SC5314	1432960	Ca21chr1_C_albicans_SC5314	1432965	Ca21chr1_C_albicans_SC53141432960	Ca21chr1_C_albicans_SC53141432965				Ca21chr1_C_albicans_SC53141432960			FALSE
Ca21chr1_C_albicans_SC5314	1432965	Ca21chr1_C_albicans_SC5314	1432966	Ca21chr1_C_albicans_SC53141432965	Ca21chr1_C_albicans_SC53141432966				Ca21chr1_C_albicans_SC53141432965			FALSE
Ca21chr1_C_albicans_SC5314	1432966	Ca21chr1_C_albicans_SC5314	1432969	Ca21chr1_C_albicans_SC53141432966	Ca21chr1_C_albicans_SC53141432969				Ca21chr1_C_albicans_SC53141432966			FALSE
Ca21chr1_C_albicans_SC5314	1432969	Ca21chr1_C_albicans_SC5314	1432970	Ca21chr1_C_albicans_SC53141432969	Ca21chr1_C_albicans_SC53141432970				Ca21chr1_C_albicans_SC53141432969			FALSE
Ca21chr1_C_albicans_SC5314	1432970	Ca21chr1_C_albicans_SC5314	1432979	Ca21chr1_C_albicans_SC53141432970	Ca21chr1_C_albicans_SC53141432979				Ca21chr1_C_albicans_SC53141432970			FALSE
Ca21chr1_C_albicans_SC5314	1432979	Ca21chr1_C_albicans_SC5314	1460393	Ca21chr1_C_albicans_SC53141432979	Ca21chr1_C_albicans_SC53141460393				Ca21chr1_C_albicans_SC53141432979			FALSE
Ca21chr1_C_albicans_SC5314	1460393	Ca21chr1_C_albicans_SC5314	1467993	Ca21chr1_C_albicans_SC53141460393	Ca21chr1_C_albicans_SC53141467993				Ca21chr1_C_albicans_SC53141460393			FALSE
Ca21chr1_C_albicans_SC5314	1467993	Ca21chr1_C_albicans_SC5314	1498277	Ca21chr1_C_albicans_SC53141467993	Ca21chr1_C_albicans_SC53141498277				Ca21chr1_C_albicans_SC53141467993			FALSE
Ca21chr1_C_albicans_SC5314	1498264	Ca21chr1_C_albicans_SC5314	1498296	Ca21chr1_C_albicans_SC53141498264	Ca21chr1_C_albicans_SC53141498296				#N/A			TRUE
Ca21chr1_C_albicans_SC5314	1498265	Ca21chr1_C_albicans_SC5314	1498304	Ca21chr1_C_albicans_SC53141498265	Ca21chr1_C_albicans_SC53141498304				#N/A			TRUE
Ca21chr1_C_albicans_SC5314	1498277	Ca21chr1_C_albicans_SC5314	1498305	Ca21chr1_C_albicans_SC53141498277	Ca21chr1_C_albicans_SC53141498305				Ca21chr1_C_albicans_SC53141498277			FALSE
Ca21chr1_C_albicans_SC5314	1498296	Ca21chr1_C_albicans_SC5314	1498312	Ca21chr1_C_albicans_SC53141498296	Ca21chr1_C_albicans_SC53141498312				Ca21chr1_C_albicans_SC53141498296			FALSE
Ca21chr1_C_albicans_SC5314	1498304	Ca21chr1_C_albicans_SC5314	1498313	Ca21chr1_C_albicans_SC53141498304	Ca21chr1_C_albicans_SC53141498313				Ca21chr1_C_albicans_SC53141498304			FALSE
Ca21chr1_C_albicans_SC5314	1498305	Ca21chr1_C_albicans_SC5314	1498322	Ca21chr1_C_albicans_SC53141498305	Ca21chr1_C_albicans_SC53141498322				Ca21chr1_C_albicans_SC53141498305			FALSE
Ca21chr1_C_albicans_SC5314	1498312	Ca21chr1_C_albicans_SC5314	1498323	Ca21chr1_C_albicans_SC53141498312	Ca21chr1_C_albicans_SC53141498323				Ca21chr1_C_albicans_SC53141498312			FALSE
Ca21chr1_C_albicans_SC5314	1498313	Ca21chr1_C_albicans_SC5314	1498346	Ca21chr1_C_albicans_SC53141498313	Ca21chr1_C_albicans_SC53141498346				Ca21chr1_C_albicans_SC53141498313			FALSE
Ca21chr1_C_albicans_SC5314	1498322	Ca21chr1_C_albicans_SC5314	1519520	Ca21chr1_C_albicans_SC53141498322	Ca21chr1_C_albicans_SC53141519520				Ca21chr1_C_albicans_SC53141498322			FALSE
Ca21chr1_C_albicans_SC5314	1498323	Ca21chr1_C_albicans_SC5314	1580331	Ca21chr1_C_albicans_SC53141498323	Ca21chr1_C_albicans_SC53141580331				Ca21chr1_C_albicans_SC53141498323			FALSE
Ca21chr1_C_albicans_SC5314	1498346	Ca21chr1_C_albicans_SC5314	1626078	Ca21chr1_C_albicans_SC53141498346	Ca21chr1_C_albicans_SC53141626078				Ca21chr1_C_albicans_SC53141498346			FALSE
Ca21chr1_C_albicans_SC5314	1519520	Ca21chr1_C_albicans_SC5314	1652337	Ca21chr1_C_albicans_SC53141519520	Ca21chr1_C_albicans_SC53141652337				Ca21chr1_C_albicans_SC53141519520			FALSE
Ca21chr1_C_albicans_SC5314	1580331	Ca21chr1_C_albicans_SC5314	1652375	Ca21chr1_C_albicans_SC53141580331	Ca21chr1_C_albicans_SC53141652375				Ca21chr1_C_albicans_SC53141580331			FALSE
Ca21chr1_C_albicans_SC5314	1626078	Ca21chr1_C_albicans_SC5314	1670790	Ca21chr1_C_albicans_SC53141626078	Ca21chr1_C_albicans_SC53141670790				Ca21chr1_C_albicans_SC53141626078			FALSE
Ca21chr1_C_albicans_SC5314	1652337	Ca21chr1_C_albicans_SC5314	1671432	Ca21chr1_C_albicans_SC53141652337	Ca21chr1_C_albicans_SC53141671432				Ca21chr1_C_albicans_SC53141652337			FALSE
Ca21chr1_C_albicans_SC5314	1652375	Ca21chr1_C_albicans_SC5314	1671540	Ca21chr1_C_albicans_SC53141652375	Ca21chr1_C_albicans_SC53141671540				Ca21chr1_C_albicans_SC53141652375			FALSE
Ca21chr1_C_albicans_SC5314	1670790	Ca21chr1_C_albicans_SC5314	1671544	Ca21chr1_C_albicans_SC53141670790	Ca21chr1_C_albicans_SC53141671544				Ca21chr1_C_albicans_SC53141670790			FALSE
Ca21chr1_C_albicans_SC5314	1671432	Ca21chr1_C_albicans_SC5314	1671552	Ca21chr1_C_albicans_SC53141671432	Ca21chr1_C_albicans_SC53141671552				Ca21chr1_C_albicans_SC53141671432			FALSE
Ca21chr1_C_albicans_SC5314	1671540	Ca21chr1_C_albicans_SC5314	1716589	Ca21chr1_C_albicans_SC53141671540	Ca21chr1_C_albicans_SC53141716589				Ca21chr1_C_albicans_SC53141671540			FALSE
Ca21chr1_C_albicans_SC5314	1671544	Ca21chr1_C_albicans_SC5314	1716591	Ca21chr1_C_albicans_SC53141671544	Ca21chr1_C_albicans_SC53141716591				Ca21chr1_C_albicans_SC53141671544			FALSE
Ca21chr1_C_albicans_SC5314	1671552	Ca21chr1_C_albicans_SC5314	1716611	Ca21chr1_C_albicans_SC53141671552	Ca21chr1_C_albicans_SC53141716611				Ca21chr1_C_albicans_SC53141671552			FALSE
Ca21chr1_C_albicans_SC5314	1716589	Ca21chr1_C_albicans_SC5314	1716616	Ca21chr1_C_albicans_SC53141716589	Ca21chr1_C_albicans_SC53141716616				Ca21chr1_C_albicans_SC53141716589			FALSE
Ca21chr1_C_albicans_SC5314	1716591	Ca21chr1_C_albicans_SC5314	1716649	Ca21chr1_C_albicans_SC53141716591	Ca21chr1_C_albicans_SC53141716649				Ca21chr1_C_albicans_SC53141716591			FALSE
Ca21chr1_C_albicans_SC5314	1716611	Ca21chr1_C_albicans_SC5314	1716650	Ca21chr1_C_albicans_SC53141716611	Ca21chr1_C_albicans_SC53141716650				Ca21chr1_C_albicans_SC53141716611			FALSE
Ca21chr1_C_albicans_SC5314	1716616	Ca21chr1_C_albicans_SC5314	1716651	Ca21chr1_C_albicans_SC53141716616	Ca21chr1_C_albicans_SC53141716651				Ca21chr1_C_albicans_SC53141716616			FALSE
Ca21chr1_C_albicans_SC5314	1716649	Ca21chr1_C_albicans_SC5314	1716658	Ca21chr1_C_albicans_SC53141716649	Ca21chr1_C_albicans_SC53141716658				Ca21chr1_C_albicans_SC53141716649			FALSE
Ca21chr1_C_albicans_SC5314	1716650	Ca21chr1_C_albicans_SC5314	1716660	Ca21chr1_C_albicans_SC53141716650	Ca21chr1_C_albicans_SC53141716660				Ca21chr1_C_albicans_SC53141716650			FALSE
Ca21chr1_C_albicans_SC5314	1716651	Ca21chr1_C_albicans_SC5314	1716661	Ca21chr1_C_albicans_SC53141716651	Ca21chr1_C_albicans_SC53141716661				Ca21chr1_C_albicans_SC53141716651			FALSE
Ca21chr1_C_albicans_SC5314	1716658	Ca21chr1_C_albicans_SC5314	1716666	Ca21chr1_C_albicans_SC53141716658	Ca21chr1_C_albicans_SC53141716666				Ca21chr1_C_albicans_SC53141716658			FALSE
Ca21chr1_C_albicans_SC5314	1716660	Ca21chr1_C_albicans_SC5314	1716667	Ca21chr1_C_albicans_SC53141716660	Ca21chr1_C_albicans_SC53141716667				Ca21chr1_C_albicans_SC53141716660			FALSE
Ca21chr1_C_albicans_SC5314	1716661	Ca21chr1_C_albicans_SC5314	1716672	Ca21chr1_C_albicans_SC53141716661	Ca21chr1_C_albicans_SC53141716672				Ca21chr1_C_albicans_SC53141716661			FALSE
Ca21chr1_C_albicans_SC5314	1716666	Ca21chr1_C_albicans_SC5314	1716679	Ca21chr1_C_albicans_SC53141716666	Ca21chr1_C_albicans_SC53141716679				Ca21chr1_C_albicans_SC53141716666			FALSE
Ca21chr1_C_albicans_SC5314	1716667	Ca21chr1_C_albicans_SC5314	1716682	Ca21chr1_C_albicans_SC53141716667	Ca21chr1_C_albicans_SC53141716682				Ca21chr1_C_albicans_SC53141716667			FALSE
Ca21chr1_C_albicans_SC5314	1716672	Ca21chr1_C_albicans_SC5314	1716684	Ca21chr1_C_albicans_SC53141716672	Ca21chr1_C_albicans_SC53141716684				Ca21chr1_C_albicans_SC53141716672			FALSE
Ca21chr1_C_albicans_SC5314	1716679	Ca21chr1_C_albicans_SC5314	1716685	Ca21chr1_C_albicans_SC53141716679	Ca21chr1_C_albicans_SC53141716685				Ca21chr1_C_albicans_SC53141716679			FALSE
Ca21chr1_C_albicans_SC5314	1716682	Ca21chr1_C_albicans_SC5314	1716693	Ca21chr1_C_albicans_SC53141716682	Ca21chr1_C_albicans_SC53141716693				Ca21chr1_C_albicans_SC53141716682			FALSE
Ca21chr1_C_albicans_SC5314	1716684	Ca21chr1_C_albicans_SC5314	1716694	Ca21chr1_C_albicans_SC53141716684	Ca21chr1_C_albicans_SC53141716694				Ca21chr1_C_albicans_SC53141716684			FALSE
Ca21chr1_C_albicans_SC5314	1716685	Ca21chr1_C_albicans_SC5314	1716695	Ca21chr1_C_albicans_SC53141716685	Ca21chr1_C_albicans_SC53141716695				Ca21chr1_C_albicans_SC53141716685			FALSE
Ca21chr1_C_albicans_SC5314	1716693	Ca21chr1_C_albicans_SC5314	1716700	Ca21chr1_C_albicans_SC53141716693	Ca21chr1_C_albicans_SC53141716700				Ca21chr1_C_albicans_SC53141716693			FALSE
Ca21chr1_C_albicans_SC5314	1716694	Ca21chr1_C_albicans_SC5314	1716701	Ca21chr1_C_albicans_SC53141716694	Ca21chr1_C_albicans_SC53141716701				Ca21chr1_C_albicans_SC53141716694			FALSE
Ca21chr1_C_albicans_SC5314	1716695	Ca21chr1_C_albicans_SC5314	1716707	Ca21chr1_C_albicans_SC53141716695	Ca21chr1_C_albicans_SC53141716707				Ca21chr1_C_albicans_SC53141716695			FALSE
Ca21chr1_C_albicans_SC5314	1716700	Ca21chr1_C_albicans_SC5314	1716710	Ca21chr1_C_albicans_SC53141716700	Ca21chr1_C_albicans_SC53141716710				Ca21chr1_C_albicans_SC53141716700			FALSE
Ca21chr1_C_albicans_SC5314	1716701	Ca21chr1_C_albicans_SC5314	1716711	Ca21chr1_C_albicans_SC53141716701	Ca21chr1_C_albicans_SC53141716711				Ca21chr1_C_albicans_SC53141716701			FALSE
Ca21chr1_C_albicans_SC5314	1716707	Ca21chr1_C_albicans_SC5314	1716714	Ca21chr1_C_albicans_SC53141716707	Ca21chr1_C_albicans_SC53141716714				Ca21chr1_C_albicans_SC53141716707			FALSE
Ca21chr1_C_albicans_SC5314	1716710	Ca21chr1_C_albicans_SC5314	1716718	Ca21chr1_C_albicans_SC53141716710	Ca21chr1_C_albicans_SC53141716718				Ca21chr1_C_albicans_SC53141716710			FALSE
Ca21chr1_C_albicans_SC5314	1716711	Ca21chr1_C_albicans_SC5314	1726431	Ca21chr1_C_albicans_SC53141716711	Ca21chr1_C_albicans_SC53141726431				Ca21chr1_C_albicans_SC53141716711			FALSE
Ca21chr1_C_albicans_SC5314	1716714	Ca21chr1_C_albicans_SC5314	1734731	Ca21chr1_C_albicans_SC53141716714	Ca21chr1_C_albicans_SC53141734731				Ca21chr1_C_albicans_SC53141716714			FALSE
Ca21chr1_C_albicans_SC5314	1716718	Ca21chr1_C_albicans_SC5314	1763067	Ca21chr1_C_albicans_SC53141716718	Ca21chr1_C_albicans_SC53141763067				Ca21chr1_C_albicans_SC53141716718			FALSE
Ca21chr1_C_albicans_SC5314	1726431	Ca21chr1_C_albicans_SC5314	1763085	Ca21chr1_C_albicans_SC53141726431	Ca21chr1_C_albicans_SC53141763085				Ca21chr1_C_albicans_SC53141726431			FALSE
Ca21chr1_C_albicans_SC5314	1734731	Ca21chr1_C_albicans_SC5314	1763092	Ca21chr1_C_albicans_SC53141734731	Ca21chr1_C_albicans_SC53141763092				Ca21chr1_C_albicans_SC53141734731			FALSE
Ca21chr1_C_albicans_SC5314	1763067	Ca21chr1_C_albicans_SC5314	1763111	Ca21chr1_C_albicans_SC53141763067	Ca21chr1_C_albicans_SC53141763111				Ca21chr1_C_albicans_SC53141763067			FALSE
Ca21chr1_C_albicans_SC5314	1763085	Ca21chr1_C_albicans_SC5314	1763118	Ca21chr1_C_albicans_SC53141763085	Ca21chr1_C_albicans_SC53141763118				Ca21chr1_C_albicans_SC53141763085			FALSE
Ca21chr1_C_albicans_SC5314	1763092	Ca21chr1_C_albicans_SC5314	1763145	Ca21chr1_C_albicans_SC53141763092	Ca21chr1_C_albicans_SC53141763145				Ca21chr1_C_albicans_SC53141763092			FALSE
Ca21chr1_C_albicans_SC5314	1763111	Ca21chr1_C_albicans_SC5314	1763149	Ca21chr1_C_albicans_SC53141763111	Ca21chr1_C_albicans_SC53141763149				Ca21chr1_C_albicans_SC53141763111			FALSE
Ca21chr1_C_albicans_SC5314	1763118	Ca21chr1_C_albicans_SC5314	1763257	Ca21chr1_C_albicans_SC53141763118	Ca21chr1_C_albicans_SC53141763257				Ca21chr1_C_albicans_SC53141763118			FALSE
Ca21chr1_C_albicans_SC5314	1763145	Ca21chr1_C_albicans_SC5314	1763280	Ca21chr1_C_albicans_SC53141763145	Ca21chr1_C_albicans_SC53141763280				Ca21chr1_C_albicans_SC53141763145			FALSE
Ca21chr1_C_albicans_SC5314	1763149	Ca21chr1_C_albicans_SC5314	1763309	Ca21chr1_C_albicans_SC53141763149	Ca21chr1_C_albicans_SC53141763309				Ca21chr1_C_albicans_SC53141763149			FALSE
Ca21chr1_C_albicans_SC5314	1763257	Ca21chr1_C_albicans_SC5314	1763310	Ca21chr1_C_albicans_SC53141763257	Ca21chr1_C_albicans_SC53141763310				Ca21chr1_C_albicans_SC53141763257			FALSE
Ca21chr1_C_albicans_SC5314	1763280	Ca21chr1_C_albicans_SC5314	1775969	Ca21chr1_C_albicans_SC53141763280	Ca21chr1_C_albicans_SC53141775969				Ca21chr1_C_albicans_SC53141763280			FALSE
Ca21chr1_C_albicans_SC5314	1763309	Ca21chr1_C_albicans_SC5314	1775977	Ca21chr1_C_albicans_SC53141763309	Ca21chr1_C_albicans_SC53141775977				Ca21chr1_C_albicans_SC53141763309			FALSE
Ca21chr1_C_albicans_SC5314	1763310	Ca21chr1_C_albicans_SC5314	1811306	Ca21chr1_C_albicans_SC53141763310	Ca21chr1_C_albicans_SC53141811306				Ca21chr1_C_albicans_SC53141763310			FALSE
Ca21chr1_C_albicans_SC5314	1775969	Ca21chr1_C_albicans_SC5314	1898331	Ca21chr1_C_albicans_SC53141775969	Ca21chr1_C_albicans_SC53141898331				Ca21chr1_C_albicans_SC53141775969			FALSE
Ca21chr1_C_albicans_SC5314	1775977	Ca21chr1_C_albicans_SC5314	1898379	Ca21chr1_C_albicans_SC53141775977	Ca21chr1_C_albicans_SC53141898379				Ca21chr1_C_albicans_SC53141775977			FALSE
Ca21chr1_C_albicans_SC5314	1811306	Ca21chr1_C_albicans_SC5314	1915069	Ca21chr1_C_albicans_SC53141811306	Ca21chr1_C_albicans_SC53141915069				Ca21chr1_C_albicans_SC53141811306			FALSE
Ca21chr1_C_albicans_SC5314	1898331	Ca21chr1_C_albicans_SC5314	1915090	Ca21chr1_C_albicans_SC53141898331	Ca21chr1_C_albicans_SC53141915090				Ca21chr1_C_albicans_SC53141898331			FALSE
Ca21chr1_C_albicans_SC5314	1898379	Ca21chr1_C_albicans_SC5314	1915097	Ca21chr1_C_albicans_SC53141898379	Ca21chr1_C_albicans_SC53141915097				Ca21chr1_C_albicans_SC53141898379			FALSE
Ca21chr1_C_albicans_SC5314	1915069	Ca21chr1_C_albicans_SC5314	1915098	Ca21chr1_C_albicans_SC53141915069	Ca21chr1_C_albicans_SC53141915098				Ca21chr1_C_albicans_SC53141915069			FALSE
Ca21chr1_C_albicans_SC5314	1915090	Ca21chr1_C_albicans_SC5314	1915099	Ca21chr1_C_albicans_SC53141915090	Ca21chr1_C_albicans_SC53141915099				Ca21chr1_C_albicans_SC53141915090			FALSE
Ca21chr1_C_albicans_SC5314	1915097	Ca21chr1_C_albicans_SC5314	1922353	Ca21chr1_C_albicans_SC53141915097	Ca21chr1_C_albicans_SC53141922353				Ca21chr1_C_albicans_SC53141915097			FALSE
Ca21chr1_C_albicans_SC5314	1915098	Ca21chr1_C_albicans_SC5314	1925347	Ca21chr1_C_albicans_SC53141915098	Ca21chr1_C_albicans_SC53141925347				Ca21chr1_C_albicans_SC53141915098			FALSE
Ca21chr1_C_albicans_SC5314	1915099	Ca21chr1_C_albicans_SC5314	1925350	Ca21chr1_C_albicans_SC53141915099	Ca21chr1_C_albicans_SC53141925350				Ca21chr1_C_albicans_SC53141915099			FALSE
Ca21chr1_C_albicans_SC5314	1922353	Ca21chr1_C_albicans_SC5314	1930077	Ca21chr1_C_albicans_SC53141922353	Ca21chr1_C_albicans_SC53141930077				Ca21chr1_C_albicans_SC53141922353			FALSE
Ca21chr1_C_albicans_SC5314	1925347	Ca21chr1_C_albicans_SC5314	1992273	Ca21chr1_C_albicans_SC53141925347	Ca21chr1_C_albicans_SC53141992273				Ca21chr1_C_albicans_SC53141925347			FALSE
Ca21chr1_C_albicans_SC5314	1925350	Ca21chr1_C_albicans_SC5314	1992282	Ca21chr1_C_albicans_SC53141925350	Ca21chr1_C_albicans_SC53141992282				Ca21chr1_C_albicans_SC53141925350			FALSE
Ca21chr1_C_albicans_SC5314	1930077	Ca21chr1_C_albicans_SC5314	1992332	Ca21chr1_C_albicans_SC53141930077	Ca21chr1_C_albicans_SC53141992332				Ca21chr1_C_albicans_SC53141930077			FALSE
Ca21chr1_C_albicans_SC5314	1992273	Ca21chr1_C_albicans_SC5314	1992335	Ca21chr1_C_albicans_SC53141992273	Ca21chr1_C_albicans_SC53141992335				Ca21chr1_C_albicans_SC53141992273			FALSE
Ca21chr1_C_albicans_SC5314	1992282	Ca21chr1_C_albicans_SC5314	1992363	Ca21chr1_C_albicans_SC53141992282	Ca21chr1_C_albicans_SC53141992363				Ca21chr1_C_albicans_SC53141992282			FALSE
Ca21chr1_C_albicans_SC5314	1992332	Ca21chr1_C_albicans_SC5314	2073007	Ca21chr1_C_albicans_SC53141992332	Ca21chr1_C_albicans_SC53142073007				Ca21chr1_C_albicans_SC53141992332			FALSE
Ca21chr1_C_albicans_SC5314	1992335	Ca21chr1_C_albicans_SC5314	2103167	Ca21chr1_C_albicans_SC53141992335	Ca21chr1_C_albicans_SC53142103167				Ca21chr1_C_albicans_SC53141992335			FALSE
Ca21chr1_C_albicans_SC5314	1992363	Ca21chr1_C_albicans_SC5314	2103212	Ca21chr1_C_albicans_SC53141992363	Ca21chr1_C_albicans_SC53142103212				Ca21chr1_C_albicans_SC53141992363			FALSE
Ca21chr1_C_albicans_SC5314	2073007	Ca21chr1_C_albicans_SC5314	2103292	Ca21chr1_C_albicans_SC53142073007	Ca21chr1_C_albicans_SC53142103292				Ca21chr1_C_albicans_SC53142073007			FALSE
Ca21chr1_C_albicans_SC5314	2103167	Ca21chr1_C_albicans_SC5314	2172245	Ca21chr1_C_albicans_SC53142103167	Ca21chr1_C_albicans_SC53142172245				Ca21chr1_C_albicans_SC53142103167			FALSE
Ca21chr1_C_albicans_SC5314	2103212	Ca21chr1_C_albicans_SC5314	2172248	Ca21chr1_C_albicans_SC53142103212	Ca21chr1_C_albicans_SC53142172248				Ca21chr1_C_albicans_SC53142103212			FALSE
Ca21chr1_C_albicans_SC5314	2103292	Ca21chr1_C_albicans_SC5314	2172261	Ca21chr1_C_albicans_SC53142103292	Ca21chr1_C_albicans_SC53142172261				Ca21chr1_C_albicans_SC53142103292			FALSE
Ca21chr1_C_albicans_SC5314	2172245	Ca21chr1_C_albicans_SC5314	2172262	Ca21chr1_C_albicans_SC53142172245	Ca21chr1_C_albicans_SC53142172262				Ca21chr1_C_albicans_SC53142172245			FALSE
Ca21chr1_C_albicans_SC5314	2172248	Ca21chr1_C_albicans_SC5314	2174118	Ca21chr1_C_albicans_SC53142172248	Ca21chr1_C_albicans_SC53142174118				Ca21chr1_C_albicans_SC53142172248			FALSE
Ca21chr1_C_albicans_SC5314	2172261	Ca21chr1_C_albicans_SC5314	2174126	Ca21chr1_C_albicans_SC53142172261	Ca21chr1_C_albicans_SC53142174126				Ca21chr1_C_albicans_SC53142172261			FALSE
Ca21chr1_C_albicans_SC5314	2172262	Ca21chr1_C_albicans_SC5314	2174142	Ca21chr1_C_albicans_SC53142172262	Ca21chr1_C_albicans_SC53142174142				Ca21chr1_C_albicans_SC53142172262			FALSE
Ca21chr1_C_albicans_SC5314	2174118	Ca21chr1_C_albicans_SC5314	2174149	Ca21chr1_C_albicans_SC53142174118	Ca21chr1_C_albicans_SC53142174149				Ca21chr1_C_albicans_SC53142174118			FALSE
Ca21chr1_C_albicans_SC5314	2174126	Ca21chr1_C_albicans_SC5314	2174152	Ca21chr1_C_albicans_SC53142174126	Ca21chr1_C_albicans_SC53142174152				Ca21chr1_C_albicans_SC53142174126			FALSE
Ca21chr1_C_albicans_SC5314	2174142	Ca21chr1_C_albicans_SC5314	2174175	Ca21chr1_C_albicans_SC53142174142	Ca21chr1_C_albicans_SC53142174175				Ca21chr1_C_albicans_SC53142174142			FALSE
Ca21chr1_C_albicans_SC5314	2174149	Ca21chr1_C_albicans_SC5314	2174176	Ca21chr1_C_albicans_SC53142174149	Ca21chr1_C_albicans_SC53142174176				Ca21chr1_C_albicans_SC53142174149			FALSE
Ca21chr1_C_albicans_SC5314	2174152	Ca21chr1_C_albicans_SC5314	2174182	Ca21chr1_C_albicans_SC53142174152	Ca21chr1_C_albicans_SC53142174182				Ca21chr1_C_albicans_SC53142174152			FALSE
Ca21chr1_C_albicans_SC5314	2174175	Ca21chr1_C_albicans_SC5314	2176871	Ca21chr1_C_albicans_SC53142174175	Ca21chr1_C_albicans_SC53142176871				Ca21chr1_C_albicans_SC53142174175			FALSE
Ca21chr1_C_albicans_SC5314	2174176	Ca21chr1_C_albicans_SC5314	2196210	Ca21chr1_C_albicans_SC53142174176	Ca21chr1_C_albicans_SC53142196210				Ca21chr1_C_albicans_SC53142174176			FALSE
Ca21chr1_C_albicans_SC5314	2174182	Ca21chr1_C_albicans_SC5314	2241088	Ca21chr1_C_albicans_SC53142174182	Ca21chr1_C_albicans_SC53142241088				Ca21chr1_C_albicans_SC53142174182			FALSE
Ca21chr1_C_albicans_SC5314	2174243	Ca21chr1_C_albicans_SC5314	2241089	Ca21chr1_C_albicans_SC53142174243	Ca21chr1_C_albicans_SC53142241089				#N/A			TRUE
Ca21chr1_C_albicans_SC5314	2176871	Ca21chr1_C_albicans_SC5314	2280547	Ca21chr1_C_albicans_SC53142176871	Ca21chr1_C_albicans_SC53142280547				Ca21chr1_C_albicans_SC53142176871			FALSE
Ca21chr1_C_albicans_SC5314	2196210	Ca21chr1_C_albicans_SC5314	2280614	Ca21chr1_C_albicans_SC53142196210	Ca21chr1_C_albicans_SC53142280614				Ca21chr1_C_albicans_SC53142196210			FALSE
Ca21chr1_C_albicans_SC5314	2241088	Ca21chr1_C_albicans_SC5314	2333443	Ca21chr1_C_albicans_SC53142241088	Ca21chr1_C_albicans_SC53142333443				Ca21chr1_C_albicans_SC53142241088			FALSE
Ca21chr1_C_albicans_SC5314	2241089	Ca21chr1_C_albicans_SC5314	2400934	Ca21chr1_C_albicans_SC53142241089	Ca21chr1_C_albicans_SC53142400934				Ca21chr1_C_albicans_SC53142241089			FALSE
Ca21chr1_C_albicans_SC5314	2280547	Ca21chr1_C_albicans_SC5314	2400951	Ca21chr1_C_albicans_SC53142280547	Ca21chr1_C_albicans_SC53142400951				Ca21chr1_C_albicans_SC53142280547			FALSE
Ca21chr1_C_albicans_SC5314	2280614	Ca21chr1_C_albicans_SC5314	2494100	Ca21chr1_C_albicans_SC53142280614	Ca21chr1_C_albicans_SC53142494100				Ca21chr1_C_albicans_SC53142280614			FALSE
Ca21chr1_C_albicans_SC5314	2333443	Ca21chr1_C_albicans_SC5314	2494125	Ca21chr1_C_albicans_SC53142333443	Ca21chr1_C_albicans_SC53142494125				Ca21chr1_C_albicans_SC53142333443			FALSE
Ca21chr1_C_albicans_SC5314	2400934	Ca21chr1_C_albicans_SC5314	2494173	Ca21chr1_C_albicans_SC53142400934	Ca21chr1_C_albicans_SC53142494173				Ca21chr1_C_albicans_SC53142400934			FALSE
Ca21chr1_C_albicans_SC5314	2400951	Ca21chr1_C_albicans_SC5314	2494190	Ca21chr1_C_albicans_SC53142400951	Ca21chr1_C_albicans_SC53142494190				Ca21chr1_C_albicans_SC53142400951			FALSE
Ca21chr1_C_albicans_SC5314	2494100	Ca21chr1_C_albicans_SC5314	2494191	Ca21chr1_C_albicans_SC53142494100	Ca21chr1_C_albicans_SC53142494191				Ca21chr1_C_albicans_SC53142494100			FALSE
Ca21chr1_C_albicans_SC5314	2494125	Ca21chr1_C_albicans_SC5314	2494192	Ca21chr1_C_albicans_SC53142494125	Ca21chr1_C_albicans_SC53142494192				Ca21chr1_C_albicans_SC53142494125			FALSE
Ca21chr1_C_albicans_SC5314	2494173	Ca21chr1_C_albicans_SC5314	2494193	Ca21chr1_C_albicans_SC53142494173	Ca21chr1_C_albicans_SC53142494193				Ca21chr1_C_albicans_SC53142494173			FALSE
Ca21chr1_C_albicans_SC5314	2494190	Ca21chr1_C_albicans_SC5314	2494210	Ca21chr1_C_albicans_SC53142494190	Ca21chr1_C_albicans_SC53142494210				Ca21chr1_C_albicans_SC53142494190			FALSE
Ca21chr1_C_albicans_SC5314	2494191	Ca21chr1_C_albicans_SC5314	2494303	Ca21chr1_C_albicans_SC53142494191	Ca21chr1_C_albicans_SC53142494303				Ca21chr1_C_albicans_SC53142494191			FALSE
Ca21chr1_C_albicans_SC5314	2494192	Ca21chr1_C_albicans_SC5314	2494312	Ca21chr1_C_albicans_SC53142494192	Ca21chr1_C_albicans_SC53142494312				Ca21chr1_C_albicans_SC53142494192			FALSE
Ca21chr1_C_albicans_SC5314	2494193	Ca21chr1_C_albicans_SC5314	2494335	Ca21chr1_C_albicans_SC53142494193	Ca21chr1_C_albicans_SC53142494335				Ca21chr1_C_albicans_SC53142494193			FALSE
Ca21chr1_C_albicans_SC5314	2494210	Ca21chr1_C_albicans_SC5314	2507730	Ca21chr1_C_albicans_SC53142494210	Ca21chr1_C_albicans_SC53142507730				Ca21chr1_C_albicans_SC53142494210			FALSE
Ca21chr1_C_albicans_SC5314	2494303	Ca21chr1_C_albicans_SC5314	2545759	Ca21chr1_C_albicans_SC53142494303	Ca21chr1_C_albicans_SC53142545759				Ca21chr1_C_albicans_SC53142494303			FALSE
Ca21chr1_C_albicans_SC5314	2494312	Ca21chr1_C_albicans_SC5314	2545782	Ca21chr1_C_albicans_SC53142494312	Ca21chr1_C_albicans_SC53142545782				Ca21chr1_C_albicans_SC53142494312			FALSE
Ca21chr1_C_albicans_SC5314	2494335	Ca21chr1_C_albicans_SC5314	2558909	Ca21chr1_C_albicans_SC53142494335	Ca21chr1_C_albicans_SC53142558909				Ca21chr1_C_albicans_SC53142494335			FALSE
Ca21chr1_C_albicans_SC5314	2507730	Ca21chr1_C_albicans_SC5314	2564997	Ca21chr1_C_albicans_SC53142507730	Ca21chr1_C_albicans_SC53142564997				Ca21chr1_C_albicans_SC53142507730			FALSE
Ca21chr1_C_albicans_SC5314	2545759	Ca21chr1_C_albicans_SC5314	2568586	Ca21chr1_C_albicans_SC53142545759	Ca21chr1_C_albicans_SC53142568586				Ca21chr1_C_albicans_SC53142545759			FALSE
Ca21chr1_C_albicans_SC5314	2545782	Ca21chr1_C_albicans_SC5314	2667149	Ca21chr1_C_albicans_SC53142545782	Ca21chr1_C_albicans_SC53142667149				Ca21chr1_C_albicans_SC53142545782			FALSE
Ca21chr1_C_albicans_SC5314	2558909	Ca21chr1_C_albicans_SC5314	2667157	Ca21chr1_C_albicans_SC53142558909	Ca21chr1_C_albicans_SC53142667157				Ca21chr1_C_albicans_SC53142558909			FALSE
Ca21chr1_C_albicans_SC5314	2564997	Ca21chr1_C_albicans_SC5314	2667159	Ca21chr1_C_albicans_SC53142564997	Ca21chr1_C_albicans_SC53142667159				Ca21chr1_C_albicans_SC53142564997			FALSE
Ca21chr1_C_albicans_SC5314	2568586	Ca21chr1_C_albicans_SC5314	2667176	Ca21chr1_C_albicans_SC53142568586	Ca21chr1_C_albicans_SC53142667176				Ca21chr1_C_albicans_SC53142568586			FALSE
Ca21chr1_C_albicans_SC5314	2667149	Ca21chr1_C_albicans_SC5314	2667191	Ca21chr1_C_albicans_SC53142667149	Ca21chr1_C_albicans_SC53142667191				Ca21chr1_C_albicans_SC53142667149			FALSE
Ca21chr1_C_albicans_SC5314	2667157	Ca21chr1_C_albicans_SC5314	2667218	Ca21chr1_C_albicans_SC53142667157	Ca21chr1_C_albicans_SC53142667218				Ca21chr1_C_albicans_SC53142667157			FALSE
Ca21chr1_C_albicans_SC5314	2667159	Ca21chr1_C_albicans_SC5314	2667241	Ca21chr1_C_albicans_SC53142667159	Ca21chr1_C_albicans_SC53142667241				Ca21chr1_C_albicans_SC53142667159			FALSE
Ca21chr1_C_albicans_SC5314	2667176	Ca21chr1_C_albicans_SC5314	2670470	Ca21chr1_C_albicans_SC53142667176	Ca21chr1_C_albicans_SC53142670470				Ca21chr1_C_albicans_SC53142667176			FALSE
Ca21chr1_C_albicans_SC5314	2667191	Ca21chr1_C_albicans_SC5314	2670602	Ca21chr1_C_albicans_SC53142667191	Ca21chr1_C_albicans_SC53142670602				Ca21chr1_C_albicans_SC53142667191			FALSE
Ca21chr1_C_albicans_SC5314	2667218	Ca21chr1_C_albicans_SC5314	2700360	Ca21chr1_C_albicans_SC53142667218	Ca21chr1_C_albicans_SC53142700360				Ca21chr1_C_albicans_SC53142667218			FALSE
Ca21chr1_C_albicans_SC5314	2667241	Ca21chr1_C_albicans_SC5314	2705387	Ca21chr1_C_albicans_SC53142667241	Ca21chr1_C_albicans_SC53142705387				Ca21chr1_C_albicans_SC53142667241			FALSE
Ca21chr1_C_albicans_SC5314	2670470	Ca21chr1_C_albicans_SC5314	2705468	Ca21chr1_C_albicans_SC53142670470	Ca21chr1_C_albicans_SC53142705468				Ca21chr1_C_albicans_SC53142670470			FALSE
Ca21chr1_C_albicans_SC5314	2670602	Ca21chr1_C_albicans_SC5314	2705520	Ca21chr1_C_albicans_SC53142670602	Ca21chr1_C_albicans_SC53142705520				Ca21chr1_C_albicans_SC53142670602			FALSE
Ca21chr1_C_albicans_SC5314	2700360	Ca21chr1_C_albicans_SC5314	2705590	Ca21chr1_C_albicans_SC53142700360	Ca21chr1_C_albicans_SC53142705590				Ca21chr1_C_albicans_SC53142700360			FALSE
Ca21chr1_C_albicans_SC5314	2705387	Ca21chr1_C_albicans_SC5314	2749383	Ca21chr1_C_albicans_SC53142705387	Ca21chr1_C_albicans_SC53142749383				Ca21chr1_C_albicans_SC53142705387			FALSE
Ca21chr1_C_albicans_SC5314	2705468	Ca21chr1_C_albicans_SC5314	2749415	Ca21chr1_C_albicans_SC53142705468	Ca21chr1_C_albicans_SC53142749415				Ca21chr1_C_albicans_SC53142705468			FALSE
Ca21chr1_C_albicans_SC5314	2705520	Ca21chr1_C_albicans_SC5314	2749430	Ca21chr1_C_albicans_SC53142705520	Ca21chr1_C_albicans_SC53142749430				Ca21chr1_C_albicans_SC53142705520			FALSE
Ca21chr1_C_albicans_SC5314	2705590	Ca21chr1_C_albicans_SC5314	2749518	Ca21chr1_C_albicans_SC53142705590	Ca21chr1_C_albicans_SC53142749518				Ca21chr1_C_albicans_SC53142705590			FALSE
Ca21chr1_C_albicans_SC5314	2749383	Ca21chr1_C_albicans_SC5314	2760874	Ca21chr1_C_albicans_SC53142749383	Ca21chr1_C_albicans_SC53142760874				Ca21chr1_C_albicans_SC53142749383			FALSE
Ca21chr1_C_albicans_SC5314	2749415	Ca21chr1_C_albicans_SC5314	2760875	Ca21chr1_C_albicans_SC53142749415	Ca21chr1_C_albicans_SC53142760875				Ca21chr1_C_albicans_SC53142749415			FALSE
Ca21chr1_C_albicans_SC5314	2749430	Ca21chr1_C_albicans_SC5314	2760891	Ca21chr1_C_albicans_SC53142749430	Ca21chr1_C_albicans_SC53142760891				Ca21chr1_C_albicans_SC53142749430			FALSE
Ca21chr1_C_albicans_SC5314	2749518	Ca21chr1_C_albicans_SC5314	2761108	Ca21chr1_C_albicans_SC53142749518	Ca21chr1_C_albicans_SC53142761108				Ca21chr1_C_albicans_SC53142749518			FALSE
Ca21chr1_C_albicans_SC5314	2760874	Ca21chr1_C_albicans_SC5314	2762083	Ca21chr1_C_albicans_SC53142760874	Ca21chr1_C_albicans_SC53142762083				Ca21chr1_C_albicans_SC53142760874			FALSE
Ca21chr1_C_albicans_SC5314	2760875	Ca21chr1_C_albicans_SC5314	2762174	Ca21chr1_C_albicans_SC53142760875	Ca21chr1_C_albicans_SC53142762174				Ca21chr1_C_albicans_SC53142760875			FALSE
Ca21chr1_C_albicans_SC5314	2760891	Ca21chr1_C_albicans_SC5314	2790028	Ca21chr1_C_albicans_SC53142760891	Ca21chr1_C_albicans_SC53142790028				Ca21chr1_C_albicans_SC53142760891			FALSE
Ca21chr1_C_albicans_SC5314	2761108	Ca21chr1_C_albicans_SC5314	2790035	Ca21chr1_C_albicans_SC53142761108	Ca21chr1_C_albicans_SC53142790035				Ca21chr1_C_albicans_SC53142761108			FALSE
Ca21chr1_C_albicans_SC5314	2762083	Ca21chr1_C_albicans_SC5314	2802416	Ca21chr1_C_albicans_SC53142762083	Ca21chr1_C_albicans_SC53142802416				Ca21chr1_C_albicans_SC53142762083			FALSE
Ca21chr1_C_albicans_SC5314	2762174	Ca21chr1_C_albicans_SC5314	2802420	Ca21chr1_C_albicans_SC53142762174	Ca21chr1_C_albicans_SC53142802420				Ca21chr1_C_albicans_SC53142762174			FALSE
Ca21chr1_C_albicans_SC5314	2790028	Ca21chr1_C_albicans_SC5314	2802429	Ca21chr1_C_albicans_SC53142790028	Ca21chr1_C_albicans_SC53142802429				Ca21chr1_C_albicans_SC53142790028			FALSE
Ca21chr1_C_albicans_SC5314	2790035	Ca21chr1_C_albicans_SC5314	2802438	Ca21chr1_C_albicans_SC53142790035	Ca21chr1_C_albicans_SC53142802438				Ca21chr1_C_albicans_SC53142790035			FALSE
Ca21chr1_C_albicans_SC5314	2802416	Ca21chr1_C_albicans_SC5314	2802520	Ca21chr1_C_albicans_SC53142802416	Ca21chr1_C_albicans_SC53142802520				Ca21chr1_C_albicans_SC53142802416			FALSE
Ca21chr1_C_albicans_SC5314	2802420	Ca21chr1_C_albicans_SC5314	2859726	Ca21chr1_C_albicans_SC53142802420	Ca21chr1_C_albicans_SC53142859726				Ca21chr1_C_albicans_SC53142802420			FALSE
Ca21chr1_C_albicans_SC5314	2802429	Ca21chr1_C_albicans_SC5314	2862899	Ca21chr1_C_albicans_SC53142802429	Ca21chr1_C_albicans_SC53142862899				Ca21chr1_C_albicans_SC53142802429			FALSE
Ca21chr1_C_albicans_SC5314	2802438	Ca21chr1_C_albicans_SC5314	2882211	Ca21chr1_C_albicans_SC53142802438	Ca21chr1_C_albicans_SC53142882211				Ca21chr1_C_albicans_SC53142802438			FALSE
Ca21chr1_C_albicans_SC5314	2802520	Ca21chr1_C_albicans_SC5314	2883304	Ca21chr1_C_albicans_SC53142802520	Ca21chr1_C_albicans_SC53142883304				Ca21chr1_C_albicans_SC53142802520			FALSE
Ca21chr1_C_albicans_SC5314	2805322	Ca21chr1_C_albicans_SC5314	2883345	Ca21chr1_C_albicans_SC53142805322	Ca21chr1_C_albicans_SC53142883345				#N/A			TRUE
Ca21chr1_C_albicans_SC5314	2805328	Ca21chr1_C_albicans_SC5314	2883365	Ca21chr1_C_albicans_SC53142805328	Ca21chr1_C_albicans_SC53142883365				#N/A			TRUE
Ca21chr1_C_albicans_SC5314	2859726	Ca21chr1_C_albicans_SC5314	2888919	Ca21chr1_C_albicans_SC53142859726	Ca21chr1_C_albicans_SC53142888919				Ca21chr1_C_albicans_SC53142859726			FALSE
Ca21chr1_C_albicans_SC5314	2862899	Ca21chr1_C_albicans_SC5314	2889131	Ca21chr1_C_albicans_SC53142862899	Ca21chr1_C_albicans_SC53142889131				Ca21chr1_C_albicans_SC53142862899			FALSE
Ca21chr1_C_albicans_SC5314	2882211	Ca21chr1_C_albicans_SC5314	2889184	Ca21chr1_C_albicans_SC53142882211	Ca21chr1_C_albicans_SC53142889184				Ca21chr1_C_albicans_SC53142882211			FALSE
Ca21chr1_C_albicans_SC5314	2888919	Ca21chr1_C_albicans_SC5314	2902760	Ca21chr1_C_albicans_SC53142888919	Ca21chr1_C_albicans_SC53142902760				Ca21chr1_C_albicans_SC53142888919			FALSE
Ca21chr1_C_albicans_SC5314	2889131	Ca21chr1_C_albicans_SC5314	2903126	Ca21chr1_C_albicans_SC53142889131	Ca21chr1_C_albicans_SC53142903126				Ca21chr1_C_albicans_SC53142889131			FALSE
Ca21chr1_C_albicans_SC5314	2889184	Ca21chr1_C_albicans_SC5314	2916318	Ca21chr1_C_albicans_SC53142889184	Ca21chr1_C_albicans_SC53142916318				Ca21chr1_C_albicans_SC53142889184			FALSE
Ca21chr1_C_albicans_SC5314	2893564	Ca21chr1_C_albicans_SC5314	2916321	Ca21chr1_C_albicans_SC53142893564	Ca21chr1_C_albicans_SC53142916321				#N/A			TRUE
Ca21chr1_C_albicans_SC5314	2902760	Ca21chr1_C_albicans_SC5314	2916324	Ca21chr1_C_albicans_SC53142902760	Ca21chr1_C_albicans_SC53142916324				Ca21chr1_C_albicans_SC53142902760			FALSE
Ca21chr1_C_albicans_SC5314	2903126	Ca21chr1_C_albicans_SC5314	2945839	Ca21chr1_C_albicans_SC53142903126	Ca21chr1_C_albicans_SC53142945839				Ca21chr1_C_albicans_SC53142903126			FALSE
Ca21chr1_C_albicans_SC5314	2916318	Ca21chr1_C_albicans_SC5314	2945840	Ca21chr1_C_albicans_SC53142916318	Ca21chr1_C_albicans_SC53142945840				Ca21chr1_C_albicans_SC53142916318			FALSE
Ca21chr1_C_albicans_SC5314	2916321	Ca21chr1_C_albicans_SC5314	2945856	Ca21chr1_C_albicans_SC53142916321	Ca21chr1_C_albicans_SC53142945856				Ca21chr1_C_albicans_SC53142916321			FALSE
Ca21chr1_C_albicans_SC5314	2916324	Ca21chr1_C_albicans_SC5314	2946631	Ca21chr1_C_albicans_SC53142916324	Ca21chr1_C_albicans_SC53142946631				Ca21chr1_C_albicans_SC53142916324			FALSE
Ca21chr1_C_albicans_SC5314	2945839	Ca21chr1_C_albicans_SC5314	2947007	Ca21chr1_C_albicans_SC53142945839	Ca21chr1_C_albicans_SC53142947007				Ca21chr1_C_albicans_SC53142945839			FALSE
Ca21chr1_C_albicans_SC5314	2945840	Ca21chr1_C_albicans_SC5314	2965507	Ca21chr1_C_albicans_SC53142945840	Ca21chr1_C_albicans_SC53142965507				Ca21chr1_C_albicans_SC53142945840			FALSE
Ca21chr1_C_albicans_SC5314	2945856	Ca21chr1_C_albicans_SC5314	3180720	Ca21chr1_C_albicans_SC53142945856	Ca21chr1_C_albicans_SC53143180720				Ca21chr1_C_albicans_SC53142945856			FALSE
Ca21chr1_C_albicans_SC5314	2946631	Ca21chr1_C_albicans_SC5314	3180726	Ca21chr1_C_albicans_SC53142946631	Ca21chr1_C_albicans_SC53143180726				Ca21chr1_C_albicans_SC53142946631			FALSE
Ca21chr1_C_albicans_SC5314	2947007	Ca21chr1_C_albicans_SC5314	3180763	Ca21chr1_C_albicans_SC53142947007	Ca21chr1_C_albicans_SC53143180763				Ca21chr1_C_albicans_SC53142947007			FALSE
Ca21chr1_C_albicans_SC5314	2965507	Ca21chr1_C_albicans_SC5314	3180771	Ca21chr1_C_albicans_SC53142965507	Ca21chr1_C_albicans_SC53143180771				Ca21chr1_C_albicans_SC53142965507			FALSE
Ca21chr1_C_albicans_SC5314	3180720	Ca21chr1_C_albicans_SC5314	3180783	Ca21chr1_C_albicans_SC53143180720	Ca21chr1_C_albicans_SC53143180783				Ca21chr1_C_albicans_SC53143180720			FALSE
Ca21chr1_C_albicans_SC5314	3180726	Ca21chr1_C_albicans_SC5314	3180788	Ca21chr1_C_albicans_SC53143180726	Ca21chr1_C_albicans_SC53143180788				Ca21chr1_C_albicans_SC53143180726			FALSE
Ca21chr1_C_albicans_SC5314	3180763	Ca21chr2_C_albicans_SC5314	7218	Ca21chr1_C_albicans_SC53143180763	Ca21chr2_C_albicans_SC53147218				Ca21chr1_C_albicans_SC53143180763			FALSE
Ca21chr1_C_albicans_SC5314	3180771	Ca21chr2_C_albicans_SC5314	7522	Ca21chr1_C_albicans_SC53143180771	Ca21chr2_C_albicans_SC53147522				Ca21chr1_C_albicans_SC53143180771			FALSE
Ca21chr1_C_albicans_SC5314	3180783	Ca21chr2_C_albicans_SC5314	7632	Ca21chr1_C_albicans_SC53143180783	Ca21chr2_C_albicans_SC53147632				Ca21chr1_C_albicans_SC53143180783			FALSE
Ca21chr1_C_albicans_SC5314	3180788	Ca21chr2_C_albicans_SC5314	7782	Ca21chr1_C_albicans_SC53143180788	Ca21chr2_C_albicans_SC53147782				Ca21chr1_C_albicans_SC53143180788			FALSE
Ca21chr2_C_albicans_SC5314	7218	Ca21chr2_C_albicans_SC5314	7788	Ca21chr2_C_albicans_SC53147218	Ca21chr2_C_albicans_SC53147788				Ca21chr2_C_albicans_SC53147218			FALSE
Ca21chr2_C_albicans_SC5314	7522	Ca21chr2_C_albicans_SC5314	7792	Ca21chr2_C_albicans_SC53147522	Ca21chr2_C_albicans_SC53147792				Ca21chr2_C_albicans_SC53147522			FALSE
Ca21chr2_C_albicans_SC5314	7632	Ca21chr2_C_albicans_SC5314	8450	Ca21chr2_C_albicans_SC53147632	Ca21chr2_C_albicans_SC53148450				Ca21chr2_C_albicans_SC53147632			FALSE
Ca21chr2_C_albicans_SC5314	7782	Ca21chr2_C_albicans_SC5314	8558	Ca21chr2_C_albicans_SC53147782	Ca21chr2_C_albicans_SC53148558				Ca21chr2_C_albicans_SC53147782			FALSE
Ca21chr2_C_albicans_SC5314	7788	Ca21chr2_C_albicans_SC5314	8897	Ca21chr2_C_albicans_SC53147788	Ca21chr2_C_albicans_SC53148897				Ca21chr2_C_albicans_SC53147788			FALSE
Ca21chr2_C_albicans_SC5314	7792	Ca21chr2_C_albicans_SC5314	9711	Ca21chr2_C_albicans_SC53147792	Ca21chr2_C_albicans_SC53149711				Ca21chr2_C_albicans_SC53147792			FALSE
Ca21chr2_C_albicans_SC5314	8450	Ca21chr2_C_albicans_SC5314	9834	Ca21chr2_C_albicans_SC53148450	Ca21chr2_C_albicans_SC53149834				Ca21chr2_C_albicans_SC53148450			FALSE
Ca21chr2_C_albicans_SC5314	8558	Ca21chr2_C_albicans_SC5314	10162	Ca21chr2_C_albicans_SC53148558	Ca21chr2_C_albicans_SC531410162				Ca21chr2_C_albicans_SC53148558			FALSE
Ca21chr2_C_albicans_SC5314	8897	Ca21chr2_C_albicans_SC5314	10329	Ca21chr2_C_albicans_SC53148897	Ca21chr2_C_albicans_SC531410329				Ca21chr2_C_albicans_SC53148897			FALSE
Ca21chr2_C_albicans_SC5314	9711	Ca21chr2_C_albicans_SC5314	10536	Ca21chr2_C_albicans_SC53149711	Ca21chr2_C_albicans_SC531410536				Ca21chr2_C_albicans_SC53149711			FALSE
Ca21chr2_C_albicans_SC5314	9834	Ca21chr2_C_albicans_SC5314	10542	Ca21chr2_C_albicans_SC53149834	Ca21chr2_C_albicans_SC531410542				Ca21chr2_C_albicans_SC53149834			FALSE
Ca21chr2_C_albicans_SC5314	10162	Ca21chr2_C_albicans_SC5314	10596	Ca21chr2_C_albicans_SC531410162	Ca21chr2_C_albicans_SC531410596				Ca21chr2_C_albicans_SC531410162			FALSE
Ca21chr2_C_albicans_SC5314	10329	Ca21chr2_C_albicans_SC5314	10599	Ca21chr2_C_albicans_SC531410329	Ca21chr2_C_albicans_SC531410599				Ca21chr2_C_albicans_SC531410329			FALSE
Ca21chr2_C_albicans_SC5314	10536	Ca21chr2_C_albicans_SC5314	10608	Ca21chr2_C_albicans_SC531410536	Ca21chr2_C_albicans_SC531410608				Ca21chr2_C_albicans_SC531410536			FALSE
Ca21chr2_C_albicans_SC5314	10542	Ca21chr2_C_albicans_SC5314	10614	Ca21chr2_C_albicans_SC531410542	Ca21chr2_C_albicans_SC531410614				Ca21chr2_C_albicans_SC531410542			FALSE
Ca21chr2_C_albicans_SC5314	10596	Ca21chr2_C_albicans_SC5314	10615	Ca21chr2_C_albicans_SC531410596	Ca21chr2_C_albicans_SC531410615				Ca21chr2_C_albicans_SC531410596			FALSE
Ca21chr2_C_albicans_SC5314	10599	Ca21chr2_C_albicans_SC5314	10616	Ca21chr2_C_albicans_SC531410599	Ca21chr2_C_albicans_SC531410616				Ca21chr2_C_albicans_SC531410599			FALSE
Ca21chr2_C_albicans_SC5314	10608	Ca21chr2_C_albicans_SC5314	10628	Ca21chr2_C_albicans_SC531410608	Ca21chr2_C_albicans_SC531410628				Ca21chr2_C_albicans_SC531410608			FALSE
Ca21chr2_C_albicans_SC5314	10614	Ca21chr2_C_albicans_SC5314	10632	Ca21chr2_C_albicans_SC531410614	Ca21chr2_C_albicans_SC531410632				Ca21chr2_C_albicans_SC531410614			FALSE
Ca21chr2_C_albicans_SC5314	10615	Ca21chr2_C_albicans_SC5314	10682	Ca21chr2_C_albicans_SC531410615	Ca21chr2_C_albicans_SC531410682				Ca21chr2_C_albicans_SC531410615			FALSE
Ca21chr2_C_albicans_SC5314	10616	Ca21chr2_C_albicans_SC5314	10702	Ca21chr2_C_albicans_SC531410616	Ca21chr2_C_albicans_SC531410702				Ca21chr2_C_albicans_SC531410616			FALSE
Ca21chr2_C_albicans_SC5314	10628	Ca21chr2_C_albicans_SC5314	10707	Ca21chr2_C_albicans_SC531410628	Ca21chr2_C_albicans_SC531410707				Ca21chr2_C_albicans_SC531410628			FALSE
Ca21chr2_C_albicans_SC5314	10632	Ca21chr2_C_albicans_SC5314	10719	Ca21chr2_C_albicans_SC531410632	Ca21chr2_C_albicans_SC531410719				Ca21chr2_C_albicans_SC531410632			FALSE
Ca21chr2_C_albicans_SC5314	10682	Ca21chr2_C_albicans_SC5314	10724	Ca21chr2_C_albicans_SC531410682	Ca21chr2_C_albicans_SC531410724				Ca21chr2_C_albicans_SC531410682			FALSE
Ca21chr2_C_albicans_SC5314	10702	Ca21chr2_C_albicans_SC5314	11262	Ca21chr2_C_albicans_SC531410702	Ca21chr2_C_albicans_SC531411262				Ca21chr2_C_albicans_SC531410702			FALSE
Ca21chr2_C_albicans_SC5314	10707	Ca21chr2_C_albicans_SC5314	11290	Ca21chr2_C_albicans_SC531410707	Ca21chr2_C_albicans_SC531411290				Ca21chr2_C_albicans_SC531410707			FALSE
Ca21chr2_C_albicans_SC5314	10719	Ca21chr2_C_albicans_SC5314	11388	Ca21chr2_C_albicans_SC531410719	Ca21chr2_C_albicans_SC531411388				Ca21chr2_C_albicans_SC531410719			FALSE
Ca21chr2_C_albicans_SC5314	10724	Ca21chr2_C_albicans_SC5314	11478	Ca21chr2_C_albicans_SC531410724	Ca21chr2_C_albicans_SC531411478				Ca21chr2_C_albicans_SC531410724			FALSE
Ca21chr2_C_albicans_SC5314	11262	Ca21chr2_C_albicans_SC5314	11667	Ca21chr2_C_albicans_SC531411262	Ca21chr2_C_albicans_SC531411667				Ca21chr2_C_albicans_SC531411262			FALSE
Ca21chr2_C_albicans_SC5314	11290	Ca21chr2_C_albicans_SC5314	11826	Ca21chr2_C_albicans_SC531411290	Ca21chr2_C_albicans_SC531411826				Ca21chr2_C_albicans_SC531411290			FALSE
Ca21chr2_C_albicans_SC5314	11388	Ca21chr2_C_albicans_SC5314	11917	Ca21chr2_C_albicans_SC531411388	Ca21chr2_C_albicans_SC531411917				Ca21chr2_C_albicans_SC531411388			FALSE
Ca21chr2_C_albicans_SC5314	11478	Ca21chr2_C_albicans_SC5314	12060	Ca21chr2_C_albicans_SC531411478	Ca21chr2_C_albicans_SC531412060				Ca21chr2_C_albicans_SC531411478			FALSE
Ca21chr2_C_albicans_SC5314	11667	Ca21chr2_C_albicans_SC5314	12091	Ca21chr2_C_albicans_SC531411667	Ca21chr2_C_albicans_SC531412091				Ca21chr2_C_albicans_SC531411667			FALSE
Ca21chr2_C_albicans_SC5314	11826	Ca21chr2_C_albicans_SC5314	12117	Ca21chr2_C_albicans_SC531411826	Ca21chr2_C_albicans_SC531412117				Ca21chr2_C_albicans_SC531411826			FALSE
Ca21chr2_C_albicans_SC5314	11917	Ca21chr2_C_albicans_SC5314	12178	Ca21chr2_C_albicans_SC531411917	Ca21chr2_C_albicans_SC531412178				Ca21chr2_C_albicans_SC531411917			FALSE
Ca21chr2_C_albicans_SC5314	12060	Ca21chr2_C_albicans_SC5314	12224	Ca21chr2_C_albicans_SC531412060	Ca21chr2_C_albicans_SC531412224				Ca21chr2_C_albicans_SC531412060			FALSE
Ca21chr2_C_albicans_SC5314	12091	Ca21chr2_C_albicans_SC5314	12641	Ca21chr2_C_albicans_SC531412091	Ca21chr2_C_albicans_SC531412641				Ca21chr2_C_albicans_SC531412091			FALSE
Ca21chr2_C_albicans_SC5314	12117	Ca21chr2_C_albicans_SC5314	12648	Ca21chr2_C_albicans_SC531412117	Ca21chr2_C_albicans_SC531412648				Ca21chr2_C_albicans_SC531412117			FALSE
Ca21chr2_C_albicans_SC5314	12178	Ca21chr2_C_albicans_SC5314	12710	Ca21chr2_C_albicans_SC531412178	Ca21chr2_C_albicans_SC531412710				Ca21chr2_C_albicans_SC531412178			FALSE
Ca21chr2_C_albicans_SC5314	12224	Ca21chr2_C_albicans_SC5314	12873	Ca21chr2_C_albicans_SC531412224	Ca21chr2_C_albicans_SC531412873				Ca21chr2_C_albicans_SC531412224			FALSE
Ca21chr2_C_albicans_SC5314	12641	Ca21chr2_C_albicans_SC5314	12874	Ca21chr2_C_albicans_SC531412641	Ca21chr2_C_albicans_SC531412874				Ca21chr2_C_albicans_SC531412641			FALSE
Ca21chr2_C_albicans_SC5314	12648	Ca21chr2_C_albicans_SC5314	12896	Ca21chr2_C_albicans_SC531412648	Ca21chr2_C_albicans_SC531412896				Ca21chr2_C_albicans_SC531412648			FALSE
Ca21chr2_C_albicans_SC5314	12710	Ca21chr2_C_albicans_SC5314	13002	Ca21chr2_C_albicans_SC531412710	Ca21chr2_C_albicans_SC531413002				Ca21chr2_C_albicans_SC531412710			FALSE
Ca21chr2_C_albicans_SC5314	12873	Ca21chr2_C_albicans_SC5314	13008	Ca21chr2_C_albicans_SC531412873	Ca21chr2_C_albicans_SC531413008				Ca21chr2_C_albicans_SC531412873			FALSE
Ca21chr2_C_albicans_SC5314	12874	Ca21chr2_C_albicans_SC5314	13031	Ca21chr2_C_albicans_SC531412874	Ca21chr2_C_albicans_SC531413031				Ca21chr2_C_albicans_SC531412874			FALSE
Ca21chr2_C_albicans_SC5314	12896	Ca21chr2_C_albicans_SC5314	13094	Ca21chr2_C_albicans_SC531412896	Ca21chr2_C_albicans_SC531413094				Ca21chr2_C_albicans_SC531412896			FALSE
Ca21chr2_C_albicans_SC5314	13002	Ca21chr2_C_albicans_SC5314	13202	Ca21chr2_C_albicans_SC531413002	Ca21chr2_C_albicans_SC531413202				Ca21chr2_C_albicans_SC531413002			FALSE
Ca21chr2_C_albicans_SC5314	13008	Ca21chr2_C_albicans_SC5314	13429	Ca21chr2_C_albicans_SC531413008	Ca21chr2_C_albicans_SC531413429				Ca21chr2_C_albicans_SC531413008			FALSE
Ca21chr2_C_albicans_SC5314	13031	Ca21chr2_C_albicans_SC5314	13441	Ca21chr2_C_albicans_SC531413031	Ca21chr2_C_albicans_SC531413441				Ca21chr2_C_albicans_SC531413031			FALSE
Ca21chr2_C_albicans_SC5314	13094	Ca21chr2_C_albicans_SC5314	13531	Ca21chr2_C_albicans_SC531413094	Ca21chr2_C_albicans_SC531413531				Ca21chr2_C_albicans_SC531413094			FALSE
Ca21chr2_C_albicans_SC5314	13202	Ca21chr2_C_albicans_SC5314	13549	Ca21chr2_C_albicans_SC531413202	Ca21chr2_C_albicans_SC531413549				Ca21chr2_C_albicans_SC531413202			FALSE
Ca21chr2_C_albicans_SC5314	13429	Ca21chr2_C_albicans_SC5314	13579	Ca21chr2_C_albicans_SC531413429	Ca21chr2_C_albicans_SC531413579				Ca21chr2_C_albicans_SC531413429			FALSE
Ca21chr2_C_albicans_SC5314	13441	Ca21chr2_C_albicans_SC5314	13624	Ca21chr2_C_albicans_SC531413441	Ca21chr2_C_albicans_SC531413624				Ca21chr2_C_albicans_SC531413441			FALSE
Ca21chr2_C_albicans_SC5314	13531	Ca21chr2_C_albicans_SC5314	14187	Ca21chr2_C_albicans_SC531413531	Ca21chr2_C_albicans_SC531414187				Ca21chr2_C_albicans_SC531413531			FALSE
Ca21chr2_C_albicans_SC5314	13549	Ca21chr2_C_albicans_SC5314	14243	Ca21chr2_C_albicans_SC531413549	Ca21chr2_C_albicans_SC531414243				Ca21chr2_C_albicans_SC531413549			FALSE
Ca21chr2_C_albicans_SC5314	13579	Ca21chr2_C_albicans_SC5314	14290	Ca21chr2_C_albicans_SC531413579	Ca21chr2_C_albicans_SC531414290				Ca21chr2_C_albicans_SC531413579			FALSE
Ca21chr2_C_albicans_SC5314	13624	Ca21chr2_C_albicans_SC5314	14314	Ca21chr2_C_albicans_SC531413624	Ca21chr2_C_albicans_SC531414314				Ca21chr2_C_albicans_SC531413624			FALSE
Ca21chr2_C_albicans_SC5314	14187	Ca21chr2_C_albicans_SC5314	14377	Ca21chr2_C_albicans_SC531414187	Ca21chr2_C_albicans_SC531414377				Ca21chr2_C_albicans_SC531414187			FALSE
Ca21chr2_C_albicans_SC5314	14243	Ca21chr2_C_albicans_SC5314	14924	Ca21chr2_C_albicans_SC531414243	Ca21chr2_C_albicans_SC531414924				Ca21chr2_C_albicans_SC531414243			FALSE
Ca21chr2_C_albicans_SC5314	14290	Ca21chr2_C_albicans_SC5314	14988	Ca21chr2_C_albicans_SC531414290	Ca21chr2_C_albicans_SC531414988				Ca21chr2_C_albicans_SC531414290			FALSE
Ca21chr2_C_albicans_SC5314	14314	Ca21chr2_C_albicans_SC5314	16833	Ca21chr2_C_albicans_SC531414314	Ca21chr2_C_albicans_SC531416833				Ca21chr2_C_albicans_SC531414314			FALSE
Ca21chr2_C_albicans_SC5314	14377	Ca21chr2_C_albicans_SC5314	17116	Ca21chr2_C_albicans_SC531414377	Ca21chr2_C_albicans_SC531417116				Ca21chr2_C_albicans_SC531414377			FALSE
Ca21chr2_C_albicans_SC5314	14924	Ca21chr2_C_albicans_SC5314	17380	Ca21chr2_C_albicans_SC531414924	Ca21chr2_C_albicans_SC531417380				Ca21chr2_C_albicans_SC531414924			FALSE
Ca21chr2_C_albicans_SC5314	14988	Ca21chr2_C_albicans_SC5314	18839	Ca21chr2_C_albicans_SC531414988	Ca21chr2_C_albicans_SC531418839				Ca21chr2_C_albicans_SC531414988			FALSE
Ca21chr2_C_albicans_SC5314	16833	Ca21chr2_C_albicans_SC5314	18984	Ca21chr2_C_albicans_SC531416833	Ca21chr2_C_albicans_SC531418984				Ca21chr2_C_albicans_SC531416833			FALSE
Ca21chr2_C_albicans_SC5314	17116	Ca21chr2_C_albicans_SC5314	20959	Ca21chr2_C_albicans_SC531417116	Ca21chr2_C_albicans_SC531420959				Ca21chr2_C_albicans_SC531417116			FALSE
Ca21chr2_C_albicans_SC5314	17380	Ca21chr2_C_albicans_SC5314	21088	Ca21chr2_C_albicans_SC531417380	Ca21chr2_C_albicans_SC531421088				Ca21chr2_C_albicans_SC531417380			FALSE
Ca21chr2_C_albicans_SC5314	18839	Ca21chr2_C_albicans_SC5314	21115	Ca21chr2_C_albicans_SC531418839	Ca21chr2_C_albicans_SC531421115				Ca21chr2_C_albicans_SC531418839			FALSE
Ca21chr2_C_albicans_SC5314	18984	Ca21chr2_C_albicans_SC5314	21133	Ca21chr2_C_albicans_SC531418984	Ca21chr2_C_albicans_SC531421133				Ca21chr2_C_albicans_SC531418984			FALSE
Ca21chr2_C_albicans_SC5314	20959	Ca21chr2_C_albicans_SC5314	21599	Ca21chr2_C_albicans_SC531420959	Ca21chr2_C_albicans_SC531421599				Ca21chr2_C_albicans_SC531420959			FALSE
Ca21chr2_C_albicans_SC5314	21088	Ca21chr2_C_albicans_SC5314	21886	Ca21chr2_C_albicans_SC531421088	Ca21chr2_C_albicans_SC531421886				Ca21chr2_C_albicans_SC531421088			FALSE
Ca21chr2_C_albicans_SC5314	21115	Ca21chr2_C_albicans_SC5314	22843	Ca21chr2_C_albicans_SC531421115	Ca21chr2_C_albicans_SC531422843				Ca21chr2_C_albicans_SC531421115			FALSE
Ca21chr2_C_albicans_SC5314	21133	Ca21chr2_C_albicans_SC5314	22898	Ca21chr2_C_albicans_SC531421133	Ca21chr2_C_albicans_SC531422898				Ca21chr2_C_albicans_SC531421133			FALSE
Ca21chr2_C_albicans_SC5314	21599	Ca21chr2_C_albicans_SC5314	22967	Ca21chr2_C_albicans_SC531421599	Ca21chr2_C_albicans_SC531422967				Ca21chr2_C_albicans_SC531421599			FALSE
Ca21chr2_C_albicans_SC5314	21886	Ca21chr2_C_albicans_SC5314	23015	Ca21chr2_C_albicans_SC531421886	Ca21chr2_C_albicans_SC531423015				Ca21chr2_C_albicans_SC531421886			FALSE
Ca21chr2_C_albicans_SC5314	22843	Ca21chr2_C_albicans_SC5314	23054	Ca21chr2_C_albicans_SC531422843	Ca21chr2_C_albicans_SC531423054				Ca21chr2_C_albicans_SC531422843			FALSE
Ca21chr2_C_albicans_SC5314	22898	Ca21chr2_C_albicans_SC5314	23105	Ca21chr2_C_albicans_SC531422898	Ca21chr2_C_albicans_SC531423105				Ca21chr2_C_albicans_SC531422898			FALSE
Ca21chr2_C_albicans_SC5314	22967	Ca21chr2_C_albicans_SC5314	23108	Ca21chr2_C_albicans_SC531422967	Ca21chr2_C_albicans_SC531423108				Ca21chr2_C_albicans_SC531422967			FALSE
Ca21chr2_C_albicans_SC5314	23015	Ca21chr2_C_albicans_SC5314	23303	Ca21chr2_C_albicans_SC531423015	Ca21chr2_C_albicans_SC531423303				Ca21chr2_C_albicans_SC531423015			FALSE
Ca21chr2_C_albicans_SC5314	23054	Ca21chr2_C_albicans_SC5314	23342	Ca21chr2_C_albicans_SC531423054	Ca21chr2_C_albicans_SC531423342				Ca21chr2_C_albicans_SC531423054			FALSE
Ca21chr2_C_albicans_SC5314	23105	Ca21chr2_C_albicans_SC5314	23668	Ca21chr2_C_albicans_SC531423105	Ca21chr2_C_albicans_SC531423668				Ca21chr2_C_albicans_SC531423105			FALSE
Ca21chr2_C_albicans_SC5314	23108	Ca21chr2_C_albicans_SC5314	23710	Ca21chr2_C_albicans_SC531423108	Ca21chr2_C_albicans_SC531423710				Ca21chr2_C_albicans_SC531423108			FALSE
Ca21chr2_C_albicans_SC5314	23303	Ca21chr2_C_albicans_SC5314	23912	Ca21chr2_C_albicans_SC531423303	Ca21chr2_C_albicans_SC531423912				Ca21chr2_C_albicans_SC531423303			FALSE
Ca21chr2_C_albicans_SC5314	23342	Ca21chr2_C_albicans_SC5314	23944	Ca21chr2_C_albicans_SC531423342	Ca21chr2_C_albicans_SC531423944				Ca21chr2_C_albicans_SC531423342			FALSE
Ca21chr2_C_albicans_SC5314	23668	Ca21chr2_C_albicans_SC5314	23986	Ca21chr2_C_albicans_SC531423668	Ca21chr2_C_albicans_SC531423986				Ca21chr2_C_albicans_SC531423668			FALSE
Ca21chr2_C_albicans_SC5314	23710	Ca21chr2_C_albicans_SC5314	24001	Ca21chr2_C_albicans_SC531423710	Ca21chr2_C_albicans_SC531424001				Ca21chr2_C_albicans_SC531423710			FALSE
Ca21chr2_C_albicans_SC5314	23912	Ca21chr2_C_albicans_SC5314	24322	Ca21chr2_C_albicans_SC531423912	Ca21chr2_C_albicans_SC531424322				Ca21chr2_C_albicans_SC531423912			FALSE
Ca21chr2_C_albicans_SC5314	23944	Ca21chr2_C_albicans_SC5314	24535	Ca21chr2_C_albicans_SC531423944	Ca21chr2_C_albicans_SC531424535				Ca21chr2_C_albicans_SC531423944			FALSE
Ca21chr2_C_albicans_SC5314	23986	Ca21chr2_C_albicans_SC5314	24622	Ca21chr2_C_albicans_SC531423986	Ca21chr2_C_albicans_SC531424622				Ca21chr2_C_albicans_SC531423986			FALSE
Ca21chr2_C_albicans_SC5314	24001	Ca21chr2_C_albicans_SC5314	24675	Ca21chr2_C_albicans_SC531424001	Ca21chr2_C_albicans_SC531424675				Ca21chr2_C_albicans_SC531424001			FALSE
Ca21chr2_C_albicans_SC5314	24322	Ca21chr2_C_albicans_SC5314	24775	Ca21chr2_C_albicans_SC531424322	Ca21chr2_C_albicans_SC531424775				Ca21chr2_C_albicans_SC531424322			FALSE
Ca21chr2_C_albicans_SC5314	24535	Ca21chr2_C_albicans_SC5314	27139	Ca21chr2_C_albicans_SC531424535	Ca21chr2_C_albicans_SC531427139				Ca21chr2_C_albicans_SC531424535			FALSE
Ca21chr2_C_albicans_SC5314	24622	Ca21chr2_C_albicans_SC5314	27603	Ca21chr2_C_albicans_SC531424622	Ca21chr2_C_albicans_SC531427603				Ca21chr2_C_albicans_SC531424622			FALSE
Ca21chr2_C_albicans_SC5314	24675	Ca21chr2_C_albicans_SC5314	27712	Ca21chr2_C_albicans_SC531424675	Ca21chr2_C_albicans_SC531427712				Ca21chr2_C_albicans_SC531424675			FALSE
Ca21chr2_C_albicans_SC5314	24775	Ca21chr2_C_albicans_SC5314	29214	Ca21chr2_C_albicans_SC531424775	Ca21chr2_C_albicans_SC531429214				Ca21chr2_C_albicans_SC531424775			FALSE
Ca21chr2_C_albicans_SC5314	27139	Ca21chr2_C_albicans_SC5314	30802	Ca21chr2_C_albicans_SC531427139	Ca21chr2_C_albicans_SC531430802				Ca21chr2_C_albicans_SC531427139			FALSE
Ca21chr2_C_albicans_SC5314	27603	Ca21chr2_C_albicans_SC5314	30882	Ca21chr2_C_albicans_SC531427603	Ca21chr2_C_albicans_SC531430882				Ca21chr2_C_albicans_SC531427603			FALSE
Ca21chr2_C_albicans_SC5314	27712	Ca21chr2_C_albicans_SC5314	30911	Ca21chr2_C_albicans_SC531427712	Ca21chr2_C_albicans_SC531430911				Ca21chr2_C_albicans_SC531427712			FALSE
Ca21chr2_C_albicans_SC5314	29214	Ca21chr2_C_albicans_SC5314	31682	Ca21chr2_C_albicans_SC531429214	Ca21chr2_C_albicans_SC531431682				Ca21chr2_C_albicans_SC531429214			FALSE
Ca21chr2_C_albicans_SC5314	30802	Ca21chr2_C_albicans_SC5314	31915	Ca21chr2_C_albicans_SC531430802	Ca21chr2_C_albicans_SC531431915				Ca21chr2_C_albicans_SC531430802			FALSE
Ca21chr2_C_albicans_SC5314	30882	Ca21chr2_C_albicans_SC5314	33823	Ca21chr2_C_albicans_SC531430882	Ca21chr2_C_albicans_SC531433823				Ca21chr2_C_albicans_SC531430882			FALSE
Ca21chr2_C_albicans_SC5314	30911	Ca21chr2_C_albicans_SC5314	34318	Ca21chr2_C_albicans_SC531430911	Ca21chr2_C_albicans_SC531434318				Ca21chr2_C_albicans_SC531430911			FALSE
Ca21chr2_C_albicans_SC5314	31682	Ca21chr2_C_albicans_SC5314	34622	Ca21chr2_C_albicans_SC531431682	Ca21chr2_C_albicans_SC531434622				Ca21chr2_C_albicans_SC531431682			FALSE
Ca21chr2_C_albicans_SC5314	31915	Ca21chr2_C_albicans_SC5314	34624	Ca21chr2_C_albicans_SC531431915	Ca21chr2_C_albicans_SC531434624				Ca21chr2_C_albicans_SC531431915			FALSE
Ca21chr2_C_albicans_SC5314	33823	Ca21chr2_C_albicans_SC5314	34633	Ca21chr2_C_albicans_SC531433823	Ca21chr2_C_albicans_SC531434633				Ca21chr2_C_albicans_SC531433823			FALSE
Ca21chr2_C_albicans_SC5314	34318	Ca21chr2_C_albicans_SC5314	34654	Ca21chr2_C_albicans_SC531434318	Ca21chr2_C_albicans_SC531434654				Ca21chr2_C_albicans_SC531434318			FALSE
Ca21chr2_C_albicans_SC5314	34622	Ca21chr2_C_albicans_SC5314	35591	Ca21chr2_C_albicans_SC531434622	Ca21chr2_C_albicans_SC531435591				Ca21chr2_C_albicans_SC531434622			FALSE
Ca21chr2_C_albicans_SC5314	34624	Ca21chr2_C_albicans_SC5314	36079	Ca21chr2_C_albicans_SC531434624	Ca21chr2_C_albicans_SC531436079				Ca21chr2_C_albicans_SC531434624			FALSE
Ca21chr2_C_albicans_SC5314	34633	Ca21chr2_C_albicans_SC5314	40794	Ca21chr2_C_albicans_SC531434633	Ca21chr2_C_albicans_SC531440794				Ca21chr2_C_albicans_SC531434633			FALSE
Ca21chr2_C_albicans_SC5314	34654	Ca21chr2_C_albicans_SC5314	41283	Ca21chr2_C_albicans_SC531434654	Ca21chr2_C_albicans_SC531441283				Ca21chr2_C_albicans_SC531434654			FALSE
Ca21chr2_C_albicans_SC5314	35591	Ca21chr2_C_albicans_SC5314	41576	Ca21chr2_C_albicans_SC531435591	Ca21chr2_C_albicans_SC531441576				Ca21chr2_C_albicans_SC531435591			FALSE
Ca21chr2_C_albicans_SC5314	36079	Ca21chr2_C_albicans_SC5314	44376	Ca21chr2_C_albicans_SC531436079	Ca21chr2_C_albicans_SC531444376				Ca21chr2_C_albicans_SC531436079			FALSE
Ca21chr2_C_albicans_SC5314	40794	Ca21chr2_C_albicans_SC5314	44654	Ca21chr2_C_albicans_SC531440794	Ca21chr2_C_albicans_SC531444654				Ca21chr2_C_albicans_SC531440794			FALSE
Ca21chr2_C_albicans_SC5314	41283	Ca21chr2_C_albicans_SC5314	44754	Ca21chr2_C_albicans_SC531441283	Ca21chr2_C_albicans_SC531444754				Ca21chr2_C_albicans_SC531441283			FALSE
Ca21chr2_C_albicans_SC5314	41576	Ca21chr2_C_albicans_SC5314	44762	Ca21chr2_C_albicans_SC531441576	Ca21chr2_C_albicans_SC531444762				Ca21chr2_C_albicans_SC531441576			FALSE
Ca21chr2_C_albicans_SC5314	44376	Ca21chr2_C_albicans_SC5314	44766	Ca21chr2_C_albicans_SC531444376	Ca21chr2_C_albicans_SC531444766				Ca21chr2_C_albicans_SC531444376			FALSE
Ca21chr2_C_albicans_SC5314	44654	Ca21chr2_C_albicans_SC5314	44779	Ca21chr2_C_albicans_SC531444654	Ca21chr2_C_albicans_SC531444779				Ca21chr2_C_albicans_SC531444654			FALSE
Ca21chr2_C_albicans_SC5314	44754	Ca21chr2_C_albicans_SC5314	44780	Ca21chr2_C_albicans_SC531444754	Ca21chr2_C_albicans_SC531444780				Ca21chr2_C_albicans_SC531444754			FALSE
Ca21chr2_C_albicans_SC5314	44762	Ca21chr2_C_albicans_SC5314	46036	Ca21chr2_C_albicans_SC531444762	Ca21chr2_C_albicans_SC531446036				Ca21chr2_C_albicans_SC531444762			FALSE
Ca21chr2_C_albicans_SC5314	44766	Ca21chr2_C_albicans_SC5314	46950	Ca21chr2_C_albicans_SC531444766	Ca21chr2_C_albicans_SC531446950				Ca21chr2_C_albicans_SC531444766			FALSE
Ca21chr2_C_albicans_SC5314	44779	Ca21chr2_C_albicans_SC5314	47167	Ca21chr2_C_albicans_SC531444779	Ca21chr2_C_albicans_SC531447167				Ca21chr2_C_albicans_SC531444779			FALSE
Ca21chr2_C_albicans_SC5314	44780	Ca21chr2_C_albicans_SC5314	47664	Ca21chr2_C_albicans_SC531444780	Ca21chr2_C_albicans_SC531447664				Ca21chr2_C_albicans_SC531444780			FALSE
Ca21chr2_C_albicans_SC5314	46036	Ca21chr2_C_albicans_SC5314	48685	Ca21chr2_C_albicans_SC531446036	Ca21chr2_C_albicans_SC531448685				Ca21chr2_C_albicans_SC531446036			FALSE
Ca21chr2_C_albicans_SC5314	46950	Ca21chr2_C_albicans_SC5314	48775	Ca21chr2_C_albicans_SC531446950	Ca21chr2_C_albicans_SC531448775				Ca21chr2_C_albicans_SC531446950			FALSE
Ca21chr2_C_albicans_SC5314	47167	Ca21chr2_C_albicans_SC5314	50410	Ca21chr2_C_albicans_SC531447167	Ca21chr2_C_albicans_SC531450410				Ca21chr2_C_albicans_SC531447167			FALSE
Ca21chr2_C_albicans_SC5314	47664	Ca21chr2_C_albicans_SC5314	52656	Ca21chr2_C_albicans_SC531447664	Ca21chr2_C_albicans_SC531452656				Ca21chr2_C_albicans_SC531447664			FALSE
Ca21chr2_C_albicans_SC5314	48685	Ca21chr2_C_albicans_SC5314	57803	Ca21chr2_C_albicans_SC531448685	Ca21chr2_C_albicans_SC531457803				Ca21chr2_C_albicans_SC531448685			FALSE
Ca21chr2_C_albicans_SC5314	48775	Ca21chr2_C_albicans_SC5314	60915	Ca21chr2_C_albicans_SC531448775	Ca21chr2_C_albicans_SC531460915				Ca21chr2_C_albicans_SC531448775			FALSE
Ca21chr2_C_albicans_SC5314	50410	Ca21chr2_C_albicans_SC5314	61615	Ca21chr2_C_albicans_SC531450410	Ca21chr2_C_albicans_SC531461615				Ca21chr2_C_albicans_SC531450410			FALSE
Ca21chr2_C_albicans_SC5314	52656	Ca21chr2_C_albicans_SC5314	64314	Ca21chr2_C_albicans_SC531452656	Ca21chr2_C_albicans_SC531464314				Ca21chr2_C_albicans_SC531452656			FALSE
Ca21chr2_C_albicans_SC5314	57803	Ca21chr2_C_albicans_SC5314	64374	Ca21chr2_C_albicans_SC531457803	Ca21chr2_C_albicans_SC531464374				Ca21chr2_C_albicans_SC531457803			FALSE
Ca21chr2_C_albicans_SC5314	60915	Ca21chr2_C_albicans_SC5314	64377	Ca21chr2_C_albicans_SC531460915	Ca21chr2_C_albicans_SC531464377				Ca21chr2_C_albicans_SC531460915			FALSE
Ca21chr2_C_albicans_SC5314	61615	Ca21chr2_C_albicans_SC5314	64395	Ca21chr2_C_albicans_SC531461615	Ca21chr2_C_albicans_SC531464395				Ca21chr2_C_albicans_SC531461615			FALSE
Ca21chr2_C_albicans_SC5314	64314	Ca21chr2_C_albicans_SC5314	64404	Ca21chr2_C_albicans_SC531464314	Ca21chr2_C_albicans_SC531464404				Ca21chr2_C_albicans_SC531464314			FALSE
Ca21chr2_C_albicans_SC5314	64374	Ca21chr2_C_albicans_SC5314	69245	Ca21chr2_C_albicans_SC531464374	Ca21chr2_C_albicans_SC531469245				Ca21chr2_C_albicans_SC531464374			FALSE
Ca21chr2_C_albicans_SC5314	64377	Ca21chr2_C_albicans_SC5314	69335	Ca21chr2_C_albicans_SC531464377	Ca21chr2_C_albicans_SC531469335				Ca21chr2_C_albicans_SC531464377			FALSE
Ca21chr2_C_albicans_SC5314	64395	Ca21chr2_C_albicans_SC5314	69447	Ca21chr2_C_albicans_SC531464395	Ca21chr2_C_albicans_SC531469447				Ca21chr2_C_albicans_SC531464395			FALSE
Ca21chr2_C_albicans_SC5314	64404	Ca21chr2_C_albicans_SC5314	69640	Ca21chr2_C_albicans_SC531464404	Ca21chr2_C_albicans_SC531469640				Ca21chr2_C_albicans_SC531464404			FALSE
Ca21chr2_C_albicans_SC5314	69245	Ca21chr2_C_albicans_SC5314	70677	Ca21chr2_C_albicans_SC531469245	Ca21chr2_C_albicans_SC531470677				Ca21chr2_C_albicans_SC531469245			FALSE
Ca21chr2_C_albicans_SC5314	69335	Ca21chr2_C_albicans_SC5314	71363	Ca21chr2_C_albicans_SC531469335	Ca21chr2_C_albicans_SC531471363				Ca21chr2_C_albicans_SC531469335			FALSE
Ca21chr2_C_albicans_SC5314	69447	Ca21chr2_C_albicans_SC5314	73614	Ca21chr2_C_albicans_SC531469447	Ca21chr2_C_albicans_SC531473614				Ca21chr2_C_albicans_SC531469447			FALSE
Ca21chr2_C_albicans_SC5314	69640	Ca21chr2_C_albicans_SC5314	73706	Ca21chr2_C_albicans_SC531469640	Ca21chr2_C_albicans_SC531473706				Ca21chr2_C_albicans_SC531469640			FALSE
Ca21chr2_C_albicans_SC5314	70677	Ca21chr2_C_albicans_SC5314	74425	Ca21chr2_C_albicans_SC531470677	Ca21chr2_C_albicans_SC531474425				Ca21chr2_C_albicans_SC531470677			FALSE
Ca21chr2_C_albicans_SC5314	71363	Ca21chr2_C_albicans_SC5314	74647	Ca21chr2_C_albicans_SC531471363	Ca21chr2_C_albicans_SC531474647				Ca21chr2_C_albicans_SC531471363			FALSE
Ca21chr2_C_albicans_SC5314	73614	Ca21chr2_C_albicans_SC5314	75963	Ca21chr2_C_albicans_SC531473614	Ca21chr2_C_albicans_SC531475963				Ca21chr2_C_albicans_SC531473614			FALSE
Ca21chr2_C_albicans_SC5314	73706	Ca21chr2_C_albicans_SC5314	76247	Ca21chr2_C_albicans_SC531473706	Ca21chr2_C_albicans_SC531476247				Ca21chr2_C_albicans_SC531473706			FALSE
Ca21chr2_C_albicans_SC5314	74425	Ca21chr2_C_albicans_SC5314	76635	Ca21chr2_C_albicans_SC531474425	Ca21chr2_C_albicans_SC531476635				Ca21chr2_C_albicans_SC531474425			FALSE
Ca21chr2_C_albicans_SC5314	74647	Ca21chr2_C_albicans_SC5314	76658	Ca21chr2_C_albicans_SC531474647	Ca21chr2_C_albicans_SC531476658				Ca21chr2_C_albicans_SC531474647			FALSE
Ca21chr2_C_albicans_SC5314	75963	Ca21chr2_C_albicans_SC5314	77022	Ca21chr2_C_albicans_SC531475963	Ca21chr2_C_albicans_SC531477022				Ca21chr2_C_albicans_SC531475963			FALSE
Ca21chr2_C_albicans_SC5314	76247	Ca21chr2_C_albicans_SC5314	78385	Ca21chr2_C_albicans_SC531476247	Ca21chr2_C_albicans_SC531478385				Ca21chr2_C_albicans_SC531476247			FALSE
Ca21chr2_C_albicans_SC5314	76635	Ca21chr2_C_albicans_SC5314	78421	Ca21chr2_C_albicans_SC531476635	Ca21chr2_C_albicans_SC531478421				Ca21chr2_C_albicans_SC531476635			FALSE
Ca21chr2_C_albicans_SC5314	76658	Ca21chr2_C_albicans_SC5314	78475	Ca21chr2_C_albicans_SC531476658	Ca21chr2_C_albicans_SC531478475				Ca21chr2_C_albicans_SC531476658			FALSE
Ca21chr2_C_albicans_SC5314	77022	Ca21chr2_C_albicans_SC5314	78512	Ca21chr2_C_albicans_SC531477022	Ca21chr2_C_albicans_SC531478512				Ca21chr2_C_albicans_SC531477022			FALSE
Ca21chr2_C_albicans_SC5314	78385	Ca21chr2_C_albicans_SC5314	78991	Ca21chr2_C_albicans_SC531478385	Ca21chr2_C_albicans_SC531478991				Ca21chr2_C_albicans_SC531478385			FALSE
Ca21chr2_C_albicans_SC5314	78421	Ca21chr2_C_albicans_SC5314	79105	Ca21chr2_C_albicans_SC531478421	Ca21chr2_C_albicans_SC531479105				Ca21chr2_C_albicans_SC531478421			FALSE
Ca21chr2_C_albicans_SC5314	78475	Ca21chr2_C_albicans_SC5314	79231	Ca21chr2_C_albicans_SC531478475	Ca21chr2_C_albicans_SC531479231				Ca21chr2_C_albicans_SC531478475			FALSE
Ca21chr2_C_albicans_SC5314	78512	Ca21chr2_C_albicans_SC5314	79976	Ca21chr2_C_albicans_SC531478512	Ca21chr2_C_albicans_SC531479976				Ca21chr2_C_albicans_SC531478512			FALSE
Ca21chr2_C_albicans_SC5314	78991	Ca21chr2_C_albicans_SC5314	81782	Ca21chr2_C_albicans_SC531478991	Ca21chr2_C_albicans_SC531481782				Ca21chr2_C_albicans_SC531478991			FALSE
Ca21chr2_C_albicans_SC5314	79105	Ca21chr2_C_albicans_SC5314	85458	Ca21chr2_C_albicans_SC531479105	Ca21chr2_C_albicans_SC531485458				Ca21chr2_C_albicans_SC531479105			FALSE
Ca21chr2_C_albicans_SC5314	79231	Ca21chr2_C_albicans_SC5314	95772	Ca21chr2_C_albicans_SC531479231	Ca21chr2_C_albicans_SC531495772				Ca21chr2_C_albicans_SC531479231			FALSE
Ca21chr2_C_albicans_SC5314	79976	Ca21chr2_C_albicans_SC5314	95804	Ca21chr2_C_albicans_SC531479976	Ca21chr2_C_albicans_SC531495804				Ca21chr2_C_albicans_SC531479976			FALSE
Ca21chr2_C_albicans_SC5314	81782	Ca21chr2_C_albicans_SC5314	97405	Ca21chr2_C_albicans_SC531481782	Ca21chr2_C_albicans_SC531497405				Ca21chr2_C_albicans_SC531481782			FALSE
Ca21chr2_C_albicans_SC5314	85458	Ca21chr2_C_albicans_SC5314	102318	Ca21chr2_C_albicans_SC531485458	Ca21chr2_C_albicans_SC5314102318				Ca21chr2_C_albicans_SC531485458			FALSE
Ca21chr2_C_albicans_SC5314	95772	Ca21chr2_C_albicans_SC5314	102320	Ca21chr2_C_albicans_SC531495772	Ca21chr2_C_albicans_SC5314102320				Ca21chr2_C_albicans_SC531495772			FALSE
Ca21chr2_C_albicans_SC5314	95804	Ca21chr2_C_albicans_SC5314	103245	Ca21chr2_C_albicans_SC531495804	Ca21chr2_C_albicans_SC5314103245				Ca21chr2_C_albicans_SC531495804			FALSE
Ca21chr2_C_albicans_SC5314	97405	Ca21chr2_C_albicans_SC5314	103910	Ca21chr2_C_albicans_SC531497405	Ca21chr2_C_albicans_SC5314103910				Ca21chr2_C_albicans_SC531497405			FALSE
Ca21chr2_C_albicans_SC5314	102318	Ca21chr2_C_albicans_SC5314	103988	Ca21chr2_C_albicans_SC5314102318	Ca21chr2_C_albicans_SC5314103988				Ca21chr2_C_albicans_SC5314102318			FALSE
Ca21chr2_C_albicans_SC5314	102320	Ca21chr2_C_albicans_SC5314	104009	Ca21chr2_C_albicans_SC5314102320	Ca21chr2_C_albicans_SC5314104009				Ca21chr2_C_albicans_SC5314102320			FALSE
Ca21chr2_C_albicans_SC5314	103245	Ca21chr2_C_albicans_SC5314	107465	Ca21chr2_C_albicans_SC5314103245	Ca21chr2_C_albicans_SC5314107465				Ca21chr2_C_albicans_SC5314103245			FALSE
Ca21chr2_C_albicans_SC5314	103910	Ca21chr2_C_albicans_SC5314	107612	Ca21chr2_C_albicans_SC5314103910	Ca21chr2_C_albicans_SC5314107612				Ca21chr2_C_albicans_SC5314103910			FALSE
Ca21chr2_C_albicans_SC5314	103988	Ca21chr2_C_albicans_SC5314	115531	Ca21chr2_C_albicans_SC5314103988	Ca21chr2_C_albicans_SC5314115531				Ca21chr2_C_albicans_SC5314103988			FALSE
Ca21chr2_C_albicans_SC5314	104009	Ca21chr2_C_albicans_SC5314	115564	Ca21chr2_C_albicans_SC5314104009	Ca21chr2_C_albicans_SC5314115564				Ca21chr2_C_albicans_SC5314104009			FALSE
Ca21chr2_C_albicans_SC5314	107465	Ca21chr2_C_albicans_SC5314	118400	Ca21chr2_C_albicans_SC5314107465	Ca21chr2_C_albicans_SC5314118400				Ca21chr2_C_albicans_SC5314107465			FALSE
Ca21chr2_C_albicans_SC5314	107612	Ca21chr2_C_albicans_SC5314	118826	Ca21chr2_C_albicans_SC5314107612	Ca21chr2_C_albicans_SC5314118826				Ca21chr2_C_albicans_SC5314107612			FALSE
Ca21chr2_C_albicans_SC5314	115531	Ca21chr2_C_albicans_SC5314	119997	Ca21chr2_C_albicans_SC5314115531	Ca21chr2_C_albicans_SC5314119997				Ca21chr2_C_albicans_SC5314115531			FALSE
Ca21chr2_C_albicans_SC5314	115564	Ca21chr2_C_albicans_SC5314	120037	Ca21chr2_C_albicans_SC5314115564	Ca21chr2_C_albicans_SC5314120037				Ca21chr2_C_albicans_SC5314115564			FALSE
Ca21chr2_C_albicans_SC5314	118400	Ca21chr2_C_albicans_SC5314	121067	Ca21chr2_C_albicans_SC5314118400	Ca21chr2_C_albicans_SC5314121067				Ca21chr2_C_albicans_SC5314118400			FALSE
Ca21chr2_C_albicans_SC5314	118826	Ca21chr2_C_albicans_SC5314	121769	Ca21chr2_C_albicans_SC5314118826	Ca21chr2_C_albicans_SC5314121769				Ca21chr2_C_albicans_SC5314118826			FALSE
Ca21chr2_C_albicans_SC5314	119997	Ca21chr2_C_albicans_SC5314	122459	Ca21chr2_C_albicans_SC5314119997	Ca21chr2_C_albicans_SC5314122459				Ca21chr2_C_albicans_SC5314119997			FALSE
Ca21chr2_C_albicans_SC5314	120037	Ca21chr2_C_albicans_SC5314	124274	Ca21chr2_C_albicans_SC5314120037	Ca21chr2_C_albicans_SC5314124274				Ca21chr2_C_albicans_SC5314120037			FALSE
Ca21chr2_C_albicans_SC5314	121067	Ca21chr2_C_albicans_SC5314	125467	Ca21chr2_C_albicans_SC5314121067	Ca21chr2_C_albicans_SC5314125467				Ca21chr2_C_albicans_SC5314121067			FALSE
Ca21chr2_C_albicans_SC5314	121769	Ca21chr2_C_albicans_SC5314	125619	Ca21chr2_C_albicans_SC5314121769	Ca21chr2_C_albicans_SC5314125619				Ca21chr2_C_albicans_SC5314121769			FALSE
Ca21chr2_C_albicans_SC5314	122459	Ca21chr2_C_albicans_SC5314	125667	Ca21chr2_C_albicans_SC5314122459	Ca21chr2_C_albicans_SC5314125667				Ca21chr2_C_albicans_SC5314122459			FALSE
Ca21chr2_C_albicans_SC5314	124274	Ca21chr2_C_albicans_SC5314	125674	Ca21chr2_C_albicans_SC5314124274	Ca21chr2_C_albicans_SC5314125674				Ca21chr2_C_albicans_SC5314124274			FALSE
Ca21chr2_C_albicans_SC5314	125467	Ca21chr2_C_albicans_SC5314	125940	Ca21chr2_C_albicans_SC5314125467	Ca21chr2_C_albicans_SC5314125940				Ca21chr2_C_albicans_SC5314125467			FALSE
Ca21chr2_C_albicans_SC5314	125619	Ca21chr2_C_albicans_SC5314	126069	Ca21chr2_C_albicans_SC5314125619	Ca21chr2_C_albicans_SC5314126069				Ca21chr2_C_albicans_SC5314125619			FALSE
Ca21chr2_C_albicans_SC5314	125667	Ca21chr2_C_albicans_SC5314	126126	Ca21chr2_C_albicans_SC5314125667	Ca21chr2_C_albicans_SC5314126126				Ca21chr2_C_albicans_SC5314125667			FALSE
Ca21chr2_C_albicans_SC5314	125674	Ca21chr2_C_albicans_SC5314	126813	Ca21chr2_C_albicans_SC5314125674	Ca21chr2_C_albicans_SC5314126813				Ca21chr2_C_albicans_SC5314125674			FALSE
Ca21chr2_C_albicans_SC5314	125940	Ca21chr2_C_albicans_SC5314	128255	Ca21chr2_C_albicans_SC5314125940	Ca21chr2_C_albicans_SC5314128255				Ca21chr2_C_albicans_SC5314125940			FALSE
Ca21chr2_C_albicans_SC5314	126069	Ca21chr2_C_albicans_SC5314	128378	Ca21chr2_C_albicans_SC5314126069	Ca21chr2_C_albicans_SC5314128378				Ca21chr2_C_albicans_SC5314126069			FALSE
Ca21chr2_C_albicans_SC5314	126126	Ca21chr2_C_albicans_SC5314	136340	Ca21chr2_C_albicans_SC5314126126	Ca21chr2_C_albicans_SC5314136340				Ca21chr2_C_albicans_SC5314126126			FALSE
Ca21chr2_C_albicans_SC5314	126813	Ca21chr2_C_albicans_SC5314	136943	Ca21chr2_C_albicans_SC5314126813	Ca21chr2_C_albicans_SC5314136943				Ca21chr2_C_albicans_SC5314126813			FALSE
Ca21chr2_C_albicans_SC5314	128255	Ca21chr2_C_albicans_SC5314	140496	Ca21chr2_C_albicans_SC5314128255	Ca21chr2_C_albicans_SC5314140496				Ca21chr2_C_albicans_SC5314128255			FALSE
Ca21chr2_C_albicans_SC5314	128378	Ca21chr2_C_albicans_SC5314	140575	Ca21chr2_C_albicans_SC5314128378	Ca21chr2_C_albicans_SC5314140575				Ca21chr2_C_albicans_SC5314128378			FALSE
Ca21chr2_C_albicans_SC5314	136340	Ca21chr2_C_albicans_SC5314	140819	Ca21chr2_C_albicans_SC5314136340	Ca21chr2_C_albicans_SC5314140819				Ca21chr2_C_albicans_SC5314136340			FALSE
Ca21chr2_C_albicans_SC5314	136943	Ca21chr2_C_albicans_SC5314	141086	Ca21chr2_C_albicans_SC5314136943	Ca21chr2_C_albicans_SC5314141086				Ca21chr2_C_albicans_SC5314136943			FALSE
Ca21chr2_C_albicans_SC5314	140496	Ca21chr2_C_albicans_SC5314	141266	Ca21chr2_C_albicans_SC5314140496	Ca21chr2_C_albicans_SC5314141266				Ca21chr2_C_albicans_SC5314140496			FALSE
Ca21chr2_C_albicans_SC5314	140575	Ca21chr2_C_albicans_SC5314	141401	Ca21chr2_C_albicans_SC5314140575	Ca21chr2_C_albicans_SC5314141401				Ca21chr2_C_albicans_SC5314140575			FALSE
Ca21chr2_C_albicans_SC5314	140819	Ca21chr2_C_albicans_SC5314	141699	Ca21chr2_C_albicans_SC5314140819	Ca21chr2_C_albicans_SC5314141699				Ca21chr2_C_albicans_SC5314140819			FALSE
Ca21chr2_C_albicans_SC5314	141086	Ca21chr2_C_albicans_SC5314	142274	Ca21chr2_C_albicans_SC5314141086	Ca21chr2_C_albicans_SC5314142274				Ca21chr2_C_albicans_SC5314141086			FALSE
Ca21chr2_C_albicans_SC5314	141266	Ca21chr2_C_albicans_SC5314	143766	Ca21chr2_C_albicans_SC5314141266	Ca21chr2_C_albicans_SC5314143766				Ca21chr2_C_albicans_SC5314141266			FALSE
Ca21chr2_C_albicans_SC5314	141401	Ca21chr2_C_albicans_SC5314	144250	Ca21chr2_C_albicans_SC5314141401	Ca21chr2_C_albicans_SC5314144250				Ca21chr2_C_albicans_SC5314141401			FALSE
Ca21chr2_C_albicans_SC5314	141699	Ca21chr2_C_albicans_SC5314	144556	Ca21chr2_C_albicans_SC5314141699	Ca21chr2_C_albicans_SC5314144556				Ca21chr2_C_albicans_SC5314141699			FALSE
Ca21chr2_C_albicans_SC5314	142274	Ca21chr2_C_albicans_SC5314	150110	Ca21chr2_C_albicans_SC5314142274	Ca21chr2_C_albicans_SC5314150110				Ca21chr2_C_albicans_SC5314142274			FALSE
Ca21chr2_C_albicans_SC5314	143766	Ca21chr2_C_albicans_SC5314	150149	Ca21chr2_C_albicans_SC5314143766	Ca21chr2_C_albicans_SC5314150149				Ca21chr2_C_albicans_SC5314143766			FALSE
Ca21chr2_C_albicans_SC5314	144250	Ca21chr2_C_albicans_SC5314	151247	Ca21chr2_C_albicans_SC5314144250	Ca21chr2_C_albicans_SC5314151247				Ca21chr2_C_albicans_SC5314144250			FALSE
Ca21chr2_C_albicans_SC5314	144556	Ca21chr2_C_albicans_SC5314	151366	Ca21chr2_C_albicans_SC5314144556	Ca21chr2_C_albicans_SC5314151366				Ca21chr2_C_albicans_SC5314144556			FALSE
Ca21chr2_C_albicans_SC5314	150110	Ca21chr2_C_albicans_SC5314	151622	Ca21chr2_C_albicans_SC5314150110	Ca21chr2_C_albicans_SC5314151622				Ca21chr2_C_albicans_SC5314150110			FALSE
Ca21chr2_C_albicans_SC5314	150149	Ca21chr2_C_albicans_SC5314	151779	Ca21chr2_C_albicans_SC5314150149	Ca21chr2_C_albicans_SC5314151779				Ca21chr2_C_albicans_SC5314150149			FALSE
Ca21chr2_C_albicans_SC5314	151247	Ca21chr2_C_albicans_SC5314	153033	Ca21chr2_C_albicans_SC5314151247	Ca21chr2_C_albicans_SC5314153033				Ca21chr2_C_albicans_SC5314151247			FALSE
Ca21chr2_C_albicans_SC5314	151366	Ca21chr2_C_albicans_SC5314	153152	Ca21chr2_C_albicans_SC5314151366	Ca21chr2_C_albicans_SC5314153152				Ca21chr2_C_albicans_SC5314151366			FALSE
Ca21chr2_C_albicans_SC5314	151622	Ca21chr2_C_albicans_SC5314	153400	Ca21chr2_C_albicans_SC5314151622	Ca21chr2_C_albicans_SC5314153400				Ca21chr2_C_albicans_SC5314151622			FALSE
Ca21chr2_C_albicans_SC5314	151779	Ca21chr2_C_albicans_SC5314	153479	Ca21chr2_C_albicans_SC5314151779	Ca21chr2_C_albicans_SC5314153479				Ca21chr2_C_albicans_SC5314151779			FALSE
Ca21chr2_C_albicans_SC5314	153033	Ca21chr2_C_albicans_SC5314	153540	Ca21chr2_C_albicans_SC5314153033	Ca21chr2_C_albicans_SC5314153540				Ca21chr2_C_albicans_SC5314153033			FALSE
Ca21chr2_C_albicans_SC5314	153152	Ca21chr2_C_albicans_SC5314	154420	Ca21chr2_C_albicans_SC5314153152	Ca21chr2_C_albicans_SC5314154420				Ca21chr2_C_albicans_SC5314153152			FALSE
Ca21chr2_C_albicans_SC5314	153400	Ca21chr2_C_albicans_SC5314	154923	Ca21chr2_C_albicans_SC5314153400	Ca21chr2_C_albicans_SC5314154923				Ca21chr2_C_albicans_SC5314153400			FALSE
Ca21chr2_C_albicans_SC5314	153479	Ca21chr2_C_albicans_SC5314	155016	Ca21chr2_C_albicans_SC5314153479	Ca21chr2_C_albicans_SC5314155016				Ca21chr2_C_albicans_SC5314153479			FALSE
Ca21chr2_C_albicans_SC5314	153540	Ca21chr2_C_albicans_SC5314	155158	Ca21chr2_C_albicans_SC5314153540	Ca21chr2_C_albicans_SC5314155158				Ca21chr2_C_albicans_SC5314153540			FALSE
Ca21chr2_C_albicans_SC5314	154420	Ca21chr2_C_albicans_SC5314	155889	Ca21chr2_C_albicans_SC5314154420	Ca21chr2_C_albicans_SC5314155889				Ca21chr2_C_albicans_SC5314154420			FALSE
Ca21chr2_C_albicans_SC5314	154923	Ca21chr2_C_albicans_SC5314	155913	Ca21chr2_C_albicans_SC5314154923	Ca21chr2_C_albicans_SC5314155913				Ca21chr2_C_albicans_SC5314154923			FALSE
Ca21chr2_C_albicans_SC5314	155016	Ca21chr2_C_albicans_SC5314	156063	Ca21chr2_C_albicans_SC5314155016	Ca21chr2_C_albicans_SC5314156063				Ca21chr2_C_albicans_SC5314155016			FALSE
Ca21chr2_C_albicans_SC5314	155158	Ca21chr2_C_albicans_SC5314	156428	Ca21chr2_C_albicans_SC5314155158	Ca21chr2_C_albicans_SC5314156428				Ca21chr2_C_albicans_SC5314155158			FALSE
Ca21chr2_C_albicans_SC5314	155889	Ca21chr2_C_albicans_SC5314	156656	Ca21chr2_C_albicans_SC5314155889	Ca21chr2_C_albicans_SC5314156656				Ca21chr2_C_albicans_SC5314155889			FALSE
Ca21chr2_C_albicans_SC5314	155913	Ca21chr2_C_albicans_SC5314	156749	Ca21chr2_C_albicans_SC5314155913	Ca21chr2_C_albicans_SC5314156749				Ca21chr2_C_albicans_SC5314155913			FALSE
Ca21chr2_C_albicans_SC5314	156063	Ca21chr2_C_albicans_SC5314	156766	Ca21chr2_C_albicans_SC5314156063	Ca21chr2_C_albicans_SC5314156766				Ca21chr2_C_albicans_SC5314156063			FALSE
Ca21chr2_C_albicans_SC5314	156428	Ca21chr2_C_albicans_SC5314	156817	Ca21chr2_C_albicans_SC5314156428	Ca21chr2_C_albicans_SC5314156817				Ca21chr2_C_albicans_SC5314156428			FALSE
Ca21chr2_C_albicans_SC5314	156656	Ca21chr2_C_albicans_SC5314	156859	Ca21chr2_C_albicans_SC5314156656	Ca21chr2_C_albicans_SC5314156859				Ca21chr2_C_albicans_SC5314156656			FALSE
Ca21chr2_C_albicans_SC5314	156749	Ca21chr2_C_albicans_SC5314	158248	Ca21chr2_C_albicans_SC5314156749	Ca21chr2_C_albicans_SC5314158248				Ca21chr2_C_albicans_SC5314156749			FALSE
Ca21chr2_C_albicans_SC5314	156766	Ca21chr2_C_albicans_SC5314	158380	Ca21chr2_C_albicans_SC5314156766	Ca21chr2_C_albicans_SC5314158380				Ca21chr2_C_albicans_SC5314156766			FALSE
Ca21chr2_C_albicans_SC5314	156817	Ca21chr2_C_albicans_SC5314	158872	Ca21chr2_C_albicans_SC5314156817	Ca21chr2_C_albicans_SC5314158872				Ca21chr2_C_albicans_SC5314156817			FALSE
Ca21chr2_C_albicans_SC5314	156859	Ca21chr2_C_albicans_SC5314	159064	Ca21chr2_C_albicans_SC5314156859	Ca21chr2_C_albicans_SC5314159064				Ca21chr2_C_albicans_SC5314156859			FALSE
Ca21chr2_C_albicans_SC5314	158248	Ca21chr2_C_albicans_SC5314	159194	Ca21chr2_C_albicans_SC5314158248	Ca21chr2_C_albicans_SC5314159194				Ca21chr2_C_albicans_SC5314158248			FALSE
Ca21chr2_C_albicans_SC5314	158380	Ca21chr2_C_albicans_SC5314	163129	Ca21chr2_C_albicans_SC5314158380	Ca21chr2_C_albicans_SC5314163129				Ca21chr2_C_albicans_SC5314158380			FALSE
Ca21chr2_C_albicans_SC5314	158872	Ca21chr2_C_albicans_SC5314	163131	Ca21chr2_C_albicans_SC5314158872	Ca21chr2_C_albicans_SC5314163131				Ca21chr2_C_albicans_SC5314158872			FALSE
Ca21chr2_C_albicans_SC5314	159064	Ca21chr2_C_albicans_SC5314	163136	Ca21chr2_C_albicans_SC5314159064	Ca21chr2_C_albicans_SC5314163136				Ca21chr2_C_albicans_SC5314159064			FALSE
Ca21chr2_C_albicans_SC5314	159194	Ca21chr2_C_albicans_SC5314	163146	Ca21chr2_C_albicans_SC5314159194	Ca21chr2_C_albicans_SC5314163146				Ca21chr2_C_albicans_SC5314159194			FALSE
Ca21chr2_C_albicans_SC5314	163129	Ca21chr2_C_albicans_SC5314	163150	Ca21chr2_C_albicans_SC5314163129	Ca21chr2_C_albicans_SC5314163150				Ca21chr2_C_albicans_SC5314163129			FALSE
Ca21chr2_C_albicans_SC5314	163131	Ca21chr2_C_albicans_SC5314	163153	Ca21chr2_C_albicans_SC5314163131	Ca21chr2_C_albicans_SC5314163153				Ca21chr2_C_albicans_SC5314163131			FALSE
Ca21chr2_C_albicans_SC5314	163136	Ca21chr2_C_albicans_SC5314	163430	Ca21chr2_C_albicans_SC5314163136	Ca21chr2_C_albicans_SC5314163430				Ca21chr2_C_albicans_SC5314163136			FALSE
Ca21chr2_C_albicans_SC5314	163144	Ca21chr2_C_albicans_SC5314	164543	Ca21chr2_C_albicans_SC5314163144	Ca21chr2_C_albicans_SC5314164543				#N/A			TRUE
Ca21chr2_C_albicans_SC5314	163146	Ca21chr2_C_albicans_SC5314	164583	Ca21chr2_C_albicans_SC5314163146	Ca21chr2_C_albicans_SC5314164583				Ca21chr2_C_albicans_SC5314163146			FALSE
Ca21chr2_C_albicans_SC5314	163150	Ca21chr2_C_albicans_SC5314	164640	Ca21chr2_C_albicans_SC5314163150	Ca21chr2_C_albicans_SC5314164640				Ca21chr2_C_albicans_SC5314163150			FALSE
Ca21chr2_C_albicans_SC5314	163153	Ca21chr2_C_albicans_SC5314	164646	Ca21chr2_C_albicans_SC5314163153	Ca21chr2_C_albicans_SC5314164646				Ca21chr2_C_albicans_SC5314163153			FALSE
Ca21chr2_C_albicans_SC5314	163430	Ca21chr2_C_albicans_SC5314	164664	Ca21chr2_C_albicans_SC5314163430	Ca21chr2_C_albicans_SC5314164664				Ca21chr2_C_albicans_SC5314163430			FALSE
Ca21chr2_C_albicans_SC5314	164543	Ca21chr2_C_albicans_SC5314	164670	Ca21chr2_C_albicans_SC5314164543	Ca21chr2_C_albicans_SC5314164670				Ca21chr2_C_albicans_SC5314164543			FALSE
Ca21chr2_C_albicans_SC5314	164583	Ca21chr2_C_albicans_SC5314	164676	Ca21chr2_C_albicans_SC5314164583	Ca21chr2_C_albicans_SC5314164676				Ca21chr2_C_albicans_SC5314164583			FALSE
Ca21chr2_C_albicans_SC5314	164640	Ca21chr2_C_albicans_SC5314	164811	Ca21chr2_C_albicans_SC5314164640	Ca21chr2_C_albicans_SC5314164811				Ca21chr2_C_albicans_SC5314164640			FALSE
Ca21chr2_C_albicans_SC5314	164646	Ca21chr2_C_albicans_SC5314	164937	Ca21chr2_C_albicans_SC5314164646	Ca21chr2_C_albicans_SC5314164937				Ca21chr2_C_albicans_SC5314164646			FALSE
Ca21chr2_C_albicans_SC5314	164664	Ca21chr2_C_albicans_SC5314	164952	Ca21chr2_C_albicans_SC5314164664	Ca21chr2_C_albicans_SC5314164952				Ca21chr2_C_albicans_SC5314164664			FALSE
Ca21chr2_C_albicans_SC5314	164670	Ca21chr2_C_albicans_SC5314	164991	Ca21chr2_C_albicans_SC5314164670	Ca21chr2_C_albicans_SC5314164991				Ca21chr2_C_albicans_SC5314164670			FALSE
Ca21chr2_C_albicans_SC5314	164676	Ca21chr2_C_albicans_SC5314	165126	Ca21chr2_C_albicans_SC5314164676	Ca21chr2_C_albicans_SC5314165126				Ca21chr2_C_albicans_SC5314164676			FALSE
Ca21chr2_C_albicans_SC5314	164811	Ca21chr2_C_albicans_SC5314	165138	Ca21chr2_C_albicans_SC5314164811	Ca21chr2_C_albicans_SC5314165138				Ca21chr2_C_albicans_SC5314164811			FALSE
Ca21chr2_C_albicans_SC5314	164937	Ca21chr2_C_albicans_SC5314	165141	Ca21chr2_C_albicans_SC5314164937	Ca21chr2_C_albicans_SC5314165141				Ca21chr2_C_albicans_SC5314164937			FALSE
Ca21chr2_C_albicans_SC5314	164952	Ca21chr2_C_albicans_SC5314	165240	Ca21chr2_C_albicans_SC5314164952	Ca21chr2_C_albicans_SC5314165240				Ca21chr2_C_albicans_SC5314164952			FALSE
Ca21chr2_C_albicans_SC5314	164991	Ca21chr2_C_albicans_SC5314	165252	Ca21chr2_C_albicans_SC5314164991	Ca21chr2_C_albicans_SC5314165252				Ca21chr2_C_albicans_SC5314164991			FALSE
Ca21chr2_C_albicans_SC5314	165126	Ca21chr2_C_albicans_SC5314	165258	Ca21chr2_C_albicans_SC5314165126	Ca21chr2_C_albicans_SC5314165258				Ca21chr2_C_albicans_SC5314165126			FALSE
Ca21chr2_C_albicans_SC5314	165138	Ca21chr2_C_albicans_SC5314	165273	Ca21chr2_C_albicans_SC5314165138	Ca21chr2_C_albicans_SC5314165273				Ca21chr2_C_albicans_SC5314165138			FALSE
Ca21chr2_C_albicans_SC5314	165141	Ca21chr2_C_albicans_SC5314	165297	Ca21chr2_C_albicans_SC5314165141	Ca21chr2_C_albicans_SC5314165297				Ca21chr2_C_albicans_SC5314165141			FALSE
Ca21chr2_C_albicans_SC5314	165240	Ca21chr2_C_albicans_SC5314	165324	Ca21chr2_C_albicans_SC5314165240	Ca21chr2_C_albicans_SC5314165324				Ca21chr2_C_albicans_SC5314165240			FALSE
Ca21chr2_C_albicans_SC5314	165252	Ca21chr2_C_albicans_SC5314	165333	Ca21chr2_C_albicans_SC5314165252	Ca21chr2_C_albicans_SC5314165333				Ca21chr2_C_albicans_SC5314165252			FALSE
Ca21chr2_C_albicans_SC5314	165258	Ca21chr2_C_albicans_SC5314	165381	Ca21chr2_C_albicans_SC5314165258	Ca21chr2_C_albicans_SC5314165381				Ca21chr2_C_albicans_SC5314165258			FALSE
Ca21chr2_C_albicans_SC5314	165273	Ca21chr2_C_albicans_SC5314	165385	Ca21chr2_C_albicans_SC5314165273	Ca21chr2_C_albicans_SC5314165385				Ca21chr2_C_albicans_SC5314165273			FALSE
Ca21chr2_C_albicans_SC5314	165297	Ca21chr2_C_albicans_SC5314	165420	Ca21chr2_C_albicans_SC5314165297	Ca21chr2_C_albicans_SC5314165420				Ca21chr2_C_albicans_SC5314165297			FALSE
Ca21chr2_C_albicans_SC5314	165324	Ca21chr2_C_albicans_SC5314	165456	Ca21chr2_C_albicans_SC5314165324	Ca21chr2_C_albicans_SC5314165456				Ca21chr2_C_albicans_SC5314165324			FALSE
Ca21chr2_C_albicans_SC5314	165333	Ca21chr2_C_albicans_SC5314	165486	Ca21chr2_C_albicans_SC5314165333	Ca21chr2_C_albicans_SC5314165486				Ca21chr2_C_albicans_SC5314165333			FALSE
Ca21chr2_C_albicans_SC5314	165381	Ca21chr2_C_albicans_SC5314	165490	Ca21chr2_C_albicans_SC5314165381	Ca21chr2_C_albicans_SC5314165490				Ca21chr2_C_albicans_SC5314165381			FALSE
Ca21chr2_C_albicans_SC5314	165385	Ca21chr2_C_albicans_SC5314	165525	Ca21chr2_C_albicans_SC5314165385	Ca21chr2_C_albicans_SC5314165525				Ca21chr2_C_albicans_SC5314165385			FALSE
Ca21chr2_C_albicans_SC5314	165420	Ca21chr2_C_albicans_SC5314	165543	Ca21chr2_C_albicans_SC5314165420	Ca21chr2_C_albicans_SC5314165543				Ca21chr2_C_albicans_SC5314165420			FALSE
Ca21chr2_C_albicans_SC5314	165456	Ca21chr2_C_albicans_SC5314	165546	Ca21chr2_C_albicans_SC5314165456	Ca21chr2_C_albicans_SC5314165546				Ca21chr2_C_albicans_SC5314165456			FALSE
Ca21chr2_C_albicans_SC5314	165486	Ca21chr2_C_albicans_SC5314	165603	Ca21chr2_C_albicans_SC5314165486	Ca21chr2_C_albicans_SC5314165603				Ca21chr2_C_albicans_SC5314165486			FALSE
Ca21chr2_C_albicans_SC5314	165490	Ca21chr2_C_albicans_SC5314	165604	Ca21chr2_C_albicans_SC5314165490	Ca21chr2_C_albicans_SC5314165604				Ca21chr2_C_albicans_SC5314165490			FALSE
Ca21chr2_C_albicans_SC5314	165525	Ca21chr2_C_albicans_SC5314	165876	Ca21chr2_C_albicans_SC5314165525	Ca21chr2_C_albicans_SC5314165876				Ca21chr2_C_albicans_SC5314165525			FALSE
Ca21chr2_C_albicans_SC5314	165543	Ca21chr2_C_albicans_SC5314	168748	Ca21chr2_C_albicans_SC5314165543	Ca21chr2_C_albicans_SC5314168748				Ca21chr2_C_albicans_SC5314165543			FALSE
Ca21chr2_C_albicans_SC5314	165546	Ca21chr2_C_albicans_SC5314	168766	Ca21chr2_C_albicans_SC5314165546	Ca21chr2_C_albicans_SC5314168766				Ca21chr2_C_albicans_SC5314165546			FALSE
Ca21chr2_C_albicans_SC5314	165603	Ca21chr2_C_albicans_SC5314	168769	Ca21chr2_C_albicans_SC5314165603	Ca21chr2_C_albicans_SC5314168769				Ca21chr2_C_albicans_SC5314165603			FALSE
Ca21chr2_C_albicans_SC5314	165604	Ca21chr2_C_albicans_SC5314	168835	Ca21chr2_C_albicans_SC5314165604	Ca21chr2_C_albicans_SC5314168835				Ca21chr2_C_albicans_SC5314165604			FALSE
Ca21chr2_C_albicans_SC5314	165876	Ca21chr2_C_albicans_SC5314	168910	Ca21chr2_C_albicans_SC5314165876	Ca21chr2_C_albicans_SC5314168910				Ca21chr2_C_albicans_SC5314165876			FALSE
Ca21chr2_C_albicans_SC5314	168748	Ca21chr2_C_albicans_SC5314	170408	Ca21chr2_C_albicans_SC5314168748	Ca21chr2_C_albicans_SC5314170408				Ca21chr2_C_albicans_SC5314168748			FALSE
Ca21chr2_C_albicans_SC5314	168766	Ca21chr2_C_albicans_SC5314	170573	Ca21chr2_C_albicans_SC5314168766	Ca21chr2_C_albicans_SC5314170573				Ca21chr2_C_albicans_SC5314168766			FALSE
Ca21chr2_C_albicans_SC5314	168769	Ca21chr2_C_albicans_SC5314	170591	Ca21chr2_C_albicans_SC5314168769	Ca21chr2_C_albicans_SC5314170591				Ca21chr2_C_albicans_SC5314168769			FALSE
Ca21chr2_C_albicans_SC5314	168835	Ca21chr2_C_albicans_SC5314	171335	Ca21chr2_C_albicans_SC5314168835	Ca21chr2_C_albicans_SC5314171335				Ca21chr2_C_albicans_SC5314168835			FALSE
Ca21chr2_C_albicans_SC5314	168910	Ca21chr2_C_albicans_SC5314	172366	Ca21chr2_C_albicans_SC5314168910	Ca21chr2_C_albicans_SC5314172366				Ca21chr2_C_albicans_SC5314168910			FALSE
Ca21chr2_C_albicans_SC5314	170408	Ca21chr2_C_albicans_SC5314	172797	Ca21chr2_C_albicans_SC5314170408	Ca21chr2_C_albicans_SC5314172797				Ca21chr2_C_albicans_SC5314170408			FALSE
Ca21chr2_C_albicans_SC5314	170573	Ca21chr2_C_albicans_SC5314	172813	Ca21chr2_C_albicans_SC5314170573	Ca21chr2_C_albicans_SC5314172813				Ca21chr2_C_albicans_SC5314170573			FALSE
Ca21chr2_C_albicans_SC5314	170591	Ca21chr2_C_albicans_SC5314	172851	Ca21chr2_C_albicans_SC5314170591	Ca21chr2_C_albicans_SC5314172851				Ca21chr2_C_albicans_SC5314170591			FALSE
Ca21chr2_C_albicans_SC5314	171335	Ca21chr2_C_albicans_SC5314	172955	Ca21chr2_C_albicans_SC5314171335	Ca21chr2_C_albicans_SC5314172955				Ca21chr2_C_albicans_SC5314171335			FALSE
Ca21chr2_C_albicans_SC5314	172366	Ca21chr2_C_albicans_SC5314	173193	Ca21chr2_C_albicans_SC5314172366	Ca21chr2_C_albicans_SC5314173193				Ca21chr2_C_albicans_SC5314172366			FALSE
Ca21chr2_C_albicans_SC5314	172797	Ca21chr2_C_albicans_SC5314	173376	Ca21chr2_C_albicans_SC5314172797	Ca21chr2_C_albicans_SC5314173376				Ca21chr2_C_albicans_SC5314172797			FALSE
Ca21chr2_C_albicans_SC5314	172813	Ca21chr2_C_albicans_SC5314	173497	Ca21chr2_C_albicans_SC5314172813	Ca21chr2_C_albicans_SC5314173497				Ca21chr2_C_albicans_SC5314172813			FALSE
Ca21chr2_C_albicans_SC5314	172851	Ca21chr2_C_albicans_SC5314	173900	Ca21chr2_C_albicans_SC5314172851	Ca21chr2_C_albicans_SC5314173900				Ca21chr2_C_albicans_SC5314172851			FALSE
Ca21chr2_C_albicans_SC5314	172955	Ca21chr2_C_albicans_SC5314	174075	Ca21chr2_C_albicans_SC5314172955	Ca21chr2_C_albicans_SC5314174075				Ca21chr2_C_albicans_SC5314172955			FALSE
Ca21chr2_C_albicans_SC5314	173193	Ca21chr2_C_albicans_SC5314	174141	Ca21chr2_C_albicans_SC5314173193	Ca21chr2_C_albicans_SC5314174141				Ca21chr2_C_albicans_SC5314173193			FALSE
Ca21chr2_C_albicans_SC5314	173376	Ca21chr2_C_albicans_SC5314	174386	Ca21chr2_C_albicans_SC5314173376	Ca21chr2_C_albicans_SC5314174386				Ca21chr2_C_albicans_SC5314173376			FALSE
Ca21chr2_C_albicans_SC5314	173497	Ca21chr2_C_albicans_SC5314	176649	Ca21chr2_C_albicans_SC5314173497	Ca21chr2_C_albicans_SC5314176649				Ca21chr2_C_albicans_SC5314173497			FALSE
Ca21chr2_C_albicans_SC5314	173900	Ca21chr2_C_albicans_SC5314	178424	Ca21chr2_C_albicans_SC5314173900	Ca21chr2_C_albicans_SC5314178424				Ca21chr2_C_albicans_SC5314173900			FALSE
Ca21chr2_C_albicans_SC5314	174075	Ca21chr2_C_albicans_SC5314	178655	Ca21chr2_C_albicans_SC5314174075	Ca21chr2_C_albicans_SC5314178655				Ca21chr2_C_albicans_SC5314174075			FALSE
Ca21chr2_C_albicans_SC5314	174141	Ca21chr2_C_albicans_SC5314	178703	Ca21chr2_C_albicans_SC5314174141	Ca21chr2_C_albicans_SC5314178703				Ca21chr2_C_albicans_SC5314174141			FALSE
Ca21chr2_C_albicans_SC5314	174386	Ca21chr2_C_albicans_SC5314	179228	Ca21chr2_C_albicans_SC5314174386	Ca21chr2_C_albicans_SC5314179228				Ca21chr2_C_albicans_SC5314174386			FALSE
Ca21chr2_C_albicans_SC5314	176649	Ca21chr2_C_albicans_SC5314	179246	Ca21chr2_C_albicans_SC5314176649	Ca21chr2_C_albicans_SC5314179246				Ca21chr2_C_albicans_SC5314176649			FALSE
Ca21chr2_C_albicans_SC5314	178424	Ca21chr2_C_albicans_SC5314	179594	Ca21chr2_C_albicans_SC5314178424	Ca21chr2_C_albicans_SC5314179594				Ca21chr2_C_albicans_SC5314178424			FALSE
Ca21chr2_C_albicans_SC5314	178655	Ca21chr2_C_albicans_SC5314	179627	Ca21chr2_C_albicans_SC5314178655	Ca21chr2_C_albicans_SC5314179627				Ca21chr2_C_albicans_SC5314178655			FALSE
Ca21chr2_C_albicans_SC5314	178703	Ca21chr2_C_albicans_SC5314	179675	Ca21chr2_C_albicans_SC5314178703	Ca21chr2_C_albicans_SC5314179675				Ca21chr2_C_albicans_SC5314178703			FALSE
Ca21chr2_C_albicans_SC5314	179228	Ca21chr2_C_albicans_SC5314	180810	Ca21chr2_C_albicans_SC5314179228	Ca21chr2_C_albicans_SC5314180810				Ca21chr2_C_albicans_SC5314179228			FALSE
Ca21chr2_C_albicans_SC5314	179246	Ca21chr2_C_albicans_SC5314	181090	Ca21chr2_C_albicans_SC5314179246	Ca21chr2_C_albicans_SC5314181090				Ca21chr2_C_albicans_SC5314179246			FALSE
Ca21chr2_C_albicans_SC5314	179594	Ca21chr2_C_albicans_SC5314	181852	Ca21chr2_C_albicans_SC5314179594	Ca21chr2_C_albicans_SC5314181852				Ca21chr2_C_albicans_SC5314179594			FALSE
Ca21chr2_C_albicans_SC5314	179627	Ca21chr2_C_albicans_SC5314	181921	Ca21chr2_C_albicans_SC5314179627	Ca21chr2_C_albicans_SC5314181921				Ca21chr2_C_albicans_SC5314179627			FALSE
Ca21chr2_C_albicans_SC5314	179675	Ca21chr2_C_albicans_SC5314	182296	Ca21chr2_C_albicans_SC5314179675	Ca21chr2_C_albicans_SC5314182296				Ca21chr2_C_albicans_SC5314179675			FALSE
Ca21chr2_C_albicans_SC5314	180810	Ca21chr2_C_albicans_SC5314	184352	Ca21chr2_C_albicans_SC5314180810	Ca21chr2_C_albicans_SC5314184352				Ca21chr2_C_albicans_SC5314180810			FALSE
Ca21chr2_C_albicans_SC5314	181090	Ca21chr2_C_albicans_SC5314	186827	Ca21chr2_C_albicans_SC5314181090	Ca21chr2_C_albicans_SC5314186827				Ca21chr2_C_albicans_SC5314181090			FALSE
Ca21chr2_C_albicans_SC5314	181852	Ca21chr2_C_albicans_SC5314	187430	Ca21chr2_C_albicans_SC5314181852	Ca21chr2_C_albicans_SC5314187430				Ca21chr2_C_albicans_SC5314181852			FALSE
Ca21chr2_C_albicans_SC5314	181921	Ca21chr2_C_albicans_SC5314	188710	Ca21chr2_C_albicans_SC5314181921	Ca21chr2_C_albicans_SC5314188710				Ca21chr2_C_albicans_SC5314181921			FALSE
Ca21chr2_C_albicans_SC5314	182296	Ca21chr2_C_albicans_SC5314	188713	Ca21chr2_C_albicans_SC5314182296	Ca21chr2_C_albicans_SC5314188713				Ca21chr2_C_albicans_SC5314182296			FALSE
Ca21chr2_C_albicans_SC5314	184352	Ca21chr2_C_albicans_SC5314	188727	Ca21chr2_C_albicans_SC5314184352	Ca21chr2_C_albicans_SC5314188727				Ca21chr2_C_albicans_SC5314184352			FALSE
Ca21chr2_C_albicans_SC5314	186827	Ca21chr2_C_albicans_SC5314	188875	Ca21chr2_C_albicans_SC5314186827	Ca21chr2_C_albicans_SC5314188875				Ca21chr2_C_albicans_SC5314186827			FALSE
Ca21chr2_C_albicans_SC5314	187430	Ca21chr2_C_albicans_SC5314	189001	Ca21chr2_C_albicans_SC5314187430	Ca21chr2_C_albicans_SC5314189001				Ca21chr2_C_albicans_SC5314187430			FALSE
Ca21chr2_C_albicans_SC5314	188710	Ca21chr2_C_albicans_SC5314	190598	Ca21chr2_C_albicans_SC5314188710	Ca21chr2_C_albicans_SC5314190598				Ca21chr2_C_albicans_SC5314188710			FALSE
Ca21chr2_C_albicans_SC5314	188713	Ca21chr2_C_albicans_SC5314	190730	Ca21chr2_C_albicans_SC5314188713	Ca21chr2_C_albicans_SC5314190730				Ca21chr2_C_albicans_SC5314188713			FALSE
Ca21chr2_C_albicans_SC5314	188727	Ca21chr2_C_albicans_SC5314	190736	Ca21chr2_C_albicans_SC5314188727	Ca21chr2_C_albicans_SC5314190736				Ca21chr2_C_albicans_SC5314188727			FALSE
Ca21chr2_C_albicans_SC5314	188875	Ca21chr2_C_albicans_SC5314	190742	Ca21chr2_C_albicans_SC5314188875	Ca21chr2_C_albicans_SC5314190742				Ca21chr2_C_albicans_SC5314188875			FALSE
Ca21chr2_C_albicans_SC5314	189001	Ca21chr2_C_albicans_SC5314	190874	Ca21chr2_C_albicans_SC5314189001	Ca21chr2_C_albicans_SC5314190874				Ca21chr2_C_albicans_SC5314189001			FALSE
Ca21chr2_C_albicans_SC5314	190598	Ca21chr2_C_albicans_SC5314	190913	Ca21chr2_C_albicans_SC5314190598	Ca21chr2_C_albicans_SC5314190913				Ca21chr2_C_albicans_SC5314190598			FALSE
Ca21chr2_C_albicans_SC5314	190730	Ca21chr2_C_albicans_SC5314	190921	Ca21chr2_C_albicans_SC5314190730	Ca21chr2_C_albicans_SC5314190921				Ca21chr2_C_albicans_SC5314190730			FALSE
Ca21chr2_C_albicans_SC5314	190736	Ca21chr2_C_albicans_SC5314	191114	Ca21chr2_C_albicans_SC5314190736	Ca21chr2_C_albicans_SC5314191114				Ca21chr2_C_albicans_SC5314190736			FALSE
Ca21chr2_C_albicans_SC5314	190742	Ca21chr2_C_albicans_SC5314	191195	Ca21chr2_C_albicans_SC5314190742	Ca21chr2_C_albicans_SC5314191195				Ca21chr2_C_albicans_SC5314190742			FALSE
Ca21chr2_C_albicans_SC5314	190874	Ca21chr2_C_albicans_SC5314	191201	Ca21chr2_C_albicans_SC5314190874	Ca21chr2_C_albicans_SC5314191201				Ca21chr2_C_albicans_SC5314190874			FALSE
Ca21chr2_C_albicans_SC5314	190913	Ca21chr2_C_albicans_SC5314	191627	Ca21chr2_C_albicans_SC5314190913	Ca21chr2_C_albicans_SC5314191627				Ca21chr2_C_albicans_SC5314190913			FALSE
Ca21chr2_C_albicans_SC5314	190921	Ca21chr2_C_albicans_SC5314	192584	Ca21chr2_C_albicans_SC5314190921	Ca21chr2_C_albicans_SC5314192584				Ca21chr2_C_albicans_SC5314190921			FALSE
Ca21chr2_C_albicans_SC5314	191114	Ca21chr2_C_albicans_SC5314	193386	Ca21chr2_C_albicans_SC5314191114	Ca21chr2_C_albicans_SC5314193386				Ca21chr2_C_albicans_SC5314191114			FALSE
Ca21chr2_C_albicans_SC5314	191195	Ca21chr2_C_albicans_SC5314	193746	Ca21chr2_C_albicans_SC5314191195	Ca21chr2_C_albicans_SC5314193746				Ca21chr2_C_albicans_SC5314191195			FALSE
Ca21chr2_C_albicans_SC5314	191201	Ca21chr2_C_albicans_SC5314	194217	Ca21chr2_C_albicans_SC5314191201	Ca21chr2_C_albicans_SC5314194217				Ca21chr2_C_albicans_SC5314191201			FALSE
Ca21chr2_C_albicans_SC5314	191627	Ca21chr2_C_albicans_SC5314	196094	Ca21chr2_C_albicans_SC5314191627	Ca21chr2_C_albicans_SC5314196094				Ca21chr2_C_albicans_SC5314191627			FALSE
Ca21chr2_C_albicans_SC5314	192584	Ca21chr2_C_albicans_SC5314	196296	Ca21chr2_C_albicans_SC5314192584	Ca21chr2_C_albicans_SC5314196296				Ca21chr2_C_albicans_SC5314192584			FALSE
Ca21chr2_C_albicans_SC5314	193386	Ca21chr2_C_albicans_SC5314	196298	Ca21chr2_C_albicans_SC5314193386	Ca21chr2_C_albicans_SC5314196298				Ca21chr2_C_albicans_SC5314193386			FALSE
Ca21chr2_C_albicans_SC5314	193746	Ca21chr2_C_albicans_SC5314	196315	Ca21chr2_C_albicans_SC5314193746	Ca21chr2_C_albicans_SC5314196315				Ca21chr2_C_albicans_SC5314193746			FALSE
Ca21chr2_C_albicans_SC5314	194217	Ca21chr2_C_albicans_SC5314	196341	Ca21chr2_C_albicans_SC5314194217	Ca21chr2_C_albicans_SC5314196341				Ca21chr2_C_albicans_SC5314194217			FALSE
Ca21chr2_C_albicans_SC5314	196094	Ca21chr2_C_albicans_SC5314	197119	Ca21chr2_C_albicans_SC5314196094	Ca21chr2_C_albicans_SC5314197119				Ca21chr2_C_albicans_SC5314196094			FALSE
Ca21chr2_C_albicans_SC5314	196296	Ca21chr2_C_albicans_SC5314	197744	Ca21chr2_C_albicans_SC5314196296	Ca21chr2_C_albicans_SC5314197744				Ca21chr2_C_albicans_SC5314196296			FALSE
Ca21chr2_C_albicans_SC5314	196298	Ca21chr2_C_albicans_SC5314	198173	Ca21chr2_C_albicans_SC5314196298	Ca21chr2_C_albicans_SC5314198173				Ca21chr2_C_albicans_SC5314196298			FALSE
Ca21chr2_C_albicans_SC5314	196315	Ca21chr2_C_albicans_SC5314	198199	Ca21chr2_C_albicans_SC5314196315	Ca21chr2_C_albicans_SC5314198199				Ca21chr2_C_albicans_SC5314196315			FALSE
Ca21chr2_C_albicans_SC5314	196341	Ca21chr2_C_albicans_SC5314	201916	Ca21chr2_C_albicans_SC5314196341	Ca21chr2_C_albicans_SC5314201916				Ca21chr2_C_albicans_SC5314196341			FALSE
Ca21chr2_C_albicans_SC5314	197119	Ca21chr2_C_albicans_SC5314	202678	Ca21chr2_C_albicans_SC5314197119	Ca21chr2_C_albicans_SC5314202678				Ca21chr2_C_albicans_SC5314197119			FALSE
Ca21chr2_C_albicans_SC5314	197744	Ca21chr2_C_albicans_SC5314	202693	Ca21chr2_C_albicans_SC5314197744	Ca21chr2_C_albicans_SC5314202693				Ca21chr2_C_albicans_SC5314197744			FALSE
Ca21chr2_C_albicans_SC5314	198173	Ca21chr2_C_albicans_SC5314	202999	Ca21chr2_C_albicans_SC5314198173	Ca21chr2_C_albicans_SC5314202999				Ca21chr2_C_albicans_SC5314198173			FALSE
Ca21chr2_C_albicans_SC5314	198199	Ca21chr2_C_albicans_SC5314	203085	Ca21chr2_C_albicans_SC5314198199	Ca21chr2_C_albicans_SC5314203085				Ca21chr2_C_albicans_SC5314198199			FALSE
Ca21chr2_C_albicans_SC5314	201916	Ca21chr2_C_albicans_SC5314	205033	Ca21chr2_C_albicans_SC5314201916	Ca21chr2_C_albicans_SC5314205033				Ca21chr2_C_albicans_SC5314201916			FALSE
Ca21chr2_C_albicans_SC5314	202678	Ca21chr2_C_albicans_SC5314	205077	Ca21chr2_C_albicans_SC5314202678	Ca21chr2_C_albicans_SC5314205077				Ca21chr2_C_albicans_SC5314202678			FALSE
Ca21chr2_C_albicans_SC5314	202693	Ca21chr2_C_albicans_SC5314	205198	Ca21chr2_C_albicans_SC5314202693	Ca21chr2_C_albicans_SC5314205198				Ca21chr2_C_albicans_SC5314202693			FALSE
Ca21chr2_C_albicans_SC5314	202999	Ca21chr2_C_albicans_SC5314	205372	Ca21chr2_C_albicans_SC5314202999	Ca21chr2_C_albicans_SC5314205372				Ca21chr2_C_albicans_SC5314202999			FALSE
Ca21chr2_C_albicans_SC5314	203085	Ca21chr2_C_albicans_SC5314	205768	Ca21chr2_C_albicans_SC5314203085	Ca21chr2_C_albicans_SC5314205768				Ca21chr2_C_albicans_SC5314203085			FALSE
Ca21chr2_C_albicans_SC5314	205033	Ca21chr2_C_albicans_SC5314	206902	Ca21chr2_C_albicans_SC5314205033	Ca21chr2_C_albicans_SC5314206902				Ca21chr2_C_albicans_SC5314205033			FALSE
Ca21chr2_C_albicans_SC5314	205077	Ca21chr2_C_albicans_SC5314	207013	Ca21chr2_C_albicans_SC5314205077	Ca21chr2_C_albicans_SC5314207013				Ca21chr2_C_albicans_SC5314205077			FALSE
Ca21chr2_C_albicans_SC5314	205198	Ca21chr2_C_albicans_SC5314	207031	Ca21chr2_C_albicans_SC5314205198	Ca21chr2_C_albicans_SC5314207031				Ca21chr2_C_albicans_SC5314205198			FALSE
Ca21chr2_C_albicans_SC5314	205372	Ca21chr2_C_albicans_SC5314	207037	Ca21chr2_C_albicans_SC5314205372	Ca21chr2_C_albicans_SC5314207037				Ca21chr2_C_albicans_SC5314205372			FALSE
Ca21chr2_C_albicans_SC5314	205768	Ca21chr2_C_albicans_SC5314	207229	Ca21chr2_C_albicans_SC5314205768	Ca21chr2_C_albicans_SC5314207229				Ca21chr2_C_albicans_SC5314205768			FALSE
Ca21chr2_C_albicans_SC5314	206902	Ca21chr2_C_albicans_SC5314	208572	Ca21chr2_C_albicans_SC5314206902	Ca21chr2_C_albicans_SC5314208572				Ca21chr2_C_albicans_SC5314206902			FALSE
Ca21chr2_C_albicans_SC5314	207013	Ca21chr2_C_albicans_SC5314	208578	Ca21chr2_C_albicans_SC5314207013	Ca21chr2_C_albicans_SC5314208578				Ca21chr2_C_albicans_SC5314207013			FALSE
Ca21chr2_C_albicans_SC5314	207031	Ca21chr2_C_albicans_SC5314	208645	Ca21chr2_C_albicans_SC5314207031	Ca21chr2_C_albicans_SC5314208645				Ca21chr2_C_albicans_SC5314207031			FALSE
Ca21chr2_C_albicans_SC5314	207037	Ca21chr2_C_albicans_SC5314	212571	Ca21chr2_C_albicans_SC5314207037	Ca21chr2_C_albicans_SC5314212571				Ca21chr2_C_albicans_SC5314207037			FALSE
Ca21chr2_C_albicans_SC5314	207229	Ca21chr2_C_albicans_SC5314	212575	Ca21chr2_C_albicans_SC5314207229	Ca21chr2_C_albicans_SC5314212575				Ca21chr2_C_albicans_SC5314207229			FALSE
Ca21chr2_C_albicans_SC5314	208572	Ca21chr2_C_albicans_SC5314	212701	Ca21chr2_C_albicans_SC5314208572	Ca21chr2_C_albicans_SC5314212701				Ca21chr2_C_albicans_SC5314208572			FALSE
Ca21chr2_C_albicans_SC5314	208578	Ca21chr2_C_albicans_SC5314	212720	Ca21chr2_C_albicans_SC5314208578	Ca21chr2_C_albicans_SC5314212720				Ca21chr2_C_albicans_SC5314208578			FALSE
Ca21chr2_C_albicans_SC5314	208645	Ca21chr2_C_albicans_SC5314	216091	Ca21chr2_C_albicans_SC5314208645	Ca21chr2_C_albicans_SC5314216091				Ca21chr2_C_albicans_SC5314208645			FALSE
Ca21chr2_C_albicans_SC5314	212571	Ca21chr2_C_albicans_SC5314	216515	Ca21chr2_C_albicans_SC5314212571	Ca21chr2_C_albicans_SC5314216515				Ca21chr2_C_albicans_SC5314212571			FALSE
Ca21chr2_C_albicans_SC5314	212575	Ca21chr2_C_albicans_SC5314	221414	Ca21chr2_C_albicans_SC5314212575	Ca21chr2_C_albicans_SC5314221414				Ca21chr2_C_albicans_SC5314212575			FALSE
Ca21chr2_C_albicans_SC5314	212701	Ca21chr2_C_albicans_SC5314	223717	Ca21chr2_C_albicans_SC5314212701	Ca21chr2_C_albicans_SC5314223717				Ca21chr2_C_albicans_SC5314212701			FALSE
Ca21chr2_C_albicans_SC5314	212720	Ca21chr2_C_albicans_SC5314	223742	Ca21chr2_C_albicans_SC5314212720	Ca21chr2_C_albicans_SC5314223742				Ca21chr2_C_albicans_SC5314212720			FALSE
Ca21chr2_C_albicans_SC5314	216091	Ca21chr2_C_albicans_SC5314	224135	Ca21chr2_C_albicans_SC5314216091	Ca21chr2_C_albicans_SC5314224135				Ca21chr2_C_albicans_SC5314216091			FALSE
Ca21chr2_C_albicans_SC5314	216515	Ca21chr2_C_albicans_SC5314	224228	Ca21chr2_C_albicans_SC5314216515	Ca21chr2_C_albicans_SC5314224228				Ca21chr2_C_albicans_SC5314216515			FALSE
Ca21chr2_C_albicans_SC5314	221414	Ca21chr2_C_albicans_SC5314	225018	Ca21chr2_C_albicans_SC5314221414	Ca21chr2_C_albicans_SC5314225018				Ca21chr2_C_albicans_SC5314221414			FALSE
Ca21chr2_C_albicans_SC5314	223717	Ca21chr2_C_albicans_SC5314	225177	Ca21chr2_C_albicans_SC5314223717	Ca21chr2_C_albicans_SC5314225177				Ca21chr2_C_albicans_SC5314223717			FALSE
Ca21chr2_C_albicans_SC5314	223742	Ca21chr2_C_albicans_SC5314	225209	Ca21chr2_C_albicans_SC5314223742	Ca21chr2_C_albicans_SC5314225209				Ca21chr2_C_albicans_SC5314223742			FALSE
Ca21chr2_C_albicans_SC5314	224135	Ca21chr2_C_albicans_SC5314	233255	Ca21chr2_C_albicans_SC5314224135	Ca21chr2_C_albicans_SC5314233255				Ca21chr2_C_albicans_SC5314224135			FALSE
Ca21chr2_C_albicans_SC5314	224228	Ca21chr2_C_albicans_SC5314	233423	Ca21chr2_C_albicans_SC5314224228	Ca21chr2_C_albicans_SC5314233423				Ca21chr2_C_albicans_SC5314224228			FALSE
Ca21chr2_C_albicans_SC5314	225018	Ca21chr2_C_albicans_SC5314	242245	Ca21chr2_C_albicans_SC5314225018	Ca21chr2_C_albicans_SC5314242245				Ca21chr2_C_albicans_SC5314225018			FALSE
Ca21chr2_C_albicans_SC5314	225177	Ca21chr2_C_albicans_SC5314	242284	Ca21chr2_C_albicans_SC5314225177	Ca21chr2_C_albicans_SC5314242284				Ca21chr2_C_albicans_SC5314225177			FALSE
Ca21chr2_C_albicans_SC5314	225209	Ca21chr2_C_albicans_SC5314	243074	Ca21chr2_C_albicans_SC5314225209	Ca21chr2_C_albicans_SC5314243074				Ca21chr2_C_albicans_SC5314225209			FALSE
Ca21chr2_C_albicans_SC5314	233255	Ca21chr2_C_albicans_SC5314	244924	Ca21chr2_C_albicans_SC5314233255	Ca21chr2_C_albicans_SC5314244924				Ca21chr2_C_albicans_SC5314233255			FALSE
Ca21chr2_C_albicans_SC5314	233423	Ca21chr2_C_albicans_SC5314	247598	Ca21chr2_C_albicans_SC5314233423	Ca21chr2_C_albicans_SC5314247598				Ca21chr2_C_albicans_SC5314233423			FALSE
Ca21chr2_C_albicans_SC5314	242245	Ca21chr2_C_albicans_SC5314	255901	Ca21chr2_C_albicans_SC5314242245	Ca21chr2_C_albicans_SC5314255901				Ca21chr2_C_albicans_SC5314242245			FALSE
Ca21chr2_C_albicans_SC5314	242284	Ca21chr2_C_albicans_SC5314	264704	Ca21chr2_C_albicans_SC5314242284	Ca21chr2_C_albicans_SC5314264704				Ca21chr2_C_albicans_SC5314242284			FALSE
Ca21chr2_C_albicans_SC5314	243074	Ca21chr2_C_albicans_SC5314	283460	Ca21chr2_C_albicans_SC5314243074	Ca21chr2_C_albicans_SC5314283460				Ca21chr2_C_albicans_SC5314243074			FALSE
Ca21chr2_C_albicans_SC5314	244924	Ca21chr2_C_albicans_SC5314	283563	Ca21chr2_C_albicans_SC5314244924	Ca21chr2_C_albicans_SC5314283563				Ca21chr2_C_albicans_SC5314244924			FALSE
Ca21chr2_C_albicans_SC5314	247598	Ca21chr2_C_albicans_SC5314	284579	Ca21chr2_C_albicans_SC5314247598	Ca21chr2_C_albicans_SC5314284579				Ca21chr2_C_albicans_SC5314247598			FALSE
Ca21chr2_C_albicans_SC5314	255901	Ca21chr2_C_albicans_SC5314	302005	Ca21chr2_C_albicans_SC5314255901	Ca21chr2_C_albicans_SC5314302005				Ca21chr2_C_albicans_SC5314255901			FALSE
Ca21chr2_C_albicans_SC5314	264704	Ca21chr2_C_albicans_SC5314	302908	Ca21chr2_C_albicans_SC5314264704	Ca21chr2_C_albicans_SC5314302908				Ca21chr2_C_albicans_SC5314264704			FALSE
Ca21chr2_C_albicans_SC5314	283460	Ca21chr2_C_albicans_SC5314	303599	Ca21chr2_C_albicans_SC5314283460	Ca21chr2_C_albicans_SC5314303599				Ca21chr2_C_albicans_SC5314283460			FALSE
Ca21chr2_C_albicans_SC5314	284579	Ca21chr2_C_albicans_SC5314	303602	Ca21chr2_C_albicans_SC5314284579	Ca21chr2_C_albicans_SC5314303602				Ca21chr2_C_albicans_SC5314284579			FALSE
Ca21chr2_C_albicans_SC5314	302005	Ca21chr2_C_albicans_SC5314	303608	Ca21chr2_C_albicans_SC5314302005	Ca21chr2_C_albicans_SC5314303608				Ca21chr2_C_albicans_SC5314302005			FALSE
Ca21chr2_C_albicans_SC5314	302908	Ca21chr2_C_albicans_SC5314	303925	Ca21chr2_C_albicans_SC5314302908	Ca21chr2_C_albicans_SC5314303925				Ca21chr2_C_albicans_SC5314302908			FALSE
Ca21chr2_C_albicans_SC5314	303599	Ca21chr2_C_albicans_SC5314	303947	Ca21chr2_C_albicans_SC5314303599	Ca21chr2_C_albicans_SC5314303947				Ca21chr2_C_albicans_SC5314303599			FALSE
Ca21chr2_C_albicans_SC5314	303602	Ca21chr2_C_albicans_SC5314	303968	Ca21chr2_C_albicans_SC5314303602	Ca21chr2_C_albicans_SC5314303968				Ca21chr2_C_albicans_SC5314303602			FALSE
Ca21chr2_C_albicans_SC5314	303608	Ca21chr2_C_albicans_SC5314	304214	Ca21chr2_C_albicans_SC5314303608	Ca21chr2_C_albicans_SC5314304214				Ca21chr2_C_albicans_SC5314303608			FALSE
Ca21chr2_C_albicans_SC5314	303925	Ca21chr2_C_albicans_SC5314	307880	Ca21chr2_C_albicans_SC5314303925	Ca21chr2_C_albicans_SC5314307880				Ca21chr2_C_albicans_SC5314303925			FALSE
Ca21chr2_C_albicans_SC5314	303947	Ca21chr2_C_albicans_SC5314	308209	Ca21chr2_C_albicans_SC5314303947	Ca21chr2_C_albicans_SC5314308209				Ca21chr2_C_albicans_SC5314303947			FALSE
Ca21chr2_C_albicans_SC5314	303968	Ca21chr2_C_albicans_SC5314	308230	Ca21chr2_C_albicans_SC5314303968	Ca21chr2_C_albicans_SC5314308230				Ca21chr2_C_albicans_SC5314303968			FALSE
Ca21chr2_C_albicans_SC5314	304214	Ca21chr2_C_albicans_SC5314	308541	Ca21chr2_C_albicans_SC5314304214	Ca21chr2_C_albicans_SC5314308541				Ca21chr2_C_albicans_SC5314304214			FALSE
Ca21chr2_C_albicans_SC5314	307880	Ca21chr2_C_albicans_SC5314	322659	Ca21chr2_C_albicans_SC5314307880	Ca21chr2_C_albicans_SC5314322659				Ca21chr2_C_albicans_SC5314307880			FALSE
Ca21chr2_C_albicans_SC5314	308209	Ca21chr2_C_albicans_SC5314	322700	Ca21chr2_C_albicans_SC5314308209	Ca21chr2_C_albicans_SC5314322700				Ca21chr2_C_albicans_SC5314308209			FALSE
Ca21chr2_C_albicans_SC5314	308230	Ca21chr2_C_albicans_SC5314	323007	Ca21chr2_C_albicans_SC5314308230	Ca21chr2_C_albicans_SC5314323007				Ca21chr2_C_albicans_SC5314308230			FALSE
Ca21chr2_C_albicans_SC5314	308541	Ca21chr2_C_albicans_SC5314	323013	Ca21chr2_C_albicans_SC5314308541	Ca21chr2_C_albicans_SC5314323013				Ca21chr2_C_albicans_SC5314308541			FALSE
Ca21chr2_C_albicans_SC5314	322659	Ca21chr2_C_albicans_SC5314	331811	Ca21chr2_C_albicans_SC5314322659	Ca21chr2_C_albicans_SC5314331811				Ca21chr2_C_albicans_SC5314322659			FALSE
Ca21chr2_C_albicans_SC5314	322700	Ca21chr2_C_albicans_SC5314	334542	Ca21chr2_C_albicans_SC5314322700	Ca21chr2_C_albicans_SC5314334542				Ca21chr2_C_albicans_SC5314322700			FALSE
Ca21chr2_C_albicans_SC5314	323007	Ca21chr2_C_albicans_SC5314	334625	Ca21chr2_C_albicans_SC5314323007	Ca21chr2_C_albicans_SC5314334625				Ca21chr2_C_albicans_SC5314323007			FALSE
Ca21chr2_C_albicans_SC5314	323013	Ca21chr2_C_albicans_SC5314	334642	Ca21chr2_C_albicans_SC5314323013	Ca21chr2_C_albicans_SC5314334642				Ca21chr2_C_albicans_SC5314323013			FALSE
Ca21chr2_C_albicans_SC5314	331811	Ca21chr2_C_albicans_SC5314	334818	Ca21chr2_C_albicans_SC5314331811	Ca21chr2_C_albicans_SC5314334818				Ca21chr2_C_albicans_SC5314331811			FALSE
Ca21chr2_C_albicans_SC5314	334542	Ca21chr2_C_albicans_SC5314	335447	Ca21chr2_C_albicans_SC5314334542	Ca21chr2_C_albicans_SC5314335447				Ca21chr2_C_albicans_SC5314334542			FALSE
Ca21chr2_C_albicans_SC5314	334625	Ca21chr2_C_albicans_SC5314	337564	Ca21chr2_C_albicans_SC5314334625	Ca21chr2_C_albicans_SC5314337564				Ca21chr2_C_albicans_SC5314334625			FALSE
Ca21chr2_C_albicans_SC5314	334642	Ca21chr2_C_albicans_SC5314	338171	Ca21chr2_C_albicans_SC5314334642	Ca21chr2_C_albicans_SC5314338171				Ca21chr2_C_albicans_SC5314334642			FALSE
Ca21chr2_C_albicans_SC5314	334818	Ca21chr2_C_albicans_SC5314	338827	Ca21chr2_C_albicans_SC5314334818	Ca21chr2_C_albicans_SC5314338827				Ca21chr2_C_albicans_SC5314334818			FALSE
Ca21chr2_C_albicans_SC5314	335447	Ca21chr2_C_albicans_SC5314	339594	Ca21chr2_C_albicans_SC5314335447	Ca21chr2_C_albicans_SC5314339594				Ca21chr2_C_albicans_SC5314335447			FALSE
Ca21chr2_C_albicans_SC5314	337564	Ca21chr2_C_albicans_SC5314	345495	Ca21chr2_C_albicans_SC5314337564	Ca21chr2_C_albicans_SC5314345495				Ca21chr2_C_albicans_SC5314337564			FALSE
Ca21chr2_C_albicans_SC5314	338171	Ca21chr2_C_albicans_SC5314	345499	Ca21chr2_C_albicans_SC5314338171	Ca21chr2_C_albicans_SC5314345499				Ca21chr2_C_albicans_SC5314338171			FALSE
Ca21chr2_C_albicans_SC5314	338827	Ca21chr2_C_albicans_SC5314	346111	Ca21chr2_C_albicans_SC5314338827	Ca21chr2_C_albicans_SC5314346111				Ca21chr2_C_albicans_SC5314338827			FALSE
Ca21chr2_C_albicans_SC5314	339594	Ca21chr2_C_albicans_SC5314	346155	Ca21chr2_C_albicans_SC5314339594	Ca21chr2_C_albicans_SC5314346155				Ca21chr2_C_albicans_SC5314339594			FALSE
Ca21chr2_C_albicans_SC5314	345495	Ca21chr2_C_albicans_SC5314	346236	Ca21chr2_C_albicans_SC5314345495	Ca21chr2_C_albicans_SC5314346236				Ca21chr2_C_albicans_SC5314345495			FALSE
Ca21chr2_C_albicans_SC5314	345499	Ca21chr2_C_albicans_SC5314	351230	Ca21chr2_C_albicans_SC5314345499	Ca21chr2_C_albicans_SC5314351230				Ca21chr2_C_albicans_SC5314345499			FALSE
Ca21chr2_C_albicans_SC5314	346111	Ca21chr2_C_albicans_SC5314	352024	Ca21chr2_C_albicans_SC5314346111	Ca21chr2_C_albicans_SC5314352024				Ca21chr2_C_albicans_SC5314346111			FALSE
Ca21chr2_C_albicans_SC5314	346155	Ca21chr2_C_albicans_SC5314	352210	Ca21chr2_C_albicans_SC5314346155	Ca21chr2_C_albicans_SC5314352210				Ca21chr2_C_albicans_SC5314346155			FALSE
Ca21chr2_C_albicans_SC5314	346236	Ca21chr2_C_albicans_SC5314	352458	Ca21chr2_C_albicans_SC5314346236	Ca21chr2_C_albicans_SC5314352458				Ca21chr2_C_albicans_SC5314346236			FALSE
Ca21chr2_C_albicans_SC5314	351230	Ca21chr2_C_albicans_SC5314	354294	Ca21chr2_C_albicans_SC5314351230	Ca21chr2_C_albicans_SC5314354294				Ca21chr2_C_albicans_SC5314351230			FALSE
Ca21chr2_C_albicans_SC5314	352024	Ca21chr2_C_albicans_SC5314	354596	Ca21chr2_C_albicans_SC5314352024	Ca21chr2_C_albicans_SC5314354596				Ca21chr2_C_albicans_SC5314352024			FALSE
Ca21chr2_C_albicans_SC5314	352210	Ca21chr2_C_albicans_SC5314	354618	Ca21chr2_C_albicans_SC5314352210	Ca21chr2_C_albicans_SC5314354618				Ca21chr2_C_albicans_SC5314352210			FALSE
Ca21chr2_C_albicans_SC5314	352458	Ca21chr2_C_albicans_SC5314	354882	Ca21chr2_C_albicans_SC5314352458	Ca21chr2_C_albicans_SC5314354882				Ca21chr2_C_albicans_SC5314352458			FALSE
Ca21chr2_C_albicans_SC5314	354294	Ca21chr2_C_albicans_SC5314	355078	Ca21chr2_C_albicans_SC5314354294	Ca21chr2_C_albicans_SC5314355078				Ca21chr2_C_albicans_SC5314354294			FALSE
Ca21chr2_C_albicans_SC5314	354596	Ca21chr2_C_albicans_SC5314	355464	Ca21chr2_C_albicans_SC5314354596	Ca21chr2_C_albicans_SC5314355464				Ca21chr2_C_albicans_SC5314354596			FALSE
Ca21chr2_C_albicans_SC5314	354618	Ca21chr2_C_albicans_SC5314	355593	Ca21chr2_C_albicans_SC5314354618	Ca21chr2_C_albicans_SC5314355593				Ca21chr2_C_albicans_SC5314354618			FALSE
Ca21chr2_C_albicans_SC5314	354882	Ca21chr2_C_albicans_SC5314	358698	Ca21chr2_C_albicans_SC5314354882	Ca21chr2_C_albicans_SC5314358698				Ca21chr2_C_albicans_SC5314354882			FALSE
Ca21chr2_C_albicans_SC5314	355078	Ca21chr2_C_albicans_SC5314	358811	Ca21chr2_C_albicans_SC5314355078	Ca21chr2_C_albicans_SC5314358811				Ca21chr2_C_albicans_SC5314355078			FALSE
Ca21chr2_C_albicans_SC5314	355464	Ca21chr2_C_albicans_SC5314	358871	Ca21chr2_C_albicans_SC5314355464	Ca21chr2_C_albicans_SC5314358871				Ca21chr2_C_albicans_SC5314355464			FALSE
Ca21chr2_C_albicans_SC5314	355593	Ca21chr2_C_albicans_SC5314	359187	Ca21chr2_C_albicans_SC5314355593	Ca21chr2_C_albicans_SC5314359187				Ca21chr2_C_albicans_SC5314355593			FALSE
Ca21chr2_C_albicans_SC5314	358698	Ca21chr2_C_albicans_SC5314	359270	Ca21chr2_C_albicans_SC5314358698	Ca21chr2_C_albicans_SC5314359270				Ca21chr2_C_albicans_SC5314358698			FALSE
Ca21chr2_C_albicans_SC5314	358811	Ca21chr2_C_albicans_SC5314	359668	Ca21chr2_C_albicans_SC5314358811	Ca21chr2_C_albicans_SC5314359668				Ca21chr2_C_albicans_SC5314358811			FALSE
Ca21chr2_C_albicans_SC5314	358871	Ca21chr2_C_albicans_SC5314	359760	Ca21chr2_C_albicans_SC5314358871	Ca21chr2_C_albicans_SC5314359760				Ca21chr2_C_albicans_SC5314358871			FALSE
Ca21chr2_C_albicans_SC5314	359187	Ca21chr2_C_albicans_SC5314	359808	Ca21chr2_C_albicans_SC5314359187	Ca21chr2_C_albicans_SC5314359808				Ca21chr2_C_albicans_SC5314359187			FALSE
Ca21chr2_C_albicans_SC5314	359270	Ca21chr2_C_albicans_SC5314	361308	Ca21chr2_C_albicans_SC5314359270	Ca21chr2_C_albicans_SC5314361308				Ca21chr2_C_albicans_SC5314359270			FALSE
Ca21chr2_C_albicans_SC5314	359668	Ca21chr2_C_albicans_SC5314	361415	Ca21chr2_C_albicans_SC5314359668	Ca21chr2_C_albicans_SC5314361415				Ca21chr2_C_albicans_SC5314359668			FALSE
Ca21chr2_C_albicans_SC5314	359760	Ca21chr2_C_albicans_SC5314	361444	Ca21chr2_C_albicans_SC5314359760	Ca21chr2_C_albicans_SC5314361444				Ca21chr2_C_albicans_SC5314359760			FALSE
Ca21chr2_C_albicans_SC5314	359808	Ca21chr2_C_albicans_SC5314	365665	Ca21chr2_C_albicans_SC5314359808	Ca21chr2_C_albicans_SC5314365665				Ca21chr2_C_albicans_SC5314359808			FALSE
Ca21chr2_C_albicans_SC5314	361308	Ca21chr2_C_albicans_SC5314	367352	Ca21chr2_C_albicans_SC5314361308	Ca21chr2_C_albicans_SC5314367352				Ca21chr2_C_albicans_SC5314361308			FALSE
Ca21chr2_C_albicans_SC5314	361415	Ca21chr2_C_albicans_SC5314	367542	Ca21chr2_C_albicans_SC5314361415	Ca21chr2_C_albicans_SC5314367542				Ca21chr2_C_albicans_SC5314361415			FALSE
Ca21chr2_C_albicans_SC5314	361444	Ca21chr2_C_albicans_SC5314	370670	Ca21chr2_C_albicans_SC5314361444	Ca21chr2_C_albicans_SC5314370670				Ca21chr2_C_albicans_SC5314361444			FALSE
Ca21chr2_C_albicans_SC5314	365665	Ca21chr2_C_albicans_SC5314	371592	Ca21chr2_C_albicans_SC5314365665	Ca21chr2_C_albicans_SC5314371592				Ca21chr2_C_albicans_SC5314365665			FALSE
Ca21chr2_C_albicans_SC5314	367352	Ca21chr2_C_albicans_SC5314	375216	Ca21chr2_C_albicans_SC5314367352	Ca21chr2_C_albicans_SC5314375216				Ca21chr2_C_albicans_SC5314367352			FALSE
Ca21chr2_C_albicans_SC5314	367542	Ca21chr2_C_albicans_SC5314	375416	Ca21chr2_C_albicans_SC5314367542	Ca21chr2_C_albicans_SC5314375416				Ca21chr2_C_albicans_SC5314367542			FALSE
Ca21chr2_C_albicans_SC5314	370670	Ca21chr2_C_albicans_SC5314	379469	Ca21chr2_C_albicans_SC5314370670	Ca21chr2_C_albicans_SC5314379469				Ca21chr2_C_albicans_SC5314370670			FALSE
Ca21chr2_C_albicans_SC5314	371592	Ca21chr2_C_albicans_SC5314	379919	Ca21chr2_C_albicans_SC5314371592	Ca21chr2_C_albicans_SC5314379919				Ca21chr2_C_albicans_SC5314371592			FALSE
Ca21chr2_C_albicans_SC5314	375216	Ca21chr2_C_albicans_SC5314	380750	Ca21chr2_C_albicans_SC5314375216	Ca21chr2_C_albicans_SC5314380750				Ca21chr2_C_albicans_SC5314375216			FALSE
Ca21chr2_C_albicans_SC5314	375416	Ca21chr2_C_albicans_SC5314	380756	Ca21chr2_C_albicans_SC5314375416	Ca21chr2_C_albicans_SC5314380756				Ca21chr2_C_albicans_SC5314375416			FALSE
Ca21chr2_C_albicans_SC5314	379919	Ca21chr2_C_albicans_SC5314	380788	Ca21chr2_C_albicans_SC5314379919	Ca21chr2_C_albicans_SC5314380788				Ca21chr2_C_albicans_SC5314379919			FALSE
Ca21chr2_C_albicans_SC5314	380750	Ca21chr2_C_albicans_SC5314	380828	Ca21chr2_C_albicans_SC5314380750	Ca21chr2_C_albicans_SC5314380828				Ca21chr2_C_albicans_SC5314380750			FALSE
Ca21chr2_C_albicans_SC5314	380756	Ca21chr2_C_albicans_SC5314	381959	Ca21chr2_C_albicans_SC5314380756	Ca21chr2_C_albicans_SC5314381959				Ca21chr2_C_albicans_SC5314380756			FALSE
Ca21chr2_C_albicans_SC5314	380788	Ca21chr2_C_albicans_SC5314	382037	Ca21chr2_C_albicans_SC5314380788	Ca21chr2_C_albicans_SC5314382037				Ca21chr2_C_albicans_SC5314380788			FALSE
Ca21chr2_C_albicans_SC5314	380828	Ca21chr2_C_albicans_SC5314	382040	Ca21chr2_C_albicans_SC5314380828	Ca21chr2_C_albicans_SC5314382040				Ca21chr2_C_albicans_SC5314380828			FALSE
Ca21chr2_C_albicans_SC5314	381959	Ca21chr2_C_albicans_SC5314	382265	Ca21chr2_C_albicans_SC5314381959	Ca21chr2_C_albicans_SC5314382265				Ca21chr2_C_albicans_SC5314381959			FALSE
Ca21chr2_C_albicans_SC5314	382037	Ca21chr2_C_albicans_SC5314	382280	Ca21chr2_C_albicans_SC5314382037	Ca21chr2_C_albicans_SC5314382280				Ca21chr2_C_albicans_SC5314382037			FALSE
Ca21chr2_C_albicans_SC5314	382040	Ca21chr2_C_albicans_SC5314	382409	Ca21chr2_C_albicans_SC5314382040	Ca21chr2_C_albicans_SC5314382409				Ca21chr2_C_albicans_SC5314382040			FALSE
Ca21chr2_C_albicans_SC5314	382265	Ca21chr2_C_albicans_SC5314	382923	Ca21chr2_C_albicans_SC5314382265	Ca21chr2_C_albicans_SC5314382923				Ca21chr2_C_albicans_SC5314382265			FALSE
Ca21chr2_C_albicans_SC5314	382280	Ca21chr2_C_albicans_SC5314	382952	Ca21chr2_C_albicans_SC5314382280	Ca21chr2_C_albicans_SC5314382952				Ca21chr2_C_albicans_SC5314382280			FALSE
Ca21chr2_C_albicans_SC5314	382409	Ca21chr2_C_albicans_SC5314	382955	Ca21chr2_C_albicans_SC5314382409	Ca21chr2_C_albicans_SC5314382955				Ca21chr2_C_albicans_SC5314382409			FALSE
Ca21chr2_C_albicans_SC5314	382923	Ca21chr2_C_albicans_SC5314	383068	Ca21chr2_C_albicans_SC5314382923	Ca21chr2_C_albicans_SC5314383068				Ca21chr2_C_albicans_SC5314382923			FALSE
Ca21chr2_C_albicans_SC5314	382952	Ca21chr2_C_albicans_SC5314	383213	Ca21chr2_C_albicans_SC5314382952	Ca21chr2_C_albicans_SC5314383213				Ca21chr2_C_albicans_SC5314382952			FALSE
Ca21chr2_C_albicans_SC5314	382955	Ca21chr2_C_albicans_SC5314	383405	Ca21chr2_C_albicans_SC5314382955	Ca21chr2_C_albicans_SC5314383405				Ca21chr2_C_albicans_SC5314382955			FALSE
Ca21chr2_C_albicans_SC5314	383068	Ca21chr2_C_albicans_SC5314	383464	Ca21chr2_C_albicans_SC5314383068	Ca21chr2_C_albicans_SC5314383464				Ca21chr2_C_albicans_SC5314383068			FALSE
Ca21chr2_C_albicans_SC5314	383213	Ca21chr2_C_albicans_SC5314	383465	Ca21chr2_C_albicans_SC5314383213	Ca21chr2_C_albicans_SC5314383465				Ca21chr2_C_albicans_SC5314383213			FALSE
Ca21chr2_C_albicans_SC5314	383405	Ca21chr2_C_albicans_SC5314	383810	Ca21chr2_C_albicans_SC5314383405	Ca21chr2_C_albicans_SC5314383810				Ca21chr2_C_albicans_SC5314383405			FALSE
Ca21chr2_C_albicans_SC5314	383464	Ca21chr2_C_albicans_SC5314	384223	Ca21chr2_C_albicans_SC5314383464	Ca21chr2_C_albicans_SC5314384223				Ca21chr2_C_albicans_SC5314383464			FALSE
Ca21chr2_C_albicans_SC5314	383465	Ca21chr2_C_albicans_SC5314	384267	Ca21chr2_C_albicans_SC5314383465	Ca21chr2_C_albicans_SC5314384267				Ca21chr2_C_albicans_SC5314383465			FALSE
Ca21chr2_C_albicans_SC5314	383810	Ca21chr2_C_albicans_SC5314	387057	Ca21chr2_C_albicans_SC5314383810	Ca21chr2_C_albicans_SC5314387057				Ca21chr2_C_albicans_SC5314383810			FALSE
Ca21chr2_C_albicans_SC5314	384223	Ca21chr2_C_albicans_SC5314	387127	Ca21chr2_C_albicans_SC5314384223	Ca21chr2_C_albicans_SC5314387127				Ca21chr2_C_albicans_SC5314384223			FALSE
Ca21chr2_C_albicans_SC5314	384267	Ca21chr2_C_albicans_SC5314	387192	Ca21chr2_C_albicans_SC5314384267	Ca21chr2_C_albicans_SC5314387192				Ca21chr2_C_albicans_SC5314384267			FALSE
Ca21chr2_C_albicans_SC5314	387057	Ca21chr2_C_albicans_SC5314	390998	Ca21chr2_C_albicans_SC5314387057	Ca21chr2_C_albicans_SC5314390998				Ca21chr2_C_albicans_SC5314387057			FALSE
Ca21chr2_C_albicans_SC5314	387127	Ca21chr2_C_albicans_SC5314	391046	Ca21chr2_C_albicans_SC5314387127	Ca21chr2_C_albicans_SC5314391046				Ca21chr2_C_albicans_SC5314387127			FALSE
Ca21chr2_C_albicans_SC5314	387192	Ca21chr2_C_albicans_SC5314	391080	Ca21chr2_C_albicans_SC5314387192	Ca21chr2_C_albicans_SC5314391080				Ca21chr2_C_albicans_SC5314387192			FALSE
Ca21chr2_C_albicans_SC5314	390998	Ca21chr2_C_albicans_SC5314	391556	Ca21chr2_C_albicans_SC5314390998	Ca21chr2_C_albicans_SC5314391556				Ca21chr2_C_albicans_SC5314390998			FALSE
Ca21chr2_C_albicans_SC5314	391046	Ca21chr2_C_albicans_SC5314	391655	Ca21chr2_C_albicans_SC5314391046	Ca21chr2_C_albicans_SC5314391655				Ca21chr2_C_albicans_SC5314391046			FALSE
Ca21chr2_C_albicans_SC5314	391080	Ca21chr2_C_albicans_SC5314	391807	Ca21chr2_C_albicans_SC5314391080	Ca21chr2_C_albicans_SC5314391807				Ca21chr2_C_albicans_SC5314391080			FALSE
Ca21chr2_C_albicans_SC5314	391556	Ca21chr2_C_albicans_SC5314	393814	Ca21chr2_C_albicans_SC5314391556	Ca21chr2_C_albicans_SC5314393814				Ca21chr2_C_albicans_SC5314391556			FALSE
Ca21chr2_C_albicans_SC5314	391655	Ca21chr2_C_albicans_SC5314	393880	Ca21chr2_C_albicans_SC5314391655	Ca21chr2_C_albicans_SC5314393880				Ca21chr2_C_albicans_SC5314391655			FALSE
Ca21chr2_C_albicans_SC5314	391807	Ca21chr2_C_albicans_SC5314	394673	Ca21chr2_C_albicans_SC5314391807	Ca21chr2_C_albicans_SC5314394673				Ca21chr2_C_albicans_SC5314391807			FALSE
Ca21chr2_C_albicans_SC5314	393814	Ca21chr2_C_albicans_SC5314	394726	Ca21chr2_C_albicans_SC5314393814	Ca21chr2_C_albicans_SC5314394726				Ca21chr2_C_albicans_SC5314393814			FALSE
Ca21chr2_C_albicans_SC5314	393880	Ca21chr2_C_albicans_SC5314	394764	Ca21chr2_C_albicans_SC5314393880	Ca21chr2_C_albicans_SC5314394764				Ca21chr2_C_albicans_SC5314393880			FALSE
Ca21chr2_C_albicans_SC5314	394673	Ca21chr2_C_albicans_SC5314	394849	Ca21chr2_C_albicans_SC5314394673	Ca21chr2_C_albicans_SC5314394849				Ca21chr2_C_albicans_SC5314394673			FALSE
Ca21chr2_C_albicans_SC5314	394726	Ca21chr2_C_albicans_SC5314	394858	Ca21chr2_C_albicans_SC5314394726	Ca21chr2_C_albicans_SC5314394858				Ca21chr2_C_albicans_SC5314394726			FALSE
Ca21chr2_C_albicans_SC5314	394764	Ca21chr2_C_albicans_SC5314	394892	Ca21chr2_C_albicans_SC5314394764	Ca21chr2_C_albicans_SC5314394892				Ca21chr2_C_albicans_SC5314394764			FALSE
Ca21chr2_C_albicans_SC5314	394849	Ca21chr2_C_albicans_SC5314	394909	Ca21chr2_C_albicans_SC5314394849	Ca21chr2_C_albicans_SC5314394909				Ca21chr2_C_albicans_SC5314394849			FALSE
Ca21chr2_C_albicans_SC5314	394858	Ca21chr2_C_albicans_SC5314	394942	Ca21chr2_C_albicans_SC5314394858	Ca21chr2_C_albicans_SC5314394942				Ca21chr2_C_albicans_SC5314394858			FALSE
Ca21chr2_C_albicans_SC5314	394892	Ca21chr2_C_albicans_SC5314	394947	Ca21chr2_C_albicans_SC5314394892	Ca21chr2_C_albicans_SC5314394947				Ca21chr2_C_albicans_SC5314394892			FALSE
Ca21chr2_C_albicans_SC5314	394909	Ca21chr2_C_albicans_SC5314	394951	Ca21chr2_C_albicans_SC5314394909	Ca21chr2_C_albicans_SC5314394951				Ca21chr2_C_albicans_SC5314394909			FALSE
Ca21chr2_C_albicans_SC5314	394942	Ca21chr2_C_albicans_SC5314	394976	Ca21chr2_C_albicans_SC5314394942	Ca21chr2_C_albicans_SC5314394976				Ca21chr2_C_albicans_SC5314394942			FALSE
Ca21chr2_C_albicans_SC5314	394947	Ca21chr2_C_albicans_SC5314	394986	Ca21chr2_C_albicans_SC5314394947	Ca21chr2_C_albicans_SC5314394986				Ca21chr2_C_albicans_SC5314394947			FALSE
Ca21chr2_C_albicans_SC5314	394951	Ca21chr2_C_albicans_SC5314	395046	Ca21chr2_C_albicans_SC5314394951	Ca21chr2_C_albicans_SC5314395046				Ca21chr2_C_albicans_SC5314394951			FALSE
Ca21chr2_C_albicans_SC5314	394976	Ca21chr2_C_albicans_SC5314	395059	Ca21chr2_C_albicans_SC5314394976	Ca21chr2_C_albicans_SC5314395059				Ca21chr2_C_albicans_SC5314394976			FALSE
Ca21chr2_C_albicans_SC5314	394986	Ca21chr2_C_albicans_SC5314	395089	Ca21chr2_C_albicans_SC5314394986	Ca21chr2_C_albicans_SC5314395089				Ca21chr2_C_albicans_SC5314394986			FALSE
Ca21chr2_C_albicans_SC5314	395046	Ca21chr2_C_albicans_SC5314	395096	Ca21chr2_C_albicans_SC5314395046	Ca21chr2_C_albicans_SC5314395096				Ca21chr2_C_albicans_SC5314395046			FALSE
Ca21chr2_C_albicans_SC5314	395059	Ca21chr2_C_albicans_SC5314	395160	Ca21chr2_C_albicans_SC5314395059	Ca21chr2_C_albicans_SC5314395160				Ca21chr2_C_albicans_SC5314395059			FALSE
Ca21chr2_C_albicans_SC5314	395089	Ca21chr2_C_albicans_SC5314	395530	Ca21chr2_C_albicans_SC5314395089	Ca21chr2_C_albicans_SC5314395530				Ca21chr2_C_albicans_SC5314395089			FALSE
Ca21chr2_C_albicans_SC5314	395096	Ca21chr2_C_albicans_SC5314	395572	Ca21chr2_C_albicans_SC5314395096	Ca21chr2_C_albicans_SC5314395572				Ca21chr2_C_albicans_SC5314395096			FALSE
Ca21chr2_C_albicans_SC5314	395160	Ca21chr2_C_albicans_SC5314	395648	Ca21chr2_C_albicans_SC5314395160	Ca21chr2_C_albicans_SC5314395648				Ca21chr2_C_albicans_SC5314395160			FALSE
Ca21chr2_C_albicans_SC5314	395530	Ca21chr2_C_albicans_SC5314	395763	Ca21chr2_C_albicans_SC5314395530	Ca21chr2_C_albicans_SC5314395763				Ca21chr2_C_albicans_SC5314395530			FALSE
Ca21chr2_C_albicans_SC5314	395572	Ca21chr2_C_albicans_SC5314	395905	Ca21chr2_C_albicans_SC5314395572	Ca21chr2_C_albicans_SC5314395905				Ca21chr2_C_albicans_SC5314395572			FALSE
Ca21chr2_C_albicans_SC5314	395648	Ca21chr2_C_albicans_SC5314	395986	Ca21chr2_C_albicans_SC5314395648	Ca21chr2_C_albicans_SC5314395986				Ca21chr2_C_albicans_SC5314395648			FALSE
Ca21chr2_C_albicans_SC5314	395763	Ca21chr2_C_albicans_SC5314	396055	Ca21chr2_C_albicans_SC5314395763	Ca21chr2_C_albicans_SC5314396055				Ca21chr2_C_albicans_SC5314395763			FALSE
Ca21chr2_C_albicans_SC5314	395905	Ca21chr2_C_albicans_SC5314	396091	Ca21chr2_C_albicans_SC5314395905	Ca21chr2_C_albicans_SC5314396091				Ca21chr2_C_albicans_SC5314395905			FALSE
Ca21chr2_C_albicans_SC5314	395986	Ca21chr2_C_albicans_SC5314	396873	Ca21chr2_C_albicans_SC5314395986	Ca21chr2_C_albicans_SC5314396873				Ca21chr2_C_albicans_SC5314395986			FALSE
Ca21chr2_C_albicans_SC5314	396055	Ca21chr2_C_albicans_SC5314	396890	Ca21chr2_C_albicans_SC5314396055	Ca21chr2_C_albicans_SC5314396890				Ca21chr2_C_albicans_SC5314396055			FALSE
Ca21chr2_C_albicans_SC5314	396091	Ca21chr2_C_albicans_SC5314	396895	Ca21chr2_C_albicans_SC5314396091	Ca21chr2_C_albicans_SC5314396895				Ca21chr2_C_albicans_SC5314396091			FALSE
Ca21chr2_C_albicans_SC5314	396873	Ca21chr2_C_albicans_SC5314	397198	Ca21chr2_C_albicans_SC5314396873	Ca21chr2_C_albicans_SC5314397198				Ca21chr2_C_albicans_SC5314396873			FALSE
Ca21chr2_C_albicans_SC5314	396890	Ca21chr2_C_albicans_SC5314	398320	Ca21chr2_C_albicans_SC5314396890	Ca21chr2_C_albicans_SC5314398320				Ca21chr2_C_albicans_SC5314396890			FALSE
Ca21chr2_C_albicans_SC5314	396895	Ca21chr2_C_albicans_SC5314	398442	Ca21chr2_C_albicans_SC5314396895	Ca21chr2_C_albicans_SC5314398442				Ca21chr2_C_albicans_SC5314396895			FALSE
Ca21chr2_C_albicans_SC5314	397198	Ca21chr2_C_albicans_SC5314	398685	Ca21chr2_C_albicans_SC5314397198	Ca21chr2_C_albicans_SC5314398685				Ca21chr2_C_albicans_SC5314397198			FALSE
Ca21chr2_C_albicans_SC5314	398320	Ca21chr2_C_albicans_SC5314	398713	Ca21chr2_C_albicans_SC5314398320	Ca21chr2_C_albicans_SC5314398713				Ca21chr2_C_albicans_SC5314398320			FALSE
Ca21chr2_C_albicans_SC5314	398442	Ca21chr2_C_albicans_SC5314	398771	Ca21chr2_C_albicans_SC5314398442	Ca21chr2_C_albicans_SC5314398771				Ca21chr2_C_albicans_SC5314398442			FALSE
Ca21chr2_C_albicans_SC5314	398685	Ca21chr2_C_albicans_SC5314	399625	Ca21chr2_C_albicans_SC5314398685	Ca21chr2_C_albicans_SC5314399625				Ca21chr2_C_albicans_SC5314398685			FALSE
Ca21chr2_C_albicans_SC5314	398713	Ca21chr2_C_albicans_SC5314	399733	Ca21chr2_C_albicans_SC5314398713	Ca21chr2_C_albicans_SC5314399733				Ca21chr2_C_albicans_SC5314398713			FALSE
Ca21chr2_C_albicans_SC5314	398771	Ca21chr2_C_albicans_SC5314	399805	Ca21chr2_C_albicans_SC5314398771	Ca21chr2_C_albicans_SC5314399805				Ca21chr2_C_albicans_SC5314398771			FALSE
Ca21chr2_C_albicans_SC5314	399625	Ca21chr2_C_albicans_SC5314	400156	Ca21chr2_C_albicans_SC5314399625	Ca21chr2_C_albicans_SC5314400156				Ca21chr2_C_albicans_SC5314399625			FALSE
Ca21chr2_C_albicans_SC5314	399733	Ca21chr2_C_albicans_SC5314	400537	Ca21chr2_C_albicans_SC5314399733	Ca21chr2_C_albicans_SC5314400537				Ca21chr2_C_albicans_SC5314399733			FALSE
Ca21chr2_C_albicans_SC5314	399805	Ca21chr2_C_albicans_SC5314	400723	Ca21chr2_C_albicans_SC5314399805	Ca21chr2_C_albicans_SC5314400723				Ca21chr2_C_albicans_SC5314399805			FALSE
Ca21chr2_C_albicans_SC5314	400156	Ca21chr2_C_albicans_SC5314	400885	Ca21chr2_C_albicans_SC5314400156	Ca21chr2_C_albicans_SC5314400885				Ca21chr2_C_albicans_SC5314400156			FALSE
Ca21chr2_C_albicans_SC5314	400537	Ca21chr2_C_albicans_SC5314	401027	Ca21chr2_C_albicans_SC5314400537	Ca21chr2_C_albicans_SC5314401027				Ca21chr2_C_albicans_SC5314400537			FALSE
Ca21chr2_C_albicans_SC5314	400723	Ca21chr2_C_albicans_SC5314	401065	Ca21chr2_C_albicans_SC5314400723	Ca21chr2_C_albicans_SC5314401065				Ca21chr2_C_albicans_SC5314400723			FALSE
Ca21chr2_C_albicans_SC5314	400885	Ca21chr2_C_albicans_SC5314	401189	Ca21chr2_C_albicans_SC5314400885	Ca21chr2_C_albicans_SC5314401189				Ca21chr2_C_albicans_SC5314400885			FALSE
Ca21chr2_C_albicans_SC5314	401027	Ca21chr2_C_albicans_SC5314	401203	Ca21chr2_C_albicans_SC5314401027	Ca21chr2_C_albicans_SC5314401203				Ca21chr2_C_albicans_SC5314401027			FALSE
Ca21chr2_C_albicans_SC5314	401065	Ca21chr2_C_albicans_SC5314	402550	Ca21chr2_C_albicans_SC5314401065	Ca21chr2_C_albicans_SC5314402550				Ca21chr2_C_albicans_SC5314401065			FALSE
Ca21chr2_C_albicans_SC5314	401189	Ca21chr2_C_albicans_SC5314	402601	Ca21chr2_C_albicans_SC5314401189	Ca21chr2_C_albicans_SC5314402601				Ca21chr2_C_albicans_SC5314401189			FALSE
Ca21chr2_C_albicans_SC5314	401203	Ca21chr2_C_albicans_SC5314	402745	Ca21chr2_C_albicans_SC5314401203	Ca21chr2_C_albicans_SC5314402745				Ca21chr2_C_albicans_SC5314401203			FALSE
Ca21chr2_C_albicans_SC5314	402550	Ca21chr2_C_albicans_SC5314	402763	Ca21chr2_C_albicans_SC5314402550	Ca21chr2_C_albicans_SC5314402763				Ca21chr2_C_albicans_SC5314402550			FALSE
Ca21chr2_C_albicans_SC5314	402601	Ca21chr2_C_albicans_SC5314	402802	Ca21chr2_C_albicans_SC5314402601	Ca21chr2_C_albicans_SC5314402802				Ca21chr2_C_albicans_SC5314402601			FALSE
Ca21chr2_C_albicans_SC5314	402745	Ca21chr2_C_albicans_SC5314	402805	Ca21chr2_C_albicans_SC5314402745	Ca21chr2_C_albicans_SC5314402805				Ca21chr2_C_albicans_SC5314402745			FALSE
Ca21chr2_C_albicans_SC5314	402763	Ca21chr2_C_albicans_SC5314	402922	Ca21chr2_C_albicans_SC5314402763	Ca21chr2_C_albicans_SC5314402922				Ca21chr2_C_albicans_SC5314402763			FALSE
Ca21chr2_C_albicans_SC5314	402802	Ca21chr2_C_albicans_SC5314	403210	Ca21chr2_C_albicans_SC5314402802	Ca21chr2_C_albicans_SC5314403210				Ca21chr2_C_albicans_SC5314402802			FALSE
Ca21chr2_C_albicans_SC5314	402805	Ca21chr2_C_albicans_SC5314	405788	Ca21chr2_C_albicans_SC5314402805	Ca21chr2_C_albicans_SC5314405788				Ca21chr2_C_albicans_SC5314402805			FALSE
Ca21chr2_C_albicans_SC5314	402922	Ca21chr2_C_albicans_SC5314	405817	Ca21chr2_C_albicans_SC5314402922	Ca21chr2_C_albicans_SC5314405817				Ca21chr2_C_albicans_SC5314402922			FALSE
Ca21chr2_C_albicans_SC5314	403210	Ca21chr2_C_albicans_SC5314	405922	Ca21chr2_C_albicans_SC5314403210	Ca21chr2_C_albicans_SC5314405922				Ca21chr2_C_albicans_SC5314403210			FALSE
Ca21chr2_C_albicans_SC5314	405788	Ca21chr2_C_albicans_SC5314	406065	Ca21chr2_C_albicans_SC5314405788	Ca21chr2_C_albicans_SC5314406065				Ca21chr2_C_albicans_SC5314405788			FALSE
Ca21chr2_C_albicans_SC5314	405817	Ca21chr2_C_albicans_SC5314	406084	Ca21chr2_C_albicans_SC5314405817	Ca21chr2_C_albicans_SC5314406084				Ca21chr2_C_albicans_SC5314405817			FALSE
Ca21chr2_C_albicans_SC5314	405922	Ca21chr2_C_albicans_SC5314	406115	Ca21chr2_C_albicans_SC5314405922	Ca21chr2_C_albicans_SC5314406115				Ca21chr2_C_albicans_SC5314405922			FALSE
Ca21chr2_C_albicans_SC5314	406065	Ca21chr2_C_albicans_SC5314	406398	Ca21chr2_C_albicans_SC5314406065	Ca21chr2_C_albicans_SC5314406398				Ca21chr2_C_albicans_SC5314406065			FALSE
Ca21chr2_C_albicans_SC5314	406084	Ca21chr2_C_albicans_SC5314	406470	Ca21chr2_C_albicans_SC5314406084	Ca21chr2_C_albicans_SC5314406470				Ca21chr2_C_albicans_SC5314406084			FALSE
Ca21chr2_C_albicans_SC5314	406115	Ca21chr2_C_albicans_SC5314	406471	Ca21chr2_C_albicans_SC5314406115	Ca21chr2_C_albicans_SC5314406471				Ca21chr2_C_albicans_SC5314406115			FALSE
Ca21chr2_C_albicans_SC5314	406398	Ca21chr2_C_albicans_SC5314	406501	Ca21chr2_C_albicans_SC5314406398	Ca21chr2_C_albicans_SC5314406501				Ca21chr2_C_albicans_SC5314406398			FALSE
Ca21chr2_C_albicans_SC5314	406470	Ca21chr2_C_albicans_SC5314	406527	Ca21chr2_C_albicans_SC5314406470	Ca21chr2_C_albicans_SC5314406527				Ca21chr2_C_albicans_SC5314406470			FALSE
Ca21chr2_C_albicans_SC5314	406471	Ca21chr2_C_albicans_SC5314	406720	Ca21chr2_C_albicans_SC5314406471	Ca21chr2_C_albicans_SC5314406720				Ca21chr2_C_albicans_SC5314406471			FALSE
Ca21chr2_C_albicans_SC5314	406501	Ca21chr2_C_albicans_SC5314	406824	Ca21chr2_C_albicans_SC5314406501	Ca21chr2_C_albicans_SC5314406824				Ca21chr2_C_albicans_SC5314406501			FALSE
Ca21chr2_C_albicans_SC5314	406527	Ca21chr2_C_albicans_SC5314	406957	Ca21chr2_C_albicans_SC5314406527	Ca21chr2_C_albicans_SC5314406957				Ca21chr2_C_albicans_SC5314406527			FALSE
Ca21chr2_C_albicans_SC5314	406720	Ca21chr2_C_albicans_SC5314	406962	Ca21chr2_C_albicans_SC5314406720	Ca21chr2_C_albicans_SC5314406962				Ca21chr2_C_albicans_SC5314406720			FALSE
Ca21chr2_C_albicans_SC5314	406824	Ca21chr2_C_albicans_SC5314	406993	Ca21chr2_C_albicans_SC5314406824	Ca21chr2_C_albicans_SC5314406993				Ca21chr2_C_albicans_SC5314406824			FALSE
Ca21chr2_C_albicans_SC5314	406957	Ca21chr2_C_albicans_SC5314	408287	Ca21chr2_C_albicans_SC5314406957	Ca21chr2_C_albicans_SC5314408287				Ca21chr2_C_albicans_SC5314406957			FALSE
Ca21chr2_C_albicans_SC5314	406962	Ca21chr2_C_albicans_SC5314	408617	Ca21chr2_C_albicans_SC5314406962	Ca21chr2_C_albicans_SC5314408617				Ca21chr2_C_albicans_SC5314406962			FALSE
Ca21chr2_C_albicans_SC5314	406993	Ca21chr2_C_albicans_SC5314	411496	Ca21chr2_C_albicans_SC5314406993	Ca21chr2_C_albicans_SC5314411496				Ca21chr2_C_albicans_SC5314406993			FALSE
Ca21chr2_C_albicans_SC5314	408287	Ca21chr2_C_albicans_SC5314	411572	Ca21chr2_C_albicans_SC5314408287	Ca21chr2_C_albicans_SC5314411572				Ca21chr2_C_albicans_SC5314408287			FALSE
Ca21chr2_C_albicans_SC5314	408617	Ca21chr2_C_albicans_SC5314	411704	Ca21chr2_C_albicans_SC5314408617	Ca21chr2_C_albicans_SC5314411704				Ca21chr2_C_albicans_SC5314408617			FALSE
Ca21chr2_C_albicans_SC5314	411496	Ca21chr2_C_albicans_SC5314	411782	Ca21chr2_C_albicans_SC5314411496	Ca21chr2_C_albicans_SC5314411782				Ca21chr2_C_albicans_SC5314411496			FALSE
Ca21chr2_C_albicans_SC5314	411704	Ca21chr2_C_albicans_SC5314	412082	Ca21chr2_C_albicans_SC5314411704	Ca21chr2_C_albicans_SC5314412082				Ca21chr2_C_albicans_SC5314411704			FALSE
Ca21chr2_C_albicans_SC5314	411782	Ca21chr2_C_albicans_SC5314	412175	Ca21chr2_C_albicans_SC5314411782	Ca21chr2_C_albicans_SC5314412175				Ca21chr2_C_albicans_SC5314411782			FALSE
Ca21chr2_C_albicans_SC5314	412082	Ca21chr2_C_albicans_SC5314	412177	Ca21chr2_C_albicans_SC5314412082	Ca21chr2_C_albicans_SC5314412177				Ca21chr2_C_albicans_SC5314412082			FALSE
Ca21chr2_C_albicans_SC5314	412175	Ca21chr2_C_albicans_SC5314	413448	Ca21chr2_C_albicans_SC5314412175	Ca21chr2_C_albicans_SC5314413448				Ca21chr2_C_albicans_SC5314412175			FALSE
Ca21chr2_C_albicans_SC5314	412177	Ca21chr2_C_albicans_SC5314	414338	Ca21chr2_C_albicans_SC5314412177	Ca21chr2_C_albicans_SC5314414338				Ca21chr2_C_albicans_SC5314412177			FALSE
Ca21chr2_C_albicans_SC5314	413448	Ca21chr2_C_albicans_SC5314	414344	Ca21chr2_C_albicans_SC5314413448	Ca21chr2_C_albicans_SC5314414344				Ca21chr2_C_albicans_SC5314413448			FALSE
Ca21chr2_C_albicans_SC5314	414338	Ca21chr2_C_albicans_SC5314	414386	Ca21chr2_C_albicans_SC5314414338	Ca21chr2_C_albicans_SC5314414386				Ca21chr2_C_albicans_SC5314414338			FALSE
Ca21chr2_C_albicans_SC5314	414344	Ca21chr2_C_albicans_SC5314	414466	Ca21chr2_C_albicans_SC5314414344	Ca21chr2_C_albicans_SC5314414466				Ca21chr2_C_albicans_SC5314414344			FALSE
Ca21chr2_C_albicans_SC5314	414386	Ca21chr2_C_albicans_SC5314	417968	Ca21chr2_C_albicans_SC5314414386	Ca21chr2_C_albicans_SC5314417968				Ca21chr2_C_albicans_SC5314414386			FALSE
Ca21chr2_C_albicans_SC5314	414466	Ca21chr2_C_albicans_SC5314	418043	Ca21chr2_C_albicans_SC5314414466	Ca21chr2_C_albicans_SC5314418043				Ca21chr2_C_albicans_SC5314414466			FALSE
Ca21chr2_C_albicans_SC5314	417968	Ca21chr2_C_albicans_SC5314	418149	Ca21chr2_C_albicans_SC5314417968	Ca21chr2_C_albicans_SC5314418149				Ca21chr2_C_albicans_SC5314417968			FALSE
Ca21chr2_C_albicans_SC5314	418043	Ca21chr2_C_albicans_SC5314	418448	Ca21chr2_C_albicans_SC5314418043	Ca21chr2_C_albicans_SC5314418448				Ca21chr2_C_albicans_SC5314418043			FALSE
Ca21chr2_C_albicans_SC5314	418149	Ca21chr2_C_albicans_SC5314	418673	Ca21chr2_C_albicans_SC5314418149	Ca21chr2_C_albicans_SC5314418673				Ca21chr2_C_albicans_SC5314418149			FALSE
Ca21chr2_C_albicans_SC5314	418448	Ca21chr2_C_albicans_SC5314	418734	Ca21chr2_C_albicans_SC5314418448	Ca21chr2_C_albicans_SC5314418734				Ca21chr2_C_albicans_SC5314418448			FALSE
Ca21chr2_C_albicans_SC5314	418673	Ca21chr2_C_albicans_SC5314	418814	Ca21chr2_C_albicans_SC5314418673	Ca21chr2_C_albicans_SC5314418814				Ca21chr2_C_albicans_SC5314418673			FALSE
Ca21chr2_C_albicans_SC5314	418734	Ca21chr2_C_albicans_SC5314	420661	Ca21chr2_C_albicans_SC5314418734	Ca21chr2_C_albicans_SC5314420661				Ca21chr2_C_albicans_SC5314418734			FALSE
Ca21chr2_C_albicans_SC5314	418814	Ca21chr2_C_albicans_SC5314	420912	Ca21chr2_C_albicans_SC5314418814	Ca21chr2_C_albicans_SC5314420912				Ca21chr2_C_albicans_SC5314418814			FALSE
Ca21chr2_C_albicans_SC5314	420661	Ca21chr2_C_albicans_SC5314	421044	Ca21chr2_C_albicans_SC5314420661	Ca21chr2_C_albicans_SC5314421044				Ca21chr2_C_albicans_SC5314420661			FALSE
Ca21chr2_C_albicans_SC5314	420912	Ca21chr2_C_albicans_SC5314	421150	Ca21chr2_C_albicans_SC5314420912	Ca21chr2_C_albicans_SC5314421150				Ca21chr2_C_albicans_SC5314420912			FALSE
Ca21chr2_C_albicans_SC5314	421044	Ca21chr2_C_albicans_SC5314	421266	Ca21chr2_C_albicans_SC5314421044	Ca21chr2_C_albicans_SC5314421266				Ca21chr2_C_albicans_SC5314421044			FALSE
Ca21chr2_C_albicans_SC5314	421150	Ca21chr2_C_albicans_SC5314	421509	Ca21chr2_C_albicans_SC5314421150	Ca21chr2_C_albicans_SC5314421509				Ca21chr2_C_albicans_SC5314421150			FALSE
Ca21chr2_C_albicans_SC5314	421266	Ca21chr2_C_albicans_SC5314	425793	Ca21chr2_C_albicans_SC5314421266	Ca21chr2_C_albicans_SC5314425793				Ca21chr2_C_albicans_SC5314421266			FALSE
Ca21chr2_C_albicans_SC5314	421509	Ca21chr2_C_albicans_SC5314	427690	Ca21chr2_C_albicans_SC5314421509	Ca21chr2_C_albicans_SC5314427690				Ca21chr2_C_albicans_SC5314421509			FALSE
Ca21chr2_C_albicans_SC5314	425793	Ca21chr2_C_albicans_SC5314	427767	Ca21chr2_C_albicans_SC5314425793	Ca21chr2_C_albicans_SC5314427767				Ca21chr2_C_albicans_SC5314425793			FALSE
Ca21chr2_C_albicans_SC5314	427690	Ca21chr2_C_albicans_SC5314	427786	Ca21chr2_C_albicans_SC5314427690	Ca21chr2_C_albicans_SC5314427786				Ca21chr2_C_albicans_SC5314427690			FALSE
Ca21chr2_C_albicans_SC5314	427767	Ca21chr2_C_albicans_SC5314	427844	Ca21chr2_C_albicans_SC5314427767	Ca21chr2_C_albicans_SC5314427844				Ca21chr2_C_albicans_SC5314427767			FALSE
Ca21chr2_C_albicans_SC5314	427786	Ca21chr2_C_albicans_SC5314	427851	Ca21chr2_C_albicans_SC5314427786	Ca21chr2_C_albicans_SC5314427851				Ca21chr2_C_albicans_SC5314427786			FALSE
Ca21chr2_C_albicans_SC5314	427844	Ca21chr2_C_albicans_SC5314	429830	Ca21chr2_C_albicans_SC5314427844	Ca21chr2_C_albicans_SC5314429830				Ca21chr2_C_albicans_SC5314427844			FALSE
Ca21chr2_C_albicans_SC5314	427851	Ca21chr2_C_albicans_SC5314	430044	Ca21chr2_C_albicans_SC5314427851	Ca21chr2_C_albicans_SC5314430044				Ca21chr2_C_albicans_SC5314427851			FALSE
Ca21chr2_C_albicans_SC5314	429830	Ca21chr2_C_albicans_SC5314	434926	Ca21chr2_C_albicans_SC5314429830	Ca21chr2_C_albicans_SC5314434926				Ca21chr2_C_albicans_SC5314429830			FALSE
Ca21chr2_C_albicans_SC5314	430044	Ca21chr2_C_albicans_SC5314	435911	Ca21chr2_C_albicans_SC5314430044	Ca21chr2_C_albicans_SC5314435911				Ca21chr2_C_albicans_SC5314430044			FALSE
Ca21chr2_C_albicans_SC5314	434926	Ca21chr2_C_albicans_SC5314	435973	Ca21chr2_C_albicans_SC5314434926	Ca21chr2_C_albicans_SC5314435973				Ca21chr2_C_albicans_SC5314434926			FALSE
Ca21chr2_C_albicans_SC5314	435911	Ca21chr2_C_albicans_SC5314	435999	Ca21chr2_C_albicans_SC5314435911	Ca21chr2_C_albicans_SC5314435999				Ca21chr2_C_albicans_SC5314435911			FALSE
Ca21chr2_C_albicans_SC5314	435973	Ca21chr2_C_albicans_SC5314	437858	Ca21chr2_C_albicans_SC5314435973	Ca21chr2_C_albicans_SC5314437858				Ca21chr2_C_albicans_SC5314435973			FALSE
Ca21chr2_C_albicans_SC5314	435999	Ca21chr2_C_albicans_SC5314	437911	Ca21chr2_C_albicans_SC5314435999	Ca21chr2_C_albicans_SC5314437911				Ca21chr2_C_albicans_SC5314435999			FALSE
Ca21chr2_C_albicans_SC5314	437858	Ca21chr2_C_albicans_SC5314	443806	Ca21chr2_C_albicans_SC5314437858	Ca21chr2_C_albicans_SC5314443806				Ca21chr2_C_albicans_SC5314437858			FALSE
Ca21chr2_C_albicans_SC5314	437911	Ca21chr2_C_albicans_SC5314	443809	Ca21chr2_C_albicans_SC5314437911	Ca21chr2_C_albicans_SC5314443809				Ca21chr2_C_albicans_SC5314437911			FALSE
Ca21chr2_C_albicans_SC5314	443806	Ca21chr2_C_albicans_SC5314	443892	Ca21chr2_C_albicans_SC5314443806	Ca21chr2_C_albicans_SC5314443892				Ca21chr2_C_albicans_SC5314443806			FALSE
Ca21chr2_C_albicans_SC5314	443809	Ca21chr2_C_albicans_SC5314	443895	Ca21chr2_C_albicans_SC5314443809	Ca21chr2_C_albicans_SC5314443895				Ca21chr2_C_albicans_SC5314443809			FALSE
Ca21chr2_C_albicans_SC5314	443892	Ca21chr2_C_albicans_SC5314	444232	Ca21chr2_C_albicans_SC5314443892	Ca21chr2_C_albicans_SC5314444232				Ca21chr2_C_albicans_SC5314443892			FALSE
Ca21chr2_C_albicans_SC5314	443895	Ca21chr2_C_albicans_SC5314	449008	Ca21chr2_C_albicans_SC5314443895	Ca21chr2_C_albicans_SC5314449008				Ca21chr2_C_albicans_SC5314443895			FALSE
Ca21chr2_C_albicans_SC5314	444232	Ca21chr2_C_albicans_SC5314	449383	Ca21chr2_C_albicans_SC5314444232	Ca21chr2_C_albicans_SC5314449383				Ca21chr2_C_albicans_SC5314444232			FALSE
Ca21chr2_C_albicans_SC5314	449008	Ca21chr2_C_albicans_SC5314	449569	Ca21chr2_C_albicans_SC5314449008	Ca21chr2_C_albicans_SC5314449569				Ca21chr2_C_albicans_SC5314449008			FALSE
Ca21chr2_C_albicans_SC5314	449383	Ca21chr2_C_albicans_SC5314	456576	Ca21chr2_C_albicans_SC5314449383	Ca21chr2_C_albicans_SC5314456576				Ca21chr2_C_albicans_SC5314449383			FALSE
Ca21chr2_C_albicans_SC5314	449569	Ca21chr2_C_albicans_SC5314	456579	Ca21chr2_C_albicans_SC5314449569	Ca21chr2_C_albicans_SC5314456579				Ca21chr2_C_albicans_SC5314449569			FALSE
Ca21chr2_C_albicans_SC5314	456576	Ca21chr2_C_albicans_SC5314	456582	Ca21chr2_C_albicans_SC5314456576	Ca21chr2_C_albicans_SC5314456582				Ca21chr2_C_albicans_SC5314456576			FALSE
Ca21chr2_C_albicans_SC5314	456579	Ca21chr2_C_albicans_SC5314	456588	Ca21chr2_C_albicans_SC5314456579	Ca21chr2_C_albicans_SC5314456588				Ca21chr2_C_albicans_SC5314456579			FALSE
Ca21chr2_C_albicans_SC5314	456582	Ca21chr2_C_albicans_SC5314	456606	Ca21chr2_C_albicans_SC5314456582	Ca21chr2_C_albicans_SC5314456606				Ca21chr2_C_albicans_SC5314456582			FALSE
Ca21chr2_C_albicans_SC5314	456588	Ca21chr2_C_albicans_SC5314	456954	Ca21chr2_C_albicans_SC5314456588	Ca21chr2_C_albicans_SC5314456954				Ca21chr2_C_albicans_SC5314456588			FALSE
Ca21chr2_C_albicans_SC5314	456606	Ca21chr2_C_albicans_SC5314	458330	Ca21chr2_C_albicans_SC5314456606	Ca21chr2_C_albicans_SC5314458330				Ca21chr2_C_albicans_SC5314456606			FALSE
Ca21chr2_C_albicans_SC5314	456954	Ca21chr2_C_albicans_SC5314	458403	Ca21chr2_C_albicans_SC5314456954	Ca21chr2_C_albicans_SC5314458403				Ca21chr2_C_albicans_SC5314456954			FALSE
Ca21chr2_C_albicans_SC5314	458330	Ca21chr2_C_albicans_SC5314	458413	Ca21chr2_C_albicans_SC5314458330	Ca21chr2_C_albicans_SC5314458413				Ca21chr2_C_albicans_SC5314458330			FALSE
Ca21chr2_C_albicans_SC5314	458403	Ca21chr2_C_albicans_SC5314	458420	Ca21chr2_C_albicans_SC5314458403	Ca21chr2_C_albicans_SC5314458420				Ca21chr2_C_albicans_SC5314458403			FALSE
Ca21chr2_C_albicans_SC5314	458413	Ca21chr2_C_albicans_SC5314	458549	Ca21chr2_C_albicans_SC5314458413	Ca21chr2_C_albicans_SC5314458549				Ca21chr2_C_albicans_SC5314458413			FALSE
Ca21chr2_C_albicans_SC5314	458420	Ca21chr2_C_albicans_SC5314	458551	Ca21chr2_C_albicans_SC5314458420	Ca21chr2_C_albicans_SC5314458551				Ca21chr2_C_albicans_SC5314458420			FALSE
Ca21chr2_C_albicans_SC5314	458549	Ca21chr2_C_albicans_SC5314	458555	Ca21chr2_C_albicans_SC5314458549	Ca21chr2_C_albicans_SC5314458555				Ca21chr2_C_albicans_SC5314458549			FALSE
Ca21chr2_C_albicans_SC5314	458551	Ca21chr2_C_albicans_SC5314	459002	Ca21chr2_C_albicans_SC5314458551	Ca21chr2_C_albicans_SC5314459002				Ca21chr2_C_albicans_SC5314458551			FALSE
Ca21chr2_C_albicans_SC5314	458555	Ca21chr2_C_albicans_SC5314	459021	Ca21chr2_C_albicans_SC5314458555	Ca21chr2_C_albicans_SC5314459021				Ca21chr2_C_albicans_SC5314458555			FALSE
Ca21chr2_C_albicans_SC5314	459002	Ca21chr2_C_albicans_SC5314	459029	Ca21chr2_C_albicans_SC5314459002	Ca21chr2_C_albicans_SC5314459029				Ca21chr2_C_albicans_SC5314459002			FALSE
Ca21chr2_C_albicans_SC5314	459021	Ca21chr2_C_albicans_SC5314	459074	Ca21chr2_C_albicans_SC5314459021	Ca21chr2_C_albicans_SC5314459074				Ca21chr2_C_albicans_SC5314459021			FALSE
Ca21chr2_C_albicans_SC5314	459029	Ca21chr2_C_albicans_SC5314	459081	Ca21chr2_C_albicans_SC5314459029	Ca21chr2_C_albicans_SC5314459081				Ca21chr2_C_albicans_SC5314459029			FALSE
Ca21chr2_C_albicans_SC5314	459074	Ca21chr2_C_albicans_SC5314	459083	Ca21chr2_C_albicans_SC5314459074	Ca21chr2_C_albicans_SC5314459083				Ca21chr2_C_albicans_SC5314459074			FALSE
Ca21chr2_C_albicans_SC5314	459081	Ca21chr2_C_albicans_SC5314	459219	Ca21chr2_C_albicans_SC5314459081	Ca21chr2_C_albicans_SC5314459219				Ca21chr2_C_albicans_SC5314459081			FALSE
Ca21chr2_C_albicans_SC5314	459083	Ca21chr2_C_albicans_SC5314	459398	Ca21chr2_C_albicans_SC5314459083	Ca21chr2_C_albicans_SC5314459398				Ca21chr2_C_albicans_SC5314459083			FALSE
Ca21chr2_C_albicans_SC5314	459219	Ca21chr2_C_albicans_SC5314	459453	Ca21chr2_C_albicans_SC5314459219	Ca21chr2_C_albicans_SC5314459453				Ca21chr2_C_albicans_SC5314459219			FALSE
Ca21chr2_C_albicans_SC5314	459398	Ca21chr2_C_albicans_SC5314	459465	Ca21chr2_C_albicans_SC5314459398	Ca21chr2_C_albicans_SC5314459465				Ca21chr2_C_albicans_SC5314459398			FALSE
Ca21chr2_C_albicans_SC5314	459453	Ca21chr2_C_albicans_SC5314	459511	Ca21chr2_C_albicans_SC5314459453	Ca21chr2_C_albicans_SC5314459511				Ca21chr2_C_albicans_SC5314459453			FALSE
Ca21chr2_C_albicans_SC5314	459465	Ca21chr2_C_albicans_SC5314	459515	Ca21chr2_C_albicans_SC5314459465	Ca21chr2_C_albicans_SC5314459515				Ca21chr2_C_albicans_SC5314459465			FALSE
Ca21chr2_C_albicans_SC5314	459511	Ca21chr2_C_albicans_SC5314	459518	Ca21chr2_C_albicans_SC5314459511	Ca21chr2_C_albicans_SC5314459518				Ca21chr2_C_albicans_SC5314459511			FALSE
Ca21chr2_C_albicans_SC5314	459515	Ca21chr2_C_albicans_SC5314	460444	Ca21chr2_C_albicans_SC5314459515	Ca21chr2_C_albicans_SC5314460444				Ca21chr2_C_albicans_SC5314459515			FALSE
Ca21chr2_C_albicans_SC5314	459518	Ca21chr2_C_albicans_SC5314	460447	Ca21chr2_C_albicans_SC5314459518	Ca21chr2_C_albicans_SC5314460447				Ca21chr2_C_albicans_SC5314459518			FALSE
Ca21chr2_C_albicans_SC5314	460444	Ca21chr2_C_albicans_SC5314	460449	Ca21chr2_C_albicans_SC5314460444	Ca21chr2_C_albicans_SC5314460449				Ca21chr2_C_albicans_SC5314460444			FALSE
Ca21chr2_C_albicans_SC5314	460447	Ca21chr2_C_albicans_SC5314	462023	Ca21chr2_C_albicans_SC5314460447	Ca21chr2_C_albicans_SC5314462023				Ca21chr2_C_albicans_SC5314460447			FALSE
Ca21chr2_C_albicans_SC5314	460449	Ca21chr2_C_albicans_SC5314	462935	Ca21chr2_C_albicans_SC5314460449	Ca21chr2_C_albicans_SC5314462935				Ca21chr2_C_albicans_SC5314460449			FALSE
Ca21chr2_C_albicans_SC5314	462935	Ca21chr2_C_albicans_SC5314	462965	Ca21chr2_C_albicans_SC5314462935	Ca21chr2_C_albicans_SC5314462965				Ca21chr2_C_albicans_SC5314462935			FALSE
Ca21chr2_C_albicans_SC5314	462965	Ca21chr2_C_albicans_SC5314	463030	Ca21chr2_C_albicans_SC5314462965	Ca21chr2_C_albicans_SC5314463030				Ca21chr2_C_albicans_SC5314462965			FALSE
Ca21chr2_C_albicans_SC5314	463030	Ca21chr2_C_albicans_SC5314	463043	Ca21chr2_C_albicans_SC5314463030	Ca21chr2_C_albicans_SC5314463043				Ca21chr2_C_albicans_SC5314463030			FALSE
Ca21chr2_C_albicans_SC5314	463043	Ca21chr2_C_albicans_SC5314	463046	Ca21chr2_C_albicans_SC5314463043	Ca21chr2_C_albicans_SC5314463046				Ca21chr2_C_albicans_SC5314463043			FALSE
Ca21chr2_C_albicans_SC5314	463046	Ca21chr2_C_albicans_SC5314	463064	Ca21chr2_C_albicans_SC5314463046	Ca21chr2_C_albicans_SC5314463064				Ca21chr2_C_albicans_SC5314463046			FALSE
Ca21chr2_C_albicans_SC5314	463064	Ca21chr2_C_albicans_SC5314	463073	Ca21chr2_C_albicans_SC5314463064	Ca21chr2_C_albicans_SC5314463073				Ca21chr2_C_albicans_SC5314463064			FALSE
Ca21chr2_C_albicans_SC5314	463073	Ca21chr2_C_albicans_SC5314	463163	Ca21chr2_C_albicans_SC5314463073	Ca21chr2_C_albicans_SC5314463163				Ca21chr2_C_albicans_SC5314463073			FALSE
Ca21chr2_C_albicans_SC5314	463163	Ca21chr2_C_albicans_SC5314	463391	Ca21chr2_C_albicans_SC5314463163	Ca21chr2_C_albicans_SC5314463391				Ca21chr2_C_albicans_SC5314463163			FALSE
Ca21chr2_C_albicans_SC5314	463391	Ca21chr2_C_albicans_SC5314	463412	Ca21chr2_C_albicans_SC5314463391	Ca21chr2_C_albicans_SC5314463412				Ca21chr2_C_albicans_SC5314463391			FALSE
Ca21chr2_C_albicans_SC5314	463412	Ca21chr2_C_albicans_SC5314	463523	Ca21chr2_C_albicans_SC5314463412	Ca21chr2_C_albicans_SC5314463523				Ca21chr2_C_albicans_SC5314463412			FALSE
Ca21chr2_C_albicans_SC5314	463523	Ca21chr2_C_albicans_SC5314	463570	Ca21chr2_C_albicans_SC5314463523	Ca21chr2_C_albicans_SC5314463570				Ca21chr2_C_albicans_SC5314463523			FALSE
Ca21chr2_C_albicans_SC5314	463570	Ca21chr2_C_albicans_SC5314	464601	Ca21chr2_C_albicans_SC5314463570	Ca21chr2_C_albicans_SC5314464601				Ca21chr2_C_albicans_SC5314463570			FALSE
Ca21chr2_C_albicans_SC5314	464601	Ca21chr2_C_albicans_SC5314	464618	Ca21chr2_C_albicans_SC5314464601	Ca21chr2_C_albicans_SC5314464618				Ca21chr2_C_albicans_SC5314464601			FALSE
Ca21chr2_C_albicans_SC5314	464618	Ca21chr2_C_albicans_SC5314	464695	Ca21chr2_C_albicans_SC5314464618	Ca21chr2_C_albicans_SC5314464695				Ca21chr2_C_albicans_SC5314464618			FALSE
Ca21chr2_C_albicans_SC5314	464695	Ca21chr2_C_albicans_SC5314	464737	Ca21chr2_C_albicans_SC5314464695	Ca21chr2_C_albicans_SC5314464737				Ca21chr2_C_albicans_SC5314464695			FALSE
Ca21chr2_C_albicans_SC5314	464737	Ca21chr2_C_albicans_SC5314	464769	Ca21chr2_C_albicans_SC5314464737	Ca21chr2_C_albicans_SC5314464769				Ca21chr2_C_albicans_SC5314464737			FALSE
Ca21chr2_C_albicans_SC5314	464769	Ca21chr2_C_albicans_SC5314	465186	Ca21chr2_C_albicans_SC5314464769	Ca21chr2_C_albicans_SC5314465186				Ca21chr2_C_albicans_SC5314464769			FALSE
Ca21chr2_C_albicans_SC5314	465186	Ca21chr2_C_albicans_SC5314	465501	Ca21chr2_C_albicans_SC5314465186	Ca21chr2_C_albicans_SC5314465501				Ca21chr2_C_albicans_SC5314465186			FALSE
Ca21chr2_C_albicans_SC5314	465501	Ca21chr2_C_albicans_SC5314	465502	Ca21chr2_C_albicans_SC5314465501	Ca21chr2_C_albicans_SC5314465502				Ca21chr2_C_albicans_SC5314465501			FALSE
Ca21chr2_C_albicans_SC5314	465502	Ca21chr2_C_albicans_SC5314	465978	Ca21chr2_C_albicans_SC5314465502	Ca21chr2_C_albicans_SC5314465978				Ca21chr2_C_albicans_SC5314465502			FALSE
Ca21chr2_C_albicans_SC5314	465978	Ca21chr2_C_albicans_SC5314	465979	Ca21chr2_C_albicans_SC5314465978	Ca21chr2_C_albicans_SC5314465979				Ca21chr2_C_albicans_SC5314465978			FALSE
Ca21chr2_C_albicans_SC5314	465979	Ca21chr2_C_albicans_SC5314	465984	Ca21chr2_C_albicans_SC5314465979	Ca21chr2_C_albicans_SC5314465984				Ca21chr2_C_albicans_SC5314465979			FALSE
Ca21chr2_C_albicans_SC5314	465984	Ca21chr2_C_albicans_SC5314	465987	Ca21chr2_C_albicans_SC5314465984	Ca21chr2_C_albicans_SC5314465987				Ca21chr2_C_albicans_SC5314465984			FALSE
Ca21chr2_C_albicans_SC5314	465987	Ca21chr2_C_albicans_SC5314	466003	Ca21chr2_C_albicans_SC5314465987	Ca21chr2_C_albicans_SC5314466003				Ca21chr2_C_albicans_SC5314465987			FALSE
Ca21chr2_C_albicans_SC5314	466003	Ca21chr2_C_albicans_SC5314	466004	Ca21chr2_C_albicans_SC5314466003	Ca21chr2_C_albicans_SC5314466004				Ca21chr2_C_albicans_SC5314466003			FALSE
Ca21chr2_C_albicans_SC5314	466004	Ca21chr2_C_albicans_SC5314	466005	Ca21chr2_C_albicans_SC5314466004	Ca21chr2_C_albicans_SC5314466005				Ca21chr2_C_albicans_SC5314466004			FALSE
Ca21chr2_C_albicans_SC5314	466005	Ca21chr2_C_albicans_SC5314	466010	Ca21chr2_C_albicans_SC5314466005	Ca21chr2_C_albicans_SC5314466010				Ca21chr2_C_albicans_SC5314466005			FALSE
Ca21chr2_C_albicans_SC5314	466010	Ca21chr2_C_albicans_SC5314	466014	Ca21chr2_C_albicans_SC5314466010	Ca21chr2_C_albicans_SC5314466014				Ca21chr2_C_albicans_SC5314466010			FALSE
Ca21chr2_C_albicans_SC5314	466014	Ca21chr2_C_albicans_SC5314	466017	Ca21chr2_C_albicans_SC5314466014	Ca21chr2_C_albicans_SC5314466017				Ca21chr2_C_albicans_SC5314466014			FALSE
Ca21chr2_C_albicans_SC5314	466017	Ca21chr2_C_albicans_SC5314	466036	Ca21chr2_C_albicans_SC5314466017	Ca21chr2_C_albicans_SC5314466036				Ca21chr2_C_albicans_SC5314466017			FALSE
Ca21chr2_C_albicans_SC5314	466036	Ca21chr2_C_albicans_SC5314	466039	Ca21chr2_C_albicans_SC5314466036	Ca21chr2_C_albicans_SC5314466039				Ca21chr2_C_albicans_SC5314466036			FALSE
Ca21chr2_C_albicans_SC5314	466039	Ca21chr2_C_albicans_SC5314	466057	Ca21chr2_C_albicans_SC5314466039	Ca21chr2_C_albicans_SC5314466057				Ca21chr2_C_albicans_SC5314466039			FALSE
Ca21chr2_C_albicans_SC5314	466057	Ca21chr2_C_albicans_SC5314	466059	Ca21chr2_C_albicans_SC5314466057	Ca21chr2_C_albicans_SC5314466059				Ca21chr2_C_albicans_SC5314466057			FALSE
Ca21chr2_C_albicans_SC5314	466059	Ca21chr2_C_albicans_SC5314	466064	Ca21chr2_C_albicans_SC5314466059	Ca21chr2_C_albicans_SC5314466064				Ca21chr2_C_albicans_SC5314466059			FALSE
Ca21chr2_C_albicans_SC5314	466064	Ca21chr2_C_albicans_SC5314	466071	Ca21chr2_C_albicans_SC5314466064	Ca21chr2_C_albicans_SC5314466071				Ca21chr2_C_albicans_SC5314466064			FALSE
Ca21chr2_C_albicans_SC5314	466071	Ca21chr2_C_albicans_SC5314	466073	Ca21chr2_C_albicans_SC5314466071	Ca21chr2_C_albicans_SC5314466073				Ca21chr2_C_albicans_SC5314466071			FALSE
Ca21chr2_C_albicans_SC5314	466073	Ca21chr2_C_albicans_SC5314	466074	Ca21chr2_C_albicans_SC5314466073	Ca21chr2_C_albicans_SC5314466074				Ca21chr2_C_albicans_SC5314466073			FALSE
Ca21chr2_C_albicans_SC5314	466074	Ca21chr2_C_albicans_SC5314	466076	Ca21chr2_C_albicans_SC5314466074	Ca21chr2_C_albicans_SC5314466076				Ca21chr2_C_albicans_SC5314466074			FALSE
Ca21chr2_C_albicans_SC5314	466076	Ca21chr2_C_albicans_SC5314	466104	Ca21chr2_C_albicans_SC5314466076	Ca21chr2_C_albicans_SC5314466104				Ca21chr2_C_albicans_SC5314466076			FALSE
Ca21chr2_C_albicans_SC5314	466104	Ca21chr2_C_albicans_SC5314	466113	Ca21chr2_C_albicans_SC5314466104	Ca21chr2_C_albicans_SC5314466113				Ca21chr2_C_albicans_SC5314466104			FALSE
Ca21chr2_C_albicans_SC5314	466113	Ca21chr2_C_albicans_SC5314	466120	Ca21chr2_C_albicans_SC5314466113	Ca21chr2_C_albicans_SC5314466120				Ca21chr2_C_albicans_SC5314466113			FALSE
Ca21chr2_C_albicans_SC5314	466120	Ca21chr2_C_albicans_SC5314	466121	Ca21chr2_C_albicans_SC5314466120	Ca21chr2_C_albicans_SC5314466121				Ca21chr2_C_albicans_SC5314466120			FALSE
Ca21chr2_C_albicans_SC5314	466121	Ca21chr2_C_albicans_SC5314	466125	Ca21chr2_C_albicans_SC5314466121	Ca21chr2_C_albicans_SC5314466125				Ca21chr2_C_albicans_SC5314466121			FALSE
Ca21chr2_C_albicans_SC5314	466125	Ca21chr2_C_albicans_SC5314	466131	Ca21chr2_C_albicans_SC5314466125	Ca21chr2_C_albicans_SC5314466131				Ca21chr2_C_albicans_SC5314466125			FALSE
Ca21chr2_C_albicans_SC5314	466131	Ca21chr2_C_albicans_SC5314	466144	Ca21chr2_C_albicans_SC5314466131	Ca21chr2_C_albicans_SC5314466144				Ca21chr2_C_albicans_SC5314466131			FALSE
Ca21chr2_C_albicans_SC5314	466144	Ca21chr2_C_albicans_SC5314	466195	Ca21chr2_C_albicans_SC5314466144	Ca21chr2_C_albicans_SC5314466195				Ca21chr2_C_albicans_SC5314466144			FALSE
Ca21chr2_C_albicans_SC5314	466195	Ca21chr2_C_albicans_SC5314	466209	Ca21chr2_C_albicans_SC5314466195	Ca21chr2_C_albicans_SC5314466209				Ca21chr2_C_albicans_SC5314466195			FALSE
Ca21chr2_C_albicans_SC5314	466209	Ca21chr2_C_albicans_SC5314	466211	Ca21chr2_C_albicans_SC5314466209	Ca21chr2_C_albicans_SC5314466211				Ca21chr2_C_albicans_SC5314466209			FALSE
Ca21chr2_C_albicans_SC5314	466211	Ca21chr2_C_albicans_SC5314	466222	Ca21chr2_C_albicans_SC5314466211	Ca21chr2_C_albicans_SC5314466222				Ca21chr2_C_albicans_SC5314466211			FALSE
Ca21chr2_C_albicans_SC5314	466222	Ca21chr2_C_albicans_SC5314	466250	Ca21chr2_C_albicans_SC5314466222	Ca21chr2_C_albicans_SC5314466250				Ca21chr2_C_albicans_SC5314466222			FALSE
Ca21chr2_C_albicans_SC5314	466250	Ca21chr2_C_albicans_SC5314	466254	Ca21chr2_C_albicans_SC5314466250	Ca21chr2_C_albicans_SC5314466254				Ca21chr2_C_albicans_SC5314466250			FALSE
Ca21chr2_C_albicans_SC5314	466254	Ca21chr2_C_albicans_SC5314	466258	Ca21chr2_C_albicans_SC5314466254	Ca21chr2_C_albicans_SC5314466258				Ca21chr2_C_albicans_SC5314466254			FALSE
Ca21chr2_C_albicans_SC5314	466258	Ca21chr2_C_albicans_SC5314	466287	Ca21chr2_C_albicans_SC5314466258	Ca21chr2_C_albicans_SC5314466287				Ca21chr2_C_albicans_SC5314466258			FALSE
Ca21chr2_C_albicans_SC5314	466287	Ca21chr2_C_albicans_SC5314	466320	Ca21chr2_C_albicans_SC5314466287	Ca21chr2_C_albicans_SC5314466320				Ca21chr2_C_albicans_SC5314466287			FALSE
Ca21chr2_C_albicans_SC5314	466320	Ca21chr2_C_albicans_SC5314	466322	Ca21chr2_C_albicans_SC5314466320	Ca21chr2_C_albicans_SC5314466322				Ca21chr2_C_albicans_SC5314466320			FALSE
Ca21chr2_C_albicans_SC5314	466322	Ca21chr2_C_albicans_SC5314	466323	Ca21chr2_C_albicans_SC5314466322	Ca21chr2_C_albicans_SC5314466323				Ca21chr2_C_albicans_SC5314466322			FALSE
Ca21chr2_C_albicans_SC5314	466323	Ca21chr2_C_albicans_SC5314	466326	Ca21chr2_C_albicans_SC5314466323	Ca21chr2_C_albicans_SC5314466326				Ca21chr2_C_albicans_SC5314466323			FALSE
Ca21chr2_C_albicans_SC5314	466326	Ca21chr2_C_albicans_SC5314	466328	Ca21chr2_C_albicans_SC5314466326	Ca21chr2_C_albicans_SC5314466328				Ca21chr2_C_albicans_SC5314466326			FALSE
Ca21chr2_C_albicans_SC5314	466328	Ca21chr2_C_albicans_SC5314	466346	Ca21chr2_C_albicans_SC5314466328	Ca21chr2_C_albicans_SC5314466346				Ca21chr2_C_albicans_SC5314466328			FALSE
Ca21chr2_C_albicans_SC5314	466346	Ca21chr2_C_albicans_SC5314	466352	Ca21chr2_C_albicans_SC5314466346	Ca21chr2_C_albicans_SC5314466352				Ca21chr2_C_albicans_SC5314466346			FALSE
Ca21chr2_C_albicans_SC5314	466352	Ca21chr2_C_albicans_SC5314	466356	Ca21chr2_C_albicans_SC5314466352	Ca21chr2_C_albicans_SC5314466356				Ca21chr2_C_albicans_SC5314466352			FALSE
Ca21chr2_C_albicans_SC5314	466356	Ca21chr2_C_albicans_SC5314	466358	Ca21chr2_C_albicans_SC5314466356	Ca21chr2_C_albicans_SC5314466358				Ca21chr2_C_albicans_SC5314466356			FALSE
Ca21chr2_C_albicans_SC5314	466358	Ca21chr2_C_albicans_SC5314	466359	Ca21chr2_C_albicans_SC5314466358	Ca21chr2_C_albicans_SC5314466359				Ca21chr2_C_albicans_SC5314466358			FALSE
Ca21chr2_C_albicans_SC5314	466359	Ca21chr2_C_albicans_SC5314	466362	Ca21chr2_C_albicans_SC5314466359	Ca21chr2_C_albicans_SC5314466362				Ca21chr2_C_albicans_SC5314466359			FALSE
Ca21chr2_C_albicans_SC5314	466362	Ca21chr2_C_albicans_SC5314	466368	Ca21chr2_C_albicans_SC5314466362	Ca21chr2_C_albicans_SC5314466368				Ca21chr2_C_albicans_SC5314466362			FALSE
Ca21chr2_C_albicans_SC5314	466368	Ca21chr2_C_albicans_SC5314	466373	Ca21chr2_C_albicans_SC5314466368	Ca21chr2_C_albicans_SC5314466373				Ca21chr2_C_albicans_SC5314466368			FALSE
Ca21chr2_C_albicans_SC5314	466373	Ca21chr2_C_albicans_SC5314	466383	Ca21chr2_C_albicans_SC5314466373	Ca21chr2_C_albicans_SC5314466383				Ca21chr2_C_albicans_SC5314466373			FALSE
Ca21chr2_C_albicans_SC5314	466383	Ca21chr2_C_albicans_SC5314	466396	Ca21chr2_C_albicans_SC5314466383	Ca21chr2_C_albicans_SC5314466396				Ca21chr2_C_albicans_SC5314466383			FALSE
Ca21chr2_C_albicans_SC5314	466396	Ca21chr2_C_albicans_SC5314	466437	Ca21chr2_C_albicans_SC5314466396	Ca21chr2_C_albicans_SC5314466437				Ca21chr2_C_albicans_SC5314466396			FALSE
Ca21chr2_C_albicans_SC5314	466437	Ca21chr2_C_albicans_SC5314	466451	Ca21chr2_C_albicans_SC5314466437	Ca21chr2_C_albicans_SC5314466451				Ca21chr2_C_albicans_SC5314466437			FALSE
Ca21chr2_C_albicans_SC5314	466451	Ca21chr2_C_albicans_SC5314	466467	Ca21chr2_C_albicans_SC5314466451	Ca21chr2_C_albicans_SC5314466467				Ca21chr2_C_albicans_SC5314466451			FALSE
Ca21chr2_C_albicans_SC5314	466467	Ca21chr2_C_albicans_SC5314	466473	Ca21chr2_C_albicans_SC5314466467	Ca21chr2_C_albicans_SC5314466473				Ca21chr2_C_albicans_SC5314466467			FALSE
Ca21chr2_C_albicans_SC5314	466473	Ca21chr2_C_albicans_SC5314	466482	Ca21chr2_C_albicans_SC5314466473	Ca21chr2_C_albicans_SC5314466482				Ca21chr2_C_albicans_SC5314466473			FALSE
Ca21chr2_C_albicans_SC5314	466482	Ca21chr2_C_albicans_SC5314	466483	Ca21chr2_C_albicans_SC5314466482	Ca21chr2_C_albicans_SC5314466483				Ca21chr2_C_albicans_SC5314466482			FALSE
Ca21chr2_C_albicans_SC5314	466483	Ca21chr2_C_albicans_SC5314	466488	Ca21chr2_C_albicans_SC5314466483	Ca21chr2_C_albicans_SC5314466488				Ca21chr2_C_albicans_SC5314466483			FALSE
Ca21chr2_C_albicans_SC5314	466488	Ca21chr2_C_albicans_SC5314	466555	Ca21chr2_C_albicans_SC5314466488	Ca21chr2_C_albicans_SC5314466555				Ca21chr2_C_albicans_SC5314466488			FALSE
Ca21chr2_C_albicans_SC5314	466555	Ca21chr2_C_albicans_SC5314	466728	Ca21chr2_C_albicans_SC5314466555	Ca21chr2_C_albicans_SC5314466728				Ca21chr2_C_albicans_SC5314466555			FALSE
Ca21chr2_C_albicans_SC5314	466728	Ca21chr2_C_albicans_SC5314	466763	Ca21chr2_C_albicans_SC5314466728	Ca21chr2_C_albicans_SC5314466763				Ca21chr2_C_albicans_SC5314466728			FALSE
Ca21chr2_C_albicans_SC5314	466763	Ca21chr2_C_albicans_SC5314	466818	Ca21chr2_C_albicans_SC5314466763	Ca21chr2_C_albicans_SC5314466818				Ca21chr2_C_albicans_SC5314466763			FALSE
Ca21chr2_C_albicans_SC5314	466818	Ca21chr2_C_albicans_SC5314	466851	Ca21chr2_C_albicans_SC5314466818	Ca21chr2_C_albicans_SC5314466851				Ca21chr2_C_albicans_SC5314466818			FALSE
Ca21chr2_C_albicans_SC5314	466851	Ca21chr2_C_albicans_SC5314	466857	Ca21chr2_C_albicans_SC5314466851	Ca21chr2_C_albicans_SC5314466857				Ca21chr2_C_albicans_SC5314466851			FALSE
Ca21chr2_C_albicans_SC5314	466857	Ca21chr2_C_albicans_SC5314	466920	Ca21chr2_C_albicans_SC5314466857	Ca21chr2_C_albicans_SC5314466920				Ca21chr2_C_albicans_SC5314466857			FALSE
Ca21chr2_C_albicans_SC5314	466920	Ca21chr2_C_albicans_SC5314	466935	Ca21chr2_C_albicans_SC5314466920	Ca21chr2_C_albicans_SC5314466935				Ca21chr2_C_albicans_SC5314466920			FALSE
Ca21chr2_C_albicans_SC5314	466935	Ca21chr2_C_albicans_SC5314	467019	Ca21chr2_C_albicans_SC5314466935	Ca21chr2_C_albicans_SC5314467019				Ca21chr2_C_albicans_SC5314466935			FALSE
Ca21chr2_C_albicans_SC5314	467019	Ca21chr2_C_albicans_SC5314	467073	Ca21chr2_C_albicans_SC5314467019	Ca21chr2_C_albicans_SC5314467073				Ca21chr2_C_albicans_SC5314467019			FALSE
Ca21chr2_C_albicans_SC5314	467073	Ca21chr2_C_albicans_SC5314	467082	Ca21chr2_C_albicans_SC5314467073	Ca21chr2_C_albicans_SC5314467082				Ca21chr2_C_albicans_SC5314467073			FALSE
Ca21chr2_C_albicans_SC5314	467082	Ca21chr2_C_albicans_SC5314	467157	Ca21chr2_C_albicans_SC5314467082	Ca21chr2_C_albicans_SC5314467157				Ca21chr2_C_albicans_SC5314467082			FALSE
Ca21chr2_C_albicans_SC5314	467157	Ca21chr2_C_albicans_SC5314	467175	Ca21chr2_C_albicans_SC5314467157	Ca21chr2_C_albicans_SC5314467175				Ca21chr2_C_albicans_SC5314467157			FALSE
Ca21chr2_C_albicans_SC5314	467175	Ca21chr2_C_albicans_SC5314	467268	Ca21chr2_C_albicans_SC5314467175	Ca21chr2_C_albicans_SC5314467268				Ca21chr2_C_albicans_SC5314467175			FALSE
Ca21chr2_C_albicans_SC5314	467268	Ca21chr2_C_albicans_SC5314	467274	Ca21chr2_C_albicans_SC5314467268	Ca21chr2_C_albicans_SC5314467274				Ca21chr2_C_albicans_SC5314467268			FALSE
Ca21chr2_C_albicans_SC5314	467274	Ca21chr2_C_albicans_SC5314	467277	Ca21chr2_C_albicans_SC5314467274	Ca21chr2_C_albicans_SC5314467277				Ca21chr2_C_albicans_SC5314467274			FALSE
Ca21chr2_C_albicans_SC5314	467277	Ca21chr2_C_albicans_SC5314	467292	Ca21chr2_C_albicans_SC5314467277	Ca21chr2_C_albicans_SC5314467292				Ca21chr2_C_albicans_SC5314467277			FALSE
Ca21chr2_C_albicans_SC5314	467292	Ca21chr2_C_albicans_SC5314	467295	Ca21chr2_C_albicans_SC5314467292	Ca21chr2_C_albicans_SC5314467295				Ca21chr2_C_albicans_SC5314467292			FALSE
Ca21chr2_C_albicans_SC5314	467295	Ca21chr2_C_albicans_SC5314	467313	Ca21chr2_C_albicans_SC5314467295	Ca21chr2_C_albicans_SC5314467313				Ca21chr2_C_albicans_SC5314467295			FALSE
Ca21chr2_C_albicans_SC5314	467313	Ca21chr2_C_albicans_SC5314	467343	Ca21chr2_C_albicans_SC5314467313	Ca21chr2_C_albicans_SC5314467343				Ca21chr2_C_albicans_SC5314467313			FALSE
Ca21chr2_C_albicans_SC5314	467343	Ca21chr2_C_albicans_SC5314	467523	Ca21chr2_C_albicans_SC5314467343	Ca21chr2_C_albicans_SC5314467523				Ca21chr2_C_albicans_SC5314467343			FALSE
Ca21chr2_C_albicans_SC5314	467523	Ca21chr2_C_albicans_SC5314	467784	Ca21chr2_C_albicans_SC5314467523	Ca21chr2_C_albicans_SC5314467784				Ca21chr2_C_albicans_SC5314467523			FALSE
Ca21chr2_C_albicans_SC5314	467784	Ca21chr2_C_albicans_SC5314	467811	Ca21chr2_C_albicans_SC5314467784	Ca21chr2_C_albicans_SC5314467811				Ca21chr2_C_albicans_SC5314467784			FALSE
Ca21chr2_C_albicans_SC5314	467811	Ca21chr2_C_albicans_SC5314	467928	Ca21chr2_C_albicans_SC5314467811	Ca21chr2_C_albicans_SC5314467928				Ca21chr2_C_albicans_SC5314467811			FALSE
Ca21chr2_C_albicans_SC5314	467928	Ca21chr2_C_albicans_SC5314	467937	Ca21chr2_C_albicans_SC5314467928	Ca21chr2_C_albicans_SC5314467937				Ca21chr2_C_albicans_SC5314467928			FALSE
Ca21chr2_C_albicans_SC5314	467937	Ca21chr2_C_albicans_SC5314	467969	Ca21chr2_C_albicans_SC5314467937	Ca21chr2_C_albicans_SC5314467969				Ca21chr2_C_albicans_SC5314467937			FALSE
Ca21chr2_C_albicans_SC5314	467969	Ca21chr2_C_albicans_SC5314	467984	Ca21chr2_C_albicans_SC5314467969	Ca21chr2_C_albicans_SC5314467984				Ca21chr2_C_albicans_SC5314467969			FALSE
Ca21chr2_C_albicans_SC5314	467984	Ca21chr2_C_albicans_SC5314	468623	Ca21chr2_C_albicans_SC5314467984	Ca21chr2_C_albicans_SC5314468623				Ca21chr2_C_albicans_SC5314467984			FALSE
Ca21chr2_C_albicans_SC5314	468623	Ca21chr2_C_albicans_SC5314	468626	Ca21chr2_C_albicans_SC5314468623	Ca21chr2_C_albicans_SC5314468626				Ca21chr2_C_albicans_SC5314468623			FALSE
Ca21chr2_C_albicans_SC5314	468626	Ca21chr2_C_albicans_SC5314	468644	Ca21chr2_C_albicans_SC5314468626	Ca21chr2_C_albicans_SC5314468644				Ca21chr2_C_albicans_SC5314468626			FALSE
Ca21chr2_C_albicans_SC5314	468644	Ca21chr2_C_albicans_SC5314	468650	Ca21chr2_C_albicans_SC5314468644	Ca21chr2_C_albicans_SC5314468650				Ca21chr2_C_albicans_SC5314468644			FALSE
Ca21chr2_C_albicans_SC5314	468650	Ca21chr2_C_albicans_SC5314	468651	Ca21chr2_C_albicans_SC5314468650	Ca21chr2_C_albicans_SC5314468651				Ca21chr2_C_albicans_SC5314468650			FALSE
Ca21chr2_C_albicans_SC5314	468651	Ca21chr2_C_albicans_SC5314	468656	Ca21chr2_C_albicans_SC5314468651	Ca21chr2_C_albicans_SC5314468656				Ca21chr2_C_albicans_SC5314468651			FALSE
Ca21chr2_C_albicans_SC5314	468656	Ca21chr2_C_albicans_SC5314	468658	Ca21chr2_C_albicans_SC5314468656	Ca21chr2_C_albicans_SC5314468658				Ca21chr2_C_albicans_SC5314468656			FALSE
Ca21chr2_C_albicans_SC5314	468658	Ca21chr2_C_albicans_SC5314	468878	Ca21chr2_C_albicans_SC5314468658	Ca21chr2_C_albicans_SC5314468878				Ca21chr2_C_albicans_SC5314468658			FALSE
Ca21chr2_C_albicans_SC5314	468878	Ca21chr2_C_albicans_SC5314	468905	Ca21chr2_C_albicans_SC5314468878	Ca21chr2_C_albicans_SC5314468905				Ca21chr2_C_albicans_SC5314468878			FALSE
Ca21chr2_C_albicans_SC5314	468905	Ca21chr2_C_albicans_SC5314	468955	Ca21chr2_C_albicans_SC5314468905	Ca21chr2_C_albicans_SC5314468955				Ca21chr2_C_albicans_SC5314468905			FALSE
Ca21chr2_C_albicans_SC5314	468955	Ca21chr2_C_albicans_SC5314	469049	Ca21chr2_C_albicans_SC5314468955	Ca21chr2_C_albicans_SC5314469049				Ca21chr2_C_albicans_SC5314468955			FALSE
Ca21chr2_C_albicans_SC5314	469049	Ca21chr2_C_albicans_SC5314	469103	Ca21chr2_C_albicans_SC5314469049	Ca21chr2_C_albicans_SC5314469103				Ca21chr2_C_albicans_SC5314469049			FALSE
Ca21chr2_C_albicans_SC5314	469103	Ca21chr2_C_albicans_SC5314	469112	Ca21chr2_C_albicans_SC5314469103	Ca21chr2_C_albicans_SC5314469112				Ca21chr2_C_albicans_SC5314469103			FALSE
Ca21chr2_C_albicans_SC5314	469112	Ca21chr2_C_albicans_SC5314	469120	Ca21chr2_C_albicans_SC5314469112	Ca21chr2_C_albicans_SC5314469120				Ca21chr2_C_albicans_SC5314469112			FALSE
Ca21chr2_C_albicans_SC5314	469120	Ca21chr2_C_albicans_SC5314	469124	Ca21chr2_C_albicans_SC5314469120	Ca21chr2_C_albicans_SC5314469124				Ca21chr2_C_albicans_SC5314469120			FALSE
Ca21chr2_C_albicans_SC5314	469124	Ca21chr2_C_albicans_SC5314	469172	Ca21chr2_C_albicans_SC5314469124	Ca21chr2_C_albicans_SC5314469172				Ca21chr2_C_albicans_SC5314469124			FALSE
Ca21chr2_C_albicans_SC5314	469172	Ca21chr2_C_albicans_SC5314	469708	Ca21chr2_C_albicans_SC5314469172	Ca21chr2_C_albicans_SC5314469708				Ca21chr2_C_albicans_SC5314469172			FALSE
Ca21chr2_C_albicans_SC5314	469708	Ca21chr2_C_albicans_SC5314	477559	Ca21chr2_C_albicans_SC5314469708	Ca21chr2_C_albicans_SC5314477559				Ca21chr2_C_albicans_SC5314469708			FALSE
Ca21chr2_C_albicans_SC5314	477559	Ca21chr2_C_albicans_SC5314	477677	Ca21chr2_C_albicans_SC5314477559	Ca21chr2_C_albicans_SC5314477677				Ca21chr2_C_albicans_SC5314477559			FALSE
Ca21chr2_C_albicans_SC5314	477677	Ca21chr2_C_albicans_SC5314	477862	Ca21chr2_C_albicans_SC5314477677	Ca21chr2_C_albicans_SC5314477862				Ca21chr2_C_albicans_SC5314477677			FALSE
Ca21chr2_C_albicans_SC5314	477862	Ca21chr2_C_albicans_SC5314	478120	Ca21chr2_C_albicans_SC5314477862	Ca21chr2_C_albicans_SC5314478120				Ca21chr2_C_albicans_SC5314477862			FALSE
Ca21chr2_C_albicans_SC5314	478120	Ca21chr2_C_albicans_SC5314	479139	Ca21chr2_C_albicans_SC5314478120	Ca21chr2_C_albicans_SC5314479139				Ca21chr2_C_albicans_SC5314478120			FALSE
Ca21chr2_C_albicans_SC5314	479139	Ca21chr2_C_albicans_SC5314	479610	Ca21chr2_C_albicans_SC5314479139	Ca21chr2_C_albicans_SC5314479610				Ca21chr2_C_albicans_SC5314479139			FALSE
Ca21chr2_C_albicans_SC5314	479610	Ca21chr2_C_albicans_SC5314	480138	Ca21chr2_C_albicans_SC5314479610	Ca21chr2_C_albicans_SC5314480138				Ca21chr2_C_albicans_SC5314479610			FALSE
Ca21chr2_C_albicans_SC5314	480138	Ca21chr2_C_albicans_SC5314	480141	Ca21chr2_C_albicans_SC5314480138	Ca21chr2_C_albicans_SC5314480141				Ca21chr2_C_albicans_SC5314480138			FALSE
Ca21chr2_C_albicans_SC5314	480141	Ca21chr2_C_albicans_SC5314	480144	Ca21chr2_C_albicans_SC5314480141	Ca21chr2_C_albicans_SC5314480144				Ca21chr2_C_albicans_SC5314480141			FALSE
Ca21chr2_C_albicans_SC5314	480144	Ca21chr2_C_albicans_SC5314	480153	Ca21chr2_C_albicans_SC5314480144	Ca21chr2_C_albicans_SC5314480153				Ca21chr2_C_albicans_SC5314480144			FALSE
Ca21chr2_C_albicans_SC5314	480153	Ca21chr2_C_albicans_SC5314	480225	Ca21chr2_C_albicans_SC5314480153	Ca21chr2_C_albicans_SC5314480225				Ca21chr2_C_albicans_SC5314480153			FALSE
Ca21chr2_C_albicans_SC5314	480225	Ca21chr2_C_albicans_SC5314	480228	Ca21chr2_C_albicans_SC5314480225	Ca21chr2_C_albicans_SC5314480228				Ca21chr2_C_albicans_SC5314480225			FALSE
Ca21chr2_C_albicans_SC5314	480228	Ca21chr2_C_albicans_SC5314	480231	Ca21chr2_C_albicans_SC5314480228	Ca21chr2_C_albicans_SC5314480231				Ca21chr2_C_albicans_SC5314480228			FALSE
Ca21chr2_C_albicans_SC5314	480231	Ca21chr2_C_albicans_SC5314	480375	Ca21chr2_C_albicans_SC5314480231	Ca21chr2_C_albicans_SC5314480375				Ca21chr2_C_albicans_SC5314480231			FALSE
Ca21chr2_C_albicans_SC5314	480375	Ca21chr2_C_albicans_SC5314	480461	Ca21chr2_C_albicans_SC5314480375	Ca21chr2_C_albicans_SC5314480461				Ca21chr2_C_albicans_SC5314480375			FALSE
Ca21chr2_C_albicans_SC5314	480461	Ca21chr2_C_albicans_SC5314	480465	Ca21chr2_C_albicans_SC5314480461	Ca21chr2_C_albicans_SC5314480465				Ca21chr2_C_albicans_SC5314480461			FALSE
Ca21chr2_C_albicans_SC5314	480465	Ca21chr2_C_albicans_SC5314	480711	Ca21chr2_C_albicans_SC5314480465	Ca21chr2_C_albicans_SC5314480711				Ca21chr2_C_albicans_SC5314480465			FALSE
Ca21chr2_C_albicans_SC5314	480711	Ca21chr2_C_albicans_SC5314	480726	Ca21chr2_C_albicans_SC5314480711	Ca21chr2_C_albicans_SC5314480726				Ca21chr2_C_albicans_SC5314480711			FALSE
Ca21chr2_C_albicans_SC5314	480726	Ca21chr2_C_albicans_SC5314	480747	Ca21chr2_C_albicans_SC5314480726	Ca21chr2_C_albicans_SC5314480747				Ca21chr2_C_albicans_SC5314480726			FALSE
Ca21chr2_C_albicans_SC5314	480747	Ca21chr2_C_albicans_SC5314	480900	Ca21chr2_C_albicans_SC5314480747	Ca21chr2_C_albicans_SC5314480900				Ca21chr2_C_albicans_SC5314480747			FALSE
Ca21chr2_C_albicans_SC5314	480900	Ca21chr2_C_albicans_SC5314	480993	Ca21chr2_C_albicans_SC5314480900	Ca21chr2_C_albicans_SC5314480993				Ca21chr2_C_albicans_SC5314480900			FALSE
Ca21chr2_C_albicans_SC5314	480993	Ca21chr2_C_albicans_SC5314	481098	Ca21chr2_C_albicans_SC5314480993	Ca21chr2_C_albicans_SC5314481098				Ca21chr2_C_albicans_SC5314480993			FALSE
Ca21chr2_C_albicans_SC5314	481098	Ca21chr2_C_albicans_SC5314	481666	Ca21chr2_C_albicans_SC5314481098	Ca21chr2_C_albicans_SC5314481666				Ca21chr2_C_albicans_SC5314481098			FALSE
Ca21chr2_C_albicans_SC5314	481666	Ca21chr2_C_albicans_SC5314	481688	Ca21chr2_C_albicans_SC5314481666	Ca21chr2_C_albicans_SC5314481688				Ca21chr2_C_albicans_SC5314481666			FALSE
Ca21chr2_C_albicans_SC5314	481688	Ca21chr2_C_albicans_SC5314	483642	Ca21chr2_C_albicans_SC5314481688	Ca21chr2_C_albicans_SC5314483642				Ca21chr2_C_albicans_SC5314481688			FALSE
Ca21chr2_C_albicans_SC5314	483642	Ca21chr2_C_albicans_SC5314	486031	Ca21chr2_C_albicans_SC5314483642	Ca21chr2_C_albicans_SC5314486031				Ca21chr2_C_albicans_SC5314483642			FALSE
Ca21chr2_C_albicans_SC5314	486031	Ca21chr2_C_albicans_SC5314	490356	Ca21chr2_C_albicans_SC5314486031	Ca21chr2_C_albicans_SC5314490356				Ca21chr2_C_albicans_SC5314486031			FALSE
Ca21chr2_C_albicans_SC5314	490356	Ca21chr2_C_albicans_SC5314	490364	Ca21chr2_C_albicans_SC5314490356	Ca21chr2_C_albicans_SC5314490364				Ca21chr2_C_albicans_SC5314490356			FALSE
Ca21chr2_C_albicans_SC5314	490364	Ca21chr2_C_albicans_SC5314	491310	Ca21chr2_C_albicans_SC5314490364	Ca21chr2_C_albicans_SC5314491310				Ca21chr2_C_albicans_SC5314490364			FALSE
Ca21chr2_C_albicans_SC5314	491310	Ca21chr2_C_albicans_SC5314	492061	Ca21chr2_C_albicans_SC5314491310	Ca21chr2_C_albicans_SC5314492061				Ca21chr2_C_albicans_SC5314491310			FALSE
Ca21chr2_C_albicans_SC5314	492061	Ca21chr2_C_albicans_SC5314	492065	Ca21chr2_C_albicans_SC5314492061	Ca21chr2_C_albicans_SC5314492065				Ca21chr2_C_albicans_SC5314492061			FALSE
Ca21chr2_C_albicans_SC5314	492065	Ca21chr2_C_albicans_SC5314	493398	Ca21chr2_C_albicans_SC5314492065	Ca21chr2_C_albicans_SC5314493398				Ca21chr2_C_albicans_SC5314492065			FALSE
Ca21chr2_C_albicans_SC5314	493398	Ca21chr2_C_albicans_SC5314	493440	Ca21chr2_C_albicans_SC5314493398	Ca21chr2_C_albicans_SC5314493440				Ca21chr2_C_albicans_SC5314493398			FALSE
Ca21chr2_C_albicans_SC5314	493440	Ca21chr2_C_albicans_SC5314	493608	Ca21chr2_C_albicans_SC5314493440	Ca21chr2_C_albicans_SC5314493608				Ca21chr2_C_albicans_SC5314493440			FALSE
Ca21chr2_C_albicans_SC5314	493608	Ca21chr2_C_albicans_SC5314	494319	Ca21chr2_C_albicans_SC5314493608	Ca21chr2_C_albicans_SC5314494319				Ca21chr2_C_albicans_SC5314493608			FALSE
Ca21chr2_C_albicans_SC5314	494319	Ca21chr2_C_albicans_SC5314	494355	Ca21chr2_C_albicans_SC5314494319	Ca21chr2_C_albicans_SC5314494355				Ca21chr2_C_albicans_SC5314494319			FALSE
Ca21chr2_C_albicans_SC5314	494355	Ca21chr2_C_albicans_SC5314	494479	Ca21chr2_C_albicans_SC5314494355	Ca21chr2_C_albicans_SC5314494479				Ca21chr2_C_albicans_SC5314494355			FALSE
Ca21chr2_C_albicans_SC5314	494479	Ca21chr2_C_albicans_SC5314	495111	Ca21chr2_C_albicans_SC5314494479	Ca21chr2_C_albicans_SC5314495111				Ca21chr2_C_albicans_SC5314494479			FALSE
Ca21chr2_C_albicans_SC5314	495111	Ca21chr2_C_albicans_SC5314	496762	Ca21chr2_C_albicans_SC5314495111	Ca21chr2_C_albicans_SC5314496762				Ca21chr2_C_albicans_SC5314495111			FALSE
Ca21chr2_C_albicans_SC5314	496762	Ca21chr2_C_albicans_SC5314	497149	Ca21chr2_C_albicans_SC5314496762	Ca21chr2_C_albicans_SC5314497149				Ca21chr2_C_albicans_SC5314496762			FALSE
Ca21chr2_C_albicans_SC5314	497149	Ca21chr2_C_albicans_SC5314	501888	Ca21chr2_C_albicans_SC5314497149	Ca21chr2_C_albicans_SC5314501888				Ca21chr2_C_albicans_SC5314497149			FALSE
Ca21chr2_C_albicans_SC5314	501888	Ca21chr2_C_albicans_SC5314	501959	Ca21chr2_C_albicans_SC5314501888	Ca21chr2_C_albicans_SC5314501959				Ca21chr2_C_albicans_SC5314501888			FALSE
Ca21chr2_C_albicans_SC5314	501959	Ca21chr2_C_albicans_SC5314	502769	Ca21chr2_C_albicans_SC5314501959	Ca21chr2_C_albicans_SC5314502769				Ca21chr2_C_albicans_SC5314501959			FALSE
Ca21chr2_C_albicans_SC5314	502769	Ca21chr2_C_albicans_SC5314	502787	Ca21chr2_C_albicans_SC5314502769	Ca21chr2_C_albicans_SC5314502787				Ca21chr2_C_albicans_SC5314502769			FALSE
Ca21chr2_C_albicans_SC5314	502787	Ca21chr2_C_albicans_SC5314	504859	Ca21chr2_C_albicans_SC5314502787	Ca21chr2_C_albicans_SC5314504859				Ca21chr2_C_albicans_SC5314502787			FALSE
Ca21chr2_C_albicans_SC5314	504859	Ca21chr2_C_albicans_SC5314	505005	Ca21chr2_C_albicans_SC5314504859	Ca21chr2_C_albicans_SC5314505005				Ca21chr2_C_albicans_SC5314504859			FALSE
Ca21chr2_C_albicans_SC5314	505005	Ca21chr2_C_albicans_SC5314	510405	Ca21chr2_C_albicans_SC5314505005	Ca21chr2_C_albicans_SC5314510405				Ca21chr2_C_albicans_SC5314505005			FALSE
Ca21chr2_C_albicans_SC5314	510405	Ca21chr2_C_albicans_SC5314	513388	Ca21chr2_C_albicans_SC5314510405	Ca21chr2_C_albicans_SC5314513388				Ca21chr2_C_albicans_SC5314510405			FALSE
Ca21chr2_C_albicans_SC5314	513388	Ca21chr2_C_albicans_SC5314	513867	Ca21chr2_C_albicans_SC5314513388	Ca21chr2_C_albicans_SC5314513867				Ca21chr2_C_albicans_SC5314513388			FALSE
Ca21chr2_C_albicans_SC5314	513522	Ca21chr2_C_albicans_SC5314	514985	Ca21chr2_C_albicans_SC5314513522	Ca21chr2_C_albicans_SC5314514985				#N/A			TRUE
Ca21chr2_C_albicans_SC5314	513867	Ca21chr2_C_albicans_SC5314	515844	Ca21chr2_C_albicans_SC5314513867	Ca21chr2_C_albicans_SC5314515844				Ca21chr2_C_albicans_SC5314513867			FALSE
Ca21chr2_C_albicans_SC5314	514985	Ca21chr2_C_albicans_SC5314	515862	Ca21chr2_C_albicans_SC5314514985	Ca21chr2_C_albicans_SC5314515862				Ca21chr2_C_albicans_SC5314514985			FALSE
Ca21chr2_C_albicans_SC5314	515844	Ca21chr2_C_albicans_SC5314	516396	Ca21chr2_C_albicans_SC5314515844	Ca21chr2_C_albicans_SC5314516396				Ca21chr2_C_albicans_SC5314515844			FALSE
Ca21chr2_C_albicans_SC5314	515862	Ca21chr2_C_albicans_SC5314	516458	Ca21chr2_C_albicans_SC5314515862	Ca21chr2_C_albicans_SC5314516458				Ca21chr2_C_albicans_SC5314515862			FALSE
Ca21chr2_C_albicans_SC5314	516396	Ca21chr2_C_albicans_SC5314	516459	Ca21chr2_C_albicans_SC5314516396	Ca21chr2_C_albicans_SC5314516459				Ca21chr2_C_albicans_SC5314516396			FALSE
Ca21chr2_C_albicans_SC5314	516458	Ca21chr2_C_albicans_SC5314	516462	Ca21chr2_C_albicans_SC5314516458	Ca21chr2_C_albicans_SC5314516462				Ca21chr2_C_albicans_SC5314516458			FALSE
Ca21chr2_C_albicans_SC5314	516459	Ca21chr2_C_albicans_SC5314	516498	Ca21chr2_C_albicans_SC5314516459	Ca21chr2_C_albicans_SC5314516498				Ca21chr2_C_albicans_SC5314516459			FALSE
Ca21chr2_C_albicans_SC5314	516462	Ca21chr2_C_albicans_SC5314	516502	Ca21chr2_C_albicans_SC5314516462	Ca21chr2_C_albicans_SC5314516502				Ca21chr2_C_albicans_SC5314516462			FALSE
Ca21chr2_C_albicans_SC5314	516498	Ca21chr2_C_albicans_SC5314	516504	Ca21chr2_C_albicans_SC5314516498	Ca21chr2_C_albicans_SC5314516504				Ca21chr2_C_albicans_SC5314516498			FALSE
Ca21chr2_C_albicans_SC5314	516502	Ca21chr2_C_albicans_SC5314	516548	Ca21chr2_C_albicans_SC5314516502	Ca21chr2_C_albicans_SC5314516548				Ca21chr2_C_albicans_SC5314516502			FALSE
Ca21chr2_C_albicans_SC5314	516504	Ca21chr2_C_albicans_SC5314	516771	Ca21chr2_C_albicans_SC5314516504	Ca21chr2_C_albicans_SC5314516771				Ca21chr2_C_albicans_SC5314516504			FALSE
Ca21chr2_C_albicans_SC5314	516548	Ca21chr2_C_albicans_SC5314	516907	Ca21chr2_C_albicans_SC5314516548	Ca21chr2_C_albicans_SC5314516907				Ca21chr2_C_albicans_SC5314516548			FALSE
Ca21chr2_C_albicans_SC5314	516771	Ca21chr2_C_albicans_SC5314	517018	Ca21chr2_C_albicans_SC5314516771	Ca21chr2_C_albicans_SC5314517018				Ca21chr2_C_albicans_SC5314516771			FALSE
Ca21chr2_C_albicans_SC5314	516907	Ca21chr2_C_albicans_SC5314	519686	Ca21chr2_C_albicans_SC5314516907	Ca21chr2_C_albicans_SC5314519686				Ca21chr2_C_albicans_SC5314516907			FALSE
Ca21chr2_C_albicans_SC5314	517018	Ca21chr2_C_albicans_SC5314	519698	Ca21chr2_C_albicans_SC5314517018	Ca21chr2_C_albicans_SC5314519698				Ca21chr2_C_albicans_SC5314517018			FALSE
Ca21chr2_C_albicans_SC5314	519686	Ca21chr2_C_albicans_SC5314	521771	Ca21chr2_C_albicans_SC5314519686	Ca21chr2_C_albicans_SC5314521771				Ca21chr2_C_albicans_SC5314519686			FALSE
Ca21chr2_C_albicans_SC5314	519698	Ca21chr2_C_albicans_SC5314	521873	Ca21chr2_C_albicans_SC5314519698	Ca21chr2_C_albicans_SC5314521873				Ca21chr2_C_albicans_SC5314519698			FALSE
Ca21chr2_C_albicans_SC5314	521771	Ca21chr2_C_albicans_SC5314	524369	Ca21chr2_C_albicans_SC5314521771	Ca21chr2_C_albicans_SC5314524369				Ca21chr2_C_albicans_SC5314521771			FALSE
Ca21chr2_C_albicans_SC5314	521873	Ca21chr2_C_albicans_SC5314	524437	Ca21chr2_C_albicans_SC5314521873	Ca21chr2_C_albicans_SC5314524437				Ca21chr2_C_albicans_SC5314521873			FALSE
Ca21chr2_C_albicans_SC5314	524369	Ca21chr2_C_albicans_SC5314	525941	Ca21chr2_C_albicans_SC5314524369	Ca21chr2_C_albicans_SC5314525941				Ca21chr2_C_albicans_SC5314524369			FALSE
Ca21chr2_C_albicans_SC5314	524437	Ca21chr2_C_albicans_SC5314	525945	Ca21chr2_C_albicans_SC5314524437	Ca21chr2_C_albicans_SC5314525945				Ca21chr2_C_albicans_SC5314524437			FALSE
Ca21chr2_C_albicans_SC5314	525941	Ca21chr2_C_albicans_SC5314	525948	Ca21chr2_C_albicans_SC5314525941	Ca21chr2_C_albicans_SC5314525948				Ca21chr2_C_albicans_SC5314525941			FALSE
Ca21chr2_C_albicans_SC5314	525945	Ca21chr2_C_albicans_SC5314	528270	Ca21chr2_C_albicans_SC5314525945	Ca21chr2_C_albicans_SC5314528270				Ca21chr2_C_albicans_SC5314525945			FALSE
Ca21chr2_C_albicans_SC5314	525948	Ca21chr2_C_albicans_SC5314	529173	Ca21chr2_C_albicans_SC5314525948	Ca21chr2_C_albicans_SC5314529173				Ca21chr2_C_albicans_SC5314525948			FALSE
Ca21chr2_C_albicans_SC5314	528270	Ca21chr2_C_albicans_SC5314	532826	Ca21chr2_C_albicans_SC5314528270	Ca21chr2_C_albicans_SC5314532826				Ca21chr2_C_albicans_SC5314528270			FALSE
Ca21chr2_C_albicans_SC5314	529173	Ca21chr2_C_albicans_SC5314	532983	Ca21chr2_C_albicans_SC5314529173	Ca21chr2_C_albicans_SC5314532983				Ca21chr2_C_albicans_SC5314529173			FALSE
Ca21chr2_C_albicans_SC5314	532826	Ca21chr2_C_albicans_SC5314	533077	Ca21chr2_C_albicans_SC5314532826	Ca21chr2_C_albicans_SC5314533077				Ca21chr2_C_albicans_SC5314532826			FALSE
Ca21chr2_C_albicans_SC5314	532983	Ca21chr2_C_albicans_SC5314	533250	Ca21chr2_C_albicans_SC5314532983	Ca21chr2_C_albicans_SC5314533250				Ca21chr2_C_albicans_SC5314532983			FALSE
Ca21chr2_C_albicans_SC5314	533077	Ca21chr2_C_albicans_SC5314	538410	Ca21chr2_C_albicans_SC5314533077	Ca21chr2_C_albicans_SC5314538410				Ca21chr2_C_albicans_SC5314533077			FALSE
Ca21chr2_C_albicans_SC5314	538410	Ca21chr2_C_albicans_SC5314	540272	Ca21chr2_C_albicans_SC5314538410	Ca21chr2_C_albicans_SC5314540272				Ca21chr2_C_albicans_SC5314538410			FALSE
Ca21chr2_C_albicans_SC5314	540272	Ca21chr2_C_albicans_SC5314	540534	Ca21chr2_C_albicans_SC5314540272	Ca21chr2_C_albicans_SC5314540534				Ca21chr2_C_albicans_SC5314540272			FALSE
Ca21chr2_C_albicans_SC5314	540534	Ca21chr2_C_albicans_SC5314	542923	Ca21chr2_C_albicans_SC5314540534	Ca21chr2_C_albicans_SC5314542923				Ca21chr2_C_albicans_SC5314540534			FALSE
Ca21chr2_C_albicans_SC5314	542923	Ca21chr2_C_albicans_SC5314	547043	Ca21chr2_C_albicans_SC5314542923	Ca21chr2_C_albicans_SC5314547043				Ca21chr2_C_albicans_SC5314542923			FALSE
Ca21chr2_C_albicans_SC5314	547043	Ca21chr2_C_albicans_SC5314	547058	Ca21chr2_C_albicans_SC5314547043	Ca21chr2_C_albicans_SC5314547058				Ca21chr2_C_albicans_SC5314547043			FALSE
Ca21chr2_C_albicans_SC5314	547058	Ca21chr2_C_albicans_SC5314	547142	Ca21chr2_C_albicans_SC5314547058	Ca21chr2_C_albicans_SC5314547142				Ca21chr2_C_albicans_SC5314547058			FALSE
Ca21chr2_C_albicans_SC5314	547142	Ca21chr2_C_albicans_SC5314	547178	Ca21chr2_C_albicans_SC5314547142	Ca21chr2_C_albicans_SC5314547178				Ca21chr2_C_albicans_SC5314547142			FALSE
Ca21chr2_C_albicans_SC5314	547178	Ca21chr2_C_albicans_SC5314	550441	Ca21chr2_C_albicans_SC5314547178	Ca21chr2_C_albicans_SC5314550441				Ca21chr2_C_albicans_SC5314547178			FALSE
Ca21chr2_C_albicans_SC5314	550441	Ca21chr2_C_albicans_SC5314	552176	Ca21chr2_C_albicans_SC5314550441	Ca21chr2_C_albicans_SC5314552176				Ca21chr2_C_albicans_SC5314550441			FALSE
Ca21chr2_C_albicans_SC5314	552176	Ca21chr2_C_albicans_SC5314	553162	Ca21chr2_C_albicans_SC5314552176	Ca21chr2_C_albicans_SC5314553162				Ca21chr2_C_albicans_SC5314552176			FALSE
Ca21chr2_C_albicans_SC5314	553162	Ca21chr2_C_albicans_SC5314	555783	Ca21chr2_C_albicans_SC5314553162	Ca21chr2_C_albicans_SC5314555783				Ca21chr2_C_albicans_SC5314553162			FALSE
Ca21chr2_C_albicans_SC5314	555783	Ca21chr2_C_albicans_SC5314	556460	Ca21chr2_C_albicans_SC5314555783	Ca21chr2_C_albicans_SC5314556460				Ca21chr2_C_albicans_SC5314555783			FALSE
Ca21chr2_C_albicans_SC5314	556460	Ca21chr2_C_albicans_SC5314	557518	Ca21chr2_C_albicans_SC5314556460	Ca21chr2_C_albicans_SC5314557518				Ca21chr2_C_albicans_SC5314556460			FALSE
Ca21chr2_C_albicans_SC5314	557518	Ca21chr2_C_albicans_SC5314	557748	Ca21chr2_C_albicans_SC5314557518	Ca21chr2_C_albicans_SC5314557748				Ca21chr2_C_albicans_SC5314557518			FALSE
Ca21chr2_C_albicans_SC5314	557748	Ca21chr2_C_albicans_SC5314	557751	Ca21chr2_C_albicans_SC5314557748	Ca21chr2_C_albicans_SC5314557751				Ca21chr2_C_albicans_SC5314557748			FALSE
Ca21chr2_C_albicans_SC5314	557751	Ca21chr2_C_albicans_SC5314	557757	Ca21chr2_C_albicans_SC5314557751	Ca21chr2_C_albicans_SC5314557757				Ca21chr2_C_albicans_SC5314557751			FALSE
Ca21chr2_C_albicans_SC5314	557757	Ca21chr2_C_albicans_SC5314	557760	Ca21chr2_C_albicans_SC5314557757	Ca21chr2_C_albicans_SC5314557760				Ca21chr2_C_albicans_SC5314557757			FALSE
Ca21chr2_C_albicans_SC5314	557760	Ca21chr2_C_albicans_SC5314	557762	Ca21chr2_C_albicans_SC5314557760	Ca21chr2_C_albicans_SC5314557762				Ca21chr2_C_albicans_SC5314557760			FALSE
Ca21chr2_C_albicans_SC5314	557762	Ca21chr2_C_albicans_SC5314	557769	Ca21chr2_C_albicans_SC5314557762	Ca21chr2_C_albicans_SC5314557769				Ca21chr2_C_albicans_SC5314557762			FALSE
Ca21chr2_C_albicans_SC5314	557769	Ca21chr2_C_albicans_SC5314	557771	Ca21chr2_C_albicans_SC5314557769	Ca21chr2_C_albicans_SC5314557771				Ca21chr2_C_albicans_SC5314557769			FALSE
Ca21chr2_C_albicans_SC5314	557771	Ca21chr2_C_albicans_SC5314	557805	Ca21chr2_C_albicans_SC5314557771	Ca21chr2_C_albicans_SC5314557805				Ca21chr2_C_albicans_SC5314557771			FALSE
Ca21chr2_C_albicans_SC5314	557805	Ca21chr2_C_albicans_SC5314	557817	Ca21chr2_C_albicans_SC5314557805	Ca21chr2_C_albicans_SC5314557817				Ca21chr2_C_albicans_SC5314557805			FALSE
Ca21chr2_C_albicans_SC5314	557817	Ca21chr2_C_albicans_SC5314	557823	Ca21chr2_C_albicans_SC5314557817	Ca21chr2_C_albicans_SC5314557823				Ca21chr2_C_albicans_SC5314557817			FALSE
Ca21chr2_C_albicans_SC5314	557823	Ca21chr2_C_albicans_SC5314	557828	Ca21chr2_C_albicans_SC5314557823	Ca21chr2_C_albicans_SC5314557828				Ca21chr2_C_albicans_SC5314557823			FALSE
Ca21chr2_C_albicans_SC5314	557828	Ca21chr2_C_albicans_SC5314	557832	Ca21chr2_C_albicans_SC5314557828	Ca21chr2_C_albicans_SC5314557832				Ca21chr2_C_albicans_SC5314557828			FALSE
Ca21chr2_C_albicans_SC5314	557832	Ca21chr2_C_albicans_SC5314	557834	Ca21chr2_C_albicans_SC5314557832	Ca21chr2_C_albicans_SC5314557834				Ca21chr2_C_albicans_SC5314557832			FALSE
Ca21chr2_C_albicans_SC5314	557834	Ca21chr2_C_albicans_SC5314	557838	Ca21chr2_C_albicans_SC5314557834	Ca21chr2_C_albicans_SC5314557838				Ca21chr2_C_albicans_SC5314557834			FALSE
Ca21chr2_C_albicans_SC5314	557838	Ca21chr2_C_albicans_SC5314	557841	Ca21chr2_C_albicans_SC5314557838	Ca21chr2_C_albicans_SC5314557841				Ca21chr2_C_albicans_SC5314557838			FALSE
Ca21chr2_C_albicans_SC5314	557841	Ca21chr2_C_albicans_SC5314	557907	Ca21chr2_C_albicans_SC5314557841	Ca21chr2_C_albicans_SC5314557907				Ca21chr2_C_albicans_SC5314557841			FALSE
Ca21chr2_C_albicans_SC5314	557907	Ca21chr2_C_albicans_SC5314	557910	Ca21chr2_C_albicans_SC5314557907	Ca21chr2_C_albicans_SC5314557910				Ca21chr2_C_albicans_SC5314557907			FALSE
Ca21chr2_C_albicans_SC5314	557910	Ca21chr2_C_albicans_SC5314	557913	Ca21chr2_C_albicans_SC5314557910	Ca21chr2_C_albicans_SC5314557913				Ca21chr2_C_albicans_SC5314557910			FALSE
Ca21chr2_C_albicans_SC5314	557913	Ca21chr2_C_albicans_SC5314	557916	Ca21chr2_C_albicans_SC5314557913	Ca21chr2_C_albicans_SC5314557916				Ca21chr2_C_albicans_SC5314557913			FALSE
Ca21chr2_C_albicans_SC5314	557916	Ca21chr2_C_albicans_SC5314	557922	Ca21chr2_C_albicans_SC5314557916	Ca21chr2_C_albicans_SC5314557922				Ca21chr2_C_albicans_SC5314557916			FALSE
Ca21chr2_C_albicans_SC5314	557922	Ca21chr2_C_albicans_SC5314	557924	Ca21chr2_C_albicans_SC5314557922	Ca21chr2_C_albicans_SC5314557924				Ca21chr2_C_albicans_SC5314557922			FALSE
Ca21chr2_C_albicans_SC5314	557924	Ca21chr2_C_albicans_SC5314	557925	Ca21chr2_C_albicans_SC5314557924	Ca21chr2_C_albicans_SC5314557925				Ca21chr2_C_albicans_SC5314557924			FALSE
Ca21chr2_C_albicans_SC5314	557925	Ca21chr2_C_albicans_SC5314	557928	Ca21chr2_C_albicans_SC5314557925	Ca21chr2_C_albicans_SC5314557928				Ca21chr2_C_albicans_SC5314557925			FALSE
Ca21chr2_C_albicans_SC5314	557928	Ca21chr2_C_albicans_SC5314	557937	Ca21chr2_C_albicans_SC5314557928	Ca21chr2_C_albicans_SC5314557937				Ca21chr2_C_albicans_SC5314557928			FALSE
Ca21chr2_C_albicans_SC5314	557937	Ca21chr2_C_albicans_SC5314	557943	Ca21chr2_C_albicans_SC5314557937	Ca21chr2_C_albicans_SC5314557943				Ca21chr2_C_albicans_SC5314557937			FALSE
Ca21chr2_C_albicans_SC5314	557943	Ca21chr2_C_albicans_SC5314	557946	Ca21chr2_C_albicans_SC5314557943	Ca21chr2_C_albicans_SC5314557946				Ca21chr2_C_albicans_SC5314557943			FALSE
Ca21chr2_C_albicans_SC5314	557946	Ca21chr2_C_albicans_SC5314	557948	Ca21chr2_C_albicans_SC5314557946	Ca21chr2_C_albicans_SC5314557948				Ca21chr2_C_albicans_SC5314557946			FALSE
Ca21chr2_C_albicans_SC5314	557948	Ca21chr2_C_albicans_SC5314	558101	Ca21chr2_C_albicans_SC5314557948	Ca21chr2_C_albicans_SC5314558101				Ca21chr2_C_albicans_SC5314557948			FALSE
Ca21chr2_C_albicans_SC5314	557958	Ca21chr2_C_albicans_SC5314	558149	Ca21chr2_C_albicans_SC5314557958	Ca21chr2_C_albicans_SC5314558149				#N/A			TRUE
Ca21chr2_C_albicans_SC5314	557960	Ca21chr2_C_albicans_SC5314	558150	Ca21chr2_C_albicans_SC5314557960	Ca21chr2_C_albicans_SC5314558150				#N/A			TRUE
Ca21chr2_C_albicans_SC5314	557961	Ca21chr2_C_albicans_SC5314	558165	Ca21chr2_C_albicans_SC5314557961	Ca21chr2_C_albicans_SC5314558165				#N/A			TRUE
Ca21chr2_C_albicans_SC5314	557970	Ca21chr2_C_albicans_SC5314	558177	Ca21chr2_C_albicans_SC5314557970	Ca21chr2_C_albicans_SC5314558177				#N/A			TRUE
Ca21chr2_C_albicans_SC5314	557971	Ca21chr2_C_albicans_SC5314	558186	Ca21chr2_C_albicans_SC5314557971	Ca21chr2_C_albicans_SC5314558186				#N/A			TRUE
Ca21chr2_C_albicans_SC5314	557979	Ca21chr2_C_albicans_SC5314	558192	Ca21chr2_C_albicans_SC5314557979	Ca21chr2_C_albicans_SC5314558192				#N/A			TRUE
Ca21chr2_C_albicans_SC5314	557982	Ca21chr2_C_albicans_SC5314	558193	Ca21chr2_C_albicans_SC5314557982	Ca21chr2_C_albicans_SC5314558193				#N/A			TRUE
Ca21chr2_C_albicans_SC5314	558101	Ca21chr2_C_albicans_SC5314	558195	Ca21chr2_C_albicans_SC5314558101	Ca21chr2_C_albicans_SC5314558195				Ca21chr2_C_albicans_SC5314558101			FALSE
Ca21chr2_C_albicans_SC5314	558149	Ca21chr2_C_albicans_SC5314	558228	Ca21chr2_C_albicans_SC5314558149	Ca21chr2_C_albicans_SC5314558228				Ca21chr2_C_albicans_SC5314558149			FALSE
Ca21chr2_C_albicans_SC5314	558150	Ca21chr2_C_albicans_SC5314	558255	Ca21chr2_C_albicans_SC5314558150	Ca21chr2_C_albicans_SC5314558255				Ca21chr2_C_albicans_SC5314558150			FALSE
Ca21chr2_C_albicans_SC5314	558165	Ca21chr2_C_albicans_SC5314	563910	Ca21chr2_C_albicans_SC5314558165	Ca21chr2_C_albicans_SC5314563910				Ca21chr2_C_albicans_SC5314558165			FALSE
Ca21chr2_C_albicans_SC5314	558177	Ca21chr2_C_albicans_SC5314	565304	Ca21chr2_C_albicans_SC5314558177	Ca21chr2_C_albicans_SC5314565304				Ca21chr2_C_albicans_SC5314558177			FALSE
Ca21chr2_C_albicans_SC5314	558186	Ca21chr2_C_albicans_SC5314	565518	Ca21chr2_C_albicans_SC5314558186	Ca21chr2_C_albicans_SC5314565518				Ca21chr2_C_albicans_SC5314558186			FALSE
Ca21chr2_C_albicans_SC5314	558192	Ca21chr2_C_albicans_SC5314	565570	Ca21chr2_C_albicans_SC5314558192	Ca21chr2_C_albicans_SC5314565570				Ca21chr2_C_albicans_SC5314558192			FALSE
Ca21chr2_C_albicans_SC5314	558193	Ca21chr2_C_albicans_SC5314	566065	Ca21chr2_C_albicans_SC5314558193	Ca21chr2_C_albicans_SC5314566065				Ca21chr2_C_albicans_SC5314558193			FALSE
Ca21chr2_C_albicans_SC5314	558195	Ca21chr2_C_albicans_SC5314	567255	Ca21chr2_C_albicans_SC5314558195	Ca21chr2_C_albicans_SC5314567255				Ca21chr2_C_albicans_SC5314558195			FALSE
Ca21chr2_C_albicans_SC5314	558228	Ca21chr2_C_albicans_SC5314	567663	Ca21chr2_C_albicans_SC5314558228	Ca21chr2_C_albicans_SC5314567663				Ca21chr2_C_albicans_SC5314558228			FALSE
Ca21chr2_C_albicans_SC5314	558255	Ca21chr2_C_albicans_SC5314	570284	Ca21chr2_C_albicans_SC5314558255	Ca21chr2_C_albicans_SC5314570284				Ca21chr2_C_albicans_SC5314558255			FALSE
Ca21chr2_C_albicans_SC5314	563910	Ca21chr2_C_albicans_SC5314	570952	Ca21chr2_C_albicans_SC5314563910	Ca21chr2_C_albicans_SC5314570952				Ca21chr2_C_albicans_SC5314563910			FALSE
Ca21chr2_C_albicans_SC5314	565304	Ca21chr2_C_albicans_SC5314	571178	Ca21chr2_C_albicans_SC5314565304	Ca21chr2_C_albicans_SC5314571178				Ca21chr2_C_albicans_SC5314565304			FALSE
Ca21chr2_C_albicans_SC5314	565518	Ca21chr2_C_albicans_SC5314	571199	Ca21chr2_C_albicans_SC5314565518	Ca21chr2_C_albicans_SC5314571199				Ca21chr2_C_albicans_SC5314565518			FALSE
Ca21chr2_C_albicans_SC5314	565570	Ca21chr2_C_albicans_SC5314	571211	Ca21chr2_C_albicans_SC5314565570	Ca21chr2_C_albicans_SC5314571211				Ca21chr2_C_albicans_SC5314565570			FALSE
Ca21chr2_C_albicans_SC5314	566065	Ca21chr2_C_albicans_SC5314	571215	Ca21chr2_C_albicans_SC5314566065	Ca21chr2_C_albicans_SC5314571215				Ca21chr2_C_albicans_SC5314566065			FALSE
Ca21chr2_C_albicans_SC5314	567255	Ca21chr2_C_albicans_SC5314	571217	Ca21chr2_C_albicans_SC5314567255	Ca21chr2_C_albicans_SC5314571217				Ca21chr2_C_albicans_SC5314567255			FALSE
Ca21chr2_C_albicans_SC5314	567663	Ca21chr2_C_albicans_SC5314	571220	Ca21chr2_C_albicans_SC5314567663	Ca21chr2_C_albicans_SC5314571220				Ca21chr2_C_albicans_SC5314567663			FALSE
Ca21chr2_C_albicans_SC5314	570952	Ca21chr2_C_albicans_SC5314	571224	Ca21chr2_C_albicans_SC5314570952	Ca21chr2_C_albicans_SC5314571224				Ca21chr2_C_albicans_SC5314570952			FALSE
Ca21chr2_C_albicans_SC5314	571178	Ca21chr2_C_albicans_SC5314	571225	Ca21chr2_C_albicans_SC5314571178	Ca21chr2_C_albicans_SC5314571225				Ca21chr2_C_albicans_SC5314571178			FALSE
Ca21chr2_C_albicans_SC5314	571199	Ca21chr2_C_albicans_SC5314	571226	Ca21chr2_C_albicans_SC5314571199	Ca21chr2_C_albicans_SC5314571226				Ca21chr2_C_albicans_SC5314571199			FALSE
Ca21chr2_C_albicans_SC5314	571211	Ca21chr2_C_albicans_SC5314	571232	Ca21chr2_C_albicans_SC5314571211	Ca21chr2_C_albicans_SC5314571232				Ca21chr2_C_albicans_SC5314571211			FALSE
Ca21chr2_C_albicans_SC5314	571215	Ca21chr2_C_albicans_SC5314	571235	Ca21chr2_C_albicans_SC5314571215	Ca21chr2_C_albicans_SC5314571235				Ca21chr2_C_albicans_SC5314571215			FALSE
Ca21chr2_C_albicans_SC5314	571217	Ca21chr2_C_albicans_SC5314	571236	Ca21chr2_C_albicans_SC5314571217	Ca21chr2_C_albicans_SC5314571236				Ca21chr2_C_albicans_SC5314571217			FALSE
Ca21chr2_C_albicans_SC5314	571220	Ca21chr2_C_albicans_SC5314	571238	Ca21chr2_C_albicans_SC5314571220	Ca21chr2_C_albicans_SC5314571238				Ca21chr2_C_albicans_SC5314571220			FALSE
Ca21chr2_C_albicans_SC5314	571224	Ca21chr2_C_albicans_SC5314	571241	Ca21chr2_C_albicans_SC5314571224	Ca21chr2_C_albicans_SC5314571241				Ca21chr2_C_albicans_SC5314571224			FALSE
Ca21chr2_C_albicans_SC5314	571225	Ca21chr2_C_albicans_SC5314	571256	Ca21chr2_C_albicans_SC5314571225	Ca21chr2_C_albicans_SC5314571256				Ca21chr2_C_albicans_SC5314571225			FALSE
Ca21chr2_C_albicans_SC5314	571226	Ca21chr2_C_albicans_SC5314	571262	Ca21chr2_C_albicans_SC5314571226	Ca21chr2_C_albicans_SC5314571262				Ca21chr2_C_albicans_SC5314571226			FALSE
Ca21chr2_C_albicans_SC5314	571232	Ca21chr2_C_albicans_SC5314	571277	Ca21chr2_C_albicans_SC5314571232	Ca21chr2_C_albicans_SC5314571277				Ca21chr2_C_albicans_SC5314571232			FALSE
Ca21chr2_C_albicans_SC5314	571235	Ca21chr2_C_albicans_SC5314	571280	Ca21chr2_C_albicans_SC5314571235	Ca21chr2_C_albicans_SC5314571280				Ca21chr2_C_albicans_SC5314571235			FALSE
Ca21chr2_C_albicans_SC5314	571236	Ca21chr2_C_albicans_SC5314	571298	Ca21chr2_C_albicans_SC5314571236	Ca21chr2_C_albicans_SC5314571298				Ca21chr2_C_albicans_SC5314571236			FALSE
Ca21chr2_C_albicans_SC5314	571238	Ca21chr2_C_albicans_SC5314	573342	Ca21chr2_C_albicans_SC5314571238	Ca21chr2_C_albicans_SC5314573342				Ca21chr2_C_albicans_SC5314571238			FALSE
Ca21chr2_C_albicans_SC5314	571241	Ca21chr2_C_albicans_SC5314	574509	Ca21chr2_C_albicans_SC5314571241	Ca21chr2_C_albicans_SC5314574509				Ca21chr2_C_albicans_SC5314571241			FALSE
Ca21chr2_C_albicans_SC5314	571256	Ca21chr2_C_albicans_SC5314	574649	Ca21chr2_C_albicans_SC5314571256	Ca21chr2_C_albicans_SC5314574649				Ca21chr2_C_albicans_SC5314571256			FALSE
Ca21chr2_C_albicans_SC5314	571262	Ca21chr2_C_albicans_SC5314	574798	Ca21chr2_C_albicans_SC5314571262	Ca21chr2_C_albicans_SC5314574798				Ca21chr2_C_albicans_SC5314571262			FALSE
Ca21chr2_C_albicans_SC5314	571277	Ca21chr2_C_albicans_SC5314	574897	Ca21chr2_C_albicans_SC5314571277	Ca21chr2_C_albicans_SC5314574897				Ca21chr2_C_albicans_SC5314571277			FALSE
Ca21chr2_C_albicans_SC5314	571280	Ca21chr2_C_albicans_SC5314	585228	Ca21chr2_C_albicans_SC5314571280	Ca21chr2_C_albicans_SC5314585228				Ca21chr2_C_albicans_SC5314571280			FALSE
Ca21chr2_C_albicans_SC5314	571298	Ca21chr2_C_albicans_SC5314	588652	Ca21chr2_C_albicans_SC5314571298	Ca21chr2_C_albicans_SC5314588652				Ca21chr2_C_albicans_SC5314571298			FALSE
Ca21chr2_C_albicans_SC5314	573342	Ca21chr2_C_albicans_SC5314	588746	Ca21chr2_C_albicans_SC5314573342	Ca21chr2_C_albicans_SC5314588746				Ca21chr2_C_albicans_SC5314573342			FALSE
Ca21chr2_C_albicans_SC5314	574509	Ca21chr2_C_albicans_SC5314	588887	Ca21chr2_C_albicans_SC5314574509	Ca21chr2_C_albicans_SC5314588887				Ca21chr2_C_albicans_SC5314574509			FALSE
Ca21chr2_C_albicans_SC5314	574649	Ca21chr2_C_albicans_SC5314	588903	Ca21chr2_C_albicans_SC5314574649	Ca21chr2_C_albicans_SC5314588903				Ca21chr2_C_albicans_SC5314574649			FALSE
Ca21chr2_C_albicans_SC5314	574798	Ca21chr2_C_albicans_SC5314	589169	Ca21chr2_C_albicans_SC5314574798	Ca21chr2_C_albicans_SC5314589169				Ca21chr2_C_albicans_SC5314574798			FALSE
Ca21chr2_C_albicans_SC5314	574897	Ca21chr2_C_albicans_SC5314	589262	Ca21chr2_C_albicans_SC5314574897	Ca21chr2_C_albicans_SC5314589262				Ca21chr2_C_albicans_SC5314574897			FALSE
Ca21chr2_C_albicans_SC5314	585228	Ca21chr2_C_albicans_SC5314	589325	Ca21chr2_C_albicans_SC5314585228	Ca21chr2_C_albicans_SC5314589325				Ca21chr2_C_albicans_SC5314585228			FALSE
Ca21chr2_C_albicans_SC5314	586231	Ca21chr2_C_albicans_SC5314	589486	Ca21chr2_C_albicans_SC5314586231	Ca21chr2_C_albicans_SC5314589486				#N/A			TRUE
Ca21chr2_C_albicans_SC5314	586370	Ca21chr2_C_albicans_SC5314	589562	Ca21chr2_C_albicans_SC5314586370	Ca21chr2_C_albicans_SC5314589562				#N/A			TRUE
Ca21chr2_C_albicans_SC5314	588652	Ca21chr2_C_albicans_SC5314	589589	Ca21chr2_C_albicans_SC5314588652	Ca21chr2_C_albicans_SC5314589589				Ca21chr2_C_albicans_SC5314588652			FALSE
Ca21chr2_C_albicans_SC5314	588746	Ca21chr2_C_albicans_SC5314	590400	Ca21chr2_C_albicans_SC5314588746	Ca21chr2_C_albicans_SC5314590400				Ca21chr2_C_albicans_SC5314588746			FALSE
Ca21chr2_C_albicans_SC5314	588887	Ca21chr2_C_albicans_SC5314	591686	Ca21chr2_C_albicans_SC5314588887	Ca21chr2_C_albicans_SC5314591686				Ca21chr2_C_albicans_SC5314588887			FALSE
Ca21chr2_C_albicans_SC5314	588903	Ca21chr2_C_albicans_SC5314	592016	Ca21chr2_C_albicans_SC5314588903	Ca21chr2_C_albicans_SC5314592016				Ca21chr2_C_albicans_SC5314588903			FALSE
Ca21chr2_C_albicans_SC5314	589169	Ca21chr2_C_albicans_SC5314	592130	Ca21chr2_C_albicans_SC5314589169	Ca21chr2_C_albicans_SC5314592130				Ca21chr2_C_albicans_SC5314589169			FALSE
Ca21chr2_C_albicans_SC5314	589262	Ca21chr2_C_albicans_SC5314	592785	Ca21chr2_C_albicans_SC5314589262	Ca21chr2_C_albicans_SC5314592785				Ca21chr2_C_albicans_SC5314589262			FALSE
Ca21chr2_C_albicans_SC5314	589325	Ca21chr2_C_albicans_SC5314	595658	Ca21chr2_C_albicans_SC5314589325	Ca21chr2_C_albicans_SC5314595658				Ca21chr2_C_albicans_SC5314589325			FALSE
Ca21chr2_C_albicans_SC5314	589486	Ca21chr2_C_albicans_SC5314	596276	Ca21chr2_C_albicans_SC5314589486	Ca21chr2_C_albicans_SC5314596276				Ca21chr2_C_albicans_SC5314589486			FALSE
Ca21chr2_C_albicans_SC5314	589562	Ca21chr2_C_albicans_SC5314	596886	Ca21chr2_C_albicans_SC5314589562	Ca21chr2_C_albicans_SC5314596886				Ca21chr2_C_albicans_SC5314589562			FALSE
Ca21chr2_C_albicans_SC5314	589589	Ca21chr2_C_albicans_SC5314	596945	Ca21chr2_C_albicans_SC5314589589	Ca21chr2_C_albicans_SC5314596945				Ca21chr2_C_albicans_SC5314589589			FALSE
Ca21chr2_C_albicans_SC5314	590400	Ca21chr2_C_albicans_SC5314	601009	Ca21chr2_C_albicans_SC5314590400	Ca21chr2_C_albicans_SC5314601009				Ca21chr2_C_albicans_SC5314590400			FALSE
Ca21chr2_C_albicans_SC5314	591686	Ca21chr2_C_albicans_SC5314	601175	Ca21chr2_C_albicans_SC5314591686	Ca21chr2_C_albicans_SC5314601175				Ca21chr2_C_albicans_SC5314591686			FALSE
Ca21chr2_C_albicans_SC5314	592016	Ca21chr2_C_albicans_SC5314	601294	Ca21chr2_C_albicans_SC5314592016	Ca21chr2_C_albicans_SC5314601294				Ca21chr2_C_albicans_SC5314592016			FALSE
Ca21chr2_C_albicans_SC5314	592130	Ca21chr2_C_albicans_SC5314	602187	Ca21chr2_C_albicans_SC5314592130	Ca21chr2_C_albicans_SC5314602187				Ca21chr2_C_albicans_SC5314592130			FALSE
Ca21chr2_C_albicans_SC5314	592785	Ca21chr2_C_albicans_SC5314	602676	Ca21chr2_C_albicans_SC5314592785	Ca21chr2_C_albicans_SC5314602676				Ca21chr2_C_albicans_SC5314592785			FALSE
Ca21chr2_C_albicans_SC5314	595658	Ca21chr2_C_albicans_SC5314	604230	Ca21chr2_C_albicans_SC5314595658	Ca21chr2_C_albicans_SC5314604230				Ca21chr2_C_albicans_SC5314595658			FALSE
Ca21chr2_C_albicans_SC5314	596276	Ca21chr2_C_albicans_SC5314	604320	Ca21chr2_C_albicans_SC5314596276	Ca21chr2_C_albicans_SC5314604320				Ca21chr2_C_albicans_SC5314596276			FALSE
Ca21chr2_C_albicans_SC5314	596886	Ca21chr2_C_albicans_SC5314	604326	Ca21chr2_C_albicans_SC5314596886	Ca21chr2_C_albicans_SC5314604326				Ca21chr2_C_albicans_SC5314596886			FALSE
Ca21chr2_C_albicans_SC5314	596945	Ca21chr2_C_albicans_SC5314	607697	Ca21chr2_C_albicans_SC5314596945	Ca21chr2_C_albicans_SC5314607697				Ca21chr2_C_albicans_SC5314596945			FALSE
Ca21chr2_C_albicans_SC5314	601009	Ca21chr2_C_albicans_SC5314	612447	Ca21chr2_C_albicans_SC5314601009	Ca21chr2_C_albicans_SC5314612447				Ca21chr2_C_albicans_SC5314601009			FALSE
Ca21chr2_C_albicans_SC5314	601175	Ca21chr2_C_albicans_SC5314	612656	Ca21chr2_C_albicans_SC5314601175	Ca21chr2_C_albicans_SC5314612656				Ca21chr2_C_albicans_SC5314601175			FALSE
Ca21chr2_C_albicans_SC5314	601294	Ca21chr2_C_albicans_SC5314	612722	Ca21chr2_C_albicans_SC5314601294	Ca21chr2_C_albicans_SC5314612722				Ca21chr2_C_albicans_SC5314601294			FALSE
Ca21chr2_C_albicans_SC5314	602187	Ca21chr2_C_albicans_SC5314	613437	Ca21chr2_C_albicans_SC5314602187	Ca21chr2_C_albicans_SC5314613437				Ca21chr2_C_albicans_SC5314602187			FALSE
Ca21chr2_C_albicans_SC5314	602676	Ca21chr2_C_albicans_SC5314	613490	Ca21chr2_C_albicans_SC5314602676	Ca21chr2_C_albicans_SC5314613490				Ca21chr2_C_albicans_SC5314602676			FALSE
Ca21chr2_C_albicans_SC5314	604230	Ca21chr2_C_albicans_SC5314	614203	Ca21chr2_C_albicans_SC5314604230	Ca21chr2_C_albicans_SC5314614203				Ca21chr2_C_albicans_SC5314604230			FALSE
Ca21chr2_C_albicans_SC5314	604320	Ca21chr2_C_albicans_SC5314	614254	Ca21chr2_C_albicans_SC5314604320	Ca21chr2_C_albicans_SC5314614254				Ca21chr2_C_albicans_SC5314604320			FALSE
Ca21chr2_C_albicans_SC5314	604326	Ca21chr2_C_albicans_SC5314	614320	Ca21chr2_C_albicans_SC5314604326	Ca21chr2_C_albicans_SC5314614320				Ca21chr2_C_albicans_SC5314604326			FALSE
Ca21chr2_C_albicans_SC5314	607697	Ca21chr2_C_albicans_SC5314	614410	Ca21chr2_C_albicans_SC5314607697	Ca21chr2_C_albicans_SC5314614410				Ca21chr2_C_albicans_SC5314607697			FALSE
Ca21chr2_C_albicans_SC5314	612447	Ca21chr2_C_albicans_SC5314	614467	Ca21chr2_C_albicans_SC5314612447	Ca21chr2_C_albicans_SC5314614467				Ca21chr2_C_albicans_SC5314612447			FALSE
Ca21chr2_C_albicans_SC5314	612656	Ca21chr2_C_albicans_SC5314	614473	Ca21chr2_C_albicans_SC5314612656	Ca21chr2_C_albicans_SC5314614473				Ca21chr2_C_albicans_SC5314612656			FALSE
Ca21chr2_C_albicans_SC5314	612722	Ca21chr2_C_albicans_SC5314	615433	Ca21chr2_C_albicans_SC5314612722	Ca21chr2_C_albicans_SC5314615433				Ca21chr2_C_albicans_SC5314612722			FALSE
Ca21chr2_C_albicans_SC5314	613437	Ca21chr2_C_albicans_SC5314	616435	Ca21chr2_C_albicans_SC5314613437	Ca21chr2_C_albicans_SC5314616435				Ca21chr2_C_albicans_SC5314613437			FALSE
Ca21chr2_C_albicans_SC5314	613490	Ca21chr2_C_albicans_SC5314	617180	Ca21chr2_C_albicans_SC5314613490	Ca21chr2_C_albicans_SC5314617180				Ca21chr2_C_albicans_SC5314613490			FALSE
Ca21chr2_C_albicans_SC5314	614254	Ca21chr2_C_albicans_SC5314	617699	Ca21chr2_C_albicans_SC5314614254	Ca21chr2_C_albicans_SC5314617699				Ca21chr2_C_albicans_SC5314614254			FALSE
Ca21chr2_C_albicans_SC5314	614320	Ca21chr2_C_albicans_SC5314	619029	Ca21chr2_C_albicans_SC5314614320	Ca21chr2_C_albicans_SC5314619029				Ca21chr2_C_albicans_SC5314614320			FALSE
Ca21chr2_C_albicans_SC5314	614410	Ca21chr2_C_albicans_SC5314	621585	Ca21chr2_C_albicans_SC5314614410	Ca21chr2_C_albicans_SC5314621585				Ca21chr2_C_albicans_SC5314614410			FALSE
Ca21chr2_C_albicans_SC5314	615433	Ca21chr2_C_albicans_SC5314	621645	Ca21chr2_C_albicans_SC5314615433	Ca21chr2_C_albicans_SC5314621645				Ca21chr2_C_albicans_SC5314615433			FALSE
Ca21chr2_C_albicans_SC5314	616435	Ca21chr2_C_albicans_SC5314	621987	Ca21chr2_C_albicans_SC5314616435	Ca21chr2_C_albicans_SC5314621987				Ca21chr2_C_albicans_SC5314616435			FALSE
Ca21chr2_C_albicans_SC5314	617180	Ca21chr2_C_albicans_SC5314	622290	Ca21chr2_C_albicans_SC5314617180	Ca21chr2_C_albicans_SC5314622290				Ca21chr2_C_albicans_SC5314617180			FALSE
Ca21chr2_C_albicans_SC5314	617699	Ca21chr2_C_albicans_SC5314	622742	Ca21chr2_C_albicans_SC5314617699	Ca21chr2_C_albicans_SC5314622742				Ca21chr2_C_albicans_SC5314617699			FALSE
Ca21chr2_C_albicans_SC5314	619029	Ca21chr2_C_albicans_SC5314	622857	Ca21chr2_C_albicans_SC5314619029	Ca21chr2_C_albicans_SC5314622857				Ca21chr2_C_albicans_SC5314619029			FALSE
Ca21chr2_C_albicans_SC5314	621585	Ca21chr2_C_albicans_SC5314	623625	Ca21chr2_C_albicans_SC5314621585	Ca21chr2_C_albicans_SC5314623625				Ca21chr2_C_albicans_SC5314621585			FALSE
Ca21chr2_C_albicans_SC5314	621645	Ca21chr2_C_albicans_SC5314	623662	Ca21chr2_C_albicans_SC5314621645	Ca21chr2_C_albicans_SC5314623662				Ca21chr2_C_albicans_SC5314621645			FALSE
Ca21chr2_C_albicans_SC5314	621987	Ca21chr2_C_albicans_SC5314	624001	Ca21chr2_C_albicans_SC5314621987	Ca21chr2_C_albicans_SC5314624001				Ca21chr2_C_albicans_SC5314621987			FALSE
Ca21chr2_C_albicans_SC5314	622290	Ca21chr2_C_albicans_SC5314	624202	Ca21chr2_C_albicans_SC5314622290	Ca21chr2_C_albicans_SC5314624202				Ca21chr2_C_albicans_SC5314622290			FALSE
Ca21chr2_C_albicans_SC5314	622742	Ca21chr2_C_albicans_SC5314	628859	Ca21chr2_C_albicans_SC5314622742	Ca21chr2_C_albicans_SC5314628859				Ca21chr2_C_albicans_SC5314622742			FALSE
Ca21chr2_C_albicans_SC5314	622857	Ca21chr2_C_albicans_SC5314	632242	Ca21chr2_C_albicans_SC5314622857	Ca21chr2_C_albicans_SC5314632242				Ca21chr2_C_albicans_SC5314622857			FALSE
Ca21chr2_C_albicans_SC5314	623625	Ca21chr2_C_albicans_SC5314	633410	Ca21chr2_C_albicans_SC5314623625	Ca21chr2_C_albicans_SC5314633410				Ca21chr2_C_albicans_SC5314623625			FALSE
Ca21chr2_C_albicans_SC5314	623662	Ca21chr2_C_albicans_SC5314	633571	Ca21chr2_C_albicans_SC5314623662	Ca21chr2_C_albicans_SC5314633571				Ca21chr2_C_albicans_SC5314623662			FALSE
Ca21chr2_C_albicans_SC5314	624001	Ca21chr2_C_albicans_SC5314	634570	Ca21chr2_C_albicans_SC5314624001	Ca21chr2_C_albicans_SC5314634570				Ca21chr2_C_albicans_SC5314624001			FALSE
Ca21chr2_C_albicans_SC5314	624202	Ca21chr2_C_albicans_SC5314	635775	Ca21chr2_C_albicans_SC5314624202	Ca21chr2_C_albicans_SC5314635775				Ca21chr2_C_albicans_SC5314624202			FALSE
Ca21chr2_C_albicans_SC5314	628859	Ca21chr2_C_albicans_SC5314	636716	Ca21chr2_C_albicans_SC5314628859	Ca21chr2_C_albicans_SC5314636716				Ca21chr2_C_albicans_SC5314628859			FALSE
Ca21chr2_C_albicans_SC5314	632242	Ca21chr2_C_albicans_SC5314	636860	Ca21chr2_C_albicans_SC5314632242	Ca21chr2_C_albicans_SC5314636860				Ca21chr2_C_albicans_SC5314632242			FALSE
Ca21chr2_C_albicans_SC5314	633410	Ca21chr2_C_albicans_SC5314	636935	Ca21chr2_C_albicans_SC5314633410	Ca21chr2_C_albicans_SC5314636935				Ca21chr2_C_albicans_SC5314633410			FALSE
Ca21chr2_C_albicans_SC5314	633571	Ca21chr2_C_albicans_SC5314	636965	Ca21chr2_C_albicans_SC5314633571	Ca21chr2_C_albicans_SC5314636965				Ca21chr2_C_albicans_SC5314633571			FALSE
Ca21chr2_C_albicans_SC5314	634570	Ca21chr2_C_albicans_SC5314	637031	Ca21chr2_C_albicans_SC5314634570	Ca21chr2_C_albicans_SC5314637031				Ca21chr2_C_albicans_SC5314634570			FALSE
Ca21chr2_C_albicans_SC5314	635775	Ca21chr2_C_albicans_SC5314	637262	Ca21chr2_C_albicans_SC5314635775	Ca21chr2_C_albicans_SC5314637262				Ca21chr2_C_albicans_SC5314635775			FALSE
Ca21chr2_C_albicans_SC5314	636716	Ca21chr2_C_albicans_SC5314	637282	Ca21chr2_C_albicans_SC5314636716	Ca21chr2_C_albicans_SC5314637282				Ca21chr2_C_albicans_SC5314636716			FALSE
Ca21chr2_C_albicans_SC5314	636860	Ca21chr2_C_albicans_SC5314	637476	Ca21chr2_C_albicans_SC5314636860	Ca21chr2_C_albicans_SC5314637476				Ca21chr2_C_albicans_SC5314636860			FALSE
Ca21chr2_C_albicans_SC5314	636935	Ca21chr2_C_albicans_SC5314	646477	Ca21chr2_C_albicans_SC5314636935	Ca21chr2_C_albicans_SC5314646477				Ca21chr2_C_albicans_SC5314636935			FALSE
Ca21chr2_C_albicans_SC5314	636965	Ca21chr2_C_albicans_SC5314	647080	Ca21chr2_C_albicans_SC5314636965	Ca21chr2_C_albicans_SC5314647080				Ca21chr2_C_albicans_SC5314636965			FALSE
Ca21chr2_C_albicans_SC5314	637031	Ca21chr2_C_albicans_SC5314	647533	Ca21chr2_C_albicans_SC5314637031	Ca21chr2_C_albicans_SC5314647533				Ca21chr2_C_albicans_SC5314637031			FALSE
Ca21chr2_C_albicans_SC5314	637262	Ca21chr2_C_albicans_SC5314	648064	Ca21chr2_C_albicans_SC5314637262	Ca21chr2_C_albicans_SC5314648064				Ca21chr2_C_albicans_SC5314637262			FALSE
Ca21chr2_C_albicans_SC5314	637282	Ca21chr2_C_albicans_SC5314	648566	Ca21chr2_C_albicans_SC5314637282	Ca21chr2_C_albicans_SC5314648566				Ca21chr2_C_albicans_SC5314637282			FALSE
Ca21chr2_C_albicans_SC5314	637476	Ca21chr2_C_albicans_SC5314	649148	Ca21chr2_C_albicans_SC5314637476	Ca21chr2_C_albicans_SC5314649148				Ca21chr2_C_albicans_SC5314637476			FALSE
Ca21chr2_C_albicans_SC5314	646477	Ca21chr2_C_albicans_SC5314	649177	Ca21chr2_C_albicans_SC5314646477	Ca21chr2_C_albicans_SC5314649177				Ca21chr2_C_albicans_SC5314646477			FALSE
Ca21chr2_C_albicans_SC5314	647080	Ca21chr2_C_albicans_SC5314	649215	Ca21chr2_C_albicans_SC5314647080	Ca21chr2_C_albicans_SC5314649215				Ca21chr2_C_albicans_SC5314647080			FALSE
Ca21chr2_C_albicans_SC5314	647533	Ca21chr2_C_albicans_SC5314	649216	Ca21chr2_C_albicans_SC5314647533	Ca21chr2_C_albicans_SC5314649216				Ca21chr2_C_albicans_SC5314647533			FALSE
Ca21chr2_C_albicans_SC5314	648064	Ca21chr2_C_albicans_SC5314	649238	Ca21chr2_C_albicans_SC5314648064	Ca21chr2_C_albicans_SC5314649238				Ca21chr2_C_albicans_SC5314648064			FALSE
Ca21chr2_C_albicans_SC5314	648566	Ca21chr2_C_albicans_SC5314	649239	Ca21chr2_C_albicans_SC5314648566	Ca21chr2_C_albicans_SC5314649239				Ca21chr2_C_albicans_SC5314648566			FALSE
Ca21chr2_C_albicans_SC5314	649148	Ca21chr2_C_albicans_SC5314	649247	Ca21chr2_C_albicans_SC5314649148	Ca21chr2_C_albicans_SC5314649247				Ca21chr2_C_albicans_SC5314649148			FALSE
Ca21chr2_C_albicans_SC5314	649177	Ca21chr2_C_albicans_SC5314	649249	Ca21chr2_C_albicans_SC5314649177	Ca21chr2_C_albicans_SC5314649249				Ca21chr2_C_albicans_SC5314649177			FALSE
Ca21chr2_C_albicans_SC5314	649215	Ca21chr2_C_albicans_SC5314	649251	Ca21chr2_C_albicans_SC5314649215	Ca21chr2_C_albicans_SC5314649251				Ca21chr2_C_albicans_SC5314649215			FALSE
Ca21chr2_C_albicans_SC5314	649216	Ca21chr2_C_albicans_SC5314	649252	Ca21chr2_C_albicans_SC5314649216	Ca21chr2_C_albicans_SC5314649252				Ca21chr2_C_albicans_SC5314649216			FALSE
Ca21chr2_C_albicans_SC5314	649238	Ca21chr2_C_albicans_SC5314	649253	Ca21chr2_C_albicans_SC5314649238	Ca21chr2_C_albicans_SC5314649253				Ca21chr2_C_albicans_SC5314649238			FALSE
Ca21chr2_C_albicans_SC5314	649239	Ca21chr2_C_albicans_SC5314	649275	Ca21chr2_C_albicans_SC5314649239	Ca21chr2_C_albicans_SC5314649275				Ca21chr2_C_albicans_SC5314649239			FALSE
Ca21chr2_C_albicans_SC5314	649247	Ca21chr2_C_albicans_SC5314	649288	Ca21chr2_C_albicans_SC5314649247	Ca21chr2_C_albicans_SC5314649288				Ca21chr2_C_albicans_SC5314649247			FALSE
Ca21chr2_C_albicans_SC5314	649249	Ca21chr2_C_albicans_SC5314	649290	Ca21chr2_C_albicans_SC5314649249	Ca21chr2_C_albicans_SC5314649290				Ca21chr2_C_albicans_SC5314649249			FALSE
Ca21chr2_C_albicans_SC5314	649251	Ca21chr2_C_albicans_SC5314	649291	Ca21chr2_C_albicans_SC5314649251	Ca21chr2_C_albicans_SC5314649291				Ca21chr2_C_albicans_SC5314649251			FALSE
Ca21chr2_C_albicans_SC5314	649252	Ca21chr2_C_albicans_SC5314	649304	Ca21chr2_C_albicans_SC5314649252	Ca21chr2_C_albicans_SC5314649304				Ca21chr2_C_albicans_SC5314649252			FALSE
Ca21chr2_C_albicans_SC5314	649253	Ca21chr2_C_albicans_SC5314	649319	Ca21chr2_C_albicans_SC5314649253	Ca21chr2_C_albicans_SC5314649319				Ca21chr2_C_albicans_SC5314649253			FALSE
Ca21chr2_C_albicans_SC5314	649275	Ca21chr2_C_albicans_SC5314	649321	Ca21chr2_C_albicans_SC5314649275	Ca21chr2_C_albicans_SC5314649321				Ca21chr2_C_albicans_SC5314649275			FALSE
Ca21chr2_C_albicans_SC5314	649288	Ca21chr2_C_albicans_SC5314	649322	Ca21chr2_C_albicans_SC5314649288	Ca21chr2_C_albicans_SC5314649322				Ca21chr2_C_albicans_SC5314649288			FALSE
Ca21chr2_C_albicans_SC5314	649290	Ca21chr2_C_albicans_SC5314	649323	Ca21chr2_C_albicans_SC5314649290	Ca21chr2_C_albicans_SC5314649323				Ca21chr2_C_albicans_SC5314649290			FALSE
Ca21chr2_C_albicans_SC5314	649291	Ca21chr2_C_albicans_SC5314	649327	Ca21chr2_C_albicans_SC5314649291	Ca21chr2_C_albicans_SC5314649327				Ca21chr2_C_albicans_SC5314649291			FALSE
Ca21chr2_C_albicans_SC5314	649304	Ca21chr2_C_albicans_SC5314	649328	Ca21chr2_C_albicans_SC5314649304	Ca21chr2_C_albicans_SC5314649328				Ca21chr2_C_albicans_SC5314649304			FALSE
Ca21chr2_C_albicans_SC5314	649319	Ca21chr2_C_albicans_SC5314	649332	Ca21chr2_C_albicans_SC5314649319	Ca21chr2_C_albicans_SC5314649332				Ca21chr2_C_albicans_SC5314649319			FALSE
Ca21chr2_C_albicans_SC5314	649321	Ca21chr2_C_albicans_SC5314	649334	Ca21chr2_C_albicans_SC5314649321	Ca21chr2_C_albicans_SC5314649334				Ca21chr2_C_albicans_SC5314649321			FALSE
Ca21chr2_C_albicans_SC5314	649322	Ca21chr2_C_albicans_SC5314	649345	Ca21chr2_C_albicans_SC5314649322	Ca21chr2_C_albicans_SC5314649345				Ca21chr2_C_albicans_SC5314649322			FALSE
Ca21chr2_C_albicans_SC5314	649323	Ca21chr2_C_albicans_SC5314	649355	Ca21chr2_C_albicans_SC5314649323	Ca21chr2_C_albicans_SC5314649355				Ca21chr2_C_albicans_SC5314649323			FALSE
Ca21chr2_C_albicans_SC5314	649327	Ca21chr2_C_albicans_SC5314	649386	Ca21chr2_C_albicans_SC5314649327	Ca21chr2_C_albicans_SC5314649386				Ca21chr2_C_albicans_SC5314649327			FALSE
Ca21chr2_C_albicans_SC5314	649328	Ca21chr2_C_albicans_SC5314	649389	Ca21chr2_C_albicans_SC5314649328	Ca21chr2_C_albicans_SC5314649389				Ca21chr2_C_albicans_SC5314649328			FALSE
Ca21chr2_C_albicans_SC5314	649332	Ca21chr2_C_albicans_SC5314	649397	Ca21chr2_C_albicans_SC5314649332	Ca21chr2_C_albicans_SC5314649397				Ca21chr2_C_albicans_SC5314649332			FALSE
Ca21chr2_C_albicans_SC5314	649334	Ca21chr2_C_albicans_SC5314	649398	Ca21chr2_C_albicans_SC5314649334	Ca21chr2_C_albicans_SC5314649398				Ca21chr2_C_albicans_SC5314649334			FALSE
Ca21chr2_C_albicans_SC5314	649345	Ca21chr2_C_albicans_SC5314	649428	Ca21chr2_C_albicans_SC5314649345	Ca21chr2_C_albicans_SC5314649428				Ca21chr2_C_albicans_SC5314649345			FALSE
Ca21chr2_C_albicans_SC5314	649355	Ca21chr2_C_albicans_SC5314	650095	Ca21chr2_C_albicans_SC5314649355	Ca21chr2_C_albicans_SC5314650095				Ca21chr2_C_albicans_SC5314649355			FALSE
Ca21chr2_C_albicans_SC5314	649386	Ca21chr2_C_albicans_SC5314	651265	Ca21chr2_C_albicans_SC5314649386	Ca21chr2_C_albicans_SC5314651265				Ca21chr2_C_albicans_SC5314649386			FALSE
Ca21chr2_C_albicans_SC5314	649389	Ca21chr2_C_albicans_SC5314	657291	Ca21chr2_C_albicans_SC5314649389	Ca21chr2_C_albicans_SC5314657291				Ca21chr2_C_albicans_SC5314649389			FALSE
Ca21chr2_C_albicans_SC5314	649397	Ca21chr2_C_albicans_SC5314	659468	Ca21chr2_C_albicans_SC5314649397	Ca21chr2_C_albicans_SC5314659468				Ca21chr2_C_albicans_SC5314649397			FALSE
Ca21chr2_C_albicans_SC5314	649398	Ca21chr2_C_albicans_SC5314	659566	Ca21chr2_C_albicans_SC5314649398	Ca21chr2_C_albicans_SC5314659566				Ca21chr2_C_albicans_SC5314649398			FALSE
Ca21chr2_C_albicans_SC5314	649428	Ca21chr2_C_albicans_SC5314	672845	Ca21chr2_C_albicans_SC5314649428	Ca21chr2_C_albicans_SC5314672845				Ca21chr2_C_albicans_SC5314649428			FALSE
Ca21chr2_C_albicans_SC5314	650095	Ca21chr2_C_albicans_SC5314	676584	Ca21chr2_C_albicans_SC5314650095	Ca21chr2_C_albicans_SC5314676584				Ca21chr2_C_albicans_SC5314650095			FALSE
Ca21chr2_C_albicans_SC5314	651265	Ca21chr2_C_albicans_SC5314	677186	Ca21chr2_C_albicans_SC5314651265	Ca21chr2_C_albicans_SC5314677186				Ca21chr2_C_albicans_SC5314651265			FALSE
Ca21chr2_C_albicans_SC5314	657291	Ca21chr2_C_albicans_SC5314	680251	Ca21chr2_C_albicans_SC5314657291	Ca21chr2_C_albicans_SC5314680251				Ca21chr2_C_albicans_SC5314657291			FALSE
Ca21chr2_C_albicans_SC5314	659468	Ca21chr2_C_albicans_SC5314	680473	Ca21chr2_C_albicans_SC5314659468	Ca21chr2_C_albicans_SC5314680473				Ca21chr2_C_albicans_SC5314659468			FALSE
Ca21chr2_C_albicans_SC5314	659566	Ca21chr2_C_albicans_SC5314	681080	Ca21chr2_C_albicans_SC5314659566	Ca21chr2_C_albicans_SC5314681080				Ca21chr2_C_albicans_SC5314659566			FALSE
Ca21chr2_C_albicans_SC5314	672845	Ca21chr2_C_albicans_SC5314	681207	Ca21chr2_C_albicans_SC5314672845	Ca21chr2_C_albicans_SC5314681207				Ca21chr2_C_albicans_SC5314672845			FALSE
Ca21chr2_C_albicans_SC5314	676584	Ca21chr2_C_albicans_SC5314	686759	Ca21chr2_C_albicans_SC5314676584	Ca21chr2_C_albicans_SC5314686759				Ca21chr2_C_albicans_SC5314676584			FALSE
Ca21chr2_C_albicans_SC5314	677186	Ca21chr2_C_albicans_SC5314	686766	Ca21chr2_C_albicans_SC5314677186	Ca21chr2_C_albicans_SC5314686766				Ca21chr2_C_albicans_SC5314677186			FALSE
Ca21chr2_C_albicans_SC5314	680251	Ca21chr2_C_albicans_SC5314	686927	Ca21chr2_C_albicans_SC5314680251	Ca21chr2_C_albicans_SC5314686927				Ca21chr2_C_albicans_SC5314680251			FALSE
Ca21chr2_C_albicans_SC5314	680473	Ca21chr2_C_albicans_SC5314	686928	Ca21chr2_C_albicans_SC5314680473	Ca21chr2_C_albicans_SC5314686928				Ca21chr2_C_albicans_SC5314680473			FALSE
Ca21chr2_C_albicans_SC5314	681080	Ca21chr2_C_albicans_SC5314	687660	Ca21chr2_C_albicans_SC5314681080	Ca21chr2_C_albicans_SC5314687660				Ca21chr2_C_albicans_SC5314681080			FALSE
Ca21chr2_C_albicans_SC5314	681207	Ca21chr2_C_albicans_SC5314	690892	Ca21chr2_C_albicans_SC5314681207	Ca21chr2_C_albicans_SC5314690892				Ca21chr2_C_albicans_SC5314681207			FALSE
Ca21chr2_C_albicans_SC5314	686759	Ca21chr2_C_albicans_SC5314	693153	Ca21chr2_C_albicans_SC5314686759	Ca21chr2_C_albicans_SC5314693153				Ca21chr2_C_albicans_SC5314686759			FALSE
Ca21chr2_C_albicans_SC5314	686766	Ca21chr2_C_albicans_SC5314	693674	Ca21chr2_C_albicans_SC5314686766	Ca21chr2_C_albicans_SC5314693674				Ca21chr2_C_albicans_SC5314686766			FALSE
Ca21chr2_C_albicans_SC5314	686927	Ca21chr2_C_albicans_SC5314	694420	Ca21chr2_C_albicans_SC5314686927	Ca21chr2_C_albicans_SC5314694420				Ca21chr2_C_albicans_SC5314686927			FALSE
Ca21chr2_C_albicans_SC5314	686928	Ca21chr2_C_albicans_SC5314	694760	Ca21chr2_C_albicans_SC5314686928	Ca21chr2_C_albicans_SC5314694760				Ca21chr2_C_albicans_SC5314686928			FALSE
Ca21chr2_C_albicans_SC5314	687660	Ca21chr2_C_albicans_SC5314	694776	Ca21chr2_C_albicans_SC5314687660	Ca21chr2_C_albicans_SC5314694776				Ca21chr2_C_albicans_SC5314687660			FALSE
Ca21chr2_C_albicans_SC5314	690892	Ca21chr2_C_albicans_SC5314	694788	Ca21chr2_C_albicans_SC5314690892	Ca21chr2_C_albicans_SC5314694788				Ca21chr2_C_albicans_SC5314690892			FALSE
Ca21chr2_C_albicans_SC5314	693153	Ca21chr2_C_albicans_SC5314	694823	Ca21chr2_C_albicans_SC5314693153	Ca21chr2_C_albicans_SC5314694823				Ca21chr2_C_albicans_SC5314693153			FALSE
Ca21chr2_C_albicans_SC5314	693674	Ca21chr2_C_albicans_SC5314	696284	Ca21chr2_C_albicans_SC5314693674	Ca21chr2_C_albicans_SC5314696284				Ca21chr2_C_albicans_SC5314693674			FALSE
Ca21chr2_C_albicans_SC5314	694420	Ca21chr2_C_albicans_SC5314	696317	Ca21chr2_C_albicans_SC5314694420	Ca21chr2_C_albicans_SC5314696317				Ca21chr2_C_albicans_SC5314694420			FALSE
Ca21chr2_C_albicans_SC5314	694760	Ca21chr2_C_albicans_SC5314	696833	Ca21chr2_C_albicans_SC5314694760	Ca21chr2_C_albicans_SC5314696833				Ca21chr2_C_albicans_SC5314694760			FALSE
Ca21chr2_C_albicans_SC5314	694776	Ca21chr2_C_albicans_SC5314	696842	Ca21chr2_C_albicans_SC5314694776	Ca21chr2_C_albicans_SC5314696842				Ca21chr2_C_albicans_SC5314694776			FALSE
Ca21chr2_C_albicans_SC5314	694788	Ca21chr2_C_albicans_SC5314	697478	Ca21chr2_C_albicans_SC5314694788	Ca21chr2_C_albicans_SC5314697478				Ca21chr2_C_albicans_SC5314694788			FALSE
Ca21chr2_C_albicans_SC5314	694823	Ca21chr2_C_albicans_SC5314	698644	Ca21chr2_C_albicans_SC5314694823	Ca21chr2_C_albicans_SC5314698644				Ca21chr2_C_albicans_SC5314694823			FALSE
Ca21chr2_C_albicans_SC5314	696284	Ca21chr2_C_albicans_SC5314	700237	Ca21chr2_C_albicans_SC5314696284	Ca21chr2_C_albicans_SC5314700237				Ca21chr2_C_albicans_SC5314696284			FALSE
Ca21chr2_C_albicans_SC5314	696317	Ca21chr2_C_albicans_SC5314	701391	Ca21chr2_C_albicans_SC5314696317	Ca21chr2_C_albicans_SC5314701391				Ca21chr2_C_albicans_SC5314696317			FALSE
Ca21chr2_C_albicans_SC5314	696833	Ca21chr2_C_albicans_SC5314	701595	Ca21chr2_C_albicans_SC5314696833	Ca21chr2_C_albicans_SC5314701595				Ca21chr2_C_albicans_SC5314696833			FALSE
Ca21chr2_C_albicans_SC5314	696842	Ca21chr2_C_albicans_SC5314	701615	Ca21chr2_C_albicans_SC5314696842	Ca21chr2_C_albicans_SC5314701615				Ca21chr2_C_albicans_SC5314696842			FALSE
Ca21chr2_C_albicans_SC5314	697478	Ca21chr2_C_albicans_SC5314	704671	Ca21chr2_C_albicans_SC5314697478	Ca21chr2_C_albicans_SC5314704671				Ca21chr2_C_albicans_SC5314697478			FALSE
Ca21chr2_C_albicans_SC5314	698644	Ca21chr2_C_albicans_SC5314	704722	Ca21chr2_C_albicans_SC5314698644	Ca21chr2_C_albicans_SC5314704722				Ca21chr2_C_albicans_SC5314698644			FALSE
Ca21chr2_C_albicans_SC5314	700237	Ca21chr2_C_albicans_SC5314	706913	Ca21chr2_C_albicans_SC5314700237	Ca21chr2_C_albicans_SC5314706913				Ca21chr2_C_albicans_SC5314700237			FALSE
Ca21chr2_C_albicans_SC5314	701391	Ca21chr2_C_albicans_SC5314	707258	Ca21chr2_C_albicans_SC5314701391	Ca21chr2_C_albicans_SC5314707258				Ca21chr2_C_albicans_SC5314701391			FALSE
Ca21chr2_C_albicans_SC5314	701595	Ca21chr2_C_albicans_SC5314	707276	Ca21chr2_C_albicans_SC5314701595	Ca21chr2_C_albicans_SC5314707276				Ca21chr2_C_albicans_SC5314701595			FALSE
Ca21chr2_C_albicans_SC5314	701615	Ca21chr2_C_albicans_SC5314	707561	Ca21chr2_C_albicans_SC5314701615	Ca21chr2_C_albicans_SC5314707561				Ca21chr2_C_albicans_SC5314701615			FALSE
Ca21chr2_C_albicans_SC5314	704671	Ca21chr2_C_albicans_SC5314	707914	Ca21chr2_C_albicans_SC5314704671	Ca21chr2_C_albicans_SC5314707914				Ca21chr2_C_albicans_SC5314704671			FALSE
Ca21chr2_C_albicans_SC5314	704722	Ca21chr2_C_albicans_SC5314	707993	Ca21chr2_C_albicans_SC5314704722	Ca21chr2_C_albicans_SC5314707993				Ca21chr2_C_albicans_SC5314704722			FALSE
Ca21chr2_C_albicans_SC5314	706913	Ca21chr2_C_albicans_SC5314	707996	Ca21chr2_C_albicans_SC5314706913	Ca21chr2_C_albicans_SC5314707996				Ca21chr2_C_albicans_SC5314706913			FALSE
Ca21chr2_C_albicans_SC5314	707258	Ca21chr2_C_albicans_SC5314	708000	Ca21chr2_C_albicans_SC5314707258	Ca21chr2_C_albicans_SC5314708000				Ca21chr2_C_albicans_SC5314707258			FALSE
Ca21chr2_C_albicans_SC5314	707276	Ca21chr2_C_albicans_SC5314	708008	Ca21chr2_C_albicans_SC5314707276	Ca21chr2_C_albicans_SC5314708008				Ca21chr2_C_albicans_SC5314707276			FALSE
Ca21chr2_C_albicans_SC5314	707561	Ca21chr2_C_albicans_SC5314	708024	Ca21chr2_C_albicans_SC5314707561	Ca21chr2_C_albicans_SC5314708024				Ca21chr2_C_albicans_SC5314707561			FALSE
Ca21chr2_C_albicans_SC5314	707914	Ca21chr2_C_albicans_SC5314	708031	Ca21chr2_C_albicans_SC5314707914	Ca21chr2_C_albicans_SC5314708031				Ca21chr2_C_albicans_SC5314707914			FALSE
Ca21chr2_C_albicans_SC5314	707978	Ca21chr2_C_albicans_SC5314	708033	Ca21chr2_C_albicans_SC5314707978	Ca21chr2_C_albicans_SC5314708033				#N/A			TRUE
Ca21chr2_C_albicans_SC5314	707984	Ca21chr2_C_albicans_SC5314	708036	Ca21chr2_C_albicans_SC5314707984	Ca21chr2_C_albicans_SC5314708036				#N/A			TRUE
Ca21chr2_C_albicans_SC5314	707993	Ca21chr2_C_albicans_SC5314	708078	Ca21chr2_C_albicans_SC5314707993	Ca21chr2_C_albicans_SC5314708078				Ca21chr2_C_albicans_SC5314707993			FALSE
Ca21chr2_C_albicans_SC5314	707996	Ca21chr2_C_albicans_SC5314	708081	Ca21chr2_C_albicans_SC5314707996	Ca21chr2_C_albicans_SC5314708081				Ca21chr2_C_albicans_SC5314707996			FALSE
Ca21chr2_C_albicans_SC5314	708000	Ca21chr2_C_albicans_SC5314	708200	Ca21chr2_C_albicans_SC5314708000	Ca21chr2_C_albicans_SC5314708200				Ca21chr2_C_albicans_SC5314708000			FALSE
Ca21chr2_C_albicans_SC5314	708008	Ca21chr2_C_albicans_SC5314	708202	Ca21chr2_C_albicans_SC5314708008	Ca21chr2_C_albicans_SC5314708202				Ca21chr2_C_albicans_SC5314708008			FALSE
Ca21chr2_C_albicans_SC5314	708024	Ca21chr2_C_albicans_SC5314	708270	Ca21chr2_C_albicans_SC5314708024	Ca21chr2_C_albicans_SC5314708270				Ca21chr2_C_albicans_SC5314708024			FALSE
Ca21chr2_C_albicans_SC5314	708031	Ca21chr2_C_albicans_SC5314	708274	Ca21chr2_C_albicans_SC5314708031	Ca21chr2_C_albicans_SC5314708274				Ca21chr2_C_albicans_SC5314708031			FALSE
Ca21chr2_C_albicans_SC5314	708033	Ca21chr2_C_albicans_SC5314	708286	Ca21chr2_C_albicans_SC5314708033	Ca21chr2_C_albicans_SC5314708286				Ca21chr2_C_albicans_SC5314708033			FALSE
Ca21chr2_C_albicans_SC5314	708036	Ca21chr2_C_albicans_SC5314	708288	Ca21chr2_C_albicans_SC5314708036	Ca21chr2_C_albicans_SC5314708288				Ca21chr2_C_albicans_SC5314708036			FALSE
Ca21chr2_C_albicans_SC5314	708078	Ca21chr2_C_albicans_SC5314	709376	Ca21chr2_C_albicans_SC5314708078	Ca21chr2_C_albicans_SC5314709376				Ca21chr2_C_albicans_SC5314708078			FALSE
Ca21chr2_C_albicans_SC5314	708081	Ca21chr2_C_albicans_SC5314	709451	Ca21chr2_C_albicans_SC5314708081	Ca21chr2_C_albicans_SC5314709451				Ca21chr2_C_albicans_SC5314708081			FALSE
Ca21chr2_C_albicans_SC5314	708200	Ca21chr2_C_albicans_SC5314	709479	Ca21chr2_C_albicans_SC5314708200	Ca21chr2_C_albicans_SC5314709479				Ca21chr2_C_albicans_SC5314708200			FALSE
Ca21chr2_C_albicans_SC5314	708202	Ca21chr2_C_albicans_SC5314	709538	Ca21chr2_C_albicans_SC5314708202	Ca21chr2_C_albicans_SC5314709538				Ca21chr2_C_albicans_SC5314708202			FALSE
Ca21chr2_C_albicans_SC5314	708270	Ca21chr2_C_albicans_SC5314	709588	Ca21chr2_C_albicans_SC5314708270	Ca21chr2_C_albicans_SC5314709588				Ca21chr2_C_albicans_SC5314708270			FALSE
Ca21chr2_C_albicans_SC5314	708274	Ca21chr2_C_albicans_SC5314	711660	Ca21chr2_C_albicans_SC5314708274	Ca21chr2_C_albicans_SC5314711660				Ca21chr2_C_albicans_SC5314708274			FALSE
Ca21chr2_C_albicans_SC5314	708286	Ca21chr2_C_albicans_SC5314	713243	Ca21chr2_C_albicans_SC5314708286	Ca21chr2_C_albicans_SC5314713243				Ca21chr2_C_albicans_SC5314708286			FALSE
Ca21chr2_C_albicans_SC5314	708288	Ca21chr2_C_albicans_SC5314	713280	Ca21chr2_C_albicans_SC5314708288	Ca21chr2_C_albicans_SC5314713280				Ca21chr2_C_albicans_SC5314708288			FALSE
Ca21chr2_C_albicans_SC5314	709376	Ca21chr2_C_albicans_SC5314	714568	Ca21chr2_C_albicans_SC5314709376	Ca21chr2_C_albicans_SC5314714568				Ca21chr2_C_albicans_SC5314709376			FALSE
Ca21chr2_C_albicans_SC5314	709451	Ca21chr2_C_albicans_SC5314	718105	Ca21chr2_C_albicans_SC5314709451	Ca21chr2_C_albicans_SC5314718105				Ca21chr2_C_albicans_SC5314709451			FALSE
Ca21chr2_C_albicans_SC5314	709479	Ca21chr2_C_albicans_SC5314	719000	Ca21chr2_C_albicans_SC5314709479	Ca21chr2_C_albicans_SC5314719000				Ca21chr2_C_albicans_SC5314709479			FALSE
Ca21chr2_C_albicans_SC5314	709538	Ca21chr2_C_albicans_SC5314	721484	Ca21chr2_C_albicans_SC5314709538	Ca21chr2_C_albicans_SC5314721484				Ca21chr2_C_albicans_SC5314709538			FALSE
Ca21chr2_C_albicans_SC5314	709588	Ca21chr2_C_albicans_SC5314	721737	Ca21chr2_C_albicans_SC5314709588	Ca21chr2_C_albicans_SC5314721737				Ca21chr2_C_albicans_SC5314709588			FALSE
Ca21chr2_C_albicans_SC5314	711660	Ca21chr2_C_albicans_SC5314	723830	Ca21chr2_C_albicans_SC5314711660	Ca21chr2_C_albicans_SC5314723830				Ca21chr2_C_albicans_SC5314711660			FALSE
Ca21chr2_C_albicans_SC5314	713243	Ca21chr2_C_albicans_SC5314	724296	Ca21chr2_C_albicans_SC5314713243	Ca21chr2_C_albicans_SC5314724296				Ca21chr2_C_albicans_SC5314713243			FALSE
Ca21chr2_C_albicans_SC5314	713280	Ca21chr2_C_albicans_SC5314	729933	Ca21chr2_C_albicans_SC5314713280	Ca21chr2_C_albicans_SC5314729933				Ca21chr2_C_albicans_SC5314713280			FALSE
Ca21chr2_C_albicans_SC5314	714568	Ca21chr2_C_albicans_SC5314	730238	Ca21chr2_C_albicans_SC5314714568	Ca21chr2_C_albicans_SC5314730238				Ca21chr2_C_albicans_SC5314714568			FALSE
Ca21chr2_C_albicans_SC5314	718105	Ca21chr2_C_albicans_SC5314	730265	Ca21chr2_C_albicans_SC5314718105	Ca21chr2_C_albicans_SC5314730265				Ca21chr2_C_albicans_SC5314718105			FALSE
Ca21chr2_C_albicans_SC5314	719000	Ca21chr2_C_albicans_SC5314	730361	Ca21chr2_C_albicans_SC5314719000	Ca21chr2_C_albicans_SC5314730361				Ca21chr2_C_albicans_SC5314719000			FALSE
Ca21chr2_C_albicans_SC5314	721484	Ca21chr2_C_albicans_SC5314	731223	Ca21chr2_C_albicans_SC5314721484	Ca21chr2_C_albicans_SC5314731223				Ca21chr2_C_albicans_SC5314721484			FALSE
Ca21chr2_C_albicans_SC5314	721737	Ca21chr2_C_albicans_SC5314	741228	Ca21chr2_C_albicans_SC5314721737	Ca21chr2_C_albicans_SC5314741228				Ca21chr2_C_albicans_SC5314721737			FALSE
Ca21chr2_C_albicans_SC5314	723830	Ca21chr2_C_albicans_SC5314	741342	Ca21chr2_C_albicans_SC5314723830	Ca21chr2_C_albicans_SC5314741342				Ca21chr2_C_albicans_SC5314723830			FALSE
Ca21chr2_C_albicans_SC5314	724296	Ca21chr2_C_albicans_SC5314	741370	Ca21chr2_C_albicans_SC5314724296	Ca21chr2_C_albicans_SC5314741370				Ca21chr2_C_albicans_SC5314724296			FALSE
Ca21chr2_C_albicans_SC5314	729933	Ca21chr2_C_albicans_SC5314	741374	Ca21chr2_C_albicans_SC5314729933	Ca21chr2_C_albicans_SC5314741374				Ca21chr2_C_albicans_SC5314729933			FALSE
Ca21chr2_C_albicans_SC5314	730238	Ca21chr2_C_albicans_SC5314	741379	Ca21chr2_C_albicans_SC5314730238	Ca21chr2_C_albicans_SC5314741379				Ca21chr2_C_albicans_SC5314730238			FALSE
Ca21chr2_C_albicans_SC5314	730265	Ca21chr2_C_albicans_SC5314	741383	Ca21chr2_C_albicans_SC5314730265	Ca21chr2_C_albicans_SC5314741383				Ca21chr2_C_albicans_SC5314730265			FALSE
Ca21chr2_C_albicans_SC5314	730361	Ca21chr2_C_albicans_SC5314	741389	Ca21chr2_C_albicans_SC5314730361	Ca21chr2_C_albicans_SC5314741389				Ca21chr2_C_albicans_SC5314730361			FALSE
Ca21chr2_C_albicans_SC5314	731223	Ca21chr2_C_albicans_SC5314	741403	Ca21chr2_C_albicans_SC5314731223	Ca21chr2_C_albicans_SC5314741403				Ca21chr2_C_albicans_SC5314731223			FALSE
Ca21chr2_C_albicans_SC5314	741228	Ca21chr2_C_albicans_SC5314	747484	Ca21chr2_C_albicans_SC5314741228	Ca21chr2_C_albicans_SC5314747484				Ca21chr2_C_albicans_SC5314741228			FALSE
Ca21chr2_C_albicans_SC5314	741342	Ca21chr2_C_albicans_SC5314	747721	Ca21chr2_C_albicans_SC5314741342	Ca21chr2_C_albicans_SC5314747721				Ca21chr2_C_albicans_SC5314741342			FALSE
Ca21chr2_C_albicans_SC5314	741370	Ca21chr2_C_albicans_SC5314	747753	Ca21chr2_C_albicans_SC5314741370	Ca21chr2_C_albicans_SC5314747753				Ca21chr2_C_albicans_SC5314741370			FALSE
Ca21chr2_C_albicans_SC5314	741374	Ca21chr2_C_albicans_SC5314	747955	Ca21chr2_C_albicans_SC5314741374	Ca21chr2_C_albicans_SC5314747955				Ca21chr2_C_albicans_SC5314741374			FALSE
Ca21chr2_C_albicans_SC5314	741379	Ca21chr2_C_albicans_SC5314	748235	Ca21chr2_C_albicans_SC5314741379	Ca21chr2_C_albicans_SC5314748235				Ca21chr2_C_albicans_SC5314741379			FALSE
Ca21chr2_C_albicans_SC5314	741383	Ca21chr2_C_albicans_SC5314	748670	Ca21chr2_C_albicans_SC5314741383	Ca21chr2_C_albicans_SC5314748670				Ca21chr2_C_albicans_SC5314741383			FALSE
Ca21chr2_C_albicans_SC5314	741389	Ca21chr2_C_albicans_SC5314	748884	Ca21chr2_C_albicans_SC5314741389	Ca21chr2_C_albicans_SC5314748884				Ca21chr2_C_albicans_SC5314741389			FALSE
Ca21chr2_C_albicans_SC5314	741403	Ca21chr2_C_albicans_SC5314	750086	Ca21chr2_C_albicans_SC5314741403	Ca21chr2_C_albicans_SC5314750086				Ca21chr2_C_albicans_SC5314741403			FALSE
Ca21chr2_C_albicans_SC5314	747484	Ca21chr2_C_albicans_SC5314	750361	Ca21chr2_C_albicans_SC5314747484	Ca21chr2_C_albicans_SC5314750361				Ca21chr2_C_albicans_SC5314747484			FALSE
Ca21chr2_C_albicans_SC5314	747721	Ca21chr2_C_albicans_SC5314	750439	Ca21chr2_C_albicans_SC5314747721	Ca21chr2_C_albicans_SC5314750439				Ca21chr2_C_albicans_SC5314747721			FALSE
Ca21chr2_C_albicans_SC5314	747753	Ca21chr2_C_albicans_SC5314	750451	Ca21chr2_C_albicans_SC5314747753	Ca21chr2_C_albicans_SC5314750451				Ca21chr2_C_albicans_SC5314747753			FALSE
Ca21chr2_C_albicans_SC5314	747955	Ca21chr2_C_albicans_SC5314	750506	Ca21chr2_C_albicans_SC5314747955	Ca21chr2_C_albicans_SC5314750506				Ca21chr2_C_albicans_SC5314747955			FALSE
Ca21chr2_C_albicans_SC5314	748235	Ca21chr2_C_albicans_SC5314	750532	Ca21chr2_C_albicans_SC5314748235	Ca21chr2_C_albicans_SC5314750532				Ca21chr2_C_albicans_SC5314748235			FALSE
Ca21chr2_C_albicans_SC5314	748670	Ca21chr2_C_albicans_SC5314	750658	Ca21chr2_C_albicans_SC5314748670	Ca21chr2_C_albicans_SC5314750658				Ca21chr2_C_albicans_SC5314748670			FALSE
Ca21chr2_C_albicans_SC5314	748884	Ca21chr2_C_albicans_SC5314	751099	Ca21chr2_C_albicans_SC5314748884	Ca21chr2_C_albicans_SC5314751099				Ca21chr2_C_albicans_SC5314748884			FALSE
Ca21chr2_C_albicans_SC5314	750086	Ca21chr2_C_albicans_SC5314	751129	Ca21chr2_C_albicans_SC5314750086	Ca21chr2_C_albicans_SC5314751129				Ca21chr2_C_albicans_SC5314750086			FALSE
Ca21chr2_C_albicans_SC5314	750361	Ca21chr2_C_albicans_SC5314	751134	Ca21chr2_C_albicans_SC5314750361	Ca21chr2_C_albicans_SC5314751134				Ca21chr2_C_albicans_SC5314750361			FALSE
Ca21chr2_C_albicans_SC5314	750439	Ca21chr2_C_albicans_SC5314	751954	Ca21chr2_C_albicans_SC5314750439	Ca21chr2_C_albicans_SC5314751954				Ca21chr2_C_albicans_SC5314750439			FALSE
Ca21chr2_C_albicans_SC5314	750451	Ca21chr2_C_albicans_SC5314	751979	Ca21chr2_C_albicans_SC5314750451	Ca21chr2_C_albicans_SC5314751979				Ca21chr2_C_albicans_SC5314750451			FALSE
Ca21chr2_C_albicans_SC5314	750506	Ca21chr2_C_albicans_SC5314	752091	Ca21chr2_C_albicans_SC5314750506	Ca21chr2_C_albicans_SC5314752091				Ca21chr2_C_albicans_SC5314750506			FALSE
Ca21chr2_C_albicans_SC5314	750532	Ca21chr2_C_albicans_SC5314	752108	Ca21chr2_C_albicans_SC5314750532	Ca21chr2_C_albicans_SC5314752108				Ca21chr2_C_albicans_SC5314750532			FALSE
Ca21chr2_C_albicans_SC5314	750658	Ca21chr2_C_albicans_SC5314	752299	Ca21chr2_C_albicans_SC5314750658	Ca21chr2_C_albicans_SC5314752299				Ca21chr2_C_albicans_SC5314750658			FALSE
Ca21chr2_C_albicans_SC5314	751099	Ca21chr2_C_albicans_SC5314	752309	Ca21chr2_C_albicans_SC5314751099	Ca21chr2_C_albicans_SC5314752309				Ca21chr2_C_albicans_SC5314751099			FALSE
Ca21chr2_C_albicans_SC5314	751129	Ca21chr2_C_albicans_SC5314	752334	Ca21chr2_C_albicans_SC5314751129	Ca21chr2_C_albicans_SC5314752334				Ca21chr2_C_albicans_SC5314751129			FALSE
Ca21chr2_C_albicans_SC5314	751134	Ca21chr2_C_albicans_SC5314	752948	Ca21chr2_C_albicans_SC5314751134	Ca21chr2_C_albicans_SC5314752948				Ca21chr2_C_albicans_SC5314751134			FALSE
Ca21chr2_C_albicans_SC5314	751954	Ca21chr2_C_albicans_SC5314	753130	Ca21chr2_C_albicans_SC5314751954	Ca21chr2_C_albicans_SC5314753130				Ca21chr2_C_albicans_SC5314751954			FALSE
Ca21chr2_C_albicans_SC5314	751979	Ca21chr2_C_albicans_SC5314	753600	Ca21chr2_C_albicans_SC5314751979	Ca21chr2_C_albicans_SC5314753600				Ca21chr2_C_albicans_SC5314751979			FALSE
Ca21chr2_C_albicans_SC5314	752091	Ca21chr2_C_albicans_SC5314	753666	Ca21chr2_C_albicans_SC5314752091	Ca21chr2_C_albicans_SC5314753666				Ca21chr2_C_albicans_SC5314752091			FALSE
Ca21chr2_C_albicans_SC5314	752108	Ca21chr2_C_albicans_SC5314	753704	Ca21chr2_C_albicans_SC5314752108	Ca21chr2_C_albicans_SC5314753704				Ca21chr2_C_albicans_SC5314752108			FALSE
Ca21chr2_C_albicans_SC5314	752299	Ca21chr2_C_albicans_SC5314	753730	Ca21chr2_C_albicans_SC5314752299	Ca21chr2_C_albicans_SC5314753730				Ca21chr2_C_albicans_SC5314752299			FALSE
Ca21chr2_C_albicans_SC5314	752309	Ca21chr2_C_albicans_SC5314	753799	Ca21chr2_C_albicans_SC5314752309	Ca21chr2_C_albicans_SC5314753799				Ca21chr2_C_albicans_SC5314752309			FALSE
Ca21chr2_C_albicans_SC5314	752334	Ca21chr2_C_albicans_SC5314	753863	Ca21chr2_C_albicans_SC5314752334	Ca21chr2_C_albicans_SC5314753863				Ca21chr2_C_albicans_SC5314752334			FALSE
Ca21chr2_C_albicans_SC5314	752948	Ca21chr2_C_albicans_SC5314	754001	Ca21chr2_C_albicans_SC5314752948	Ca21chr2_C_albicans_SC5314754001				Ca21chr2_C_albicans_SC5314752948			FALSE
Ca21chr2_C_albicans_SC5314	753130	Ca21chr2_C_albicans_SC5314	754049	Ca21chr2_C_albicans_SC5314753130	Ca21chr2_C_albicans_SC5314754049				Ca21chr2_C_albicans_SC5314753130			FALSE
Ca21chr2_C_albicans_SC5314	753600	Ca21chr2_C_albicans_SC5314	754265	Ca21chr2_C_albicans_SC5314753600	Ca21chr2_C_albicans_SC5314754265				Ca21chr2_C_albicans_SC5314753600			FALSE
Ca21chr2_C_albicans_SC5314	753666	Ca21chr2_C_albicans_SC5314	754672	Ca21chr2_C_albicans_SC5314753666	Ca21chr2_C_albicans_SC5314754672				Ca21chr2_C_albicans_SC5314753666			FALSE
Ca21chr2_C_albicans_SC5314	753704	Ca21chr2_C_albicans_SC5314	756017	Ca21chr2_C_albicans_SC5314753704	Ca21chr2_C_albicans_SC5314756017				Ca21chr2_C_albicans_SC5314753704			FALSE
Ca21chr2_C_albicans_SC5314	753730	Ca21chr2_C_albicans_SC5314	756170	Ca21chr2_C_albicans_SC5314753730	Ca21chr2_C_albicans_SC5314756170				Ca21chr2_C_albicans_SC5314753730			FALSE
Ca21chr2_C_albicans_SC5314	753799	Ca21chr2_C_albicans_SC5314	756938	Ca21chr2_C_albicans_SC5314753799	Ca21chr2_C_albicans_SC5314756938				Ca21chr2_C_albicans_SC5314753799			FALSE
Ca21chr2_C_albicans_SC5314	753863	Ca21chr2_C_albicans_SC5314	757113	Ca21chr2_C_albicans_SC5314753863	Ca21chr2_C_albicans_SC5314757113				Ca21chr2_C_albicans_SC5314753863			FALSE
Ca21chr2_C_albicans_SC5314	754001	Ca21chr2_C_albicans_SC5314	757159	Ca21chr2_C_albicans_SC5314754001	Ca21chr2_C_albicans_SC5314757159				Ca21chr2_C_albicans_SC5314754001			FALSE
Ca21chr2_C_albicans_SC5314	754049	Ca21chr2_C_albicans_SC5314	757251	Ca21chr2_C_albicans_SC5314754049	Ca21chr2_C_albicans_SC5314757251				Ca21chr2_C_albicans_SC5314754049			FALSE
Ca21chr2_C_albicans_SC5314	754265	Ca21chr2_C_albicans_SC5314	760290	Ca21chr2_C_albicans_SC5314754265	Ca21chr2_C_albicans_SC5314760290				Ca21chr2_C_albicans_SC5314754265			FALSE
Ca21chr2_C_albicans_SC5314	754672	Ca21chr2_C_albicans_SC5314	763611	Ca21chr2_C_albicans_SC5314754672	Ca21chr2_C_albicans_SC5314763611				Ca21chr2_C_albicans_SC5314754672			FALSE
Ca21chr2_C_albicans_SC5314	756017	Ca21chr2_C_albicans_SC5314	763953	Ca21chr2_C_albicans_SC5314756017	Ca21chr2_C_albicans_SC5314763953				Ca21chr2_C_albicans_SC5314756017			FALSE
Ca21chr2_C_albicans_SC5314	756170	Ca21chr2_C_albicans_SC5314	763954	Ca21chr2_C_albicans_SC5314756170	Ca21chr2_C_albicans_SC5314763954				Ca21chr2_C_albicans_SC5314756170			FALSE
Ca21chr2_C_albicans_SC5314	756938	Ca21chr2_C_albicans_SC5314	763959	Ca21chr2_C_albicans_SC5314756938	Ca21chr2_C_albicans_SC5314763959				Ca21chr2_C_albicans_SC5314756938			FALSE
Ca21chr2_C_albicans_SC5314	757113	Ca21chr2_C_albicans_SC5314	763968	Ca21chr2_C_albicans_SC5314757113	Ca21chr2_C_albicans_SC5314763968				Ca21chr2_C_albicans_SC5314757113			FALSE
Ca21chr2_C_albicans_SC5314	757159	Ca21chr2_C_albicans_SC5314	763971	Ca21chr2_C_albicans_SC5314757159	Ca21chr2_C_albicans_SC5314763971				Ca21chr2_C_albicans_SC5314757159			FALSE
Ca21chr2_C_albicans_SC5314	757251	Ca21chr2_C_albicans_SC5314	763973	Ca21chr2_C_albicans_SC5314757251	Ca21chr2_C_albicans_SC5314763973				Ca21chr2_C_albicans_SC5314757251			FALSE
Ca21chr2_C_albicans_SC5314	760290	Ca21chr2_C_albicans_SC5314	763980	Ca21chr2_C_albicans_SC5314760290	Ca21chr2_C_albicans_SC5314763980				Ca21chr2_C_albicans_SC5314760290			FALSE
Ca21chr2_C_albicans_SC5314	763611	Ca21chr2_C_albicans_SC5314	763986	Ca21chr2_C_albicans_SC5314763611	Ca21chr2_C_albicans_SC5314763986				Ca21chr2_C_albicans_SC5314763611			FALSE
Ca21chr2_C_albicans_SC5314	763953	Ca21chr2_C_albicans_SC5314	763989	Ca21chr2_C_albicans_SC5314763953	Ca21chr2_C_albicans_SC5314763989				Ca21chr2_C_albicans_SC5314763953			FALSE
Ca21chr2_C_albicans_SC5314	763954	Ca21chr2_C_albicans_SC5314	763991	Ca21chr2_C_albicans_SC5314763954	Ca21chr2_C_albicans_SC5314763991				Ca21chr2_C_albicans_SC5314763954			FALSE
Ca21chr2_C_albicans_SC5314	763959	Ca21chr2_C_albicans_SC5314	763998	Ca21chr2_C_albicans_SC5314763959	Ca21chr2_C_albicans_SC5314763998				Ca21chr2_C_albicans_SC5314763959			FALSE
Ca21chr2_C_albicans_SC5314	764196	Ca21chr2_C_albicans_SC5314	764025	Ca21chr2_C_albicans_SC5314764196	Ca21chr2_C_albicans_SC5314764025				Ca21chr2_C_albicans_SC5314764196			FALSE
Ca21chr2_C_albicans_SC5314	764203	Ca21chr2_C_albicans_SC5314	764061	Ca21chr2_C_albicans_SC5314764203	Ca21chr2_C_albicans_SC5314764061				Ca21chr2_C_albicans_SC5314764203			FALSE
Ca21chr2_C_albicans_SC5314	764214	Ca21chr2_C_albicans_SC5314	764070	Ca21chr2_C_albicans_SC5314764214	Ca21chr2_C_albicans_SC5314764070				Ca21chr2_C_albicans_SC5314764214			FALSE
Ca21chr2_C_albicans_SC5314	764217	Ca21chr2_C_albicans_SC5314	764074	Ca21chr2_C_albicans_SC5314764217	Ca21chr2_C_albicans_SC5314764074				Ca21chr2_C_albicans_SC5314764217			FALSE
Ca21chr2_C_albicans_SC5314	764220	Ca21chr2_C_albicans_SC5314	764076	Ca21chr2_C_albicans_SC5314764220	Ca21chr2_C_albicans_SC5314764076				Ca21chr2_C_albicans_SC5314764220			FALSE
Ca21chr2_C_albicans_SC5314	764223	Ca21chr2_C_albicans_SC5314	764079	Ca21chr2_C_albicans_SC5314764223	Ca21chr2_C_albicans_SC5314764079				Ca21chr2_C_albicans_SC5314764223			FALSE
Ca21chr2_C_albicans_SC5314	764224	Ca21chr2_C_albicans_SC5314	764082	Ca21chr2_C_albicans_SC5314764224	Ca21chr2_C_albicans_SC5314764082				Ca21chr2_C_albicans_SC5314764224			FALSE
Ca21chr2_C_albicans_SC5314	764226	Ca21chr2_C_albicans_SC5314	764083	Ca21chr2_C_albicans_SC5314764226	Ca21chr2_C_albicans_SC5314764083				Ca21chr2_C_albicans_SC5314764226			FALSE
Ca21chr2_C_albicans_SC5314	764229	Ca21chr2_C_albicans_SC5314	764085	Ca21chr2_C_albicans_SC5314764229	Ca21chr2_C_albicans_SC5314764085				Ca21chr2_C_albicans_SC5314764229			FALSE
Ca21chr2_C_albicans_SC5314	764230	Ca21chr2_C_albicans_SC5314	764088	Ca21chr2_C_albicans_SC5314764230	Ca21chr2_C_albicans_SC5314764088				Ca21chr2_C_albicans_SC5314764230			FALSE
Ca21chr2_C_albicans_SC5314	764232	Ca21chr2_C_albicans_SC5314	764089	Ca21chr2_C_albicans_SC5314764232	Ca21chr2_C_albicans_SC5314764089				Ca21chr2_C_albicans_SC5314764232			FALSE
Ca21chr2_C_albicans_SC5314	764235	Ca21chr2_C_albicans_SC5314	764100	Ca21chr2_C_albicans_SC5314764235	Ca21chr2_C_albicans_SC5314764100				Ca21chr2_C_albicans_SC5314764235			FALSE
Ca21chr2_C_albicans_SC5314	764241	Ca21chr2_C_albicans_SC5314	764103	Ca21chr2_C_albicans_SC5314764241	Ca21chr2_C_albicans_SC5314764103				Ca21chr2_C_albicans_SC5314764241			FALSE
Ca21chr2_C_albicans_SC5314	764247	Ca21chr2_C_albicans_SC5314	764113	Ca21chr2_C_albicans_SC5314764247	Ca21chr2_C_albicans_SC5314764113				Ca21chr2_C_albicans_SC5314764247			FALSE
Ca21chr2_C_albicans_SC5314	764253	Ca21chr2_C_albicans_SC5314	764124	Ca21chr2_C_albicans_SC5314764253	Ca21chr2_C_albicans_SC5314764124				Ca21chr2_C_albicans_SC5314764253			FALSE
Ca21chr2_C_albicans_SC5314	764256	Ca21chr2_C_albicans_SC5314	764127	Ca21chr2_C_albicans_SC5314764256	Ca21chr2_C_albicans_SC5314764127				#N/A			TRUE
Ca21chr2_C_albicans_SC5314	764259	Ca21chr2_C_albicans_SC5314	764139	Ca21chr2_C_albicans_SC5314764259	Ca21chr2_C_albicans_SC5314764139				Ca21chr2_C_albicans_SC5314764259			FALSE
Ca21chr2_C_albicans_SC5314	764260	Ca21chr2_C_albicans_SC5314	764151	Ca21chr2_C_albicans_SC5314764260	Ca21chr2_C_albicans_SC5314764151				Ca21chr2_C_albicans_SC5314764260			FALSE
Ca21chr2_C_albicans_SC5314	764261	Ca21chr2_C_albicans_SC5314	764154	Ca21chr2_C_albicans_SC5314764261	Ca21chr2_C_albicans_SC5314764154				Ca21chr2_C_albicans_SC5314764261			FALSE
Ca21chr2_C_albicans_SC5314	764262	Ca21chr2_C_albicans_SC5314	764160	Ca21chr2_C_albicans_SC5314764262	Ca21chr2_C_albicans_SC5314764160				Ca21chr2_C_albicans_SC5314764262			FALSE
Ca21chr2_C_albicans_SC5314	764268	Ca21chr2_C_albicans_SC5314	764169	Ca21chr2_C_albicans_SC5314764268	Ca21chr2_C_albicans_SC5314764169				Ca21chr2_C_albicans_SC5314764268			FALSE
Ca21chr2_C_albicans_SC5314	764269	Ca21chr2_C_albicans_SC5314	764170	Ca21chr2_C_albicans_SC5314764269	Ca21chr2_C_albicans_SC5314764170				Ca21chr2_C_albicans_SC5314764269			FALSE
Ca21chr2_C_albicans_SC5314	764319	Ca21chr2_C_albicans_SC5314	764175	Ca21chr2_C_albicans_SC5314764319	Ca21chr2_C_albicans_SC5314764175				#N/A			TRUE
Ca21chr2_C_albicans_SC5314	764383	Ca21chr2_C_albicans_SC5314	764187	Ca21chr2_C_albicans_SC5314764383	Ca21chr2_C_albicans_SC5314764187				Ca21chr2_C_albicans_SC5314764383			FALSE
Ca21chr2_C_albicans_SC5314	764391	Ca21chr2_C_albicans_SC5314	764190	Ca21chr2_C_albicans_SC5314764391	Ca21chr2_C_albicans_SC5314764190				Ca21chr2_C_albicans_SC5314764391			FALSE
Ca21chr2_C_albicans_SC5314	764394	Ca21chr2_C_albicans_SC5314	764196	Ca21chr2_C_albicans_SC5314764394	Ca21chr2_C_albicans_SC5314764196				Ca21chr2_C_albicans_SC5314764394			FALSE
Ca21chr2_C_albicans_SC5314	764409	Ca21chr2_C_albicans_SC5314	764203	Ca21chr2_C_albicans_SC5314764409	Ca21chr2_C_albicans_SC5314764203				Ca21chr2_C_albicans_SC5314764409			FALSE
Ca21chr2_C_albicans_SC5314	764412	Ca21chr2_C_albicans_SC5314	764214	Ca21chr2_C_albicans_SC5314764412	Ca21chr2_C_albicans_SC5314764214				Ca21chr2_C_albicans_SC5314764412			FALSE
Ca21chr2_C_albicans_SC5314	764413	Ca21chr2_C_albicans_SC5314	764217	Ca21chr2_C_albicans_SC5314764413	Ca21chr2_C_albicans_SC5314764217				Ca21chr2_C_albicans_SC5314764413			FALSE
Ca21chr2_C_albicans_SC5314	764418	Ca21chr2_C_albicans_SC5314	764220	Ca21chr2_C_albicans_SC5314764418	Ca21chr2_C_albicans_SC5314764220				Ca21chr2_C_albicans_SC5314764418			FALSE
Ca21chr2_C_albicans_SC5314	765070	Ca21chr2_C_albicans_SC5314	764223	Ca21chr2_C_albicans_SC5314765070	Ca21chr2_C_albicans_SC5314764223				Ca21chr2_C_albicans_SC5314765070			FALSE
Ca21chr2_C_albicans_SC5314	766689	Ca21chr2_C_albicans_SC5314	764224	Ca21chr2_C_albicans_SC5314766689	Ca21chr2_C_albicans_SC5314764224				Ca21chr2_C_albicans_SC5314766689			FALSE
Ca21chr2_C_albicans_SC5314	776225	Ca21chr2_C_albicans_SC5314	764226	Ca21chr2_C_albicans_SC5314776225	Ca21chr2_C_albicans_SC5314764226				Ca21chr2_C_albicans_SC5314776225			FALSE
Ca21chr2_C_albicans_SC5314	782438	Ca21chr2_C_albicans_SC5314	764229	Ca21chr2_C_albicans_SC5314782438	Ca21chr2_C_albicans_SC5314764229				Ca21chr2_C_albicans_SC5314782438			FALSE
Ca21chr2_C_albicans_SC5314	786085	Ca21chr2_C_albicans_SC5314	764230	Ca21chr2_C_albicans_SC5314786085	Ca21chr2_C_albicans_SC5314764230				Ca21chr2_C_albicans_SC5314786085			FALSE
Ca21chr2_C_albicans_SC5314	786290	Ca21chr2_C_albicans_SC5314	764232	Ca21chr2_C_albicans_SC5314786290	Ca21chr2_C_albicans_SC5314764232				Ca21chr2_C_albicans_SC5314786290			FALSE
Ca21chr2_C_albicans_SC5314	786302	Ca21chr2_C_albicans_SC5314	764235	Ca21chr2_C_albicans_SC5314786302	Ca21chr2_C_albicans_SC5314764235				Ca21chr2_C_albicans_SC5314786302			FALSE
Ca21chr2_C_albicans_SC5314	786545	Ca21chr2_C_albicans_SC5314	764241	Ca21chr2_C_albicans_SC5314786545	Ca21chr2_C_albicans_SC5314764241				Ca21chr2_C_albicans_SC5314786545			FALSE
Ca21chr2_C_albicans_SC5314	786860	Ca21chr2_C_albicans_SC5314	764247	Ca21chr2_C_albicans_SC5314786860	Ca21chr2_C_albicans_SC5314764247				Ca21chr2_C_albicans_SC5314786860			FALSE
Ca21chr2_C_albicans_SC5314	793183	Ca21chr2_C_albicans_SC5314	764253	Ca21chr2_C_albicans_SC5314793183	Ca21chr2_C_albicans_SC5314764253				Ca21chr2_C_albicans_SC5314793183			FALSE
Ca21chr2_C_albicans_SC5314	793207	Ca21chr2_C_albicans_SC5314	764259	Ca21chr2_C_albicans_SC5314793207	Ca21chr2_C_albicans_SC5314764259				Ca21chr2_C_albicans_SC5314793207			FALSE
Ca21chr2_C_albicans_SC5314	793504	Ca21chr2_C_albicans_SC5314	764260	Ca21chr2_C_albicans_SC5314793504	Ca21chr2_C_albicans_SC5314764260				Ca21chr2_C_albicans_SC5314793504			FALSE
Ca21chr2_C_albicans_SC5314	793591	Ca21chr2_C_albicans_SC5314	764261	Ca21chr2_C_albicans_SC5314793591	Ca21chr2_C_albicans_SC5314764261				Ca21chr2_C_albicans_SC5314793591			FALSE
Ca21chr2_C_albicans_SC5314	793618	Ca21chr2_C_albicans_SC5314	764262	Ca21chr2_C_albicans_SC5314793618	Ca21chr2_C_albicans_SC5314764262				Ca21chr2_C_albicans_SC5314793618			FALSE
Ca21chr2_C_albicans_SC5314	793624	Ca21chr2_C_albicans_SC5314	764268	Ca21chr2_C_albicans_SC5314793624	Ca21chr2_C_albicans_SC5314764268				Ca21chr2_C_albicans_SC5314793624			FALSE
Ca21chr2_C_albicans_SC5314	793774	Ca21chr2_C_albicans_SC5314	764269	Ca21chr2_C_albicans_SC5314793774	Ca21chr2_C_albicans_SC5314764269				Ca21chr2_C_albicans_SC5314793774			FALSE
Ca21chr2_C_albicans_SC5314	793777	Ca21chr2_C_albicans_SC5314	764281	Ca21chr2_C_albicans_SC5314793777	Ca21chr2_C_albicans_SC5314764281				Ca21chr2_C_albicans_SC5314793777			FALSE
Ca21chr2_C_albicans_SC5314	793793	Ca21chr2_C_albicans_SC5314	764383	Ca21chr2_C_albicans_SC5314793793	Ca21chr2_C_albicans_SC5314764383				Ca21chr2_C_albicans_SC5314793793			FALSE
Ca21chr2_C_albicans_SC5314	793800	Ca21chr2_C_albicans_SC5314	764391	Ca21chr2_C_albicans_SC5314793800	Ca21chr2_C_albicans_SC5314764391				Ca21chr2_C_albicans_SC5314793800			FALSE
Ca21chr2_C_albicans_SC5314	794262	Ca21chr2_C_albicans_SC5314	764394	Ca21chr2_C_albicans_SC5314794262	Ca21chr2_C_albicans_SC5314764394				Ca21chr2_C_albicans_SC5314794262			FALSE
Ca21chr2_C_albicans_SC5314	794344	Ca21chr2_C_albicans_SC5314	764409	Ca21chr2_C_albicans_SC5314794344	Ca21chr2_C_albicans_SC5314764409				Ca21chr2_C_albicans_SC5314794344			FALSE
Ca21chr2_C_albicans_SC5314	794356	Ca21chr2_C_albicans_SC5314	764412	Ca21chr2_C_albicans_SC5314794356	Ca21chr2_C_albicans_SC5314764412				Ca21chr2_C_albicans_SC5314794356			FALSE
Ca21chr2_C_albicans_SC5314	795121	Ca21chr2_C_albicans_SC5314	764413	Ca21chr2_C_albicans_SC5314795121	Ca21chr2_C_albicans_SC5314764413				Ca21chr2_C_albicans_SC5314795121			FALSE
Ca21chr2_C_albicans_SC5314	795731	Ca21chr2_C_albicans_SC5314	764418	Ca21chr2_C_albicans_SC5314795731	Ca21chr2_C_albicans_SC5314764418				Ca21chr2_C_albicans_SC5314795731			FALSE
Ca21chr2_C_albicans_SC5314	795916	Ca21chr2_C_albicans_SC5314	765070	Ca21chr2_C_albicans_SC5314795916	Ca21chr2_C_albicans_SC5314765070				Ca21chr2_C_albicans_SC5314795916			FALSE
Ca21chr2_C_albicans_SC5314	797101	Ca21chr2_C_albicans_SC5314	766689	Ca21chr2_C_albicans_SC5314797101	Ca21chr2_C_albicans_SC5314766689				Ca21chr2_C_albicans_SC5314797101			FALSE
Ca21chr2_C_albicans_SC5314	797860	Ca21chr2_C_albicans_SC5314	776225	Ca21chr2_C_albicans_SC5314797860	Ca21chr2_C_albicans_SC5314776225				Ca21chr2_C_albicans_SC5314797860			FALSE
Ca21chr2_C_albicans_SC5314	797965	Ca21chr2_C_albicans_SC5314	782438	Ca21chr2_C_albicans_SC5314797965	Ca21chr2_C_albicans_SC5314782438				Ca21chr2_C_albicans_SC5314797965			FALSE
Ca21chr2_C_albicans_SC5314	797974	Ca21chr2_C_albicans_SC5314	786085	Ca21chr2_C_albicans_SC5314797974	Ca21chr2_C_albicans_SC5314786085				Ca21chr2_C_albicans_SC5314797974			FALSE
Ca21chr2_C_albicans_SC5314	798046	Ca21chr2_C_albicans_SC5314	786290	Ca21chr2_C_albicans_SC5314798046	Ca21chr2_C_albicans_SC5314786290				Ca21chr2_C_albicans_SC5314798046			FALSE
Ca21chr2_C_albicans_SC5314	798049	Ca21chr2_C_albicans_SC5314	786302	Ca21chr2_C_albicans_SC5314798049	Ca21chr2_C_albicans_SC5314786302				Ca21chr2_C_albicans_SC5314798049			FALSE
Ca21chr2_C_albicans_SC5314	798073	Ca21chr2_C_albicans_SC5314	786545	Ca21chr2_C_albicans_SC5314798073	Ca21chr2_C_albicans_SC5314786545				Ca21chr2_C_albicans_SC5314798073			FALSE
Ca21chr2_C_albicans_SC5314	798103	Ca21chr2_C_albicans_SC5314	786860	Ca21chr2_C_albicans_SC5314798103	Ca21chr2_C_albicans_SC5314786860				Ca21chr2_C_albicans_SC5314798103			FALSE
Ca21chr2_C_albicans_SC5314	799091	Ca21chr2_C_albicans_SC5314	793183	Ca21chr2_C_albicans_SC5314799091	Ca21chr2_C_albicans_SC5314793183				Ca21chr2_C_albicans_SC5314799091			FALSE
Ca21chr2_C_albicans_SC5314	799106	Ca21chr2_C_albicans_SC5314	793207	Ca21chr2_C_albicans_SC5314799106	Ca21chr2_C_albicans_SC5314793207				Ca21chr2_C_albicans_SC5314799106			FALSE
Ca21chr2_C_albicans_SC5314	799580	Ca21chr2_C_albicans_SC5314	793504	Ca21chr2_C_albicans_SC5314799580	Ca21chr2_C_albicans_SC5314793504				Ca21chr2_C_albicans_SC5314799580			FALSE
Ca21chr2_C_albicans_SC5314	799637	Ca21chr2_C_albicans_SC5314	793591	Ca21chr2_C_albicans_SC5314799637	Ca21chr2_C_albicans_SC5314793591				Ca21chr2_C_albicans_SC5314799637			FALSE
Ca21chr2_C_albicans_SC5314	799745	Ca21chr2_C_albicans_SC5314	793618	Ca21chr2_C_albicans_SC5314799745	Ca21chr2_C_albicans_SC5314793618				Ca21chr2_C_albicans_SC5314799745			FALSE
Ca21chr2_C_albicans_SC5314	799750	Ca21chr2_C_albicans_SC5314	793624	Ca21chr2_C_albicans_SC5314799750	Ca21chr2_C_albicans_SC5314793624				Ca21chr2_C_albicans_SC5314799750			FALSE
Ca21chr2_C_albicans_SC5314	799844	Ca21chr2_C_albicans_SC5314	793774	Ca21chr2_C_albicans_SC5314799844	Ca21chr2_C_albicans_SC5314793774				Ca21chr2_C_albicans_SC5314799844			FALSE
Ca21chr2_C_albicans_SC5314	799856	Ca21chr2_C_albicans_SC5314	793777	Ca21chr2_C_albicans_SC5314799856	Ca21chr2_C_albicans_SC5314793777				Ca21chr2_C_albicans_SC5314799856			FALSE
Ca21chr2_C_albicans_SC5314	799940	Ca21chr2_C_albicans_SC5314	793793	Ca21chr2_C_albicans_SC5314799940	Ca21chr2_C_albicans_SC5314793793				Ca21chr2_C_albicans_SC5314799940			FALSE
Ca21chr2_C_albicans_SC5314	800039	Ca21chr2_C_albicans_SC5314	793800	Ca21chr2_C_albicans_SC5314800039	Ca21chr2_C_albicans_SC5314793800				Ca21chr2_C_albicans_SC5314800039			FALSE
Ca21chr2_C_albicans_SC5314	800058	Ca21chr2_C_albicans_SC5314	794262	Ca21chr2_C_albicans_SC5314800058	Ca21chr2_C_albicans_SC5314794262				Ca21chr2_C_albicans_SC5314800058			FALSE
Ca21chr2_C_albicans_SC5314	800194	Ca21chr2_C_albicans_SC5314	794344	Ca21chr2_C_albicans_SC5314800194	Ca21chr2_C_albicans_SC5314794344				Ca21chr2_C_albicans_SC5314800194			FALSE
Ca21chr2_C_albicans_SC5314	802524	Ca21chr2_C_albicans_SC5314	794356	Ca21chr2_C_albicans_SC5314802524	Ca21chr2_C_albicans_SC5314794356				Ca21chr2_C_albicans_SC5314802524			FALSE
Ca21chr2_C_albicans_SC5314	802554	Ca21chr2_C_albicans_SC5314	795121	Ca21chr2_C_albicans_SC5314802554	Ca21chr2_C_albicans_SC5314795121				Ca21chr2_C_albicans_SC5314802554			FALSE
Ca21chr2_C_albicans_SC5314	802557	Ca21chr2_C_albicans_SC5314	795731	Ca21chr2_C_albicans_SC5314802557	Ca21chr2_C_albicans_SC5314795731				Ca21chr2_C_albicans_SC5314802557			FALSE
Ca21chr2_C_albicans_SC5314	802584	Ca21chr2_C_albicans_SC5314	795916	Ca21chr2_C_albicans_SC5314802584	Ca21chr2_C_albicans_SC5314795916				Ca21chr2_C_albicans_SC5314802584			FALSE
Ca21chr2_C_albicans_SC5314	802719	Ca21chr2_C_albicans_SC5314	797101	Ca21chr2_C_albicans_SC5314802719	Ca21chr2_C_albicans_SC5314797101				Ca21chr2_C_albicans_SC5314802719			FALSE
Ca21chr2_C_albicans_SC5314	802755	Ca21chr2_C_albicans_SC5314	797860	Ca21chr2_C_albicans_SC5314802755	Ca21chr2_C_albicans_SC5314797860				Ca21chr2_C_albicans_SC5314802755			FALSE
Ca21chr2_C_albicans_SC5314	802860	Ca21chr2_C_albicans_SC5314	797965	Ca21chr2_C_albicans_SC5314802860	Ca21chr2_C_albicans_SC5314797965				Ca21chr2_C_albicans_SC5314802860			FALSE
Ca21chr2_C_albicans_SC5314	802983	Ca21chr2_C_albicans_SC5314	797974	Ca21chr2_C_albicans_SC5314802983	Ca21chr2_C_albicans_SC5314797974				Ca21chr2_C_albicans_SC5314802983			FALSE
Ca21chr2_C_albicans_SC5314	803019	Ca21chr2_C_albicans_SC5314	798046	Ca21chr2_C_albicans_SC5314803019	Ca21chr2_C_albicans_SC5314798046				Ca21chr2_C_albicans_SC5314803019			FALSE
Ca21chr2_C_albicans_SC5314	803040	Ca21chr2_C_albicans_SC5314	798049	Ca21chr2_C_albicans_SC5314803040	Ca21chr2_C_albicans_SC5314798049				Ca21chr2_C_albicans_SC5314803040			FALSE
Ca21chr2_C_albicans_SC5314	803088	Ca21chr2_C_albicans_SC5314	798073	Ca21chr2_C_albicans_SC5314803088	Ca21chr2_C_albicans_SC5314798073				Ca21chr2_C_albicans_SC5314803088			FALSE
Ca21chr2_C_albicans_SC5314	803137	Ca21chr2_C_albicans_SC5314	798103	Ca21chr2_C_albicans_SC5314803137	Ca21chr2_C_albicans_SC5314798103				Ca21chr2_C_albicans_SC5314803137			FALSE
Ca21chr2_C_albicans_SC5314	803160	Ca21chr2_C_albicans_SC5314	799091	Ca21chr2_C_albicans_SC5314803160	Ca21chr2_C_albicans_SC5314799091				Ca21chr2_C_albicans_SC5314803160			FALSE
Ca21chr2_C_albicans_SC5314	803217	Ca21chr2_C_albicans_SC5314	799106	Ca21chr2_C_albicans_SC5314803217	Ca21chr2_C_albicans_SC5314799106				Ca21chr2_C_albicans_SC5314803217			FALSE
Ca21chr2_C_albicans_SC5314	803229	Ca21chr2_C_albicans_SC5314	799580	Ca21chr2_C_albicans_SC5314803229	Ca21chr2_C_albicans_SC5314799580				Ca21chr2_C_albicans_SC5314803229			FALSE
Ca21chr2_C_albicans_SC5314	803244	Ca21chr2_C_albicans_SC5314	799637	Ca21chr2_C_albicans_SC5314803244	Ca21chr2_C_albicans_SC5314799637				Ca21chr2_C_albicans_SC5314803244			FALSE
Ca21chr2_C_albicans_SC5314	803262	Ca21chr2_C_albicans_SC5314	799745	Ca21chr2_C_albicans_SC5314803262	Ca21chr2_C_albicans_SC5314799745				Ca21chr2_C_albicans_SC5314803262			FALSE
Ca21chr2_C_albicans_SC5314	803334	Ca21chr2_C_albicans_SC5314	799750	Ca21chr2_C_albicans_SC5314803334	Ca21chr2_C_albicans_SC5314799750				Ca21chr2_C_albicans_SC5314803334			FALSE
Ca21chr2_C_albicans_SC5314	803475	Ca21chr2_C_albicans_SC5314	799844	Ca21chr2_C_albicans_SC5314803475	Ca21chr2_C_albicans_SC5314799844				Ca21chr2_C_albicans_SC5314803475			FALSE
Ca21chr2_C_albicans_SC5314	803529	Ca21chr2_C_albicans_SC5314	799856	Ca21chr2_C_albicans_SC5314803529	Ca21chr2_C_albicans_SC5314799856				Ca21chr2_C_albicans_SC5314803529			FALSE
Ca21chr2_C_albicans_SC5314	803538	Ca21chr2_C_albicans_SC5314	799940	Ca21chr2_C_albicans_SC5314803538	Ca21chr2_C_albicans_SC5314799940				Ca21chr2_C_albicans_SC5314803538			FALSE
Ca21chr2_C_albicans_SC5314	803553	Ca21chr2_C_albicans_SC5314	800039	Ca21chr2_C_albicans_SC5314803553	Ca21chr2_C_albicans_SC5314800039				Ca21chr2_C_albicans_SC5314803553			FALSE
Ca21chr2_C_albicans_SC5314	803565	Ca21chr2_C_albicans_SC5314	800058	Ca21chr2_C_albicans_SC5314803565	Ca21chr2_C_albicans_SC5314800058				Ca21chr2_C_albicans_SC5314803565			FALSE
Ca21chr2_C_albicans_SC5314	803628	Ca21chr2_C_albicans_SC5314	800194	Ca21chr2_C_albicans_SC5314803628	Ca21chr2_C_albicans_SC5314800194				Ca21chr2_C_albicans_SC5314803628			FALSE
Ca21chr2_C_albicans_SC5314	803697	Ca21chr2_C_albicans_SC5314	802524	Ca21chr2_C_albicans_SC5314803697	Ca21chr2_C_albicans_SC5314802524				Ca21chr2_C_albicans_SC5314803697			FALSE
Ca21chr2_C_albicans_SC5314	803705	Ca21chr2_C_albicans_SC5314	802554	Ca21chr2_C_albicans_SC5314803705	Ca21chr2_C_albicans_SC5314802554				Ca21chr2_C_albicans_SC5314803705			FALSE
Ca21chr2_C_albicans_SC5314	803712	Ca21chr2_C_albicans_SC5314	802557	Ca21chr2_C_albicans_SC5314803712	Ca21chr2_C_albicans_SC5314802557				Ca21chr2_C_albicans_SC5314803712			FALSE
Ca21chr2_C_albicans_SC5314	803727	Ca21chr2_C_albicans_SC5314	802584	Ca21chr2_C_albicans_SC5314803727	Ca21chr2_C_albicans_SC5314802584				Ca21chr2_C_albicans_SC5314803727			FALSE
Ca21chr2_C_albicans_SC5314	804841	Ca21chr2_C_albicans_SC5314	802719	Ca21chr2_C_albicans_SC5314804841	Ca21chr2_C_albicans_SC5314802719				Ca21chr2_C_albicans_SC5314804841			FALSE
Ca21chr2_C_albicans_SC5314	804844	Ca21chr2_C_albicans_SC5314	802755	Ca21chr2_C_albicans_SC5314804844	Ca21chr2_C_albicans_SC5314802755				Ca21chr2_C_albicans_SC5314804844			FALSE
Ca21chr2_C_albicans_SC5314	805006	Ca21chr2_C_albicans_SC5314	802860	Ca21chr2_C_albicans_SC5314805006	Ca21chr2_C_albicans_SC5314802860				Ca21chr2_C_albicans_SC5314805006			FALSE
Ca21chr2_C_albicans_SC5314	805138	Ca21chr2_C_albicans_SC5314	802983	Ca21chr2_C_albicans_SC5314805138	Ca21chr2_C_albicans_SC5314802983				Ca21chr2_C_albicans_SC5314805138			FALSE
Ca21chr2_C_albicans_SC5314	805208	Ca21chr2_C_albicans_SC5314	803019	Ca21chr2_C_albicans_SC5314805208	Ca21chr2_C_albicans_SC5314803019				Ca21chr2_C_albicans_SC5314805208			FALSE
Ca21chr2_C_albicans_SC5314	805210	Ca21chr2_C_albicans_SC5314	803040	Ca21chr2_C_albicans_SC5314805210	Ca21chr2_C_albicans_SC5314803040				Ca21chr2_C_albicans_SC5314805210			FALSE
Ca21chr2_C_albicans_SC5314	805211	Ca21chr2_C_albicans_SC5314	803088	Ca21chr2_C_albicans_SC5314805211	Ca21chr2_C_albicans_SC5314803088				Ca21chr2_C_albicans_SC5314805211			FALSE
Ca21chr2_C_albicans_SC5314	805290	Ca21chr2_C_albicans_SC5314	803137	Ca21chr2_C_albicans_SC5314805290	Ca21chr2_C_albicans_SC5314803137				Ca21chr2_C_albicans_SC5314805290			FALSE
Ca21chr2_C_albicans_SC5314	812415	Ca21chr2_C_albicans_SC5314	803160	Ca21chr2_C_albicans_SC5314812415	Ca21chr2_C_albicans_SC5314803160				Ca21chr2_C_albicans_SC5314812415			FALSE
Ca21chr2_C_albicans_SC5314	812588	Ca21chr2_C_albicans_SC5314	803217	Ca21chr2_C_albicans_SC5314812588	Ca21chr2_C_albicans_SC5314803217				Ca21chr2_C_albicans_SC5314812588			FALSE
Ca21chr2_C_albicans_SC5314	812712	Ca21chr2_C_albicans_SC5314	803229	Ca21chr2_C_albicans_SC5314812712	Ca21chr2_C_albicans_SC5314803229				Ca21chr2_C_albicans_SC5314812712			FALSE
Ca21chr2_C_albicans_SC5314	812850	Ca21chr2_C_albicans_SC5314	803244	Ca21chr2_C_albicans_SC5314812850	Ca21chr2_C_albicans_SC5314803244				Ca21chr2_C_albicans_SC5314812850			FALSE
Ca21chr2_C_albicans_SC5314	812963	Ca21chr2_C_albicans_SC5314	803262	Ca21chr2_C_albicans_SC5314812963	Ca21chr2_C_albicans_SC5314803262				Ca21chr2_C_albicans_SC5314812963			FALSE
Ca21chr2_C_albicans_SC5314	812964	Ca21chr2_C_albicans_SC5314	803334	Ca21chr2_C_albicans_SC5314812964	Ca21chr2_C_albicans_SC5314803334				Ca21chr2_C_albicans_SC5314812964			FALSE
Ca21chr2_C_albicans_SC5314	812974	Ca21chr2_C_albicans_SC5314	803475	Ca21chr2_C_albicans_SC5314812974	Ca21chr2_C_albicans_SC5314803475				Ca21chr2_C_albicans_SC5314812974			FALSE
Ca21chr2_C_albicans_SC5314	813060	Ca21chr2_C_albicans_SC5314	803529	Ca21chr2_C_albicans_SC5314813060	Ca21chr2_C_albicans_SC5314803529				Ca21chr2_C_albicans_SC5314813060			FALSE
Ca21chr2_C_albicans_SC5314	813061	Ca21chr2_C_albicans_SC5314	803538	Ca21chr2_C_albicans_SC5314813061	Ca21chr2_C_albicans_SC5314803538				Ca21chr2_C_albicans_SC5314813061			FALSE
Ca21chr2_C_albicans_SC5314	813123	Ca21chr2_C_albicans_SC5314	803553	Ca21chr2_C_albicans_SC5314813123	Ca21chr2_C_albicans_SC5314803553				Ca21chr2_C_albicans_SC5314813123			FALSE
Ca21chr2_C_albicans_SC5314	813129	Ca21chr2_C_albicans_SC5314	803565	Ca21chr2_C_albicans_SC5314813129	Ca21chr2_C_albicans_SC5314803565				Ca21chr2_C_albicans_SC5314813129			FALSE
Ca21chr2_C_albicans_SC5314	813180	Ca21chr2_C_albicans_SC5314	803628	Ca21chr2_C_albicans_SC5314813180	Ca21chr2_C_albicans_SC5314803628				Ca21chr2_C_albicans_SC5314813180			FALSE
Ca21chr2_C_albicans_SC5314	813284	Ca21chr2_C_albicans_SC5314	803697	Ca21chr2_C_albicans_SC5314813284	Ca21chr2_C_albicans_SC5314803697				Ca21chr2_C_albicans_SC5314813284			FALSE
Ca21chr2_C_albicans_SC5314	813774	Ca21chr2_C_albicans_SC5314	803705	Ca21chr2_C_albicans_SC5314813774	Ca21chr2_C_albicans_SC5314803705				Ca21chr2_C_albicans_SC5314813774			FALSE
Ca21chr2_C_albicans_SC5314	813789	Ca21chr2_C_albicans_SC5314	803712	Ca21chr2_C_albicans_SC5314813789	Ca21chr2_C_albicans_SC5314803712				Ca21chr2_C_albicans_SC5314813789			FALSE
Ca21chr2_C_albicans_SC5314	813915	Ca21chr2_C_albicans_SC5314	803727	Ca21chr2_C_albicans_SC5314813915	Ca21chr2_C_albicans_SC5314803727				Ca21chr2_C_albicans_SC5314813915			FALSE
Ca21chr2_C_albicans_SC5314	814092	Ca21chr2_C_albicans_SC5314	804841	Ca21chr2_C_albicans_SC5314814092	Ca21chr2_C_albicans_SC5314804841				Ca21chr2_C_albicans_SC5314814092			FALSE
Ca21chr2_C_albicans_SC5314	814107	Ca21chr2_C_albicans_SC5314	804844	Ca21chr2_C_albicans_SC5314814107	Ca21chr2_C_albicans_SC5314804844				Ca21chr2_C_albicans_SC5314814107			FALSE
Ca21chr2_C_albicans_SC5314	814112	Ca21chr2_C_albicans_SC5314	805006	Ca21chr2_C_albicans_SC5314814112	Ca21chr2_C_albicans_SC5314805006				Ca21chr2_C_albicans_SC5314814112			FALSE
Ca21chr2_C_albicans_SC5314	814881	Ca21chr2_C_albicans_SC5314	805138	Ca21chr2_C_albicans_SC5314814881	Ca21chr2_C_albicans_SC5314805138				Ca21chr2_C_albicans_SC5314814881			FALSE
Ca21chr2_C_albicans_SC5314	814983	Ca21chr2_C_albicans_SC5314	805208	Ca21chr2_C_albicans_SC5314814983	Ca21chr2_C_albicans_SC5314805208				Ca21chr2_C_albicans_SC5314814983			FALSE
Ca21chr2_C_albicans_SC5314	815091	Ca21chr2_C_albicans_SC5314	805210	Ca21chr2_C_albicans_SC5314815091	Ca21chr2_C_albicans_SC5314805210				Ca21chr2_C_albicans_SC5314815091			FALSE
Ca21chr2_C_albicans_SC5314	815625	Ca21chr2_C_albicans_SC5314	805211	Ca21chr2_C_albicans_SC5314815625	Ca21chr2_C_albicans_SC5314805211				Ca21chr2_C_albicans_SC5314815625			FALSE
Ca21chr2_C_albicans_SC5314	815643	Ca21chr2_C_albicans_SC5314	805290	Ca21chr2_C_albicans_SC5314815643	Ca21chr2_C_albicans_SC5314805290				Ca21chr2_C_albicans_SC5314815643			FALSE
Ca21chr2_C_albicans_SC5314	815683	Ca21chr2_C_albicans_SC5314	812415	Ca21chr2_C_albicans_SC5314815683	Ca21chr2_C_albicans_SC5314812415				Ca21chr2_C_albicans_SC5314815683			FALSE
Ca21chr2_C_albicans_SC5314	815685	Ca21chr2_C_albicans_SC5314	812588	Ca21chr2_C_albicans_SC5314815685	Ca21chr2_C_albicans_SC5314812588				Ca21chr2_C_albicans_SC5314815685			FALSE
Ca21chr2_C_albicans_SC5314	815687	Ca21chr2_C_albicans_SC5314	812712	Ca21chr2_C_albicans_SC5314815687	Ca21chr2_C_albicans_SC5314812712				Ca21chr2_C_albicans_SC5314815687			FALSE
Ca21chr2_C_albicans_SC5314	815702	Ca21chr2_C_albicans_SC5314	812850	Ca21chr2_C_albicans_SC5314815702	Ca21chr2_C_albicans_SC5314812850				Ca21chr2_C_albicans_SC5314815702			FALSE
Ca21chr2_C_albicans_SC5314	816482	Ca21chr2_C_albicans_SC5314	812963	Ca21chr2_C_albicans_SC5314816482	Ca21chr2_C_albicans_SC5314812963				Ca21chr2_C_albicans_SC5314816482			FALSE
Ca21chr2_C_albicans_SC5314	816531	Ca21chr2_C_albicans_SC5314	812964	Ca21chr2_C_albicans_SC5314816531	Ca21chr2_C_albicans_SC5314812964				Ca21chr2_C_albicans_SC5314816531			FALSE
Ca21chr2_C_albicans_SC5314	816564	Ca21chr2_C_albicans_SC5314	812974	Ca21chr2_C_albicans_SC5314816564	Ca21chr2_C_albicans_SC5314812974				Ca21chr2_C_albicans_SC5314816564			FALSE
Ca21chr2_C_albicans_SC5314	817059	Ca21chr2_C_albicans_SC5314	813060	Ca21chr2_C_albicans_SC5314817059	Ca21chr2_C_albicans_SC5314813060				Ca21chr2_C_albicans_SC5314817059			FALSE
Ca21chr2_C_albicans_SC5314	818154	Ca21chr2_C_albicans_SC5314	813061	Ca21chr2_C_albicans_SC5314818154	Ca21chr2_C_albicans_SC5314813061				Ca21chr2_C_albicans_SC5314818154			FALSE
Ca21chr2_C_albicans_SC5314	819405	Ca21chr2_C_albicans_SC5314	813123	Ca21chr2_C_albicans_SC5314819405	Ca21chr2_C_albicans_SC5314813123				Ca21chr2_C_albicans_SC5314819405			FALSE
Ca21chr2_C_albicans_SC5314	819942	Ca21chr2_C_albicans_SC5314	813129	Ca21chr2_C_albicans_SC5314819942	Ca21chr2_C_albicans_SC5314813129				Ca21chr2_C_albicans_SC5314819942			FALSE
Ca21chr2_C_albicans_SC5314	820325	Ca21chr2_C_albicans_SC5314	813180	Ca21chr2_C_albicans_SC5314820325	Ca21chr2_C_albicans_SC5314813180				Ca21chr2_C_albicans_SC5314820325			FALSE
Ca21chr2_C_albicans_SC5314	820410	Ca21chr2_C_albicans_SC5314	813284	Ca21chr2_C_albicans_SC5314820410	Ca21chr2_C_albicans_SC5314813284				Ca21chr2_C_albicans_SC5314820410			FALSE
Ca21chr2_C_albicans_SC5314	821187	Ca21chr2_C_albicans_SC5314	813774	Ca21chr2_C_albicans_SC5314821187	Ca21chr2_C_albicans_SC5314813774				Ca21chr2_C_albicans_SC5314821187			FALSE
Ca21chr2_C_albicans_SC5314	823440	Ca21chr2_C_albicans_SC5314	813789	Ca21chr2_C_albicans_SC5314823440	Ca21chr2_C_albicans_SC5314813789				Ca21chr2_C_albicans_SC5314823440			FALSE
Ca21chr2_C_albicans_SC5314	823464	Ca21chr2_C_albicans_SC5314	813915	Ca21chr2_C_albicans_SC5314823464	Ca21chr2_C_albicans_SC5314813915				Ca21chr2_C_albicans_SC5314823464			FALSE
Ca21chr2_C_albicans_SC5314	823500	Ca21chr2_C_albicans_SC5314	814092	Ca21chr2_C_albicans_SC5314823500	Ca21chr2_C_albicans_SC5314814092				Ca21chr2_C_albicans_SC5314823500			FALSE
Ca21chr2_C_albicans_SC5314	824045	Ca21chr2_C_albicans_SC5314	814107	Ca21chr2_C_albicans_SC5314824045	Ca21chr2_C_albicans_SC5314814107				Ca21chr2_C_albicans_SC5314824045			FALSE
Ca21chr2_C_albicans_SC5314	824109	Ca21chr2_C_albicans_SC5314	814112	Ca21chr2_C_albicans_SC5314824109	Ca21chr2_C_albicans_SC5314814112				Ca21chr2_C_albicans_SC5314824109			FALSE
Ca21chr2_C_albicans_SC5314	824313	Ca21chr2_C_albicans_SC5314	814881	Ca21chr2_C_albicans_SC5314824313	Ca21chr2_C_albicans_SC5314814881				Ca21chr2_C_albicans_SC5314824313			FALSE
Ca21chr2_C_albicans_SC5314	824328	Ca21chr2_C_albicans_SC5314	814983	Ca21chr2_C_albicans_SC5314824328	Ca21chr2_C_albicans_SC5314814983				Ca21chr2_C_albicans_SC5314824328			FALSE
Ca21chr2_C_albicans_SC5314	825788	Ca21chr2_C_albicans_SC5314	815091	Ca21chr2_C_albicans_SC5314825788	Ca21chr2_C_albicans_SC5314815091				Ca21chr2_C_albicans_SC5314825788			FALSE
Ca21chr2_C_albicans_SC5314	826070	Ca21chr2_C_albicans_SC5314	815625	Ca21chr2_C_albicans_SC5314826070	Ca21chr2_C_albicans_SC5314815625				Ca21chr2_C_albicans_SC5314826070			FALSE
Ca21chr2_C_albicans_SC5314	826073	Ca21chr2_C_albicans_SC5314	815643	Ca21chr2_C_albicans_SC5314826073	Ca21chr2_C_albicans_SC5314815643				Ca21chr2_C_albicans_SC5314826073			FALSE
Ca21chr2_C_albicans_SC5314	826208	Ca21chr2_C_albicans_SC5314	815683	Ca21chr2_C_albicans_SC5314826208	Ca21chr2_C_albicans_SC5314815683				Ca21chr2_C_albicans_SC5314826208			FALSE
Ca21chr2_C_albicans_SC5314	827832	Ca21chr2_C_albicans_SC5314	815685	Ca21chr2_C_albicans_SC5314827832	Ca21chr2_C_albicans_SC5314815685				Ca21chr2_C_albicans_SC5314827832			FALSE
Ca21chr2_C_albicans_SC5314	830548	Ca21chr2_C_albicans_SC5314	815687	Ca21chr2_C_albicans_SC5314830548	Ca21chr2_C_albicans_SC5314815687				Ca21chr2_C_albicans_SC5314830548			FALSE
Ca21chr2_C_albicans_SC5314	833283	Ca21chr2_C_albicans_SC5314	815702	Ca21chr2_C_albicans_SC5314833283	Ca21chr2_C_albicans_SC5314815702				Ca21chr2_C_albicans_SC5314833283			FALSE
Ca21chr2_C_albicans_SC5314	836984	Ca21chr2_C_albicans_SC5314	816482	Ca21chr2_C_albicans_SC5314836984	Ca21chr2_C_albicans_SC5314816482				Ca21chr2_C_albicans_SC5314836984			FALSE
Ca21chr2_C_albicans_SC5314	837151	Ca21chr2_C_albicans_SC5314	816531	Ca21chr2_C_albicans_SC5314837151	Ca21chr2_C_albicans_SC5314816531				Ca21chr2_C_albicans_SC5314837151			FALSE
Ca21chr2_C_albicans_SC5314	837591	Ca21chr2_C_albicans_SC5314	816564	Ca21chr2_C_albicans_SC5314837591	Ca21chr2_C_albicans_SC5314816564				Ca21chr2_C_albicans_SC5314837591			FALSE
Ca21chr2_C_albicans_SC5314	838227	Ca21chr2_C_albicans_SC5314	817059	Ca21chr2_C_albicans_SC5314838227	Ca21chr2_C_albicans_SC5314817059				Ca21chr2_C_albicans_SC5314838227			FALSE
Ca21chr2_C_albicans_SC5314	838251	Ca21chr2_C_albicans_SC5314	818154	Ca21chr2_C_albicans_SC5314838251	Ca21chr2_C_albicans_SC5314818154				Ca21chr2_C_albicans_SC5314838251			FALSE
Ca21chr2_C_albicans_SC5314	838293	Ca21chr2_C_albicans_SC5314	819405	Ca21chr2_C_albicans_SC5314838293	Ca21chr2_C_albicans_SC5314819405				Ca21chr2_C_albicans_SC5314838293			FALSE
Ca21chr2_C_albicans_SC5314	838455	Ca21chr2_C_albicans_SC5314	819942	Ca21chr2_C_albicans_SC5314838455	Ca21chr2_C_albicans_SC5314819942				Ca21chr2_C_albicans_SC5314838455			FALSE
Ca21chr2_C_albicans_SC5314	842359	Ca21chr2_C_albicans_SC5314	820325	Ca21chr2_C_albicans_SC5314842359	Ca21chr2_C_albicans_SC5314820325				Ca21chr2_C_albicans_SC5314842359			FALSE
Ca21chr2_C_albicans_SC5314	843370	Ca21chr2_C_albicans_SC5314	820410	Ca21chr2_C_albicans_SC5314843370	Ca21chr2_C_albicans_SC5314820410				Ca21chr2_C_albicans_SC5314843370			FALSE
Ca21chr2_C_albicans_SC5314	843406	Ca21chr2_C_albicans_SC5314	821187	Ca21chr2_C_albicans_SC5314843406	Ca21chr2_C_albicans_SC5314821187				Ca21chr2_C_albicans_SC5314843406			FALSE
Ca21chr2_C_albicans_SC5314	843562	Ca21chr2_C_albicans_SC5314	823440	Ca21chr2_C_albicans_SC5314843562	Ca21chr2_C_albicans_SC5314823440				Ca21chr2_C_albicans_SC5314843562			FALSE
Ca21chr2_C_albicans_SC5314	844831	Ca21chr2_C_albicans_SC5314	823464	Ca21chr2_C_albicans_SC5314844831	Ca21chr2_C_albicans_SC5314823464				Ca21chr2_C_albicans_SC5314844831			FALSE
Ca21chr2_C_albicans_SC5314	844873	Ca21chr2_C_albicans_SC5314	823500	Ca21chr2_C_albicans_SC5314844873	Ca21chr2_C_albicans_SC5314823500				Ca21chr2_C_albicans_SC5314844873			FALSE
Ca21chr2_C_albicans_SC5314	845008	Ca21chr2_C_albicans_SC5314	824045	Ca21chr2_C_albicans_SC5314845008	Ca21chr2_C_albicans_SC5314824045				Ca21chr2_C_albicans_SC5314845008			FALSE
Ca21chr2_C_albicans_SC5314	845083	Ca21chr2_C_albicans_SC5314	824109	Ca21chr2_C_albicans_SC5314845083	Ca21chr2_C_albicans_SC5314824109				Ca21chr2_C_albicans_SC5314845083			FALSE
Ca21chr2_C_albicans_SC5314	845090	Ca21chr2_C_albicans_SC5314	824313	Ca21chr2_C_albicans_SC5314845090	Ca21chr2_C_albicans_SC5314824313				Ca21chr2_C_albicans_SC5314845090			FALSE
Ca21chr2_C_albicans_SC5314	845158	Ca21chr2_C_albicans_SC5314	824328	Ca21chr2_C_albicans_SC5314845158	Ca21chr2_C_albicans_SC5314824328				Ca21chr2_C_albicans_SC5314845158			FALSE
Ca21chr2_C_albicans_SC5314	845299	Ca21chr2_C_albicans_SC5314	825788	Ca21chr2_C_albicans_SC5314845299	Ca21chr2_C_albicans_SC5314825788				Ca21chr2_C_albicans_SC5314845299			FALSE
Ca21chr2_C_albicans_SC5314	845410	Ca21chr2_C_albicans_SC5314	826070	Ca21chr2_C_albicans_SC5314845410	Ca21chr2_C_albicans_SC5314826070				Ca21chr2_C_albicans_SC5314845410			FALSE
Ca21chr2_C_albicans_SC5314	845475	Ca21chr2_C_albicans_SC5314	826073	Ca21chr2_C_albicans_SC5314845475	Ca21chr2_C_albicans_SC5314826073				Ca21chr2_C_albicans_SC5314845475			FALSE
Ca21chr2_C_albicans_SC5314	848126	Ca21chr2_C_albicans_SC5314	826208	Ca21chr2_C_albicans_SC5314848126	Ca21chr2_C_albicans_SC5314826208				Ca21chr2_C_albicans_SC5314848126			FALSE
Ca21chr2_C_albicans_SC5314	861241	Ca21chr2_C_albicans_SC5314	827832	Ca21chr2_C_albicans_SC5314861241	Ca21chr2_C_albicans_SC5314827832				Ca21chr2_C_albicans_SC5314861241			FALSE
Ca21chr2_C_albicans_SC5314	862198	Ca21chr2_C_albicans_SC5314	830548	Ca21chr2_C_albicans_SC5314862198	Ca21chr2_C_albicans_SC5314830548				Ca21chr2_C_albicans_SC5314862198			FALSE
Ca21chr2_C_albicans_SC5314	862202	Ca21chr2_C_albicans_SC5314	833283	Ca21chr2_C_albicans_SC5314862202	Ca21chr2_C_albicans_SC5314833283				Ca21chr2_C_albicans_SC5314862202			FALSE
Ca21chr2_C_albicans_SC5314	862204	Ca21chr2_C_albicans_SC5314	836984	Ca21chr2_C_albicans_SC5314862204	Ca21chr2_C_albicans_SC5314836984				Ca21chr2_C_albicans_SC5314862204			FALSE
Ca21chr2_C_albicans_SC5314	862207	Ca21chr2_C_albicans_SC5314	837151	Ca21chr2_C_albicans_SC5314862207	Ca21chr2_C_albicans_SC5314837151				Ca21chr2_C_albicans_SC5314862207			FALSE
Ca21chr2_C_albicans_SC5314	862324	Ca21chr2_C_albicans_SC5314	837591	Ca21chr2_C_albicans_SC5314862324	Ca21chr2_C_albicans_SC5314837591				Ca21chr2_C_albicans_SC5314862324			FALSE
Ca21chr2_C_albicans_SC5314	862378	Ca21chr2_C_albicans_SC5314	838227	Ca21chr2_C_albicans_SC5314862378	Ca21chr2_C_albicans_SC5314838227				Ca21chr2_C_albicans_SC5314862378			FALSE
Ca21chr2_C_albicans_SC5314	862414	Ca21chr2_C_albicans_SC5314	838251	Ca21chr2_C_albicans_SC5314862414	Ca21chr2_C_albicans_SC5314838251				Ca21chr2_C_albicans_SC5314862414			FALSE
Ca21chr2_C_albicans_SC5314	862641	Ca21chr2_C_albicans_SC5314	838293	Ca21chr2_C_albicans_SC5314862641	Ca21chr2_C_albicans_SC5314838293				Ca21chr2_C_albicans_SC5314862641			FALSE
Ca21chr2_C_albicans_SC5314	862982	Ca21chr2_C_albicans_SC5314	838455	Ca21chr2_C_albicans_SC5314862982	Ca21chr2_C_albicans_SC5314838455				Ca21chr2_C_albicans_SC5314862982			FALSE
Ca21chr2_C_albicans_SC5314	863031	Ca21chr2_C_albicans_SC5314	842359	Ca21chr2_C_albicans_SC5314863031	Ca21chr2_C_albicans_SC5314842359				Ca21chr2_C_albicans_SC5314863031			FALSE
Ca21chr2_C_albicans_SC5314	863411	Ca21chr2_C_albicans_SC5314	843370	Ca21chr2_C_albicans_SC5314863411	Ca21chr2_C_albicans_SC5314843370				Ca21chr2_C_albicans_SC5314863411			FALSE
Ca21chr2_C_albicans_SC5314	864763	Ca21chr2_C_albicans_SC5314	843406	Ca21chr2_C_albicans_SC5314864763	Ca21chr2_C_albicans_SC5314843406				Ca21chr2_C_albicans_SC5314864763			FALSE
Ca21chr2_C_albicans_SC5314	865028	Ca21chr2_C_albicans_SC5314	843562	Ca21chr2_C_albicans_SC5314865028	Ca21chr2_C_albicans_SC5314843562				Ca21chr2_C_albicans_SC5314865028			FALSE
Ca21chr2_C_albicans_SC5314	865079	Ca21chr2_C_albicans_SC5314	844831	Ca21chr2_C_albicans_SC5314865079	Ca21chr2_C_albicans_SC5314844831				Ca21chr2_C_albicans_SC5314865079			FALSE
Ca21chr2_C_albicans_SC5314	865097	Ca21chr2_C_albicans_SC5314	844873	Ca21chr2_C_albicans_SC5314865097	Ca21chr2_C_albicans_SC5314844873				Ca21chr2_C_albicans_SC5314865097			FALSE
Ca21chr2_C_albicans_SC5314	865106	Ca21chr2_C_albicans_SC5314	845008	Ca21chr2_C_albicans_SC5314865106	Ca21chr2_C_albicans_SC5314845008				Ca21chr2_C_albicans_SC5314865106			FALSE
Ca21chr2_C_albicans_SC5314	865117	Ca21chr2_C_albicans_SC5314	845083	Ca21chr2_C_albicans_SC5314865117	Ca21chr2_C_albicans_SC5314845083				Ca21chr2_C_albicans_SC5314865117			FALSE
Ca21chr2_C_albicans_SC5314	865232	Ca21chr2_C_albicans_SC5314	845090	Ca21chr2_C_albicans_SC5314865232	Ca21chr2_C_albicans_SC5314845090				Ca21chr2_C_albicans_SC5314865232			FALSE
Ca21chr2_C_albicans_SC5314	865235	Ca21chr2_C_albicans_SC5314	845158	Ca21chr2_C_albicans_SC5314865235	Ca21chr2_C_albicans_SC5314845158				Ca21chr2_C_albicans_SC5314865235			FALSE
Ca21chr2_C_albicans_SC5314	865409	Ca21chr2_C_albicans_SC5314	845299	Ca21chr2_C_albicans_SC5314865409	Ca21chr2_C_albicans_SC5314845299				Ca21chr2_C_albicans_SC5314865409			FALSE
Ca21chr2_C_albicans_SC5314	865410	Ca21chr2_C_albicans_SC5314	845410	Ca21chr2_C_albicans_SC5314865410	Ca21chr2_C_albicans_SC5314845410				Ca21chr2_C_albicans_SC5314865410			FALSE
Ca21chr2_C_albicans_SC5314	865562	Ca21chr2_C_albicans_SC5314	845475	Ca21chr2_C_albicans_SC5314865562	Ca21chr2_C_albicans_SC5314845475				Ca21chr2_C_albicans_SC5314865562			FALSE
Ca21chr2_C_albicans_SC5314	865874	Ca21chr2_C_albicans_SC5314	848126	Ca21chr2_C_albicans_SC5314865874	Ca21chr2_C_albicans_SC5314848126				Ca21chr2_C_albicans_SC5314865874			FALSE
Ca21chr2_C_albicans_SC5314	867566	Ca21chr2_C_albicans_SC5314	861241	Ca21chr2_C_albicans_SC5314867566	Ca21chr2_C_albicans_SC5314861241				Ca21chr2_C_albicans_SC5314867566			FALSE
Ca21chr2_C_albicans_SC5314	867656	Ca21chr2_C_albicans_SC5314	862198	Ca21chr2_C_albicans_SC5314867656	Ca21chr2_C_albicans_SC5314862198				Ca21chr2_C_albicans_SC5314867656			FALSE
Ca21chr2_C_albicans_SC5314	867657	Ca21chr2_C_albicans_SC5314	862202	Ca21chr2_C_albicans_SC5314867657	Ca21chr2_C_albicans_SC5314862202				Ca21chr2_C_albicans_SC5314867657			FALSE
Ca21chr2_C_albicans_SC5314	867721	Ca21chr2_C_albicans_SC5314	862204	Ca21chr2_C_albicans_SC5314867721	Ca21chr2_C_albicans_SC5314862204				Ca21chr2_C_albicans_SC5314867721			FALSE
Ca21chr2_C_albicans_SC5314	867785	Ca21chr2_C_albicans_SC5314	862207	Ca21chr2_C_albicans_SC5314867785	Ca21chr2_C_albicans_SC5314862207				Ca21chr2_C_albicans_SC5314867785			FALSE
Ca21chr2_C_albicans_SC5314	867786	Ca21chr2_C_albicans_SC5314	862324	Ca21chr2_C_albicans_SC5314867786	Ca21chr2_C_albicans_SC5314862324				Ca21chr2_C_albicans_SC5314867786			FALSE
Ca21chr2_C_albicans_SC5314	867803	Ca21chr2_C_albicans_SC5314	862378	Ca21chr2_C_albicans_SC5314867803	Ca21chr2_C_albicans_SC5314862378				Ca21chr2_C_albicans_SC5314867803			FALSE
Ca21chr2_C_albicans_SC5314	867825	Ca21chr2_C_albicans_SC5314	862414	Ca21chr2_C_albicans_SC5314867825	Ca21chr2_C_albicans_SC5314862414				Ca21chr2_C_albicans_SC5314867825			FALSE
Ca21chr2_C_albicans_SC5314	867834	Ca21chr2_C_albicans_SC5314	862641	Ca21chr2_C_albicans_SC5314867834	Ca21chr2_C_albicans_SC5314862641				Ca21chr2_C_albicans_SC5314867834			FALSE
Ca21chr2_C_albicans_SC5314	868013	Ca21chr2_C_albicans_SC5314	862982	Ca21chr2_C_albicans_SC5314868013	Ca21chr2_C_albicans_SC5314862982				Ca21chr2_C_albicans_SC5314868013			FALSE
Ca21chr2_C_albicans_SC5314	868094	Ca21chr2_C_albicans_SC5314	863031	Ca21chr2_C_albicans_SC5314868094	Ca21chr2_C_albicans_SC5314863031				Ca21chr2_C_albicans_SC5314868094			FALSE
Ca21chr2_C_albicans_SC5314	869177	Ca21chr2_C_albicans_SC5314	863411	Ca21chr2_C_albicans_SC5314869177	Ca21chr2_C_albicans_SC5314863411				Ca21chr2_C_albicans_SC5314869177			FALSE
Ca21chr2_C_albicans_SC5314	869197	Ca21chr2_C_albicans_SC5314	864763	Ca21chr2_C_albicans_SC5314869197	Ca21chr2_C_albicans_SC5314864763				Ca21chr2_C_albicans_SC5314869197			FALSE
Ca21chr2_C_albicans_SC5314	869214	Ca21chr2_C_albicans_SC5314	865028	Ca21chr2_C_albicans_SC5314869214	Ca21chr2_C_albicans_SC5314865028				Ca21chr2_C_albicans_SC5314869214			FALSE
Ca21chr2_C_albicans_SC5314	869321	Ca21chr2_C_albicans_SC5314	865079	Ca21chr2_C_albicans_SC5314869321	Ca21chr2_C_albicans_SC5314865079				Ca21chr2_C_albicans_SC5314869321			FALSE
Ca21chr2_C_albicans_SC5314	869399	Ca21chr2_C_albicans_SC5314	865097	Ca21chr2_C_albicans_SC5314869399	Ca21chr2_C_albicans_SC5314865097				Ca21chr2_C_albicans_SC5314869399			FALSE
Ca21chr2_C_albicans_SC5314	869413	Ca21chr2_C_albicans_SC5314	865106	Ca21chr2_C_albicans_SC5314869413	Ca21chr2_C_albicans_SC5314865106				Ca21chr2_C_albicans_SC5314869413			FALSE
Ca21chr2_C_albicans_SC5314	869496	Ca21chr2_C_albicans_SC5314	865117	Ca21chr2_C_albicans_SC5314869496	Ca21chr2_C_albicans_SC5314865117				Ca21chr2_C_albicans_SC5314869496			FALSE
Ca21chr2_C_albicans_SC5314	878176	Ca21chr2_C_albicans_SC5314	865232	Ca21chr2_C_albicans_SC5314878176	Ca21chr2_C_albicans_SC5314865232				Ca21chr2_C_albicans_SC5314878176			FALSE
Ca21chr2_C_albicans_SC5314	878179	Ca21chr2_C_albicans_SC5314	865235	Ca21chr2_C_albicans_SC5314878179	Ca21chr2_C_albicans_SC5314865235				Ca21chr2_C_albicans_SC5314878179			FALSE
Ca21chr2_C_albicans_SC5314	878191	Ca21chr2_C_albicans_SC5314	865409	Ca21chr2_C_albicans_SC5314878191	Ca21chr2_C_albicans_SC5314865409				Ca21chr2_C_albicans_SC5314878191			FALSE
Ca21chr2_C_albicans_SC5314	878729	Ca21chr2_C_albicans_SC5314	865410	Ca21chr2_C_albicans_SC5314878729	Ca21chr2_C_albicans_SC5314865410				Ca21chr2_C_albicans_SC5314878729			FALSE
Ca21chr2_C_albicans_SC5314	878741	Ca21chr2_C_albicans_SC5314	865562	Ca21chr2_C_albicans_SC5314878741	Ca21chr2_C_albicans_SC5314865562				Ca21chr2_C_albicans_SC5314878741			FALSE
Ca21chr2_C_albicans_SC5314	878799	Ca21chr2_C_albicans_SC5314	865874	Ca21chr2_C_albicans_SC5314878799	Ca21chr2_C_albicans_SC5314865874				Ca21chr2_C_albicans_SC5314878799			FALSE
Ca21chr2_C_albicans_SC5314	878864	Ca21chr2_C_albicans_SC5314	867566	Ca21chr2_C_albicans_SC5314878864	Ca21chr2_C_albicans_SC5314867566				Ca21chr2_C_albicans_SC5314878864			FALSE
Ca21chr2_C_albicans_SC5314	879005	Ca21chr2_C_albicans_SC5314	867656	Ca21chr2_C_albicans_SC5314879005	Ca21chr2_C_albicans_SC5314867656				Ca21chr2_C_albicans_SC5314879005			FALSE
Ca21chr2_C_albicans_SC5314	879227	Ca21chr2_C_albicans_SC5314	867657	Ca21chr2_C_albicans_SC5314879227	Ca21chr2_C_albicans_SC5314867657				Ca21chr2_C_albicans_SC5314879227			FALSE
Ca21chr2_C_albicans_SC5314	879230	Ca21chr2_C_albicans_SC5314	867721	Ca21chr2_C_albicans_SC5314879230	Ca21chr2_C_albicans_SC5314867721				Ca21chr2_C_albicans_SC5314879230			FALSE
Ca21chr2_C_albicans_SC5314	879242	Ca21chr2_C_albicans_SC5314	867785	Ca21chr2_C_albicans_SC5314879242	Ca21chr2_C_albicans_SC5314867785				Ca21chr2_C_albicans_SC5314879242			FALSE
Ca21chr2_C_albicans_SC5314	879266	Ca21chr2_C_albicans_SC5314	867786	Ca21chr2_C_albicans_SC5314879266	Ca21chr2_C_albicans_SC5314867786				Ca21chr2_C_albicans_SC5314879266			FALSE
Ca21chr2_C_albicans_SC5314	879299	Ca21chr2_C_albicans_SC5314	867803	Ca21chr2_C_albicans_SC5314879299	Ca21chr2_C_albicans_SC5314867803				Ca21chr2_C_albicans_SC5314879299			FALSE
Ca21chr2_C_albicans_SC5314	879392	Ca21chr2_C_albicans_SC5314	867825	Ca21chr2_C_albicans_SC5314879392	Ca21chr2_C_albicans_SC5314867825				Ca21chr2_C_albicans_SC5314879392			FALSE
Ca21chr2_C_albicans_SC5314	879398	Ca21chr2_C_albicans_SC5314	867834	Ca21chr2_C_albicans_SC5314879398	Ca21chr2_C_albicans_SC5314867834				Ca21chr2_C_albicans_SC5314879398			FALSE
Ca21chr2_C_albicans_SC5314	879434	Ca21chr2_C_albicans_SC5314	868013	Ca21chr2_C_albicans_SC5314879434	Ca21chr2_C_albicans_SC5314868013				Ca21chr2_C_albicans_SC5314879434			FALSE
Ca21chr2_C_albicans_SC5314	879611	Ca21chr2_C_albicans_SC5314	868094	Ca21chr2_C_albicans_SC5314879611	Ca21chr2_C_albicans_SC5314868094				Ca21chr2_C_albicans_SC5314879611			FALSE
Ca21chr2_C_albicans_SC5314	879938	Ca21chr2_C_albicans_SC5314	869177	Ca21chr2_C_albicans_SC5314879938	Ca21chr2_C_albicans_SC5314869177				Ca21chr2_C_albicans_SC5314879938			FALSE
Ca21chr2_C_albicans_SC5314	879965	Ca21chr2_C_albicans_SC5314	869197	Ca21chr2_C_albicans_SC5314879965	Ca21chr2_C_albicans_SC5314869197				Ca21chr2_C_albicans_SC5314879965			FALSE
Ca21chr2_C_albicans_SC5314	881050	Ca21chr2_C_albicans_SC5314	869214	Ca21chr2_C_albicans_SC5314881050	Ca21chr2_C_albicans_SC5314869214				Ca21chr2_C_albicans_SC5314881050			FALSE
Ca21chr2_C_albicans_SC5314	881056	Ca21chr2_C_albicans_SC5314	869321	Ca21chr2_C_albicans_SC5314881056	Ca21chr2_C_albicans_SC5314869321				Ca21chr2_C_albicans_SC5314881056			FALSE
Ca21chr2_C_albicans_SC5314	881060	Ca21chr2_C_albicans_SC5314	869399	Ca21chr2_C_albicans_SC5314881060	Ca21chr2_C_albicans_SC5314869399				Ca21chr2_C_albicans_SC5314881060			FALSE
Ca21chr2_C_albicans_SC5314	881062	Ca21chr2_C_albicans_SC5314	869413	Ca21chr2_C_albicans_SC5314881062	Ca21chr2_C_albicans_SC5314869413				Ca21chr2_C_albicans_SC5314881062			FALSE
Ca21chr2_C_albicans_SC5314	881063	Ca21chr2_C_albicans_SC5314	869496	Ca21chr2_C_albicans_SC5314881063	Ca21chr2_C_albicans_SC5314869496				Ca21chr2_C_albicans_SC5314881063			FALSE
Ca21chr2_C_albicans_SC5314	881077	Ca21chr2_C_albicans_SC5314	878176	Ca21chr2_C_albicans_SC5314881077	Ca21chr2_C_albicans_SC5314878176				Ca21chr2_C_albicans_SC5314881077			FALSE
Ca21chr2_C_albicans_SC5314	881157	Ca21chr2_C_albicans_SC5314	878179	Ca21chr2_C_albicans_SC5314881157	Ca21chr2_C_albicans_SC5314878179				Ca21chr2_C_albicans_SC5314881157			FALSE
Ca21chr2_C_albicans_SC5314	881215	Ca21chr2_C_albicans_SC5314	878191	Ca21chr2_C_albicans_SC5314881215	Ca21chr2_C_albicans_SC5314878191				Ca21chr2_C_albicans_SC5314881215			FALSE
Ca21chr2_C_albicans_SC5314	881333	Ca21chr2_C_albicans_SC5314	878729	Ca21chr2_C_albicans_SC5314881333	Ca21chr2_C_albicans_SC5314878729				Ca21chr2_C_albicans_SC5314881333			FALSE
Ca21chr2_C_albicans_SC5314	881460	Ca21chr2_C_albicans_SC5314	878741	Ca21chr2_C_albicans_SC5314881460	Ca21chr2_C_albicans_SC5314878741				Ca21chr2_C_albicans_SC5314881460			FALSE
Ca21chr2_C_albicans_SC5314	881627	Ca21chr2_C_albicans_SC5314	878799	Ca21chr2_C_albicans_SC5314881627	Ca21chr2_C_albicans_SC5314878799				Ca21chr2_C_albicans_SC5314881627			FALSE
Ca21chr2_C_albicans_SC5314	881696	Ca21chr2_C_albicans_SC5314	878864	Ca21chr2_C_albicans_SC5314881696	Ca21chr2_C_albicans_SC5314878864				Ca21chr2_C_albicans_SC5314881696			FALSE
Ca21chr2_C_albicans_SC5314	881705	Ca21chr2_C_albicans_SC5314	879005	Ca21chr2_C_albicans_SC5314881705	Ca21chr2_C_albicans_SC5314879005				Ca21chr2_C_albicans_SC5314881705			FALSE
Ca21chr2_C_albicans_SC5314	881720	Ca21chr2_C_albicans_SC5314	879227	Ca21chr2_C_albicans_SC5314881720	Ca21chr2_C_albicans_SC5314879227				Ca21chr2_C_albicans_SC5314881720			FALSE
Ca21chr2_C_albicans_SC5314	881816	Ca21chr2_C_albicans_SC5314	879230	Ca21chr2_C_albicans_SC5314881816	Ca21chr2_C_albicans_SC5314879230				Ca21chr2_C_albicans_SC5314881816			FALSE
Ca21chr2_C_albicans_SC5314	881843	Ca21chr2_C_albicans_SC5314	879242	Ca21chr2_C_albicans_SC5314881843	Ca21chr2_C_albicans_SC5314879242				Ca21chr2_C_albicans_SC5314881843			FALSE
Ca21chr2_C_albicans_SC5314	881891	Ca21chr2_C_albicans_SC5314	879266	Ca21chr2_C_albicans_SC5314881891	Ca21chr2_C_albicans_SC5314879266				Ca21chr2_C_albicans_SC5314881891			FALSE
Ca21chr2_C_albicans_SC5314	881957	Ca21chr2_C_albicans_SC5314	879299	Ca21chr2_C_albicans_SC5314881957	Ca21chr2_C_albicans_SC5314879299				Ca21chr2_C_albicans_SC5314881957			FALSE
Ca21chr2_C_albicans_SC5314	882020	Ca21chr2_C_albicans_SC5314	879392	Ca21chr2_C_albicans_SC5314882020	Ca21chr2_C_albicans_SC5314879392				Ca21chr2_C_albicans_SC5314882020			FALSE
Ca21chr2_C_albicans_SC5314	882098	Ca21chr2_C_albicans_SC5314	879398	Ca21chr2_C_albicans_SC5314882098	Ca21chr2_C_albicans_SC5314879398				Ca21chr2_C_albicans_SC5314882098			FALSE
Ca21chr2_C_albicans_SC5314	882512	Ca21chr2_C_albicans_SC5314	879434	Ca21chr2_C_albicans_SC5314882512	Ca21chr2_C_albicans_SC5314879434				Ca21chr2_C_albicans_SC5314882512			FALSE
Ca21chr2_C_albicans_SC5314	882821	Ca21chr2_C_albicans_SC5314	879611	Ca21chr2_C_albicans_SC5314882821	Ca21chr2_C_albicans_SC5314879611				Ca21chr2_C_albicans_SC5314882821			FALSE
Ca21chr2_C_albicans_SC5314	882827	Ca21chr2_C_albicans_SC5314	879938	Ca21chr2_C_albicans_SC5314882827	Ca21chr2_C_albicans_SC5314879938				Ca21chr2_C_albicans_SC5314882827			FALSE
Ca21chr2_C_albicans_SC5314	883214	Ca21chr2_C_albicans_SC5314	879965	Ca21chr2_C_albicans_SC5314883214	Ca21chr2_C_albicans_SC5314879965				Ca21chr2_C_albicans_SC5314883214			FALSE
Ca21chr2_C_albicans_SC5314	883215	Ca21chr2_C_albicans_SC5314	881050	Ca21chr2_C_albicans_SC5314883215	Ca21chr2_C_albicans_SC5314881050				Ca21chr2_C_albicans_SC5314883215			FALSE
Ca21chr2_C_albicans_SC5314	883216	Ca21chr2_C_albicans_SC5314	881056	Ca21chr2_C_albicans_SC5314883216	Ca21chr2_C_albicans_SC5314881056				Ca21chr2_C_albicans_SC5314883216			FALSE
Ca21chr2_C_albicans_SC5314	883222	Ca21chr2_C_albicans_SC5314	881060	Ca21chr2_C_albicans_SC5314883222	Ca21chr2_C_albicans_SC5314881060				Ca21chr2_C_albicans_SC5314883222			FALSE
Ca21chr2_C_albicans_SC5314	883228	Ca21chr2_C_albicans_SC5314	881062	Ca21chr2_C_albicans_SC5314883228	Ca21chr2_C_albicans_SC5314881062				Ca21chr2_C_albicans_SC5314883228			FALSE
Ca21chr2_C_albicans_SC5314	883229	Ca21chr2_C_albicans_SC5314	881063	Ca21chr2_C_albicans_SC5314883229	Ca21chr2_C_albicans_SC5314881063				Ca21chr2_C_albicans_SC5314883229			FALSE
Ca21chr2_C_albicans_SC5314	883360	Ca21chr2_C_albicans_SC5314	881077	Ca21chr2_C_albicans_SC5314883360	Ca21chr2_C_albicans_SC5314881077				Ca21chr2_C_albicans_SC5314883360			FALSE
Ca21chr2_C_albicans_SC5314	883368	Ca21chr2_C_albicans_SC5314	881157	Ca21chr2_C_albicans_SC5314883368	Ca21chr2_C_albicans_SC5314881157				Ca21chr2_C_albicans_SC5314883368			FALSE
Ca21chr2_C_albicans_SC5314	883525	Ca21chr2_C_albicans_SC5314	881215	Ca21chr2_C_albicans_SC5314883525	Ca21chr2_C_albicans_SC5314881215				Ca21chr2_C_albicans_SC5314883525			FALSE
Ca21chr2_C_albicans_SC5314	884827	Ca21chr2_C_albicans_SC5314	881333	Ca21chr2_C_albicans_SC5314884827	Ca21chr2_C_albicans_SC5314881333				Ca21chr2_C_albicans_SC5314884827			FALSE
Ca21chr2_C_albicans_SC5314	884910	Ca21chr2_C_albicans_SC5314	881460	Ca21chr2_C_albicans_SC5314884910	Ca21chr2_C_albicans_SC5314881460				Ca21chr2_C_albicans_SC5314884910			FALSE
Ca21chr2_C_albicans_SC5314	884980	Ca21chr2_C_albicans_SC5314	881627	Ca21chr2_C_albicans_SC5314884980	Ca21chr2_C_albicans_SC5314881627				Ca21chr2_C_albicans_SC5314884980			FALSE
Ca21chr2_C_albicans_SC5314	885028	Ca21chr2_C_albicans_SC5314	881696	Ca21chr2_C_albicans_SC5314885028	Ca21chr2_C_albicans_SC5314881696				Ca21chr2_C_albicans_SC5314885028			FALSE
Ca21chr2_C_albicans_SC5314	885118	Ca21chr2_C_albicans_SC5314	881705	Ca21chr2_C_albicans_SC5314885118	Ca21chr2_C_albicans_SC5314881705				Ca21chr2_C_albicans_SC5314885118			FALSE
Ca21chr2_C_albicans_SC5314	885138	Ca21chr2_C_albicans_SC5314	881720	Ca21chr2_C_albicans_SC5314885138	Ca21chr2_C_albicans_SC5314881720				Ca21chr2_C_albicans_SC5314885138			FALSE
Ca21chr2_C_albicans_SC5314	885208	Ca21chr2_C_albicans_SC5314	881816	Ca21chr2_C_albicans_SC5314885208	Ca21chr2_C_albicans_SC5314881816				Ca21chr2_C_albicans_SC5314885208			FALSE
Ca21chr2_C_albicans_SC5314	885209	Ca21chr2_C_albicans_SC5314	881843	Ca21chr2_C_albicans_SC5314885209	Ca21chr2_C_albicans_SC5314881843				Ca21chr2_C_albicans_SC5314885209			FALSE
Ca21chr2_C_albicans_SC5314	885214	Ca21chr2_C_albicans_SC5314	881891	Ca21chr2_C_albicans_SC5314885214	Ca21chr2_C_albicans_SC5314881891				Ca21chr2_C_albicans_SC5314885214			FALSE
Ca21chr2_C_albicans_SC5314	885244	Ca21chr2_C_albicans_SC5314	881957	Ca21chr2_C_albicans_SC5314885244	Ca21chr2_C_albicans_SC5314881957				Ca21chr2_C_albicans_SC5314885244			FALSE
Ca21chr2_C_albicans_SC5314	885289	Ca21chr2_C_albicans_SC5314	882020	Ca21chr2_C_albicans_SC5314885289	Ca21chr2_C_albicans_SC5314882020				Ca21chr2_C_albicans_SC5314885289			FALSE
Ca21chr2_C_albicans_SC5314	885313	Ca21chr2_C_albicans_SC5314	882098	Ca21chr2_C_albicans_SC5314885313	Ca21chr2_C_albicans_SC5314882098				Ca21chr2_C_albicans_SC5314885313			FALSE
Ca21chr2_C_albicans_SC5314	885325	Ca21chr2_C_albicans_SC5314	882512	Ca21chr2_C_albicans_SC5314885325	Ca21chr2_C_albicans_SC5314882512				Ca21chr2_C_albicans_SC5314885325			FALSE
Ca21chr2_C_albicans_SC5314	885343	Ca21chr2_C_albicans_SC5314	882821	Ca21chr2_C_albicans_SC5314885343	Ca21chr2_C_albicans_SC5314882821				Ca21chr2_C_albicans_SC5314885343			FALSE
Ca21chr2_C_albicans_SC5314	885409	Ca21chr2_C_albicans_SC5314	882827	Ca21chr2_C_albicans_SC5314885409	Ca21chr2_C_albicans_SC5314882827				Ca21chr2_C_albicans_SC5314885409			FALSE
Ca21chr2_C_albicans_SC5314	885421	Ca21chr2_C_albicans_SC5314	883214	Ca21chr2_C_albicans_SC5314885421	Ca21chr2_C_albicans_SC5314883214				Ca21chr2_C_albicans_SC5314885421			FALSE
Ca21chr2_C_albicans_SC5314	885459	Ca21chr2_C_albicans_SC5314	883215	Ca21chr2_C_albicans_SC5314885459	Ca21chr2_C_albicans_SC5314883215				Ca21chr2_C_albicans_SC5314885459			FALSE
Ca21chr2_C_albicans_SC5314	893339	Ca21chr2_C_albicans_SC5314	883216	Ca21chr2_C_albicans_SC5314893339	Ca21chr2_C_albicans_SC5314883216				Ca21chr2_C_albicans_SC5314893339			FALSE
Ca21chr2_C_albicans_SC5314	893361	Ca21chr2_C_albicans_SC5314	883222	Ca21chr2_C_albicans_SC5314893361	Ca21chr2_C_albicans_SC5314883222				Ca21chr2_C_albicans_SC5314893361			FALSE
Ca21chr2_C_albicans_SC5314	893369	Ca21chr2_C_albicans_SC5314	883228	Ca21chr2_C_albicans_SC5314893369	Ca21chr2_C_albicans_SC5314883228				Ca21chr2_C_albicans_SC5314893369			FALSE
Ca21chr2_C_albicans_SC5314	893417	Ca21chr2_C_albicans_SC5314	883229	Ca21chr2_C_albicans_SC5314893417	Ca21chr2_C_albicans_SC5314883229				Ca21chr2_C_albicans_SC5314893417			FALSE
Ca21chr2_C_albicans_SC5314	893628	Ca21chr2_C_albicans_SC5314	883312	Ca21chr2_C_albicans_SC5314893628	Ca21chr2_C_albicans_SC5314883312				Ca21chr2_C_albicans_SC5314893628			FALSE
Ca21chr2_C_albicans_SC5314	893633	Ca21chr2_C_albicans_SC5314	883313	Ca21chr2_C_albicans_SC5314893633	Ca21chr2_C_albicans_SC5314883313				Ca21chr2_C_albicans_SC5314893633			FALSE
Ca21chr2_C_albicans_SC5314	893705	Ca21chr2_C_albicans_SC5314	883360	Ca21chr2_C_albicans_SC5314893705	Ca21chr2_C_albicans_SC5314883360				Ca21chr2_C_albicans_SC5314893705			FALSE
Ca21chr2_C_albicans_SC5314	895645	Ca21chr2_C_albicans_SC5314	883368	Ca21chr2_C_albicans_SC5314895645	Ca21chr2_C_albicans_SC5314883368				Ca21chr2_C_albicans_SC5314895645			FALSE
Ca21chr2_C_albicans_SC5314	895704	Ca21chr2_C_albicans_SC5314	883403	Ca21chr2_C_albicans_SC5314895704	Ca21chr2_C_albicans_SC5314883403				Ca21chr2_C_albicans_SC5314895704			FALSE
Ca21chr2_C_albicans_SC5314	898111	Ca21chr2_C_albicans_SC5314	883525	Ca21chr2_C_albicans_SC5314898111	Ca21chr2_C_albicans_SC5314883525				Ca21chr2_C_albicans_SC5314898111			FALSE
Ca21chr2_C_albicans_SC5314	898340	Ca21chr2_C_albicans_SC5314	884827	Ca21chr2_C_albicans_SC5314898340	Ca21chr2_C_albicans_SC5314884827				Ca21chr2_C_albicans_SC5314898340			FALSE
Ca21chr2_C_albicans_SC5314	898388	Ca21chr2_C_albicans_SC5314	884910	Ca21chr2_C_albicans_SC5314898388	Ca21chr2_C_albicans_SC5314884910				Ca21chr2_C_albicans_SC5314898388			FALSE
Ca21chr2_C_albicans_SC5314	898405	Ca21chr2_C_albicans_SC5314	884980	Ca21chr2_C_albicans_SC5314898405	Ca21chr2_C_albicans_SC5314884980				Ca21chr2_C_albicans_SC5314898405			FALSE
Ca21chr2_C_albicans_SC5314	898411	Ca21chr2_C_albicans_SC5314	885028	Ca21chr2_C_albicans_SC5314898411	Ca21chr2_C_albicans_SC5314885028				Ca21chr2_C_albicans_SC5314898411			FALSE
Ca21chr2_C_albicans_SC5314	899178	Ca21chr2_C_albicans_SC5314	885118	Ca21chr2_C_albicans_SC5314899178	Ca21chr2_C_albicans_SC5314885118				Ca21chr2_C_albicans_SC5314899178			FALSE
Ca21chr2_C_albicans_SC5314	899310	Ca21chr2_C_albicans_SC5314	885138	Ca21chr2_C_albicans_SC5314899310	Ca21chr2_C_albicans_SC5314885138				Ca21chr2_C_albicans_SC5314899310			FALSE
Ca21chr2_C_albicans_SC5314	899490	Ca21chr2_C_albicans_SC5314	885208	Ca21chr2_C_albicans_SC5314899490	Ca21chr2_C_albicans_SC5314885208				Ca21chr2_C_albicans_SC5314899490			FALSE
Ca21chr2_C_albicans_SC5314	899491	Ca21chr2_C_albicans_SC5314	885209	Ca21chr2_C_albicans_SC5314899491	Ca21chr2_C_albicans_SC5314885209				Ca21chr2_C_albicans_SC5314899491			FALSE
Ca21chr2_C_albicans_SC5314	900234	Ca21chr2_C_albicans_SC5314	885214	Ca21chr2_C_albicans_SC5314900234	Ca21chr2_C_albicans_SC5314885214				Ca21chr2_C_albicans_SC5314900234			FALSE
Ca21chr2_C_albicans_SC5314	904044	Ca21chr2_C_albicans_SC5314	885244	Ca21chr2_C_albicans_SC5314904044	Ca21chr2_C_albicans_SC5314885244				Ca21chr2_C_albicans_SC5314904044			FALSE
Ca21chr2_C_albicans_SC5314	904047	Ca21chr2_C_albicans_SC5314	885289	Ca21chr2_C_albicans_SC5314904047	Ca21chr2_C_albicans_SC5314885289				Ca21chr2_C_albicans_SC5314904047			FALSE
Ca21chr2_C_albicans_SC5314	904558	Ca21chr2_C_albicans_SC5314	885313	Ca21chr2_C_albicans_SC5314904558	Ca21chr2_C_albicans_SC5314885313				Ca21chr2_C_albicans_SC5314904558			FALSE
Ca21chr2_C_albicans_SC5314	904674	Ca21chr2_C_albicans_SC5314	885325	Ca21chr2_C_albicans_SC5314904674	Ca21chr2_C_albicans_SC5314885325				Ca21chr2_C_albicans_SC5314904674			FALSE
Ca21chr2_C_albicans_SC5314	904744	Ca21chr2_C_albicans_SC5314	885343	Ca21chr2_C_albicans_SC5314904744	Ca21chr2_C_albicans_SC5314885343				Ca21chr2_C_albicans_SC5314904744			FALSE
Ca21chr2_C_albicans_SC5314	905547	Ca21chr2_C_albicans_SC5314	885409	Ca21chr2_C_albicans_SC5314905547	Ca21chr2_C_albicans_SC5314885409				Ca21chr2_C_albicans_SC5314905547			FALSE
Ca21chr2_C_albicans_SC5314	905549	Ca21chr2_C_albicans_SC5314	885421	Ca21chr2_C_albicans_SC5314905549	Ca21chr2_C_albicans_SC5314885421				Ca21chr2_C_albicans_SC5314905549			FALSE
Ca21chr2_C_albicans_SC5314	909324	Ca21chr2_C_albicans_SC5314	885459	Ca21chr2_C_albicans_SC5314909324	Ca21chr2_C_albicans_SC5314885459				Ca21chr2_C_albicans_SC5314909324			FALSE
Ca21chr2_C_albicans_SC5314	909560	Ca21chr2_C_albicans_SC5314	893339	Ca21chr2_C_albicans_SC5314909560	Ca21chr2_C_albicans_SC5314893339				Ca21chr2_C_albicans_SC5314909560			FALSE
Ca21chr2_C_albicans_SC5314	909566	Ca21chr2_C_albicans_SC5314	893361	Ca21chr2_C_albicans_SC5314909566	Ca21chr2_C_albicans_SC5314893361				Ca21chr2_C_albicans_SC5314909566			FALSE
Ca21chr2_C_albicans_SC5314	909599	Ca21chr2_C_albicans_SC5314	893369	Ca21chr2_C_albicans_SC5314909599	Ca21chr2_C_albicans_SC5314893369				Ca21chr2_C_albicans_SC5314909599			FALSE
Ca21chr2_C_albicans_SC5314	909602	Ca21chr2_C_albicans_SC5314	893417	Ca21chr2_C_albicans_SC5314909602	Ca21chr2_C_albicans_SC5314893417				Ca21chr2_C_albicans_SC5314909602			FALSE
Ca21chr2_C_albicans_SC5314	923380	Ca21chr2_C_albicans_SC5314	893628	Ca21chr2_C_albicans_SC5314923380	Ca21chr2_C_albicans_SC5314893628				Ca21chr2_C_albicans_SC5314923380			FALSE
Ca21chr2_C_albicans_SC5314	926058	Ca21chr2_C_albicans_SC5314	893633	Ca21chr2_C_albicans_SC5314926058	Ca21chr2_C_albicans_SC5314893633				Ca21chr2_C_albicans_SC5314926058			FALSE
Ca21chr2_C_albicans_SC5314	926379	Ca21chr2_C_albicans_SC5314	893705	Ca21chr2_C_albicans_SC5314926379	Ca21chr2_C_albicans_SC5314893705				Ca21chr2_C_albicans_SC5314926379			FALSE
Ca21chr2_C_albicans_SC5314	926404	Ca21chr2_C_albicans_SC5314	895645	Ca21chr2_C_albicans_SC5314926404	Ca21chr2_C_albicans_SC5314895645				Ca21chr2_C_albicans_SC5314926404			FALSE
Ca21chr2_C_albicans_SC5314	926450	Ca21chr2_C_albicans_SC5314	895704	Ca21chr2_C_albicans_SC5314926450	Ca21chr2_C_albicans_SC5314895704				Ca21chr2_C_albicans_SC5314926450			FALSE
Ca21chr2_C_albicans_SC5314	926973	Ca21chr2_C_albicans_SC5314	898111	Ca21chr2_C_albicans_SC5314926973	Ca21chr2_C_albicans_SC5314898111				Ca21chr2_C_albicans_SC5314926973			FALSE
Ca21chr2_C_albicans_SC5314	928773	Ca21chr2_C_albicans_SC5314	898340	Ca21chr2_C_albicans_SC5314928773	Ca21chr2_C_albicans_SC5314898340				Ca21chr2_C_albicans_SC5314928773			FALSE
Ca21chr2_C_albicans_SC5314	928829	Ca21chr2_C_albicans_SC5314	898388	Ca21chr2_C_albicans_SC5314928829	Ca21chr2_C_albicans_SC5314898388				Ca21chr2_C_albicans_SC5314928829			FALSE
Ca21chr2_C_albicans_SC5314	928987	Ca21chr2_C_albicans_SC5314	898405	Ca21chr2_C_albicans_SC5314928987	Ca21chr2_C_albicans_SC5314898405				Ca21chr2_C_albicans_SC5314928987			FALSE
Ca21chr2_C_albicans_SC5314	928996	Ca21chr2_C_albicans_SC5314	898411	Ca21chr2_C_albicans_SC5314928996	Ca21chr2_C_albicans_SC5314898411				Ca21chr2_C_albicans_SC5314928996			FALSE
Ca21chr2_C_albicans_SC5314	929336	Ca21chr2_C_albicans_SC5314	899178	Ca21chr2_C_albicans_SC5314929336	Ca21chr2_C_albicans_SC5314899178				Ca21chr2_C_albicans_SC5314929336			FALSE
Ca21chr2_C_albicans_SC5314	929431	Ca21chr2_C_albicans_SC5314	899310	Ca21chr2_C_albicans_SC5314929431	Ca21chr2_C_albicans_SC5314899310				Ca21chr2_C_albicans_SC5314929431			FALSE
Ca21chr2_C_albicans_SC5314	929459	Ca21chr2_C_albicans_SC5314	899490	Ca21chr2_C_albicans_SC5314929459	Ca21chr2_C_albicans_SC5314899490				Ca21chr2_C_albicans_SC5314929459			FALSE
Ca21chr2_C_albicans_SC5314	929462	Ca21chr2_C_albicans_SC5314	899491	Ca21chr2_C_albicans_SC5314929462	Ca21chr2_C_albicans_SC5314899491				Ca21chr2_C_albicans_SC5314929462			FALSE
Ca21chr2_C_albicans_SC5314	929610	Ca21chr2_C_albicans_SC5314	900234	Ca21chr2_C_albicans_SC5314929610	Ca21chr2_C_albicans_SC5314900234				Ca21chr2_C_albicans_SC5314929610			FALSE
Ca21chr2_C_albicans_SC5314	929625	Ca21chr2_C_albicans_SC5314	904044	Ca21chr2_C_albicans_SC5314929625	Ca21chr2_C_albicans_SC5314904044				Ca21chr2_C_albicans_SC5314929625			FALSE
Ca21chr2_C_albicans_SC5314	929722	Ca21chr2_C_albicans_SC5314	904047	Ca21chr2_C_albicans_SC5314929722	Ca21chr2_C_albicans_SC5314904047				Ca21chr2_C_albicans_SC5314929722			FALSE
Ca21chr2_C_albicans_SC5314	929726	Ca21chr2_C_albicans_SC5314	904558	Ca21chr2_C_albicans_SC5314929726	Ca21chr2_C_albicans_SC5314904558				Ca21chr2_C_albicans_SC5314929726			FALSE
Ca21chr2_C_albicans_SC5314	930216	Ca21chr2_C_albicans_SC5314	904674	Ca21chr2_C_albicans_SC5314930216	Ca21chr2_C_albicans_SC5314904674				Ca21chr2_C_albicans_SC5314930216			FALSE
Ca21chr2_C_albicans_SC5314	930217	Ca21chr2_C_albicans_SC5314	904744	Ca21chr2_C_albicans_SC5314930217	Ca21chr2_C_albicans_SC5314904744				Ca21chr2_C_albicans_SC5314930217			FALSE
Ca21chr2_C_albicans_SC5314	930805	Ca21chr2_C_albicans_SC5314	905547	Ca21chr2_C_albicans_SC5314930805	Ca21chr2_C_albicans_SC5314905547				Ca21chr2_C_albicans_SC5314930805			FALSE
Ca21chr2_C_albicans_SC5314	937814	Ca21chr2_C_albicans_SC5314	905549	Ca21chr2_C_albicans_SC5314937814	Ca21chr2_C_albicans_SC5314905549				Ca21chr2_C_albicans_SC5314937814			FALSE
Ca21chr2_C_albicans_SC5314	938004	Ca21chr2_C_albicans_SC5314	909324	Ca21chr2_C_albicans_SC5314938004	Ca21chr2_C_albicans_SC5314909324				Ca21chr2_C_albicans_SC5314938004			FALSE
Ca21chr2_C_albicans_SC5314	938873	Ca21chr2_C_albicans_SC5314	909560	Ca21chr2_C_albicans_SC5314938873	Ca21chr2_C_albicans_SC5314909560				Ca21chr2_C_albicans_SC5314938873			FALSE
Ca21chr2_C_albicans_SC5314	938917	Ca21chr2_C_albicans_SC5314	909566	Ca21chr2_C_albicans_SC5314938917	Ca21chr2_C_albicans_SC5314909566				Ca21chr2_C_albicans_SC5314938917			FALSE
Ca21chr2_C_albicans_SC5314	938999	Ca21chr2_C_albicans_SC5314	909599	Ca21chr2_C_albicans_SC5314938999	Ca21chr2_C_albicans_SC5314909599				Ca21chr2_C_albicans_SC5314938999			FALSE
Ca21chr2_C_albicans_SC5314	939038	Ca21chr2_C_albicans_SC5314	909602	Ca21chr2_C_albicans_SC5314939038	Ca21chr2_C_albicans_SC5314909602				Ca21chr2_C_albicans_SC5314939038			FALSE
Ca21chr2_C_albicans_SC5314	939191	Ca21chr2_C_albicans_SC5314	923380	Ca21chr2_C_albicans_SC5314939191	Ca21chr2_C_albicans_SC5314923380				Ca21chr2_C_albicans_SC5314939191			FALSE
Ca21chr2_C_albicans_SC5314	939209	Ca21chr2_C_albicans_SC5314	926058	Ca21chr2_C_albicans_SC5314939209	Ca21chr2_C_albicans_SC5314926058				Ca21chr2_C_albicans_SC5314939209			FALSE
Ca21chr2_C_albicans_SC5314	939335	Ca21chr2_C_albicans_SC5314	926376	Ca21chr2_C_albicans_SC5314939335	Ca21chr2_C_albicans_SC5314926376				Ca21chr2_C_albicans_SC5314939335			FALSE
Ca21chr2_C_albicans_SC5314	939501	Ca21chr2_C_albicans_SC5314	926379	Ca21chr2_C_albicans_SC5314939501	Ca21chr2_C_albicans_SC5314926379				Ca21chr2_C_albicans_SC5314939501			FALSE
Ca21chr2_C_albicans_SC5314	941010	Ca21chr2_C_albicans_SC5314	926402	Ca21chr2_C_albicans_SC5314941010	Ca21chr2_C_albicans_SC5314926402				Ca21chr2_C_albicans_SC5314941010			FALSE
Ca21chr2_C_albicans_SC5314	941013	Ca21chr2_C_albicans_SC5314	926404	Ca21chr2_C_albicans_SC5314941013	Ca21chr2_C_albicans_SC5314926404				Ca21chr2_C_albicans_SC5314941013			FALSE
Ca21chr2_C_albicans_SC5314	941016	Ca21chr2_C_albicans_SC5314	926450	Ca21chr2_C_albicans_SC5314941016	Ca21chr2_C_albicans_SC5314926450				Ca21chr2_C_albicans_SC5314941016			FALSE
Ca21chr2_C_albicans_SC5314	941070	Ca21chr2_C_albicans_SC5314	926973	Ca21chr2_C_albicans_SC5314941070	Ca21chr2_C_albicans_SC5314926973				Ca21chr2_C_albicans_SC5314941070			FALSE
Ca21chr2_C_albicans_SC5314	941073	Ca21chr2_C_albicans_SC5314	928773	Ca21chr2_C_albicans_SC5314941073	Ca21chr2_C_albicans_SC5314928773				Ca21chr2_C_albicans_SC5314941073			FALSE
Ca21chr2_C_albicans_SC5314	941100	Ca21chr2_C_albicans_SC5314	928829	Ca21chr2_C_albicans_SC5314941100	Ca21chr2_C_albicans_SC5314928829				Ca21chr2_C_albicans_SC5314941100			FALSE
Ca21chr2_C_albicans_SC5314	941124	Ca21chr2_C_albicans_SC5314	928987	Ca21chr2_C_albicans_SC5314941124	Ca21chr2_C_albicans_SC5314928987				Ca21chr2_C_albicans_SC5314941124			FALSE
Ca21chr2_C_albicans_SC5314	941151	Ca21chr2_C_albicans_SC5314	928996	Ca21chr2_C_albicans_SC5314941151	Ca21chr2_C_albicans_SC5314928996				Ca21chr2_C_albicans_SC5314941151			FALSE
Ca21chr2_C_albicans_SC5314	941249	Ca21chr2_C_albicans_SC5314	929168	Ca21chr2_C_albicans_SC5314941249	Ca21chr2_C_albicans_SC5314929168				Ca21chr2_C_albicans_SC5314941249			FALSE
Ca21chr2_C_albicans_SC5314	941255	Ca21chr2_C_albicans_SC5314	929220	Ca21chr2_C_albicans_SC5314941255	Ca21chr2_C_albicans_SC5314929220				Ca21chr2_C_albicans_SC5314941255			FALSE
Ca21chr2_C_albicans_SC5314	941256	Ca21chr2_C_albicans_SC5314	929225	Ca21chr2_C_albicans_SC5314941256	Ca21chr2_C_albicans_SC5314929225				Ca21chr2_C_albicans_SC5314941256			FALSE
Ca21chr2_C_albicans_SC5314	941267	Ca21chr2_C_albicans_SC5314	929336	Ca21chr2_C_albicans_SC5314941267	Ca21chr2_C_albicans_SC5314929336				Ca21chr2_C_albicans_SC5314941267			FALSE
Ca21chr2_C_albicans_SC5314	941277	Ca21chr2_C_albicans_SC5314	929431	Ca21chr2_C_albicans_SC5314941277	Ca21chr2_C_albicans_SC5314929431				Ca21chr2_C_albicans_SC5314941277			FALSE
Ca21chr2_C_albicans_SC5314	941365	Ca21chr2_C_albicans_SC5314	929459	Ca21chr2_C_albicans_SC5314941365	Ca21chr2_C_albicans_SC5314929459				Ca21chr2_C_albicans_SC5314941365			FALSE
Ca21chr2_C_albicans_SC5314	941392	Ca21chr2_C_albicans_SC5314	929462	Ca21chr2_C_albicans_SC5314941392	Ca21chr2_C_albicans_SC5314929462				Ca21chr2_C_albicans_SC5314941392			FALSE
Ca21chr2_C_albicans_SC5314	941409	Ca21chr2_C_albicans_SC5314	929610	Ca21chr2_C_albicans_SC5314941409	Ca21chr2_C_albicans_SC5314929610				Ca21chr2_C_albicans_SC5314941409			FALSE
Ca21chr2_C_albicans_SC5314	941430	Ca21chr2_C_albicans_SC5314	929625	Ca21chr2_C_albicans_SC5314941430	Ca21chr2_C_albicans_SC5314929625				Ca21chr2_C_albicans_SC5314941430			FALSE
Ca21chr2_C_albicans_SC5314	941446	Ca21chr2_C_albicans_SC5314	929722	Ca21chr2_C_albicans_SC5314941446	Ca21chr2_C_albicans_SC5314929722				Ca21chr2_C_albicans_SC5314941446			FALSE
Ca21chr2_C_albicans_SC5314	941661	Ca21chr2_C_albicans_SC5314	929726	Ca21chr2_C_albicans_SC5314941661	Ca21chr2_C_albicans_SC5314929726				Ca21chr2_C_albicans_SC5314941661			FALSE
Ca21chr2_C_albicans_SC5314	941664	Ca21chr2_C_albicans_SC5314	930216	Ca21chr2_C_albicans_SC5314941664	Ca21chr2_C_albicans_SC5314930216				Ca21chr2_C_albicans_SC5314941664			FALSE
Ca21chr2_C_albicans_SC5314	941667	Ca21chr2_C_albicans_SC5314	930217	Ca21chr2_C_albicans_SC5314941667	Ca21chr2_C_albicans_SC5314930217				Ca21chr2_C_albicans_SC5314941667			FALSE
Ca21chr2_C_albicans_SC5314	941745	Ca21chr2_C_albicans_SC5314	930805	Ca21chr2_C_albicans_SC5314941745	Ca21chr2_C_albicans_SC5314930805				Ca21chr2_C_albicans_SC5314941745			FALSE
Ca21chr2_C_albicans_SC5314	941832	Ca21chr2_C_albicans_SC5314	937814	Ca21chr2_C_albicans_SC5314941832	Ca21chr2_C_albicans_SC5314937814				Ca21chr2_C_albicans_SC5314941832			FALSE
Ca21chr2_C_albicans_SC5314	942645	Ca21chr2_C_albicans_SC5314	938004	Ca21chr2_C_albicans_SC5314942645	Ca21chr2_C_albicans_SC5314938004				Ca21chr2_C_albicans_SC5314942645			FALSE
Ca21chr2_C_albicans_SC5314	942654	Ca21chr2_C_albicans_SC5314	938873	Ca21chr2_C_albicans_SC5314942654	Ca21chr2_C_albicans_SC5314938873				Ca21chr2_C_albicans_SC5314942654			FALSE
Ca21chr2_C_albicans_SC5314	942681	Ca21chr2_C_albicans_SC5314	938917	Ca21chr2_C_albicans_SC5314942681	Ca21chr2_C_albicans_SC5314938917				Ca21chr2_C_albicans_SC5314942681			FALSE
Ca21chr2_C_albicans_SC5314	942783	Ca21chr2_C_albicans_SC5314	938999	Ca21chr2_C_albicans_SC5314942783	Ca21chr2_C_albicans_SC5314938999				Ca21chr2_C_albicans_SC5314942783			FALSE
Ca21chr2_C_albicans_SC5314	942798	Ca21chr2_C_albicans_SC5314	939038	Ca21chr2_C_albicans_SC5314942798	Ca21chr2_C_albicans_SC5314939038				Ca21chr2_C_albicans_SC5314942798			FALSE
Ca21chr2_C_albicans_SC5314	942897	Ca21chr2_C_albicans_SC5314	939191	Ca21chr2_C_albicans_SC5314942897	Ca21chr2_C_albicans_SC5314939191				Ca21chr2_C_albicans_SC5314942897			FALSE
Ca21chr2_C_albicans_SC5314	942903	Ca21chr2_C_albicans_SC5314	939209	Ca21chr2_C_albicans_SC5314942903	Ca21chr2_C_albicans_SC5314939209				Ca21chr2_C_albicans_SC5314942903			FALSE
Ca21chr2_C_albicans_SC5314	943641	Ca21chr2_C_albicans_SC5314	939335	Ca21chr2_C_albicans_SC5314943641	Ca21chr2_C_albicans_SC5314939335				Ca21chr2_C_albicans_SC5314943641			FALSE
Ca21chr2_C_albicans_SC5314	943647	Ca21chr2_C_albicans_SC5314	939501	Ca21chr2_C_albicans_SC5314943647	Ca21chr2_C_albicans_SC5314939501				Ca21chr2_C_albicans_SC5314943647			FALSE
Ca21chr2_C_albicans_SC5314	949734	Ca21chr2_C_albicans_SC5314	941010	Ca21chr2_C_albicans_SC5314949734	Ca21chr2_C_albicans_SC5314941010				Ca21chr2_C_albicans_SC5314949734			FALSE
Ca21chr2_C_albicans_SC5314	949766	Ca21chr2_C_albicans_SC5314	941013	Ca21chr2_C_albicans_SC5314949766	Ca21chr2_C_albicans_SC5314941013				Ca21chr2_C_albicans_SC5314949766			FALSE
Ca21chr2_C_albicans_SC5314	950079	Ca21chr2_C_albicans_SC5314	941016	Ca21chr2_C_albicans_SC5314950079	Ca21chr2_C_albicans_SC5314941016				Ca21chr2_C_albicans_SC5314950079			FALSE
Ca21chr2_C_albicans_SC5314	950711	Ca21chr2_C_albicans_SC5314	941070	Ca21chr2_C_albicans_SC5314950711	Ca21chr2_C_albicans_SC5314941070				Ca21chr2_C_albicans_SC5314950711			FALSE
Ca21chr2_C_albicans_SC5314	950712	Ca21chr2_C_albicans_SC5314	941073	Ca21chr2_C_albicans_SC5314950712	Ca21chr2_C_albicans_SC5314941073				Ca21chr2_C_albicans_SC5314950712			FALSE
Ca21chr2_C_albicans_SC5314	950718	Ca21chr2_C_albicans_SC5314	941100	Ca21chr2_C_albicans_SC5314950718	Ca21chr2_C_albicans_SC5314941100				Ca21chr2_C_albicans_SC5314950718			FALSE
Ca21chr2_C_albicans_SC5314	950755	Ca21chr2_C_albicans_SC5314	941124	Ca21chr2_C_albicans_SC5314950755	Ca21chr2_C_albicans_SC5314941124				Ca21chr2_C_albicans_SC5314950755			FALSE
Ca21chr2_C_albicans_SC5314	950770	Ca21chr2_C_albicans_SC5314	941151	Ca21chr2_C_albicans_SC5314950770	Ca21chr2_C_albicans_SC5314941151				Ca21chr2_C_albicans_SC5314950770			FALSE
Ca21chr2_C_albicans_SC5314	950778	Ca21chr2_C_albicans_SC5314	941249	Ca21chr2_C_albicans_SC5314950778	Ca21chr2_C_albicans_SC5314941249				Ca21chr2_C_albicans_SC5314950778			FALSE
Ca21chr2_C_albicans_SC5314	950940	Ca21chr2_C_albicans_SC5314	941255	Ca21chr2_C_albicans_SC5314950940	Ca21chr2_C_albicans_SC5314941255				Ca21chr2_C_albicans_SC5314950940			FALSE
Ca21chr2_C_albicans_SC5314	951051	Ca21chr2_C_albicans_SC5314	941256	Ca21chr2_C_albicans_SC5314951051	Ca21chr2_C_albicans_SC5314941256				Ca21chr2_C_albicans_SC5314951051			FALSE
Ca21chr2_C_albicans_SC5314	951225	Ca21chr2_C_albicans_SC5314	941267	Ca21chr2_C_albicans_SC5314951225	Ca21chr2_C_albicans_SC5314941267				Ca21chr2_C_albicans_SC5314951225			FALSE
Ca21chr2_C_albicans_SC5314	955567	Ca21chr2_C_albicans_SC5314	941277	Ca21chr2_C_albicans_SC5314955567	Ca21chr2_C_albicans_SC5314941277				Ca21chr2_C_albicans_SC5314955567			FALSE
Ca21chr2_C_albicans_SC5314	955609	Ca21chr2_C_albicans_SC5314	941365	Ca21chr2_C_albicans_SC5314955609	Ca21chr2_C_albicans_SC5314941365				Ca21chr2_C_albicans_SC5314955609			FALSE
Ca21chr2_C_albicans_SC5314	955678	Ca21chr2_C_albicans_SC5314	941392	Ca21chr2_C_albicans_SC5314955678	Ca21chr2_C_albicans_SC5314941392				Ca21chr2_C_albicans_SC5314955678			FALSE
Ca21chr2_C_albicans_SC5314	955777	Ca21chr2_C_albicans_SC5314	941409	Ca21chr2_C_albicans_SC5314955777	Ca21chr2_C_albicans_SC5314941409				Ca21chr2_C_albicans_SC5314955777			FALSE
Ca21chr2_C_albicans_SC5314	955894	Ca21chr2_C_albicans_SC5314	941430	Ca21chr2_C_albicans_SC5314955894	Ca21chr2_C_albicans_SC5314941430				Ca21chr2_C_albicans_SC5314955894			FALSE
Ca21chr2_C_albicans_SC5314	956992	Ca21chr2_C_albicans_SC5314	941446	Ca21chr2_C_albicans_SC5314956992	Ca21chr2_C_albicans_SC5314941446				Ca21chr2_C_albicans_SC5314956992			FALSE
Ca21chr2_C_albicans_SC5314	957079	Ca21chr2_C_albicans_SC5314	941661	Ca21chr2_C_albicans_SC5314957079	Ca21chr2_C_albicans_SC5314941661				Ca21chr2_C_albicans_SC5314957079			FALSE
Ca21chr2_C_albicans_SC5314	957088	Ca21chr2_C_albicans_SC5314	941664	Ca21chr2_C_albicans_SC5314957088	Ca21chr2_C_albicans_SC5314941664				Ca21chr2_C_albicans_SC5314957088			FALSE
Ca21chr2_C_albicans_SC5314	957236	Ca21chr2_C_albicans_SC5314	941667	Ca21chr2_C_albicans_SC5314957236	Ca21chr2_C_albicans_SC5314941667				Ca21chr2_C_albicans_SC5314957236			FALSE
Ca21chr2_C_albicans_SC5314	957392	Ca21chr2_C_albicans_SC5314	941745	Ca21chr2_C_albicans_SC5314957392	Ca21chr2_C_albicans_SC5314941745				Ca21chr2_C_albicans_SC5314957392			FALSE
Ca21chr2_C_albicans_SC5314	957550	Ca21chr2_C_albicans_SC5314	941832	Ca21chr2_C_albicans_SC5314957550	Ca21chr2_C_albicans_SC5314941832				Ca21chr2_C_albicans_SC5314957550			FALSE
Ca21chr2_C_albicans_SC5314	957570	Ca21chr2_C_albicans_SC5314	942645	Ca21chr2_C_albicans_SC5314957570	Ca21chr2_C_albicans_SC5314942645				Ca21chr2_C_albicans_SC5314957570			FALSE
Ca21chr2_C_albicans_SC5314	957745	Ca21chr2_C_albicans_SC5314	942654	Ca21chr2_C_albicans_SC5314957745	Ca21chr2_C_albicans_SC5314942654				Ca21chr2_C_albicans_SC5314957745			FALSE
Ca21chr2_C_albicans_SC5314	959541	Ca21chr2_C_albicans_SC5314	942681	Ca21chr2_C_albicans_SC5314959541	Ca21chr2_C_albicans_SC5314942681				Ca21chr2_C_albicans_SC5314959541			FALSE
Ca21chr2_C_albicans_SC5314	967286	Ca21chr2_C_albicans_SC5314	942783	Ca21chr2_C_albicans_SC5314967286	Ca21chr2_C_albicans_SC5314942783				Ca21chr2_C_albicans_SC5314967286			FALSE
Ca21chr2_C_albicans_SC5314	967848	Ca21chr2_C_albicans_SC5314	942798	Ca21chr2_C_albicans_SC5314967848	Ca21chr2_C_albicans_SC5314942798				Ca21chr2_C_albicans_SC5314967848			FALSE
Ca21chr2_C_albicans_SC5314	971875	Ca21chr2_C_albicans_SC5314	942897	Ca21chr2_C_albicans_SC5314971875	Ca21chr2_C_albicans_SC5314942897				Ca21chr2_C_albicans_SC5314971875			FALSE
Ca21chr2_C_albicans_SC5314	971883	Ca21chr2_C_albicans_SC5314	942903	Ca21chr2_C_albicans_SC5314971883	Ca21chr2_C_albicans_SC5314942903				Ca21chr2_C_albicans_SC5314971883			FALSE
Ca21chr2_C_albicans_SC5314	972044	Ca21chr2_C_albicans_SC5314	943641	Ca21chr2_C_albicans_SC5314972044	Ca21chr2_C_albicans_SC5314943641				Ca21chr2_C_albicans_SC5314972044			FALSE
Ca21chr2_C_albicans_SC5314	972047	Ca21chr2_C_albicans_SC5314	943647	Ca21chr2_C_albicans_SC5314972047	Ca21chr2_C_albicans_SC5314943647				Ca21chr2_C_albicans_SC5314972047			FALSE
Ca21chr2_C_albicans_SC5314	972050	Ca21chr2_C_albicans_SC5314	949734	Ca21chr2_C_albicans_SC5314972050	Ca21chr2_C_albicans_SC5314949734				Ca21chr2_C_albicans_SC5314972050			FALSE
Ca21chr2_C_albicans_SC5314	972053	Ca21chr2_C_albicans_SC5314	949766	Ca21chr2_C_albicans_SC5314972053	Ca21chr2_C_albicans_SC5314949766				Ca21chr2_C_albicans_SC5314972053			FALSE
Ca21chr2_C_albicans_SC5314	972065	Ca21chr2_C_albicans_SC5314	950079	Ca21chr2_C_albicans_SC5314972065	Ca21chr2_C_albicans_SC5314950079				Ca21chr2_C_albicans_SC5314972065			FALSE
Ca21chr2_C_albicans_SC5314	972071	Ca21chr2_C_albicans_SC5314	950711	Ca21chr2_C_albicans_SC5314972071	Ca21chr2_C_albicans_SC5314950711				Ca21chr2_C_albicans_SC5314972071			FALSE
Ca21chr2_C_albicans_SC5314	972074	Ca21chr2_C_albicans_SC5314	950712	Ca21chr2_C_albicans_SC5314972074	Ca21chr2_C_albicans_SC5314950712				Ca21chr2_C_albicans_SC5314972074			FALSE
Ca21chr2_C_albicans_SC5314	972266	Ca21chr2_C_albicans_SC5314	950718	Ca21chr2_C_albicans_SC5314972266	Ca21chr2_C_albicans_SC5314950718				Ca21chr2_C_albicans_SC5314972266			FALSE
Ca21chr2_C_albicans_SC5314	972268	Ca21chr2_C_albicans_SC5314	950755	Ca21chr2_C_albicans_SC5314972268	Ca21chr2_C_albicans_SC5314950755				Ca21chr2_C_albicans_SC5314972268			FALSE
Ca21chr2_C_albicans_SC5314	972271	Ca21chr2_C_albicans_SC5314	950770	Ca21chr2_C_albicans_SC5314972271	Ca21chr2_C_albicans_SC5314950770				Ca21chr2_C_albicans_SC5314972271			FALSE
Ca21chr2_C_albicans_SC5314	972289	Ca21chr2_C_albicans_SC5314	950778	Ca21chr2_C_albicans_SC5314972289	Ca21chr2_C_albicans_SC5314950778				Ca21chr2_C_albicans_SC5314972289			FALSE
Ca21chr2_C_albicans_SC5314	972292	Ca21chr2_C_albicans_SC5314	950940	Ca21chr2_C_albicans_SC5314972292	Ca21chr2_C_albicans_SC5314950940				Ca21chr2_C_albicans_SC5314972292			FALSE
Ca21chr2_C_albicans_SC5314	972295	Ca21chr2_C_albicans_SC5314	951051	Ca21chr2_C_albicans_SC5314972295	Ca21chr2_C_albicans_SC5314951051				Ca21chr2_C_albicans_SC5314972295			FALSE
Ca21chr2_C_albicans_SC5314	972309	Ca21chr2_C_albicans_SC5314	951225	Ca21chr2_C_albicans_SC5314972309	Ca21chr2_C_albicans_SC5314951225				Ca21chr2_C_albicans_SC5314972309			FALSE
Ca21chr2_C_albicans_SC5314	972328	Ca21chr2_C_albicans_SC5314	955567	Ca21chr2_C_albicans_SC5314972328	Ca21chr2_C_albicans_SC5314955567				Ca21chr2_C_albicans_SC5314972328			FALSE
Ca21chr2_C_albicans_SC5314	972330	Ca21chr2_C_albicans_SC5314	955609	Ca21chr2_C_albicans_SC5314972330	Ca21chr2_C_albicans_SC5314955609				Ca21chr2_C_albicans_SC5314972330			FALSE
Ca21chr2_C_albicans_SC5314	972335	Ca21chr2_C_albicans_SC5314	955678	Ca21chr2_C_albicans_SC5314972335	Ca21chr2_C_albicans_SC5314955678				Ca21chr2_C_albicans_SC5314972335			FALSE
Ca21chr2_C_albicans_SC5314	972336	Ca21chr2_C_albicans_SC5314	955777	Ca21chr2_C_albicans_SC5314972336	Ca21chr2_C_albicans_SC5314955777				Ca21chr2_C_albicans_SC5314972336			FALSE
Ca21chr2_C_albicans_SC5314	972347	Ca21chr2_C_albicans_SC5314	955894	Ca21chr2_C_albicans_SC5314972347	Ca21chr2_C_albicans_SC5314955894				Ca21chr2_C_albicans_SC5314972347			FALSE
Ca21chr2_C_albicans_SC5314	973296	Ca21chr2_C_albicans_SC5314	956992	Ca21chr2_C_albicans_SC5314973296	Ca21chr2_C_albicans_SC5314956992				Ca21chr2_C_albicans_SC5314973296			FALSE
Ca21chr2_C_albicans_SC5314	974043	Ca21chr2_C_albicans_SC5314	957079	Ca21chr2_C_albicans_SC5314974043	Ca21chr2_C_albicans_SC5314957079				Ca21chr2_C_albicans_SC5314974043			FALSE
Ca21chr2_C_albicans_SC5314	974095	Ca21chr2_C_albicans_SC5314	957088	Ca21chr2_C_albicans_SC5314974095	Ca21chr2_C_albicans_SC5314957088				Ca21chr2_C_albicans_SC5314974095			FALSE
Ca21chr2_C_albicans_SC5314	974200	Ca21chr2_C_albicans_SC5314	957236	Ca21chr2_C_albicans_SC5314974200	Ca21chr2_C_albicans_SC5314957236				Ca21chr2_C_albicans_SC5314974200			FALSE
Ca21chr2_C_albicans_SC5314	974210	Ca21chr2_C_albicans_SC5314	957392	Ca21chr2_C_albicans_SC5314974210	Ca21chr2_C_albicans_SC5314957392				Ca21chr2_C_albicans_SC5314974210			FALSE
Ca21chr2_C_albicans_SC5314	974645	Ca21chr2_C_albicans_SC5314	957550	Ca21chr2_C_albicans_SC5314974645	Ca21chr2_C_albicans_SC5314957550				Ca21chr2_C_albicans_SC5314974645			FALSE
Ca21chr2_C_albicans_SC5314	974768	Ca21chr2_C_albicans_SC5314	957570	Ca21chr2_C_albicans_SC5314974768	Ca21chr2_C_albicans_SC5314957570				Ca21chr2_C_albicans_SC5314974768			FALSE
Ca21chr2_C_albicans_SC5314	974786	Ca21chr2_C_albicans_SC5314	957745	Ca21chr2_C_albicans_SC5314974786	Ca21chr2_C_albicans_SC5314957745				Ca21chr2_C_albicans_SC5314974786			FALSE
Ca21chr2_C_albicans_SC5314	975822	Ca21chr2_C_albicans_SC5314	959541	Ca21chr2_C_albicans_SC5314975822	Ca21chr2_C_albicans_SC5314959541				Ca21chr2_C_albicans_SC5314975822			FALSE
Ca21chr2_C_albicans_SC5314	975833	Ca21chr2_C_albicans_SC5314	967286	Ca21chr2_C_albicans_SC5314975833	Ca21chr2_C_albicans_SC5314967286				Ca21chr2_C_albicans_SC5314975833			FALSE
Ca21chr2_C_albicans_SC5314	977145	Ca21chr2_C_albicans_SC5314	967848	Ca21chr2_C_albicans_SC5314977145	Ca21chr2_C_albicans_SC5314967848				Ca21chr2_C_albicans_SC5314977145			FALSE
Ca21chr2_C_albicans_SC5314	977154	Ca21chr2_C_albicans_SC5314	971875	Ca21chr2_C_albicans_SC5314977154	Ca21chr2_C_albicans_SC5314971875				Ca21chr2_C_albicans_SC5314977154			FALSE
Ca21chr2_C_albicans_SC5314	977318	Ca21chr2_C_albicans_SC5314	971883	Ca21chr2_C_albicans_SC5314977318	Ca21chr2_C_albicans_SC5314971883				Ca21chr2_C_albicans_SC5314977318			FALSE
Ca21chr2_C_albicans_SC5314	977321	Ca21chr2_C_albicans_SC5314	972044	Ca21chr2_C_albicans_SC5314977321	Ca21chr2_C_albicans_SC5314972044				Ca21chr2_C_albicans_SC5314977321			FALSE
Ca21chr2_C_albicans_SC5314	978289	Ca21chr2_C_albicans_SC5314	972047	Ca21chr2_C_albicans_SC5314978289	Ca21chr2_C_albicans_SC5314972047				Ca21chr2_C_albicans_SC5314978289			FALSE
Ca21chr2_C_albicans_SC5314	978315	Ca21chr2_C_albicans_SC5314	972050	Ca21chr2_C_albicans_SC5314978315	Ca21chr2_C_albicans_SC5314972050				Ca21chr2_C_albicans_SC5314978315			FALSE
Ca21chr2_C_albicans_SC5314	978318	Ca21chr2_C_albicans_SC5314	972053	Ca21chr2_C_albicans_SC5314978318	Ca21chr2_C_albicans_SC5314972053				Ca21chr2_C_albicans_SC5314978318			FALSE
Ca21chr2_C_albicans_SC5314	978322	Ca21chr2_C_albicans_SC5314	972065	Ca21chr2_C_albicans_SC5314978322	Ca21chr2_C_albicans_SC5314972065				Ca21chr2_C_albicans_SC5314978322			FALSE
Ca21chr2_C_albicans_SC5314	978379	Ca21chr2_C_albicans_SC5314	972071	Ca21chr2_C_albicans_SC5314978379	Ca21chr2_C_albicans_SC5314972071				Ca21chr2_C_albicans_SC5314978379			FALSE
Ca21chr2_C_albicans_SC5314	978420	Ca21chr2_C_albicans_SC5314	972074	Ca21chr2_C_albicans_SC5314978420	Ca21chr2_C_albicans_SC5314972074				Ca21chr2_C_albicans_SC5314978420			FALSE
Ca21chr2_C_albicans_SC5314	980383	Ca21chr2_C_albicans_SC5314	972266	Ca21chr2_C_albicans_SC5314980383	Ca21chr2_C_albicans_SC5314972266				Ca21chr2_C_albicans_SC5314980383			FALSE
Ca21chr2_C_albicans_SC5314	980386	Ca21chr2_C_albicans_SC5314	972268	Ca21chr2_C_albicans_SC5314980386	Ca21chr2_C_albicans_SC5314972268				Ca21chr2_C_albicans_SC5314980386			FALSE
Ca21chr2_C_albicans_SC5314	980387	Ca21chr2_C_albicans_SC5314	972271	Ca21chr2_C_albicans_SC5314980387	Ca21chr2_C_albicans_SC5314972271				Ca21chr2_C_albicans_SC5314980387			FALSE
Ca21chr2_C_albicans_SC5314	980405	Ca21chr2_C_albicans_SC5314	972289	Ca21chr2_C_albicans_SC5314980405	Ca21chr2_C_albicans_SC5314972289				Ca21chr2_C_albicans_SC5314980405			FALSE
Ca21chr2_C_albicans_SC5314	980418	Ca21chr2_C_albicans_SC5314	972292	Ca21chr2_C_albicans_SC5314980418	Ca21chr2_C_albicans_SC5314972292				Ca21chr2_C_albicans_SC5314980418			FALSE
Ca21chr2_C_albicans_SC5314	980429	Ca21chr2_C_albicans_SC5314	972295	Ca21chr2_C_albicans_SC5314980429	Ca21chr2_C_albicans_SC5314972295				Ca21chr2_C_albicans_SC5314980429			FALSE
Ca21chr2_C_albicans_SC5314	983879	Ca21chr2_C_albicans_SC5314	972309	Ca21chr2_C_albicans_SC5314983879	Ca21chr2_C_albicans_SC5314972309				Ca21chr2_C_albicans_SC5314983879			FALSE
Ca21chr2_C_albicans_SC5314	983933	Ca21chr2_C_albicans_SC5314	972328	Ca21chr2_C_albicans_SC5314983933	Ca21chr2_C_albicans_SC5314972328				Ca21chr2_C_albicans_SC5314983933			FALSE
Ca21chr2_C_albicans_SC5314	984414	Ca21chr2_C_albicans_SC5314	972330	Ca21chr2_C_albicans_SC5314984414	Ca21chr2_C_albicans_SC5314972330				Ca21chr2_C_albicans_SC5314984414			FALSE
Ca21chr2_C_albicans_SC5314	984431	Ca21chr2_C_albicans_SC5314	972335	Ca21chr2_C_albicans_SC5314984431	Ca21chr2_C_albicans_SC5314972335				Ca21chr2_C_albicans_SC5314984431			FALSE
Ca21chr2_C_albicans_SC5314	985096	Ca21chr2_C_albicans_SC5314	972336	Ca21chr2_C_albicans_SC5314985096	Ca21chr2_C_albicans_SC5314972336				Ca21chr2_C_albicans_SC5314985096			FALSE
Ca21chr2_C_albicans_SC5314	985229	Ca21chr2_C_albicans_SC5314	972347	Ca21chr2_C_albicans_SC5314985229	Ca21chr2_C_albicans_SC5314972347				Ca21chr2_C_albicans_SC5314985229			FALSE
Ca21chr2_C_albicans_SC5314	985323	Ca21chr2_C_albicans_SC5314	973296	Ca21chr2_C_albicans_SC5314985323	Ca21chr2_C_albicans_SC5314973296				Ca21chr2_C_albicans_SC5314985323			FALSE
Ca21chr2_C_albicans_SC5314	985497	Ca21chr2_C_albicans_SC5314	974043	Ca21chr2_C_albicans_SC5314985497	Ca21chr2_C_albicans_SC5314974043				Ca21chr2_C_albicans_SC5314985497			FALSE
Ca21chr2_C_albicans_SC5314	985538	Ca21chr2_C_albicans_SC5314	974095	Ca21chr2_C_albicans_SC5314985538	Ca21chr2_C_albicans_SC5314974095				Ca21chr2_C_albicans_SC5314985538			FALSE
Ca21chr2_C_albicans_SC5314	985818	Ca21chr2_C_albicans_SC5314	974200	Ca21chr2_C_albicans_SC5314985818	Ca21chr2_C_albicans_SC5314974200				Ca21chr2_C_albicans_SC5314985818			FALSE
Ca21chr2_C_albicans_SC5314	985875	Ca21chr2_C_albicans_SC5314	974210	Ca21chr2_C_albicans_SC5314985875	Ca21chr2_C_albicans_SC5314974210				Ca21chr2_C_albicans_SC5314985875			FALSE
Ca21chr2_C_albicans_SC5314	986073	Ca21chr2_C_albicans_SC5314	974645	Ca21chr2_C_albicans_SC5314986073	Ca21chr2_C_albicans_SC5314974645				Ca21chr2_C_albicans_SC5314986073			FALSE
Ca21chr2_C_albicans_SC5314	986625	Ca21chr2_C_albicans_SC5314	974768	Ca21chr2_C_albicans_SC5314986625	Ca21chr2_C_albicans_SC5314974768				Ca21chr2_C_albicans_SC5314986625			FALSE
Ca21chr2_C_albicans_SC5314	991770	Ca21chr2_C_albicans_SC5314	974786	Ca21chr2_C_albicans_SC5314991770	Ca21chr2_C_albicans_SC5314974786				Ca21chr2_C_albicans_SC5314991770			FALSE
Ca21chr2_C_albicans_SC5314	992751	Ca21chr2_C_albicans_SC5314	975822	Ca21chr2_C_albicans_SC5314992751	Ca21chr2_C_albicans_SC5314975822				Ca21chr2_C_albicans_SC5314992751			FALSE
Ca21chr2_C_albicans_SC5314	993444	Ca21chr2_C_albicans_SC5314	975833	Ca21chr2_C_albicans_SC5314993444	Ca21chr2_C_albicans_SC5314975833				Ca21chr2_C_albicans_SC5314993444			FALSE
Ca21chr2_C_albicans_SC5314	993516	Ca21chr2_C_albicans_SC5314	977145	Ca21chr2_C_albicans_SC5314993516	Ca21chr2_C_albicans_SC5314977145				Ca21chr2_C_albicans_SC5314993516			FALSE
Ca21chr2_C_albicans_SC5314	993553	Ca21chr2_C_albicans_SC5314	977154	Ca21chr2_C_albicans_SC5314993553	Ca21chr2_C_albicans_SC5314977154				Ca21chr2_C_albicans_SC5314993553			FALSE
Ca21chr2_C_albicans_SC5314	995639	Ca21chr2_C_albicans_SC5314	977318	Ca21chr2_C_albicans_SC5314995639	Ca21chr2_C_albicans_SC5314977318				Ca21chr2_C_albicans_SC5314995639			FALSE
Ca21chr2_C_albicans_SC5314	995963	Ca21chr2_C_albicans_SC5314	977321	Ca21chr2_C_albicans_SC5314995963	Ca21chr2_C_albicans_SC5314977321				Ca21chr2_C_albicans_SC5314995963			FALSE
Ca21chr2_C_albicans_SC5314	996954	Ca21chr2_C_albicans_SC5314	978289	Ca21chr2_C_albicans_SC5314996954	Ca21chr2_C_albicans_SC5314978289				Ca21chr2_C_albicans_SC5314996954			FALSE
Ca21chr2_C_albicans_SC5314	998025	Ca21chr2_C_albicans_SC5314	978315	Ca21chr2_C_albicans_SC5314998025	Ca21chr2_C_albicans_SC5314978315				Ca21chr2_C_albicans_SC5314998025			FALSE
Ca21chr2_C_albicans_SC5314	998085	Ca21chr2_C_albicans_SC5314	978318	Ca21chr2_C_albicans_SC5314998085	Ca21chr2_C_albicans_SC5314978318				Ca21chr2_C_albicans_SC5314998085			FALSE
Ca21chr2_C_albicans_SC5314	998598	Ca21chr2_C_albicans_SC5314	978322	Ca21chr2_C_albicans_SC5314998598	Ca21chr2_C_albicans_SC5314978322				Ca21chr2_C_albicans_SC5314998598			FALSE
Ca21chr2_C_albicans_SC5314	999687	Ca21chr2_C_albicans_SC5314	978379	Ca21chr2_C_albicans_SC5314999687	Ca21chr2_C_albicans_SC5314978379				Ca21chr2_C_albicans_SC5314999687			FALSE
Ca21chr2_C_albicans_SC5314	1001180	Ca21chr2_C_albicans_SC5314	978420	Ca21chr2_C_albicans_SC53141001180	Ca21chr2_C_albicans_SC5314978420				Ca21chr2_C_albicans_SC53141001180			FALSE
Ca21chr2_C_albicans_SC5314	1001273	Ca21chr2_C_albicans_SC5314	980383	Ca21chr2_C_albicans_SC53141001273	Ca21chr2_C_albicans_SC5314980383				Ca21chr2_C_albicans_SC53141001273			FALSE
Ca21chr2_C_albicans_SC5314	1001759	Ca21chr2_C_albicans_SC5314	980386	Ca21chr2_C_albicans_SC53141001759	Ca21chr2_C_albicans_SC5314980386				Ca21chr2_C_albicans_SC53141001759			FALSE
[truncated: 1,773 more rows]

## Sheet: Sheet2
Table S8. Comparison of two sequence runs of the ancestral C. albicans strain CaLC660
NEW CaLC660 run, HOM variants (SC5314)			Previous CaLC660 run, HOM variants (SC5314)
Chromosome	SNP coordinate		Chromosome	SNP coordinate
Ca21chr1_C_albicans_SC5314	43483		Ca21chr1_C_albicans_SC5314	43483		Total absent	50
Ca21chr1_C_albicans_SC5314	43503		Ca21chr1_C_albicans_SC5314	43503		Total SNV	3748
Ca21chr1_C_albicans_SC5314	44018		Ca21chr1_C_albicans_SC5314	44018		% identical	99.9867
Ca21chr1_C_albicans_SC5314	44043		Ca21chr1_C_albicans_SC5314	44043
Ca21chr1_C_albicans_SC5314	80145		Ca21chr1_C_albicans_SC5314	80145
Ca21chr1_C_albicans_SC5314	151586		Ca21chr1_C_albicans_SC5314	151586
Ca21chr1_C_albicans_SC5314	151589		Ca21chr1_C_albicans_SC5314	151589
Ca21chr1_C_albicans_SC5314	151606		Ca21chr1_C_albicans_SC5314	151606
Ca21chr1_C_albicans_SC5314	170771		Ca21chr1_C_albicans_SC5314	170771
Ca21chr1_C_albicans_SC5314	170894		Ca21chr1_C_albicans_SC5314	170894
Ca21chr1_C_albicans_SC5314	280688		Ca21chr1_C_albicans_SC5314	280688
Ca21chr1_C_albicans_SC5314	300374		Ca21chr1_C_albicans_SC5314	300374
Ca21chr1_C_albicans_SC5314	300375		Ca21chr1_C_albicans_SC5314	300375
Ca21chr1_C_albicans_SC5314	327106		Ca21chr1_C_albicans_SC5314	327106
Ca21chr1_C_albicans_SC5314	327107		Ca21chr1_C_albicans_SC5314	327107
Ca21chr1_C_albicans_SC5314	327108		Ca21chr1_C_albicans_SC5314	327108
Ca21chr1_C_albicans_SC5314	327211		Ca21chr1_C_albicans_SC5314	327211
Ca21chr1_C_albicans_SC5314	327224		Ca21chr1_C_albicans_SC5314	327224
Ca21chr1_C_albicans_SC5314	327255		Ca21chr1_C_albicans_SC5314	327255
Ca21chr1_C_albicans_SC5314	327290		Ca21chr1_C_albicans_SC5314	327290
Ca21chr1_C_albicans_SC5314	327321		Ca21chr1_C_albicans_SC5314	327321
Ca21chr1_C_albicans_SC5314	337595		Ca21chr1_C_albicans_SC5314	337548
Ca21chr1_C_albicans_SC5314	337599		Ca21chr1_C_albicans_SC5314	337595
Ca21chr1_C_albicans_SC5314	337601		Ca21chr1_C_albicans_SC5314	337599
Ca21chr1_C_albicans_SC5314	337605		Ca21chr1_C_albicans_SC5314	337601
Ca21chr1_C_albicans_SC5314	365685		Ca21chr1_C_albicans_SC5314	337605
Ca21chr1_C_albicans_SC5314	365703		Ca21chr1_C_albicans_SC5314	365685
Ca21chr1_C_albicans_SC5314	365827		Ca21chr1_C_albicans_SC5314	365703
Ca21chr1_C_albicans_SC5314	365837		Ca21chr1_C_albicans_SC5314	365827
Ca21chr1_C_albicans_SC5314	368392		Ca21chr1_C_albicans_SC5314	365837
Ca21chr1_C_albicans_SC5314	373405		Ca21chr1_C_albicans_SC5314	368392
Ca21chr1_C_albicans_SC5314	398627		Ca21chr1_C_albicans_SC5314	373405
Ca21chr1_C_albicans_SC5314	398734		Ca21chr1_C_albicans_SC5314	398627
Ca21chr1_C_albicans_SC5314	477378		Ca21chr1_C_albicans_SC5314	398734
Ca21chr1_C_albicans_SC5314	477476		Ca21chr1_C_albicans_SC5314	477378
Ca21chr1_C_albicans_SC5314	477519		Ca21chr1_C_albicans_SC5314	477476
Ca21chr1_C_albicans_SC5314	483579		Ca21chr1_C_albicans_SC5314	477519
Ca21chr1_C_albicans_SC5314	483581		Ca21chr1_C_albicans_SC5314	483579
Ca21chr1_C_albicans_SC5314	485450		Ca21chr1_C_albicans_SC5314	483581
Ca21chr1_C_albicans_SC5314	485534		Ca21chr1_C_albicans_SC5314	485383
Ca21chr1_C_albicans_SC5314	485536		Ca21chr1_C_albicans_SC5314	485450
Ca21chr1_C_albicans_SC5314	485537		Ca21chr1_C_albicans_SC5314	485534
Ca21chr1_C_albicans_SC5314	485560		Ca21chr1_C_albicans_SC5314	485536
Ca21chr1_C_albicans_SC5314	485627		Ca21chr1_C_albicans_SC5314	485537
Ca21chr1_C_albicans_SC5314	521734		Ca21chr1_C_albicans_SC5314	485560
Ca21chr1_C_albicans_SC5314	533354		Ca21chr1_C_albicans_SC5314	485627
Ca21chr1_C_albicans_SC5314	533413		Ca21chr1_C_albicans_SC5314	521734
Ca21chr1_C_albicans_SC5314	533432		Ca21chr1_C_albicans_SC5314	533354
Ca21chr1_C_albicans_SC5314	584499		Ca21chr1_C_albicans_SC5314	533413
Ca21chr1_C_albicans_SC5314	584500		Ca21chr1_C_albicans_SC5314	533432
Ca21chr1_C_albicans_SC5314	584516		Ca21chr1_C_albicans_SC5314	584499
Ca21chr1_C_albicans_SC5314	584517		Ca21chr1_C_albicans_SC5314	584500
Ca21chr1_C_albicans_SC5314	584525		Ca21chr1_C_albicans_SC5314	584516
Ca21chr1_C_albicans_SC5314	593911		Ca21chr1_C_albicans_SC5314	584517
Ca21chr1_C_albicans_SC5314	609875		Ca21chr1_C_albicans_SC5314	584525
Ca21chr1_C_albicans_SC5314	781998		Ca21chr1_C_albicans_SC5314	593911
Ca21chr1_C_albicans_SC5314	801810		Ca21chr1_C_albicans_SC5314	609875
Ca21chr1_C_albicans_SC5314	801817		Ca21chr1_C_albicans_SC5314	781998
Ca21chr1_C_albicans_SC5314	801826		Ca21chr1_C_albicans_SC5314	801810
Ca21chr1_C_albicans_SC5314	801829		Ca21chr1_C_albicans_SC5314	801817
Ca21chr1_C_albicans_SC5314	801834		Ca21chr1_C_albicans_SC5314	801826
Ca21chr1_C_albicans_SC5314	801880		Ca21chr1_C_albicans_SC5314	801829
Ca21chr1_C_albicans_SC5314	802007		Ca21chr1_C_albicans_SC5314	801834
Ca21chr1_C_albicans_SC5314	830018		Ca21chr1_C_albicans_SC5314	801880
Ca21chr1_C_albicans_SC5314	830020		Ca21chr1_C_albicans_SC5314	802007
Ca21chr1_C_albicans_SC5314	830021		Ca21chr1_C_albicans_SC5314	830018
Ca21chr1_C_albicans_SC5314	830048		Ca21chr1_C_albicans_SC5314	830020
Ca21chr1_C_albicans_SC5314	832548		Ca21chr1_C_albicans_SC5314	830021
Ca21chr1_C_albicans_SC5314	840234		Ca21chr1_C_albicans_SC5314	830048
Ca21chr1_C_albicans_SC5314	850518		Ca21chr1_C_albicans_SC5314	832548
Ca21chr1_C_albicans_SC5314	855069		Ca21chr1_C_albicans_SC5314	840234
Ca21chr1_C_albicans_SC5314	855085		Ca21chr1_C_albicans_SC5314	850518
Ca21chr1_C_albicans_SC5314	855146		Ca21chr1_C_albicans_SC5314	855146
Ca21chr1_C_albicans_SC5314	855147		Ca21chr1_C_albicans_SC5314	855147
Ca21chr1_C_albicans_SC5314	855179		Ca21chr1_C_albicans_SC5314	855179
Ca21chr1_C_albicans_SC5314	855180		Ca21chr1_C_albicans_SC5314	855180
Ca21chr1_C_albicans_SC5314	855181		Ca21chr1_C_albicans_SC5314	855181
Ca21chr1_C_albicans_SC5314	855202		Ca21chr1_C_albicans_SC5314	855202
Ca21chr1_C_albicans_SC5314	855427		Ca21chr1_C_albicans_SC5314	855992
Ca21chr1_C_albicans_SC5314	855992		Ca21chr1_C_albicans_SC5314	855993
Ca21chr1_C_albicans_SC5314	855993		Ca21chr1_C_albicans_SC5314	862572
Ca21chr1_C_albicans_SC5314	862572		Ca21chr1_C_albicans_SC5314	866448
Ca21chr1_C_albicans_SC5314	866448		Ca21chr1_C_albicans_SC5314	870104
Ca21chr1_C_albicans_SC5314	870104		Ca21chr1_C_albicans_SC5314	870107
Ca21chr1_C_albicans_SC5314	870107		Ca21chr1_C_albicans_SC5314	870115
Ca21chr1_C_albicans_SC5314	870115		Ca21chr1_C_albicans_SC5314	872699
Ca21chr1_C_albicans_SC5314	872699		Ca21chr1_C_albicans_SC5314	872741
Ca21chr1_C_albicans_SC5314	872741		Ca21chr1_C_albicans_SC5314	875084
Ca21chr1_C_albicans_SC5314	875084		Ca21chr1_C_albicans_SC5314	883224
Ca21chr1_C_albicans_SC5314	883224		Ca21chr1_C_albicans_SC5314	956393
Ca21chr1_C_albicans_SC5314	956393		Ca21chr1_C_albicans_SC5314	975103
Ca21chr1_C_albicans_SC5314	975103		Ca21chr1_C_albicans_SC5314	1008275
Ca21chr1_C_albicans_SC5314	1008275		Ca21chr1_C_albicans_SC5314	1083687
Ca21chr1_C_albicans_SC5314	1083687		Ca21chr1_C_albicans_SC5314	1097488
Ca21chr1_C_albicans_SC5314	1097488		Ca21chr1_C_albicans_SC5314	1149587
Ca21chr1_C_albicans_SC5314	1149587		Ca21chr1_C_albicans_SC5314	1149614
Ca21chr1_C_albicans_SC5314	1149614		Ca21chr1_C_albicans_SC5314	1149617
Ca21chr1_C_albicans_SC5314	1149617		Ca21chr1_C_albicans_SC5314	1149618
Ca21chr1_C_albicans_SC5314	1149618		Ca21chr1_C_albicans_SC5314	1159059
Ca21chr1_C_albicans_SC5314	1159059		Ca21chr1_C_albicans_SC5314	1166933
Ca21chr1_C_albicans_SC5314	1166933		Ca21chr1_C_albicans_SC5314	1166944
Ca21chr1_C_albicans_SC5314	1166944		Ca21chr1_C_albicans_SC5314	1167010
Ca21chr1_C_albicans_SC5314	1167010		Ca21chr1_C_albicans_SC5314	1191727
Ca21chr1_C_albicans_SC5314	1191727		Ca21chr1_C_albicans_SC5314	1195980
Ca21chr1_C_albicans_SC5314	1195980		Ca21chr1_C_albicans_SC5314	1198091
Ca21chr1_C_albicans_SC5314	1198091		Ca21chr1_C_albicans_SC5314	1198093
Ca21chr1_C_albicans_SC5314	1198093		Ca21chr1_C_albicans_SC5314	1198101
Ca21chr1_C_albicans_SC5314	1198101		Ca21chr1_C_albicans_SC5314	1198122
Ca21chr1_C_albicans_SC5314	1198122		Ca21chr1_C_albicans_SC5314	1198135
Ca21chr1_C_albicans_SC5314	1198135		Ca21chr1_C_albicans_SC5314	1206267
Ca21chr1_C_albicans_SC5314	1206267		Ca21chr1_C_albicans_SC5314	1208618
Ca21chr1_C_albicans_SC5314	1208618		Ca21chr1_C_albicans_SC5314	1237828
Ca21chr1_C_albicans_SC5314	1237828		Ca21chr1_C_albicans_SC5314	1237830
Ca21chr1_C_albicans_SC5314	1237830		Ca21chr1_C_albicans_SC5314	1254964
Ca21chr1_C_albicans_SC5314	1254964		Ca21chr1_C_albicans_SC5314	1270141
Ca21chr1_C_albicans_SC5314	1270141		Ca21chr1_C_albicans_SC5314	1277404
Ca21chr1_C_albicans_SC5314	1277404		Ca21chr1_C_albicans_SC5314	1277411
Ca21chr1_C_albicans_SC5314	1277411		Ca21chr1_C_albicans_SC5314	1277435
Ca21chr1_C_albicans_SC5314	1277435		Ca21chr1_C_albicans_SC5314	1293558
Ca21chr1_C_albicans_SC5314	1283542		Ca21chr1_C_albicans_SC5314	1293635
Ca21chr1_C_albicans_SC5314	1293558		Ca21chr1_C_albicans_SC5314	1293651
Ca21chr1_C_albicans_SC5314	1293635		Ca21chr1_C_albicans_SC5314	1293656
Ca21chr1_C_albicans_SC5314	1293651		Ca21chr1_C_albicans_SC5314	1293662
Ca21chr1_C_albicans_SC5314	1293656		Ca21chr1_C_albicans_SC5314	1315307
Ca21chr1_C_albicans_SC5314	1293662		Ca21chr1_C_albicans_SC5314	1340656
Ca21chr1_C_albicans_SC5314	1315307		Ca21chr1_C_albicans_SC5314	1346366
Ca21chr1_C_albicans_SC5314	1340656		Ca21chr1_C_albicans_SC5314	1346384
Ca21chr1_C_albicans_SC5314	1346366		Ca21chr1_C_albicans_SC5314	1346389
Ca21chr1_C_albicans_SC5314	1346384		Ca21chr1_C_albicans_SC5314	1346405
Ca21chr1_C_albicans_SC5314	1346389		Ca21chr1_C_albicans_SC5314	1360279
Ca21chr1_C_albicans_SC5314	1346405		Ca21chr1_C_albicans_SC5314	1360304
Ca21chr1_C_albicans_SC5314	1360279		Ca21chr1_C_albicans_SC5314	1360305
Ca21chr1_C_albicans_SC5314	1360304		Ca21chr1_C_albicans_SC5314	1361764
Ca21chr1_C_albicans_SC5314	1360305		Ca21chr1_C_albicans_SC5314	1361765
Ca21chr1_C_albicans_SC5314	1361764		Ca21chr1_C_albicans_SC5314	1361775
Ca21chr1_C_albicans_SC5314	1361765		Ca21chr1_C_albicans_SC5314	1365390
Ca21chr1_C_albicans_SC5314	1361775		Ca21chr1_C_albicans_SC5314	1365393
Ca21chr1_C_albicans_SC5314	1365390		Ca21chr1_C_albicans_SC5314	1365440
Ca21chr1_C_albicans_SC5314	1365393		Ca21chr1_C_albicans_SC5314	1365486
Ca21chr1_C_albicans_SC5314	1365440		Ca21chr1_C_albicans_SC5314	1365494
Ca21chr1_C_albicans_SC5314	1365486		Ca21chr1_C_albicans_SC5314	1365529
Ca21chr1_C_albicans_SC5314	1365494		Ca21chr1_C_albicans_SC5314	1365597
Ca21chr1_C_albicans_SC5314	1365529		Ca21chr1_C_albicans_SC5314	1365601
Ca21chr1_C_albicans_SC5314	1365597		Ca21chr1_C_albicans_SC5314	1365607
Ca21chr1_C_albicans_SC5314	1365601		Ca21chr1_C_albicans_SC5314	1365623
Ca21chr1_C_albicans_SC5314	1365607		Ca21chr1_C_albicans_SC5314	1365630
Ca21chr1_C_albicans_SC5314	1365630		Ca21chr1_C_albicans_SC5314	1365636
Ca21chr1_C_albicans_SC5314	1365636		Ca21chr1_C_albicans_SC5314	1365640
Ca21chr1_C_albicans_SC5314	1365640		Ca21chr1_C_albicans_SC5314	1365703
Ca21chr1_C_albicans_SC5314	1365703		Ca21chr1_C_albicans_SC5314	1365707
Ca21chr1_C_albicans_SC5314	1365707		Ca21chr1_C_albicans_SC5314	1365710
Ca21chr1_C_albicans_SC5314	1365710		Ca21chr1_C_albicans_SC5314	1420518
Ca21chr1_C_albicans_SC5314	1420518		Ca21chr1_C_albicans_SC5314	1420520
Ca21chr1_C_albicans_SC5314	1420520		Ca21chr1_C_albicans_SC5314	1428617
Ca21chr1_C_albicans_SC5314	1428617		Ca21chr1_C_albicans_SC5314	1428675
Ca21chr1_C_albicans_SC5314	1428675		Ca21chr1_C_albicans_SC5314	1432318
Ca21chr1_C_albicans_SC5314	1432318		Ca21chr1_C_albicans_SC5314	1432870
Ca21chr1_C_albicans_SC5314	1432870		Ca21chr1_C_albicans_SC5314	1432899
Ca21chr1_C_albicans_SC5314	1432899		Ca21chr1_C_albicans_SC5314	1432906
Ca21chr1_C_albicans_SC5314	1432906		Ca21chr1_C_albicans_SC5314	1432907
Ca21chr1_C_albicans_SC5314	1432907		Ca21chr1_C_albicans_SC5314	1432953
Ca21chr1_C_albicans_SC5314	1432953		Ca21chr1_C_albicans_SC5314	1432956
Ca21chr1_C_albicans_SC5314	1432956		Ca21chr1_C_albicans_SC5314	1432958
Ca21chr1_C_albicans_SC5314	1432958		Ca21chr1_C_albicans_SC5314	1432960
Ca21chr1_C_albicans_SC5314	1432960		Ca21chr1_C_albicans_SC5314	1432965
Ca21chr1_C_albicans_SC5314	1432965		Ca21chr1_C_albicans_SC5314	1432966
Ca21chr1_C_albicans_SC5314	1432966		Ca21chr1_C_albicans_SC5314	1432969
Ca21chr1_C_albicans_SC5314	1432969		Ca21chr1_C_albicans_SC5314	1432970
Ca21chr1_C_albicans_SC5314	1432970		Ca21chr1_C_albicans_SC5314	1432979
Ca21chr1_C_albicans_SC5314	1432979		Ca21chr1_C_albicans_SC5314	1460393
Ca21chr1_C_albicans_SC5314	1460393		Ca21chr1_C_albicans_SC5314	1467993
Ca21chr1_C_albicans_SC5314	1467993		Ca21chr1_C_albicans_SC5314	1498277
Ca21chr1_C_albicans_SC5314	1498264		Ca21chr1_C_albicans_SC5314	1498296
Ca21chr1_C_albicans_SC5314	1498265		Ca21chr1_C_albicans_SC5314	1498304
Ca21chr1_C_albicans_SC5314	1498277		Ca21chr1_C_albicans_SC5314	1498305
Ca21chr1_C_albicans_SC5314	1498296		Ca21chr1_C_albicans_SC5314	1498312
Ca21chr1_C_albicans_SC5314	1498304		Ca21chr1_C_albicans_SC5314	1498313
Ca21chr1_C_albicans_SC5314	1498305		Ca21chr1_C_albicans_SC5314	1498322
Ca21chr1_C_albicans_SC5314	1498312		Ca21chr1_C_albicans_SC5314	1498323
Ca21chr1_C_albicans_SC5314	1498313		Ca21chr1_C_albicans_SC5314	1498346
Ca21chr1_C_albicans_SC5314	1498322		Ca21chr1_C_albicans_SC5314	1519520
Ca21chr1_C_albicans_SC5314	1498323		Ca21chr1_C_albicans_SC5314	1580331
Ca21chr1_C_albicans_SC5314	1498346		Ca21chr1_C_albicans_SC5314	1626078
Ca21chr1_C_albicans_SC5314	1519520		Ca21chr1_C_albicans_SC5314	1652337
Ca21chr1_C_albicans_SC5314	1580331		Ca21chr1_C_albicans_SC5314	1652375
Ca21chr1_C_albicans_SC5314	1626078		Ca21chr1_C_albicans_SC5314	1670790
Ca21chr1_C_albicans_SC5314	1652337		Ca21chr1_C_albicans_SC5314	1671432
Ca21chr1_C_albicans_SC5314	1652375		Ca21chr1_C_albicans_SC5314	1671540
Ca21chr1_C_albicans_SC5314	1670790		Ca21chr1_C_albicans_SC5314	1671544
Ca21chr1_C_albicans_SC5314	1671432		Ca21chr1_C_albicans_SC5314	1671552
Ca21chr1_C_albicans_SC5314	1671540		Ca21chr1_C_albicans_SC5314	1716589
Ca21chr1_C_albicans_SC5314	1671544		Ca21chr1_C_albicans_SC5314	1716591
Ca21chr1_C_albicans_SC5314	1671552		Ca21chr1_C_albicans_SC5314	1716611
Ca21chr1_C_albicans_SC5314	1716589		Ca21chr1_C_albicans_SC5314	1716616
Ca21chr1_C_albicans_SC5314	1716591		Ca21chr1_C_albicans_SC5314	1716649
Ca21chr1_C_albicans_SC5314	1716611		Ca21chr1_C_albicans_SC5314	1716650
Ca21chr1_C_albicans_SC5314	1716616		Ca21chr1_C_albicans_SC5314	1716651
Ca21chr1_C_albicans_SC5314	1716649		Ca21chr1_C_albicans_SC5314	1716658
Ca21chr1_C_albicans_SC5314	1716650		Ca21chr1_C_albicans_SC5314	1716660
Ca21chr1_C_albicans_SC5314	1716651		Ca21chr1_C_albicans_SC5314	1716661
Ca21chr1_C_albicans_SC5314	1716658		Ca21chr1_C_albicans_SC5314	1716666
Ca21chr1_C_albicans_SC5314	1716660		Ca21chr1_C_albicans_SC5314	1716667
Ca21chr1_C_albicans_SC5314	1716661		Ca21chr1_C_albicans_SC5314	1716672
Ca21chr1_C_albicans_SC5314	1716666		Ca21chr1_C_albicans_SC5314	1716679
Ca21chr1_C_albicans_SC5314	1716667		Ca21chr1_C_albicans_SC5314	1716682
Ca21chr1_C_albicans_SC5314	1716672		Ca21chr1_C_albicans_SC5314	1716684
Ca21chr1_C_albicans_SC5314	1716679		Ca21chr1_C_albicans_SC5314	1716685
Ca21chr1_C_albicans_SC5314	1716682		Ca21chr1_C_albicans_SC5314	1716693
Ca21chr1_C_albicans_SC5314	1716684		Ca21chr1_C_albicans_SC5314	1716694
Ca21chr1_C_albicans_SC5314	1716685		Ca21chr1_C_albicans_SC5314	1716695
Ca21chr1_C_albicans_SC5314	1716693		Ca21chr1_C_albicans_SC5314	1716700
Ca21chr1_C_albicans_SC5314	1716694		Ca21chr1_C_albicans_SC5314	1716701
Ca21chr1_C_albicans_SC5314	1716695		Ca21chr1_C_albicans_SC5314	1716707
Ca21chr1_C_albicans_SC5314	1716700		Ca21chr1_C_albicans_SC5314	1716710
Ca21chr1_C_albicans_SC5314	1716701		Ca21chr1_C_albicans_SC5314	1716711
Ca21chr1_C_albicans_SC5314	1716707		Ca21chr1_C_albicans_SC5314	1716714
Ca21chr1_C_albicans_SC5314	1716710		Ca21chr1_C_albicans_SC5314	1716718
Ca21chr1_C_albicans_SC5314	1716711		Ca21chr1_C_albicans_SC5314	1726431
Ca21chr1_C_albicans_SC5314	1716714		Ca21chr1_C_albicans_SC5314	1734731
Ca21chr1_C_albicans_SC5314	1716718		Ca21chr1_C_albicans_SC5314	1763067
Ca21chr1_C_albicans_SC5314	1726431		Ca21chr1_C_albicans_SC5314	1763085
Ca21chr1_C_albicans_SC5314	1734731		Ca21chr1_C_albicans_SC5314	1763092
Ca21chr1_C_albicans_SC5314	1763067		Ca21chr1_C_albicans_SC5314	1763111
Ca21chr1_C_albicans_SC5314	1763085		Ca21chr1_C_albicans_SC5314	1763118
Ca21chr1_C_albicans_SC5314	1763092		Ca21chr1_C_albicans_SC5314	1763145
Ca21chr1_C_albicans_SC5314	1763111		Ca21chr1_C_albicans_SC5314	1763149
Ca21chr1_C_albicans_SC5314	1763118		Ca21chr1_C_albicans_SC5314	1763257
Ca21chr1_C_albicans_SC5314	1763145		Ca21chr1_C_albicans_SC5314	1763280
Ca21chr1_C_albicans_SC5314	1763149		Ca21chr1_C_albicans_SC5314	1763309
Ca21chr1_C_albicans_SC5314	1763257		Ca21chr1_C_albicans_SC5314	1763310
Ca21chr1_C_albicans_SC5314	1763280		Ca21chr1_C_albicans_SC5314	1775969
Ca21chr1_C_albicans_SC5314	1763309		Ca21chr1_C_albicans_SC5314	1775977
Ca21chr1_C_albicans_SC5314	1763310		Ca21chr1_C_albicans_SC5314	1811306
Ca21chr1_C_albicans_SC5314	1775969		Ca21chr1_C_albicans_SC5314	1898331
Ca21chr1_C_albicans_SC5314	1775977		Ca21chr1_C_albicans_SC5314	1898379
Ca21chr1_C_albicans_SC5314	1811306		Ca21chr1_C_albicans_SC5314	1915069
Ca21chr1_C_albicans_SC5314	1898331		Ca21chr1_C_albicans_SC5314	1915090
Ca21chr1_C_albicans_SC5314	1898379		Ca21chr1_C_albicans_SC5314	1915097
Ca21chr1_C_albicans_SC5314	1915069		Ca21chr1_C_albicans_SC5314	1915098
Ca21chr1_C_albicans_SC5314	1915090		Ca21chr1_C_albicans_SC5314	1915099
Ca21chr1_C_albicans_SC5314	1915097		Ca21chr1_C_albicans_SC5314	1922353
Ca21chr1_C_albicans_SC5314	1915098		Ca21chr1_C_albicans_SC5314	1925347
Ca21chr1_C_albicans_SC5314	1915099		Ca21chr1_C_albicans_SC5314	1925350
Ca21chr1_C_albicans_SC5314	1922353		Ca21chr1_C_albicans_SC5314	1930077
Ca21chr1_C_albicans_SC5314	1925347		Ca21chr1_C_albicans_SC5314	1992273
Ca21chr1_C_albicans_SC5314	1925350		Ca21chr1_C_albicans_SC5314	1992282
Ca21chr1_C_albicans_SC5314	1930077		Ca21chr1_C_albicans_SC5314	1992332
Ca21chr1_C_albicans_SC5314	1992273		Ca21chr1_C_albicans_SC5314	1992335
Ca21chr1_C_albicans_SC5314	1992282		Ca21chr1_C_albicans_SC5314	1992363
Ca21chr1_C_albicans_SC5314	1992332		Ca21chr1_C_albicans_SC5314	2073007
Ca21chr1_C_albicans_SC5314	1992335		Ca21chr1_C_albicans_SC5314	2103167
Ca21chr1_C_albicans_SC5314	1992363		Ca21chr1_C_albicans_SC5314	2103212
Ca21chr1_C_albicans_SC5314	2073007		Ca21chr1_C_albicans_SC5314	2103292
Ca21chr1_C_albicans_SC5314	2103167		Ca21chr1_C_albicans_SC5314	2172245
Ca21chr1_C_albicans_SC5314	2103212		Ca21chr1_C_albicans_SC5314	2172248
Ca21chr1_C_albicans_SC5314	2103292		Ca21chr1_C_albicans_SC5314	2172261
Ca21chr1_C_albicans_SC5314	2172245		Ca21chr1_C_albicans_SC5314	2172262
Ca21chr1_C_albicans_SC5314	2172248		Ca21chr1_C_albicans_SC5314	2174118
Ca21chr1_C_albicans_SC5314	2172261		Ca21chr1_C_albicans_SC5314	2174126
Ca21chr1_C_albicans_SC5314	2172262		Ca21chr1_C_albicans_SC5314	2174142
Ca21chr1_C_albicans_SC5314	2174118		Ca21chr1_C_albicans_SC5314	2174149
Ca21chr1_C_albicans_SC5314	2174126		Ca21chr1_C_albicans_SC5314	2174152
Ca21chr1_C_albicans_SC5314	2174142		Ca21chr1_C_albicans_SC5314	2174175
Ca21chr1_C_albicans_SC5314	2174149		Ca21chr1_C_albicans_SC5314	2174176
Ca21chr1_C_albicans_SC5314	2174152		Ca21chr1_C_albicans_SC5314	2174182
Ca21chr1_C_albicans_SC5314	2174175		Ca21chr1_C_albicans_SC5314	2176871
Ca21chr1_C_albicans_SC5314	2174176		Ca21chr1_C_albicans_SC5314	2196210
Ca21chr1_C_albicans_SC5314	2174182		Ca21chr1_C_albicans_SC5314	2241088
Ca21chr1_C_albicans_SC5314	2174243		Ca21chr1_C_albicans_SC5314	2241089
Ca21chr1_C_albicans_SC5314	2176871		Ca21chr1_C_albicans_SC5314	2280547
Ca21chr1_C_albicans_SC5314	2196210		Ca21chr1_C_albicans_SC5314	2280614
Ca21chr1_C_albicans_SC5314	2241088		Ca21chr1_C_albicans_SC5314	2333443
Ca21chr1_C_albicans_SC5314	2241089		Ca21chr1_C_albicans_SC5314	2400934
Ca21chr1_C_albicans_SC5314	2280547		Ca21chr1_C_albicans_SC5314	2400951
Ca21chr1_C_albicans_SC5314	2280614		Ca21chr1_C_albicans_SC5314	2494100
Ca21chr1_C_albicans_SC5314	2333443		Ca21chr1_C_albicans_SC5314	2494125
Ca21chr1_C_albicans_SC5314	2400934		Ca21chr1_C_albicans_SC5314	2494173
Ca21chr1_C_albicans_SC5314	2400951		Ca21chr1_C_albicans_SC5314	2494190
Ca21chr1_C_albicans_SC5314	2494100		Ca21chr1_C_albicans_SC5314	2494191
Ca21chr1_C_albicans_SC5314	2494125		Ca21chr1_C_albicans_SC5314	2494192
Ca21chr1_C_albicans_SC5314	2494173		Ca21chr1_C_albicans_SC5314	2494193
Ca21chr1_C_albicans_SC5314	2494190		Ca21chr1_C_albicans_SC5314	2494210
Ca21chr1_C_albicans_SC5314	2494191		Ca21chr1_C_albicans_SC5314	2494303
Ca21chr1_C_albicans_SC5314	2494192		Ca21chr1_C_albicans_SC5314	2494312
Ca21chr1_C_albicans_SC5314	2494193		Ca21chr1_C_albicans_SC5314	2494335
Ca21chr1_C_albicans_SC5314	2494210		Ca21chr1_C_albicans_SC5314	2507730
Ca21chr1_C_albicans_SC5314	2494303		Ca21chr1_C_albicans_SC5314	2545759
Ca21chr1_C_albicans_SC5314	2494312		Ca21chr1_C_albicans_SC5314	2545782
Ca21chr1_C_albicans_SC5314	2494335		Ca21chr1_C_albicans_SC5314	2558909
Ca21chr1_C_albicans_SC5314	2507730		Ca21chr1_C_albicans_SC5314	2564997
Ca21chr1_C_albicans_SC5314	2545759		Ca21chr1_C_albicans_SC5314	2568586
Ca21chr1_C_albicans_SC5314	2545782		Ca21chr1_C_albicans_SC5314	2667149
Ca21chr1_C_albicans_SC5314	2558909		Ca21chr1_C_albicans_SC5314	2667157
Ca21chr1_C_albicans_SC5314	2564997		Ca21chr1_C_albicans_SC5314	2667159
Ca21chr1_C_albicans_SC5314	2568586		Ca21chr1_C_albicans_SC5314	2667176
Ca21chr1_C_albicans_SC5314	2667149		Ca21chr1_C_albicans_SC5314	2667191
Ca21chr1_C_albicans_SC5314	2667157		Ca21chr1_C_albicans_SC5314	2667218
Ca21chr1_C_albicans_SC5314	2667159		Ca21chr1_C_albicans_SC5314	2667241
Ca21chr1_C_albicans_SC5314	2667176		Ca21chr1_C_albicans_SC5314	2670470
Ca21chr1_C_albicans_SC5314	2667191		Ca21chr1_C_albicans_SC5314	2670602
Ca21chr1_C_albicans_SC5314	2667218		Ca21chr1_C_albicans_SC5314	2700360
Ca21chr1_C_albicans_SC5314	2667241		Ca21chr1_C_albicans_SC5314	2705387
Ca21chr1_C_albicans_SC5314	2670470		Ca21chr1_C_albicans_SC5314	2705468
Ca21chr1_C_albicans_SC5314	2670602		Ca21chr1_C_albicans_SC5314	2705520
Ca21chr1_C_albicans_SC5314	2700360		Ca21chr1_C_albicans_SC5314	2705590
Ca21chr1_C_albicans_SC5314	2705387		Ca21chr1_C_albicans_SC5314	2749383
Ca21chr1_C_albicans_SC5314	2705468		Ca21chr1_C_albicans_SC5314	2749415
Ca21chr1_C_albicans_SC5314	2705520		Ca21chr1_C_albicans_SC5314	2749430
Ca21chr1_C_albicans_SC5314	2705590		Ca21chr1_C_albicans_SC5314	2749518
Ca21chr1_C_albicans_SC5314	2749383		Ca21chr1_C_albicans_SC5314	2760874
Ca21chr1_C_albicans_SC5314	2749415		Ca21chr1_C_albicans_SC5314	2760875
Ca21chr1_C_albicans_SC5314	2749430		Ca21chr1_C_albicans_SC5314	2760891
Ca21chr1_C_albicans_SC5314	2749518		Ca21chr1_C_albicans_SC5314	2761108
Ca21chr1_C_albicans_SC5314	2760874		Ca21chr1_C_albicans_SC5314	2762083
Ca21chr1_C_albicans_SC5314	2760875		Ca21chr1_C_albicans_SC5314	2762174
Ca21chr1_C_albicans_SC5314	2760891		Ca21chr1_C_albicans_SC5314	2790028
Ca21chr1_C_albicans_SC5314	2761108		Ca21chr1_C_albicans_SC5314	2790035
Ca21chr1_C_albicans_SC5314	2762083		Ca21chr1_C_albicans_SC5314	2802416
Ca21chr1_C_albicans_SC5314	2762174		Ca21chr1_C_albicans_SC5314	2802420
Ca21chr1_C_albicans_SC5314	2790028		Ca21chr1_C_albicans_SC5314	2802429
Ca21chr1_C_albicans_SC5314	2790035		Ca21chr1_C_albicans_SC5314	2802438
Ca21chr1_C_albicans_SC5314	2802416		Ca21chr1_C_albicans_SC5314	2802520
Ca21chr1_C_albicans_SC5314	2802420		Ca21chr1_C_albicans_SC5314	2859726
Ca21chr1_C_albicans_SC5314	2802429		Ca21chr1_C_albicans_SC5314	2862899
Ca21chr1_C_albicans_SC5314	2802438		Ca21chr1_C_albicans_SC5314	2882211
Ca21chr1_C_albicans_SC5314	2802520		Ca21chr1_C_albicans_SC5314	2883304
Ca21chr1_C_albicans_SC5314	2805322		Ca21chr1_C_albicans_SC5314	2883345
Ca21chr1_C_albicans_SC5314	2805328		Ca21chr1_C_albicans_SC5314	2883365
Ca21chr1_C_albicans_SC5314	2859726		Ca21chr1_C_albicans_SC5314	2888919
Ca21chr1_C_albicans_SC5314	2862899		Ca21chr1_C_albicans_SC5314	2889131
Ca21chr1_C_albicans_SC5314	2882211		Ca21chr1_C_albicans_SC5314	2889184
Ca21chr1_C_albicans_SC5314	2888919		Ca21chr1_C_albicans_SC5314	2902760
Ca21chr1_C_albicans_SC5314	2889131		Ca21chr1_C_albicans_SC5314	2903126
Ca21chr1_C_albicans_SC5314	2889184		Ca21chr1_C_albicans_SC5314	2916318
Ca21chr1_C_albicans_SC5314	2893564		Ca21chr1_C_albicans_SC5314	2916321
Ca21chr1_C_albicans_SC5314	2902760		Ca21chr1_C_albicans_SC5314	2916324
Ca21chr1_C_albicans_SC5314	2903126		Ca21chr1_C_albicans_SC5314	2945839
Ca21chr1_C_albicans_SC5314	2916318		Ca21chr1_C_albicans_SC5314	2945840
Ca21chr1_C_albicans_SC5314	2916321		Ca21chr1_C_albicans_SC5314	2945856
Ca21chr1_C_albicans_SC5314	2916324		Ca21chr1_C_albicans_SC5314	2946631
Ca21chr1_C_albicans_SC5314	2945839		Ca21chr1_C_albicans_SC5314	2947007
Ca21chr1_C_albicans_SC5314	2945840		Ca21chr1_C_albicans_SC5314	2965507
Ca21chr1_C_albicans_SC5314	2945856		Ca21chr1_C_albicans_SC5314	3180720
Ca21chr1_C_albicans_SC5314	2946631		Ca21chr1_C_albicans_SC5314	3180726
Ca21chr1_C_albicans_SC5314	2947007		Ca21chr1_C_albicans_SC5314	3180763
Ca21chr1_C_albicans_SC5314	2965507		Ca21chr1_C_albicans_SC5314	3180771
Ca21chr1_C_albicans_SC5314	3180720		Ca21chr1_C_albicans_SC5314	3180783
Ca21chr1_C_albicans_SC5314	3180726		Ca21chr1_C_albicans_SC5314	3180788
Ca21chr1_C_albicans_SC5314	3180763		Ca21chr2_C_albicans_SC5314	7218
Ca21chr1_C_albicans_SC5314	3180771		Ca21chr2_C_albicans_SC5314	7522
Ca21chr1_C_albicans_SC5314	3180783		Ca21chr2_C_albicans_SC5314	7632
Ca21chr1_C_albicans_SC5314	3180788		Ca21chr2_C_albicans_SC5314	7782
Ca21chr2_C_albicans_SC5314	7218		Ca21chr2_C_albicans_SC5314	7788
Ca21chr2_C_albicans_SC5314	7522		Ca21chr2_C_albicans_SC5314	7792
Ca21chr2_C_albicans_SC5314	7632		Ca21chr2_C_albicans_SC5314	8450
Ca21chr2_C_albicans_SC5314	7782		Ca21chr2_C_albicans_SC5314	8558
Ca21chr2_C_albicans_SC5314	7788		Ca21chr2_C_albicans_SC5314	8897
Ca21chr2_C_albicans_SC5314	7792		Ca21chr2_C_albicans_SC5314	9711
Ca21chr2_C_albicans_SC5314	8450		Ca21chr2_C_albicans_SC5314	9834
Ca21chr2_C_albicans_SC5314	8558		Ca21chr2_C_albicans_SC5314	10162
Ca21chr2_C_albicans_SC5314	8897		Ca21chr2_C_albicans_SC5314	10329
Ca21chr2_C_albicans_SC5314	9711		Ca21chr2_C_albicans_SC5314	10536
Ca21chr2_C_albicans_SC5314	9834		Ca21chr2_C_albicans_SC5314	10542
Ca21chr2_C_albicans_SC5314	10162		Ca21chr2_C_albicans_SC5314	10596
Ca21chr2_C_albicans_SC5314	10329		Ca21chr2_C_albicans_SC5314	10599
Ca21chr2_C_albicans_SC5314	10536		Ca21chr2_C_albicans_SC5314	10608
Ca21chr2_C_albicans_SC5314	10542		Ca21chr2_C_albicans_SC5314	10614
Ca21chr2_C_albicans_SC5314	10596		Ca21chr2_C_albicans_SC5314	10615
Ca21chr2_C_albicans_SC5314	10599		Ca21chr2_C_albicans_SC5314	10616
Ca21chr2_C_albicans_SC5314	10608		Ca21chr2_C_albicans_SC5314	10628
Ca21chr2_C_albicans_SC5314	10614		Ca21chr2_C_albicans_SC5314	10632
Ca21chr2_C_albicans_SC5314	10615		Ca21chr2_C_albicans_SC5314	10682
Ca21chr2_C_albicans_SC5314	10616		Ca21chr2_C_albicans_SC5314	10702
Ca21chr2_C_albicans_SC5314	10628		Ca21chr2_C_albicans_SC5314	10707
Ca21chr2_C_albicans_SC5314	10632		Ca21chr2_C_albicans_SC5314	10719
Ca21chr2_C_albicans_SC5314	10682		Ca21chr2_C_albicans_SC5314	10724
Ca21chr2_C_albicans_SC5314	10702		Ca21chr2_C_albicans_SC5314	11262
Ca21chr2_C_albicans_SC5314	10707		Ca21chr2_C_albicans_SC5314	11290
Ca21chr2_C_albicans_SC5314	10719		Ca21chr2_C_albicans_SC5314	11388
Ca21chr2_C_albicans_SC5314	10724		Ca21chr2_C_albicans_SC5314	11478
Ca21chr2_C_albicans_SC5314	11262		Ca21chr2_C_albicans_SC5314	11667
Ca21chr2_C_albicans_SC5314	11290		Ca21chr2_C_albicans_SC5314	11826
Ca21chr2_C_albicans_SC5314	11388		Ca21chr2_C_albicans_SC5314	11917
Ca21chr2_C_albicans_SC5314	11478		Ca21chr2_C_albicans_SC5314	12060
Ca21chr2_C_albicans_SC5314	11667		Ca21chr2_C_albicans_SC5314	12091
Ca21chr2_C_albicans_SC5314	11826		Ca21chr2_C_albicans_SC5314	12117
Ca21chr2_C_albicans_SC5314	11917		Ca21chr2_C_albicans_SC5314	12178
Ca21chr2_C_albicans_SC5314	12060		Ca21chr2_C_albicans_SC5314	12224
Ca21chr2_C_albicans_SC5314	12091		Ca21chr2_C_albicans_SC5314	12641
Ca21chr2_C_albicans_SC5314	12117		Ca21chr2_C_albicans_SC5314	12648
Ca21chr2_C_albicans_SC5314	12178		Ca21chr2_C_albicans_SC5314	12710
Ca21chr2_C_albicans_SC5314	12224		Ca21chr2_C_albicans_SC5314	12873
Ca21chr2_C_albicans_SC5314	12641		Ca21chr2_C_albicans_SC5314	12874
Ca21chr2_C_albicans_SC5314	12648		Ca21chr2_C_albicans_SC5314	12896
Ca21chr2_C_albicans_SC5314	12710		Ca21chr2_C_albicans_SC5314	13002
Ca21chr2_C_albicans_SC5314	12873		Ca21chr2_C_albicans_SC5314	13008
Ca21chr2_C_albicans_SC5314	12874		Ca21chr2_C_albicans_SC5314	13031
Ca21chr2_C_albicans_SC5314	12896		Ca21chr2_C_albicans_SC5314	13094
Ca21chr2_C_albicans_SC5314	13002		Ca21chr2_C_albicans_SC5314	13202
Ca21chr2_C_albicans_SC5314	13008		Ca21chr2_C_albicans_SC5314	13429
Ca21chr2_C_albicans_SC5314	13031		Ca21chr2_C_albicans_SC5314	13441
Ca21chr2_C_albicans_SC5314	13094		Ca21chr2_C_albicans_SC5314	13531
Ca21chr2_C_albicans_SC5314	13202		Ca21chr2_C_albicans_SC5314	13549
Ca21chr2_C_albicans_SC5314	13429		Ca21chr2_C_albicans_SC5314	13579
Ca21chr2_C_albicans_SC5314	13441		Ca21chr2_C_albicans_SC5314	13624
Ca21chr2_C_albicans_SC5314	13531		Ca21chr2_C_albicans_SC5314	14187
Ca21chr2_C_albicans_SC5314	13549		Ca21chr2_C_albicans_SC5314	14243
Ca21chr2_C_albicans_SC5314	13579		Ca21chr2_C_albicans_SC5314	14290
Ca21chr2_C_albicans_SC5314	13624		Ca21chr2_C_albicans_SC5314	14314
Ca21chr2_C_albicans_SC5314	14187		Ca21chr2_C_albicans_SC5314	14377
Ca21chr2_C_albicans_SC5314	14243		Ca21chr2_C_albicans_SC5314	14924
Ca21chr2_C_albicans_SC5314	14290		Ca21chr2_C_albicans_SC5314	14988
Ca21chr2_C_albicans_SC5314	14314		Ca21chr2_C_albicans_SC5314	16833
Ca21chr2_C_albicans_SC5314	14377		Ca21chr2_C_albicans_SC5314	17116
Ca21chr2_C_albicans_SC5314	14924		Ca21chr2_C_albicans_SC5314	17380
Ca21chr2_C_albicans_SC5314	14988		Ca21chr2_C_albicans_SC5314	18839
Ca21chr2_C_albicans_SC5314	16833		Ca21chr2_C_albicans_SC5314	18984
Ca21chr2_C_albicans_SC5314	17116		Ca21chr2_C_albicans_SC5314	20959
Ca21chr2_C_albicans_SC5314	17380		Ca21chr2_C_albicans_SC5314	21088
Ca21chr2_C_albicans_SC5314	18839		Ca21chr2_C_albicans_SC5314	21115
Ca21chr2_C_albicans_SC5314	18984		Ca21chr2_C_albicans_SC5314	21133
Ca21chr2_C_albicans_SC5314	20959		Ca21chr2_C_albicans_SC5314	21599
Ca21chr2_C_albicans_SC5314	21088		Ca21chr2_C_albicans_SC5314	21886
Ca21chr2_C_albicans_SC5314	21115		Ca21chr2_C_albicans_SC5314	22843
Ca21chr2_C_albicans_SC5314	21133		Ca21chr2_C_albicans_SC5314	22898
Ca21chr2_C_albicans_SC5314	21599		Ca21chr2_C_albicans_SC5314	22967
Ca21chr2_C_albicans_SC5314	21886		Ca21chr2_C_albicans_SC5314	23015
Ca21chr2_C_albicans_SC5314	22843		Ca21chr2_C_albicans_SC5314	23054
Ca21chr2_C_albicans_SC5314	22898		Ca21chr2_C_albicans_SC5314	23105
Ca21chr2_C_albicans_SC5314	22967		Ca21chr2_C_albicans_SC5314	23108
Ca21chr2_C_albicans_SC5314	23015		Ca21chr2_C_albicans_SC5314	23303
Ca21chr2_C_albicans_SC5314	23054		Ca21chr2_C_albicans_SC5314	23342
Ca21chr2_C_albicans_SC5314	23105		Ca21chr2_C_albicans_SC5314	23668
Ca21chr2_C_albicans_SC5314	23108		Ca21chr2_C_albicans_SC5314	23710
Ca21chr2_C_albicans_SC5314	23303		Ca21chr2_C_albicans_SC5314	23912
Ca21chr2_C_albicans_SC5314	23342		Ca21chr2_C_albicans_SC5314	23944
Ca21chr2_C_albicans_SC5314	23668		Ca21chr2_C_albicans_SC5314	23986
Ca21chr2_C_albicans_SC5314	23710		Ca21chr2_C_albicans_SC5314	24001
Ca21chr2_C_albicans_SC5314	23912		Ca21chr2_C_albicans_SC5314	24322
Ca21chr2_C_albicans_SC5314	23944		Ca21chr2_C_albicans_SC5314	24535
Ca21chr2_C_albicans_SC5314	23986		Ca21chr2_C_albicans_SC5314	24622
Ca21chr2_C_albicans_SC5314	24001		Ca21chr2_C_albicans_SC5314	24675
Ca21chr2_C_albicans_SC5314	24322		Ca21chr2_C_albicans_SC5314	24775
Ca21chr2_C_albicans_SC5314	24535		Ca21chr2_C_albicans_SC5314	27139
Ca21chr2_C_albicans_SC5314	24622		Ca21chr2_C_albicans_SC5314	27603
Ca21chr2_C_albicans_SC5314	24675		Ca21chr2_C_albicans_SC5314	27712
Ca21chr2_C_albicans_SC5314	24775		Ca21chr2_C_albicans_SC5314	29214
Ca21chr2_C_albicans_SC5314	27139		Ca21chr2_C_albicans_SC5314	30802
Ca21chr2_C_albicans_SC5314	27603		Ca21chr2_C_albicans_SC5314	30882
Ca21chr2_C_albicans_SC5314	27712		Ca21chr2_C_albicans_SC5314	30911
Ca21chr2_C_albicans_SC5314	29214		Ca21chr2_C_albicans_SC5314	31682
Ca21chr2_C_albicans_SC5314	30802		Ca21chr2_C_albicans_SC5314	31915
Ca21chr2_C_albicans_SC5314	30882		Ca21chr2_C_albicans_SC5314	33823
Ca21chr2_C_albicans_SC5314	30911		Ca21chr2_C_albicans_SC5314	34318
Ca21chr2_C_albicans_SC5314	31682		Ca21chr2_C_albicans_SC5314	34622
Ca21chr2_C_albicans_SC5314	31915		Ca21chr2_C_albicans_SC5314	34624
Ca21chr2_C_albicans_SC5314	33823		Ca21chr2_C_albicans_SC5314	34633
Ca21chr2_C_albicans_SC5314	34318		Ca21chr2_C_albicans_SC5314	34654
Ca21chr2_C_albicans_SC5314	34622		Ca21chr2_C_albicans_SC5314	35591
Ca21chr2_C_albicans_SC5314	34624		Ca21chr2_C_albicans_SC5314	36079
Ca21chr2_C_albicans_SC5314	34633		Ca21chr2_C_albicans_SC5314	40794
Ca21chr2_C_albicans_SC5314	34654		Ca21chr2_C_albicans_SC5314	41283
Ca21chr2_C_albicans_SC5314	35591		Ca21chr2_C_albicans_SC5314	41576
Ca21chr2_C_albicans_SC5314	36079		Ca21chr2_C_albicans_SC5314	44376
Ca21chr2_C_albicans_SC5314	40794		Ca21chr2_C_albicans_SC5314	44654
Ca21chr2_C_albicans_SC5314	41283		Ca21chr2_C_albicans_SC5314	44754
Ca21chr2_C_albicans_SC5314	41576		Ca21chr2_C_albicans_SC5314	44762
Ca21chr2_C_albicans_SC5314	44376		Ca21chr2_C_albicans_SC5314	44766
Ca21chr2_C_albicans_SC5314	44654		Ca21chr2_C_albicans_SC5314	44779
Ca21chr2_C_albicans_SC5314	44754		Ca21chr2_C_albicans_SC5314	44780
Ca21chr2_C_albicans_SC5314	44762		Ca21chr2_C_albicans_SC5314	46036
Ca21chr2_C_albicans_SC5314	44766		Ca21chr2_C_albicans_SC5314	46950
Ca21chr2_C_albicans_SC5314	44779		Ca21chr2_C_albicans_SC5314	47167
Ca21chr2_C_albicans_SC5314	44780		Ca21chr2_C_albicans_SC5314	47664
Ca21chr2_C_albicans_SC5314	46036		Ca21chr2_C_albicans_SC5314	48685
Ca21chr2_C_albicans_SC5314	46950		Ca21chr2_C_albicans_SC5314	48775
Ca21chr2_C_albicans_SC5314	47167		Ca21chr2_C_albicans_SC5314	50410
Ca21chr2_C_albicans_SC5314	47664		Ca21chr2_C_albicans_SC5314	52656
Ca21chr2_C_albicans_SC5314	48685		Ca21chr2_C_albicans_SC5314	57803
Ca21chr2_C_albicans_SC5314	48775		Ca21chr2_C_albicans_SC5314	60915
Ca21chr2_C_albicans_SC5314	50410		Ca21chr2_C_albicans_SC5314	61615
Ca21chr2_C_albicans_SC5314	52656		Ca21chr2_C_albicans_SC5314	64314
Ca21chr2_C_albicans_SC5314	57803		Ca21chr2_C_albicans_SC5314	64374
Ca21chr2_C_albicans_SC5314	60915		Ca21chr2_C_albicans_SC5314	64377
Ca21chr2_C_albicans_SC5314	61615		Ca21chr2_C_albicans_SC5314	64395
Ca21chr2_C_albicans_SC5314	64314		Ca21chr2_C_albicans_SC5314	64404
Ca21chr2_C_albicans_SC5314	64374		Ca21chr2_C_albicans_SC5314	69245
Ca21chr2_C_albicans_SC5314	64377		Ca21chr2_C_albicans_SC5314	69335
Ca21chr2_C_albicans_SC5314	64395		Ca21chr2_C_albicans_SC5314	69447
Ca21chr2_C_albicans_SC5314	64404		Ca21chr2_C_albicans_SC5314	69640
Ca21chr2_C_albicans_SC5314	69245		Ca21chr2_C_albicans_SC5314	70677
Ca21chr2_C_albicans_SC5314	69335		Ca21chr2_C_albicans_SC5314	71363
Ca21chr2_C_albicans_SC5314	69447		Ca21chr2_C_albicans_SC5314	73614
Ca21chr2_C_albicans_SC5314	69640		Ca21chr2_C_albicans_SC5314	73706
Ca21chr2_C_albicans_SC5314	70677		Ca21chr2_C_albicans_SC5314	74425
Ca21chr2_C_albicans_SC5314	71363		Ca21chr2_C_albicans_SC5314	74647
Ca21chr2_C_albicans_SC5314	73614		Ca21chr2_C_albicans_SC5314	75963
Ca21chr2_C_albicans_SC5314	73706		Ca21chr2_C_albicans_SC5314	76247
Ca21chr2_C_albicans_SC5314	74425		Ca21chr2_C_albicans_SC5314	76635
Ca21chr2_C_albicans_SC5314	74647		Ca21chr2_C_albicans_SC5314	76658
Ca21chr2_C_albicans_SC5314	75963		Ca21chr2_C_albicans_SC5314	77022
Ca21chr2_C_albicans_SC5314	76247		Ca21chr2_C_albicans_SC5314	78385
Ca21chr2_C_albicans_SC5314	76635		Ca21chr2_C_albicans_SC5314	78421
Ca21chr2_C_albicans_SC5314	76658		Ca21chr2_C_albicans_SC5314	78475
Ca21chr2_C_albicans_SC5314	77022		Ca21chr2_C_albicans_SC5314	78512
Ca21chr2_C_albicans_SC5314	78385		Ca21chr2_C_albicans_SC5314	78991
Ca21chr2_C_albicans_SC5314	78421		Ca21chr2_C_albicans_SC5314	79105
Ca21chr2_C_albicans_SC5314	78475		Ca21chr2_C_albicans_SC5314	79231
Ca21chr2_C_albicans_SC5314	78512		Ca21chr2_C_albicans_SC5314	79976
Ca21chr2_C_albicans_SC5314	78991		Ca21chr2_C_albicans_SC5314	81782
Ca21chr2_C_albicans_SC5314	79105		Ca21chr2_C_albicans_SC5314	85458
Ca21chr2_C_albicans_SC5314	79231		Ca21chr2_C_albicans_SC5314	95772
Ca21chr2_C_albicans_SC5314	79976		Ca21chr2_C_albicans_SC5314	95804
Ca21chr2_C_albicans_SC5314	81782		Ca21chr2_C_albicans_SC5314	97405
Ca21chr2_C_albicans_SC5314	85458		Ca21chr2_C_albicans_SC5314	102318
Ca21chr2_C_albicans_SC5314	95772		Ca21chr2_C_albicans_SC5314	102320
Ca21chr2_C_albicans_SC5314	95804		Ca21chr2_C_albicans_SC5314	103245
Ca21chr2_C_albicans_SC5314	97405		Ca21chr2_C_albicans_SC5314	103910
Ca21chr2_C_albicans_SC5314	102318		Ca21chr2_C_albicans_SC5314	103988
Ca21chr2_C_albicans_SC5314	102320		Ca21chr2_C_albicans_SC5314	104009
Ca21chr2_C_albicans_SC5314	103245		Ca21chr2_C_albicans_SC5314	107465
Ca21chr2_C_albicans_SC5314	103910		Ca21chr2_C_albicans_SC5314	107612
Ca21chr2_C_albicans_SC5314	103988		Ca21chr2_C_albicans_SC5314	115531
Ca21chr2_C_albicans_SC5314	104009		Ca21chr2_C_albicans_SC5314	115564
Ca21chr2_C_albicans_SC5314	107465		Ca21chr2_C_albicans_SC5314	118400
Ca21chr2_C_albicans_SC5314	107612		Ca21chr2_C_albicans_SC5314	118826
Ca21chr2_C_albicans_SC5314	115531		Ca21chr2_C_albicans_SC5314	119997
Ca21chr2_C_albicans_SC5314	115564		Ca21chr2_C_albicans_SC5314	120037
Ca21chr2_C_albicans_SC5314	118400		Ca21chr2_C_albicans_SC5314	121067
Ca21chr2_C_albicans_SC5314	118826		Ca21chr2_C_albicans_SC5314	121769
Ca21chr2_C_albicans_SC5314	119997		Ca21chr2_C_albicans_SC5314	122459
Ca21chr2_C_albicans_SC5314	120037		Ca21chr2_C_albicans_SC5314	124274
Ca21chr2_C_albicans_SC5314	121067		Ca21chr2_C_albicans_SC5314	125467
Ca21chr2_C_albicans_SC5314	121769		Ca21chr2_C_albicans_SC5314	125619
Ca21chr2_C_albicans_SC5314	122459		Ca21chr2_C_albicans_SC5314	125667
Ca21chr2_C_albicans_SC5314	124274		Ca21chr2_C_albicans_SC5314	125674
Ca21chr2_C_albicans_SC5314	125467		Ca21chr2_C_albicans_SC5314	125940
Ca21chr2_C_albicans_SC5314	125619		Ca21chr2_C_albicans_SC5314	126069
Ca21chr2_C_albicans_SC5314	125667		Ca21chr2_C_albicans_SC5314	126126
Ca21chr2_C_albicans_SC5314	125674		Ca21chr2_C_albicans_SC5314	126813
Ca21chr2_C_albicans_SC5314	125940		Ca21chr2_C_albicans_SC5314	128255
Ca21chr2_C_albicans_SC5314	126069		Ca21chr2_C_albicans_SC5314	128378
Ca21chr2_C_albicans_SC5314	126126		Ca21chr2_C_albicans_SC5314	136340
Ca21chr2_C_albicans_SC5314	126813		Ca21chr2_C_albicans_SC5314	136943
Ca21chr2_C_albicans_SC5314	128255		Ca21chr2_C_albicans_SC5314	140496
Ca21chr2_C_albicans_SC5314	128378		Ca21chr2_C_albicans_SC5314	140575
Ca21chr2_C_albicans_SC5314	136340		Ca21chr2_C_albicans_SC5314	140819
Ca21chr2_C_albicans_SC5314	136943		Ca21chr2_C_albicans_SC5314	141086
Ca21chr2_C_albicans_SC5314	140496		Ca21chr2_C_albicans_SC5314	141266
Ca21chr2_C_albicans_SC5314	140575		Ca21chr2_C_albicans_SC5314	141401
Ca21chr2_C_albicans_SC5314	140819		Ca21chr2_C_albicans_SC5314	141699
Ca21chr2_C_albicans_SC5314	141086		Ca21chr2_C_albicans_SC5314	142274
Ca21chr2_C_albicans_SC5314	141266		Ca21chr2_C_albicans_SC5314	143766
Ca21chr2_C_albicans_SC5314	141401		Ca21chr2_C_albicans_SC5314	144250
Ca21chr2_C_albicans_SC5314	141699		Ca21chr2_C_albicans_SC5314	144556
Ca21chr2_C_albicans_SC5314	142274		Ca21chr2_C_albicans_SC5314	150110
Ca21chr2_C_albicans_SC5314	143766		Ca21chr2_C_albicans_SC5314	150149
Ca21chr2_C_albicans_SC5314	144250		Ca21chr2_C_albicans_SC5314	151247
Ca21chr2_C_albicans_SC5314	144556		Ca21chr2_C_albicans_SC5314	151366
Ca21chr2_C_albicans_SC5314	150110		Ca21chr2_C_albicans_SC5314	151622
Ca21chr2_C_albicans_SC5314	150149		Ca21chr2_C_albicans_SC5314	151779
Ca21chr2_C_albicans_SC5314	151247		Ca21chr2_C_albicans_SC5314	153033
Ca21chr2_C_albicans_SC5314	151366		Ca21chr2_C_albicans_SC5314	153152
Ca21chr2_C_albicans_SC5314	151622		Ca21chr2_C_albicans_SC5314	153400
Ca21chr2_C_albicans_SC5314	151779		Ca21chr2_C_albicans_SC5314	153479
Ca21chr2_C_albicans_SC5314	153033		Ca21chr2_C_albicans_SC5314	153540
Ca21chr2_C_albicans_SC5314	153152		Ca21chr2_C_albicans_SC5314	154420
Ca21chr2_C_albicans_SC5314	153400		Ca21chr2_C_albicans_SC5314	154923
Ca21chr2_C_albicans_SC5314	153479		Ca21chr2_C_albicans_SC5314	155016
Ca21chr2_C_albicans_SC5314	153540		Ca21chr2_C_albicans_SC5314	155158
Ca21chr2_C_albicans_SC5314	154420		Ca21chr2_C_albicans_SC5314	155889
Ca21chr2_C_albicans_SC5314	154923		Ca21chr2_C_albicans_SC5314	155913
Ca21chr2_C_albicans_SC5314	155016		Ca21chr2_C_albicans_SC5314	156063
Ca21chr2_C_albicans_SC5314	155158		Ca21chr2_C_albicans_SC5314	156428
Ca21chr2_C_albicans_SC5314	155889		Ca21chr2_C_albicans_SC5314	156656
Ca21chr2_C_albicans_SC5314	155913		Ca21chr2_C_albicans_SC5314	156749
Ca21chr2_C_albicans_SC5314	156063		Ca21chr2_C_albicans_SC5314	156766
Ca21chr2_C_albicans_SC5314	156428		Ca21chr2_C_albicans_SC5314	156817
Ca21chr2_C_albicans_SC5314	156656		Ca21chr2_C_albicans_SC5314	156859
Ca21chr2_C_albicans_SC5314	156749		Ca21chr2_C_albicans_SC5314	158248
[truncated: 3,191 more rows]
